# Supplementary material for: Design, synthesis, in silico studies, and biological evaluation of novel pyrimidine-5-carbonitrile derivatives as potential anti-proliferative agents, VEGFR-2 inhibitors and apoptotic inducers
Source: Royal Society of Chemistry journal article supplement (doi:10.1039/d3ra04182d), 2023-01-01

**Design, synthesis, *in silico* studies, and biological evaluation of novel pyrimidine-5-carbonitrile derivatives as potential anti-proliferative agents, VEGFR-2 inhibitors and apoptotic inducers**

Abdulrahman M. Saleh, Hazem A. Mahdy<sup>a\*</sup>, Mohamed Ayman El-Zahabi<sup>a</sup>, Ahmed B. M. Mehany<sup>b</sup>, Mohamed M. Khalifa<sup>a\*</sup>, Ibrahim H. Eissa<sup>a\*</sup>

<sup>a</sup> Pharmaceutical Medicinal Chemistry & Drug Design Department, Faculty of Pharmacy (Boys), Al-Azhar University, Cairo 11884, Egypt.

<sup>b</sup> Zoology Department, Faculty of Science (Boys), Al-Azhar University, Cairo 11884, Egypt

**\* Corresponding authors:**

**Ibrahim H. Eissa**

Pharmaceutical Medicinal Chemistry & Drug Design Department, Faculty of Pharmacy (Boys), Al-Azhar University, Cairo 11884, Egypt

**Email:** [Ibrahimeissa@azhar.edu.eg](mailto:Ibrahimeissa@azhar.edu.eg)

**Hazem A. Mahdy**

Pharmaceutical Medicinal Chemistry & Drug Design Department, Faculty of Pharmacy (Boys), Al-Azhar University, Cairo 11884, Egypt

**Email:** [Hazem\\_hady2001@azhar.edu.eg](mailto:Hazem_hady2001@azhar.edu.eg)

**Mohamed M. Khalifa**

Pharmaceutical Medicinal Chemistry & Drug Design Department, Faculty of Pharmacy (Boys), Al-Azhar University, Cairo 11884, Egypt.

**Email:** [MohamedKhalifa2321.el@azhar.edu.eg](mailto:MohamedKhalifa2321.el@azhar.edu.eg)

## Content

|   |                                                                                                                                                                   |
|---|-------------------------------------------------------------------------------------------------------------------------------------------------------------------|
| 1 | All the reagents, chemicals, apparatus used in chemistry section                                                                                                  |
| 2 | Experimental of biological testing                                                                                                                                |
| 3 | Spectral data of intermediate and final target compounds ( <b>3</b> , <b>4</b> , <b>5</b> , <b>6</b> , <b>8</b> , <b>9a-d</b> , <b>11a-e</b> , and <b>12a-g</b> ) |

### All the reagents, chemicals, apparatus used in chemistry section.

All melting points had been concluded by open capillary system on Stuart melting point apparatus SMP30 and had been uncorrected. The IR spectra were certified on a Bruker FT/IR-ATR spectrometer and expressed in wave number ( $\text{cm}^{-1}$ ). The  $^1\text{H}$  NMR spectra were recorded at 400 MHz while  $^{13}\text{C}$  NMR spectra were run at 100 MHz, on a Bruker 400 MHz-NMR spectrophotometer. TMS was used as internal standard, coupling constant ( $J$ ) values were given in Hertz, chemical shifts were measured in  $\delta$  (ppm) and recorded relative to ( $\text{DMSO-}d_6$ ) solvent. The mass spectra were acquired on Varian Mat 311-A spectrometer (70 e.v.). Progress of reactions were monitored by TLC using TLC sheets coated with UV fluorescent silica gel and were visualized using UV lamp and different developing solvent system of DCM / methanol mixtures as mobile phases. Purity of the synthesized compounds was performed using a Waters Alliance 2695 HPLC, Column Thermo HYPERSIL BDS C18.

**Table S-1:** Signaling ratio of each signal group for compounds **11b** and **12b**.

| Compound   | Key groups       | Total integration | Integration of the 1 <sup>st</sup> signal (%) | Integration of the 2 <sup>nd</sup> signal (%) |
|------------|------------------|-------------------|-----------------------------------------------|-----------------------------------------------|
| <b>11b</b> | CH <sub>3</sub>  | 3.13              | 1.76<br>(56.2)                                | 1.37<br>(43.8)                                |
|            | SCH <sub>3</sub> | 3.20              | 1.93<br>(60.3)                                | 1.27<br>(39.7)                                |
|            | NH               | 1.20              | 0.59<br>(57.85)                               | 0.43<br>(42.15)                               |
|            | CONH             | 1.30              | 0.60                                          | 0.43                                          |

|            |                  |      |                 |                 |
|------------|------------------|------|-----------------|-----------------|
|            |                  |      | (58.25)         | (41.75)         |
| <b>12b</b> | CH <sub>3</sub>  | 2.94 | 1.95<br>(66.32) | 0.99<br>(33.67) |
|            | SCH <sub>3</sub> | 3.11 | 2.01<br>(64.63) | 1.10<br>(35.36) |
|            | NH               | 0.86 | 0.53<br>(61.62) | 0.33<br>(38.37) |
|            | CONH             | 0.74 | 0.43<br>(58.10) | 0.31<br>(41.89) |

### **Biological testing**

#### **1. *In vitro* anti-proliferative activity**

MTT assay protocol was applied as described previously to assess the anti-proliferative activity of the synthesized compounds. Two human cancer cell lines (HCT-116 and MCF-7 ) were used in this test. At first, the cell lines were cultured in RPMI-1640 medium with 10% fetal bovine serum. Antibiotics (100 unit's/ml penicillin and 100 µg/ml streptomycin) were added at 37°C in a 5% CO<sub>2</sub> incubator. The cell lines were seeded in a 96-well plate at a density of 1.0 x 10<sup>4</sup> cells / well at 37° C for 24 h under 5% CO<sub>2</sub>. After incubation, the cells were treated with different concentrations of the synthesized compounds and incubated for 48 h. After 48 h of drug treatment, 20 µl of MTT solution at 5mg/ml was added and incubated for 4 h. Dimethyl sulfoxide (DMSO) in volume of 100 µl was added into each well to dissolve the purple formazan formed. The colorimetric assay was measured and recorded at absorbance of 570 nm using a plate reader (EXL 800, USA). The relative cell viability in percentage was calculated as (A<sub>570</sub> of treated samples/A<sub>570</sub> of untreated sample) X 100. The half maximal inhibitory concentration (IC<sub>50</sub>) values are presented using non-linear regression analysis of the data set from three experiments with three plate wells were used for an individual concentration.

#### **2. *In vitro* VEGFR-2 TK assay**

The most active derivatives (**9d**, **11b**, **11c**, **11d**, **11e**, **12b**, **12c**, and **12d**) that exhibited promising antiproliferative activities against HCT-116 and MCF-7 cell lines were tested for its inhibitory activity against VEGFR-2 TK. Human VEGFR-2 TK ELISA kit (Enzyme-Linked

Immunosorbent Assay) was utilized in this test. At first, specific antibody for VEGFR-2 TK was seeded on a 96-well plate and 100  $\mu\text{L}$  of the standard solution or the tested compound was added, all were incubated at room temperature for 2.5 h. Then washed, 100  $\mu\text{L}$  of the prepared biotin antibody was added, then incubated at room temperature for an additional 1 h. and washed. Then, 100  $\mu\text{L}$  of streptavidin solution was added and incubated for 45 min. at room temperature and washed again, 100  $\mu\text{L}$  of TMB Substrate reagent was added and incubated for 30 min. at room temperature. 50  $\mu\text{L}$  of the stop solution was added, then was read at 450 nm immediately. The standard curve was drawn, concentrations on the X-axis and the absorbance on the Y-axis.

### **3. Flow cytometry analysis for cell cycle**

To investigate the effect of the synthesized compounds on the various phases of the cell cycle in HCT-116 cells, flow cytometric analysis of cell cycle was performed using Epics XL-MCL™ Flow Cytometer according to flow cytometric analysis technique.

Flow Cytometry Kit for Cell Cycle Analysis (ab139418\_Propidium Iodide Flow Cytometry Kit/BD) was used in this test. HCT-116 cells were treated with compound **11e** ( $1.14 \pm 0.01 \mu\text{M}$ ) for 24 h. Then, the cells were fixed in 70% ethanol at 4 °C for 12 h. After that, the cells were washed with cold PBS, incubated with 100  $\mu\text{l}$  RNase A at 37 °C for 30 min, and stained with 400  $\mu\text{l}$  PI in the dark at room temperature for a further 30 min. The stained cells were measured using Epics XL-MCL™ Flow Cytometer (Beckman Coulter), and the data were analyzed using Flowing software (version 2.5.1, Turku Center for Biotechnology, Turku, Finland).

### **4. Flow cytometry analysis for apoptosis**

Flow cytometry cell apoptosis analysis was used to investigate the apoptotic effect of the synthesized compounds. HCT-116 cells were treated with compound **11e** ( $1.14 \pm 0.01 \mu\text{M}$ ) for 24 h, collected by trypsin, centrifuged, washed two successive times with PBS, suspended in 500  $\mu\text{l}$  binding buffer, and double stained with 5  $\mu\text{l}$  Annexin V-FITC and 5  $\mu\text{l}$  PI in the dark at room temperature for 15 min. The stained cells were measured using Epics XL-MCL™ Flow Cytometer and analyzed using Flowing software.

### **5. *In vitro* immunomodulatory assay of TNF- $\alpha$ and IL-6.**

The effects of compound **11e** on the expression of TNF- $\alpha$  and IL-6 were determined using qRT-PCR technique. The quantity of immunomodulatory proteins (TNF- $\alpha$  and IL-6) in control and compound **11e** (at the IC<sub>50</sub> concentration)-treated HCT-116 cells was assessed by qRT-PCR (reference). Total RNA from vehicle-treated control (0.01% DMSO) and 10k-treated HCT-116 cells were extracted as-per the manufacturer instructions (RNeasy mini kit, Qiagen, Germany). After RNA extraction, cDNA was prepared using the Revert Aid First Strand cDNA Synthesis kit (Thermo Scientific, USA). Amplification of target cDNA for apoptosis markers and GAPDH [as a normalization (housekeeping) gene] was done using one-step RT-PCR SYBR® Green kit Master Mix (Bio-Rad Laboratories, USA) on Rotor-Gene Q real-time PCR thermal cycler instrument. cDNA (2  $\mu$ l aliquots) was mixed with 1  $\mu$ l of forward primer, 1  $\mu$ l reverse primer, 10  $\mu$ l master mixture, and the reaction volume was completed to 20  $\mu$ l with nuclease-free water. All experiments were performed in triplicates.

## 6. Statistical analysis

Graph Pad Prism 6 software was used for statistical evaluation of the grouped data. Values are expressed as the mean  $\pm$  SEM of the triplicates of each experiment. p value of less than 0.05 was accepted as statistically significant.

### *Molecular docking studies and molecular dynamic simulation*

MOE 19.0102 software was used in the docking studies, where the binding affinities of target compounds against the ATP binding site of VEGFR-2 TK were evaluated. The 3D crystal structure of VEGFR-2 TK was downloaded from the Protein Data Bank, <http://www.rcsb.org/pdb> (PDB ID: 1YWN: 1.71 Å). At first, water molecules were deleted from the downloaded protein molecule. Energy minimization was performed by applying CHARMM and MMFF94 force fields. The active binding site was identified and prepared for docking protocol. The 2D structures of thalidomide and the target compounds were drawn using ChemBioDraw Ultra 14.0 and saved in MDL-SD file format. The re-docking of the co-crystallized ligand (4-amino-furo[2,3-d]pyrimidine) molecule into the ATP binding site of VEGFR-2 TK validated the docking process. The re-docked pose overlaid with the original one and had the same binding mode which was consistent with the reported mode (**Fig. XXX& XXX**). The re-docked pose had root mean square deviation (RMSD) 0.49 Å and docking score of -10.90 kcal/mol. After opening of the SD file and protonation of the 3D structures, energy was minimized. Preparation of the target structures was

done through optimization of the parameters. The docking process was done using the MOE 19.0102 software and Sorafenib was used as reference. A maximum of 15 conformers was considered for each molecule in the docking analysis. Then, the docking scores of the most ideal pose for each of the docked molecules were recorded (**Table xxx**).

On the other hand, Molecular dynamics simulation of the protein-ligand complexes was performed using GROMACS<sup>1</sup> 2021.1 version and Linux 5.4 package. The GROMOS96 54a7 forcefield was selected as the force field for proteins and the ligand topologies were generated from the PRODRG<sup>2</sup> server. All the complexes were solvated using simple point charge (SPC) water molecules in a rectangular box. To make the simulation system electrically neutral, the required number of Na<sup>+</sup> and Cl<sup>-</sup> ions were added while 0.15 mol/L salt concentrations were set in all the systems. Using the steepest descent method, all the solvated systems were subjected to energy minimization for 5000 steps. Afterwards, NVT (constant number of particles, volume, and temperature) series, NPT (constant number of particles, pressure, and temperature) series, and the production run were conducted in the MD simulation. The NVT and the NPT series were conducted at a 300 K temperature and 1 atm pressure for the duration of 300 ps. V-rescale thermostat and Parrinello-Rahman barostat were selected for the performed simulation. Finally, the production run was performed at 300 K for a duration of 100 ns (nanoseconds). Thereafter, a comparative analysis was performed measuring root mean square deviation (RMSD), root mean square fluctuation (RMSF), radius of gyration (Rg), solvent accessible surface area (SASA) and hydrogen bonds to analyze their stability. The Xmgrace program was used to represent the analyses in the form of plots.

**Spectral data of intermediate and final target compounds (3, 4, 5, 6, 8, 9a-d, 11a-e, and 12a-g)**

Compound 4

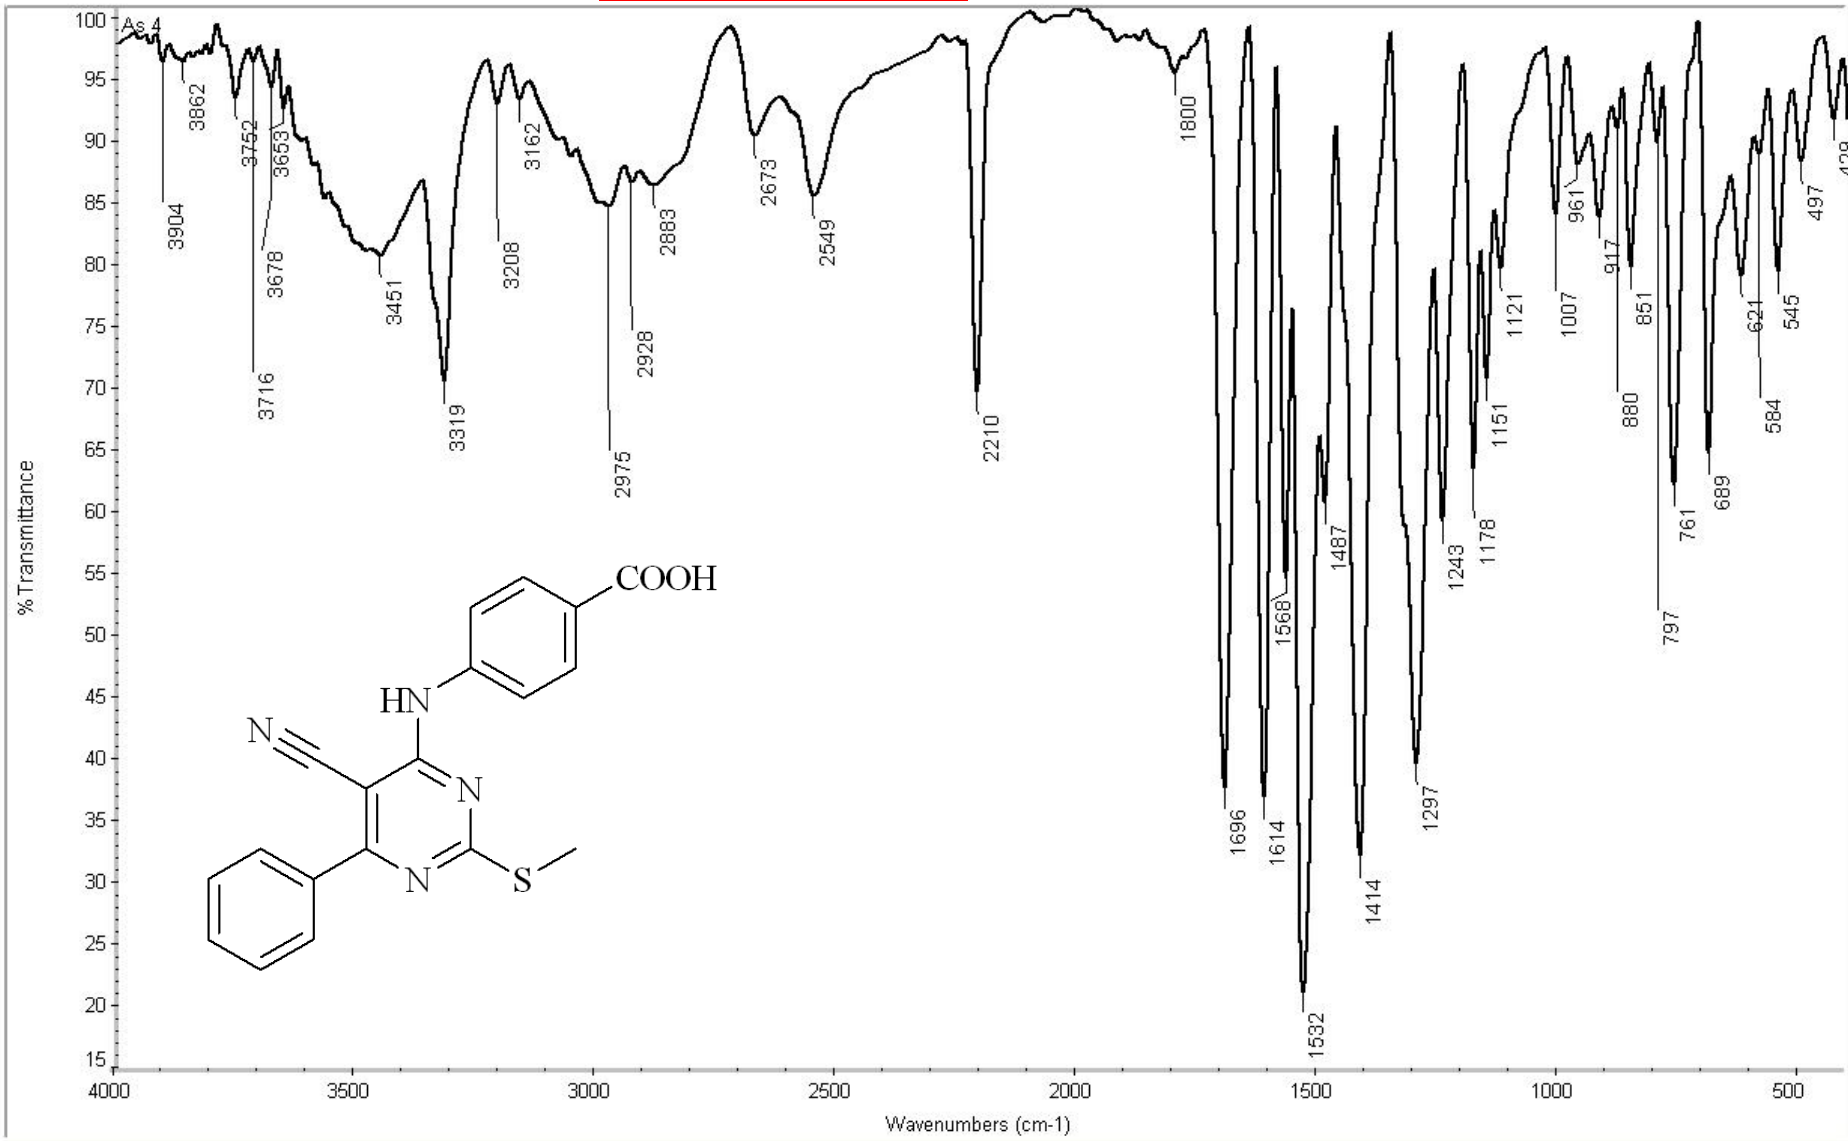

1H NMR 11h

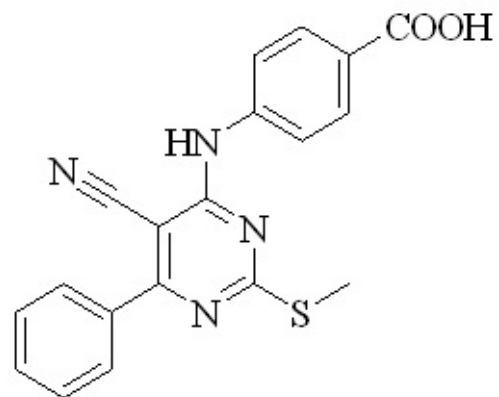

Compound 4

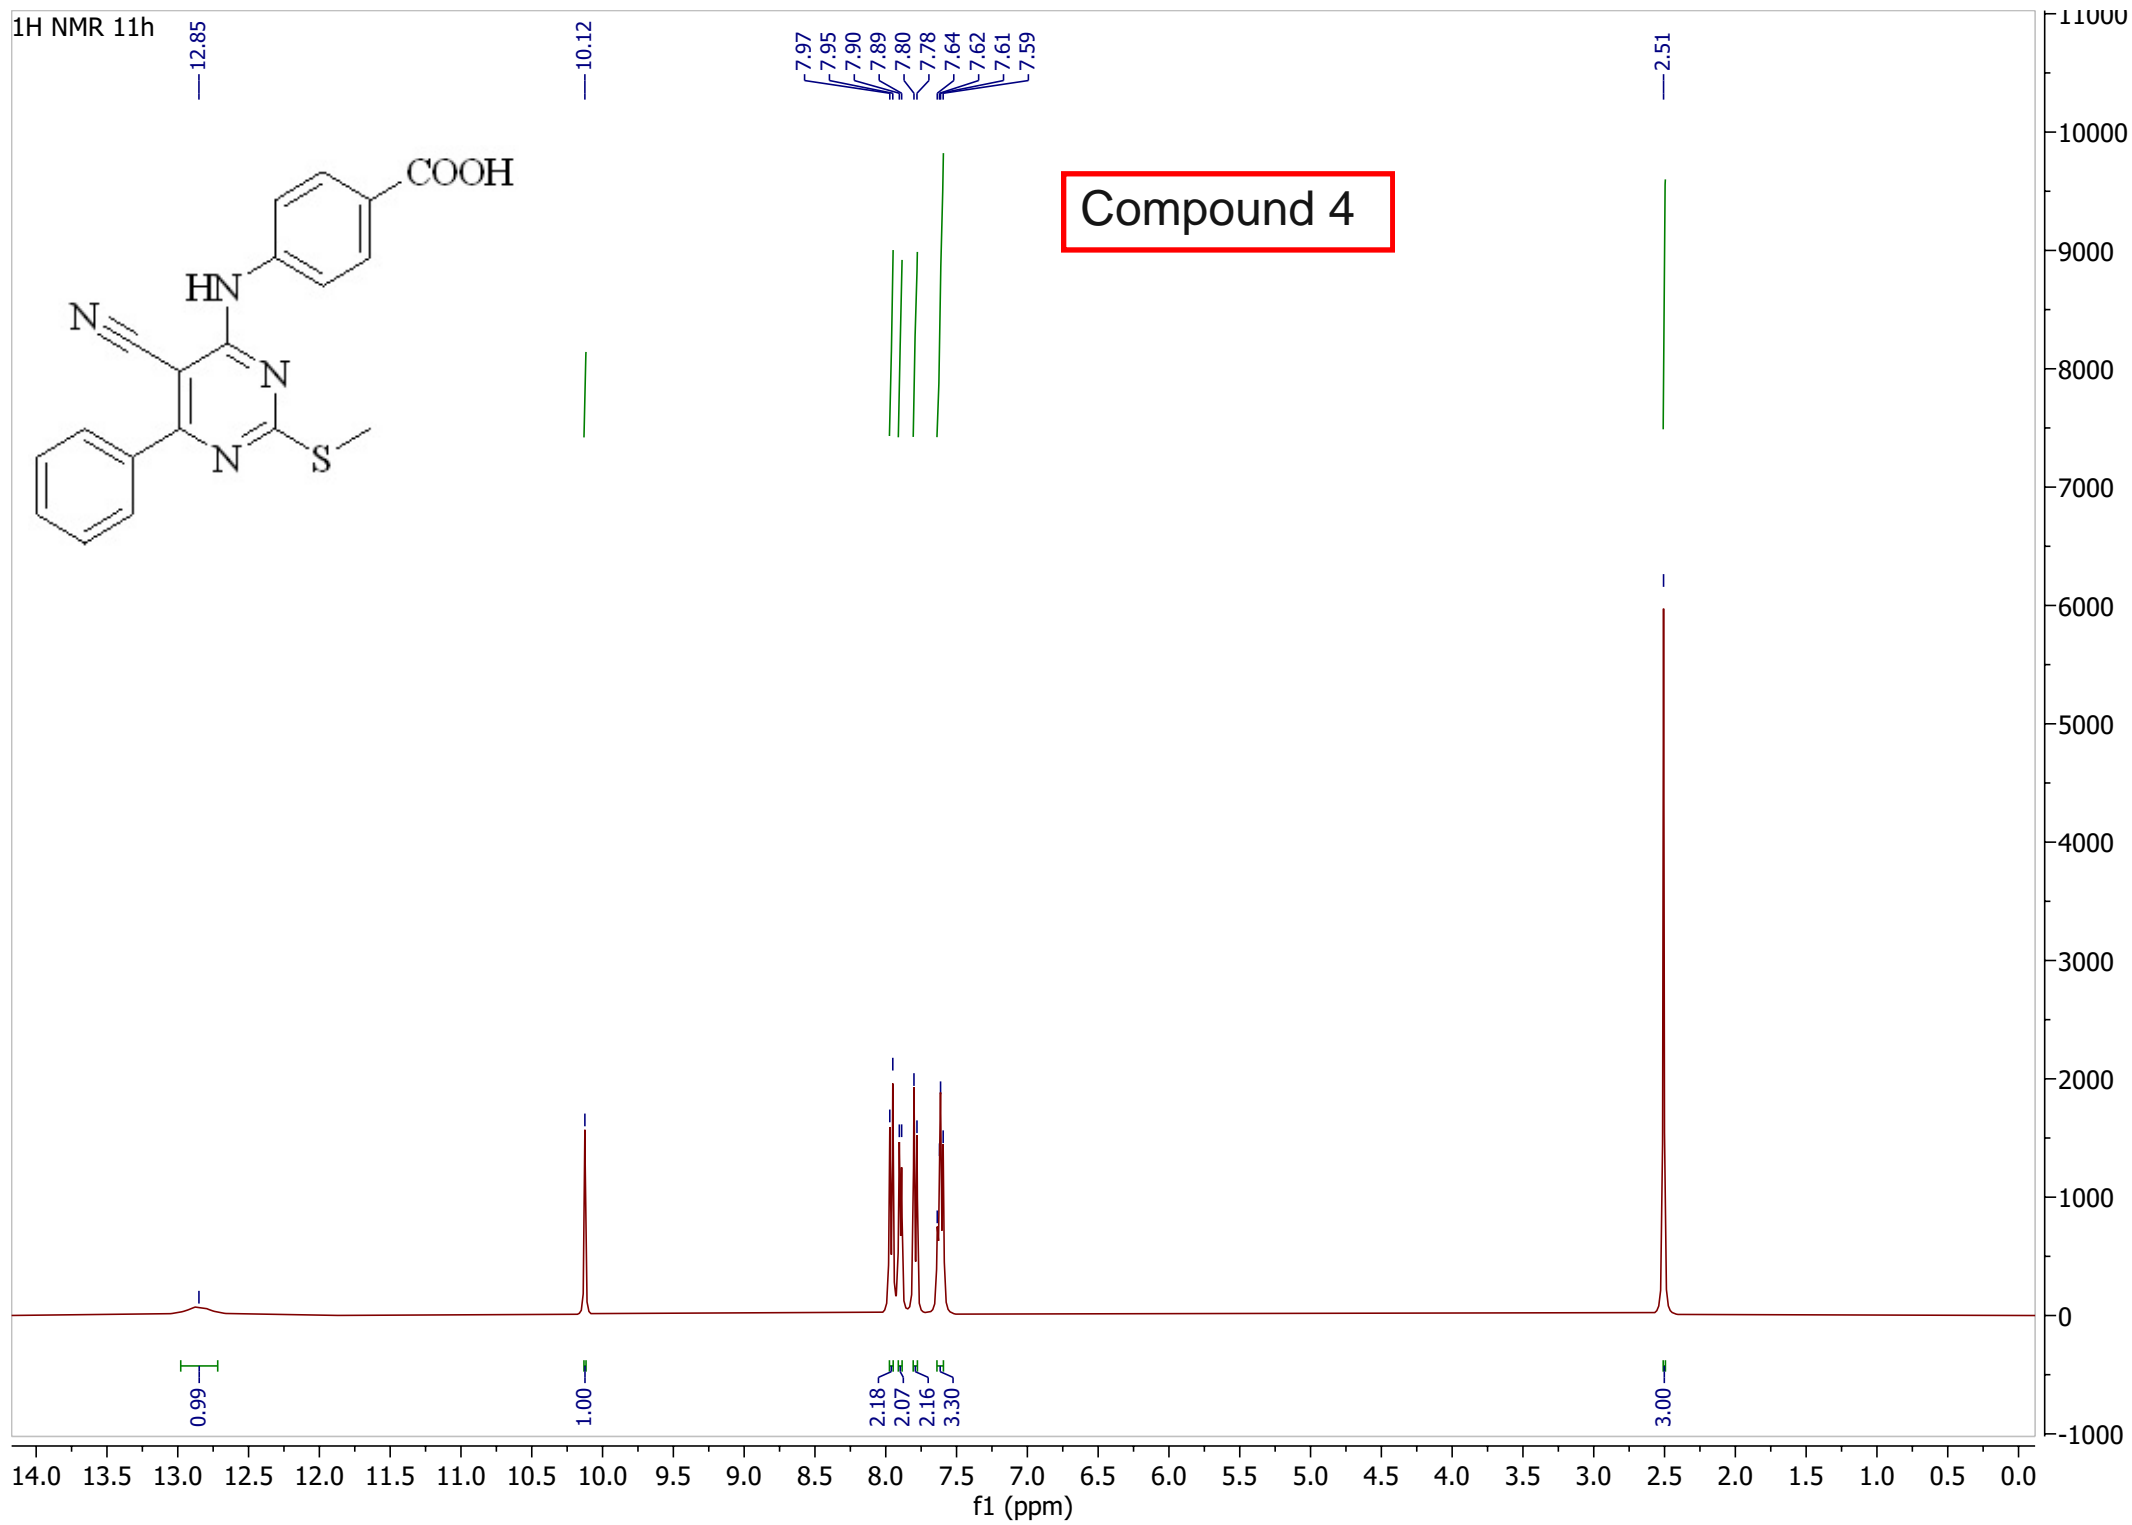



<sup>1</sup>H NMR 11h

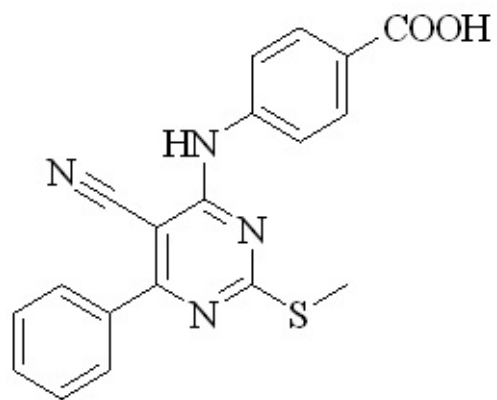

Compound 4

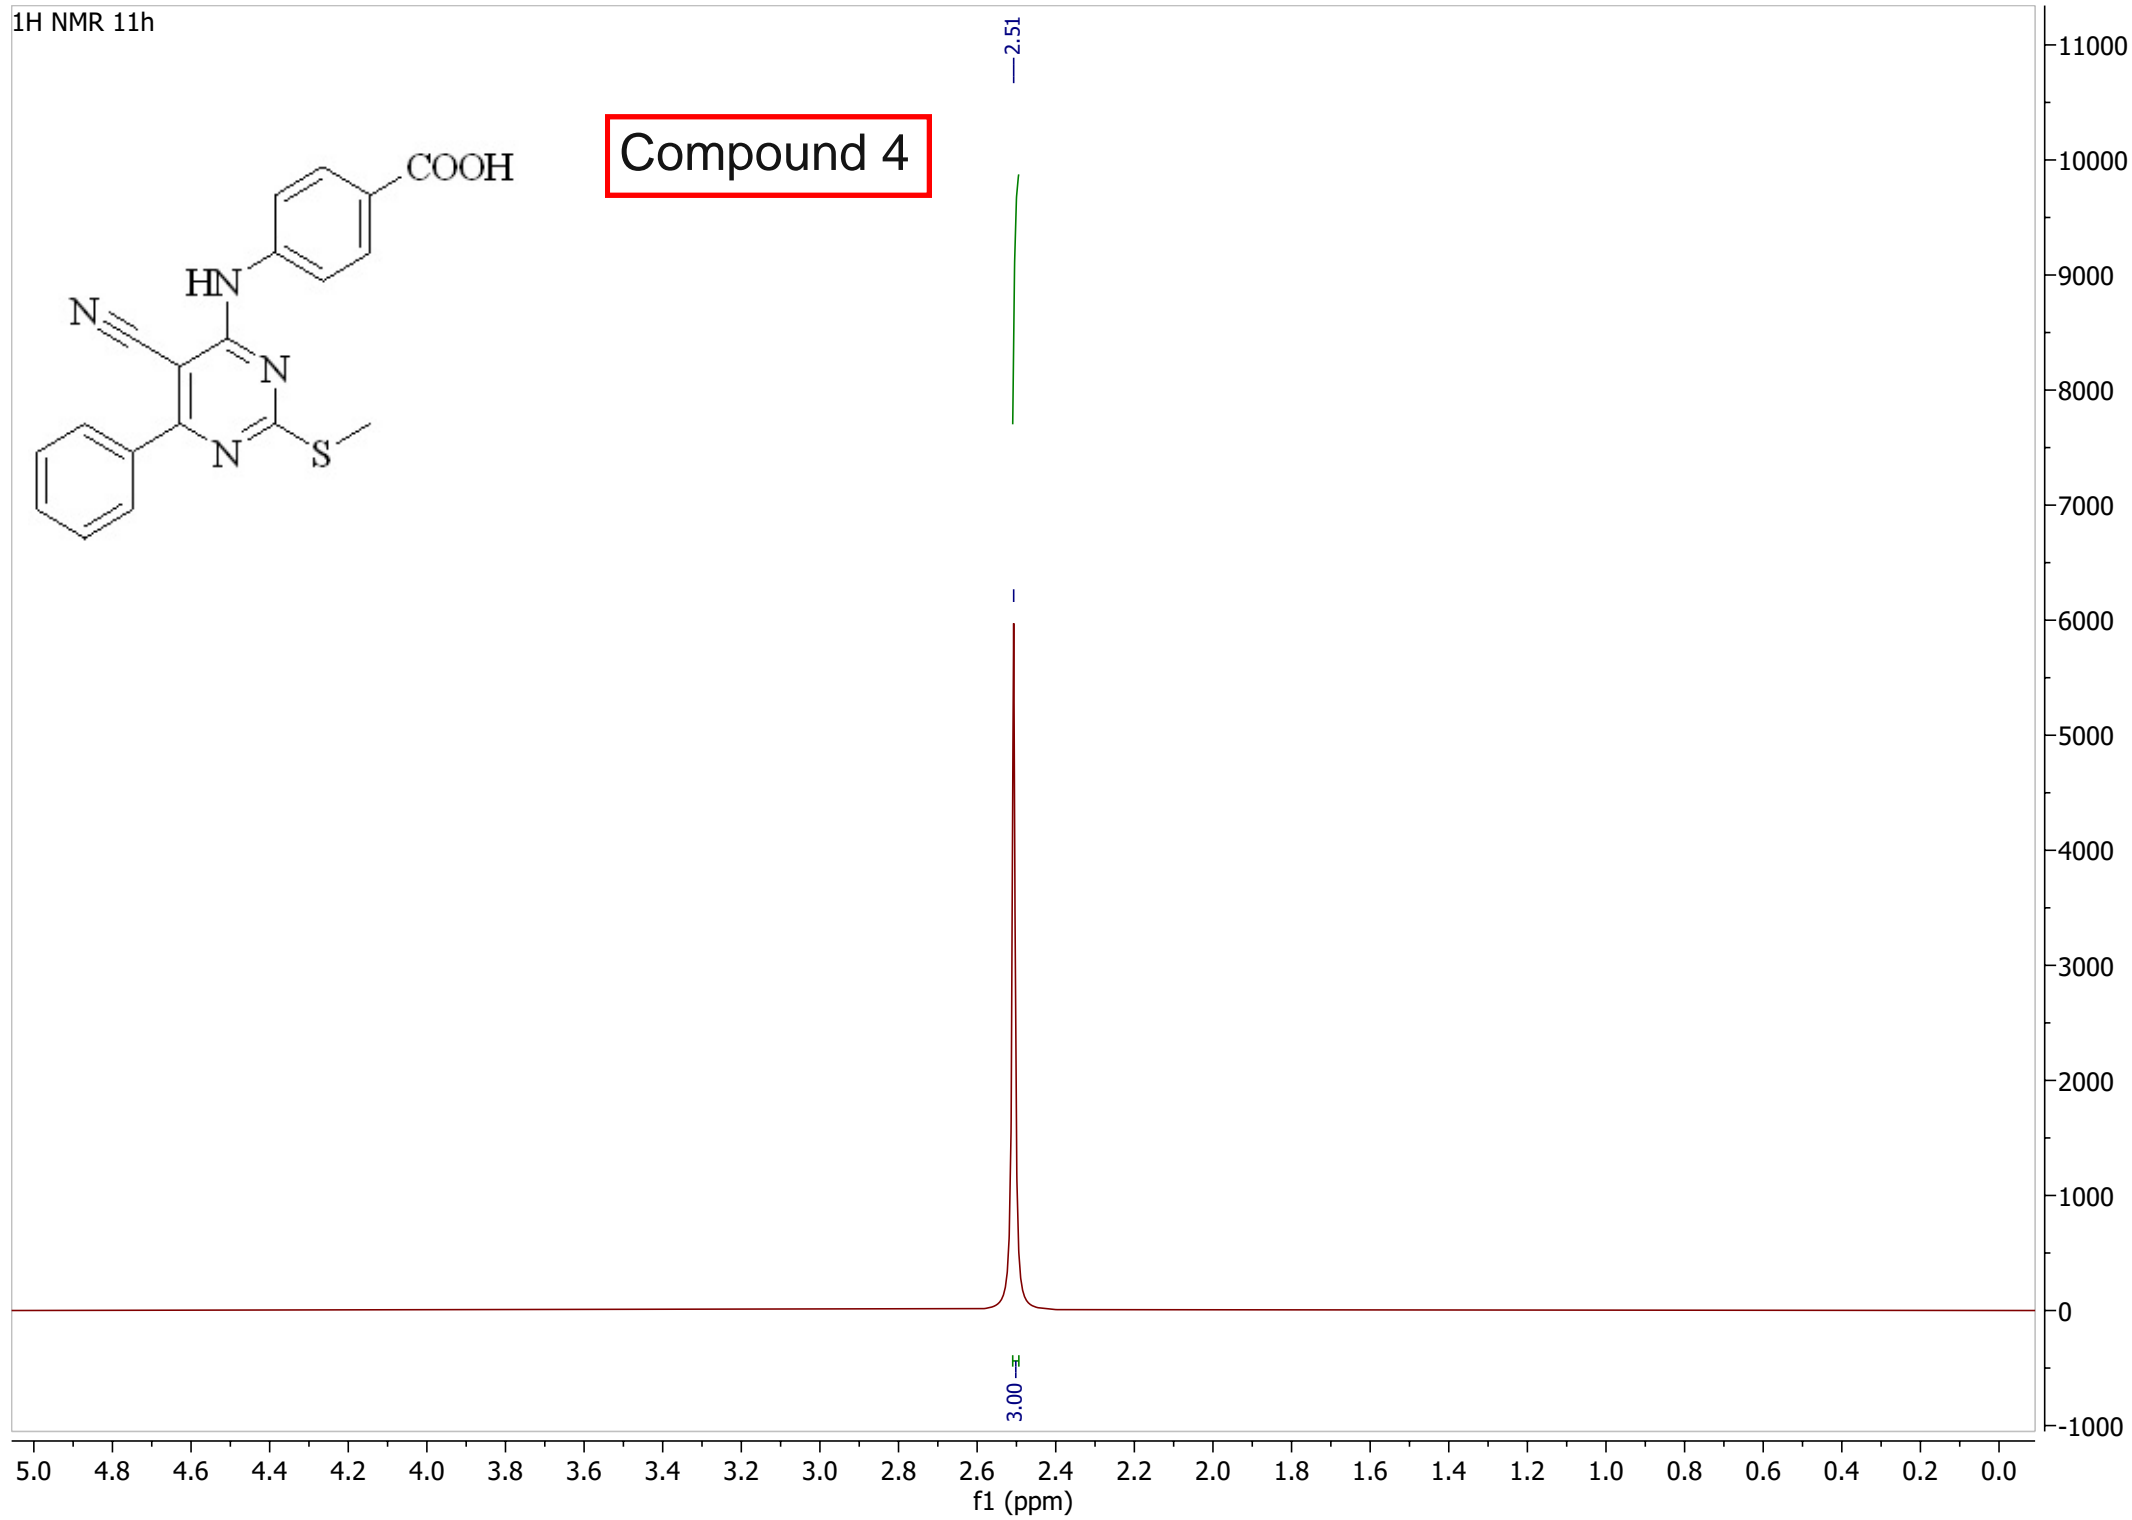

<sup>1</sup>H NMR 11h

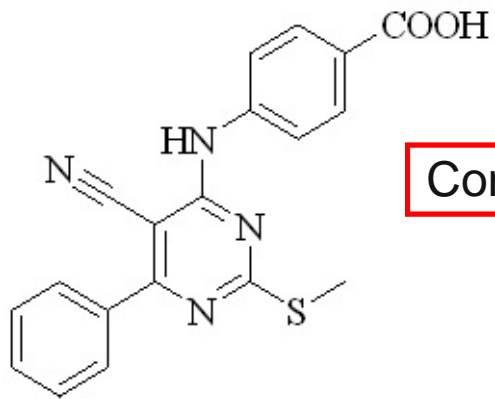

Compound 4

7.97  
7.95  
7.90  
7.89  
7.80  
7.78  
7.64  
7.62  
7.61  
7.59

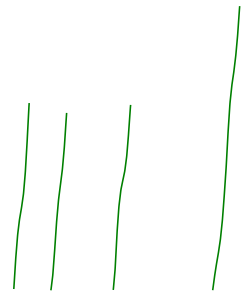

2.18  
2.07  
2.16  
3.30

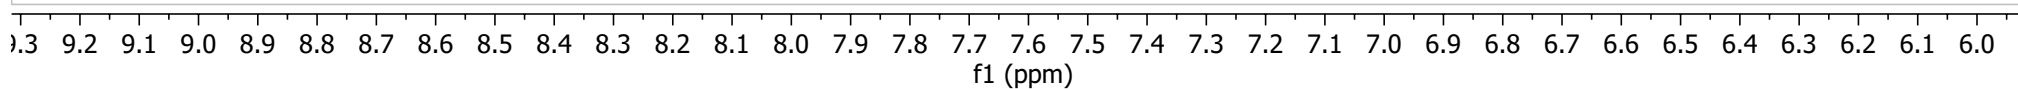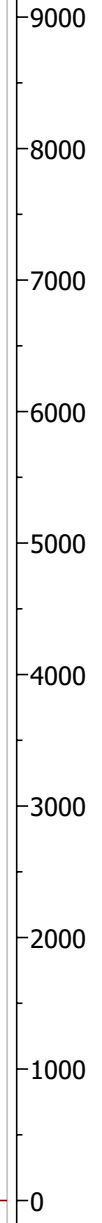

<sup>1</sup>H NMR 11h

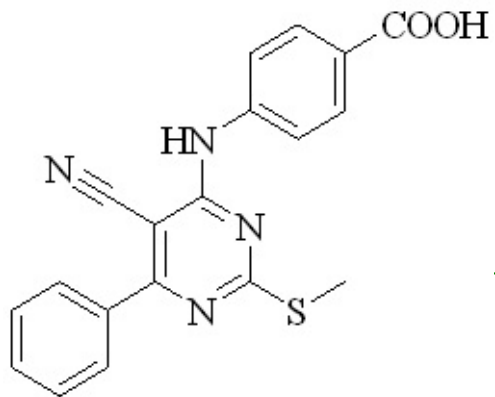

Compound 4

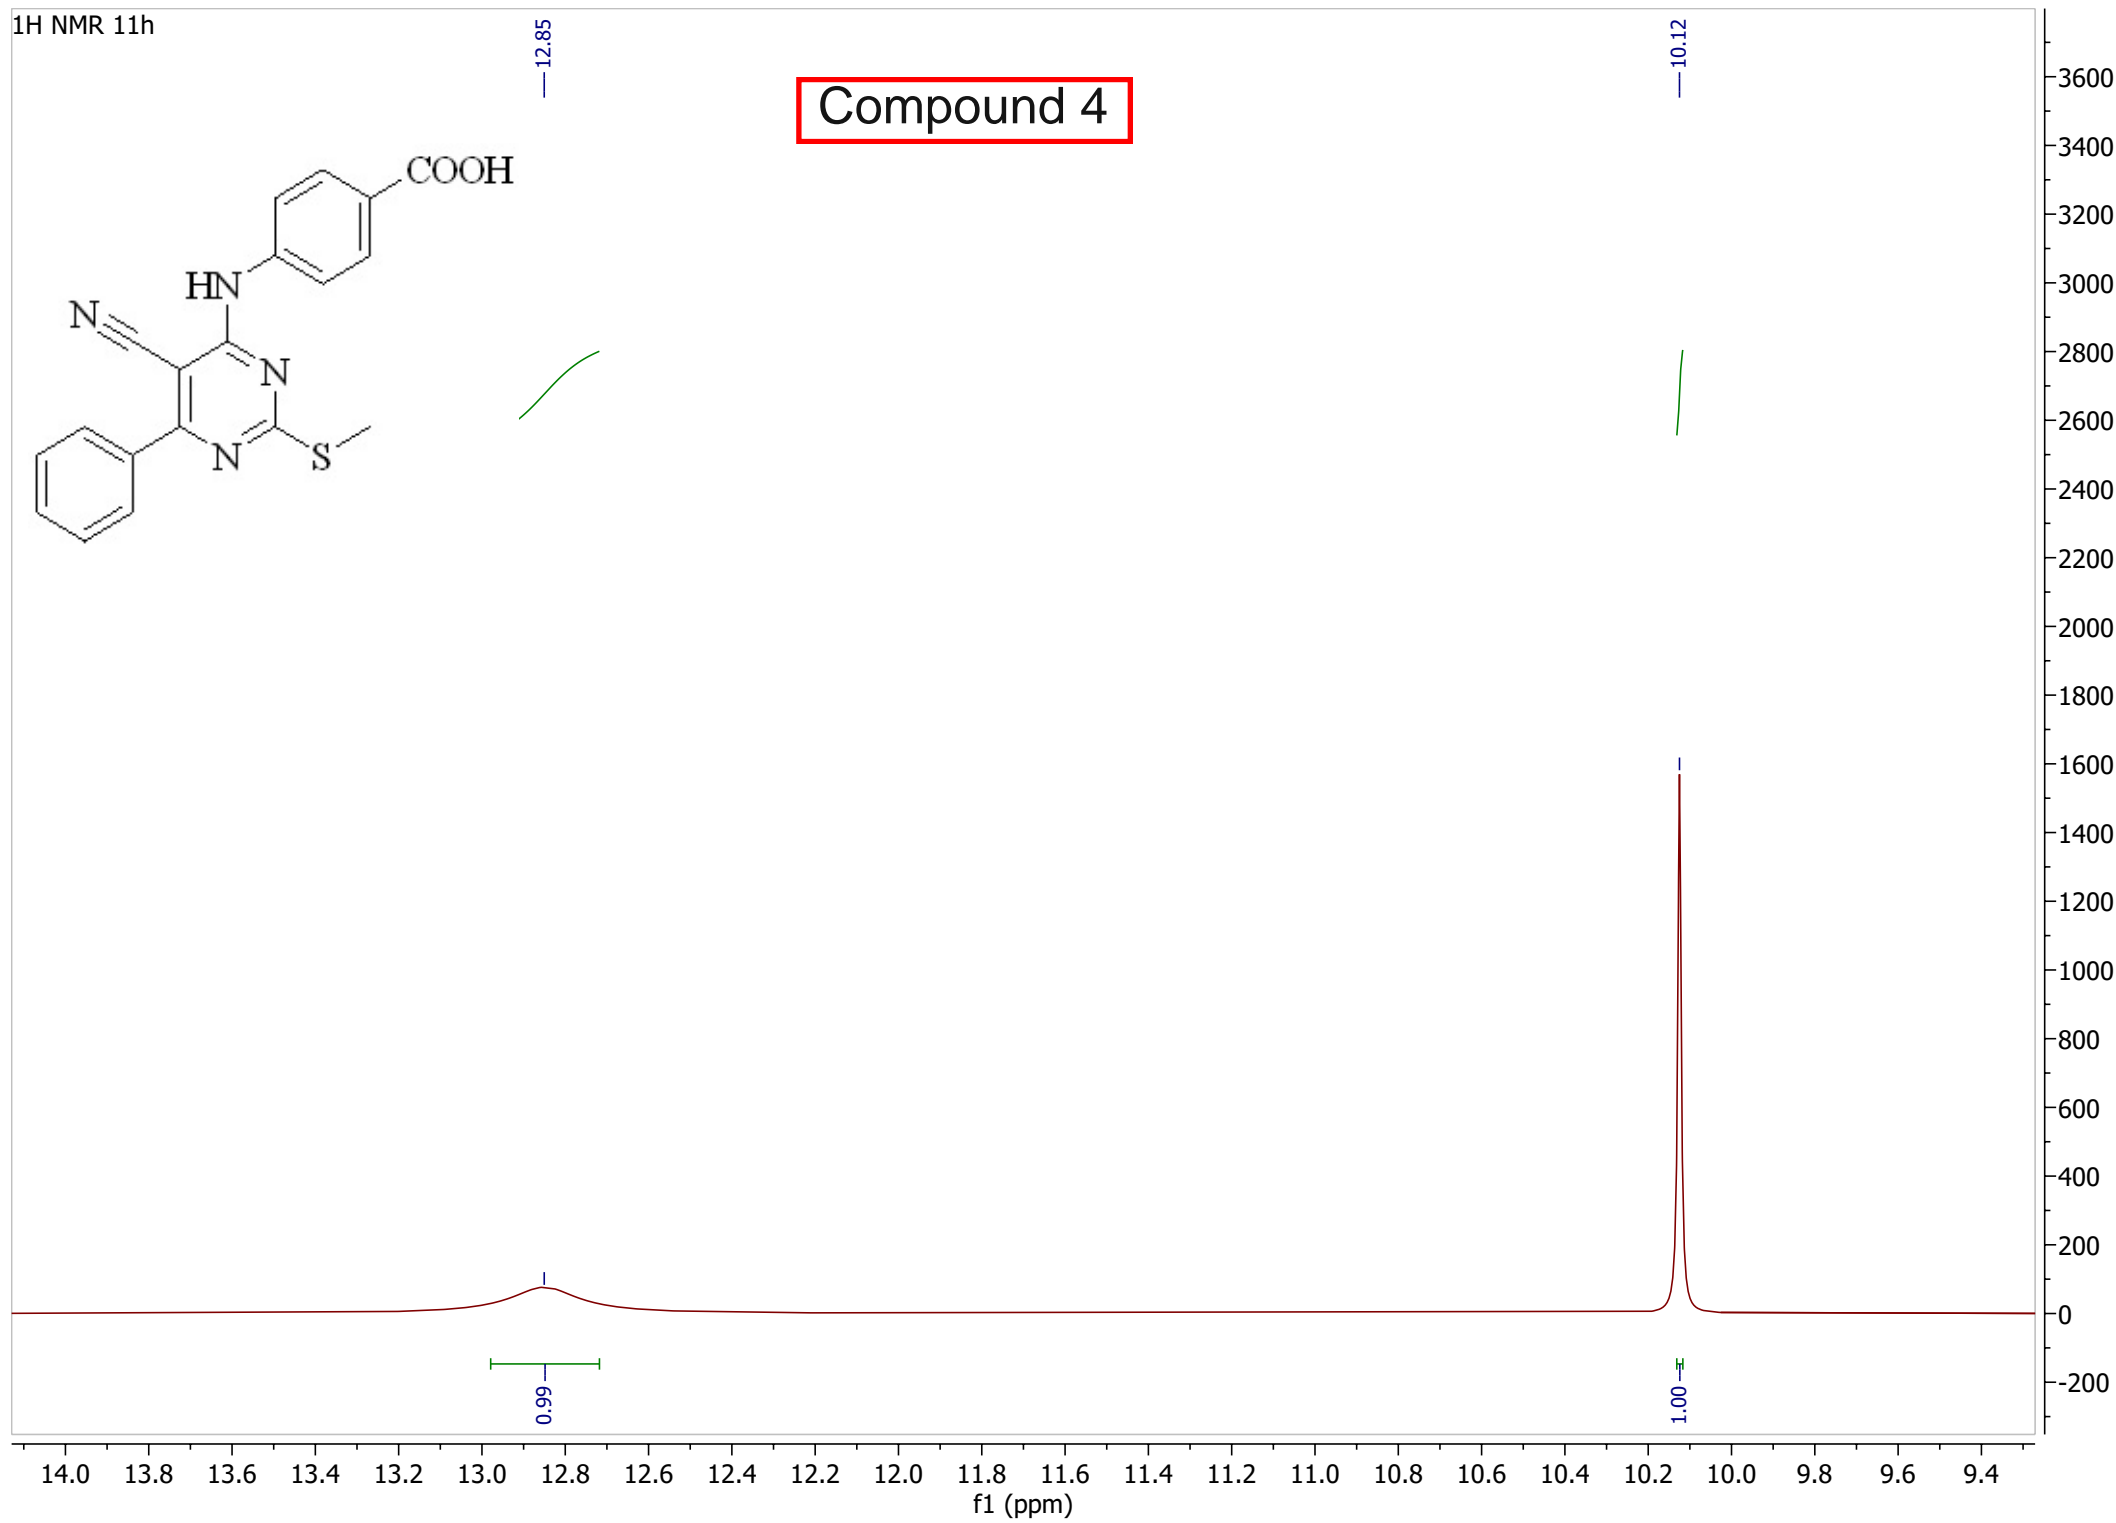

<sup>1</sup>H NMR (1h)

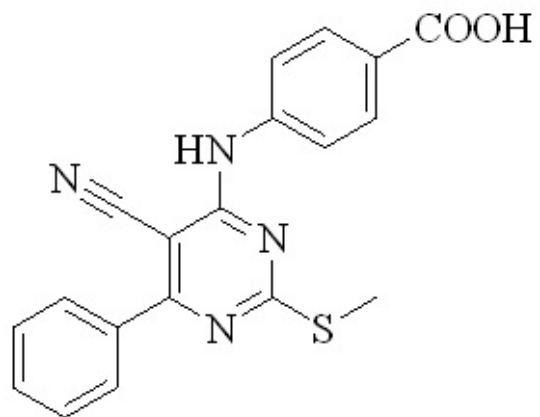

Compound 4

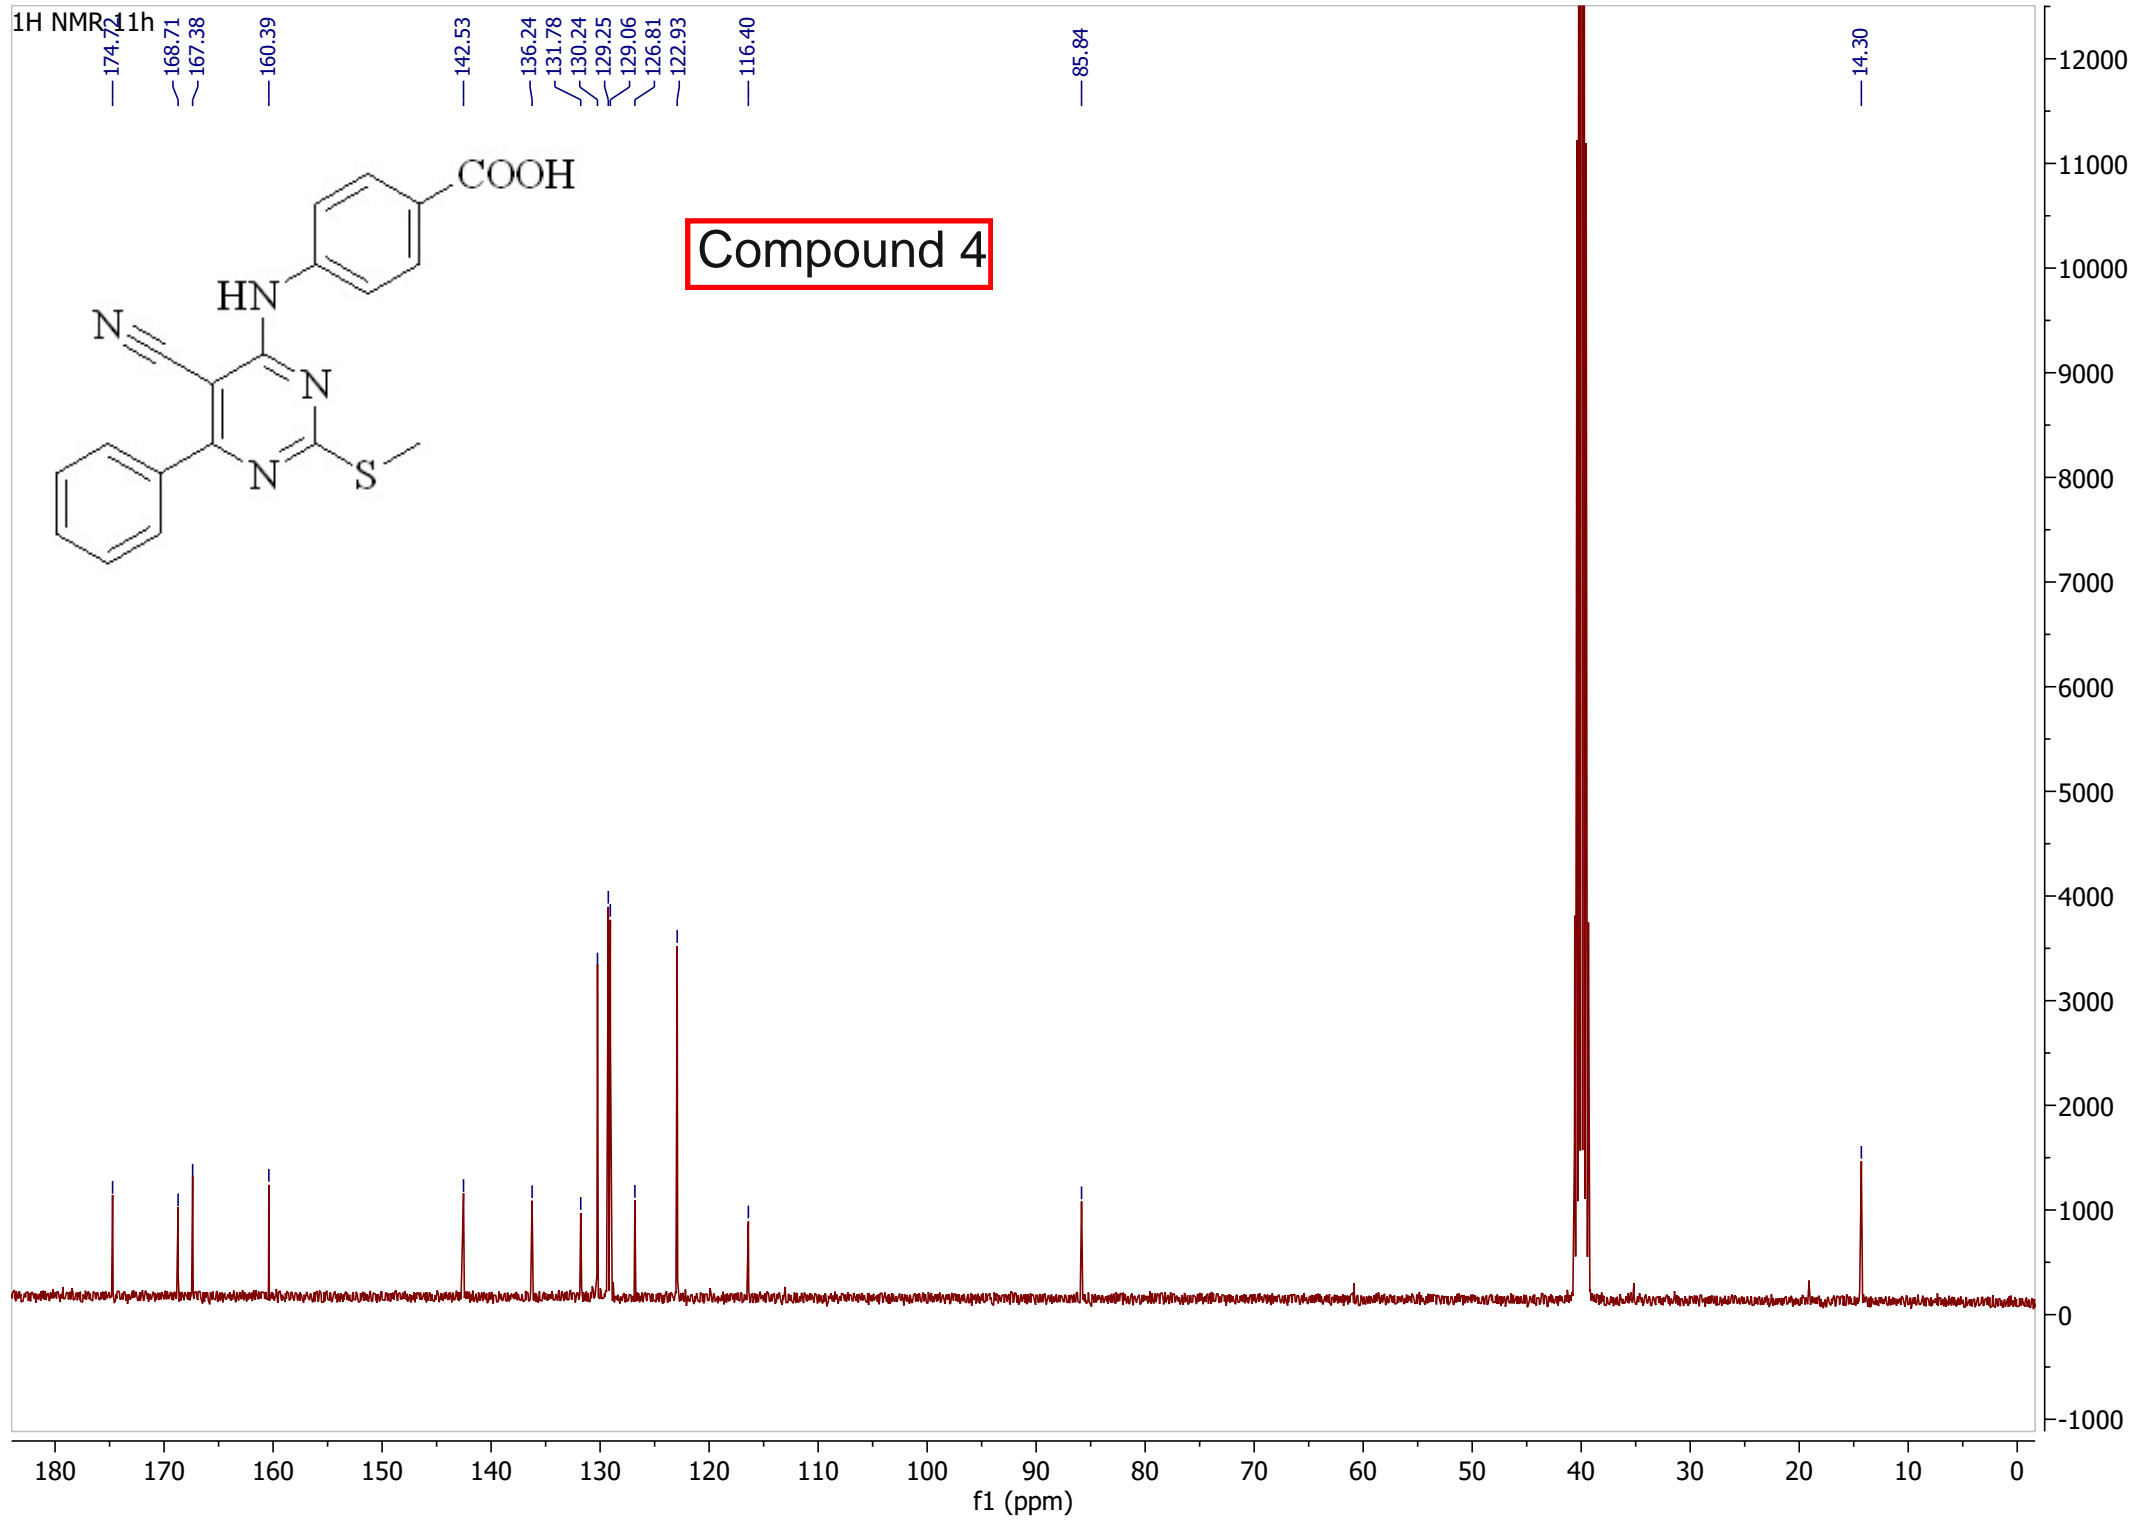

<sup>1</sup>H NMR 11h

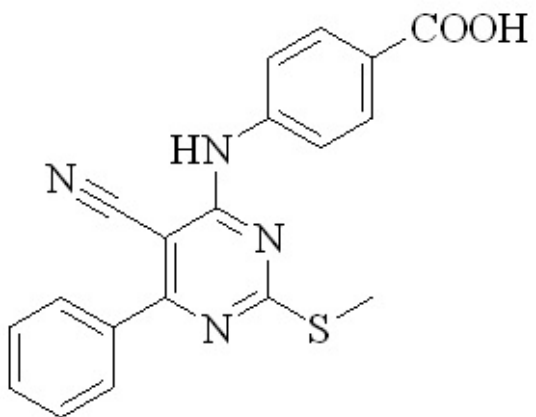

Compound 4

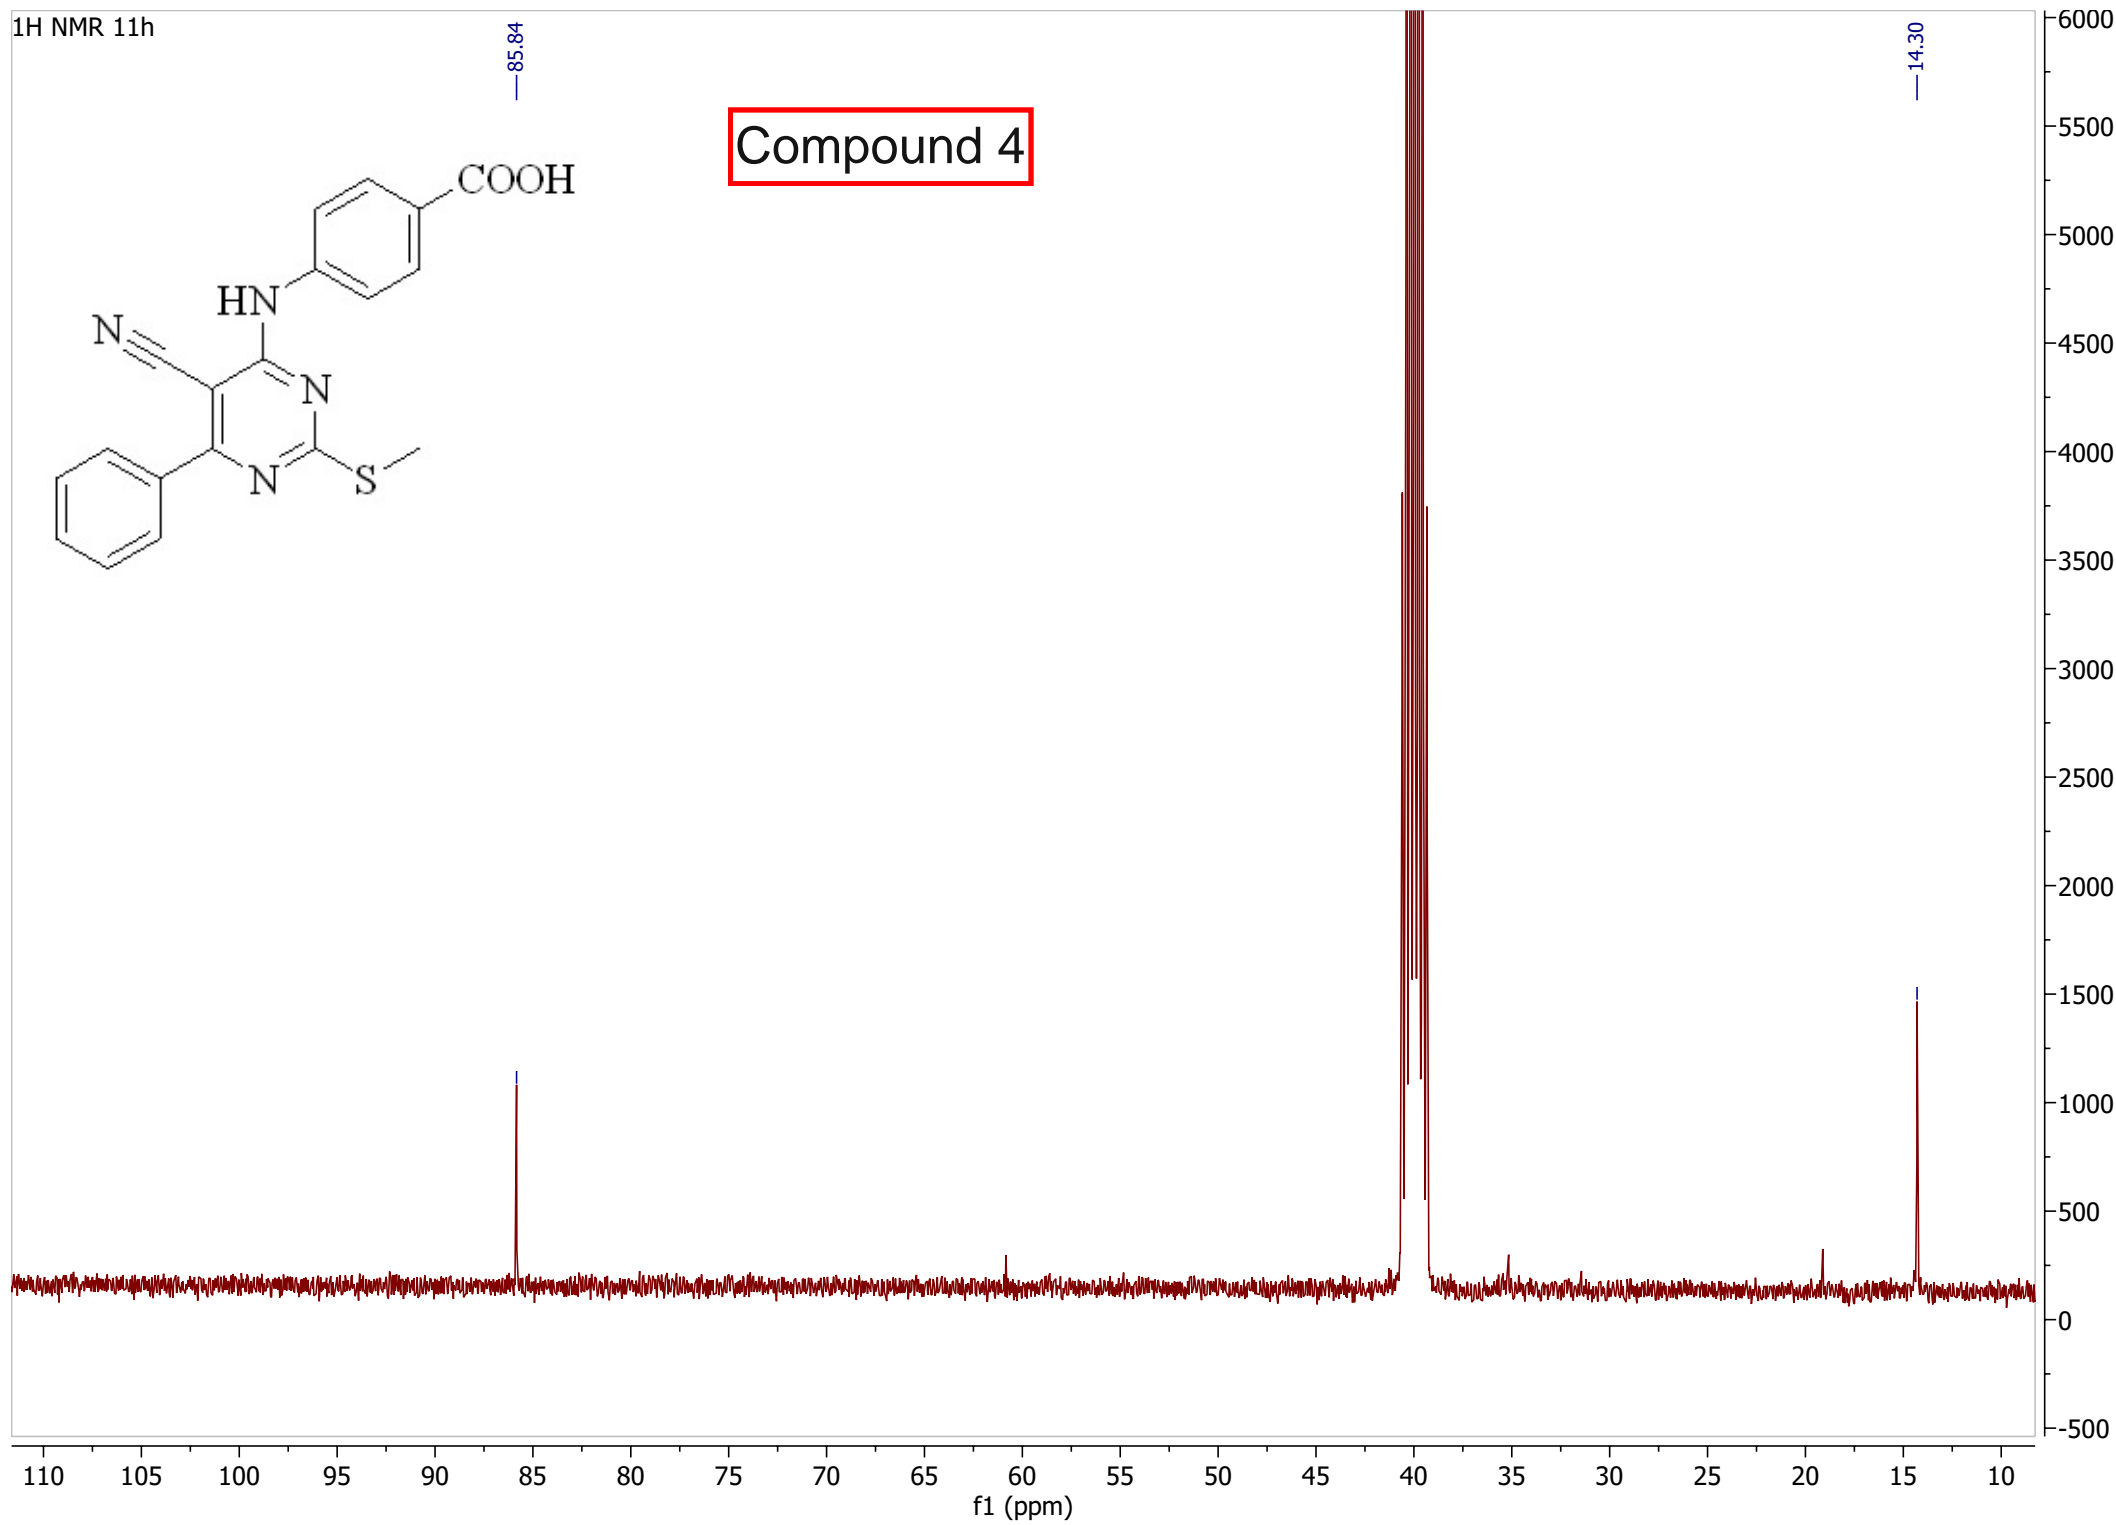

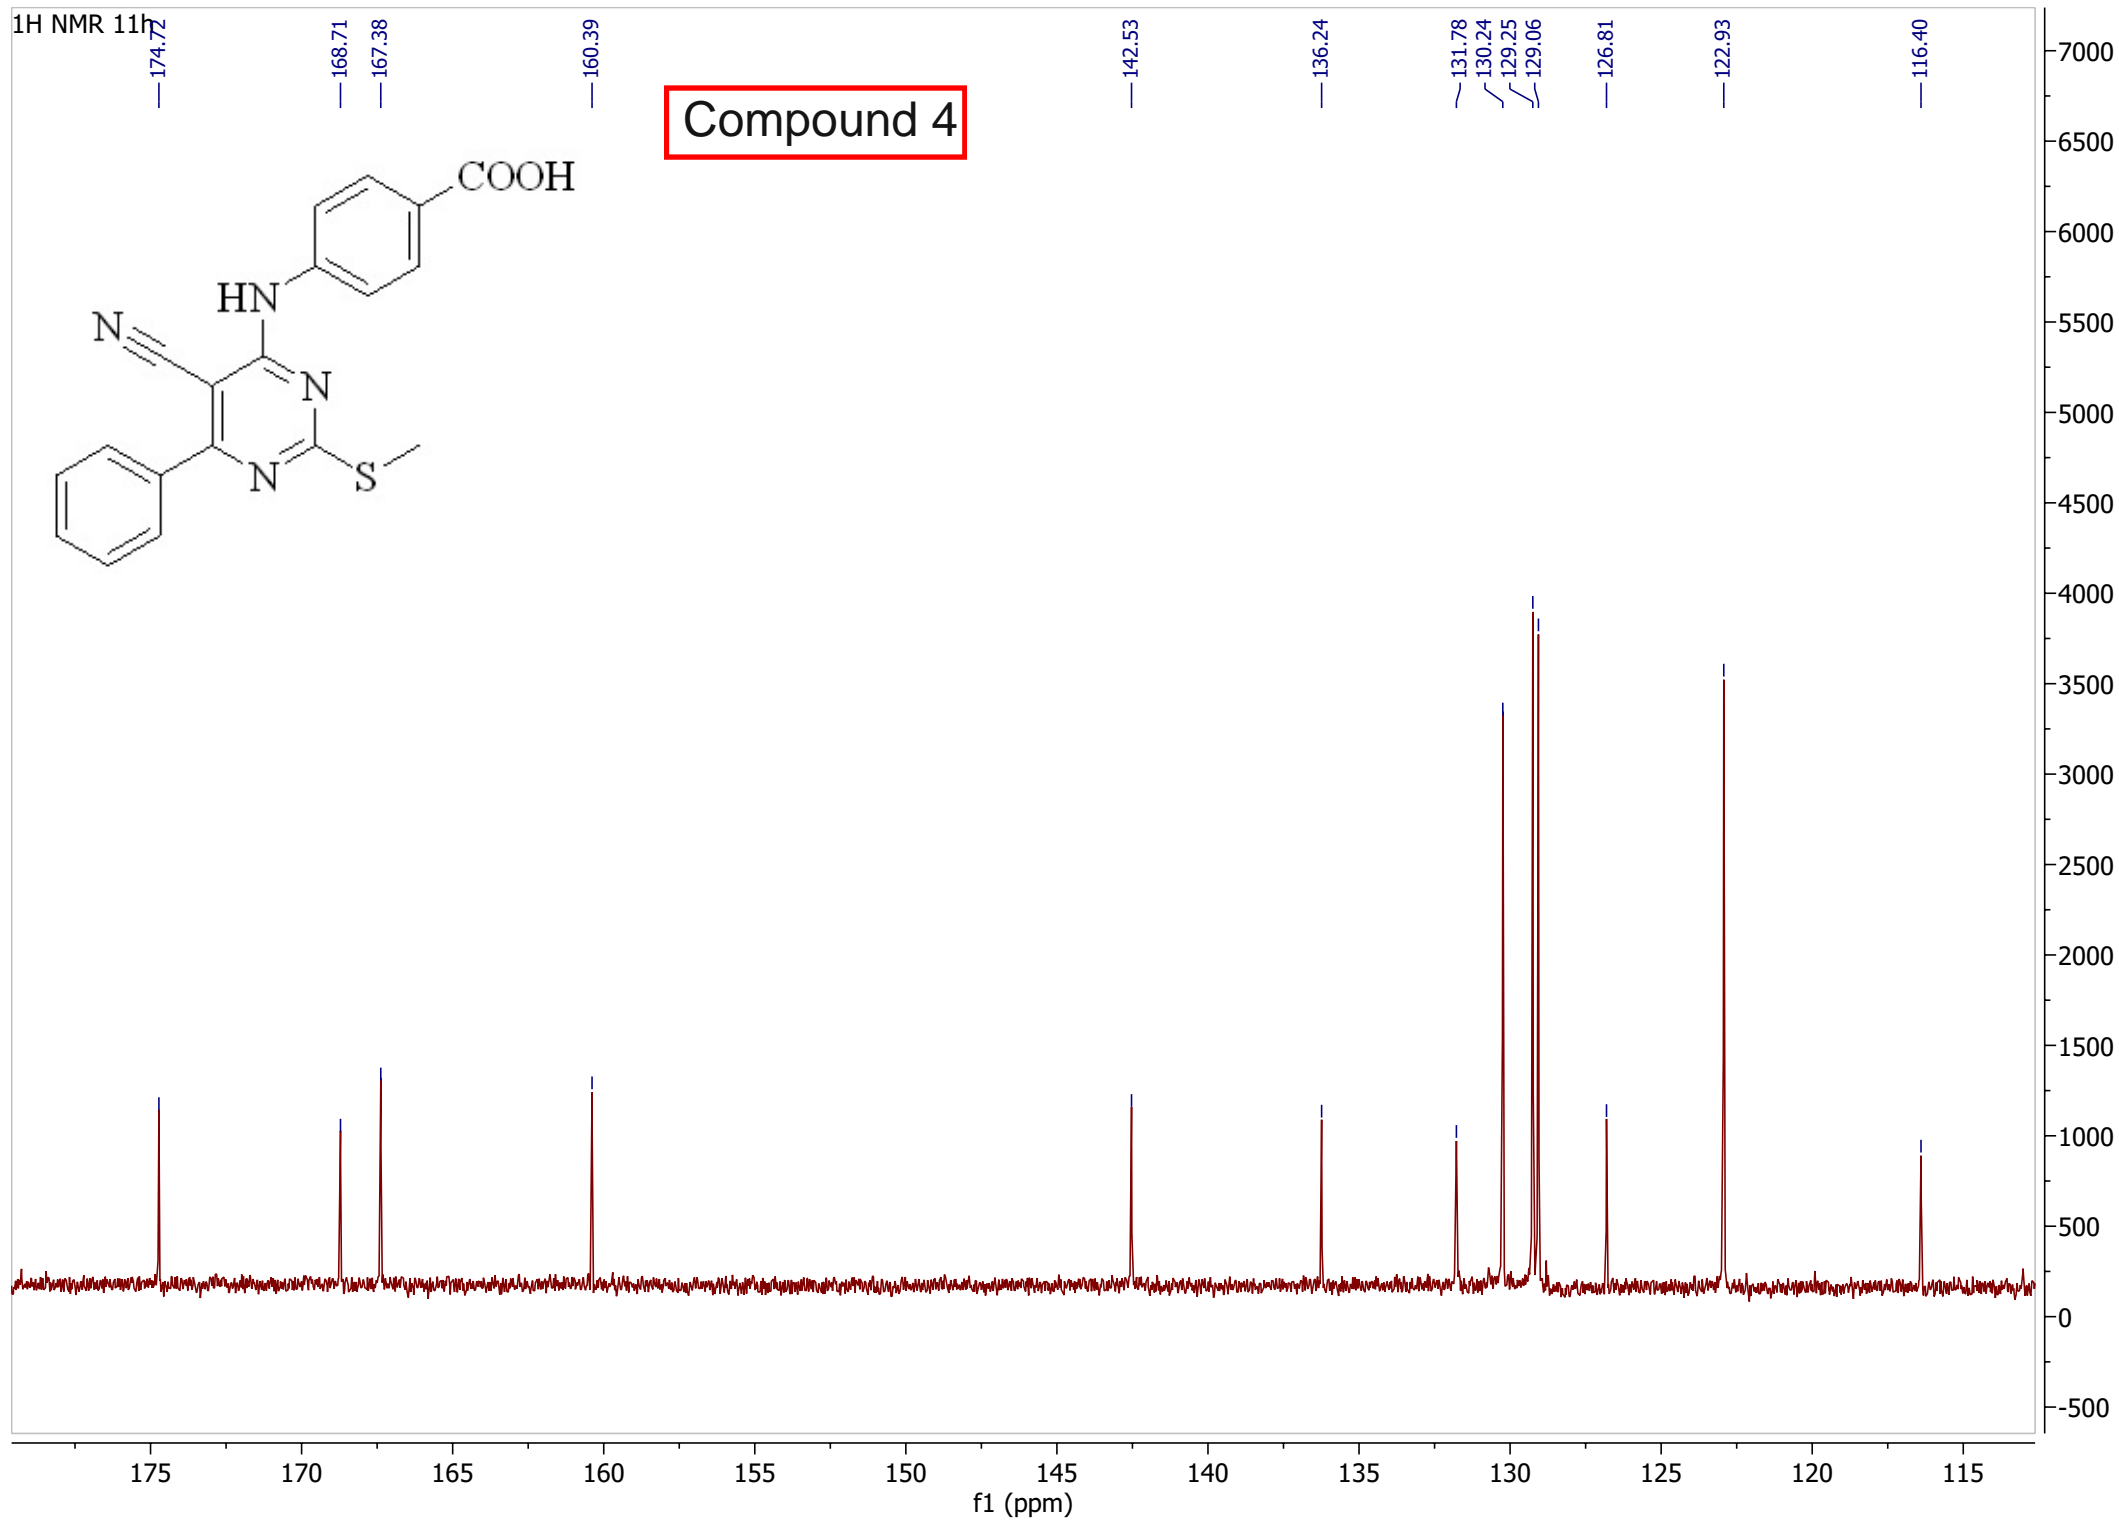

<sup>1</sup>H NMR 11h

Compound 5

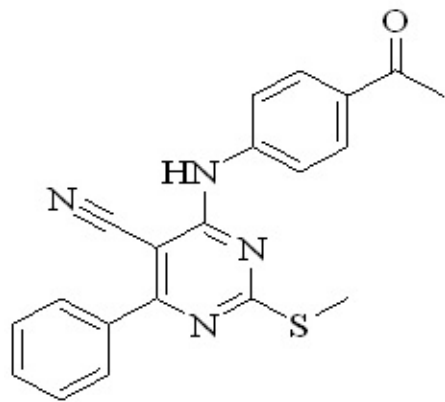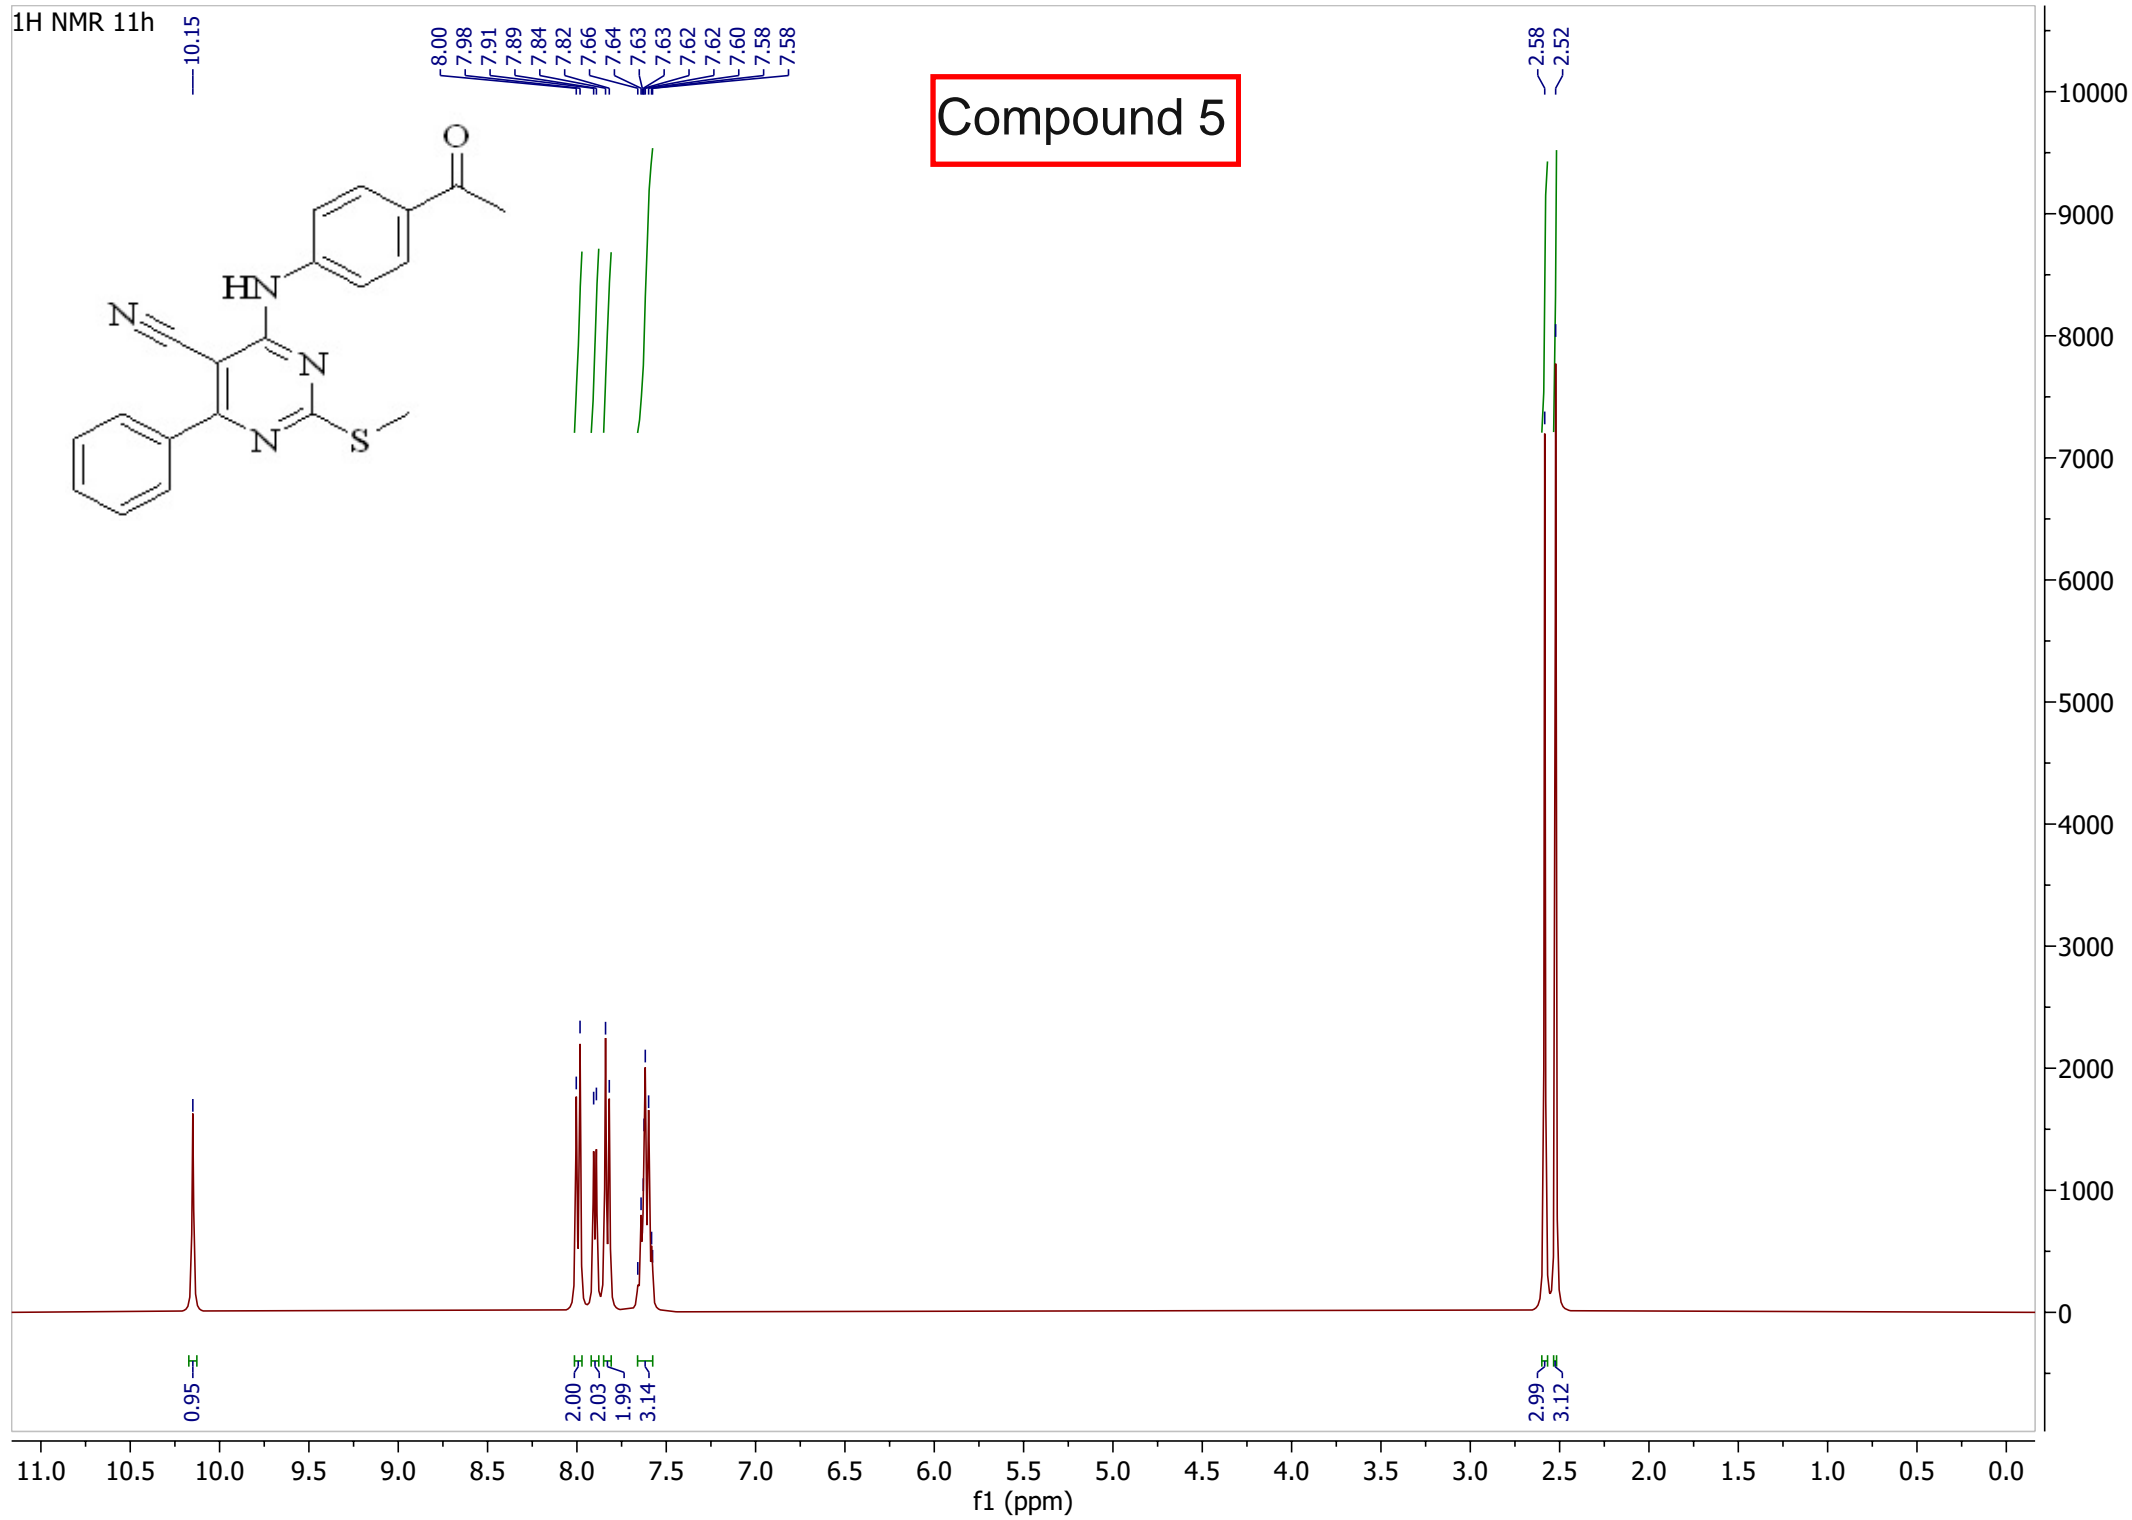

<sup>1</sup>H NMR 11h

Compound 5

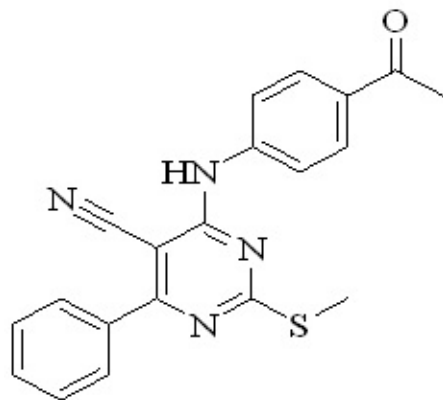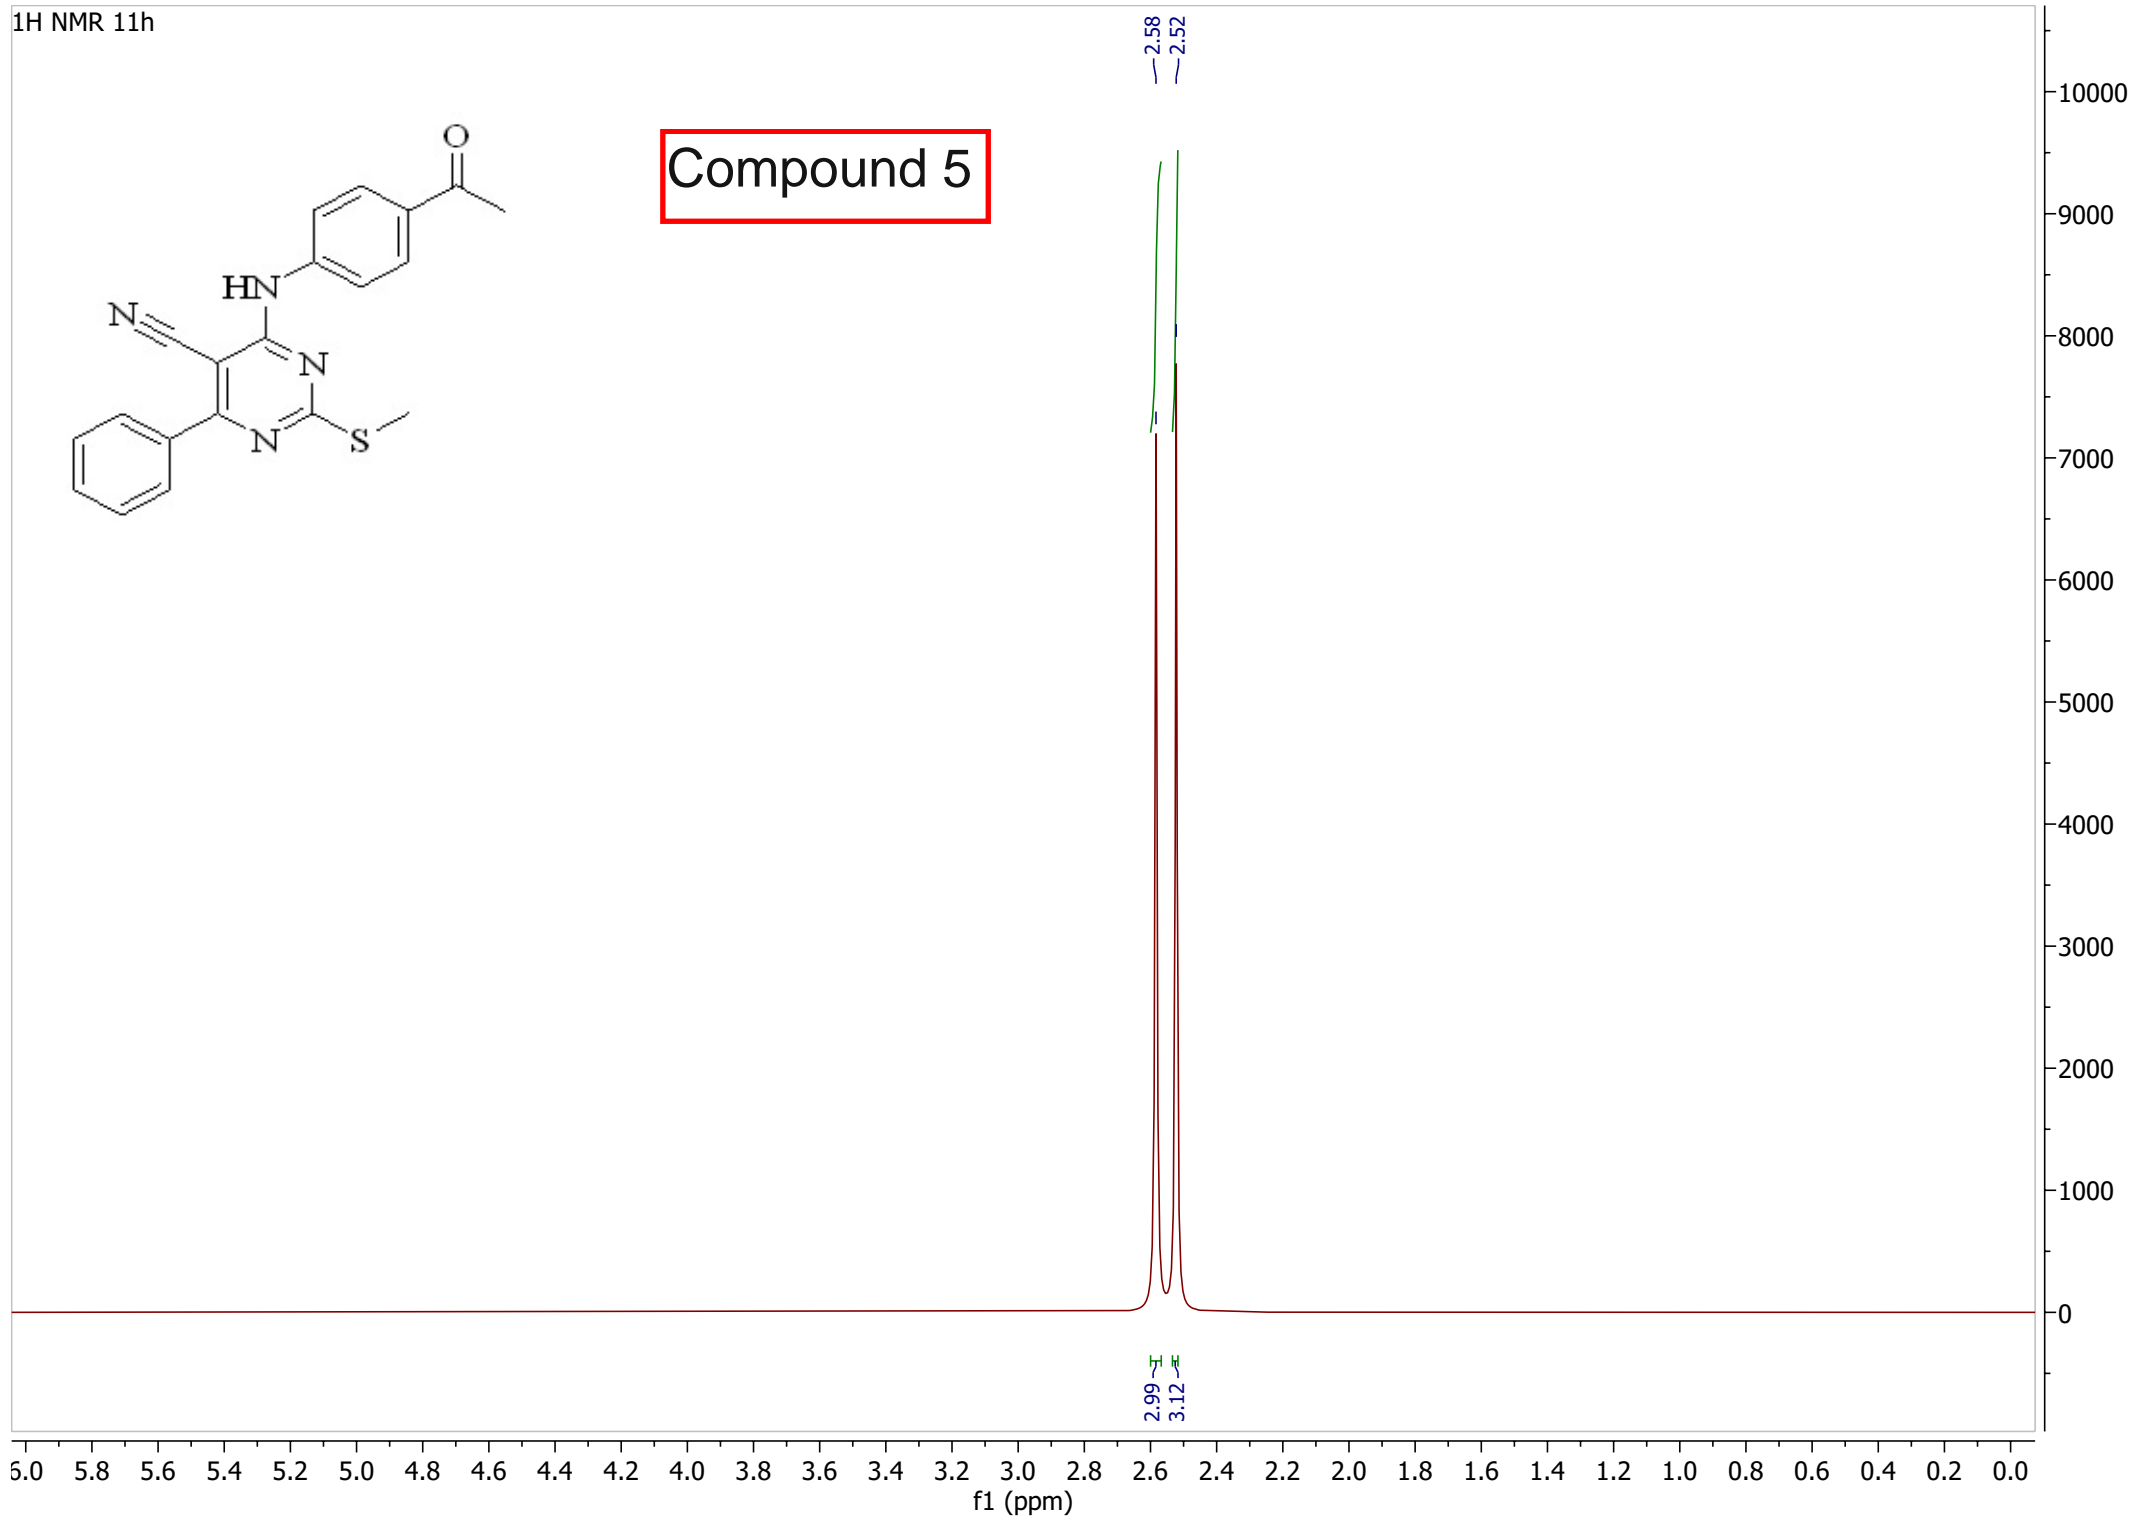



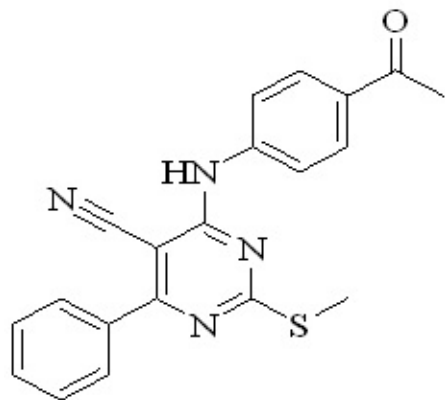

Compound 5

8.00  
7.98  
7.91  
7.89  
7.84  
7.82  
7.66  
7.64  
7.63  
7.63  
7.62  
7.62  
7.60  
7.58  
7.58

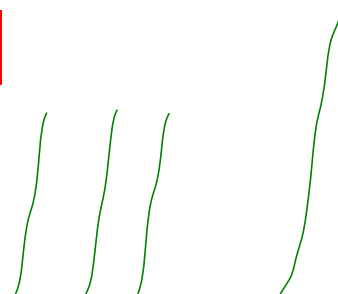

2.00  
2.03  
1.99  
3.14

9.1 9.0 8.9 8.8 8.7 8.6 8.5 8.4 8.3 8.2 8.1 8.0 7.9 7.8 7.7 7.6 7.5 7.4 7.3 7.2 7.1 7.0 6.9 6.8 6.7 6.6 6.5  
f1 (ppm)

10000  
9000  
8000  
7000  
6000  
5000  
4000  
3000  
2000  
1000  
0

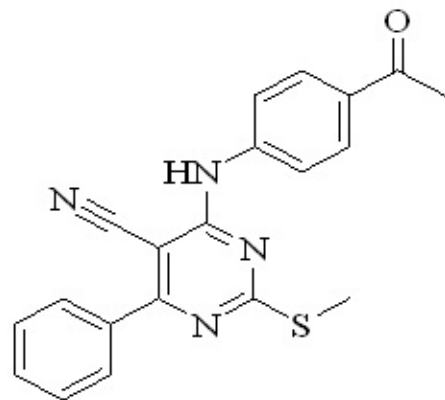

Compound 5

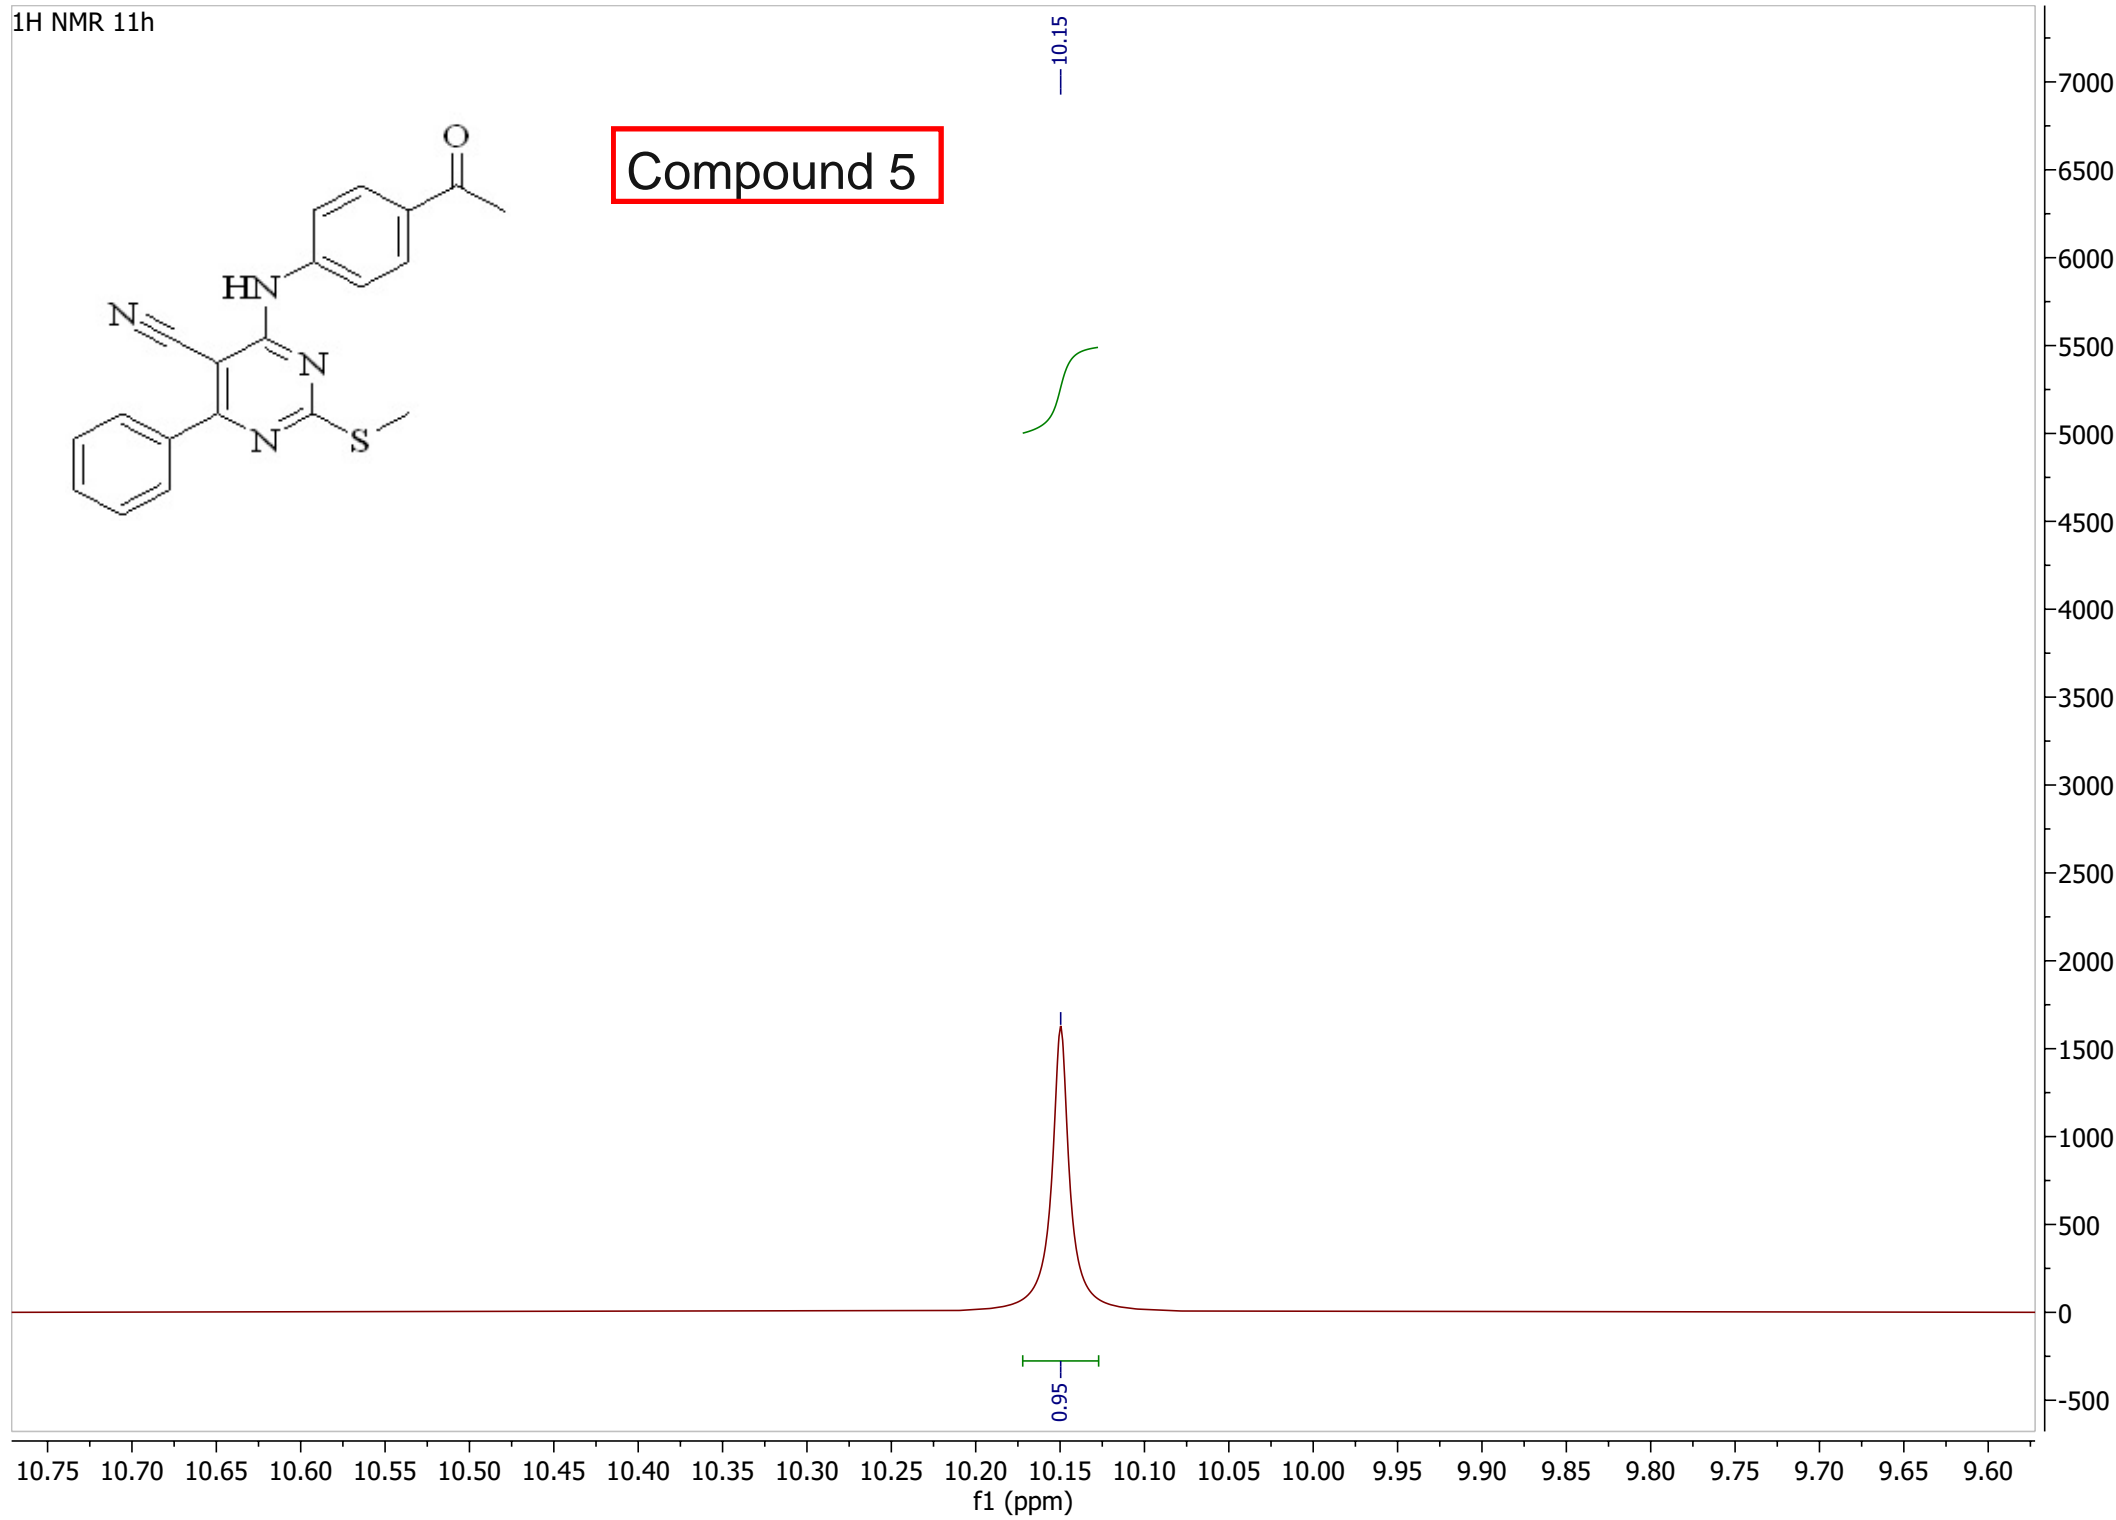

<sup>1</sup>H NMR 11h

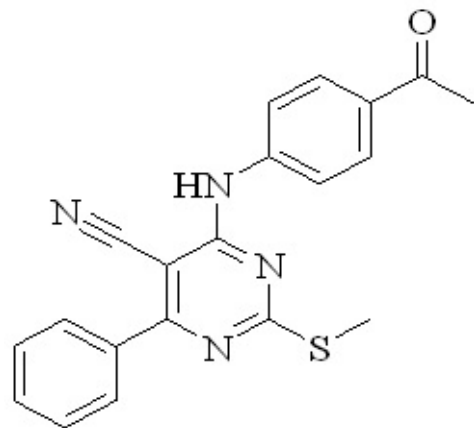

Compound 5

—197.21  
—174.73  
—168.73  
—160.34

142.88  
136.23  
133.11  
131.80  
129.30  
129.26  
129.07  
—122.73  
—116.40

—85.99

—27.05

—14.34

210 200 190 180 170 160 150 140 130 120 110 100 90 80 70 60 50 40 30 20 10 0 -10

f1 (ppm)

11000  
10000  
9000  
8000  
7000  
6000  
5000  
4000  
3000  
2000  
1000  
0  
-1000

<sup>1</sup>H NMR 11h

Compound 5

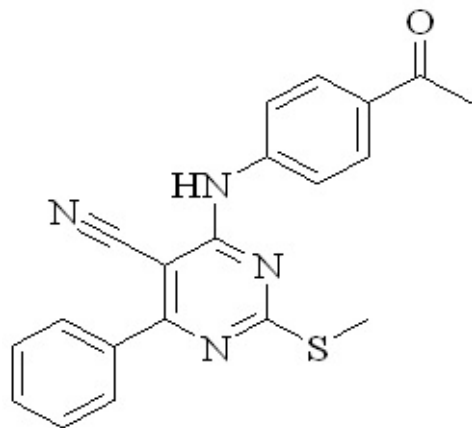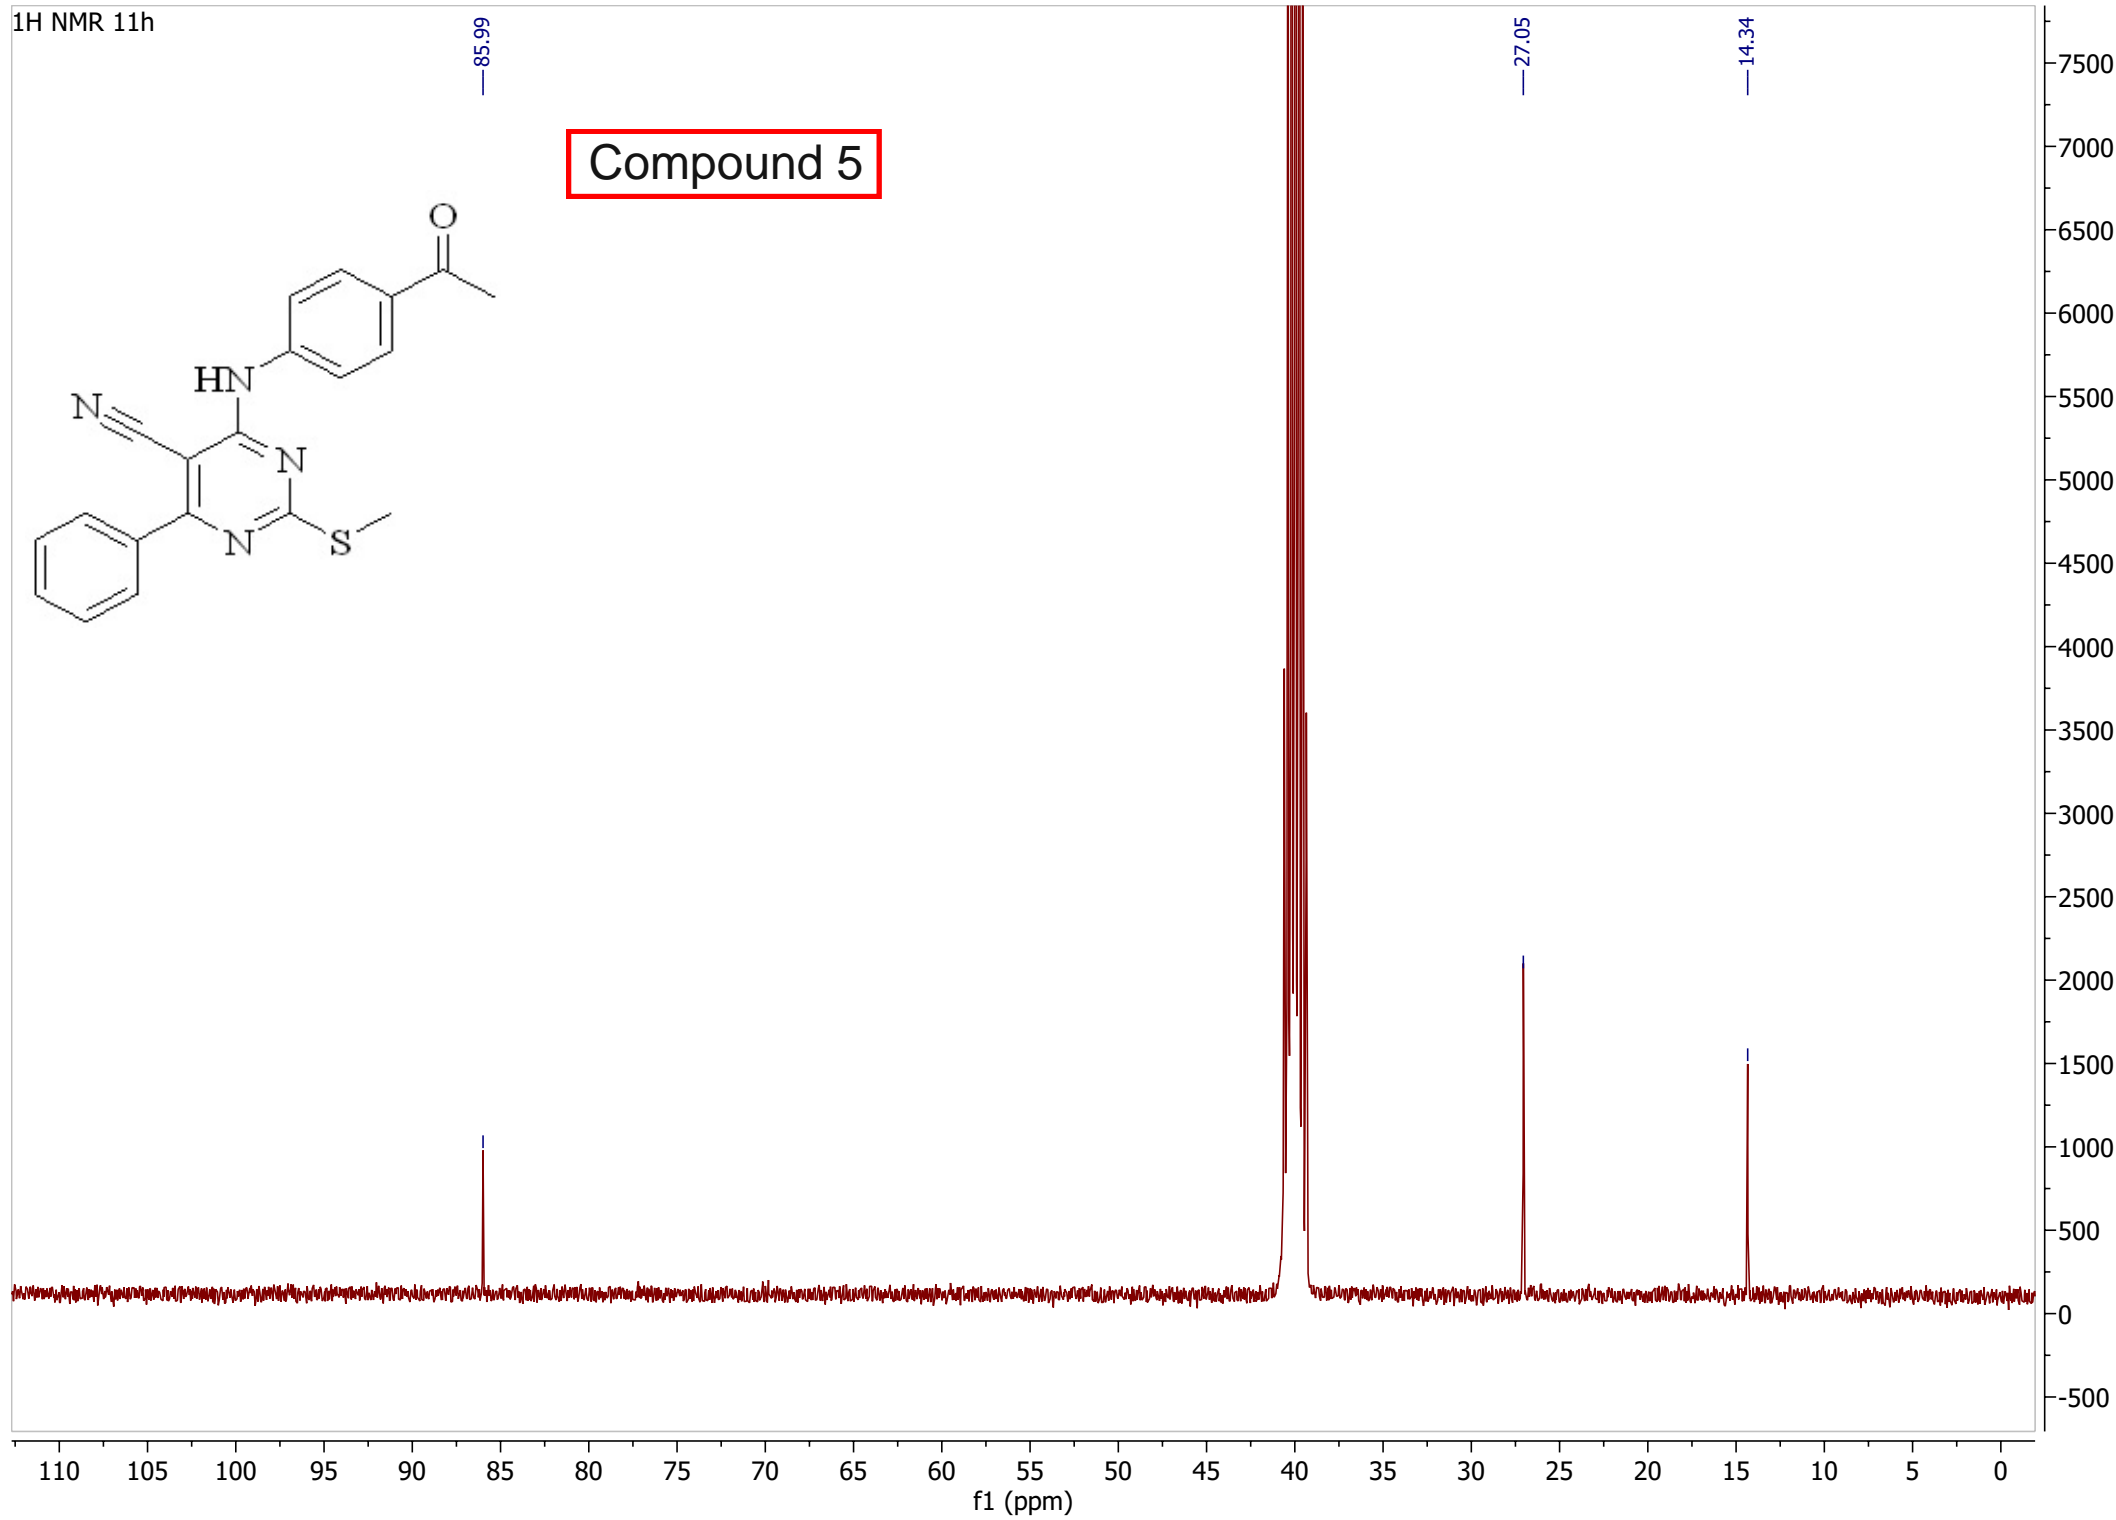

<sup>13</sup>C NMR 11h

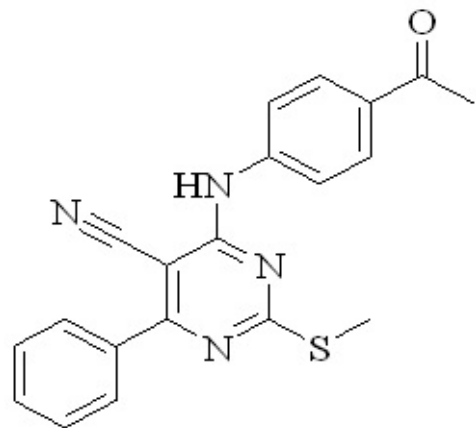

Compound 5

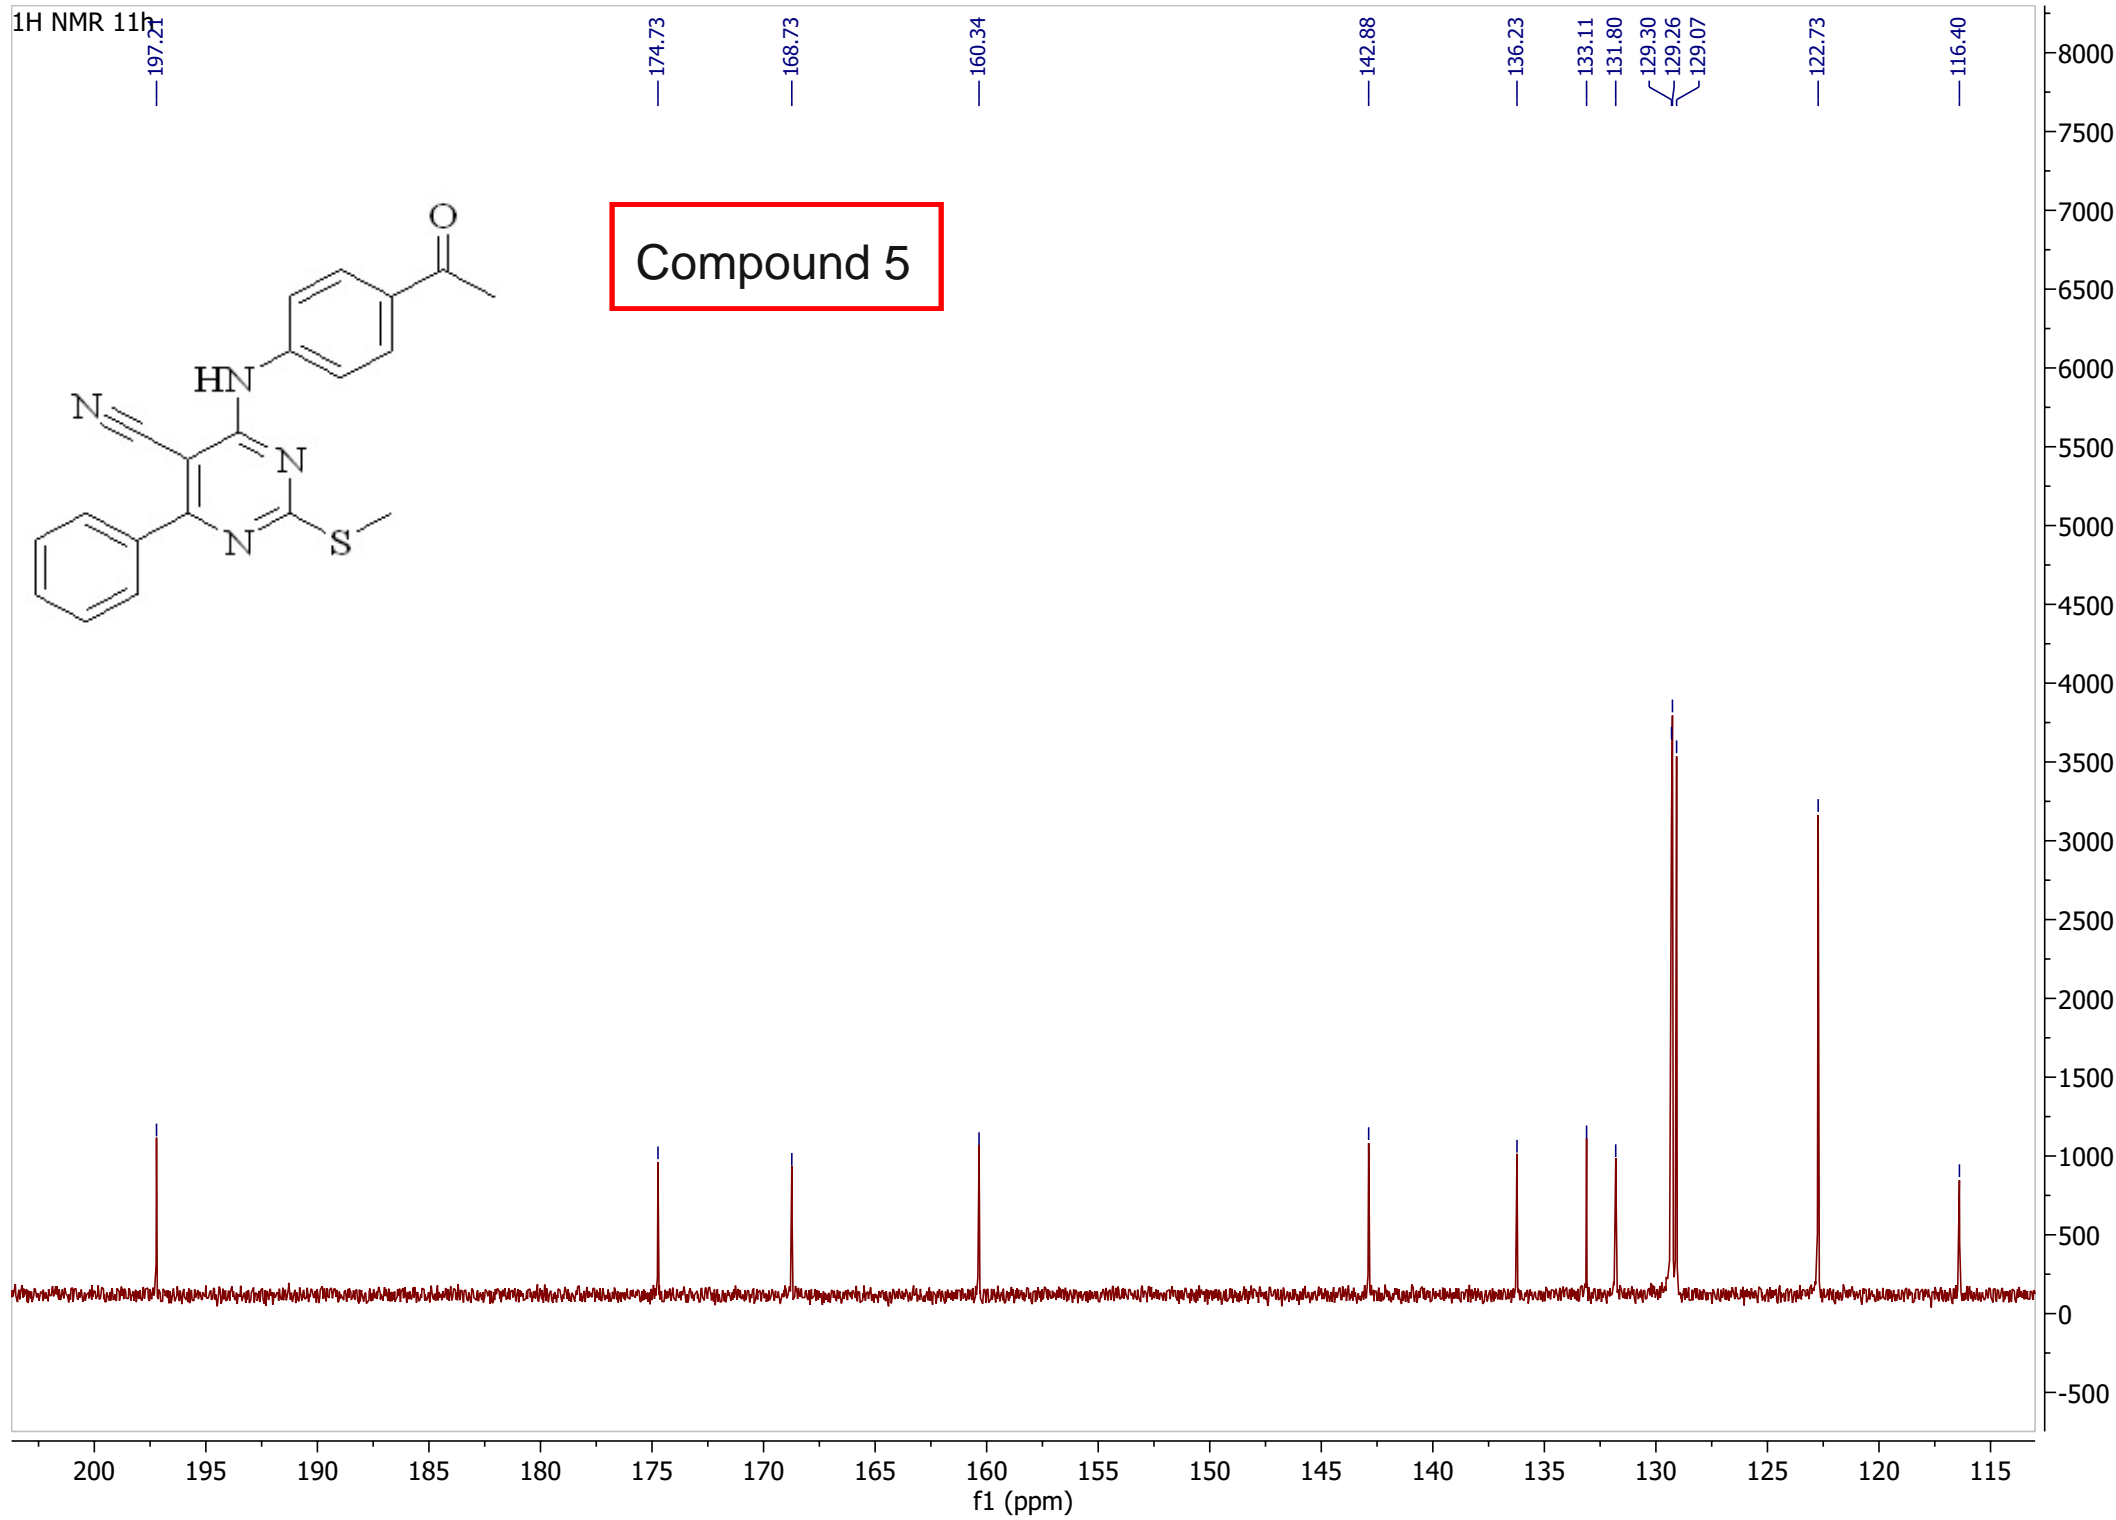

<sup>1</sup>H NMR 11h

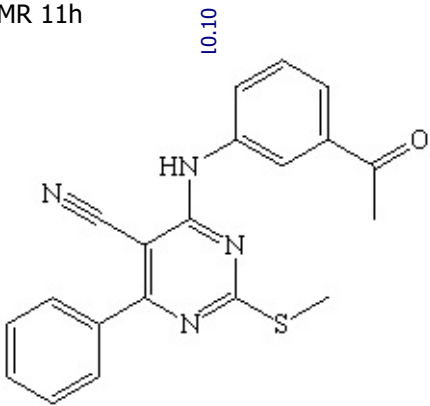

10.10

7.94  
7.92  
7.85  
7.83  
7.83  
7.76  
7.74  
7.57  
7.56  
7.54  
7.53

Compound 6

2.53  
2.45

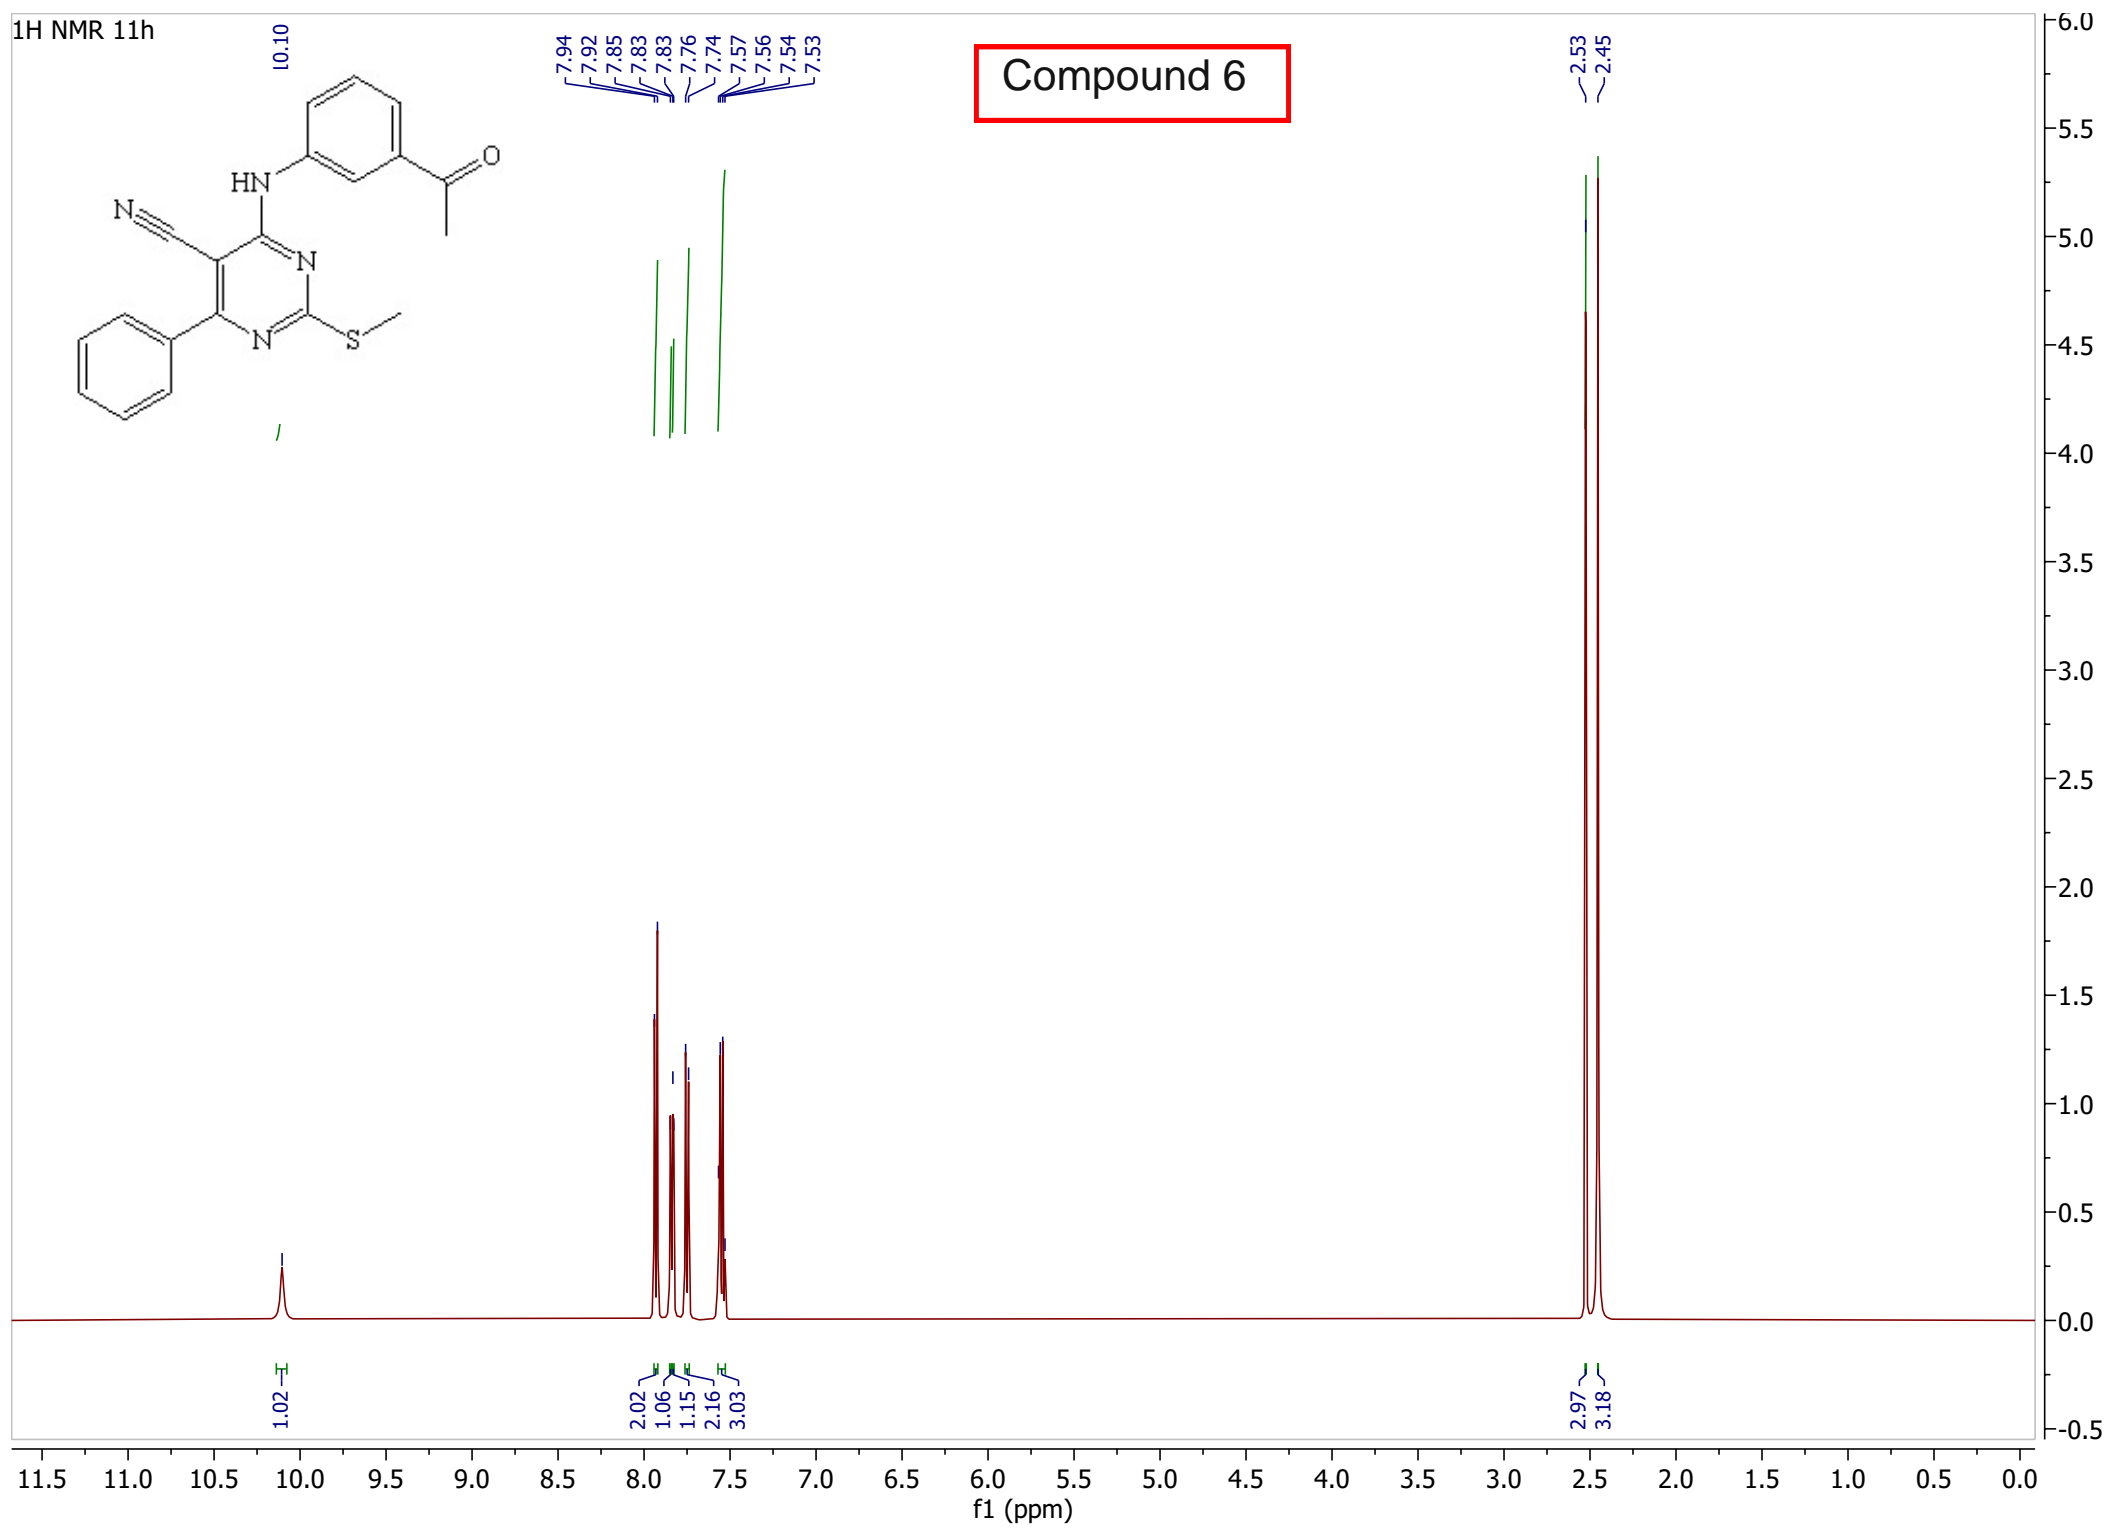

f1 (ppm)

<sup>1</sup>H NMR 11h

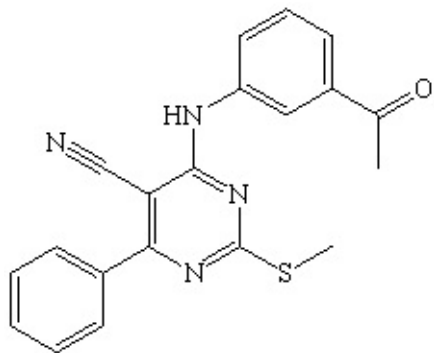

Compound 6

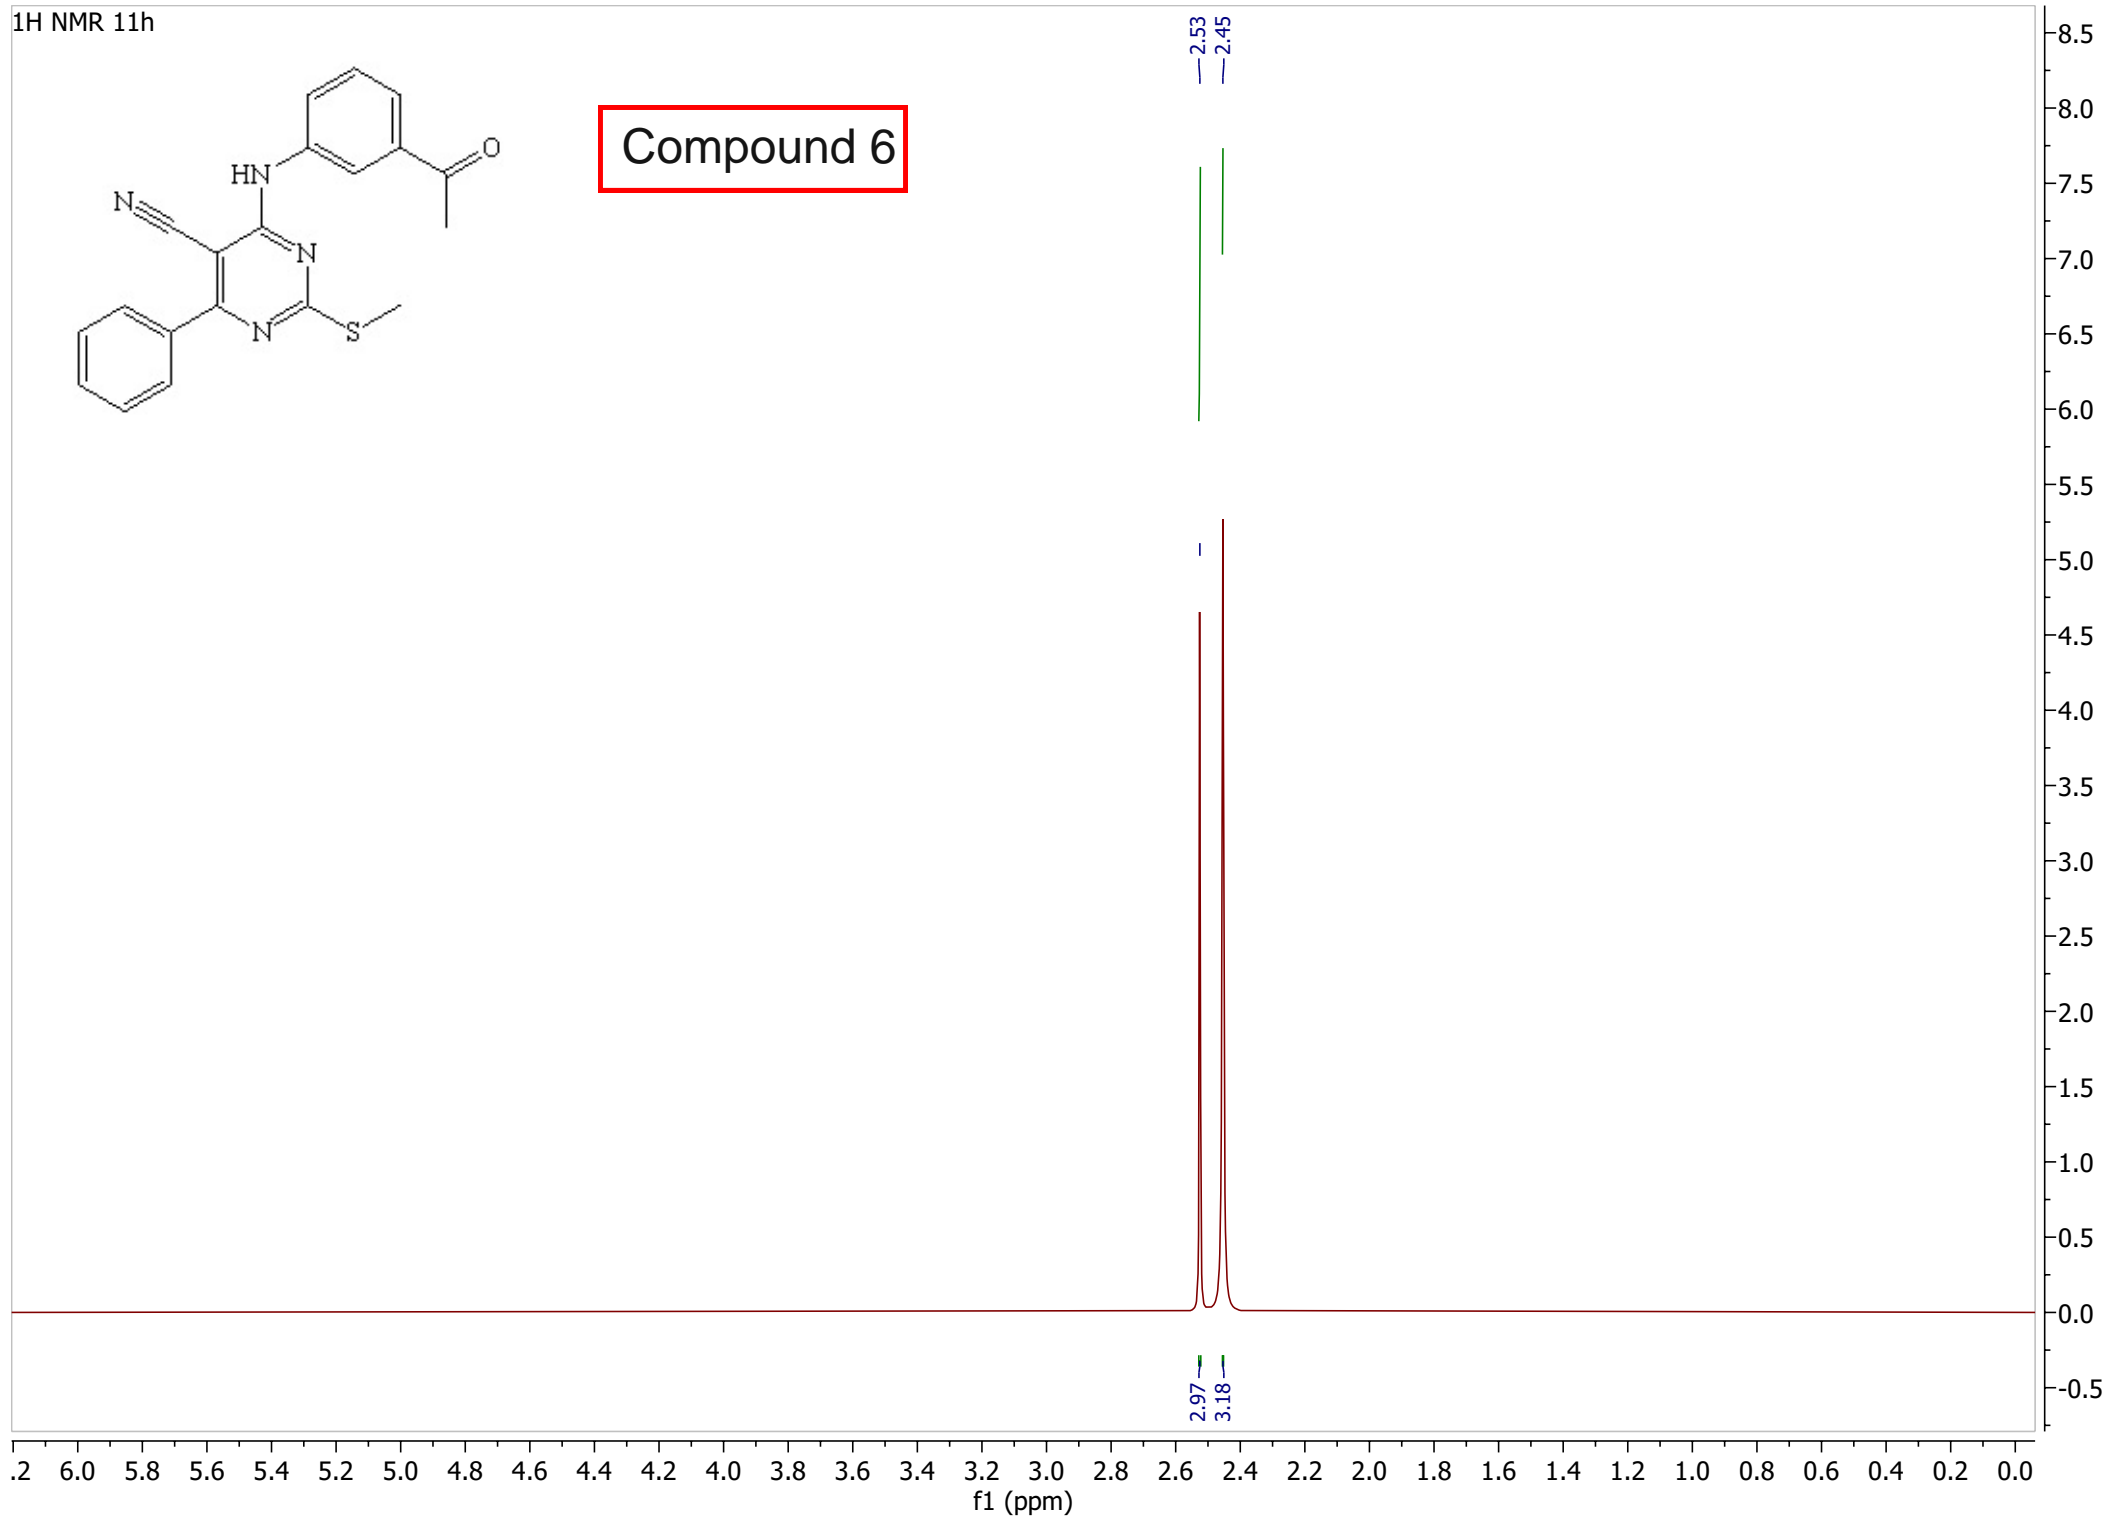

<sup>1</sup>H NMR 11h



Compound 6

7.94  
7.92  
7.85  
7.83  
7.83  
7.76  
7.74  
7.57  
7.56  
7.54  
7.53

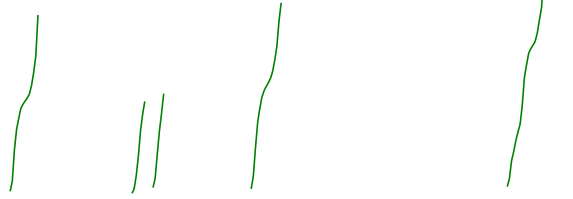

2.02  
1.06  
1.15  
2.16  
3.03

8.5 8.4 8.3 8.2 8.1 8.0 7.9 7.8 7.7 7.6 7.5 7.4 7.3 7.2 7.1

f1 (ppm)

7.0  
6.5  
6.0  
5.5  
5.0  
4.5  
4.0  
3.5  
3.0  
2.5  
2.0  
1.5  
1.0  
0.5  
0.0  
-0.5



<sup>1</sup>H NMR 11h

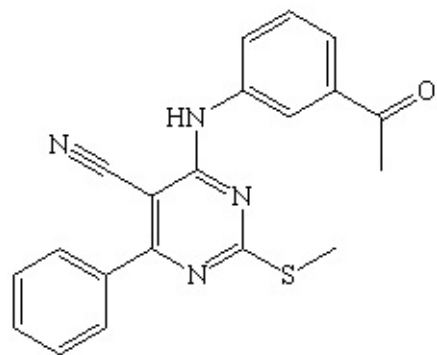

Compound 6

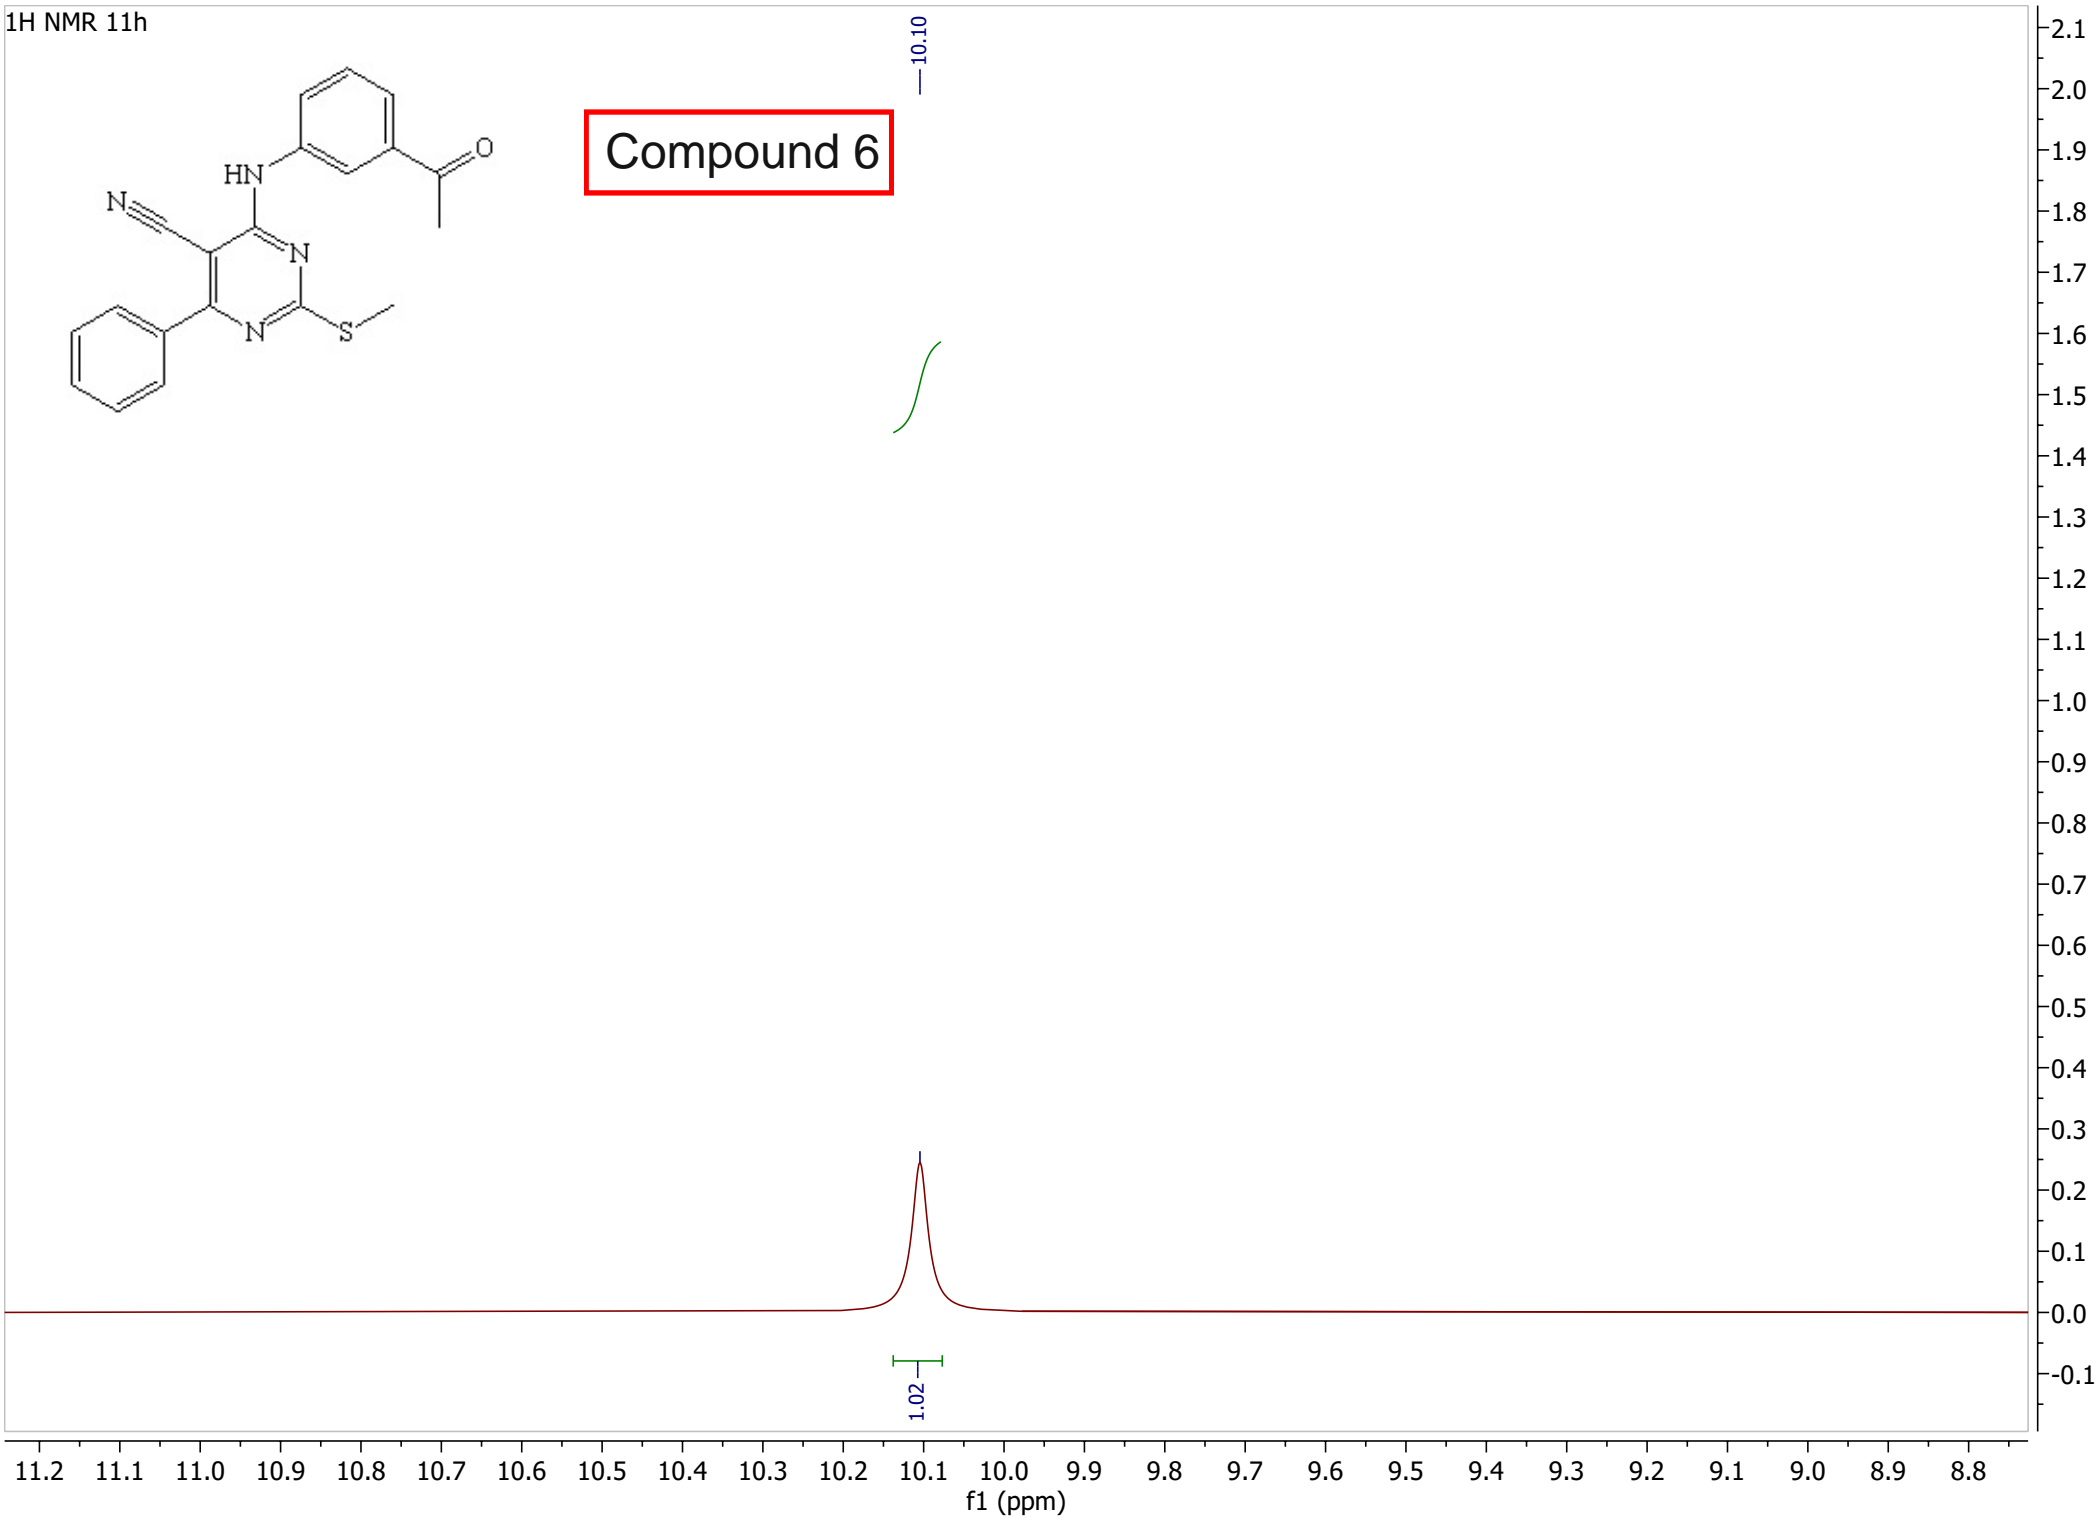

<sup>1</sup>H NMR 11h

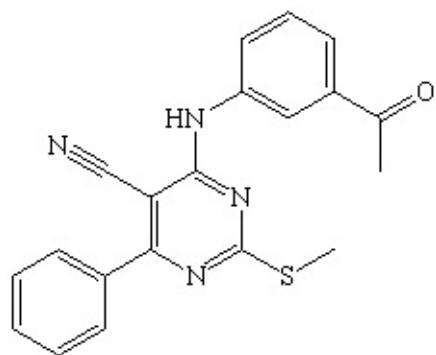

Compound 6

— 197.26 — 174.64 — 168.73 — 160.40 — 142.76 — 136.38 — 132.96 — 131.80 — 129.36 — 129.30 — 129.12 — 122.83 — 116.65

— 86.16

— 27.11

— 14.37

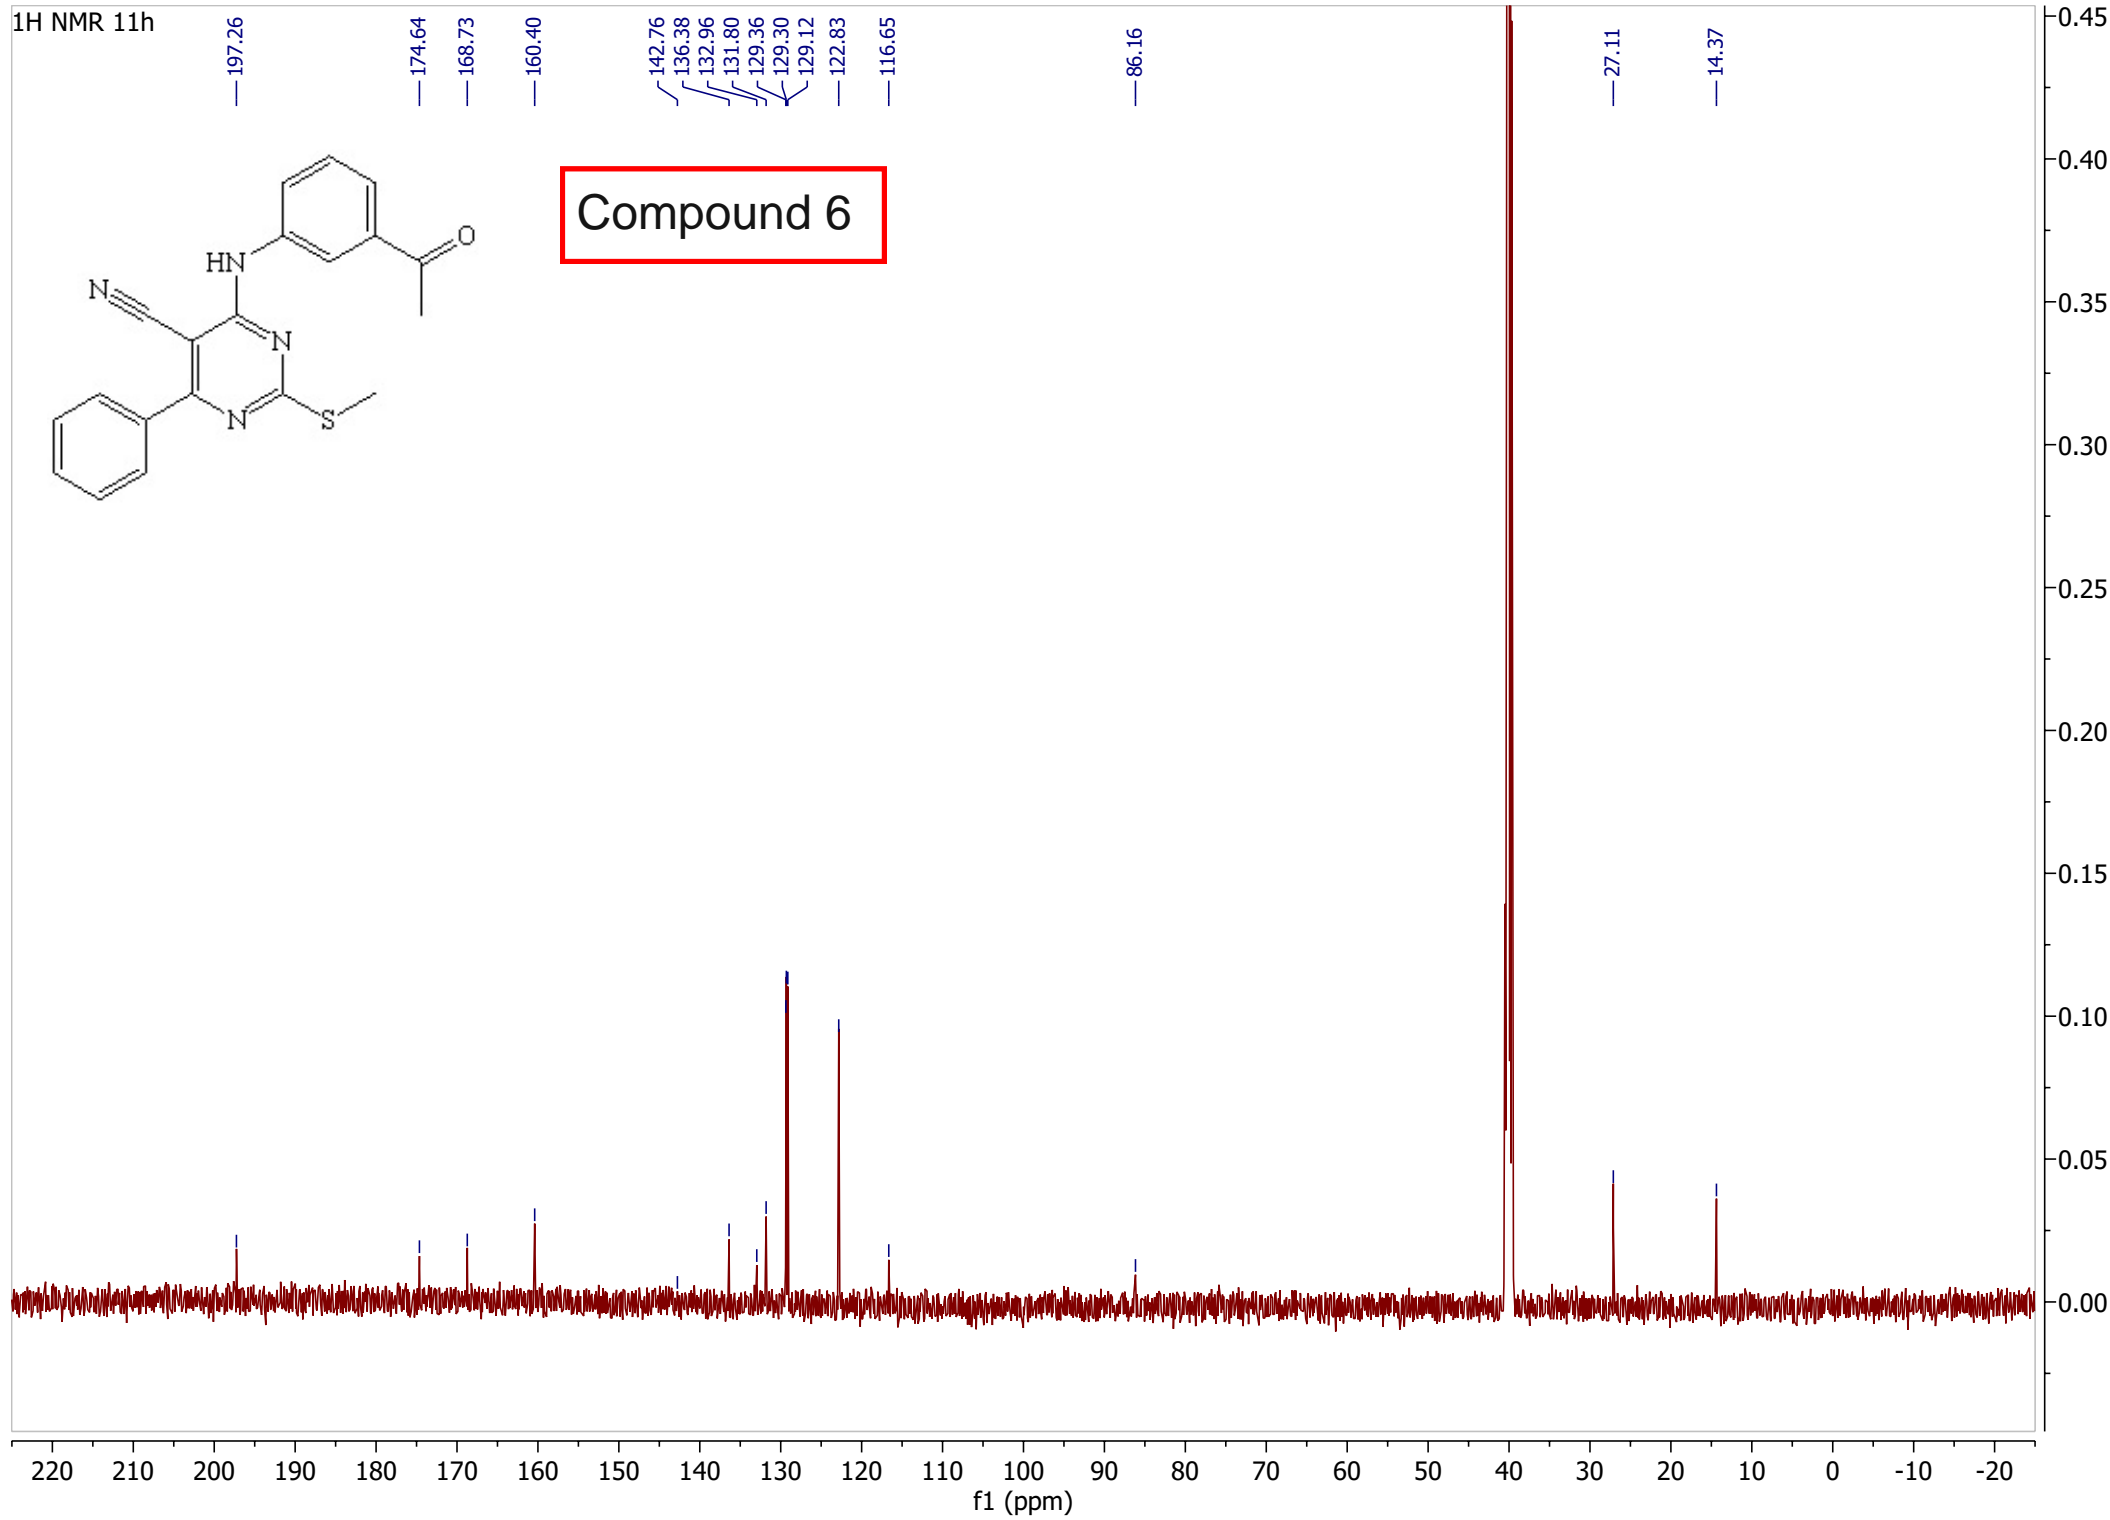

<sup>1</sup>H NMR 11h

Compound 6

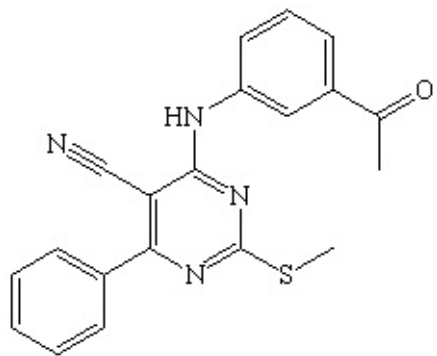

86.16

27.11

14.37

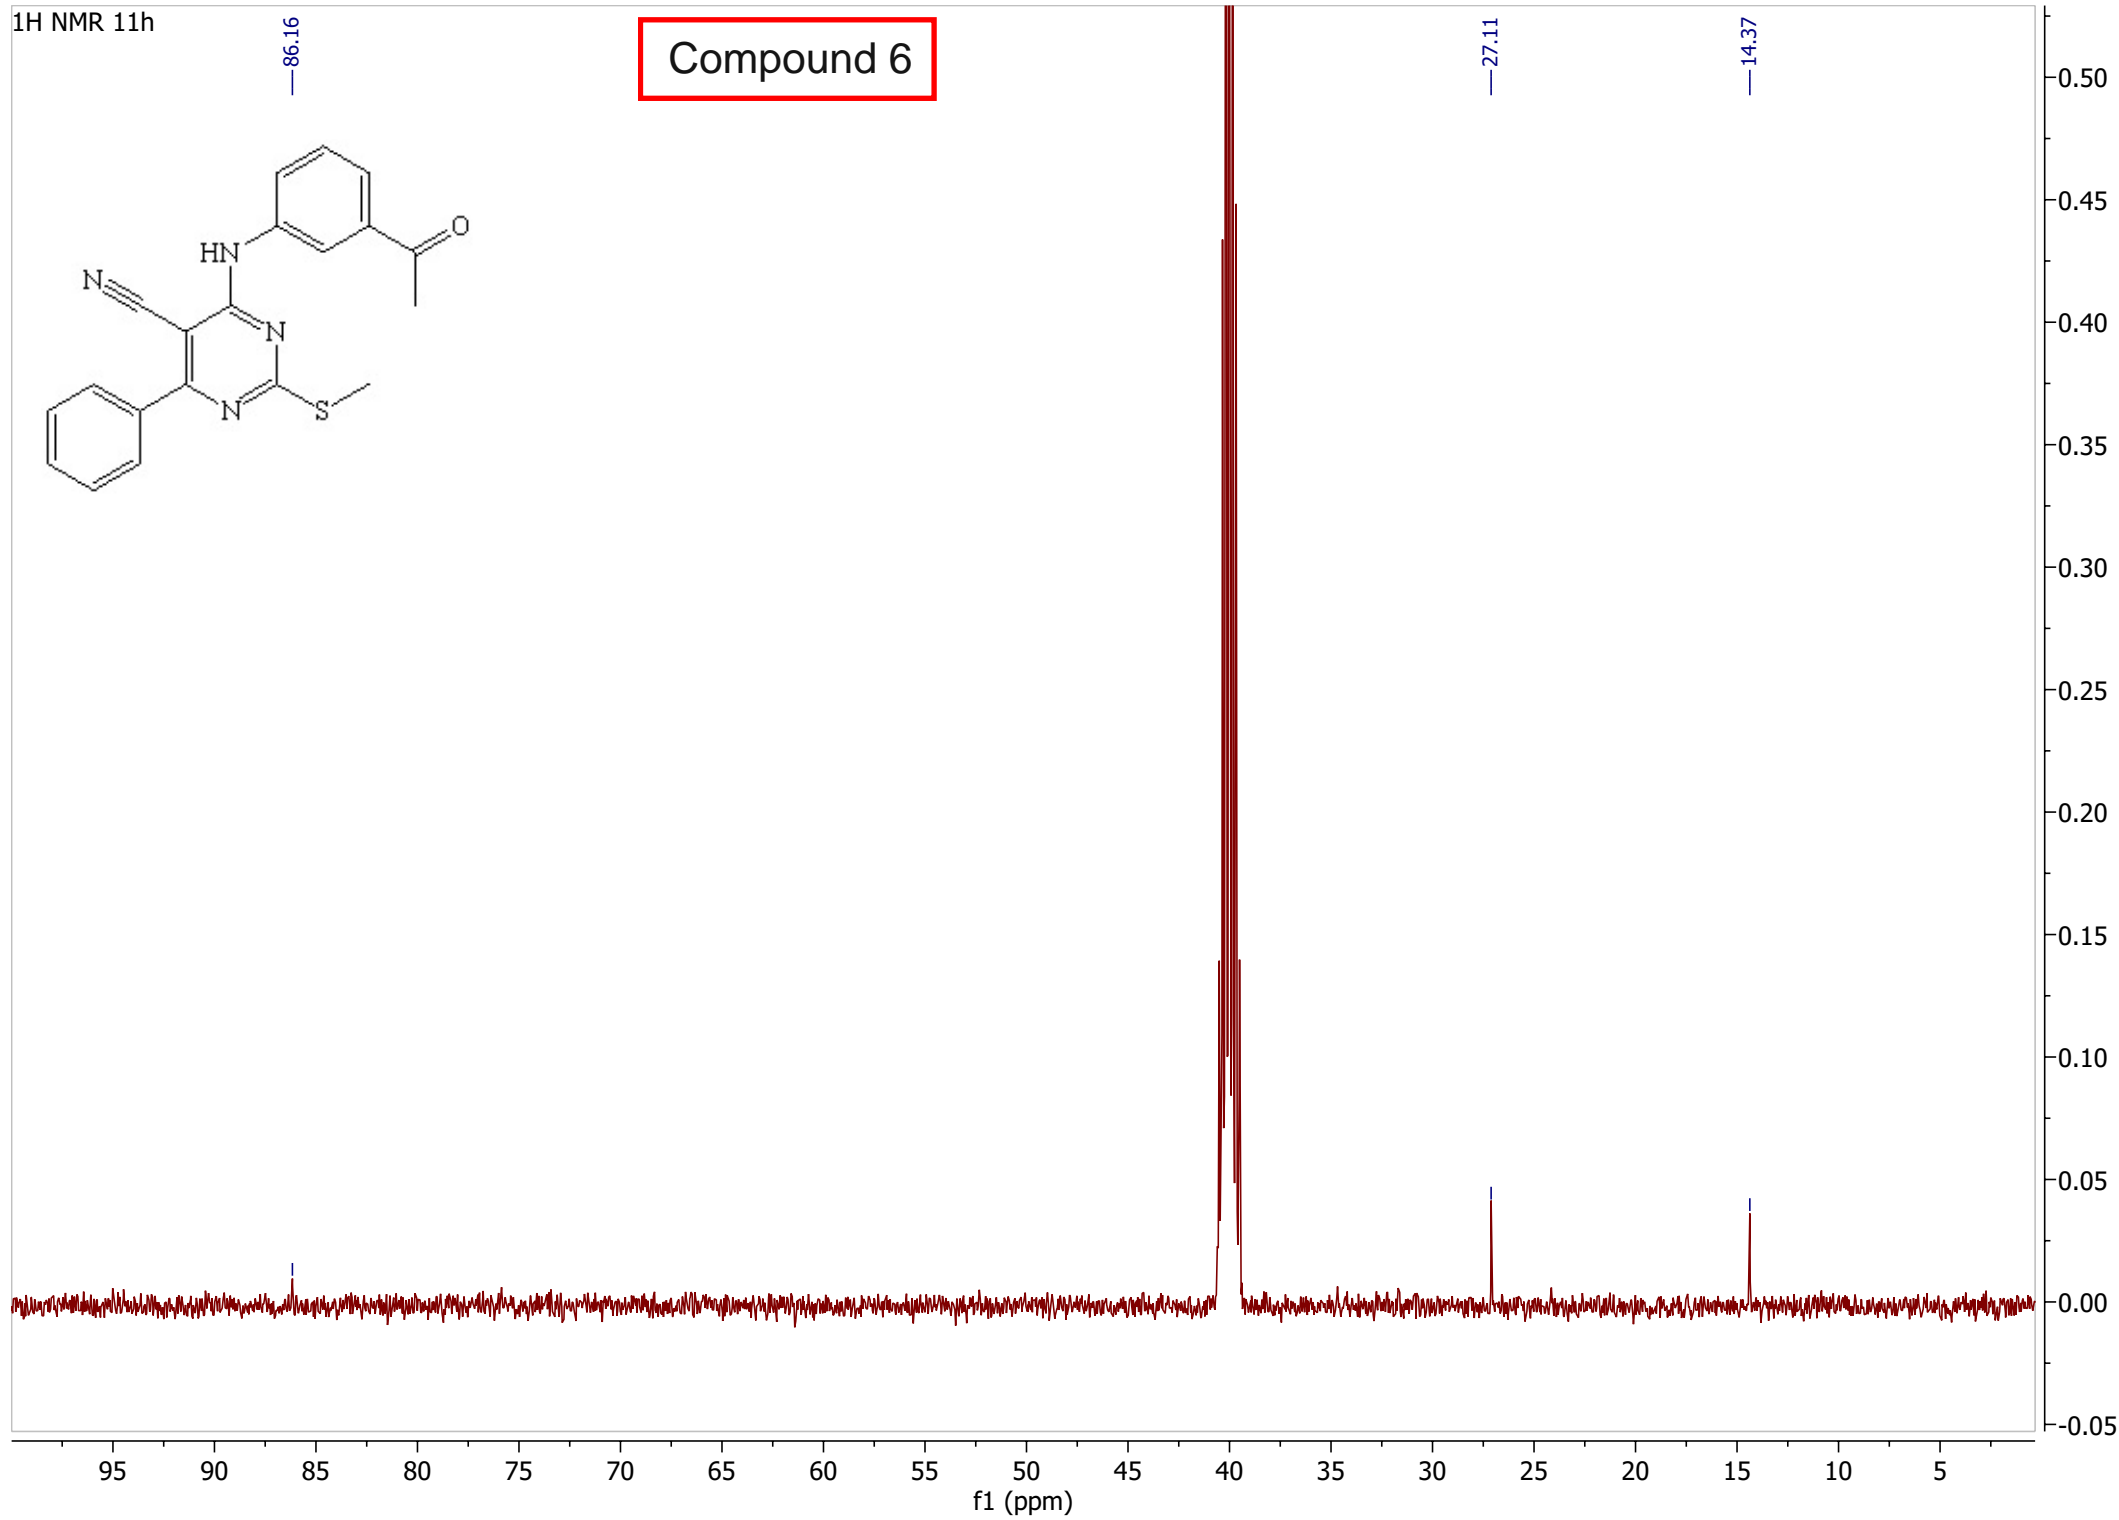

<sup>1</sup>H NMR 11h

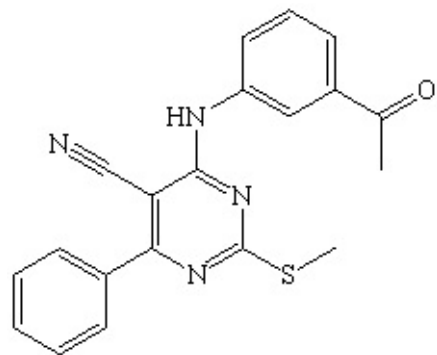

Compound 6

— 197.26

— 174.64

— 168.73

— 160.40

— 142.76

— 136.38

— 132.96

— 131.80

— 129.36

— 129.30

— 129.12

— 122.83

— 116.65

0.40

0.35

0.30

0.25

0.20

0.15

0.10

0.05

0.00

205 200 195 190 185 180 175 170 165 160 155 150 145 140 135 130 125 120 115 110 105 100

f1 (ppm)

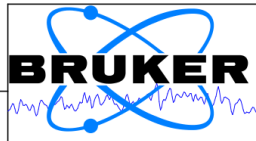

Compound 8

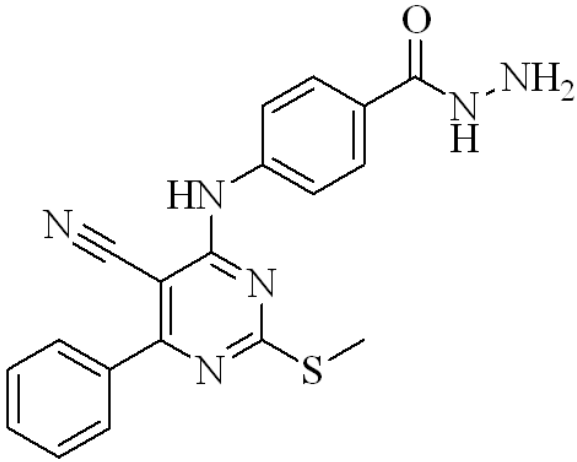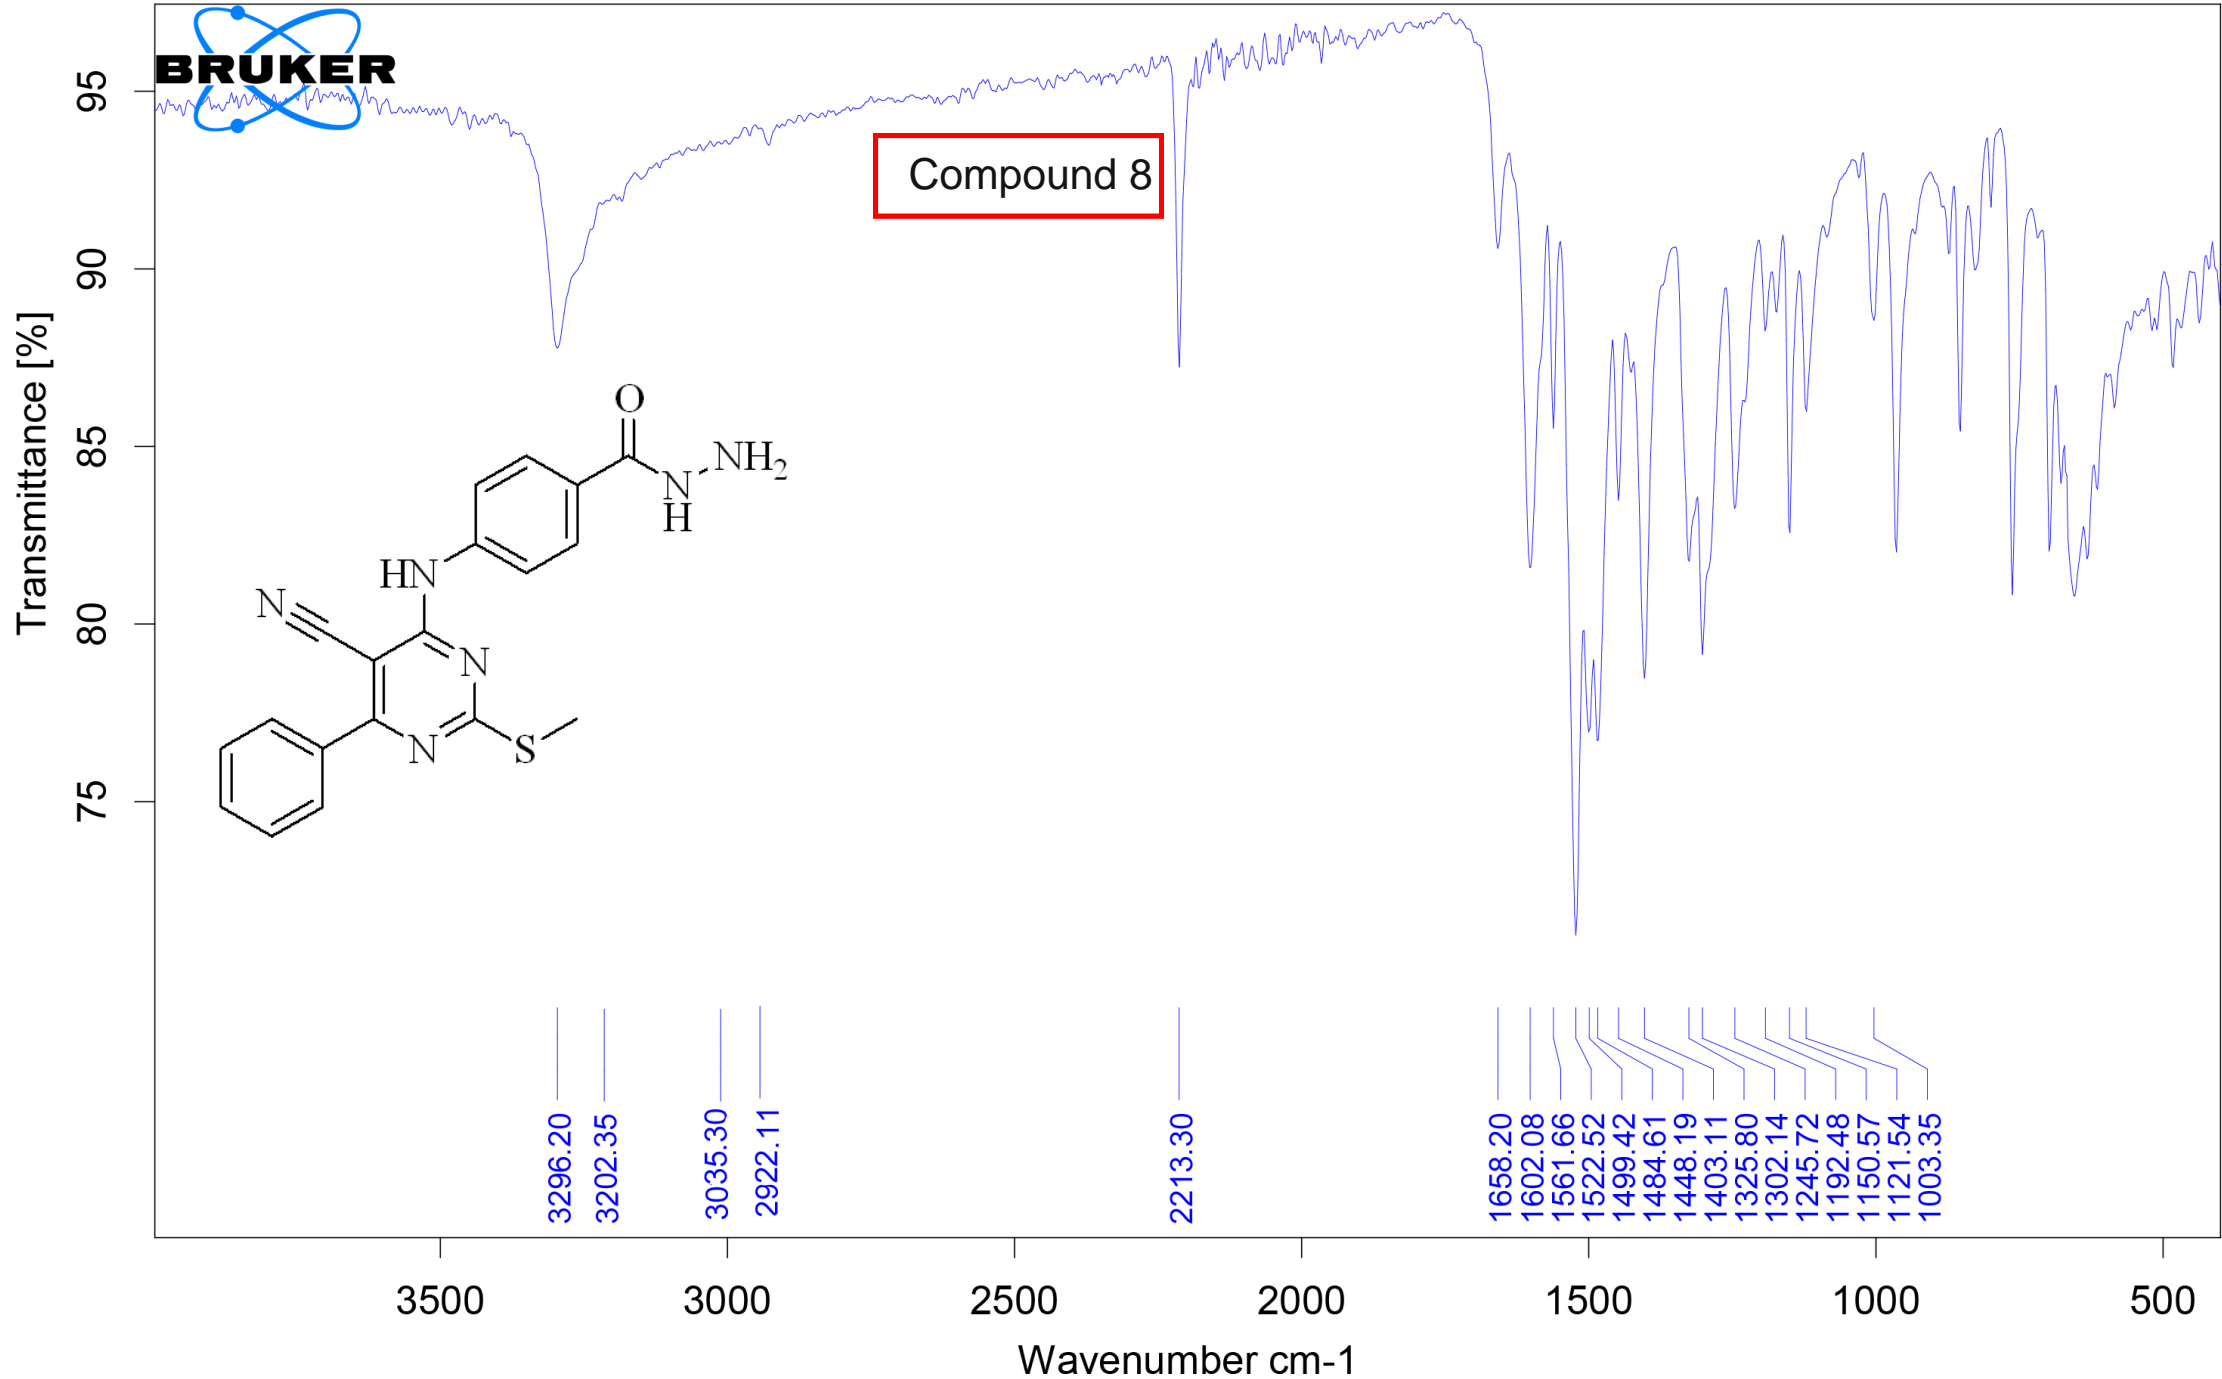

<sup>1</sup>H NMR 11h

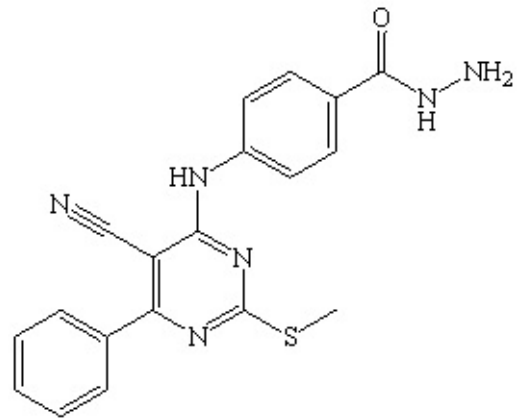

Compound 8

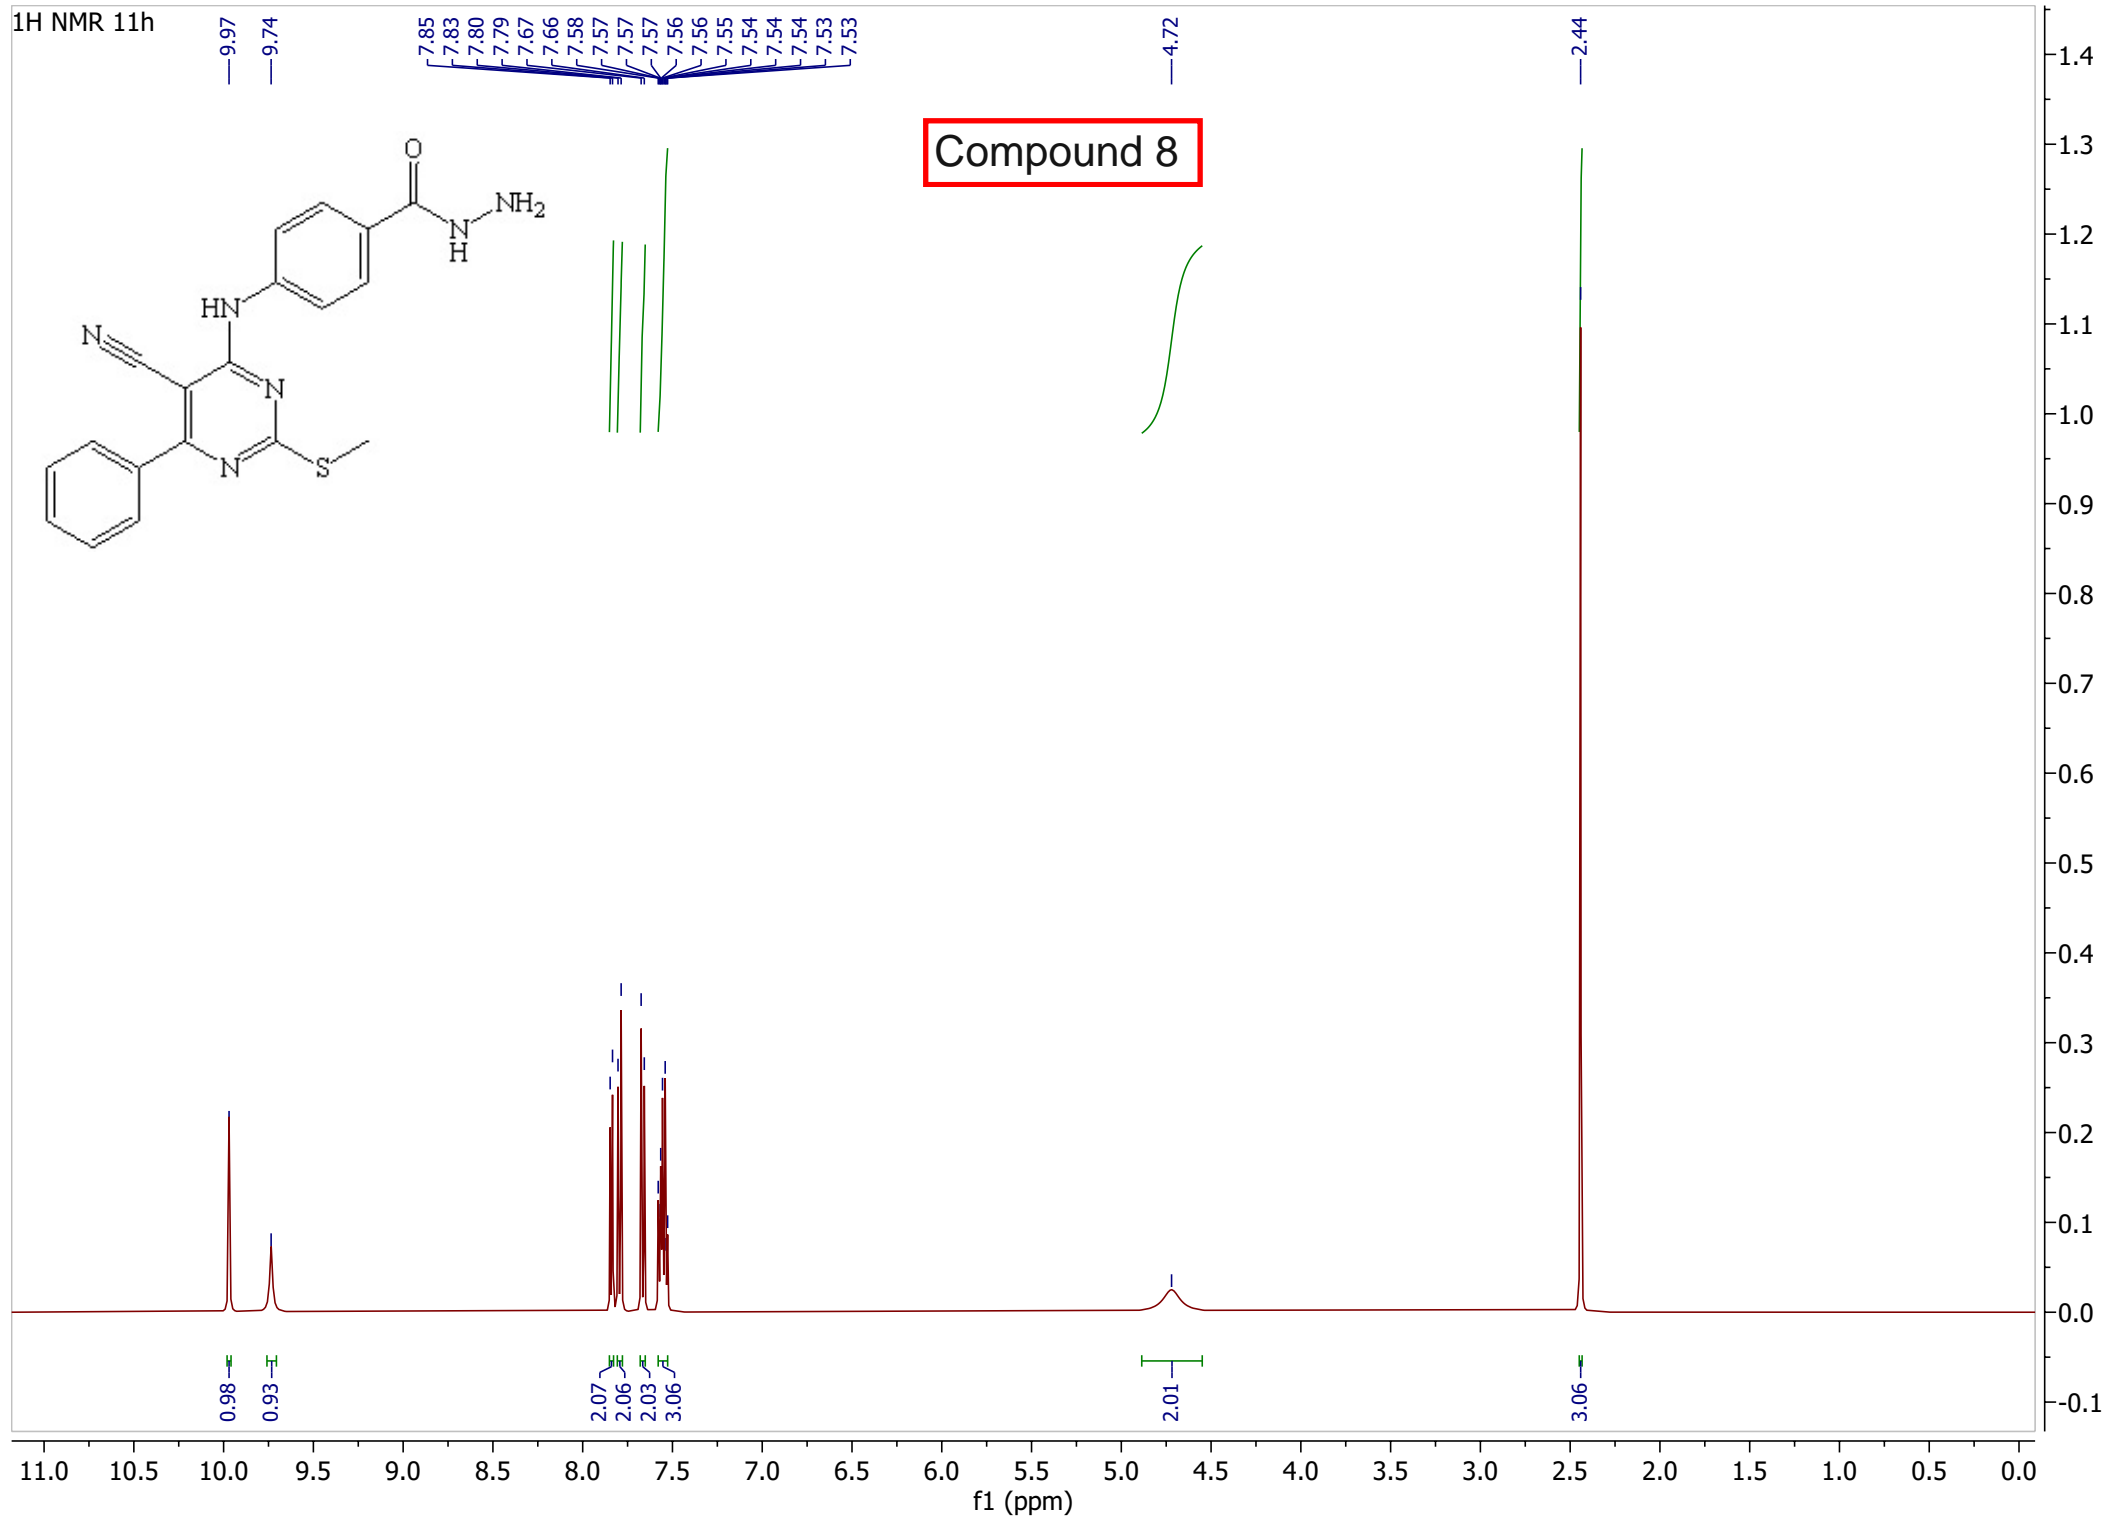

# Compound 8

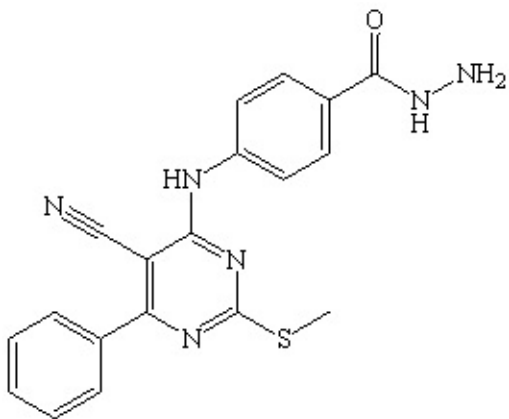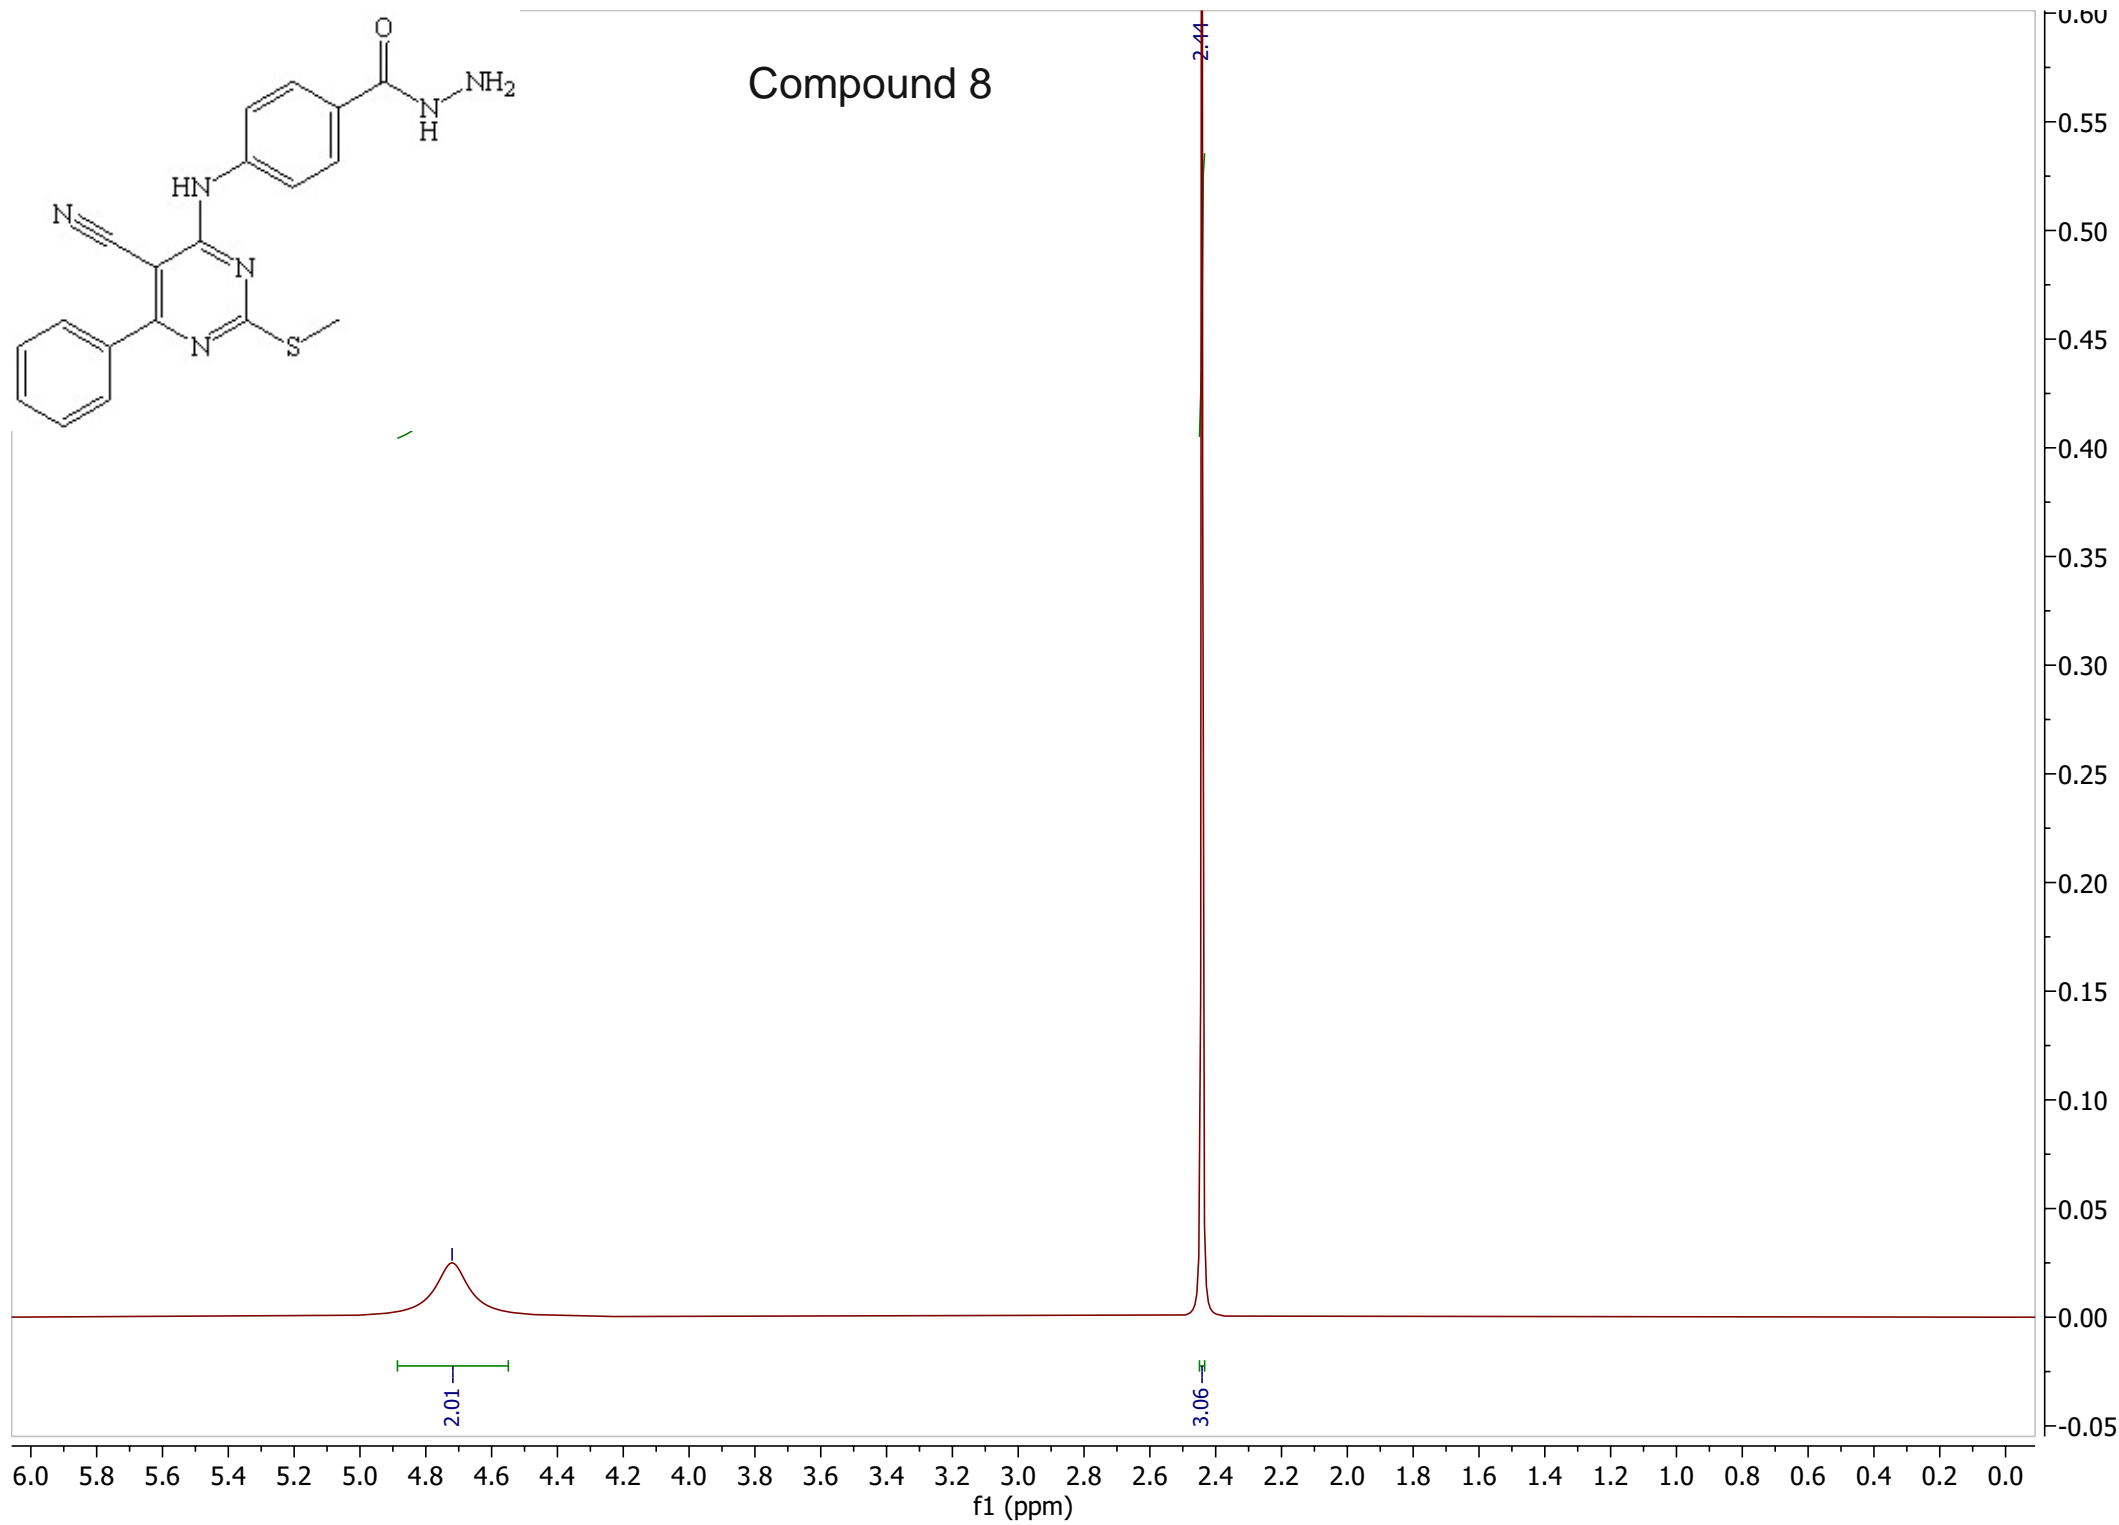

<sup>1</sup>H NMR 11h

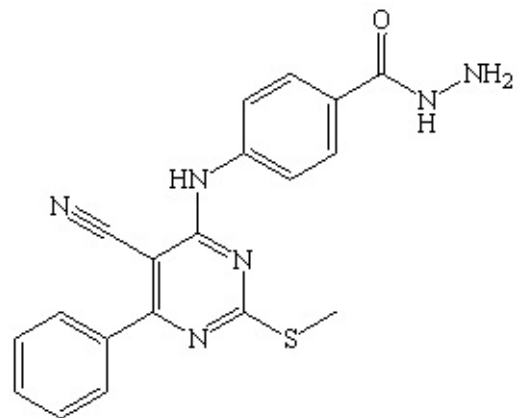

Compound 8

7.85  
7.83  
7.80  
7.79  
7.67  
7.66  
7.58  
7.57  
7.57  
7.57  
7.56  
7.56  
7.55  
7.54  
7.54  
7.54  
7.53  
7.53

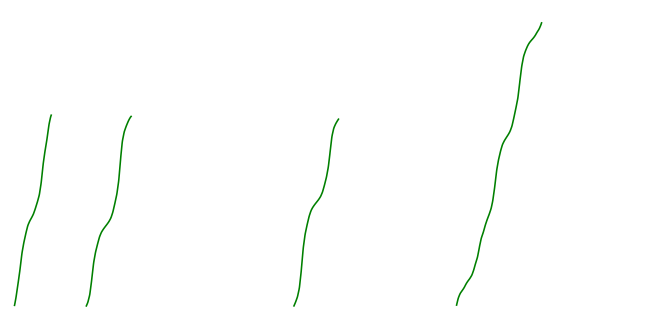

2.07  
2.06  
2.03  
3.06

8.20 8.15 8.10 8.05 8.00 7.95 7.90 7.85 7.80 7.75 7.70 7.65 7.60 7.55 7.50 7.45 7.40 7.35 7.30 7.25 7.20 7.15 7.10 7.05 7.00

f1 (ppm)



<sup>1</sup>H NMR 11h

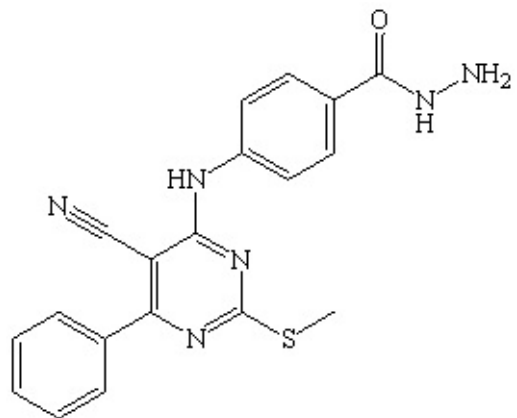

Compound 8

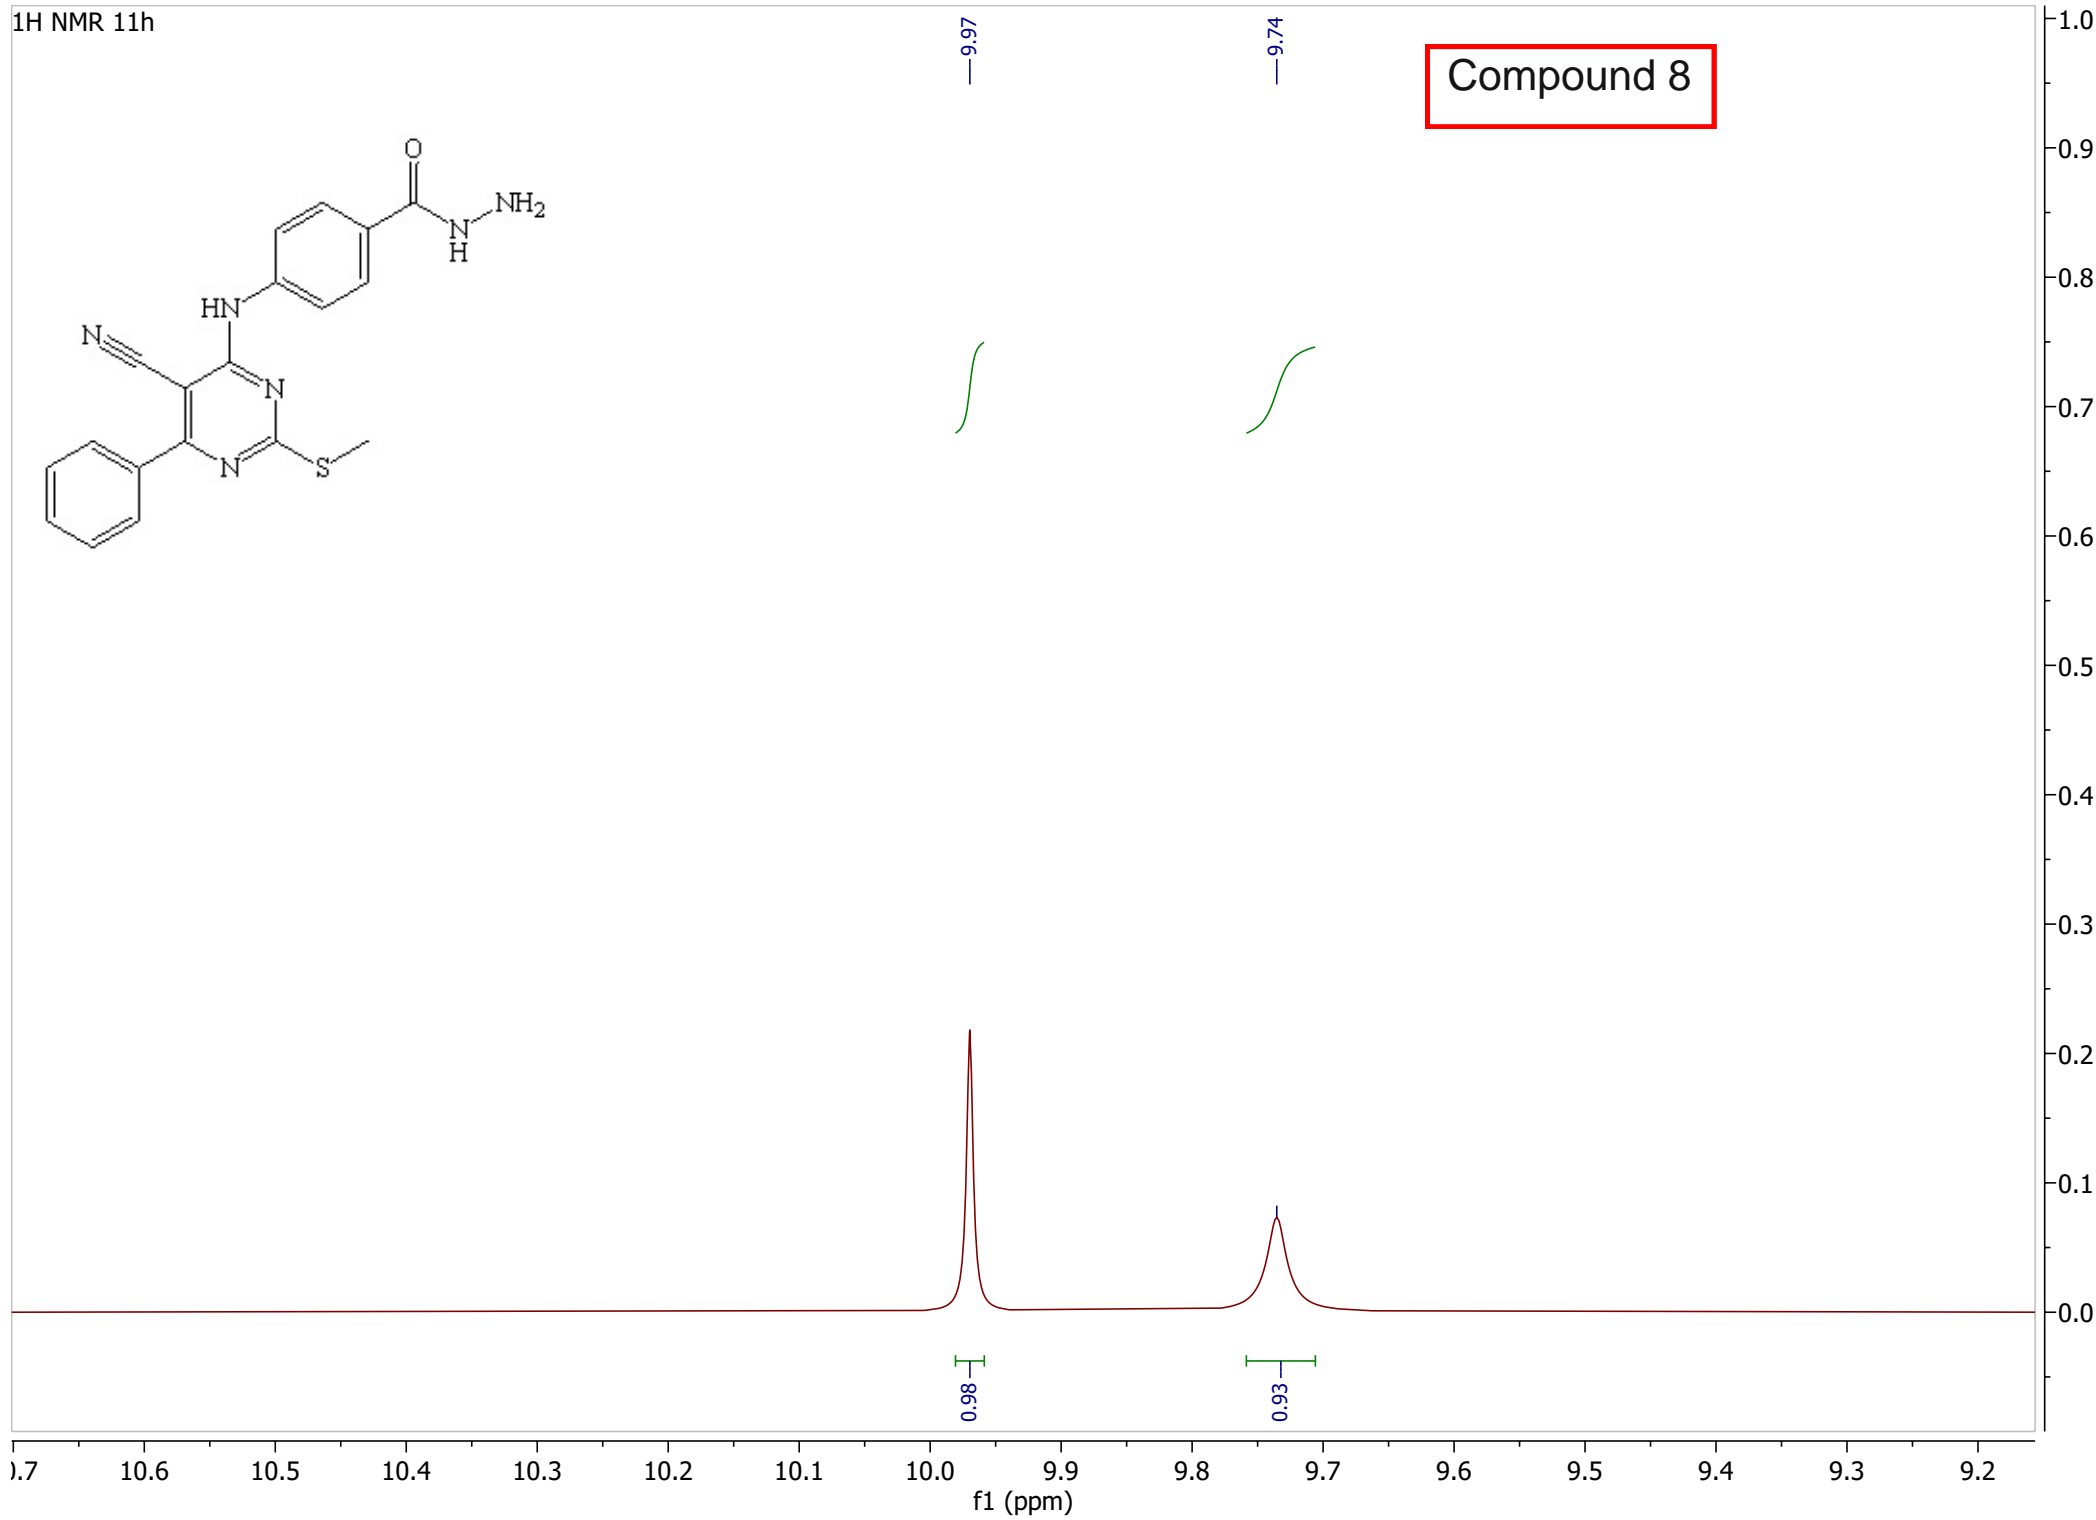

<sup>1</sup>H NMR 41h

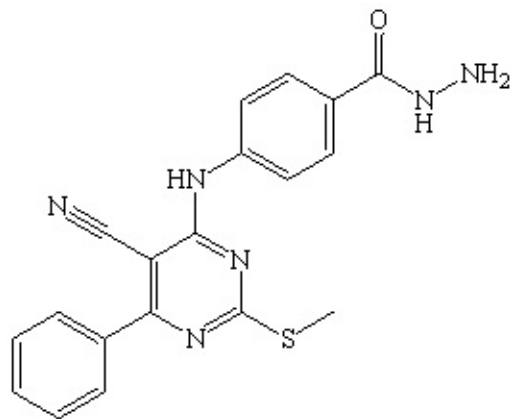

Compound 8

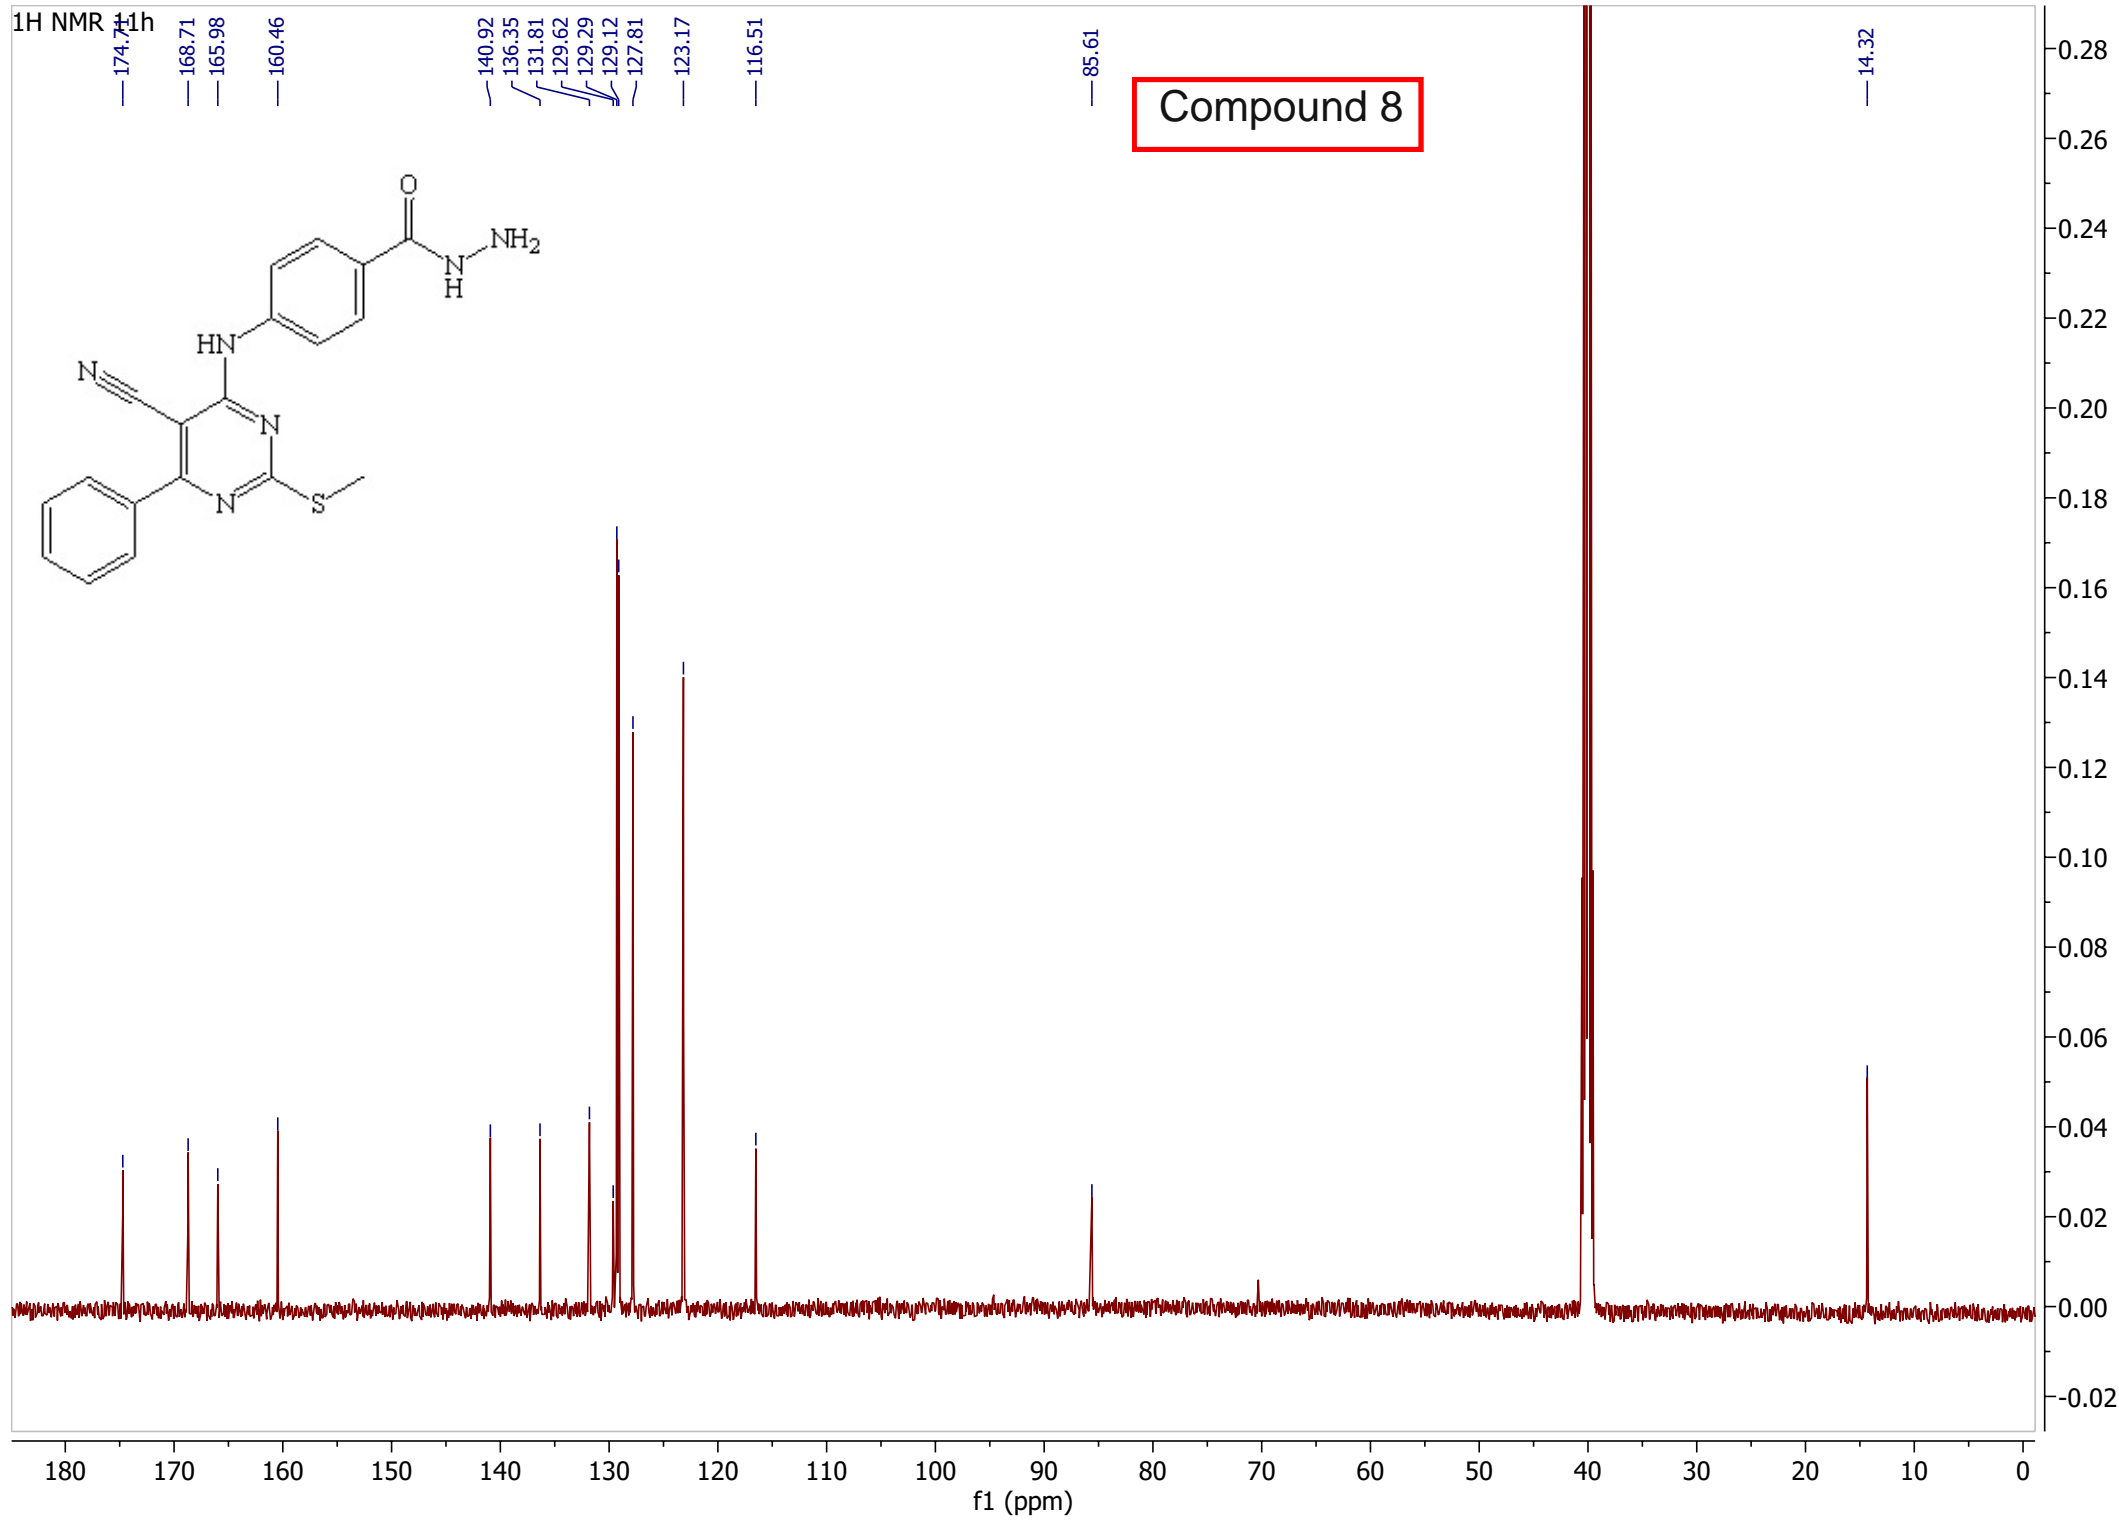

<sup>1</sup>H NMR 11h

—85.61

Compound 8

—14.32

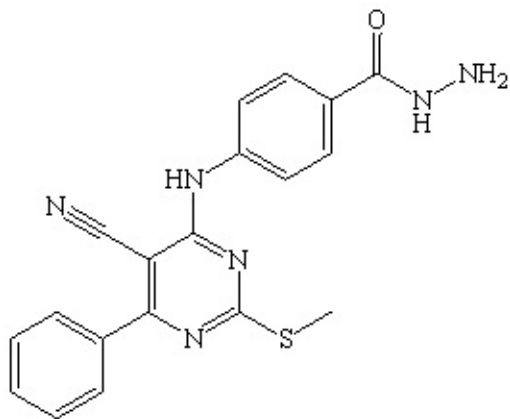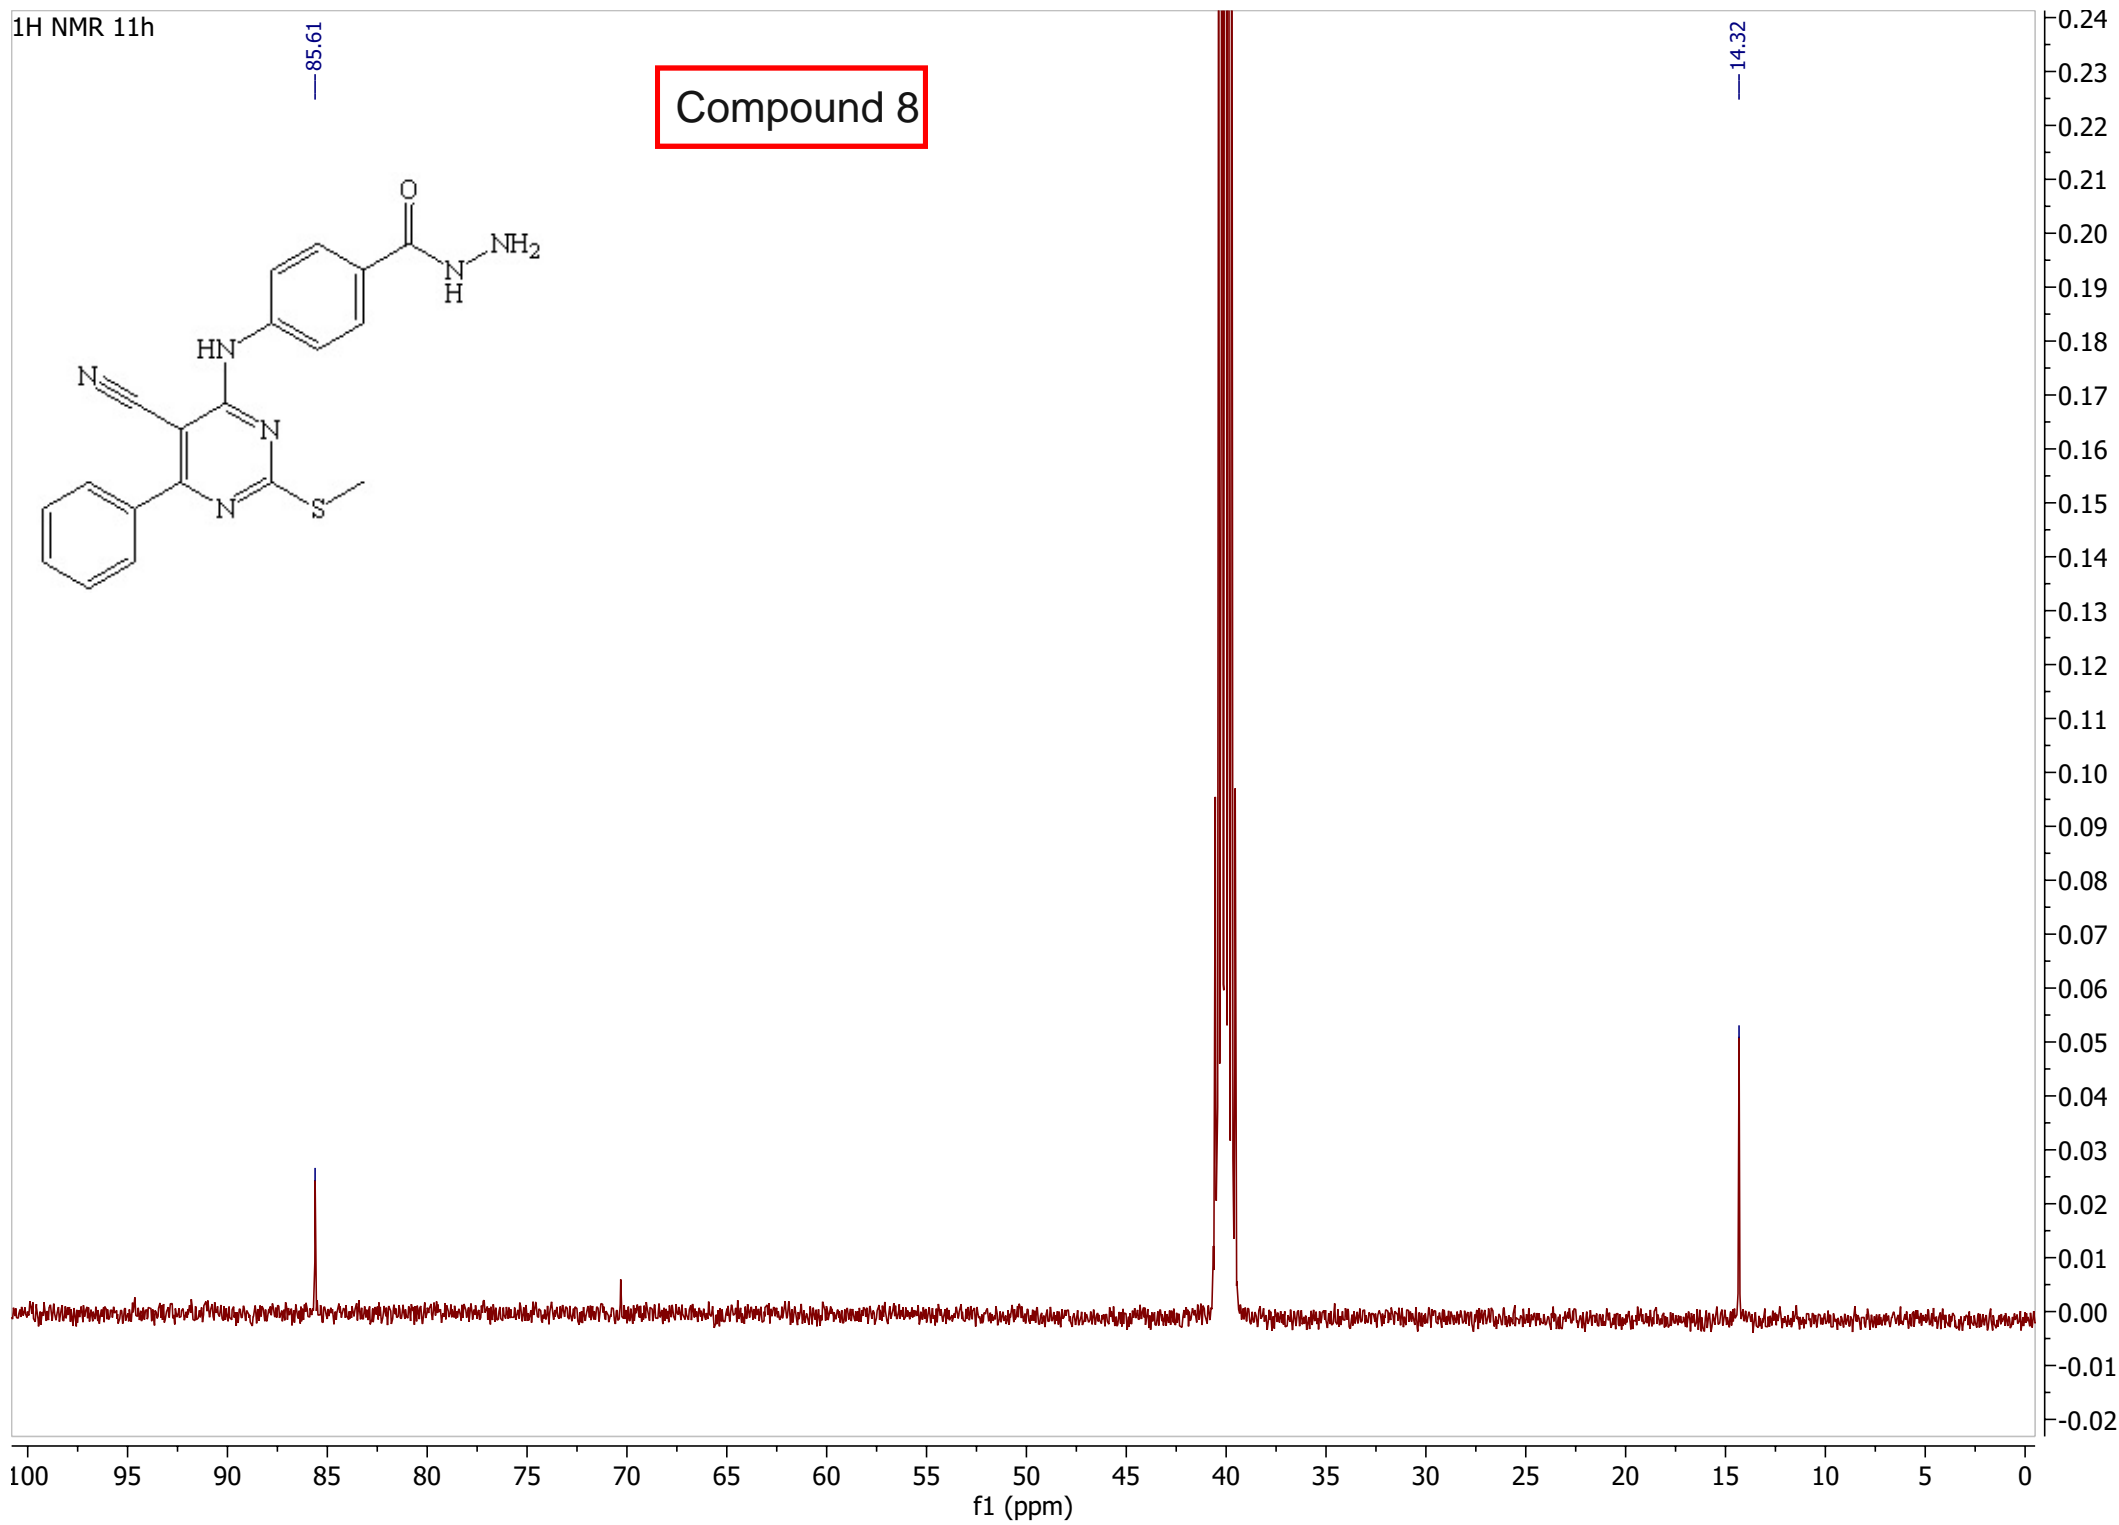



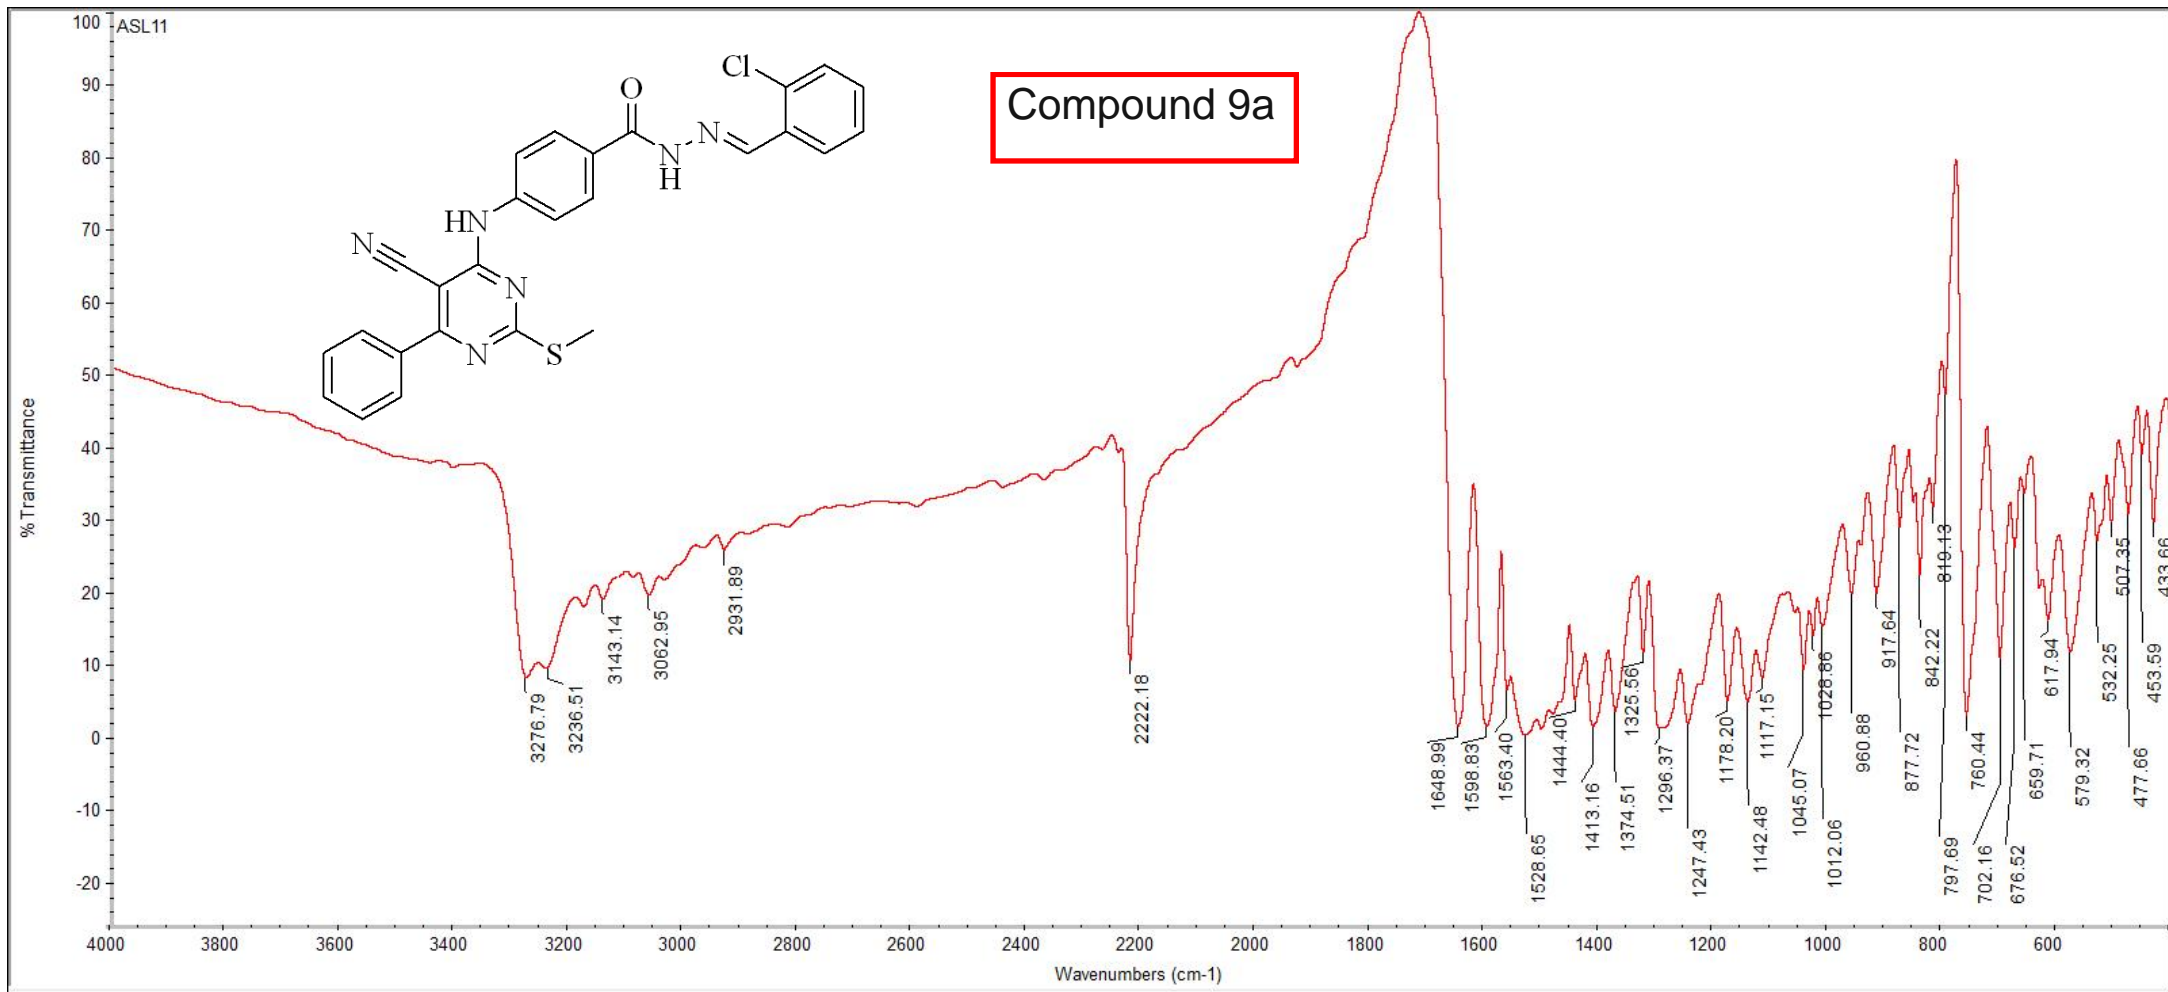

<sup>1</sup>H NMR 11h

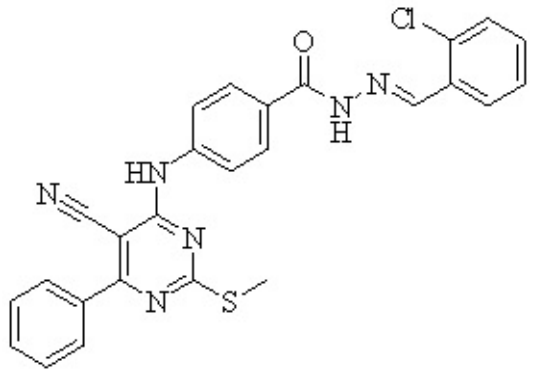

Compound 9a

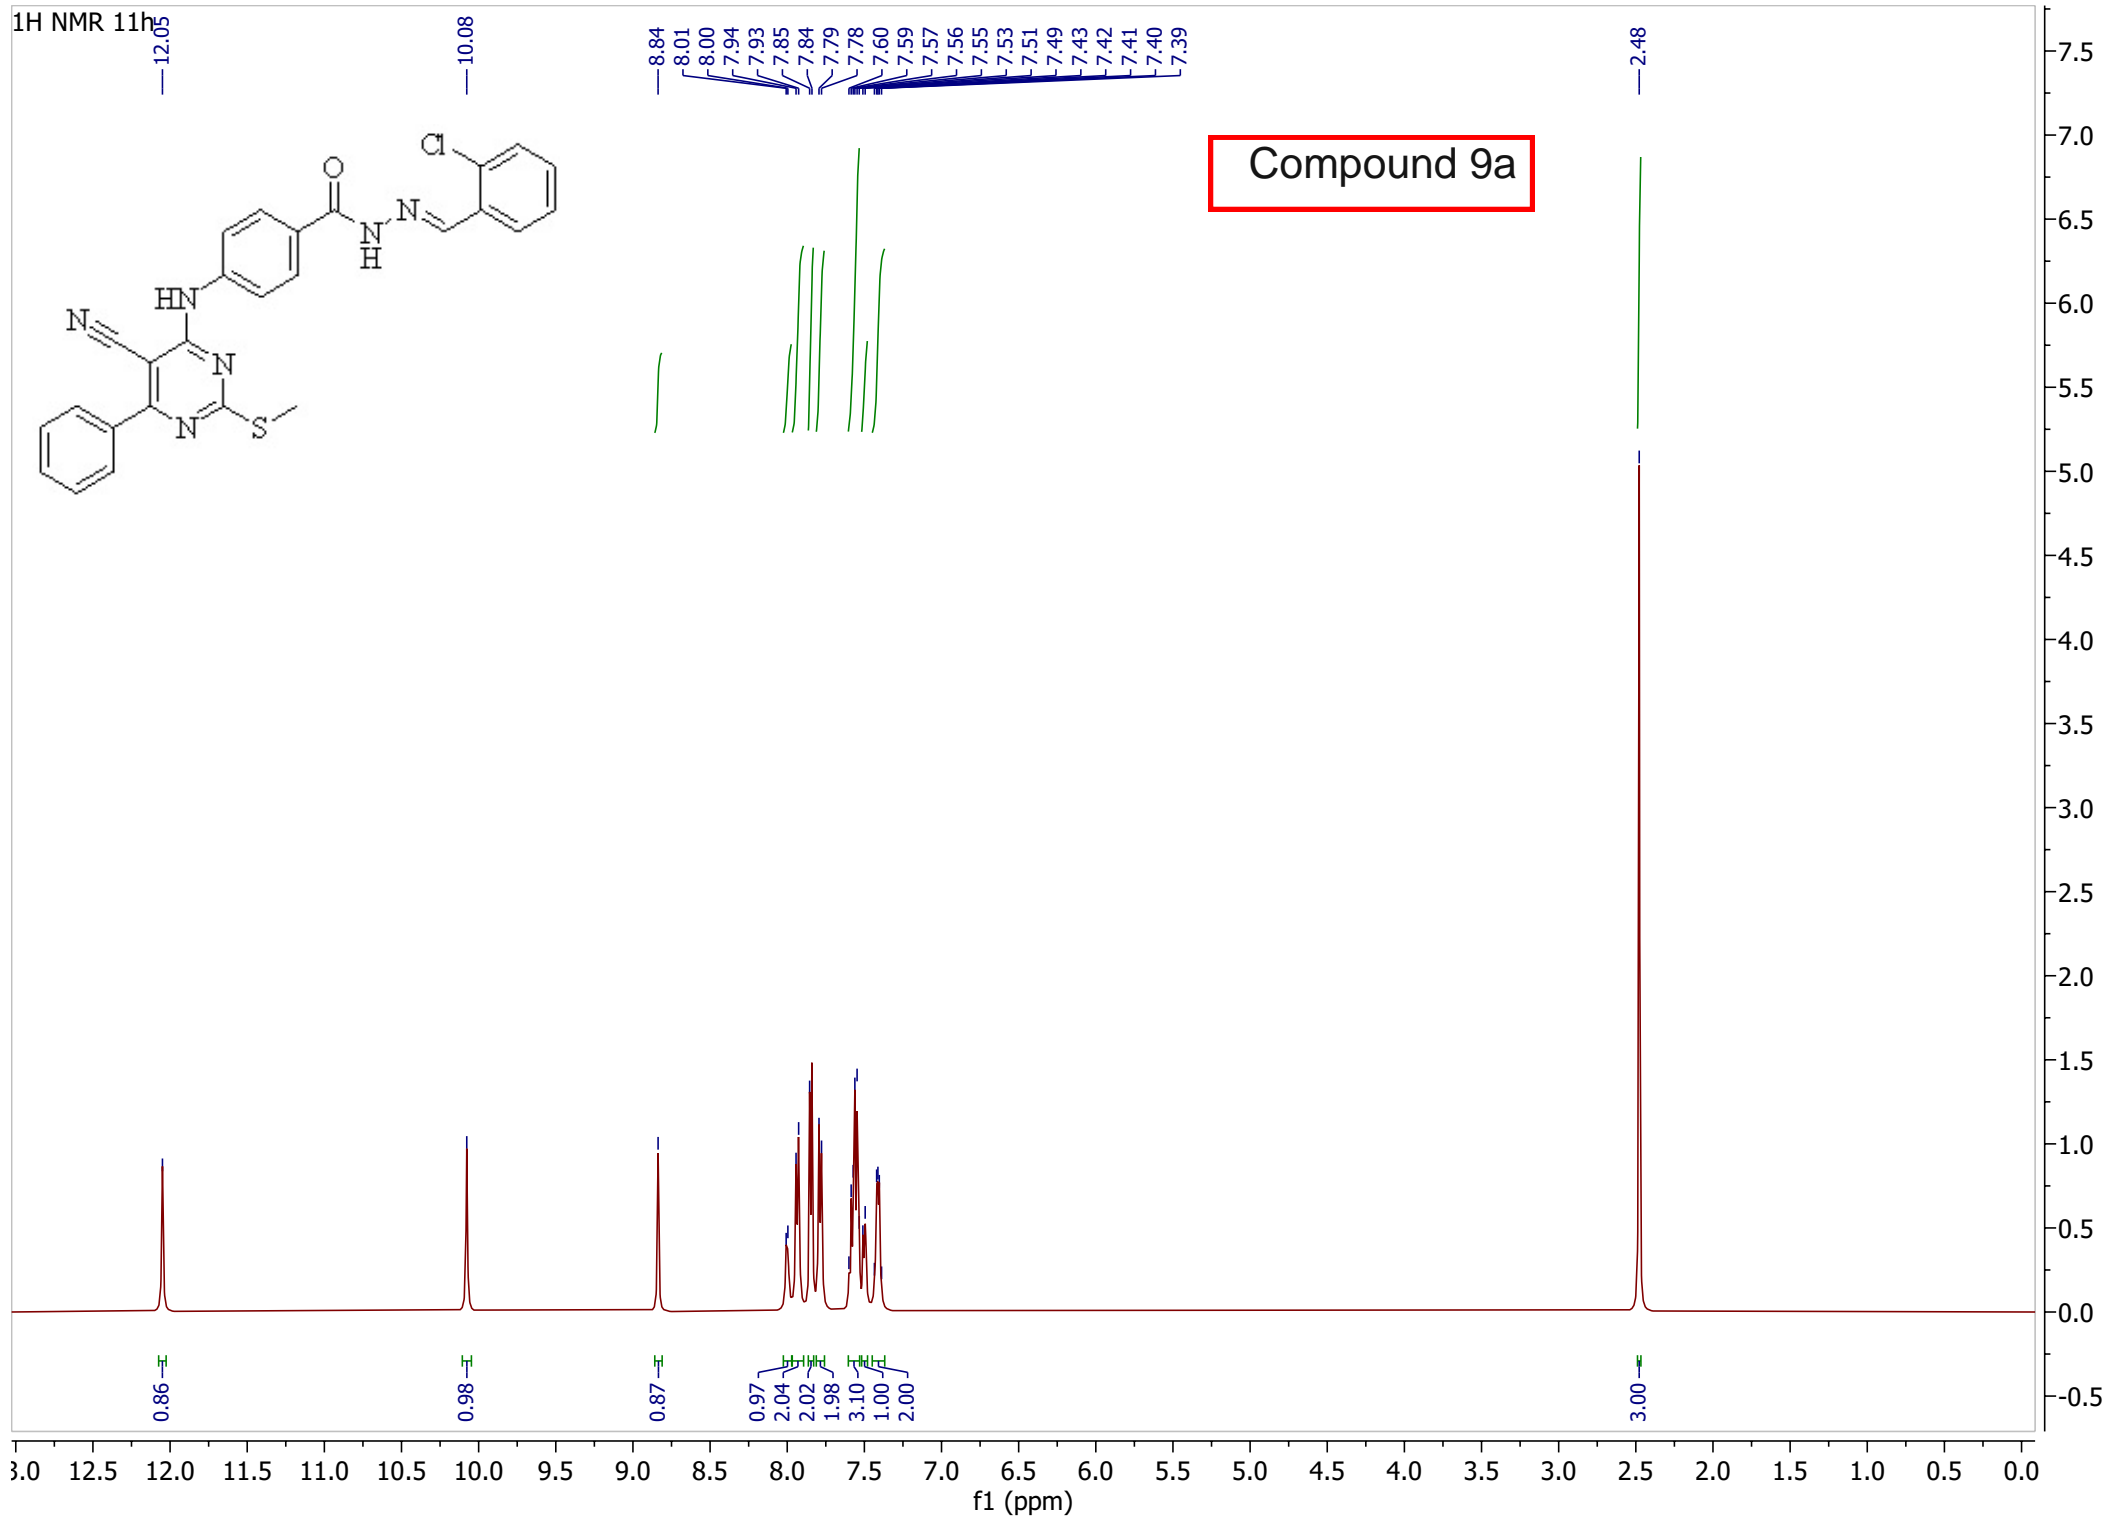

<sup>1</sup>H NMR 11h

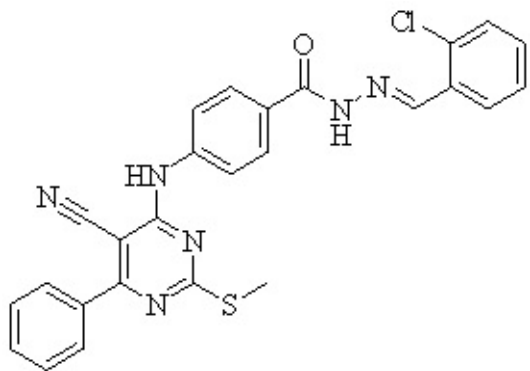

Compound 9a

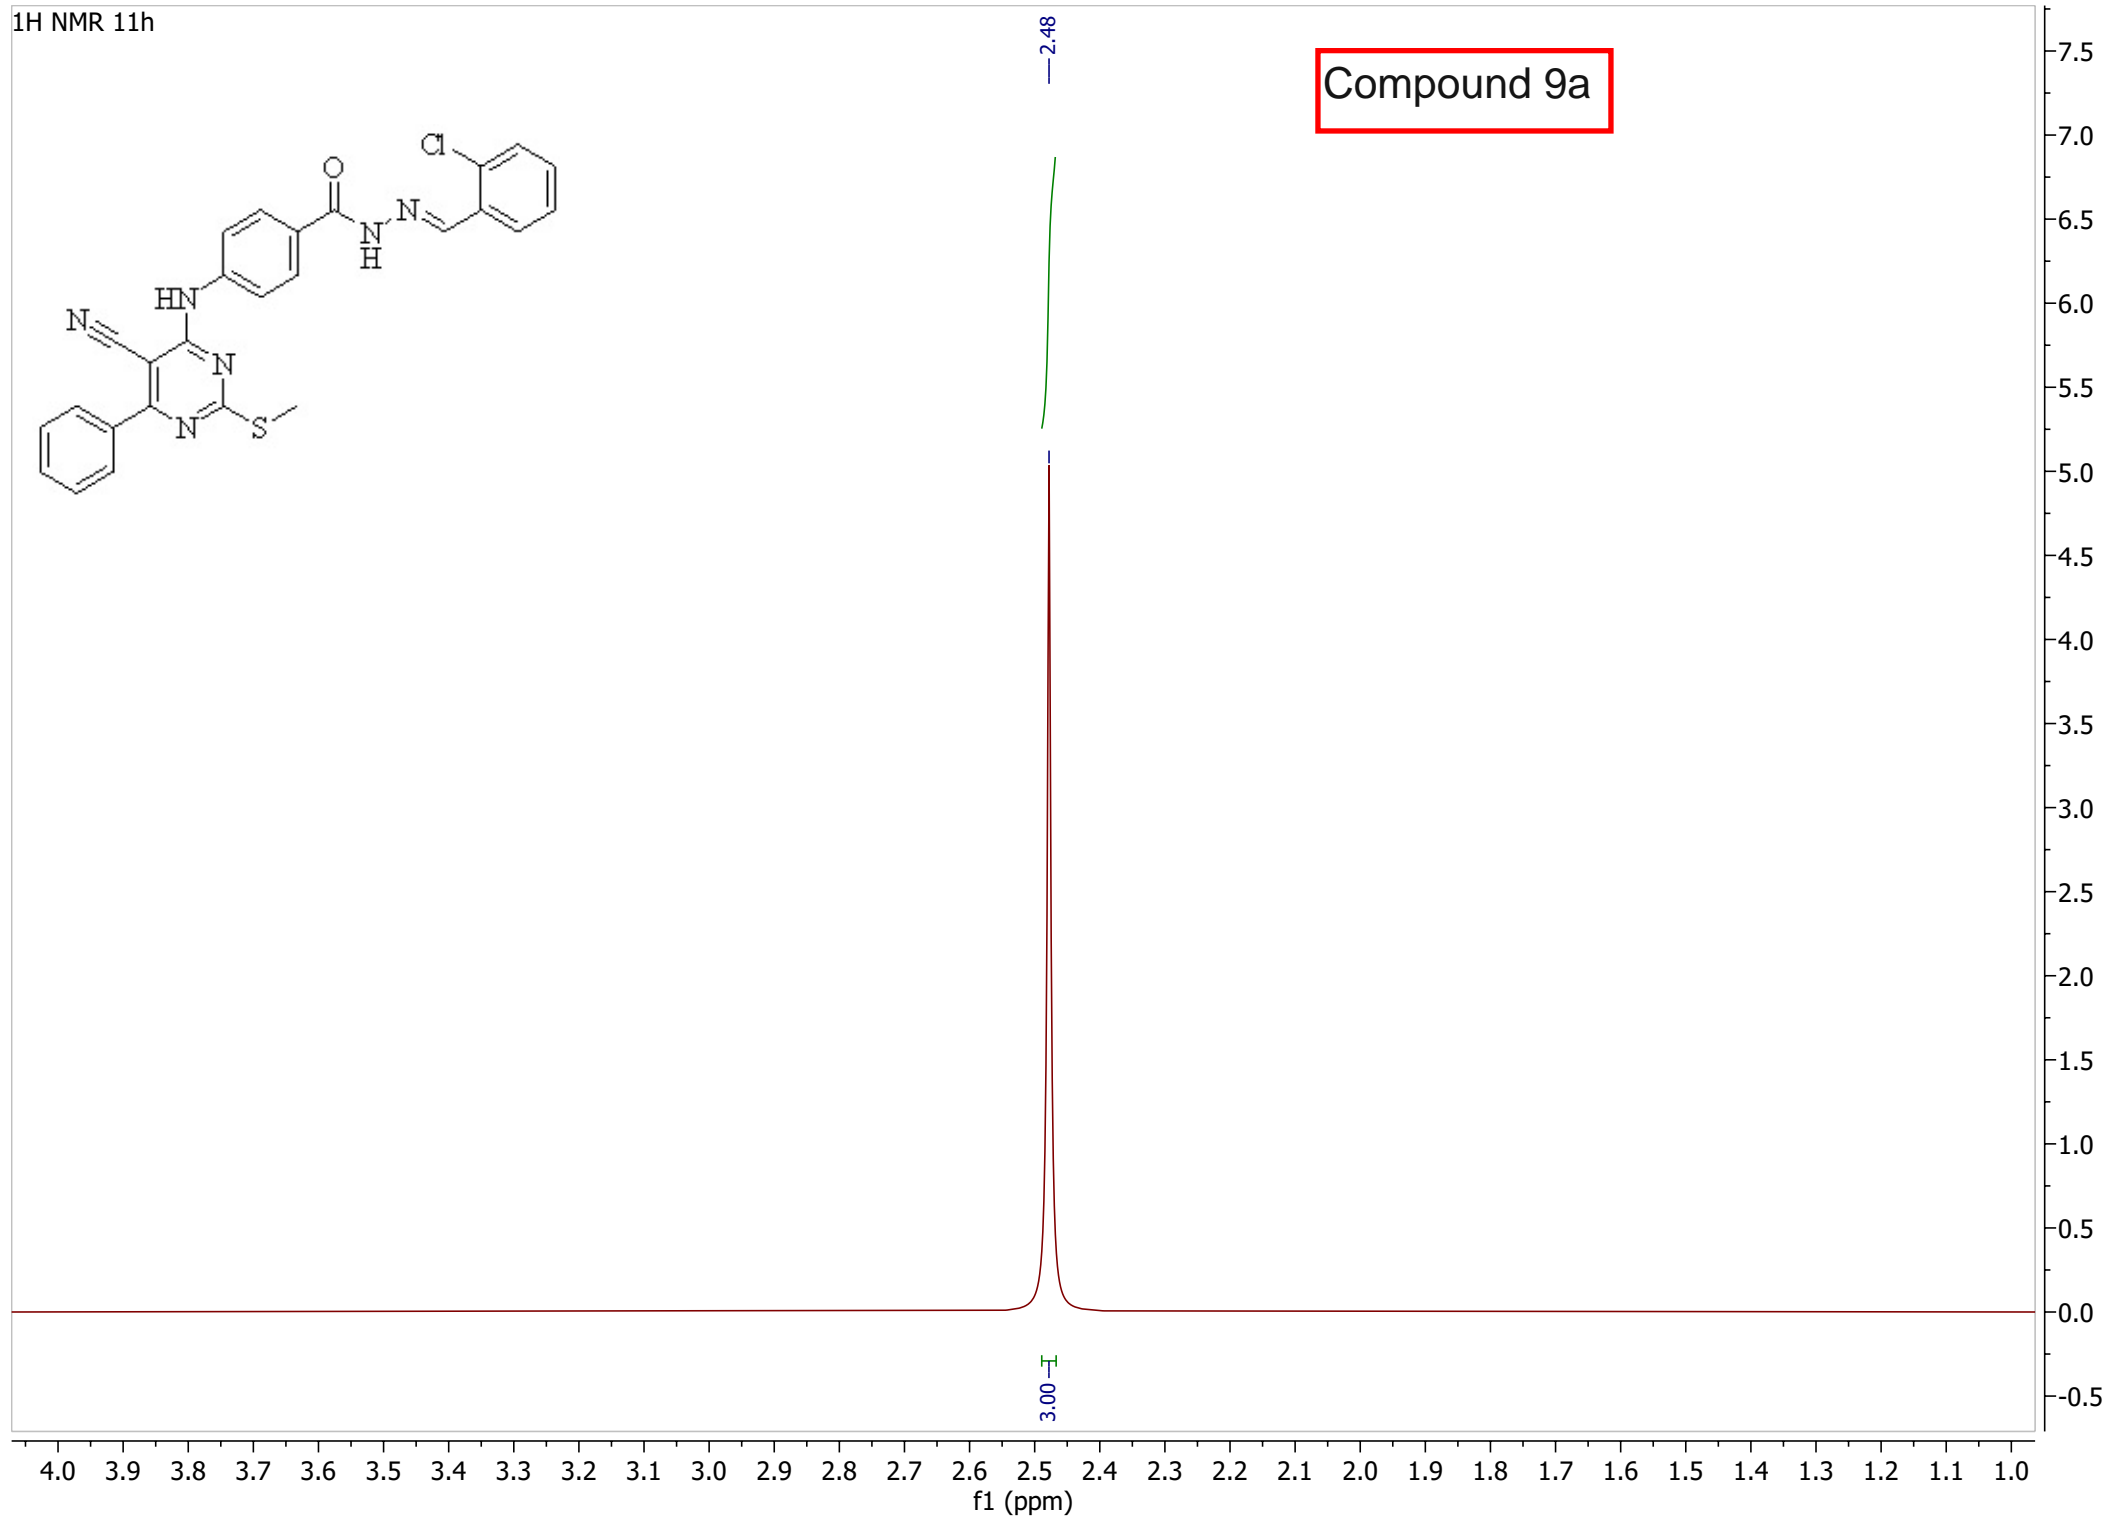

<sup>1</sup>H NMR 11h



Compound 9a

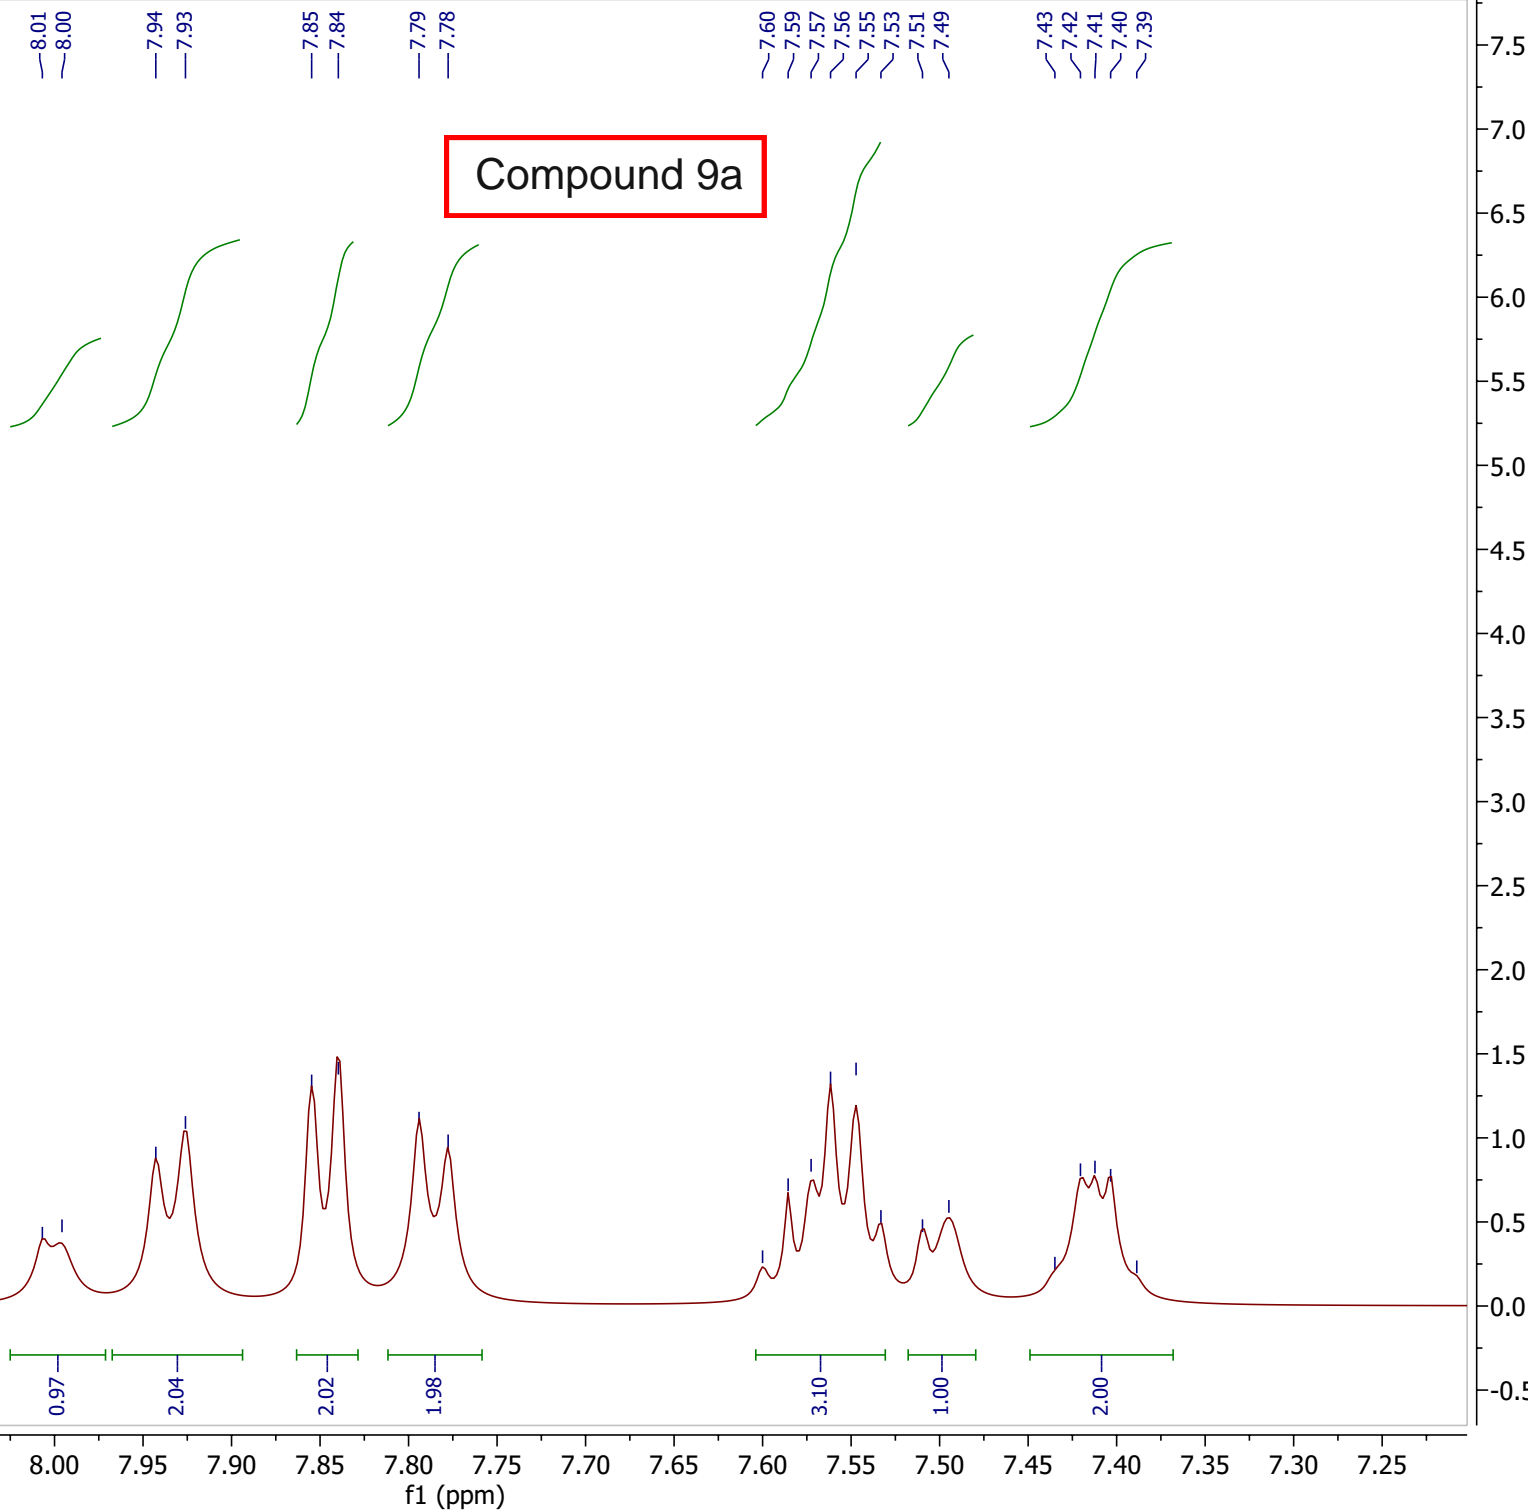



<sup>1</sup>H NMR 11h

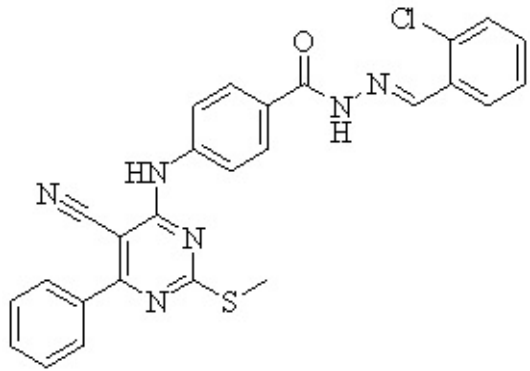

Compound 9a

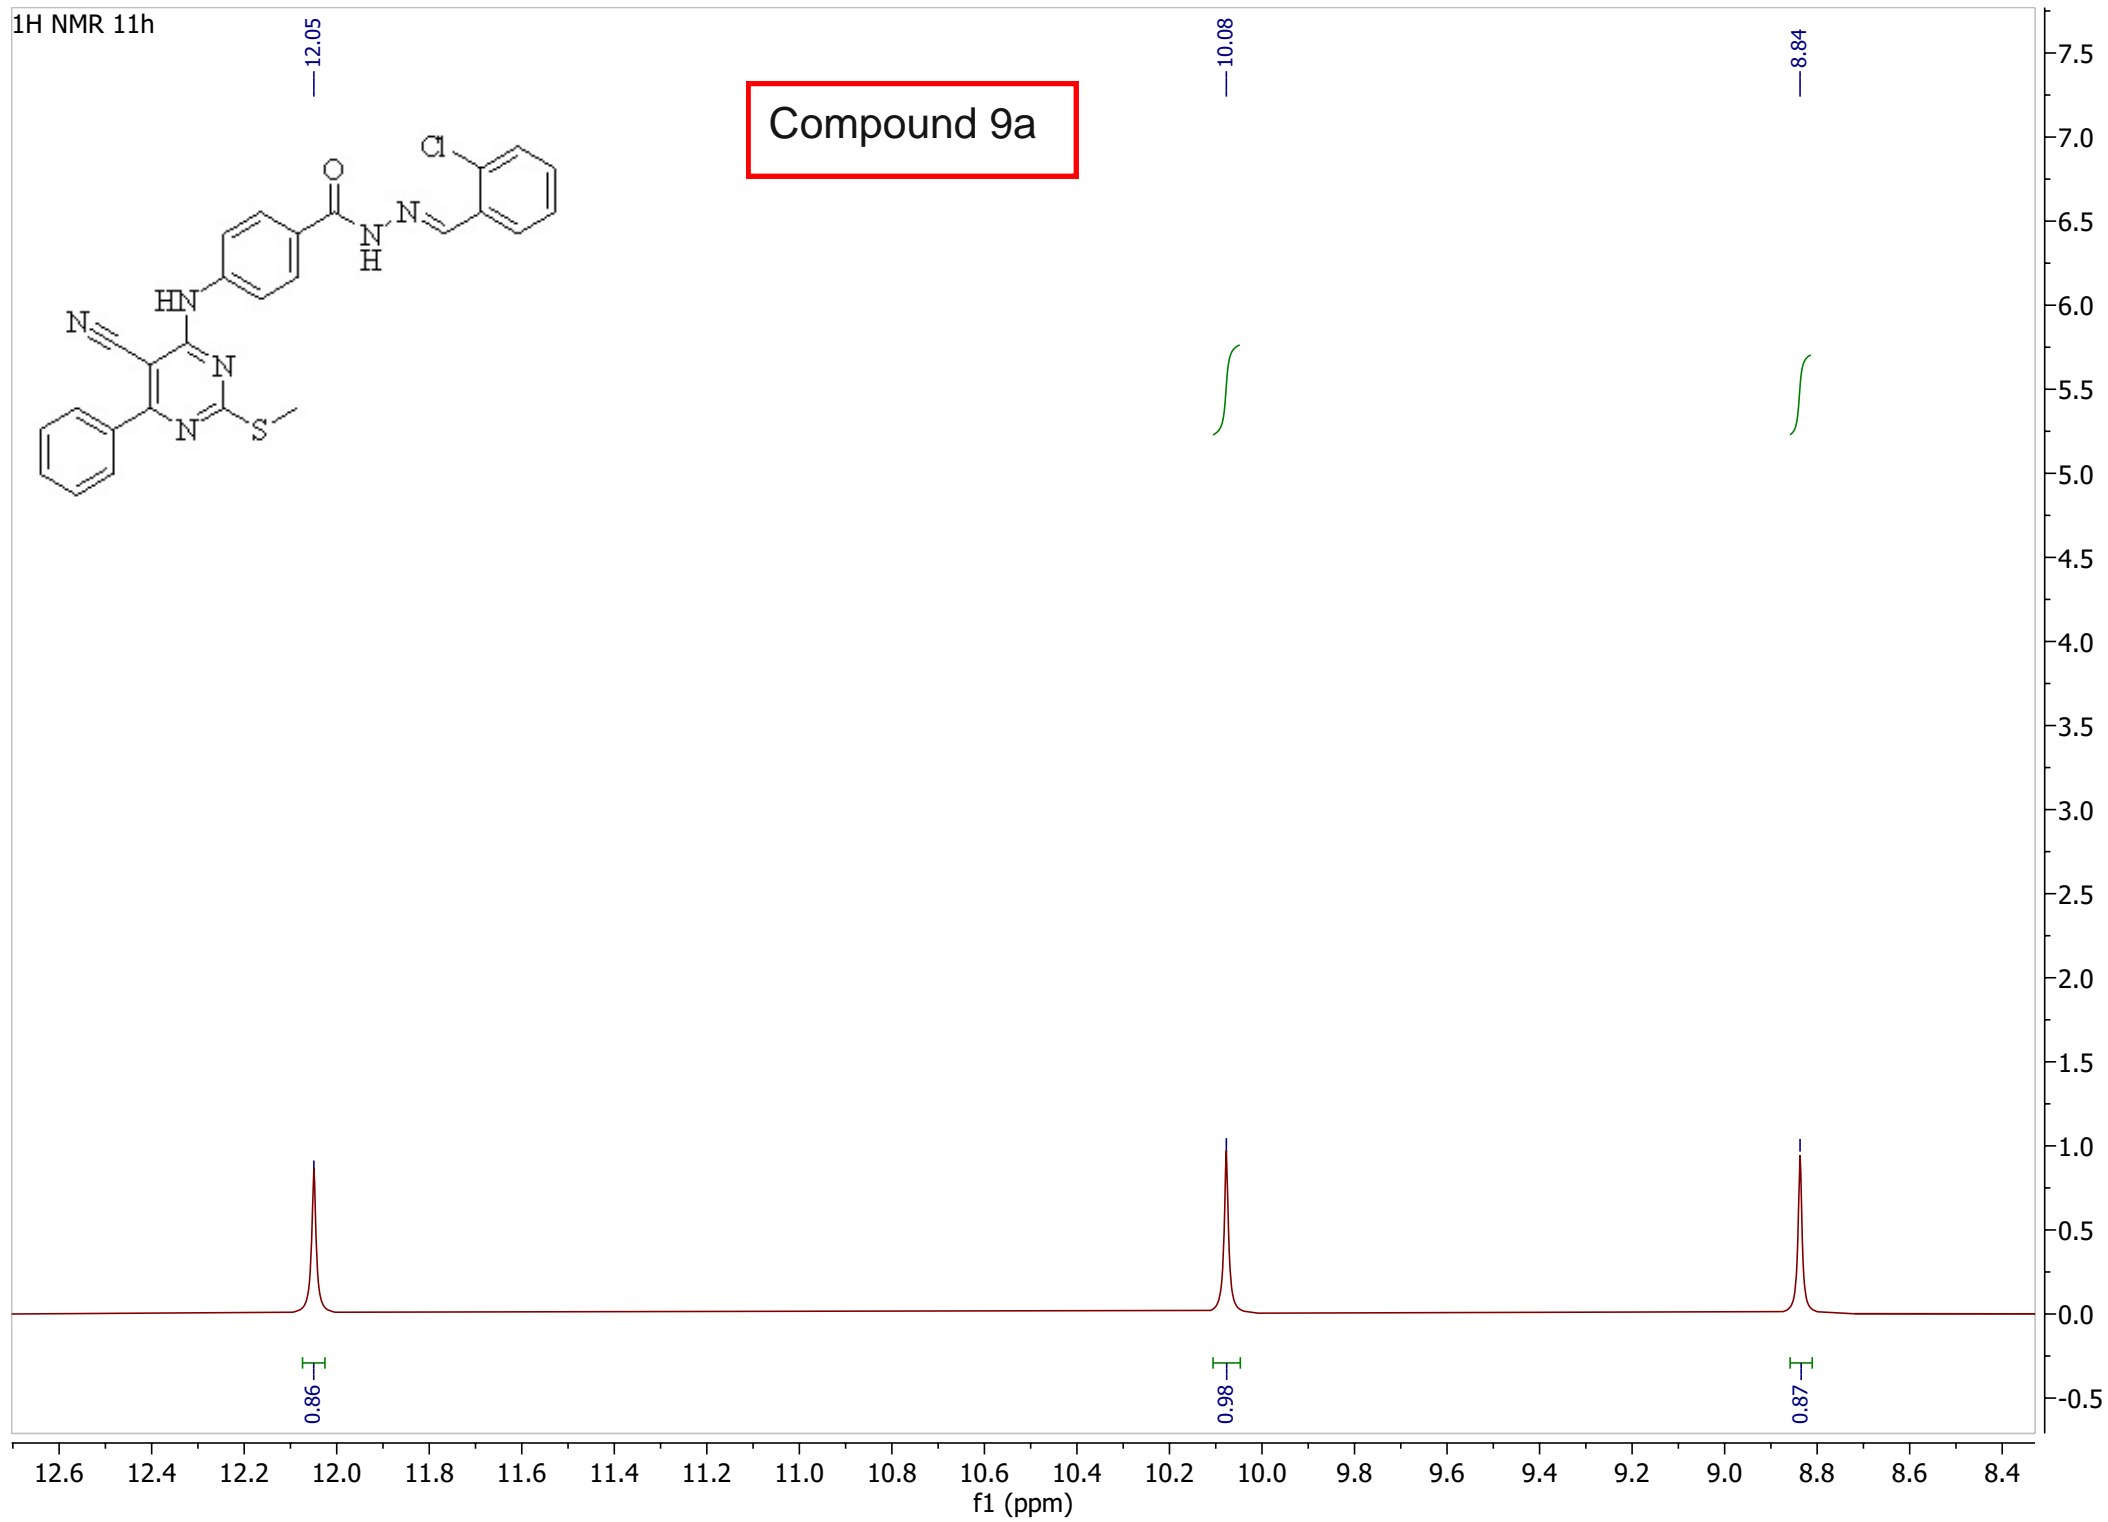

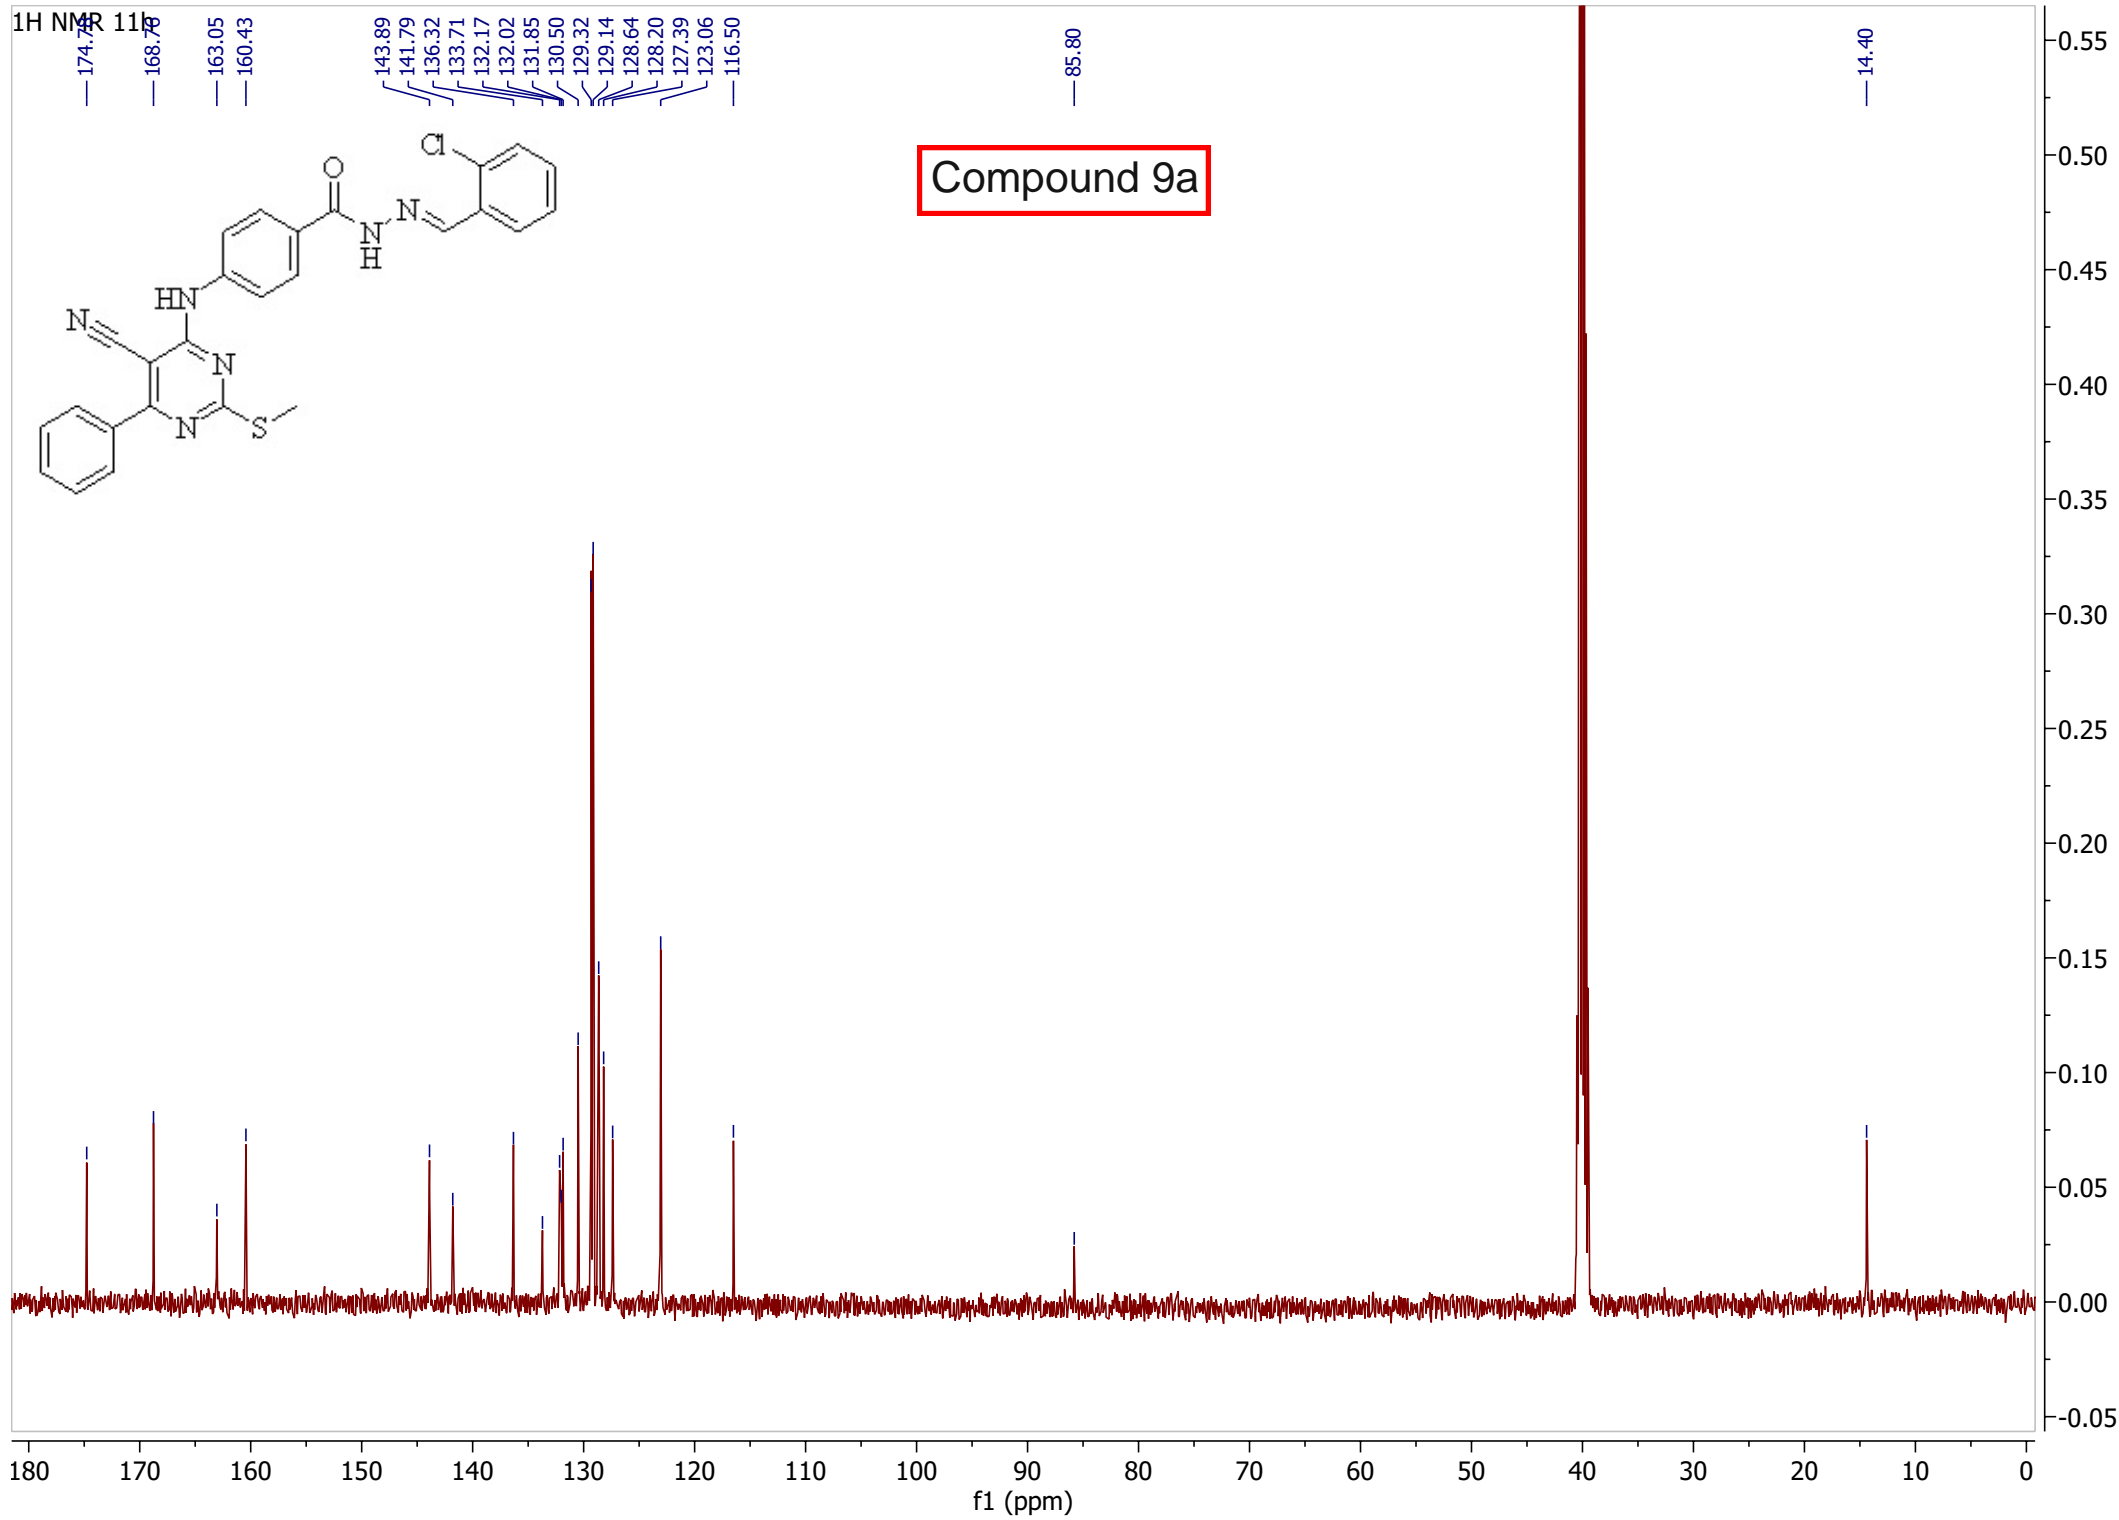

<sup>1</sup>H NMR 11h

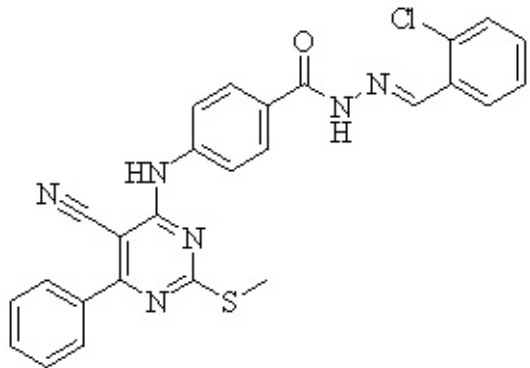

Compound 9a

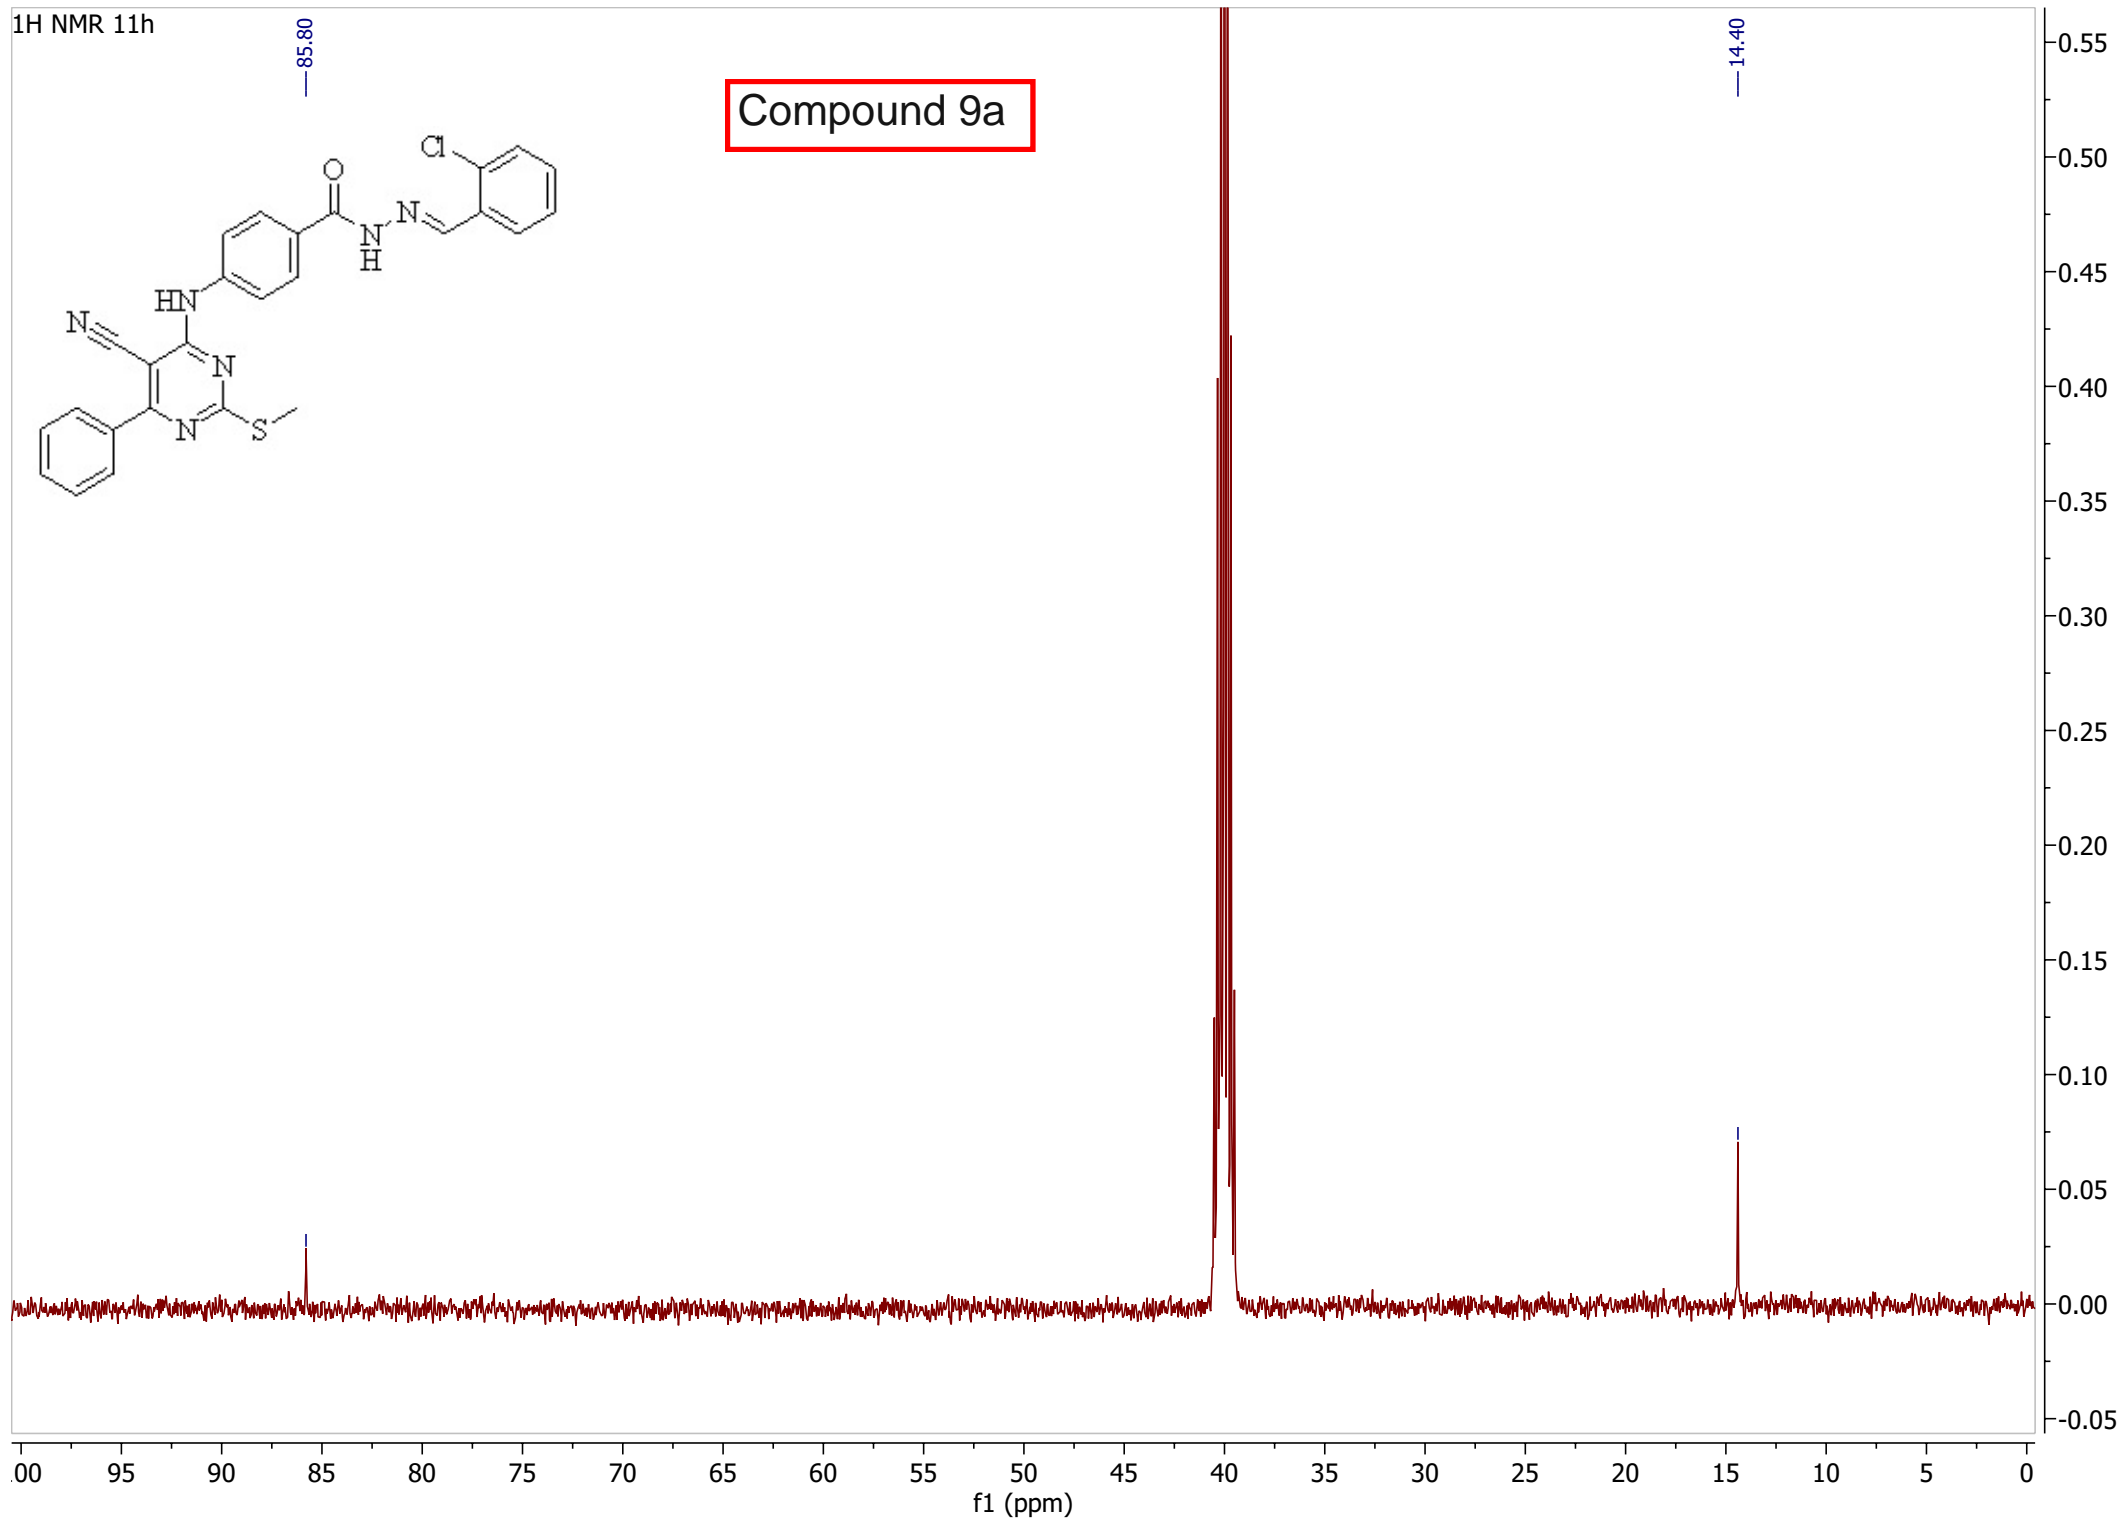

<sup>13</sup>C NMR 11h

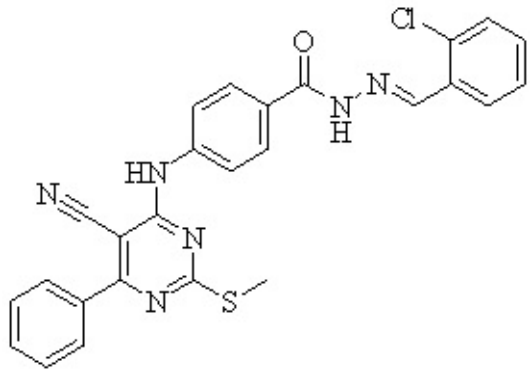

Compound 9a

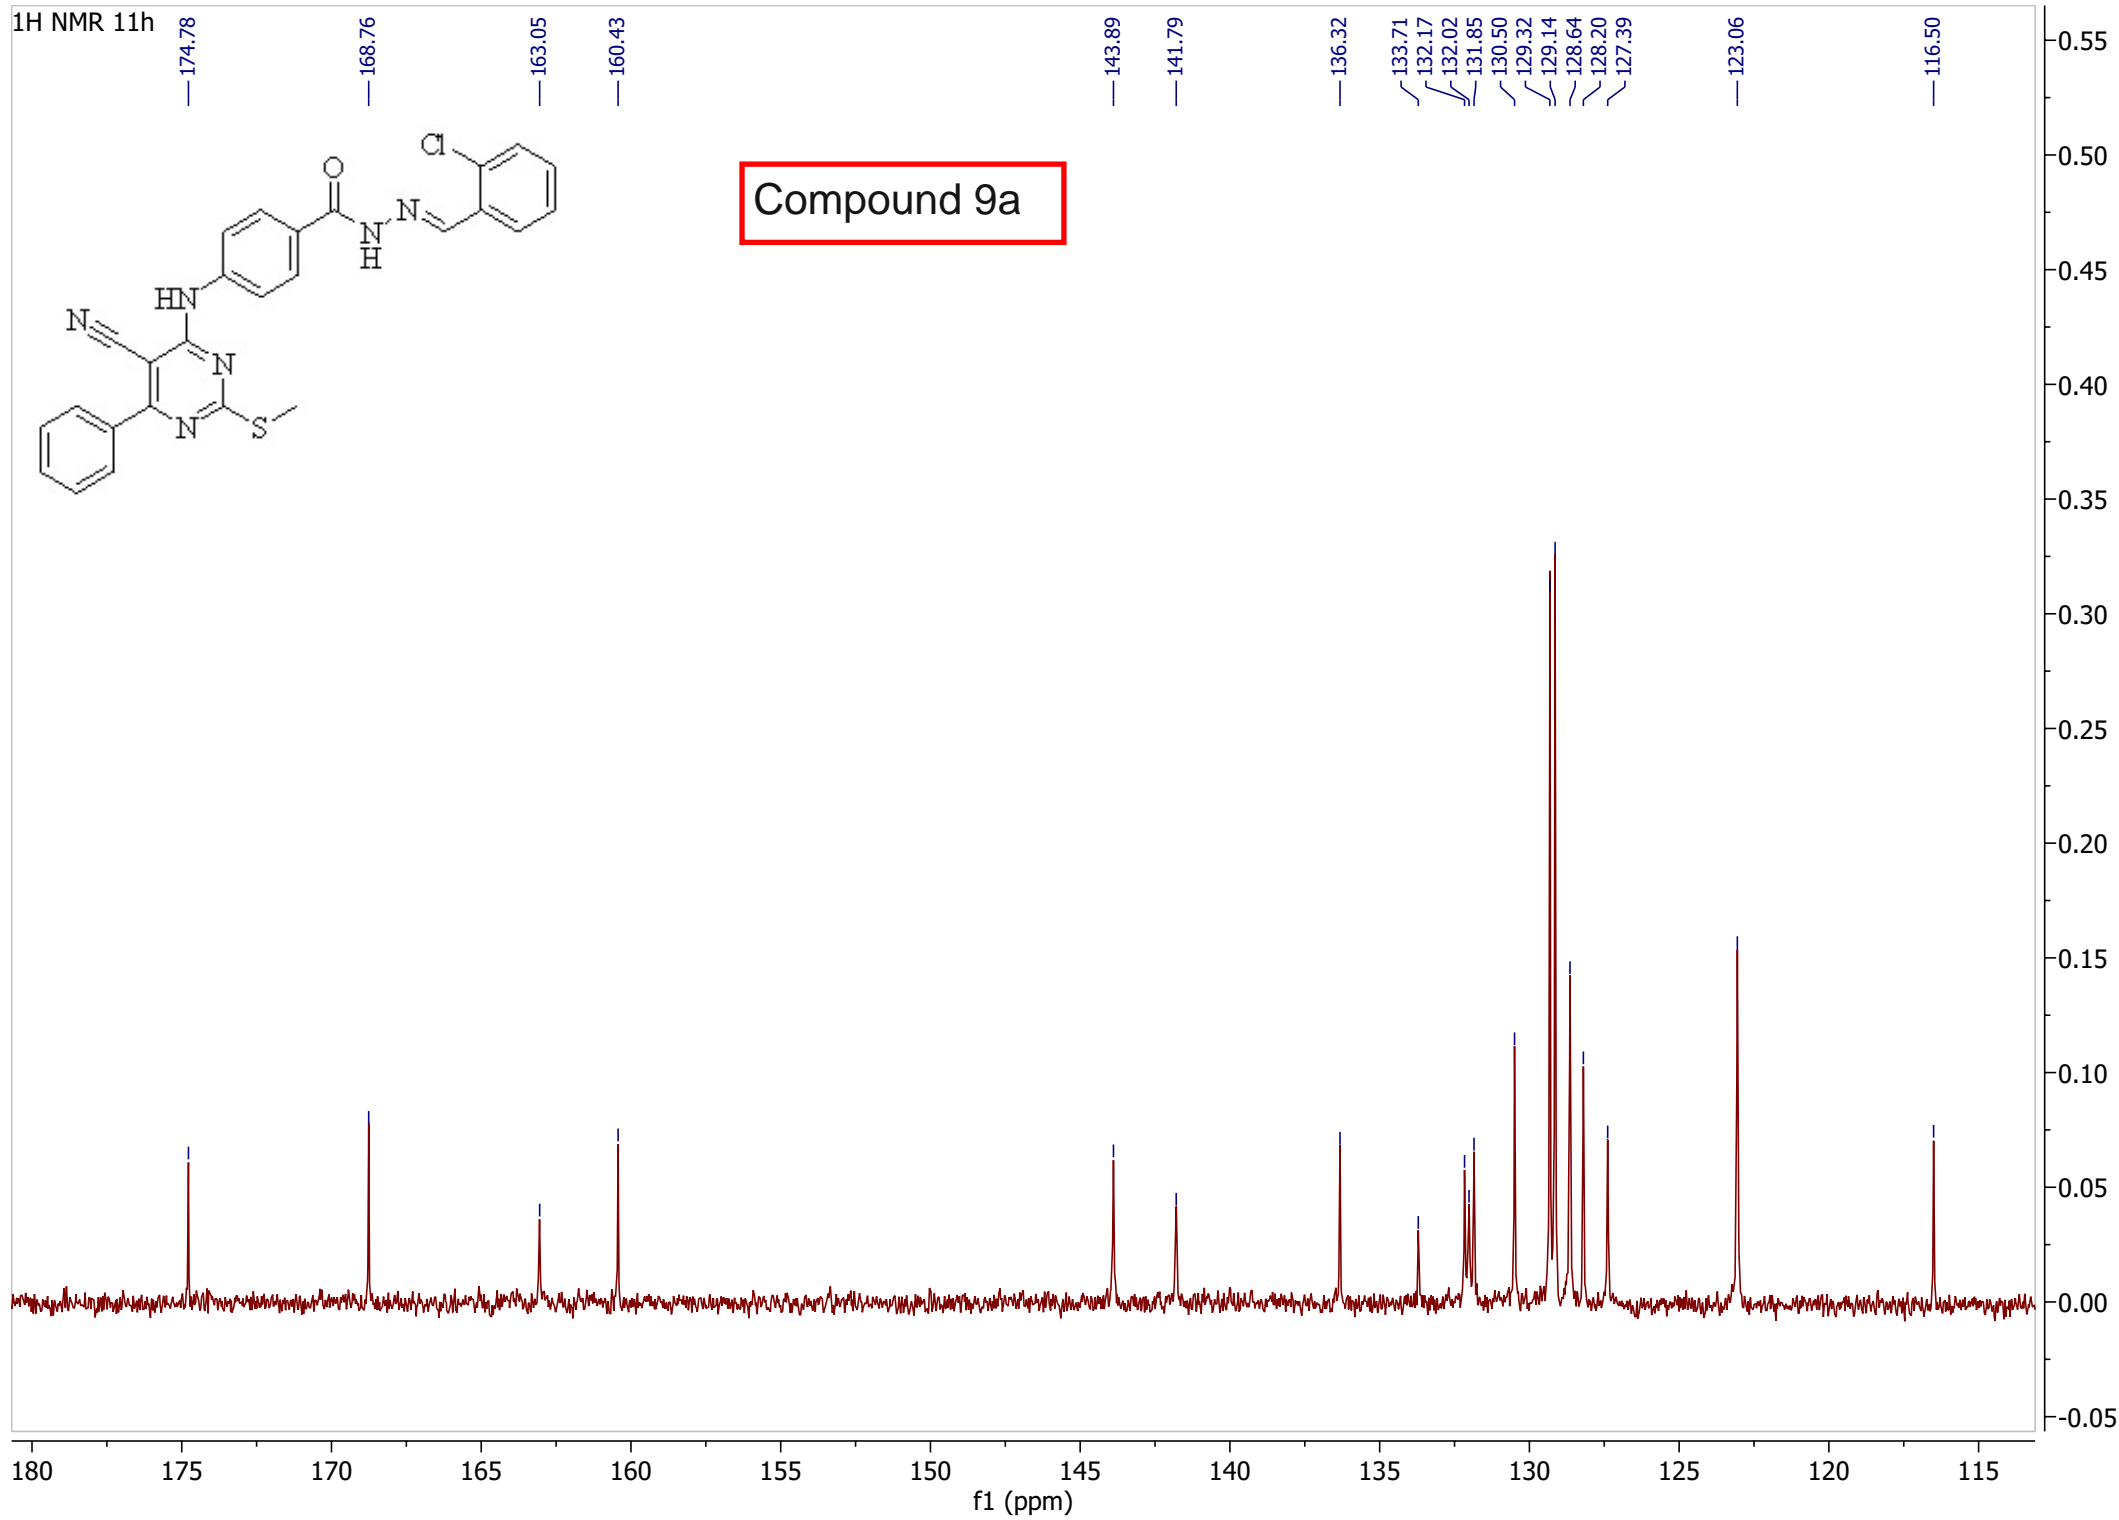

# SAMPLE INFORMATION

|                   |                         |                     |                                 |
|-------------------|-------------------------|---------------------|---------------------------------|
| Sample Name:      | ASL5 <b>Compound 9b</b> | Acquired By:        | System                          |
| Sample Type:      | Unknown                 | Sample Set Name:    |                                 |
| Vial:             | 14                      | Acq. Method Set:    | Organic                         |
| Injection #:      | 1                       | Processing Method:  | Default                         |
| Injection Volume: | 2.00 ul                 | Channel Name:       | 320.0nm                         |
| Run Time:         | 14.0 Minutes            | Proc. Chnl. Descr.: | W2996 FDA 320.0 nm(FDA 190.0 to |

Date Acquired: 11/6/2022 5:18:18 AMEET  
 Date Processed: 11/6/2022 5:33:06 AMEET

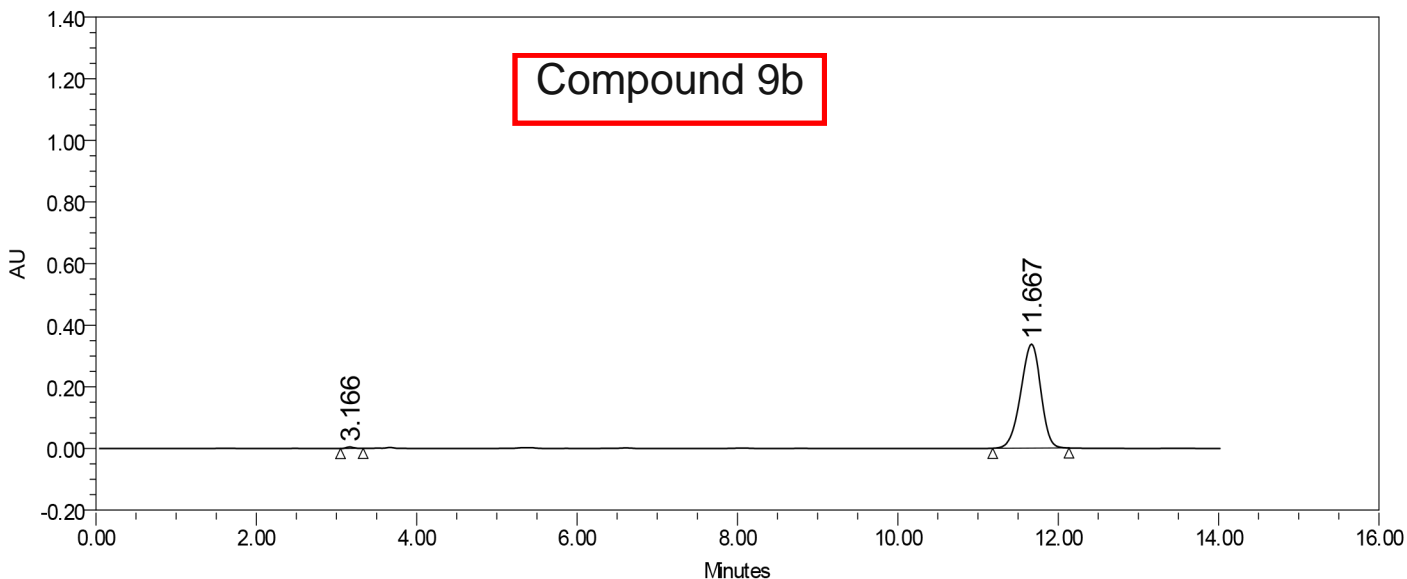

|   | RT     | Area    | % Area | Height |
|---|--------|---------|--------|--------|
| 1 | 3.166  | 27922   | 0.47   | 4657   |
| 2 | 11.667 | 5852346 | 99.53  | 337582 |

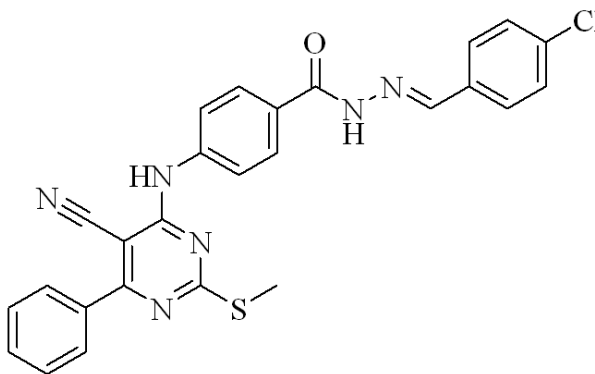

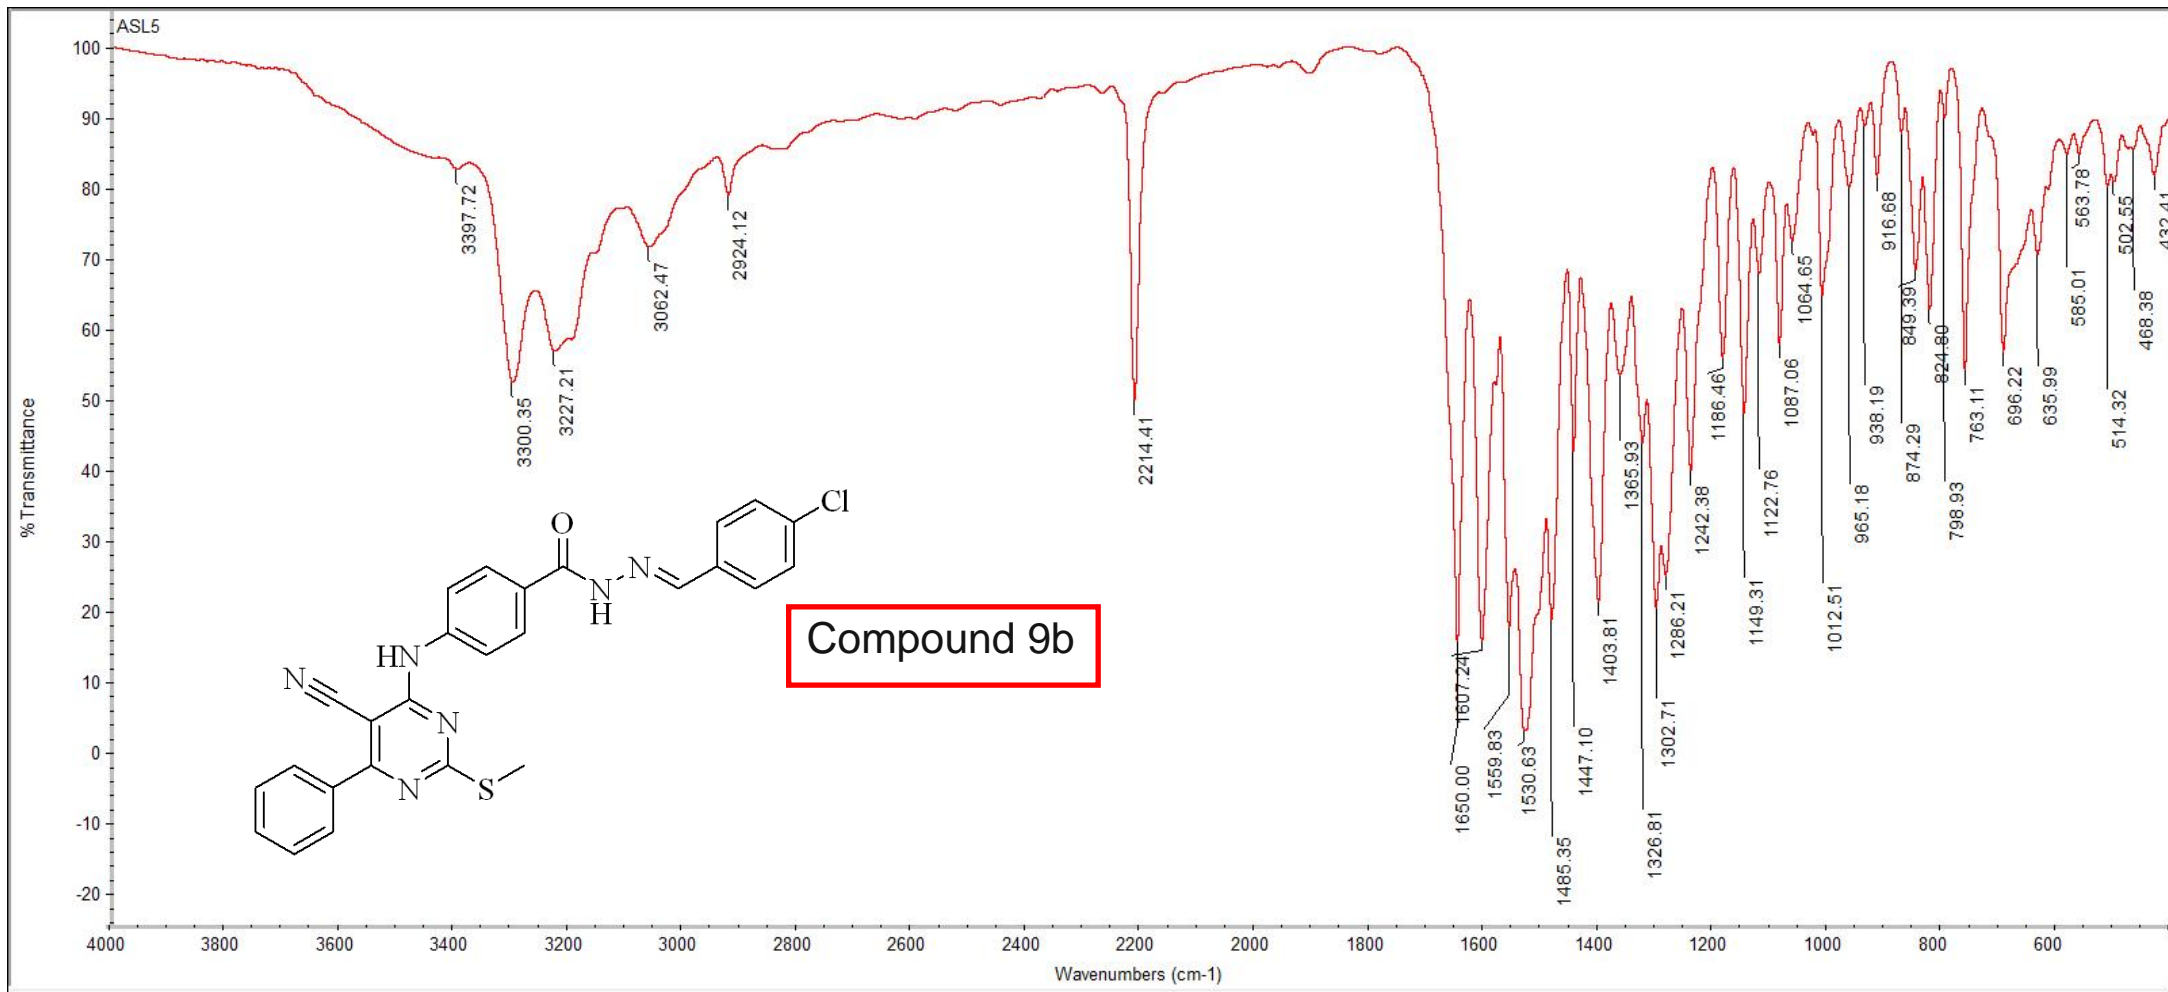

<sup>1</sup>H NMR 11h

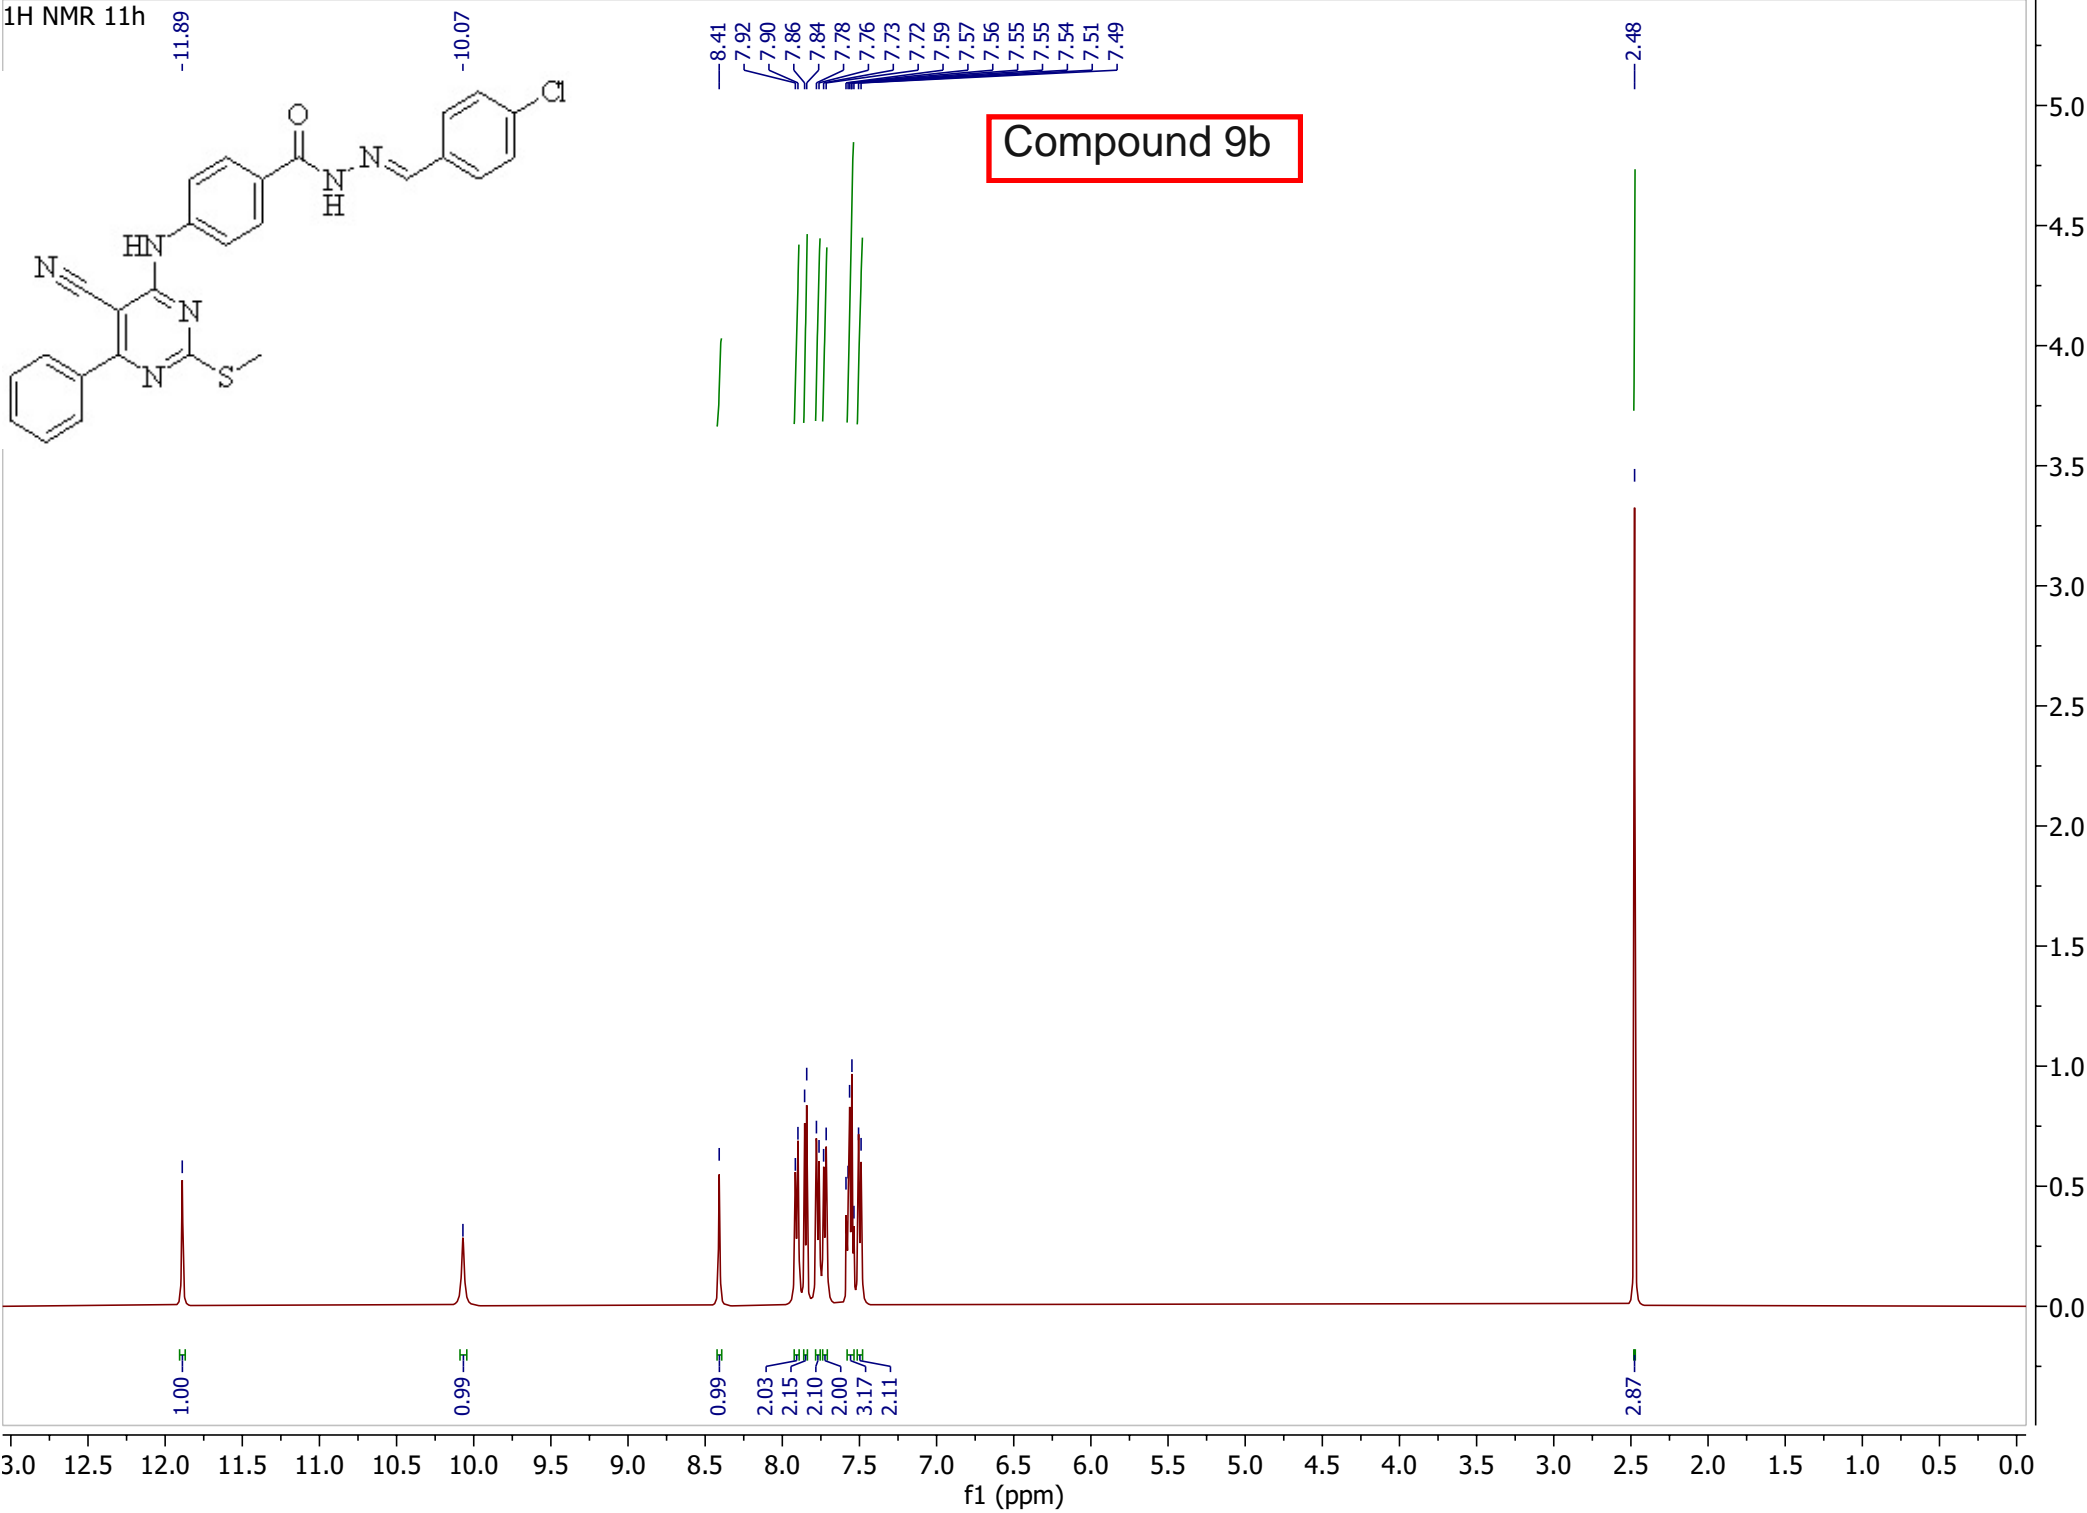

<sup>1</sup>H NMR 11h

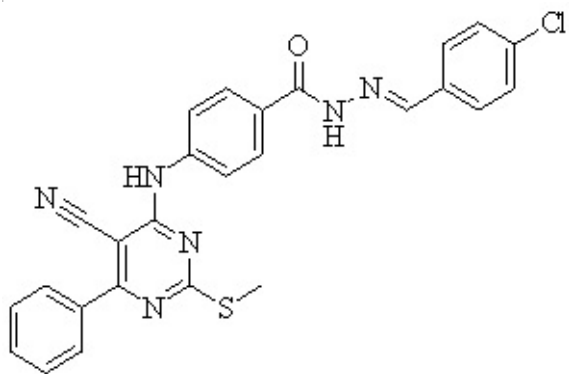

Compound 9b

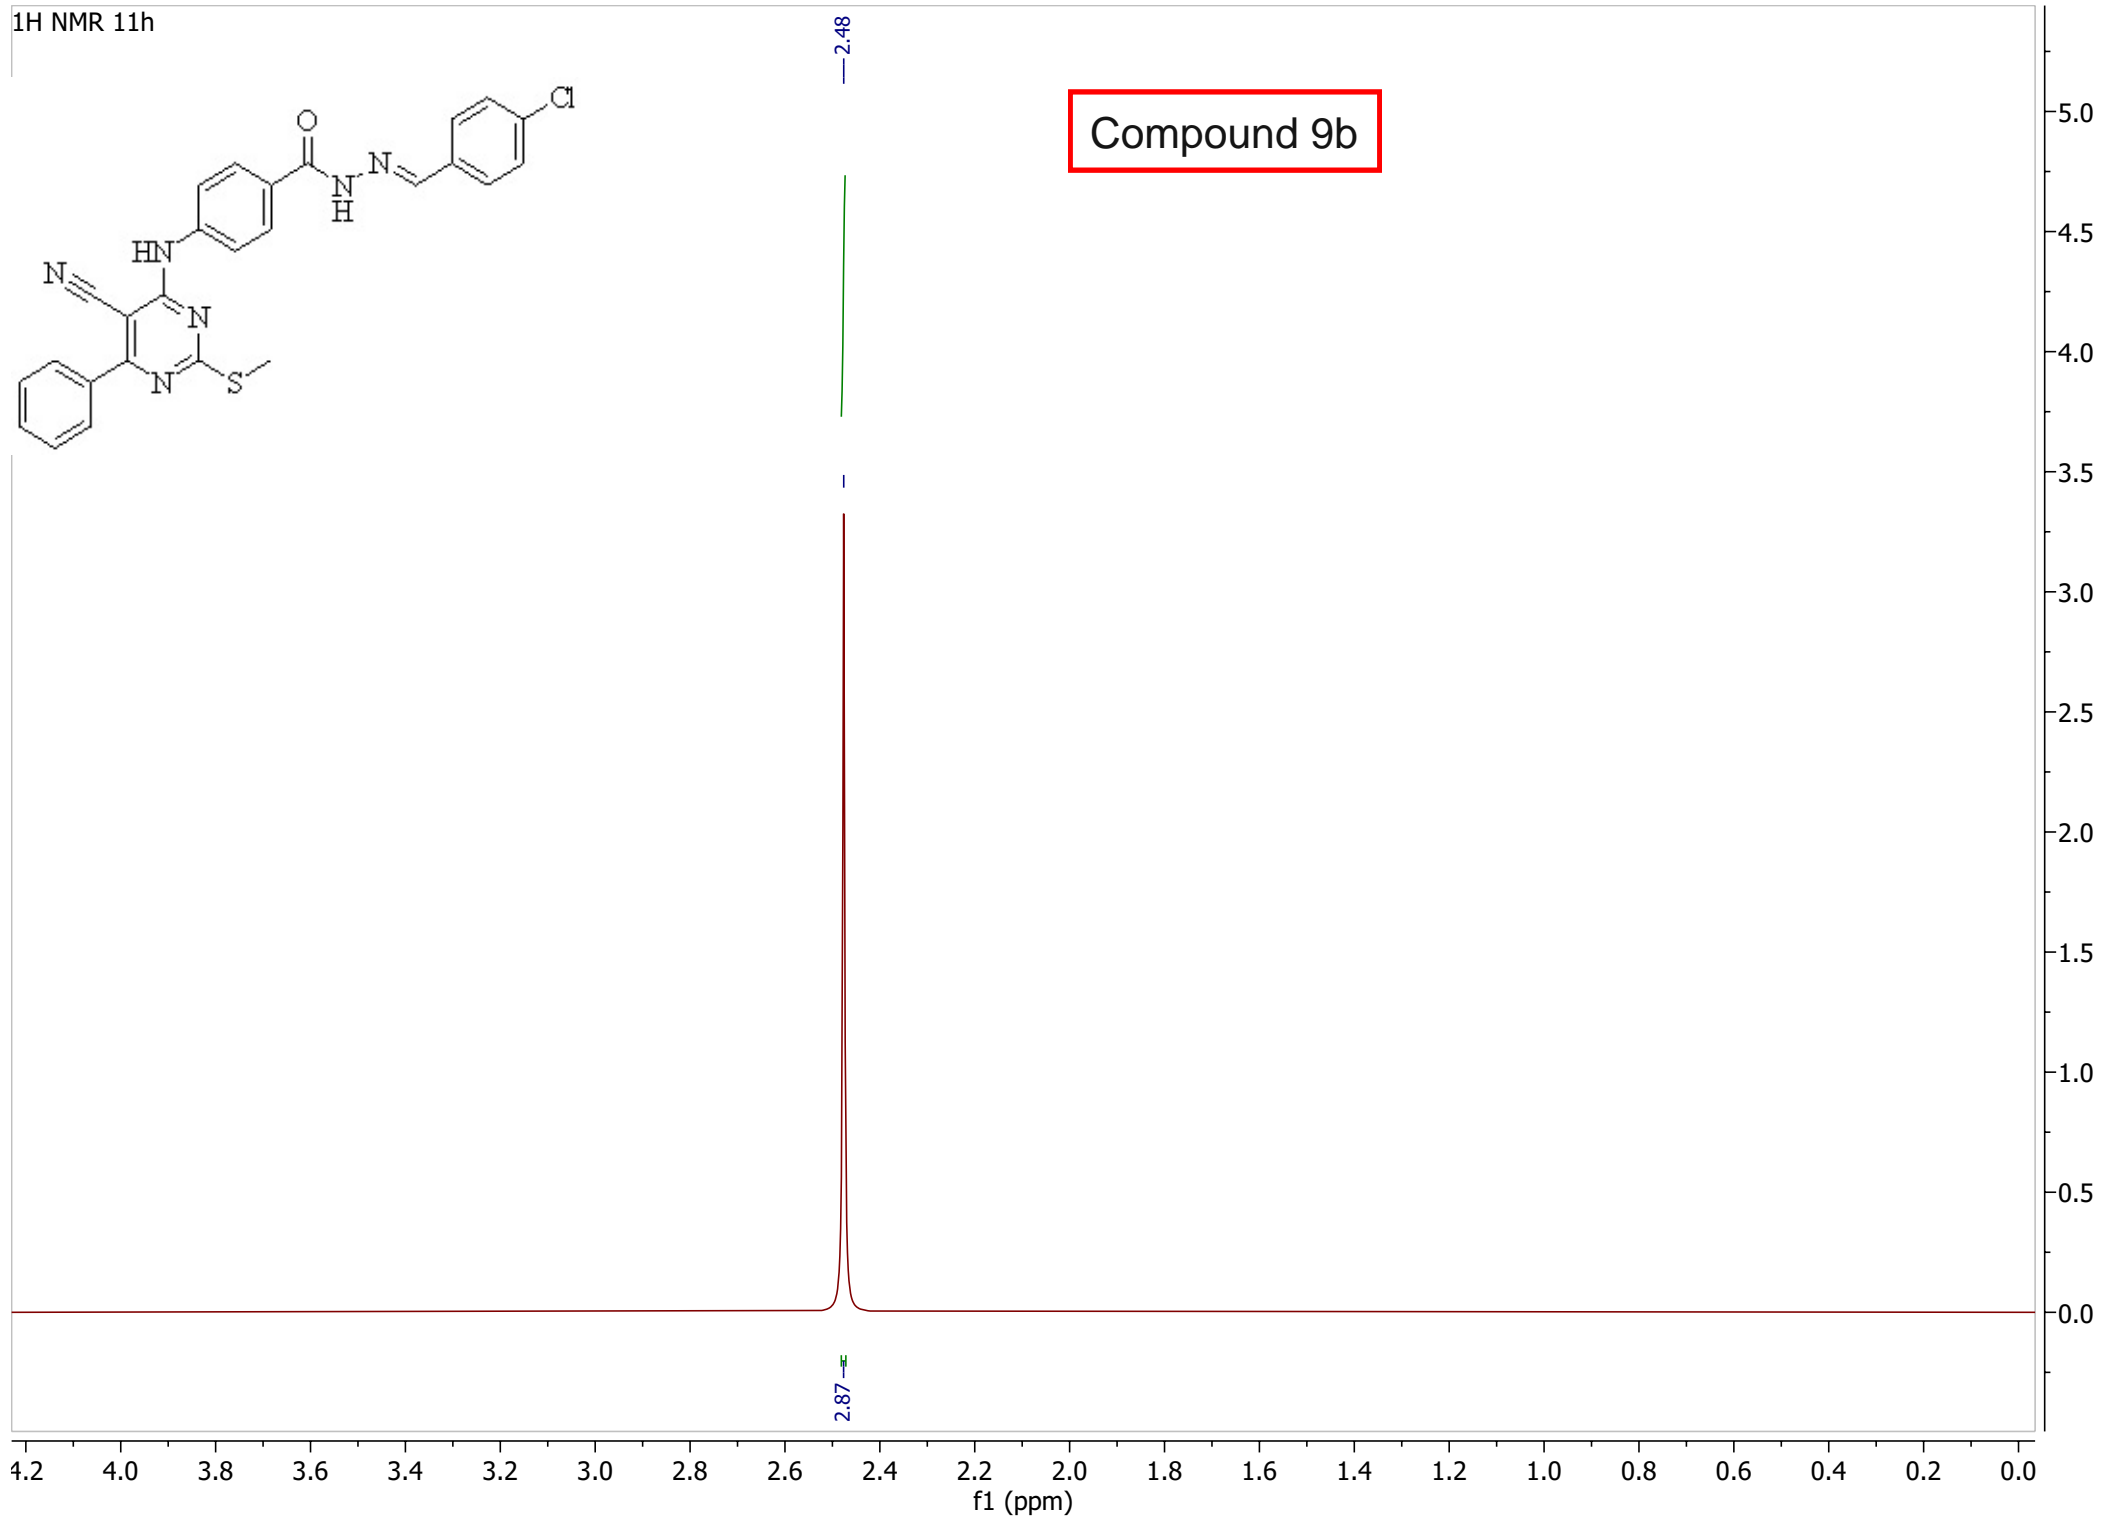



<sup>1</sup>H NMR 11h

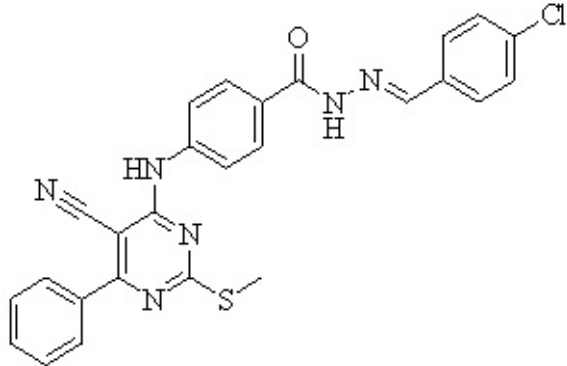

Compound 9b

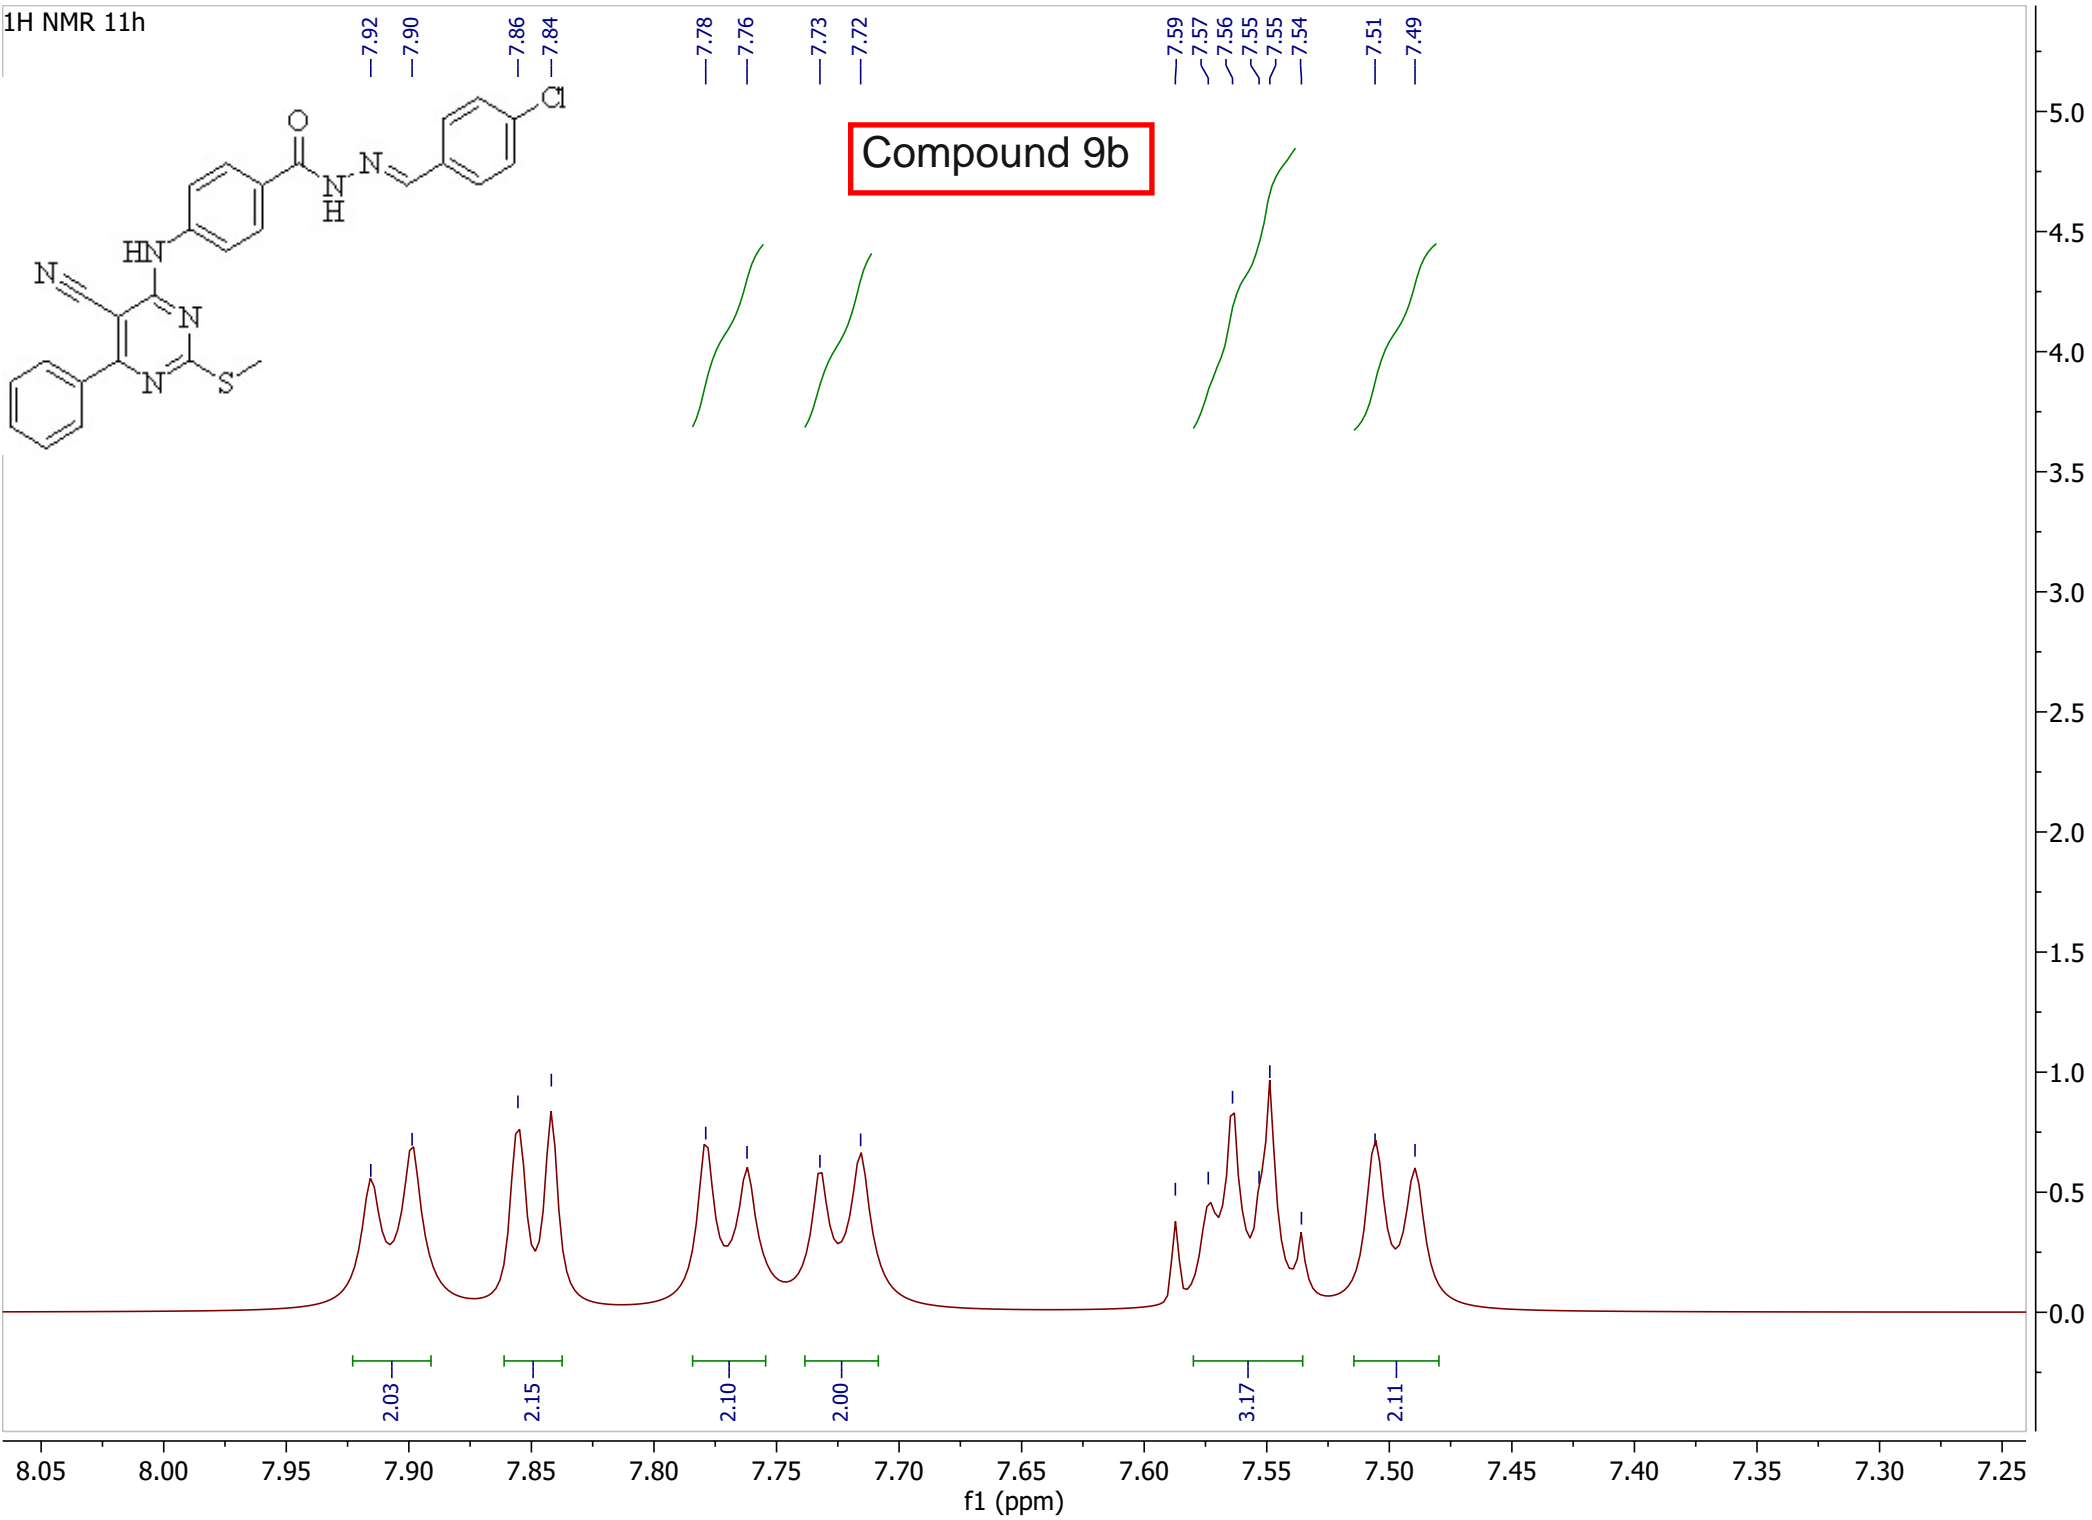

<sup>1</sup>H NMR 11h

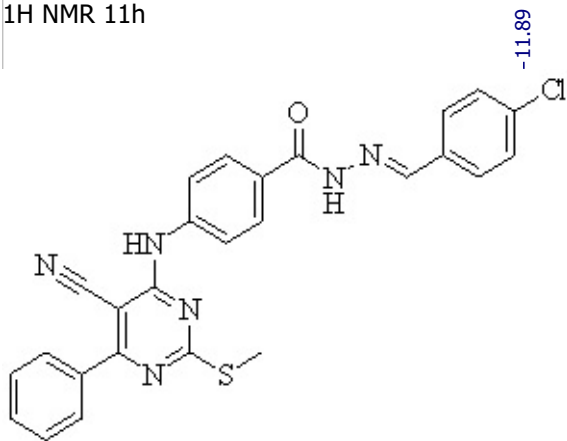

Compound 9b

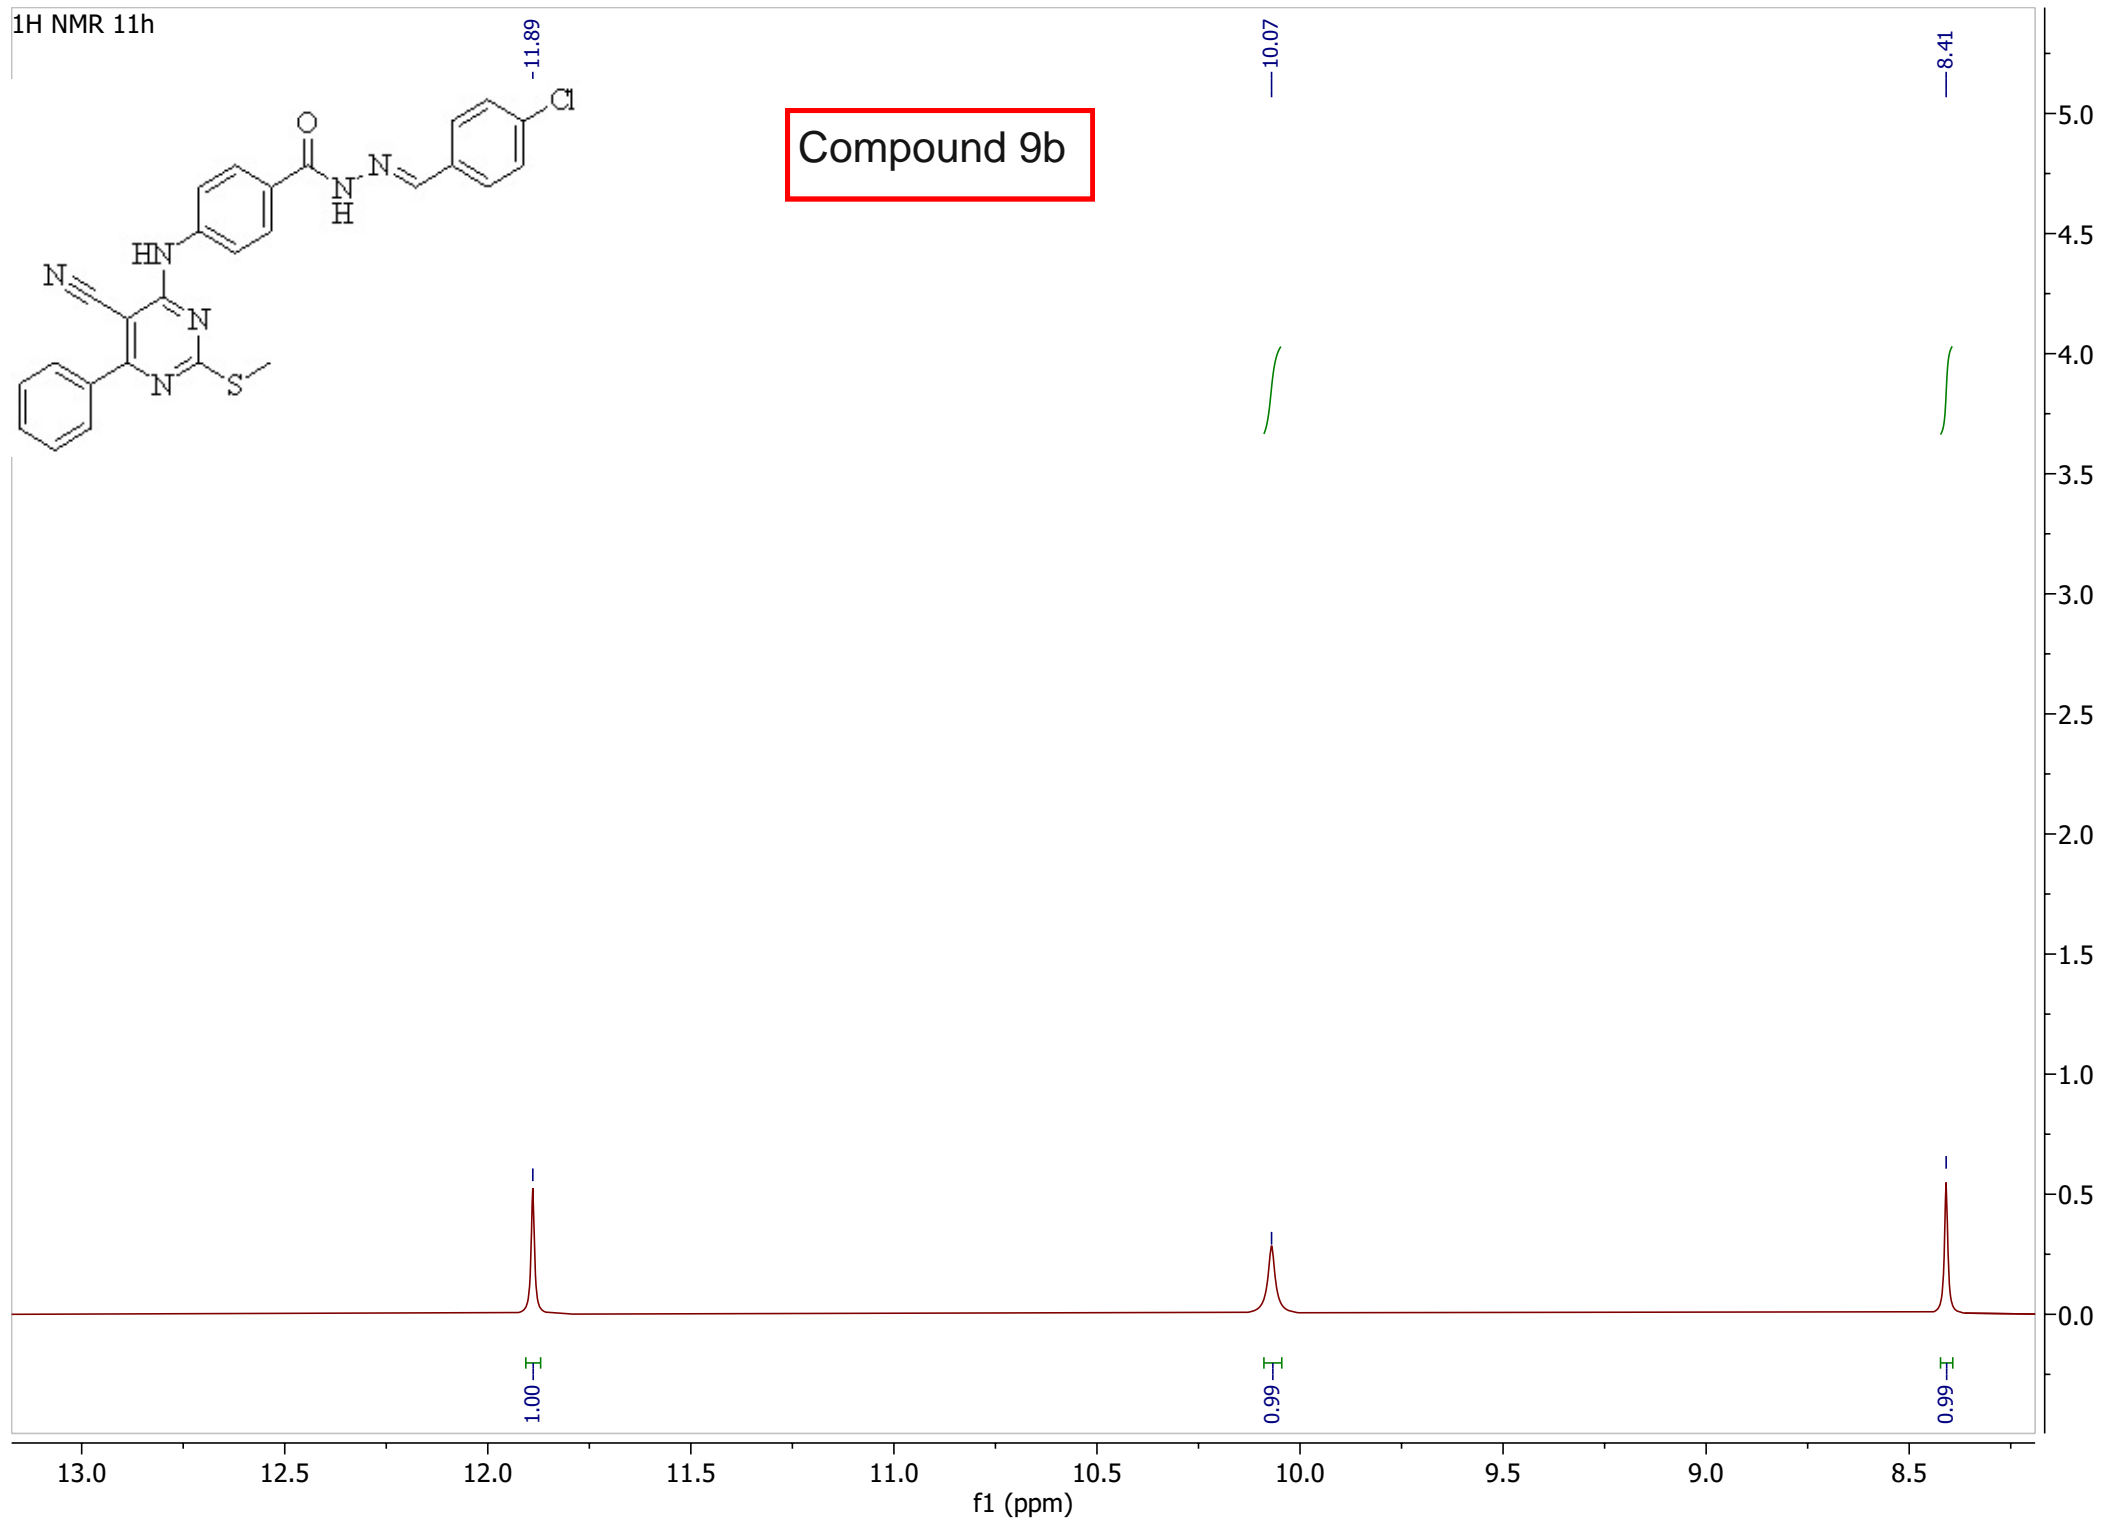

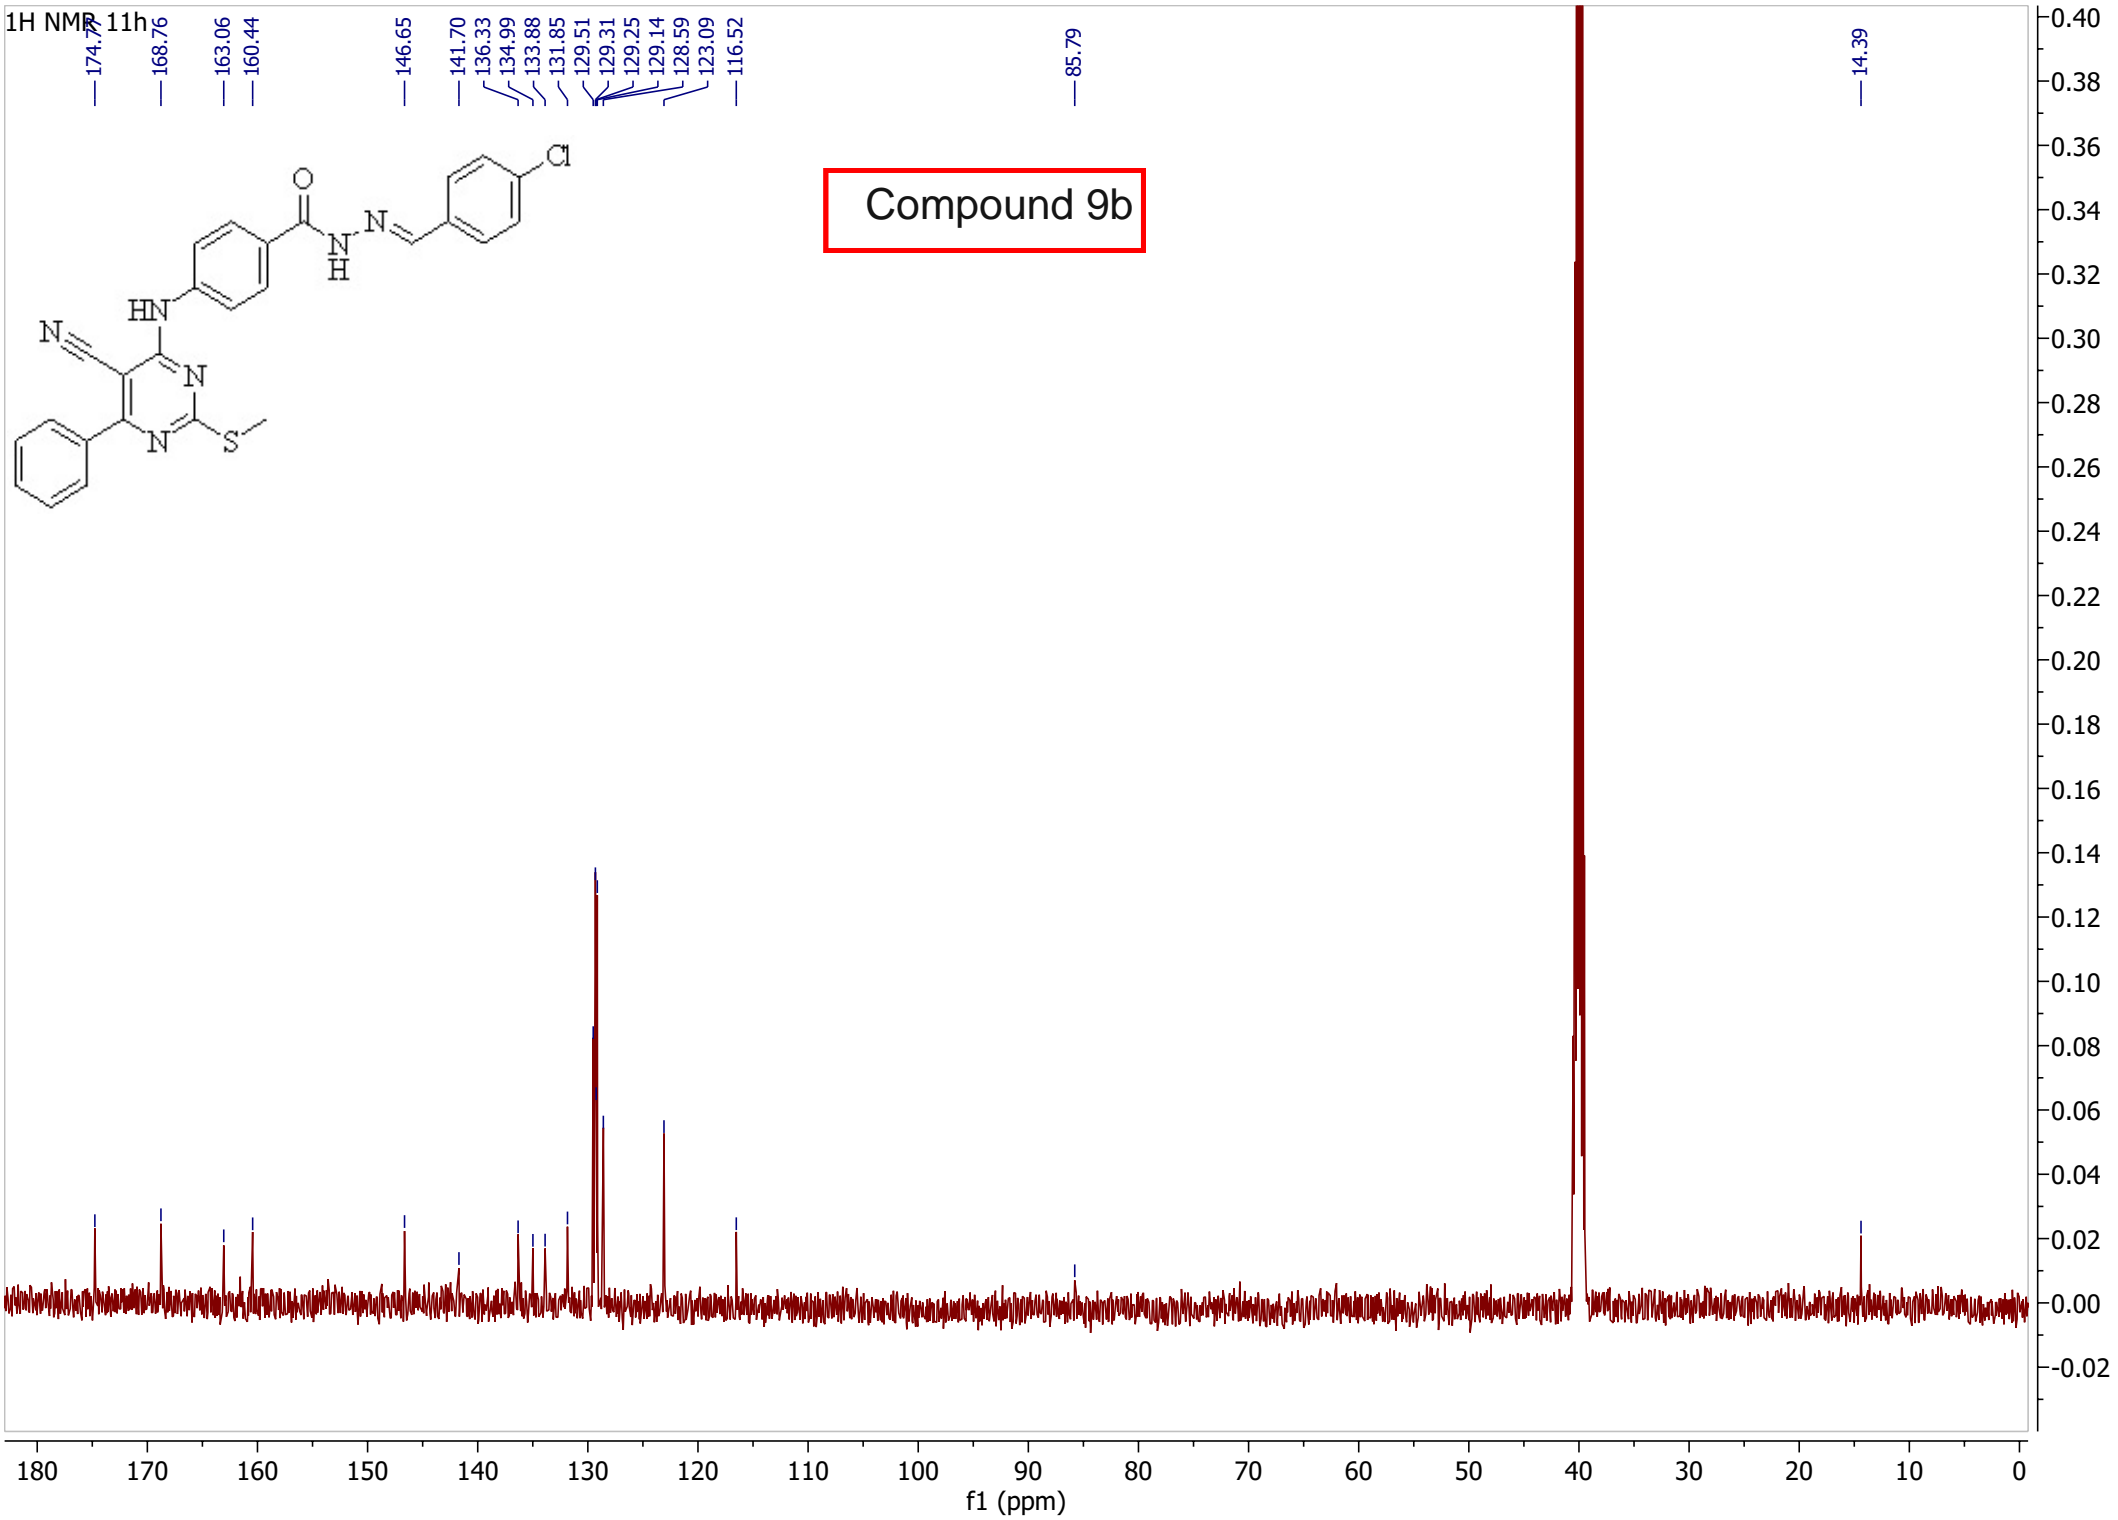

<sup>1</sup>H NMR 1H

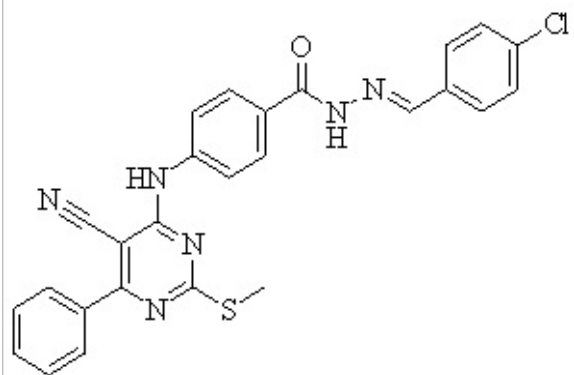

Compound 9b

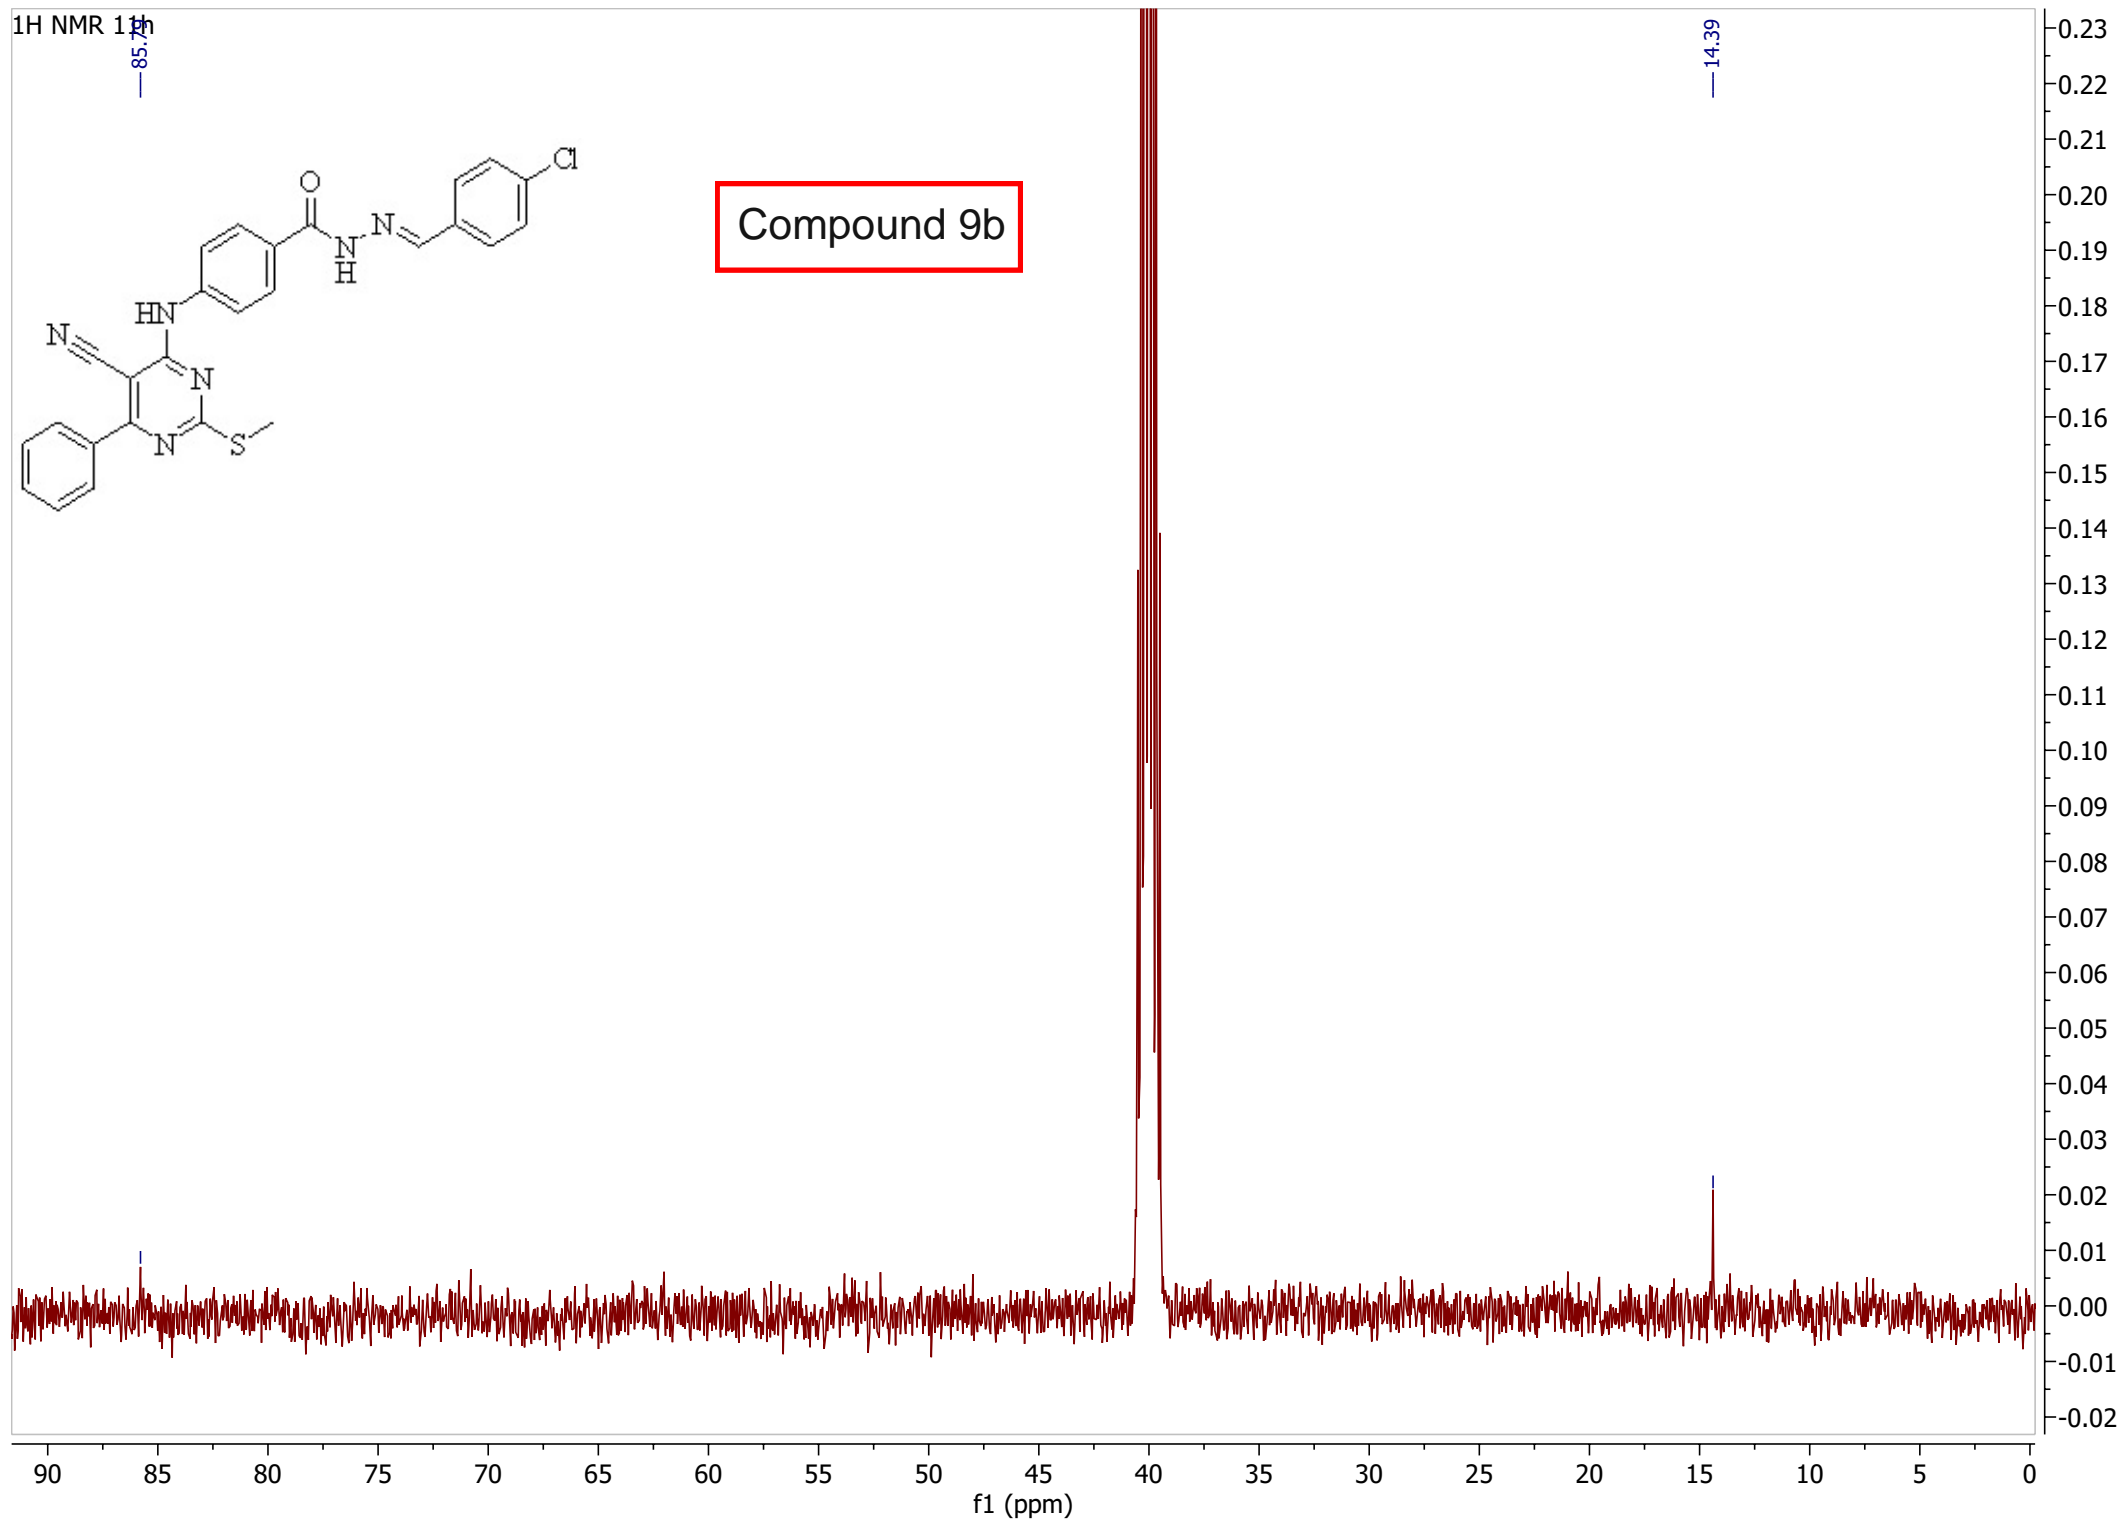

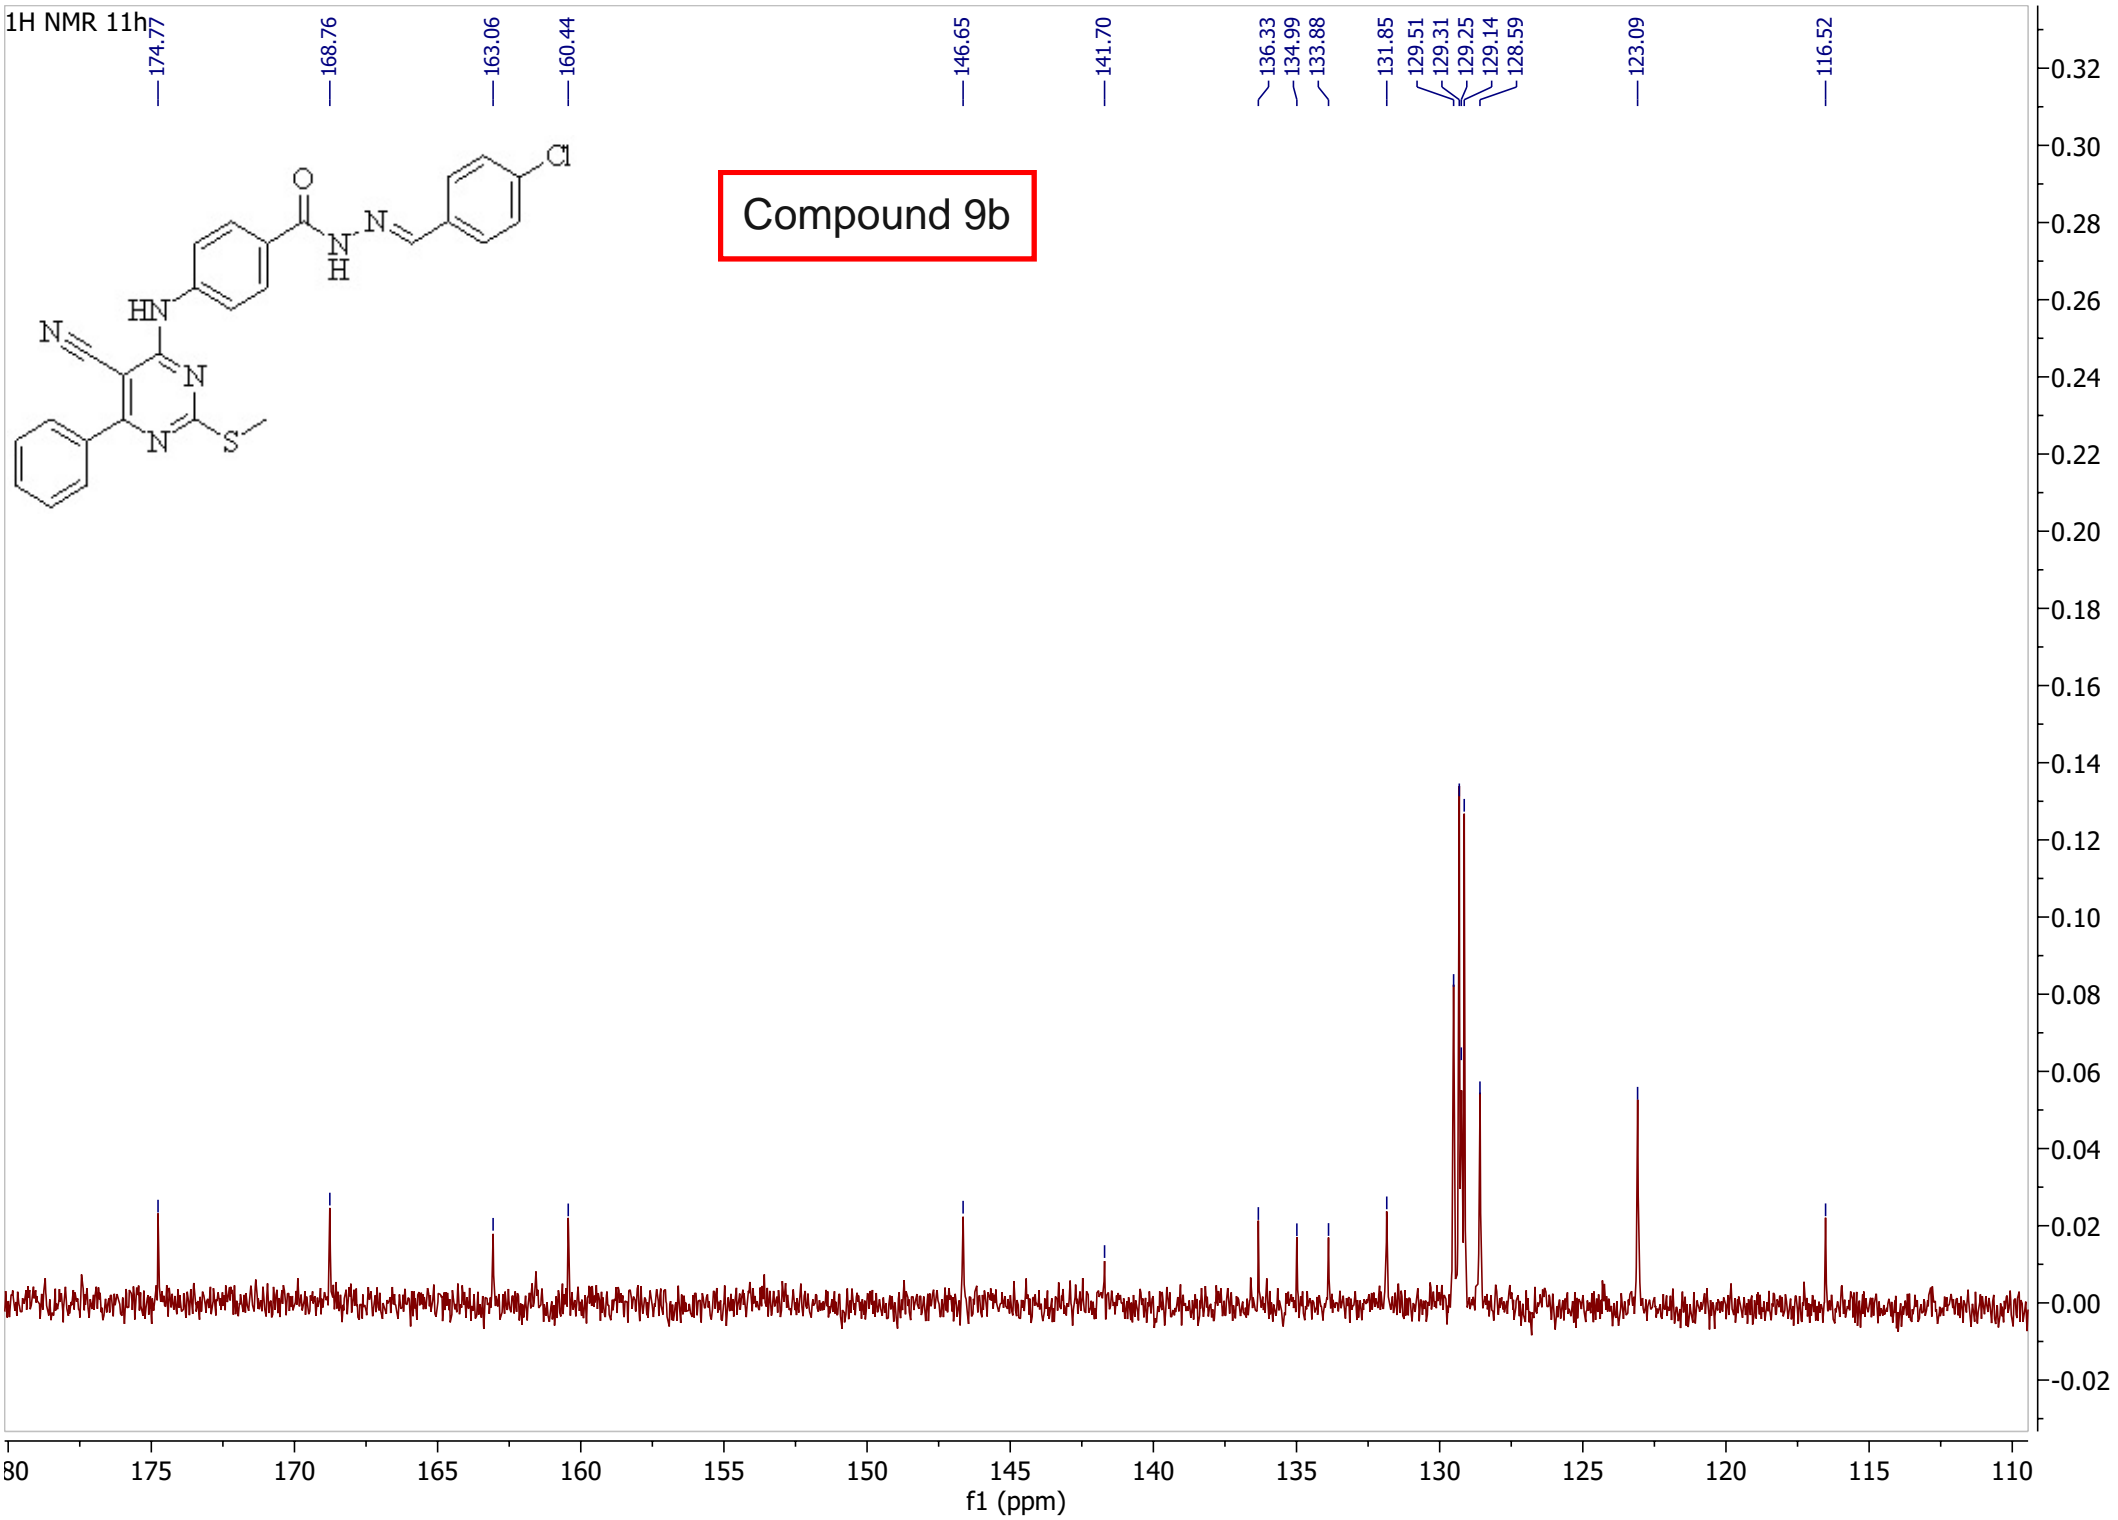

RT: 3.94 - 4.35 SM: 11B

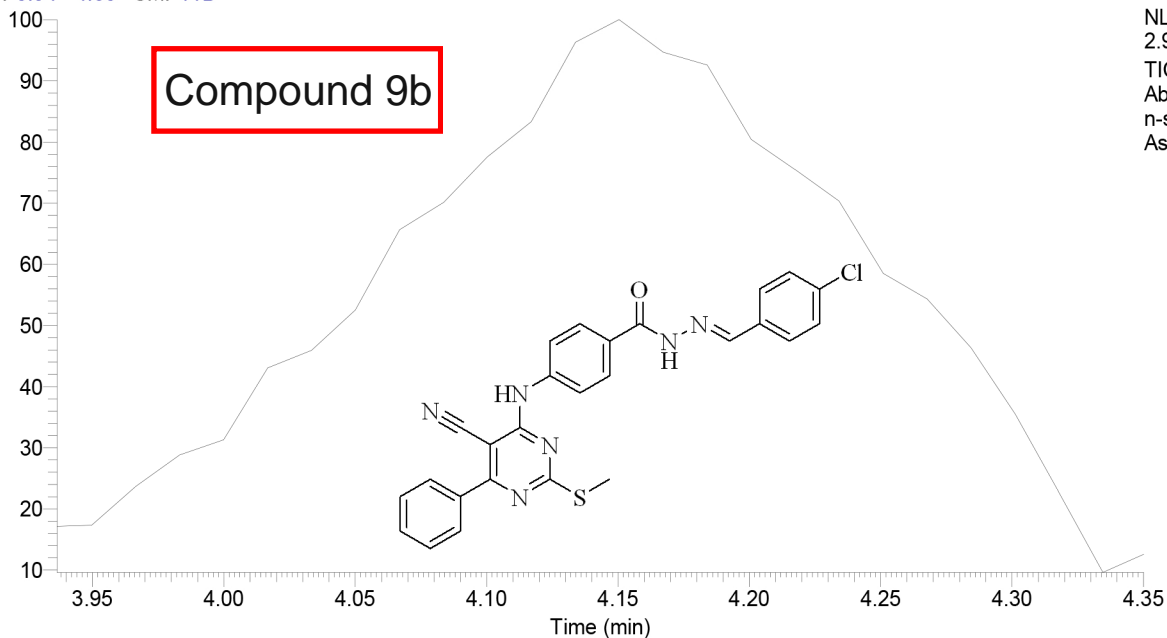

NL:  
2.90E4  
TIC MS  
Abdelrahman  
n-saleh-  
AsL5

Abdelrahman-saleh-AsL5 #135-138 RT: 2.28-2.33 AV: 4 SB: 26 1.21-1.34 , 0.87-1.14 NL: 8.87E1  
T: + c EI Full ms [40.00-1000.00]

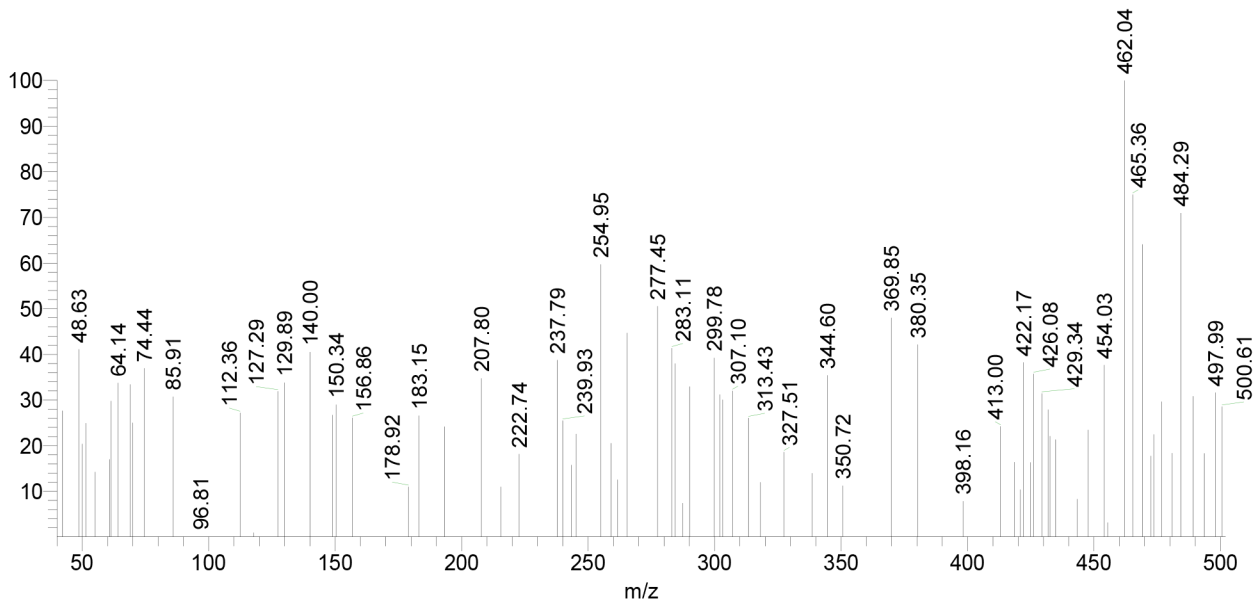

# SAMPLE INFORMATION

|                   |                         |                     |                                 |
|-------------------|-------------------------|---------------------|---------------------------------|
| Sample Name:      | ASL4 <b>Compound 9c</b> | Acquired By:        | System                          |
| Sample Type:      | Unknown                 | Sample Set Name:    |                                 |
| Vial:             | 13                      | Acq. Method Set:    | Organic                         |
| Injection #:      | 1                       | Processing Method:  | Default                         |
| Injection Volume: | 2.00 ul                 | Channel Name:       | 261.4nm                         |
| Run Time:         | 14.0 Minutes            | Proc. Chnl. Descr.: | W2996 FDA 261.4 nm(FDA 190.0 to |

Date Acquired: 11/6/2022 6:18:22 AMEET  
 Date Processed: 11/6/2022 6:33:43 AMEET

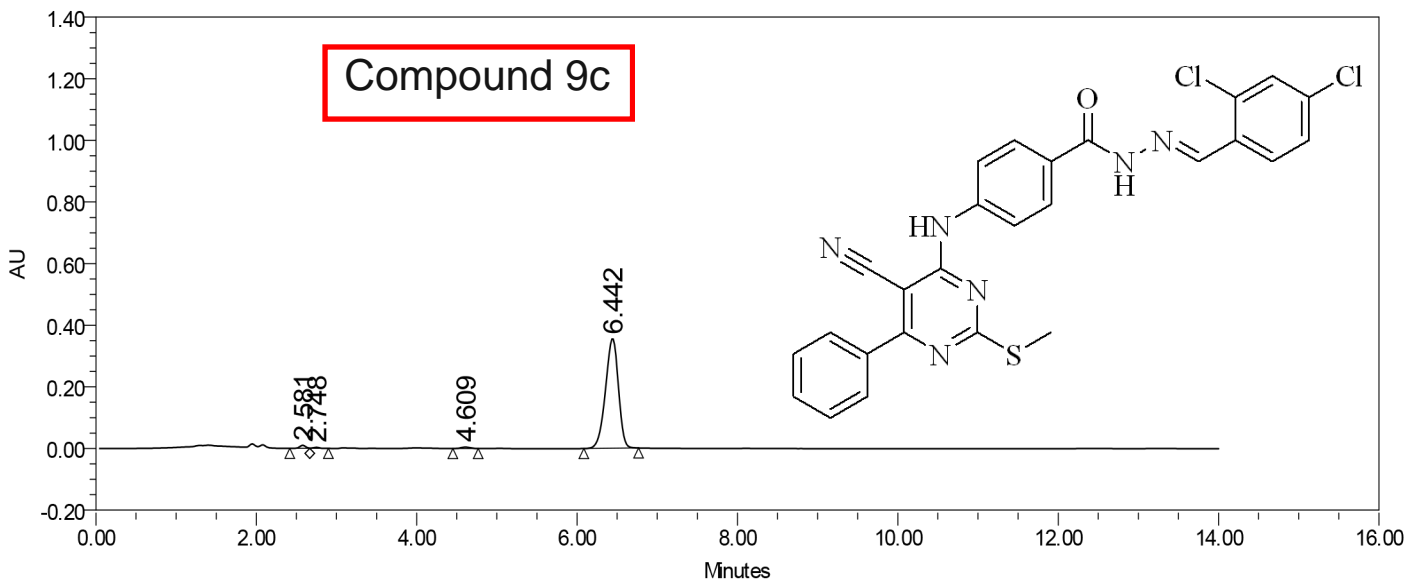

|   | RT    | Area    | % Area | Height |
|---|-------|---------|--------|--------|
| 1 | 2.581 | 50406   | 1.23   | 9675   |
| 2 | 2.748 | 17187   | 0.42   | 3193   |
| 3 | 4.609 | 36709   | 0.89   | 4451   |
| 4 | 6.442 | 3997303 | 97.46  | 355748 |

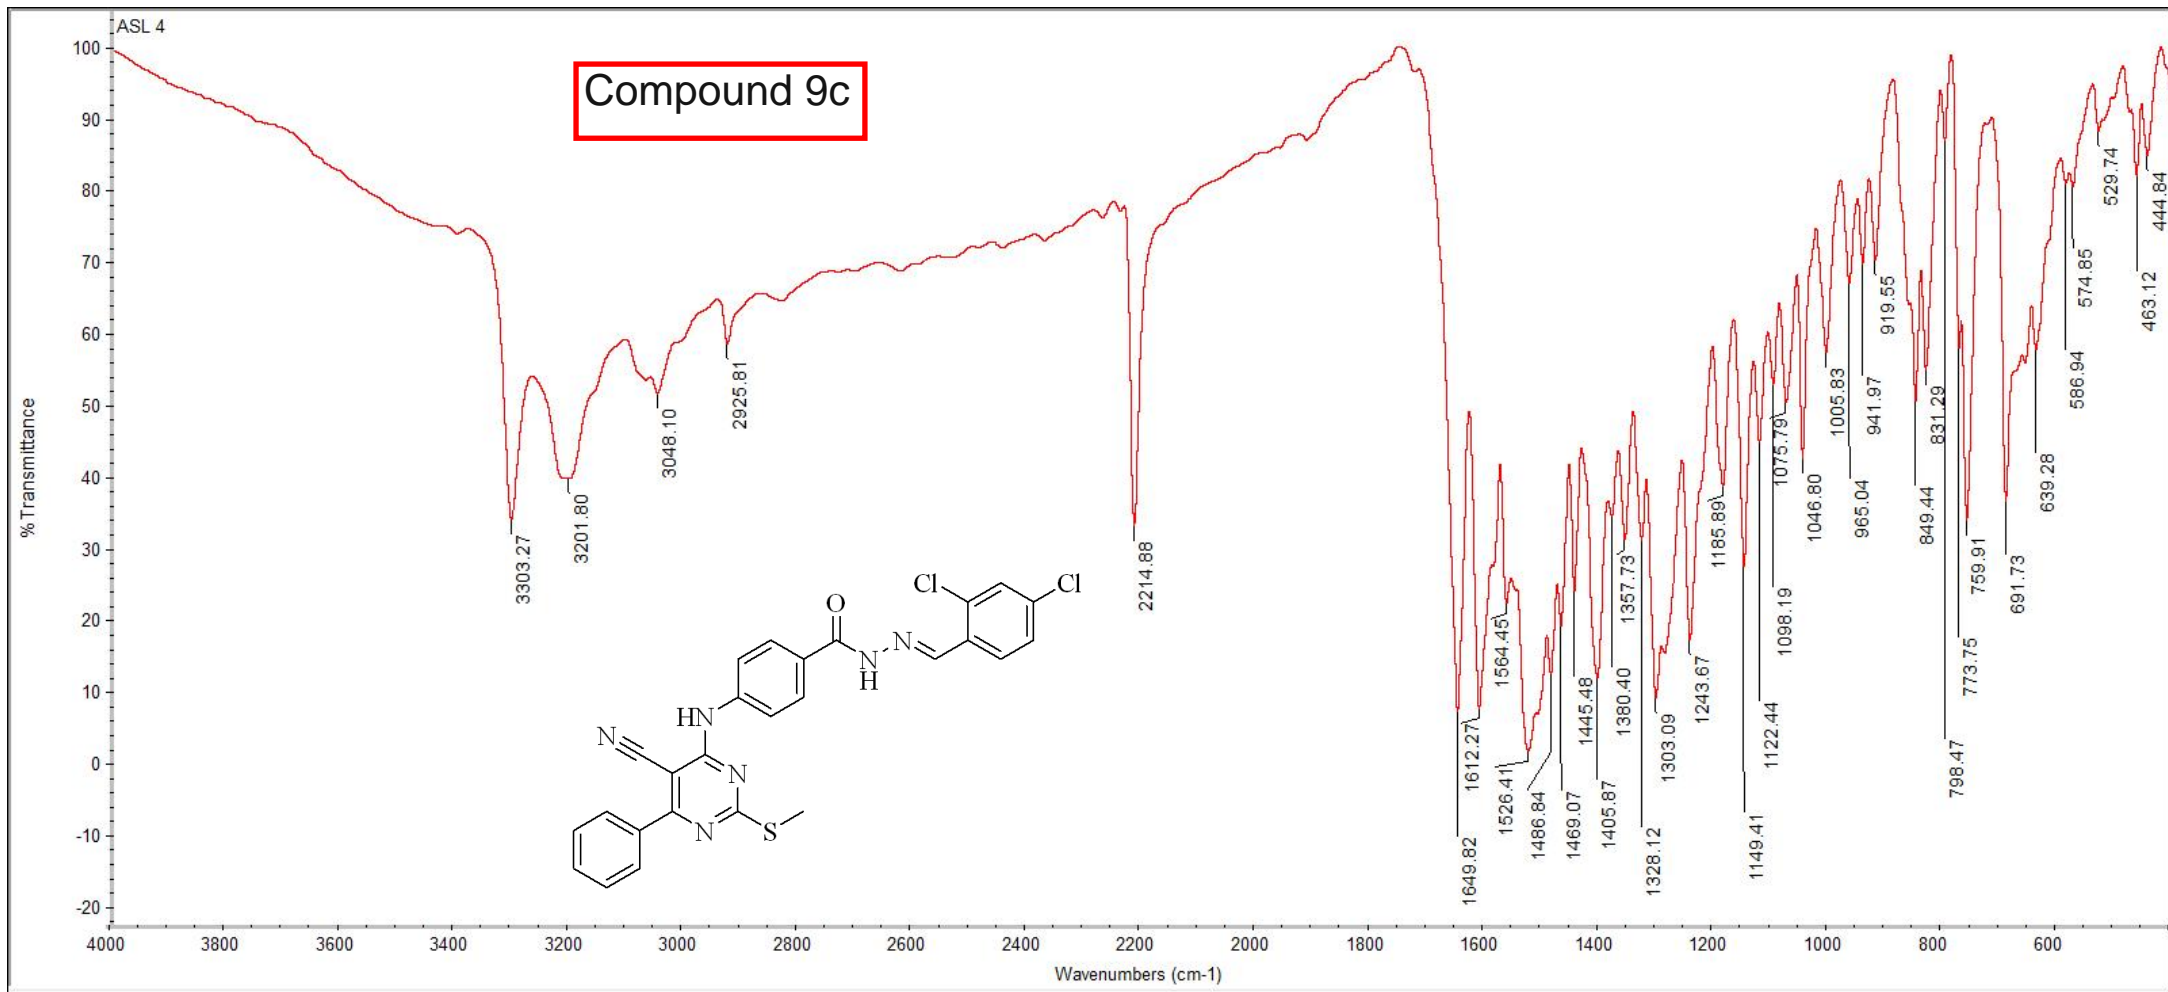



<sup>1</sup>H NMR 11h

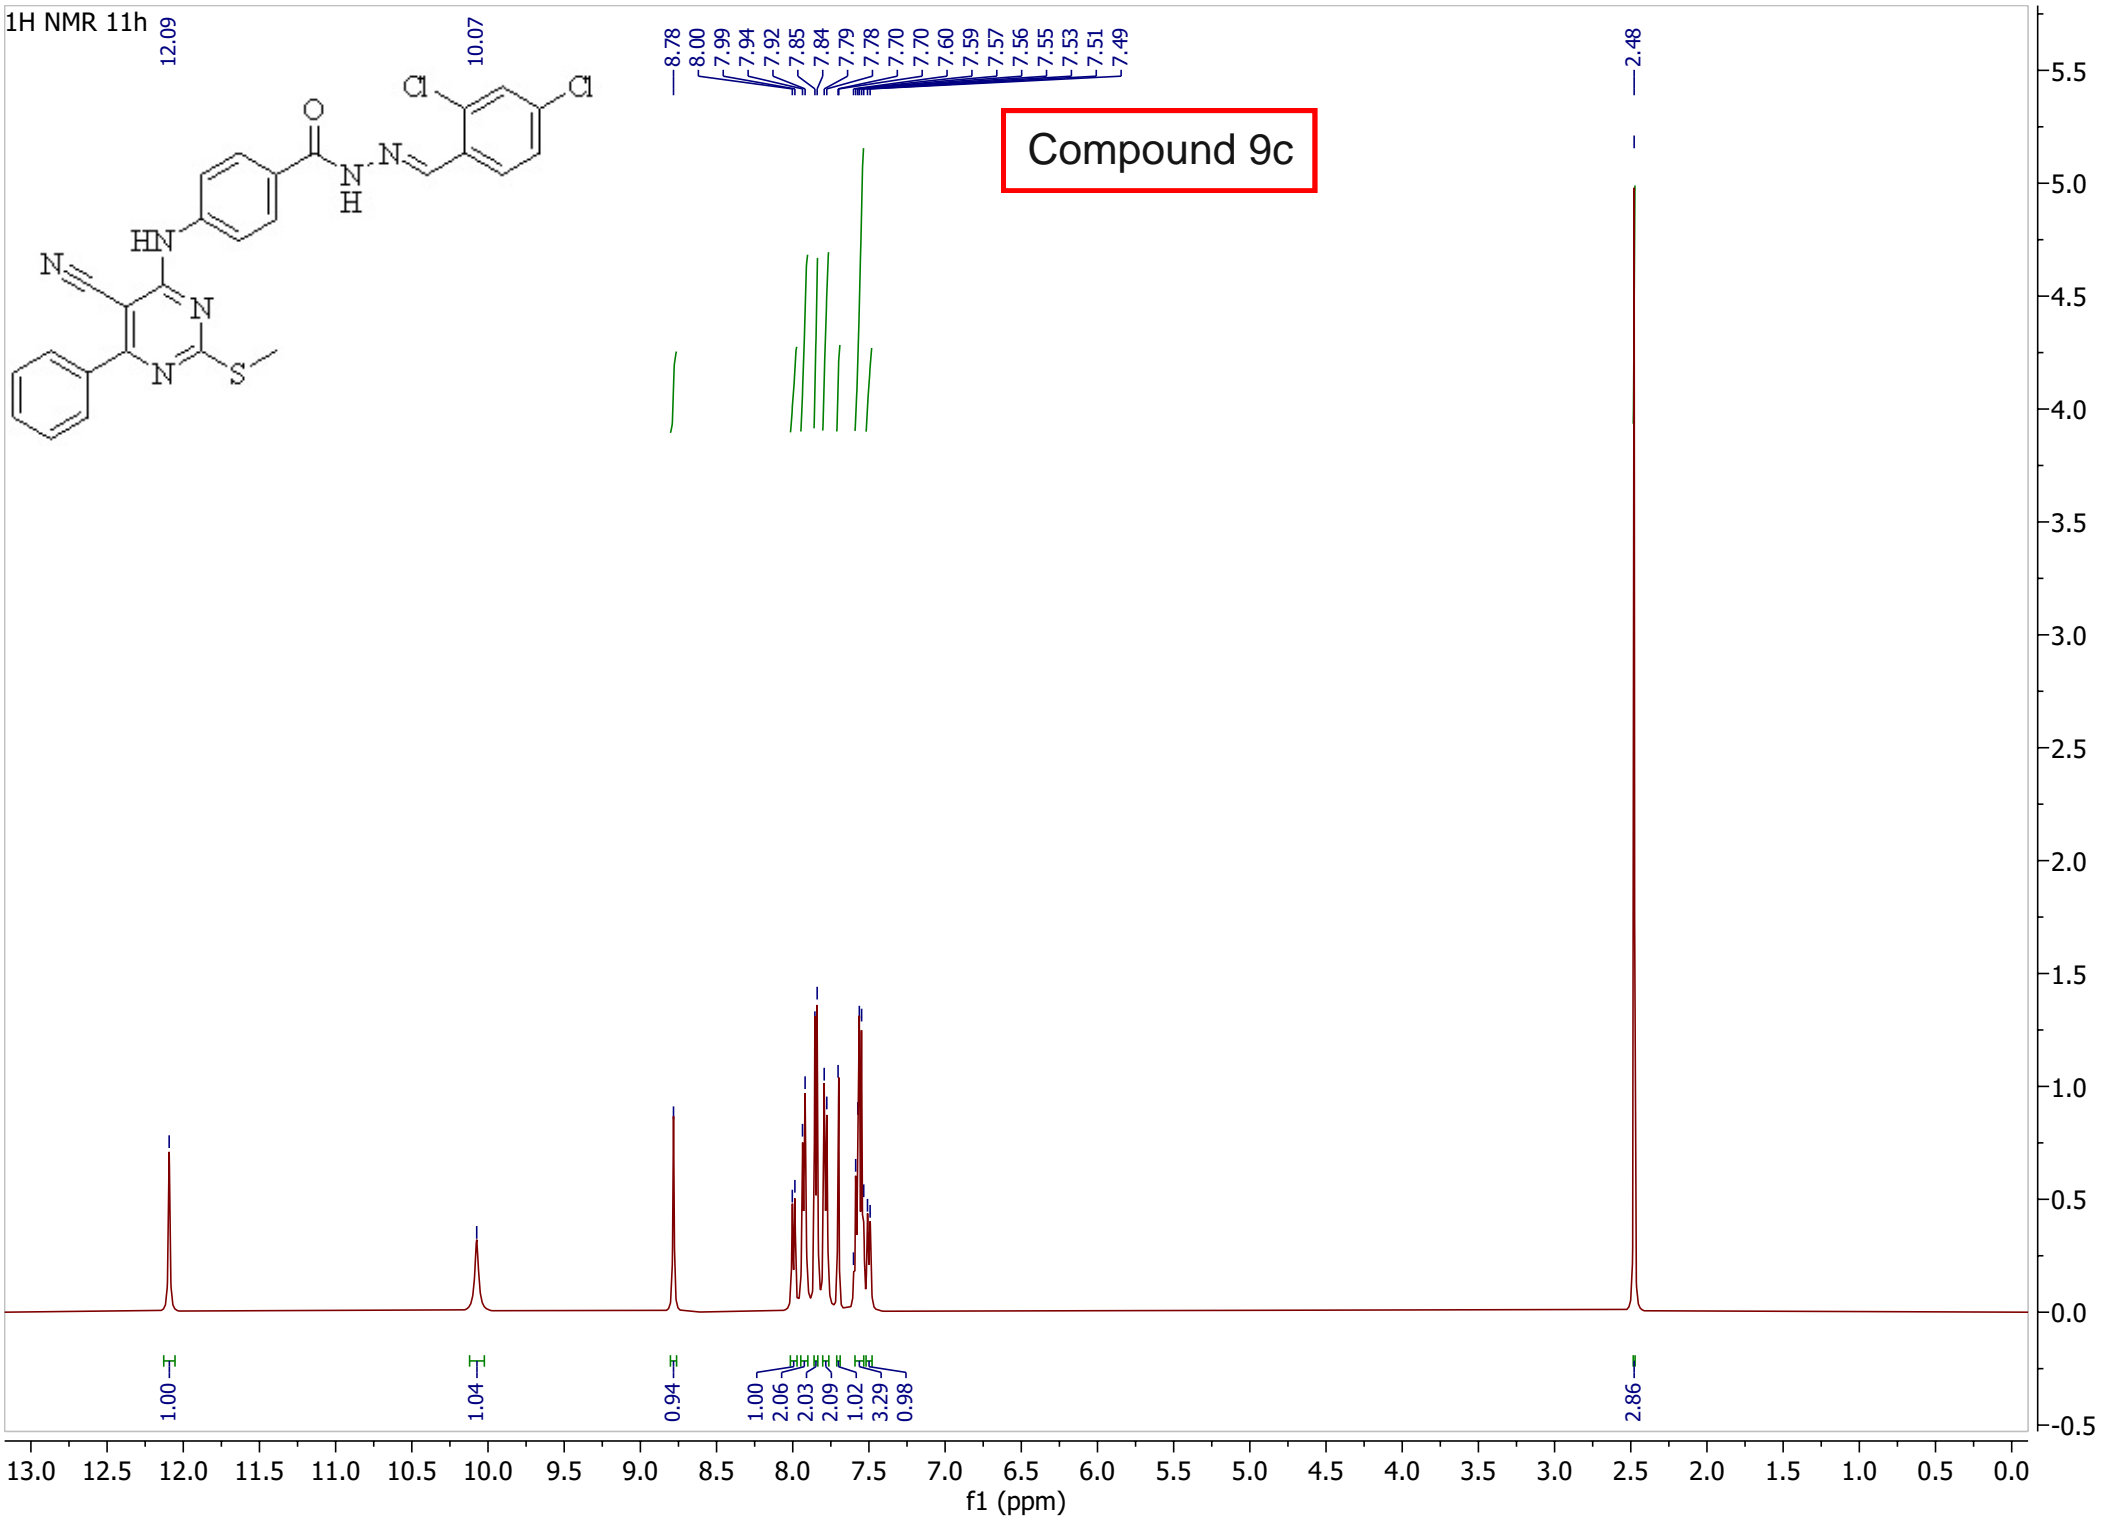

Compound 9c

<sup>1</sup>H NMR 11h

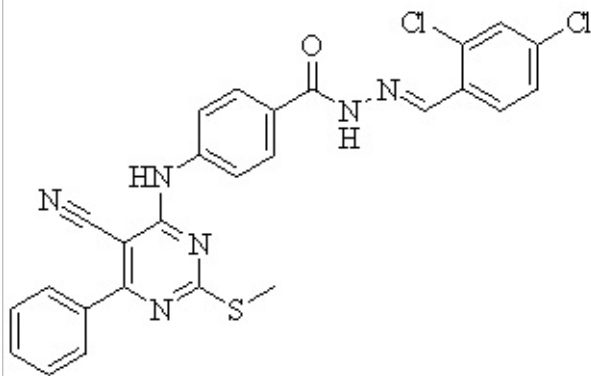

Compound 9c

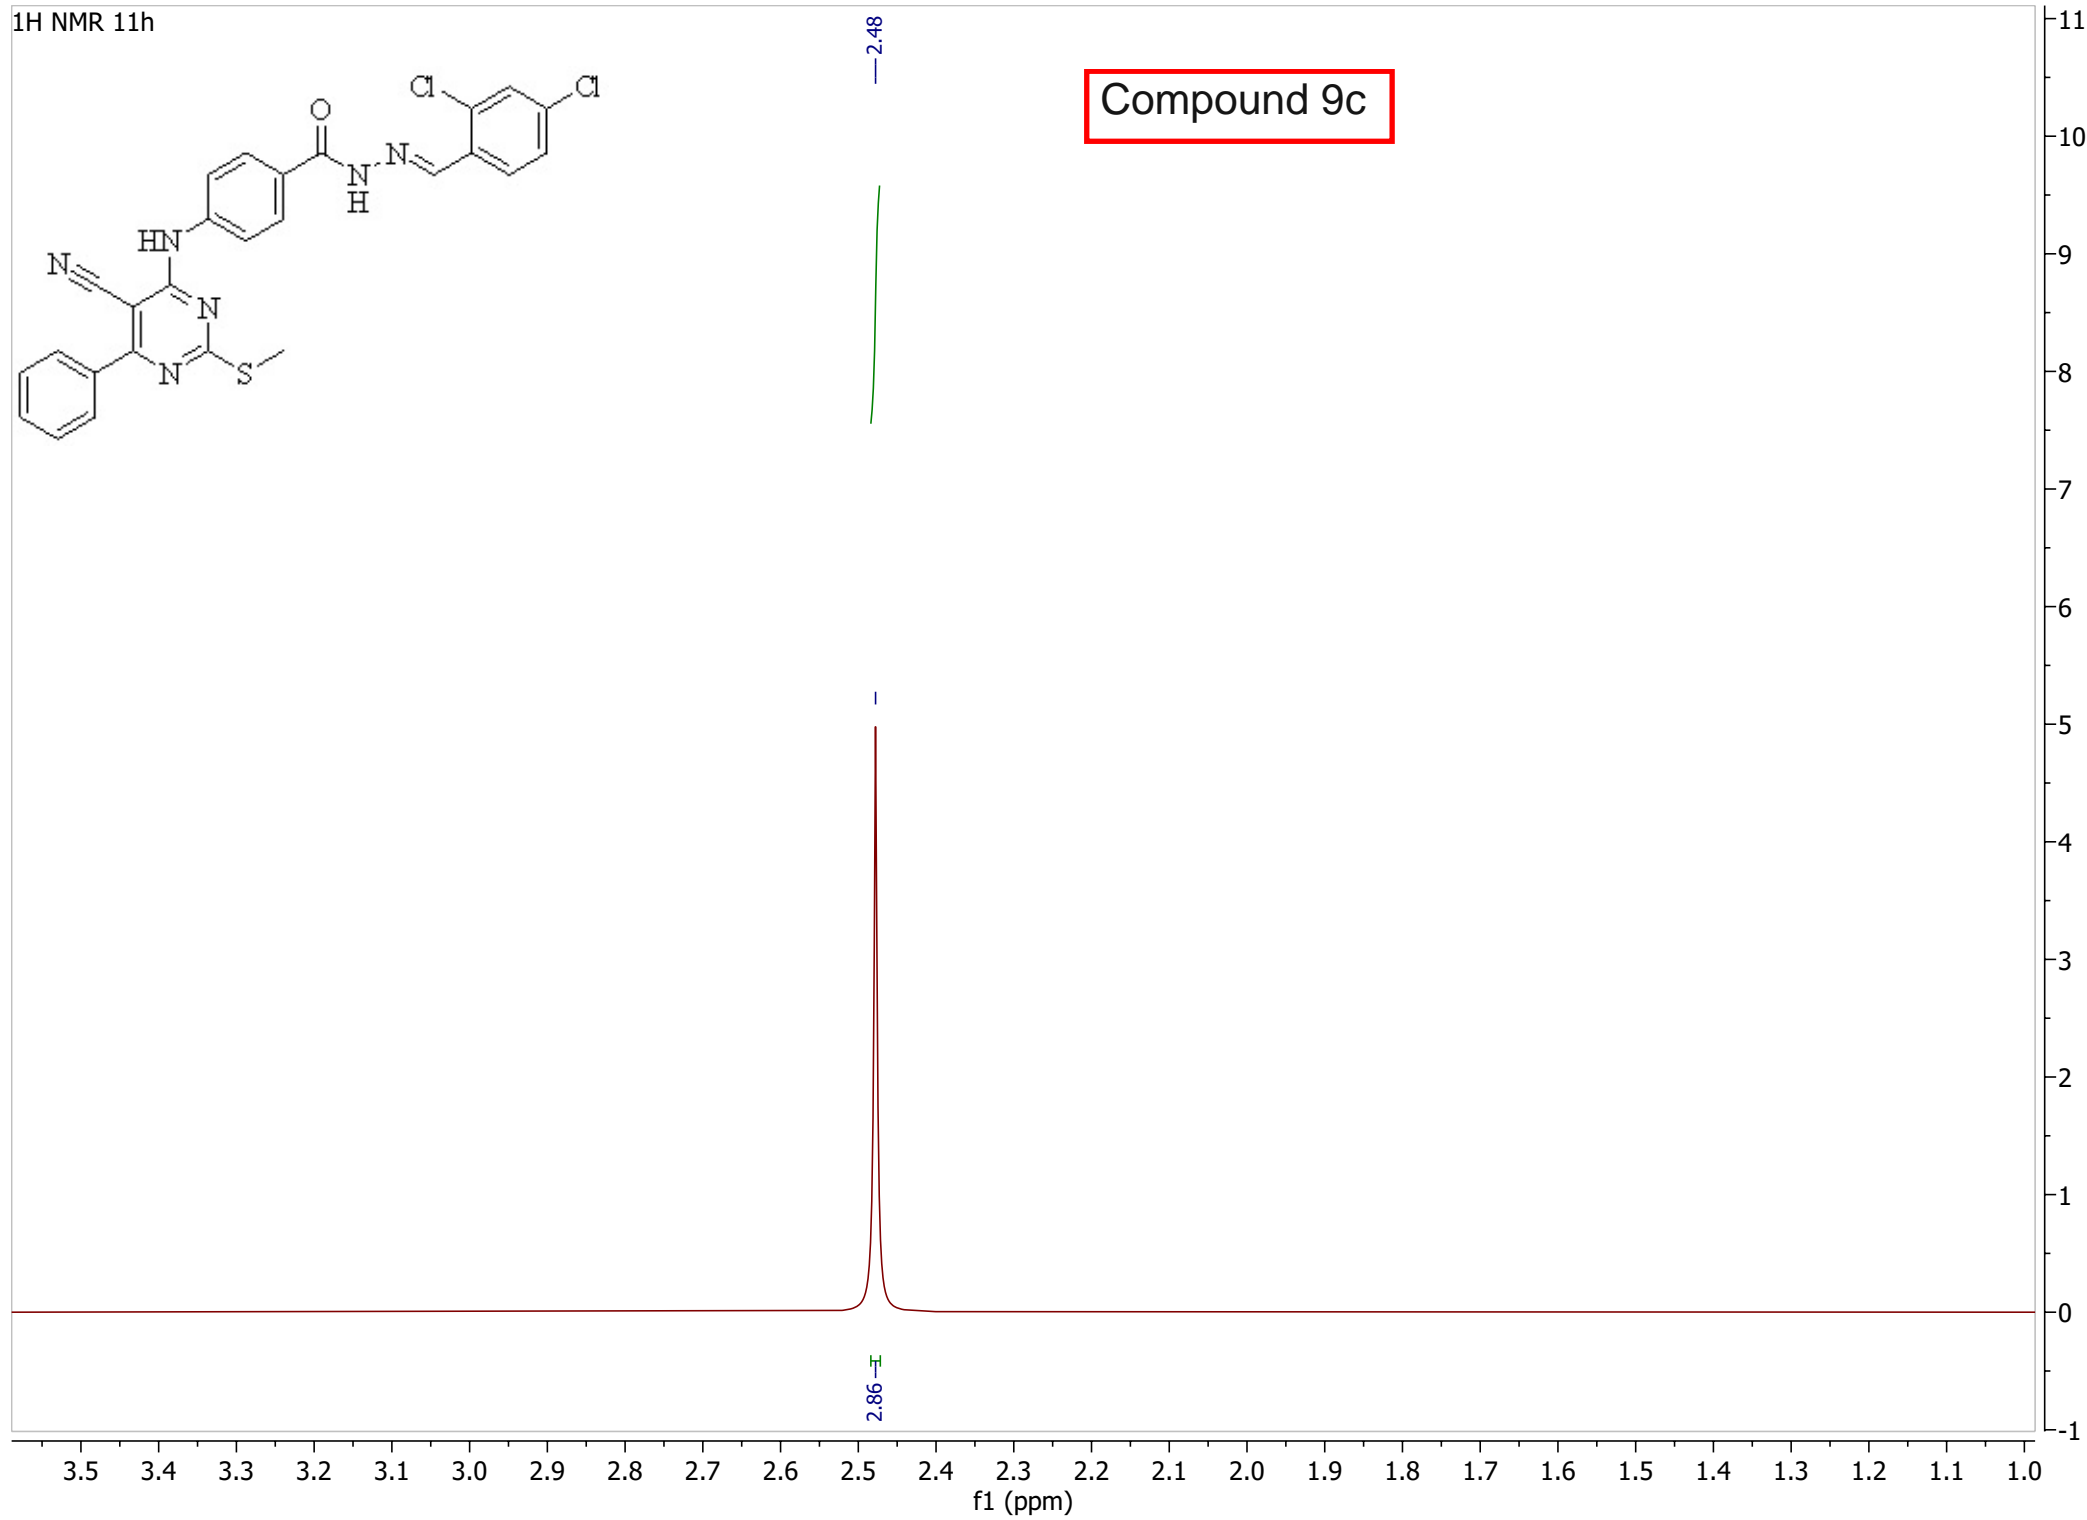

1H NMR 11h

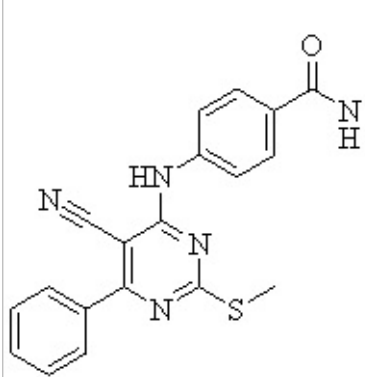

Compound 9c

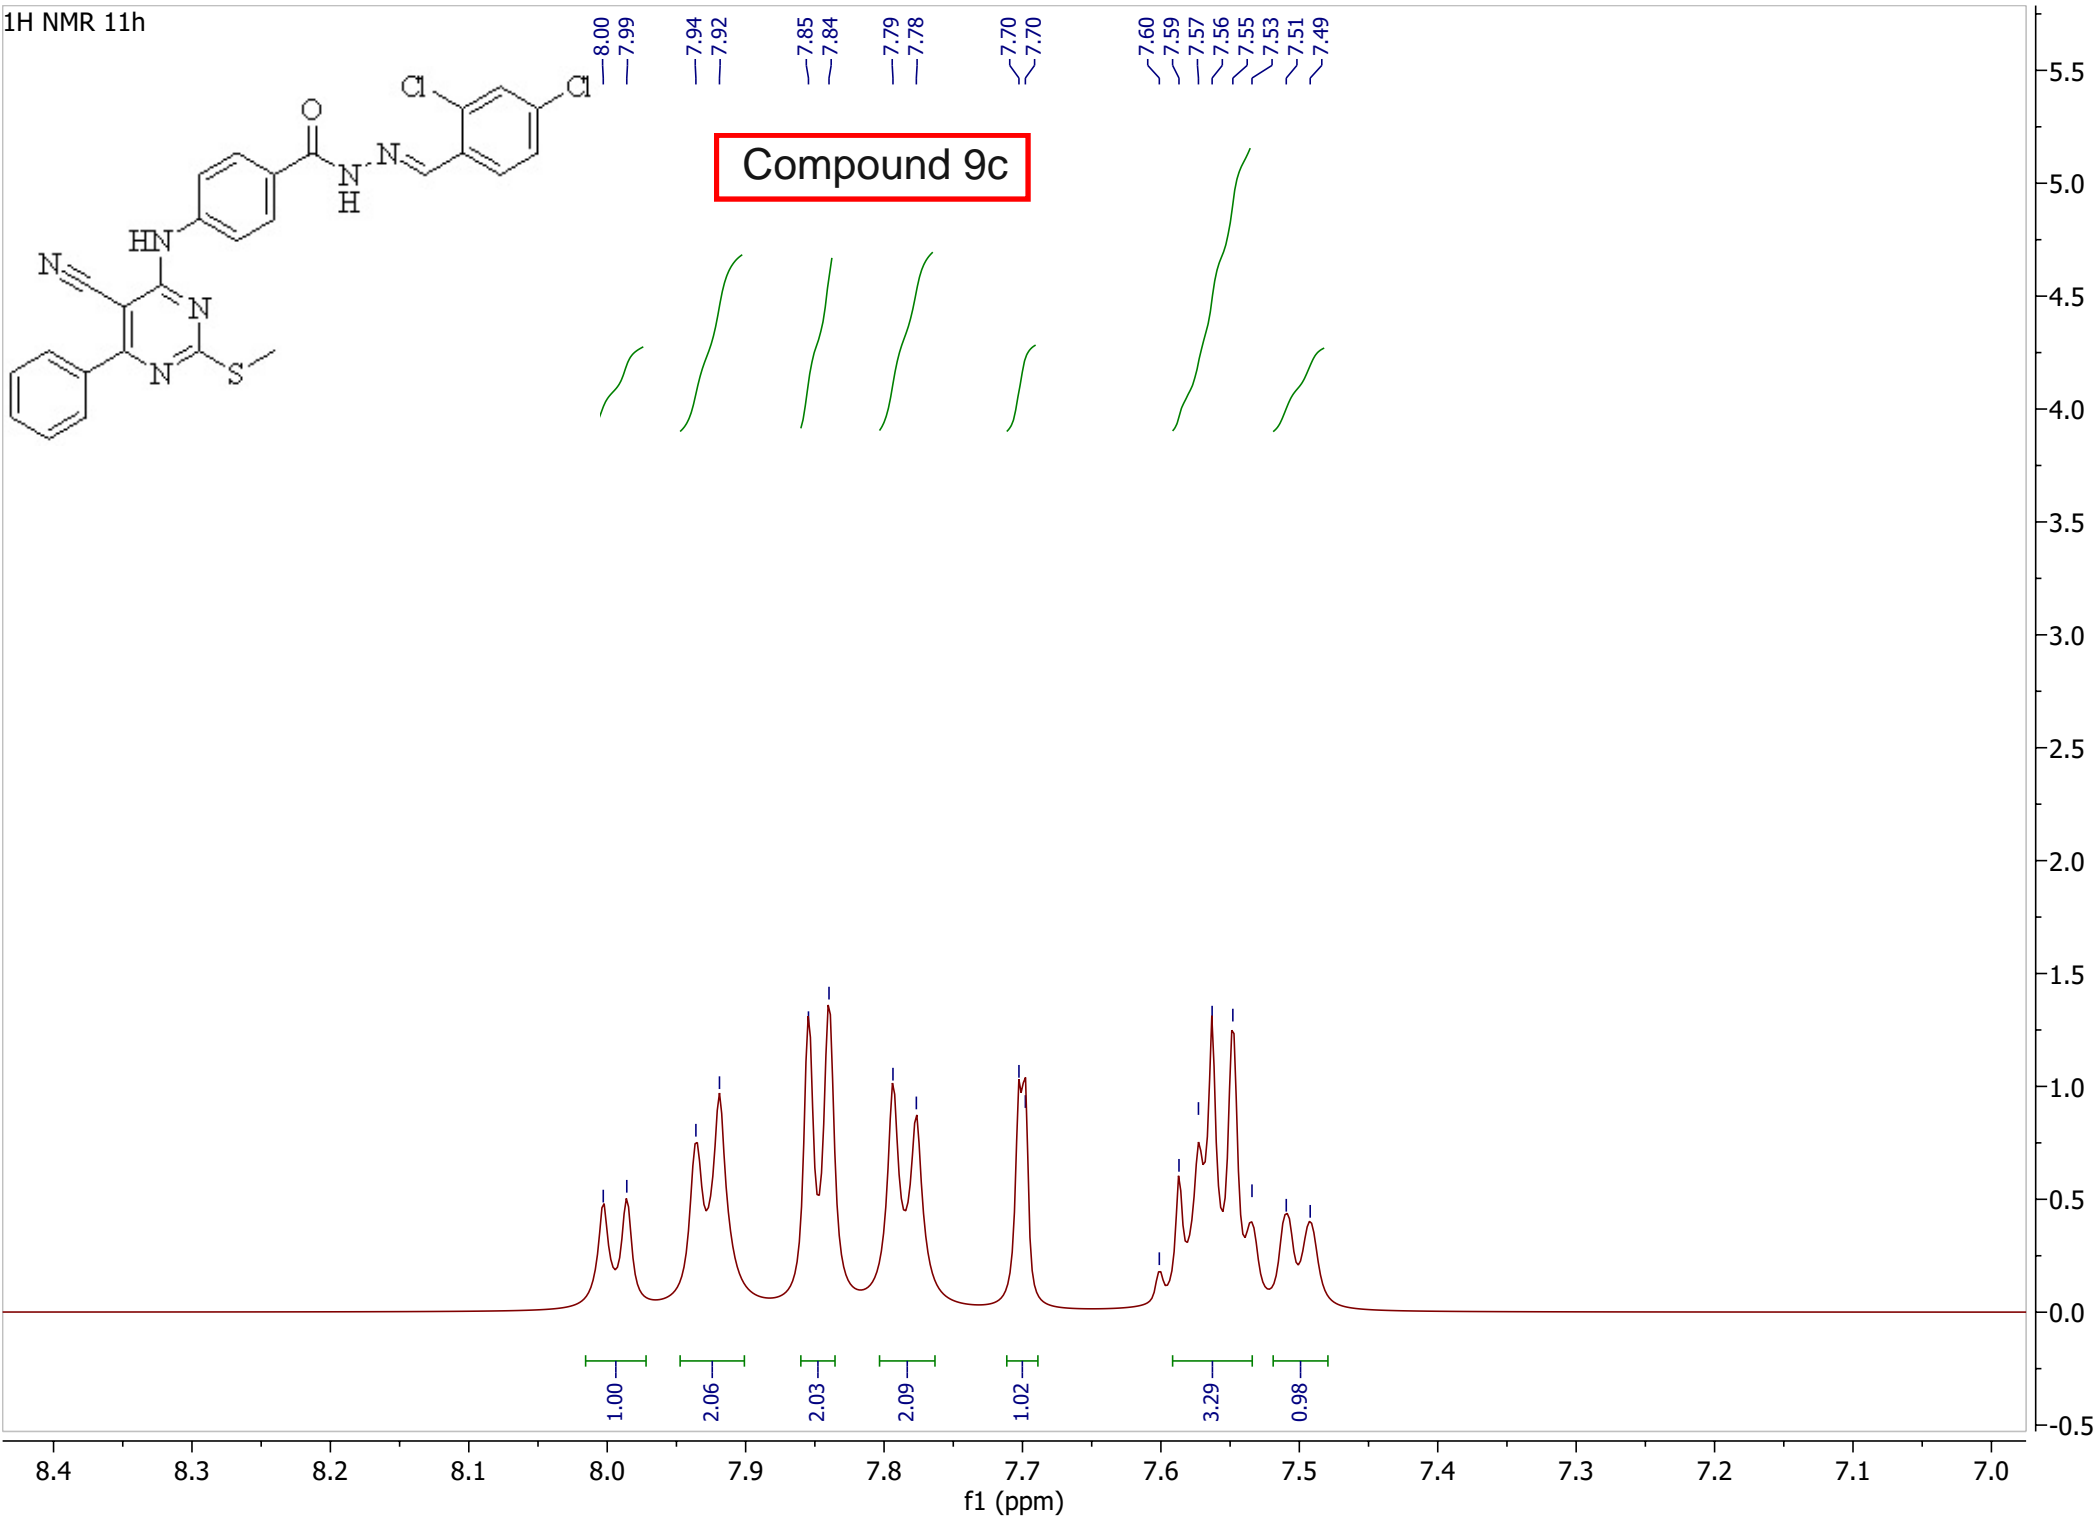

1H NMR 11h

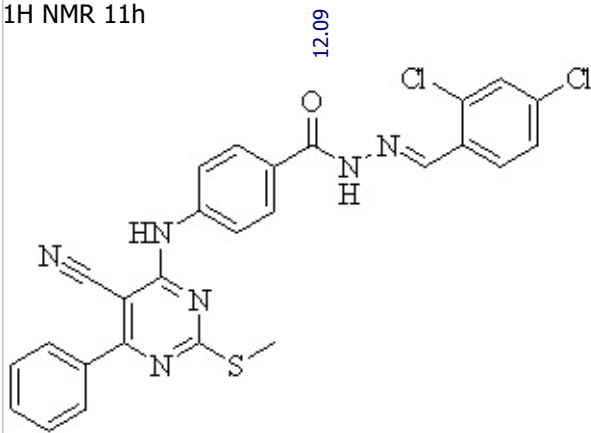

Compound 9c

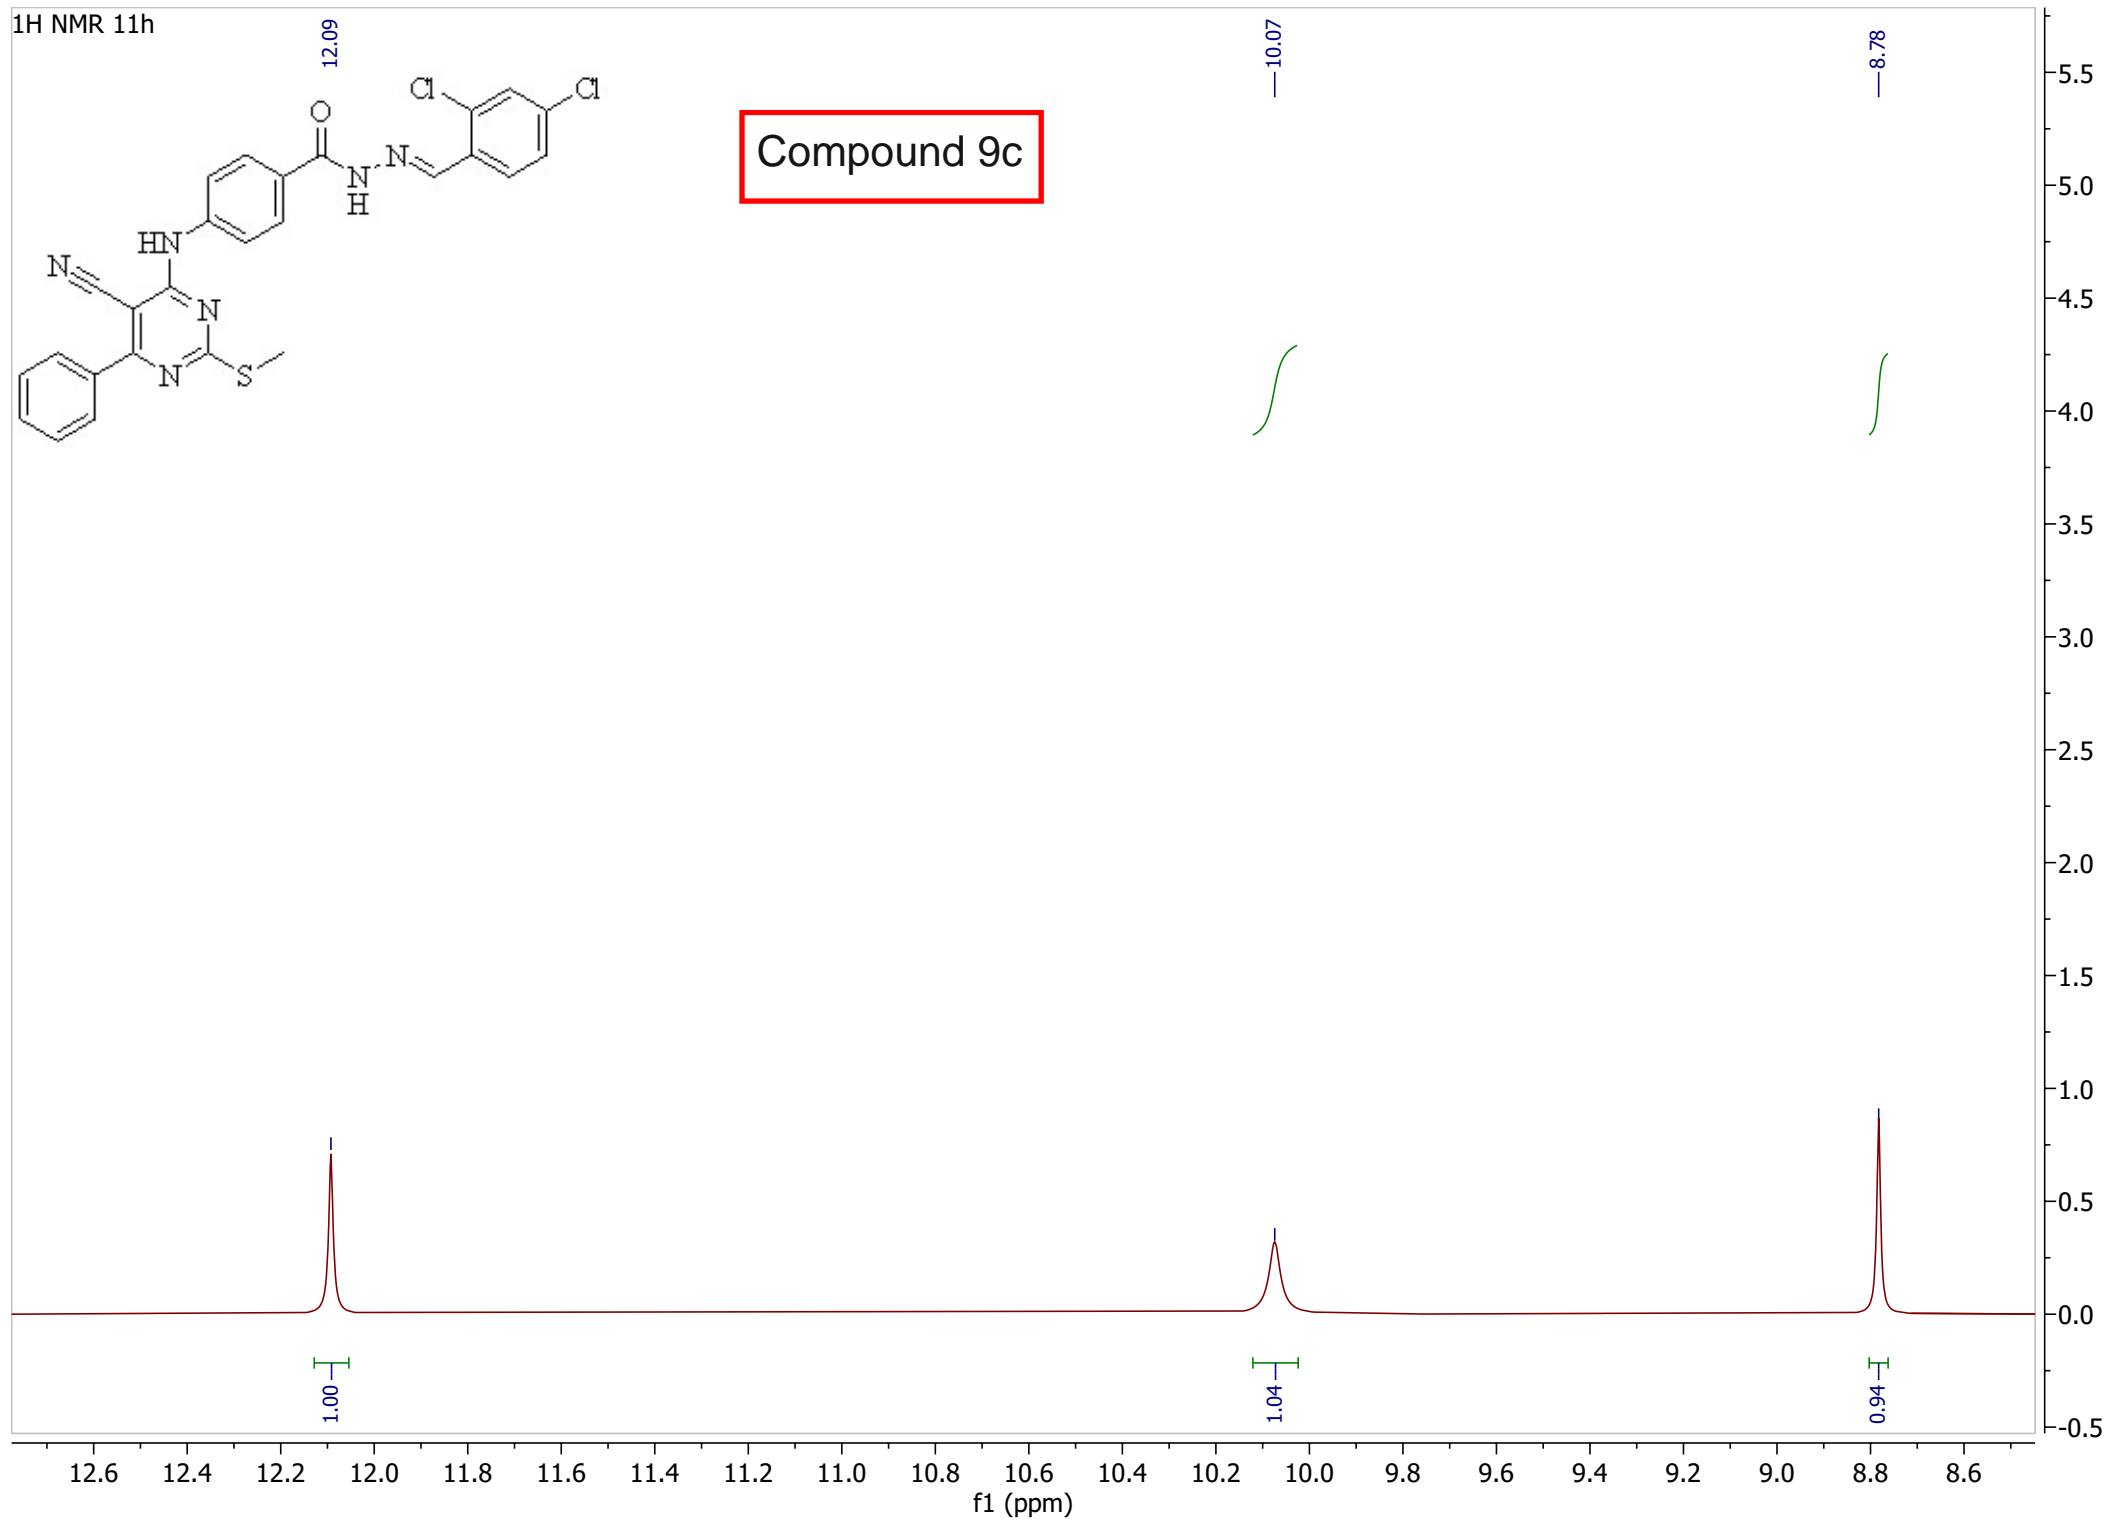

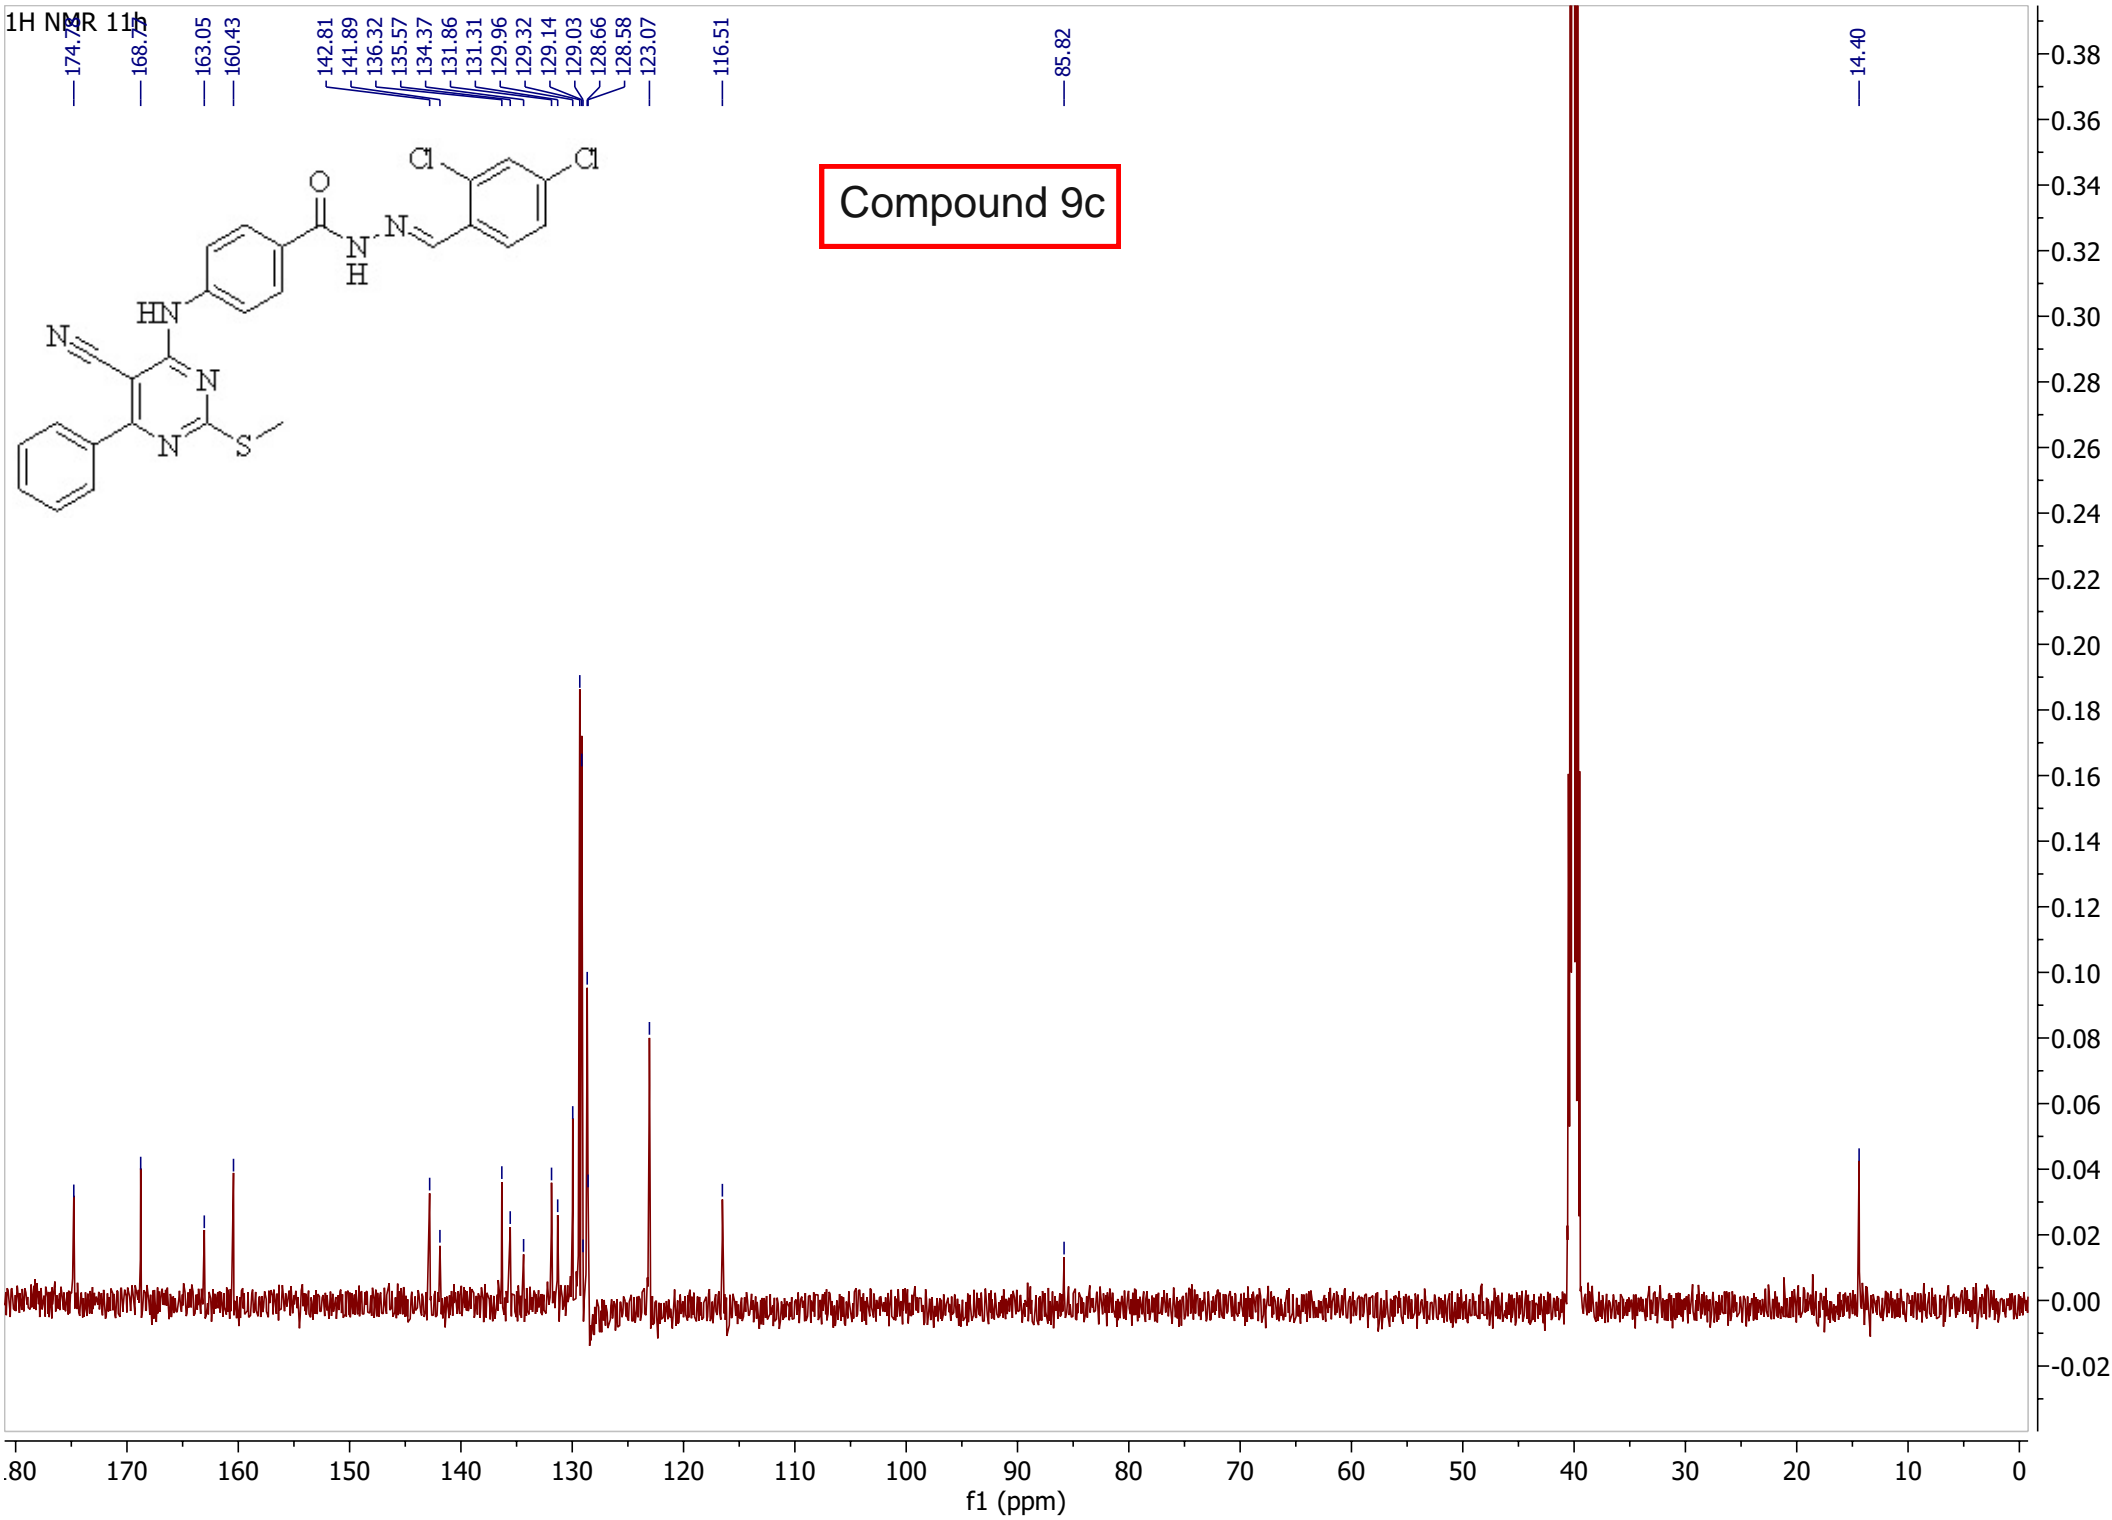

<sup>1</sup>H NMR 11h

— 85.82

— 14.40

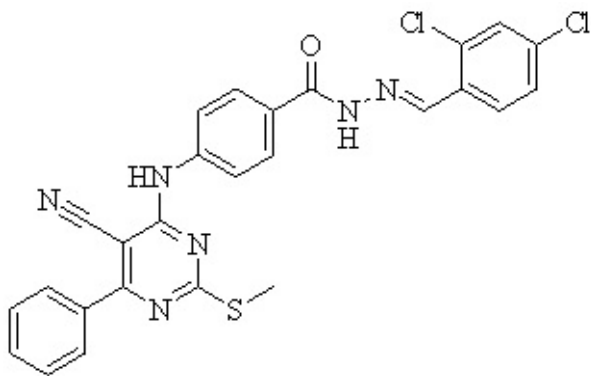

Compound 9c

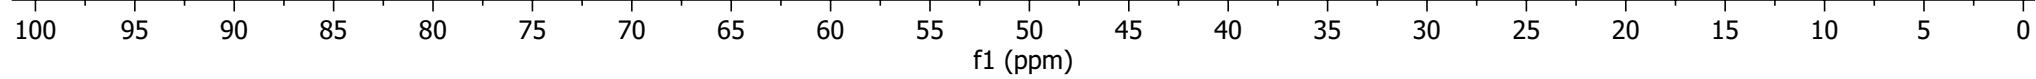

<sup>1</sup>H NMR 11h

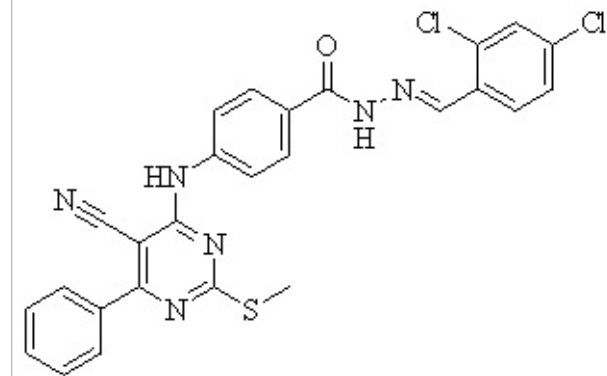

Compound 9c

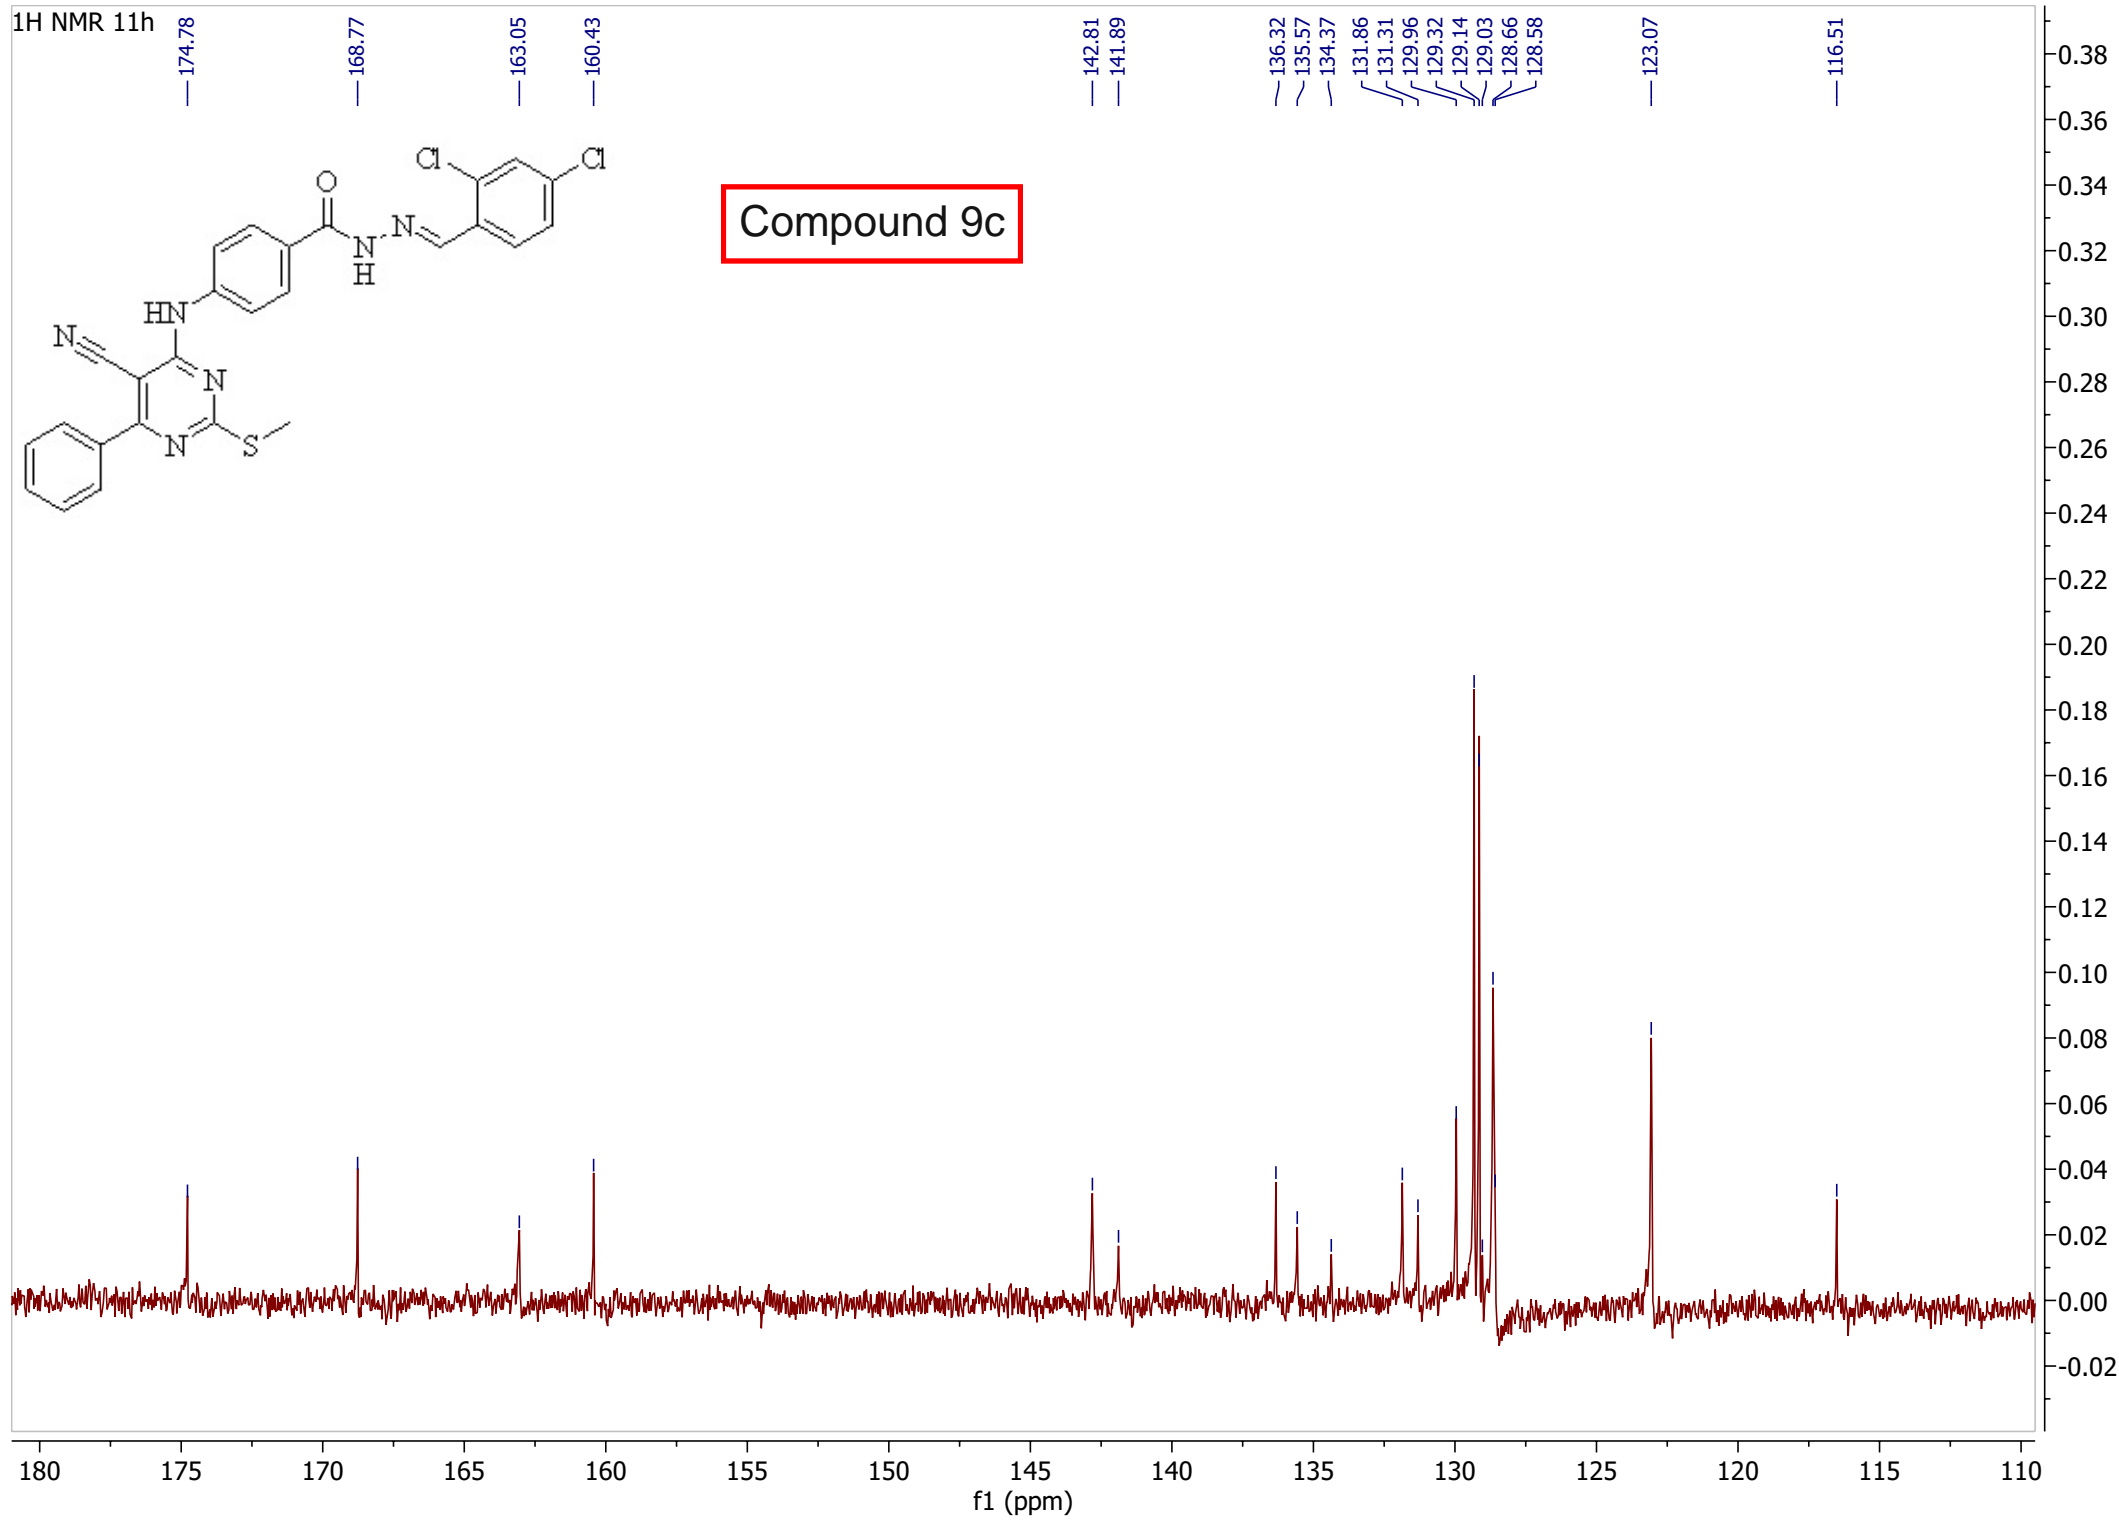

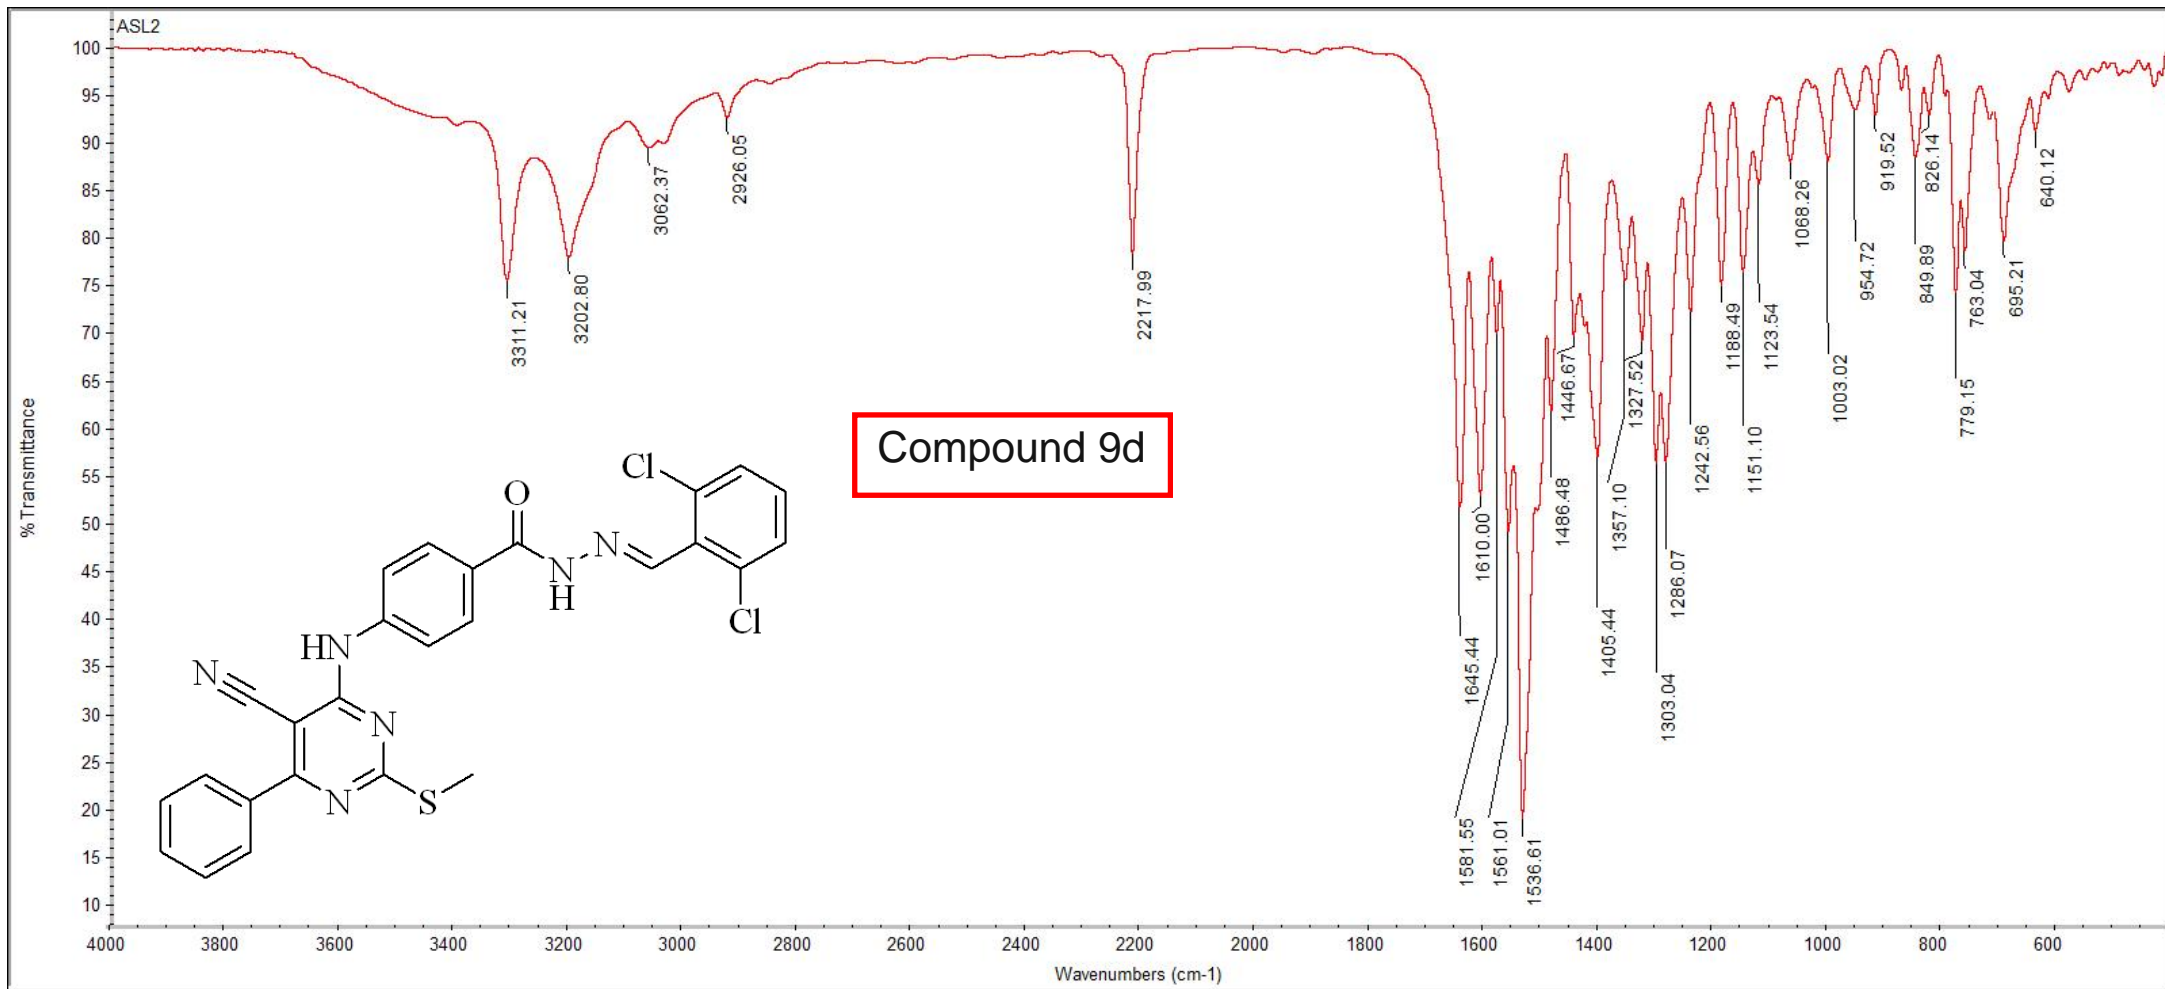



<sup>1</sup>H NMR 11h

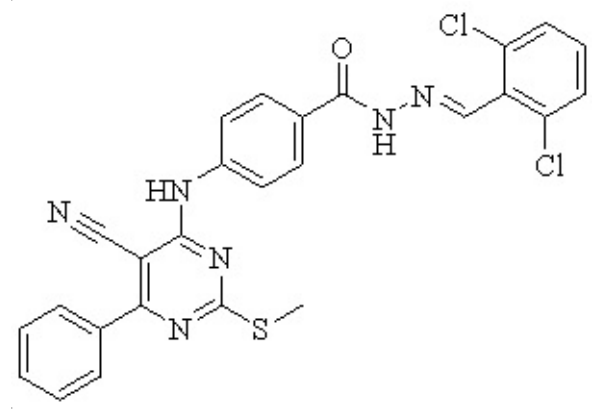

Compound 9d

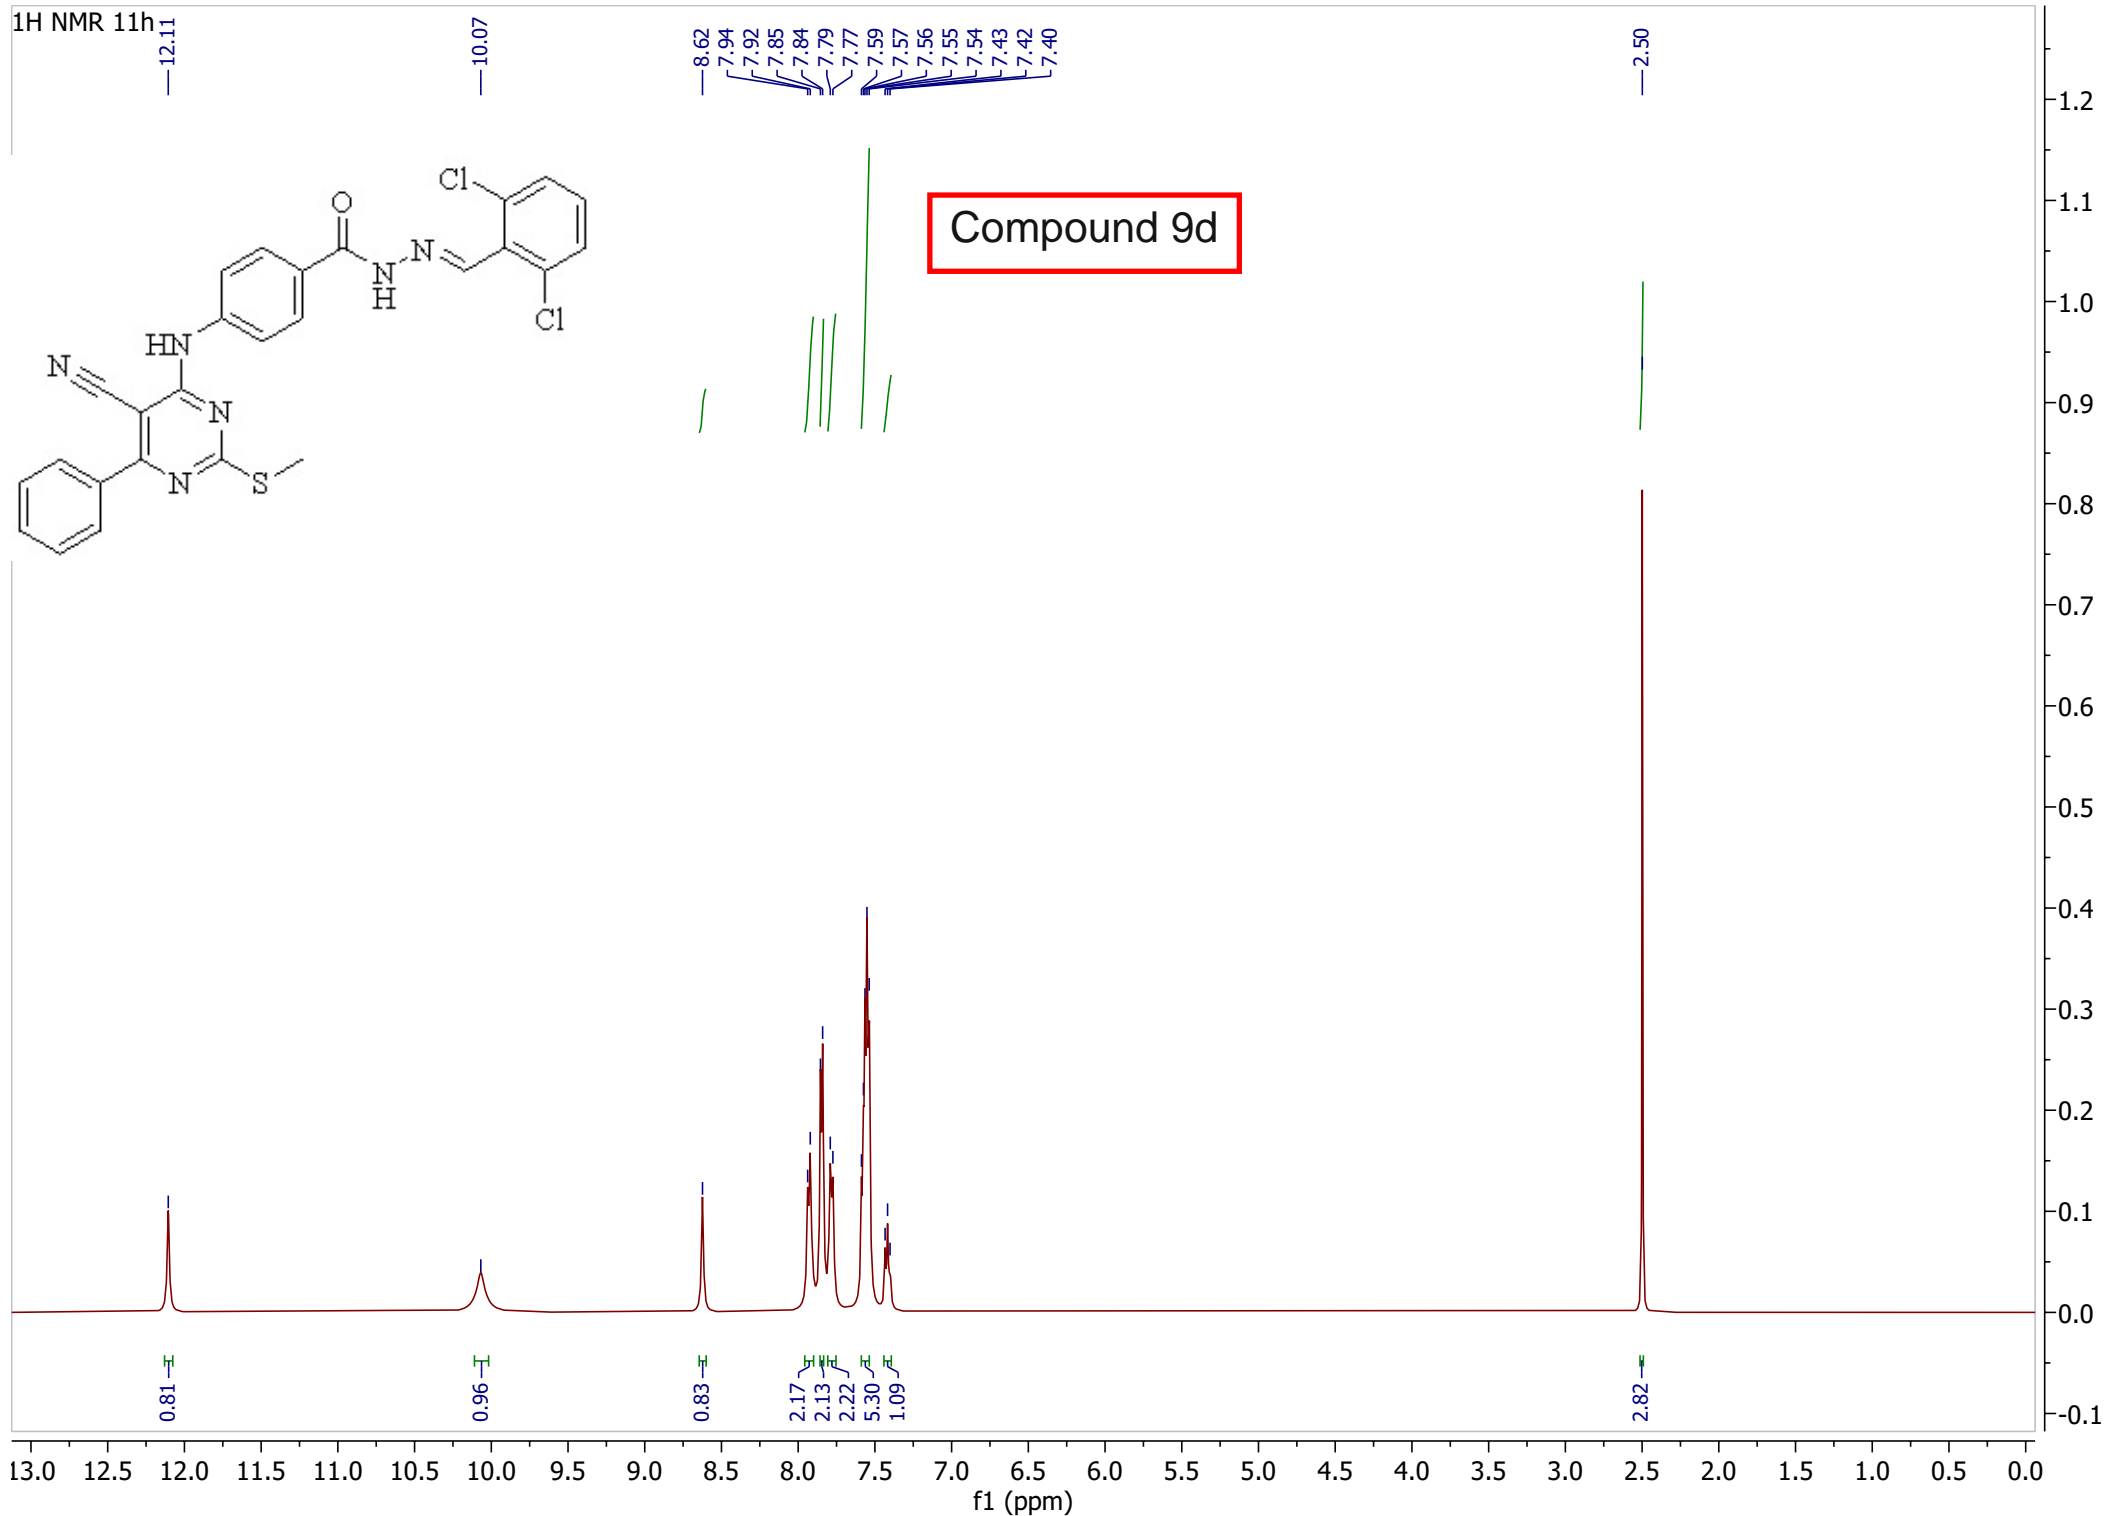

<sup>1</sup>H NMR 11h

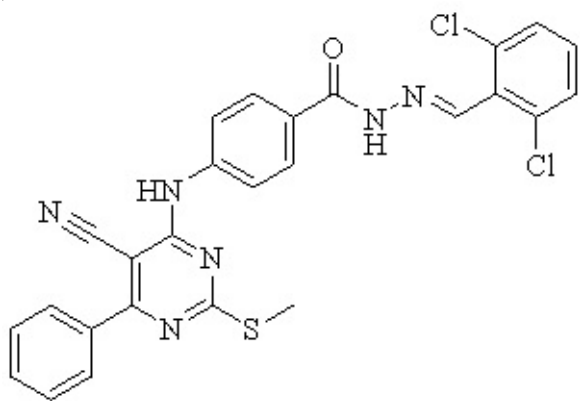

Compound 9d

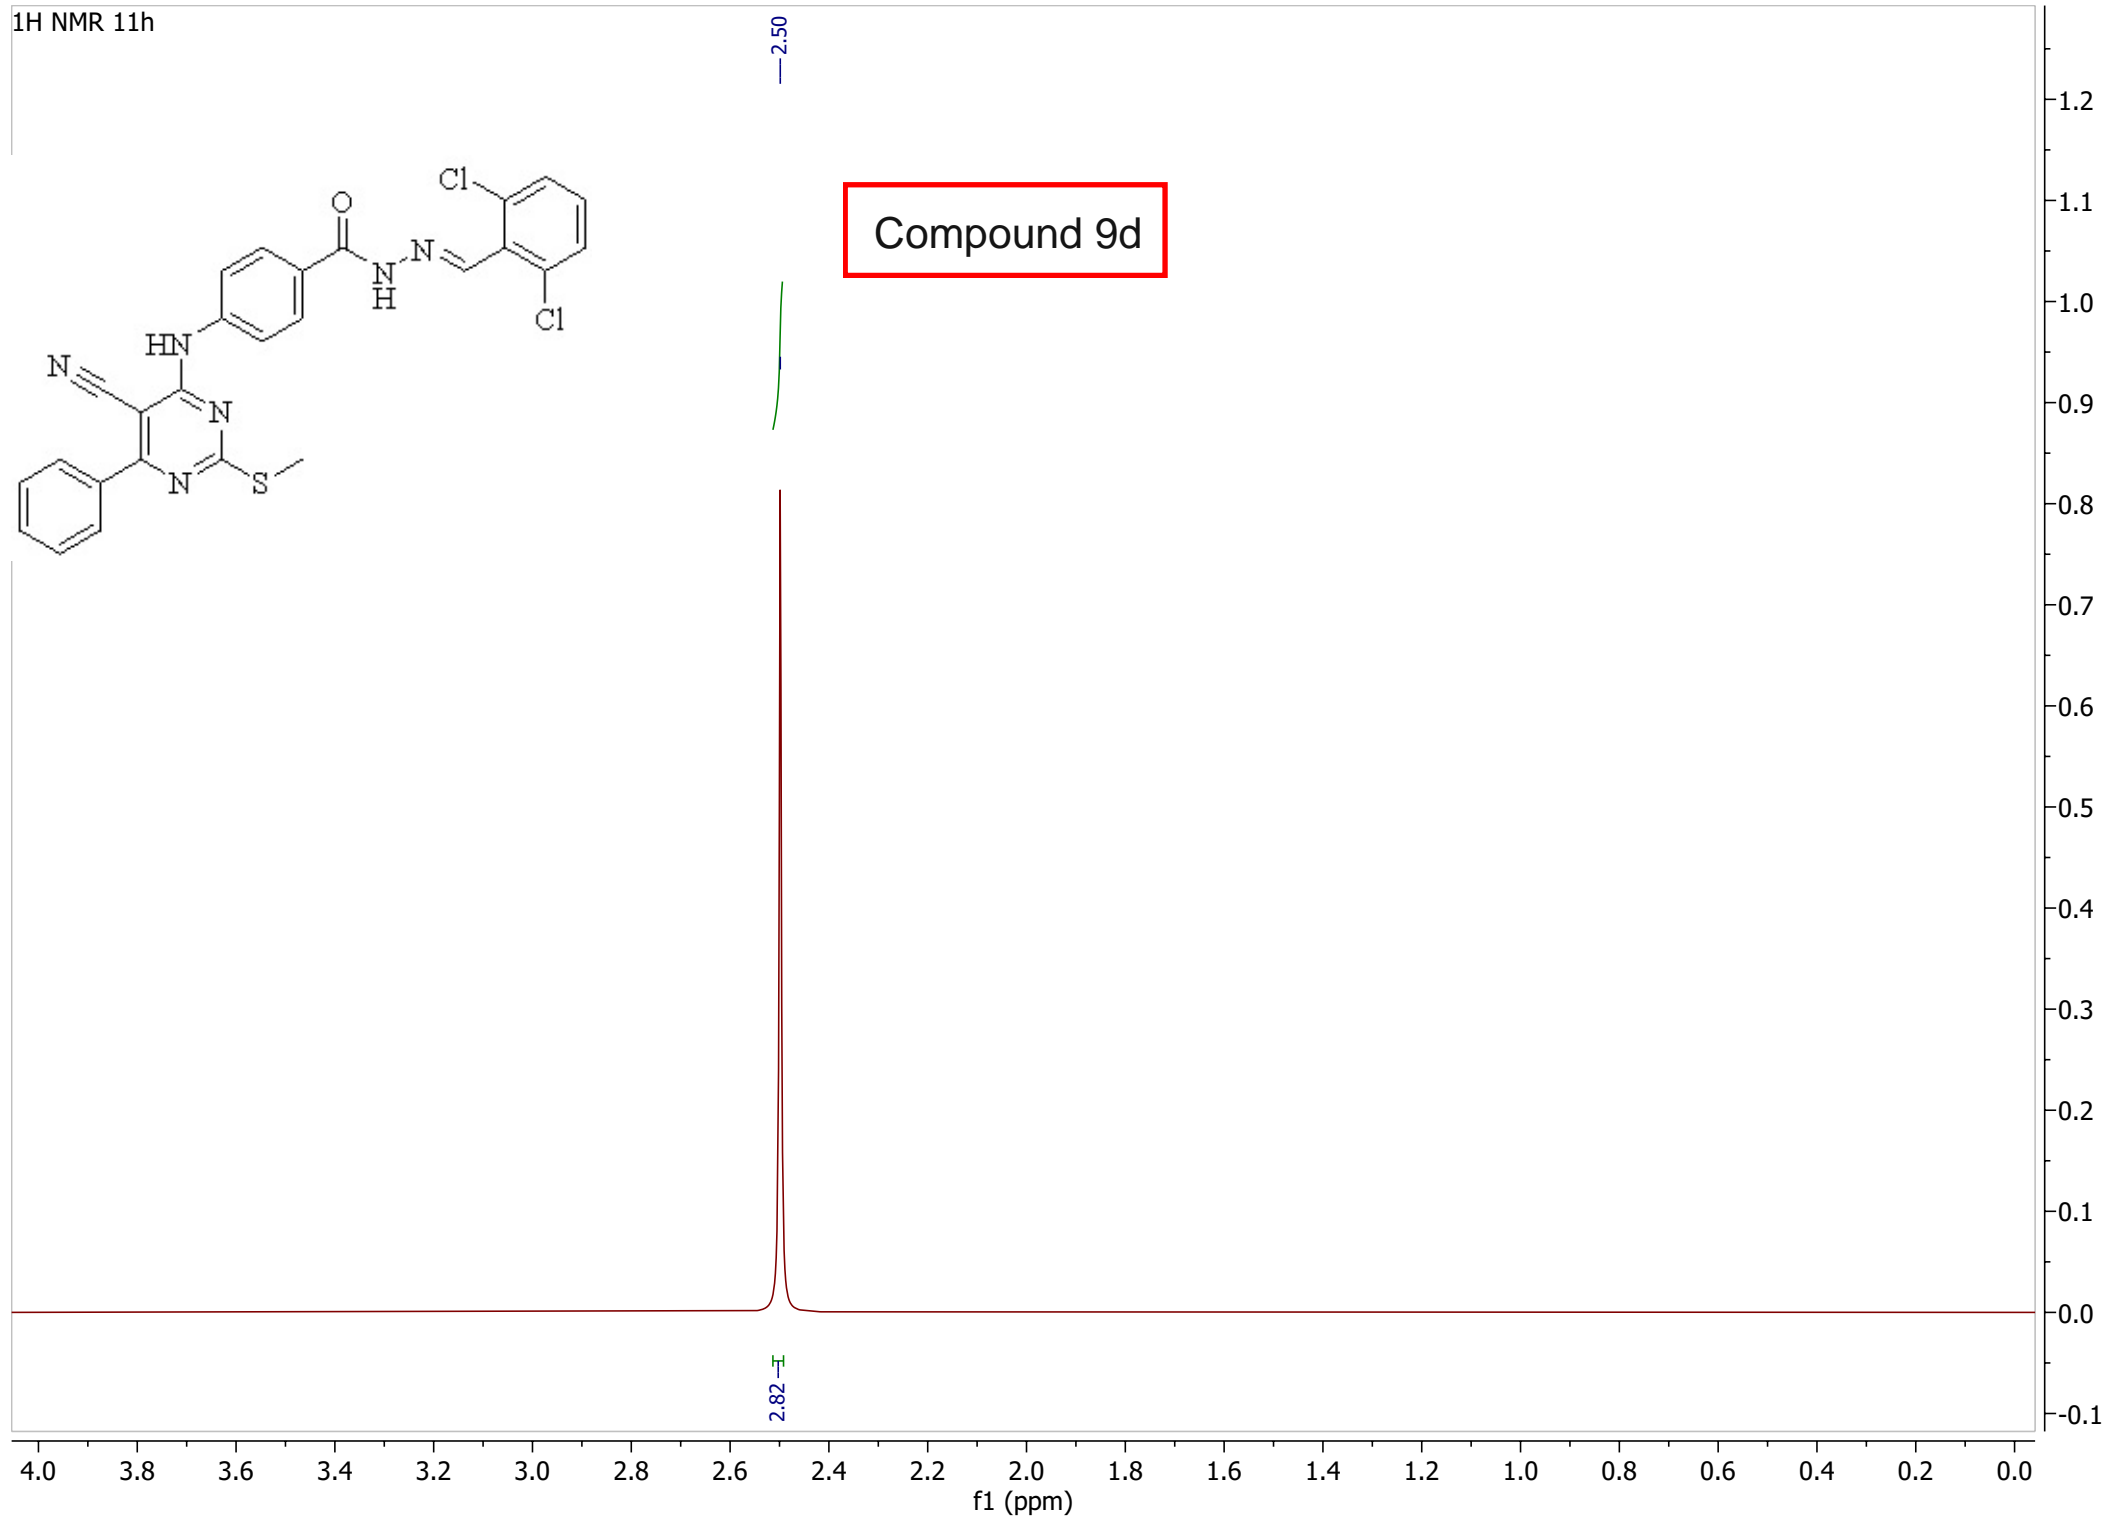

<sup>1</sup>H NMR 11h

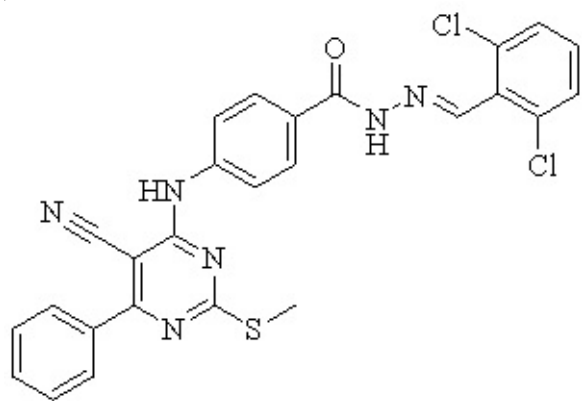

Compound 9d

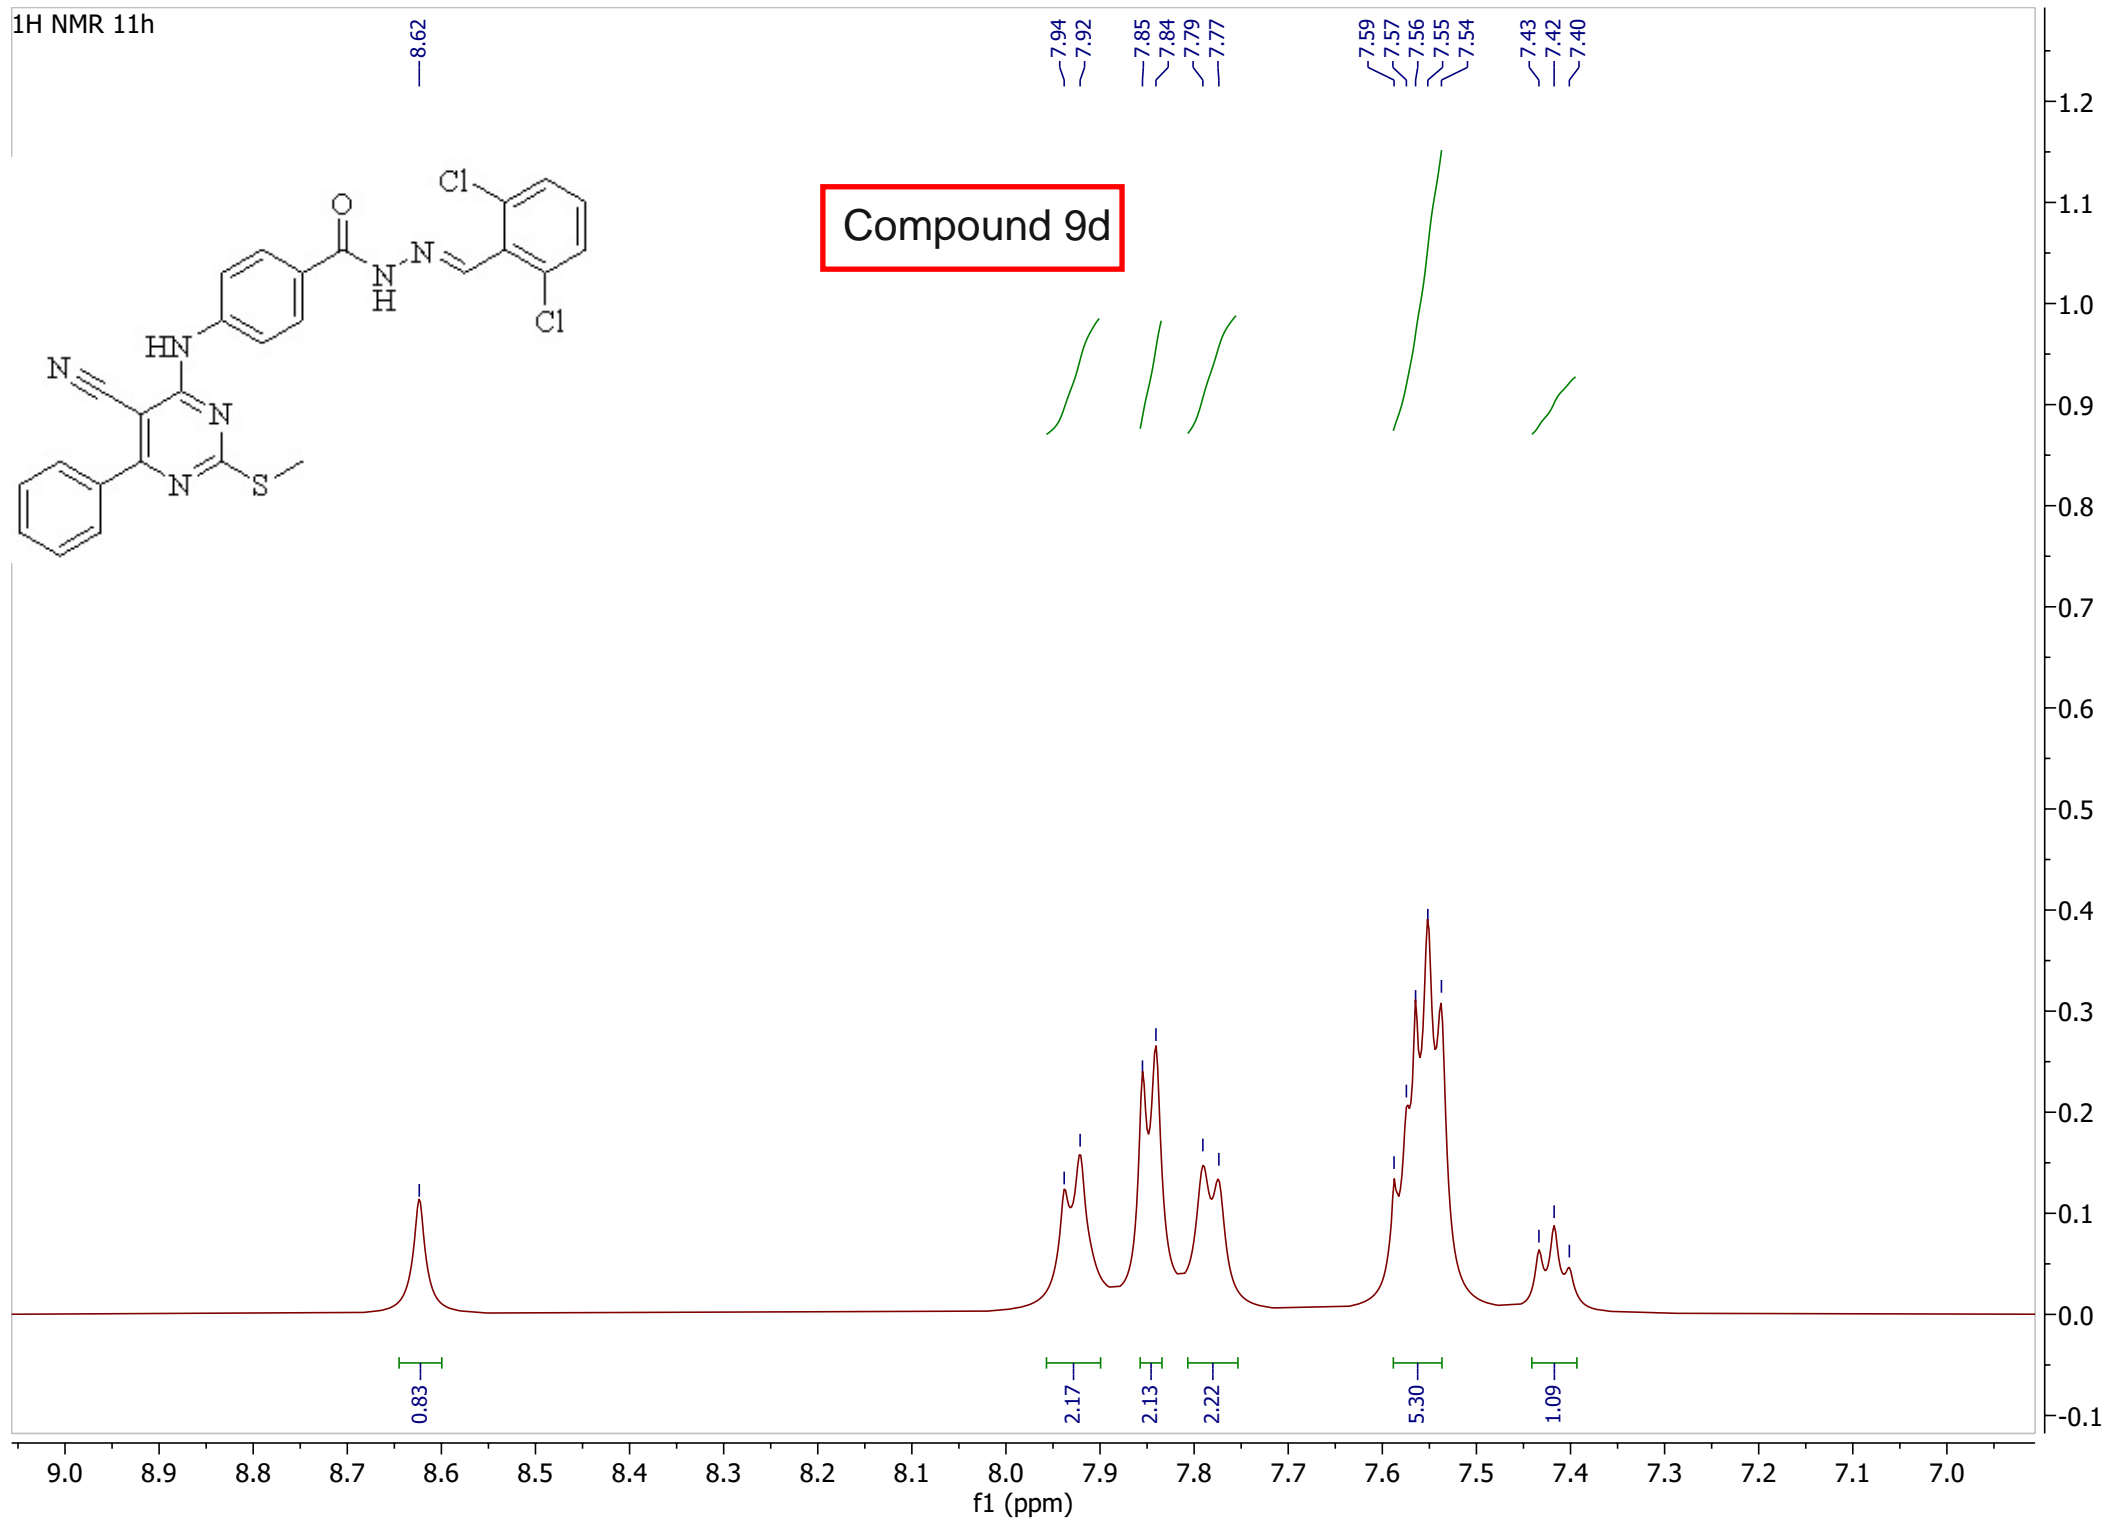

<sup>1</sup>H NMR 11h



Compound 9d

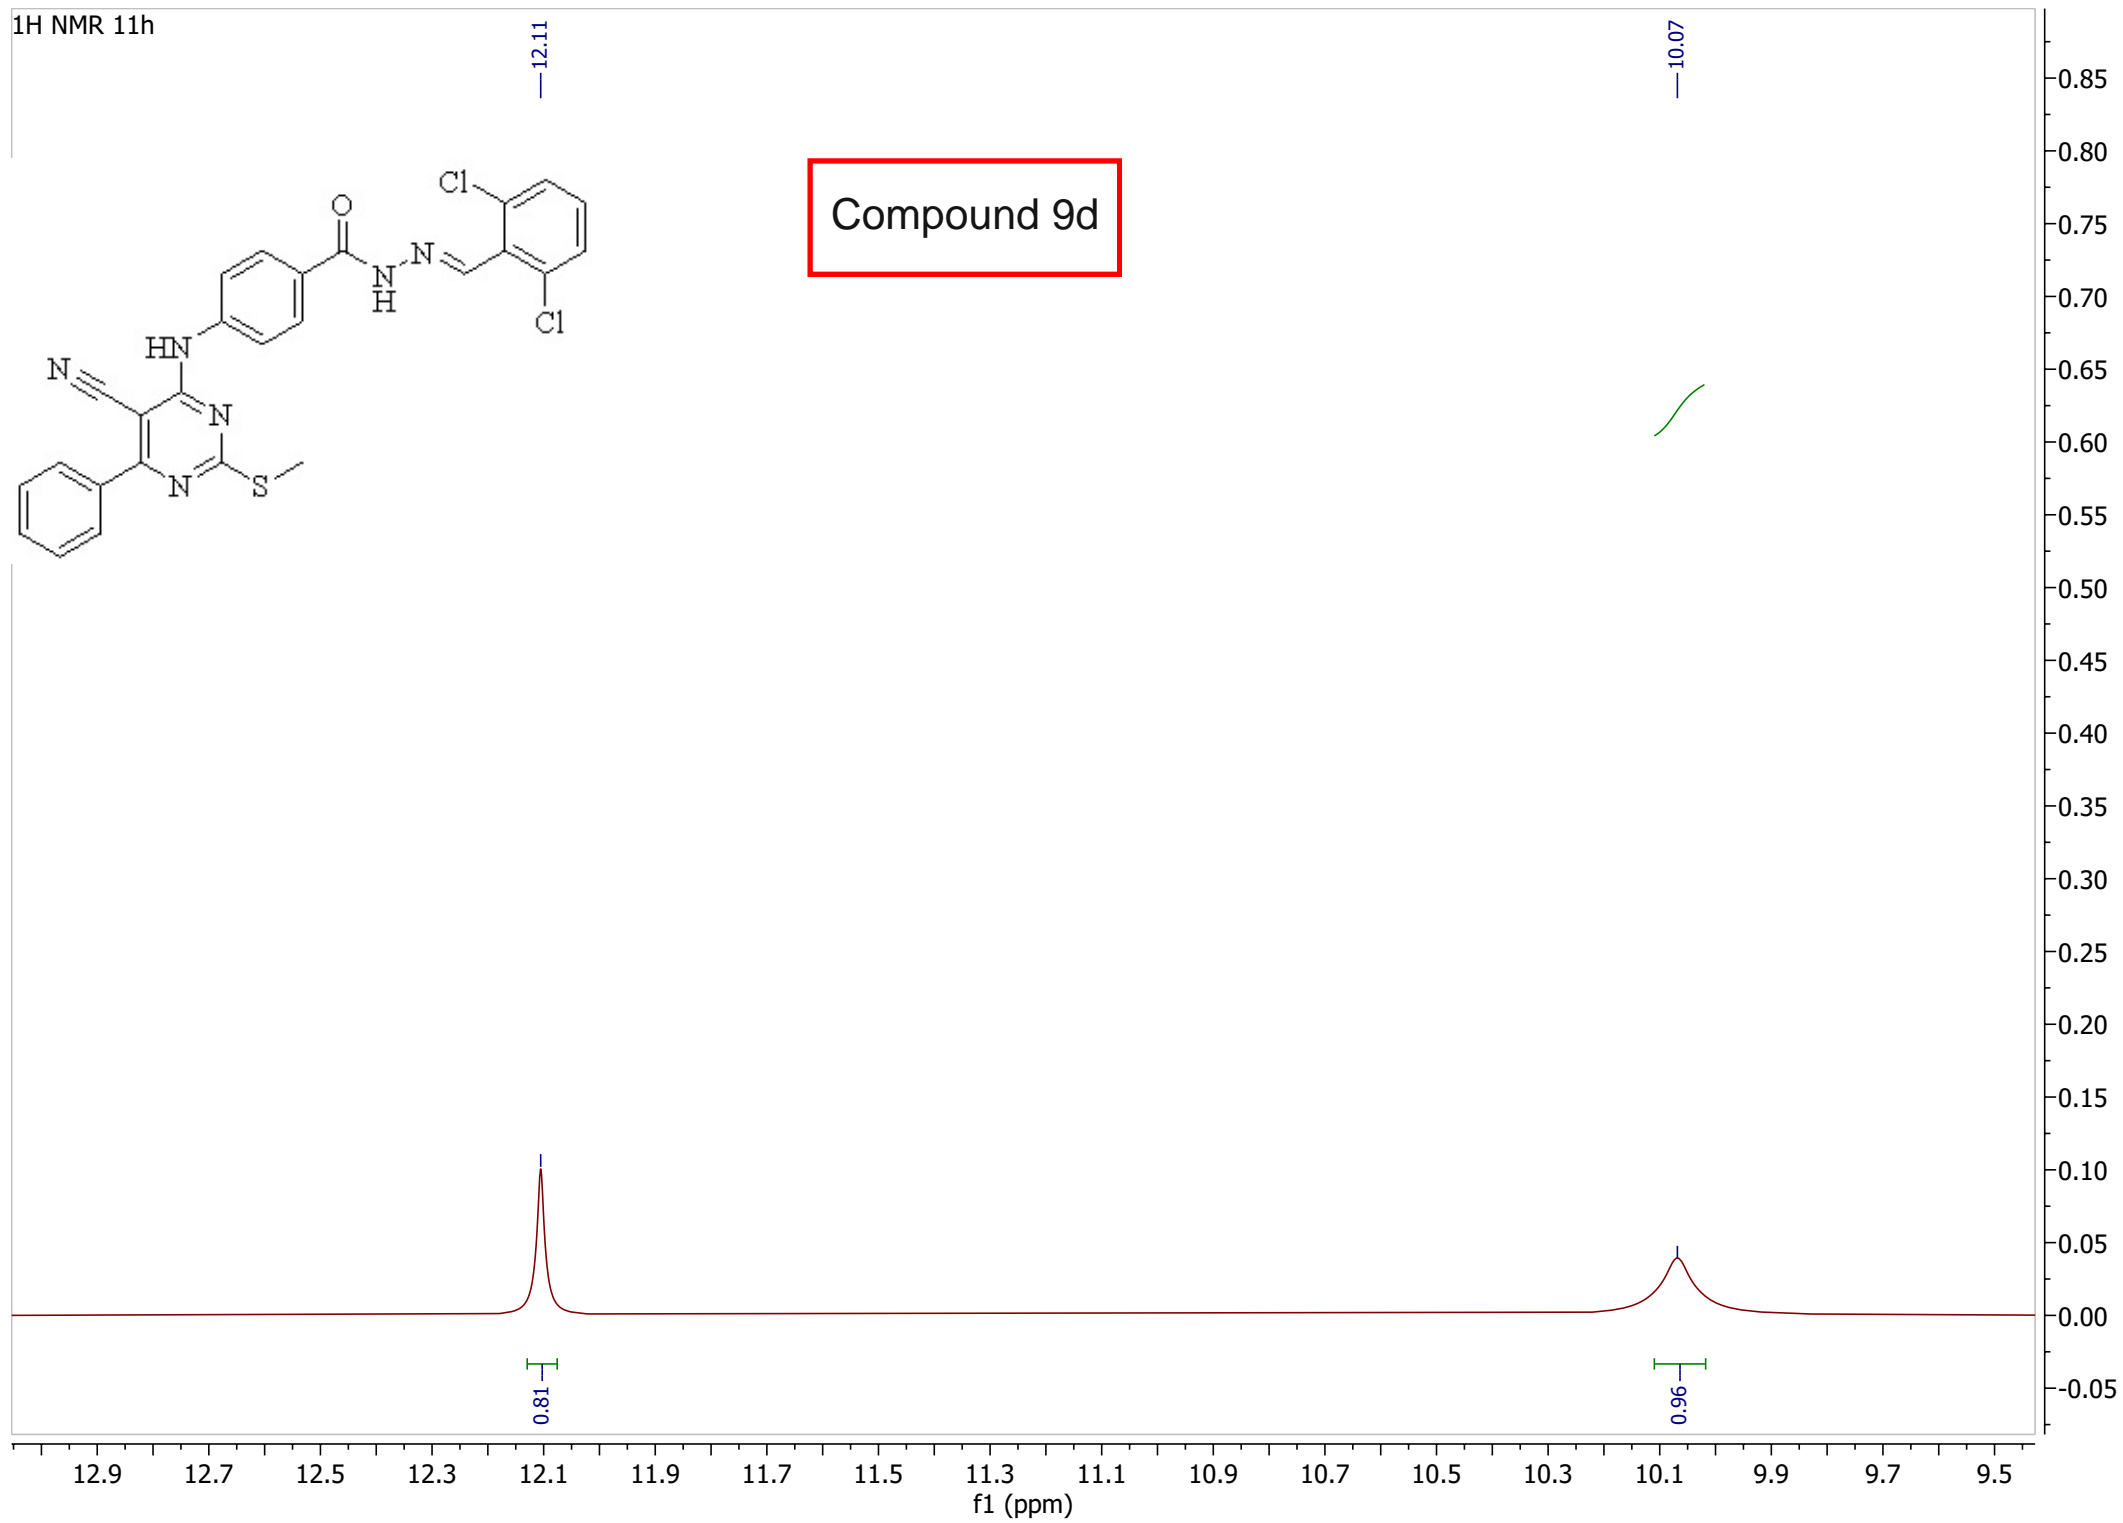

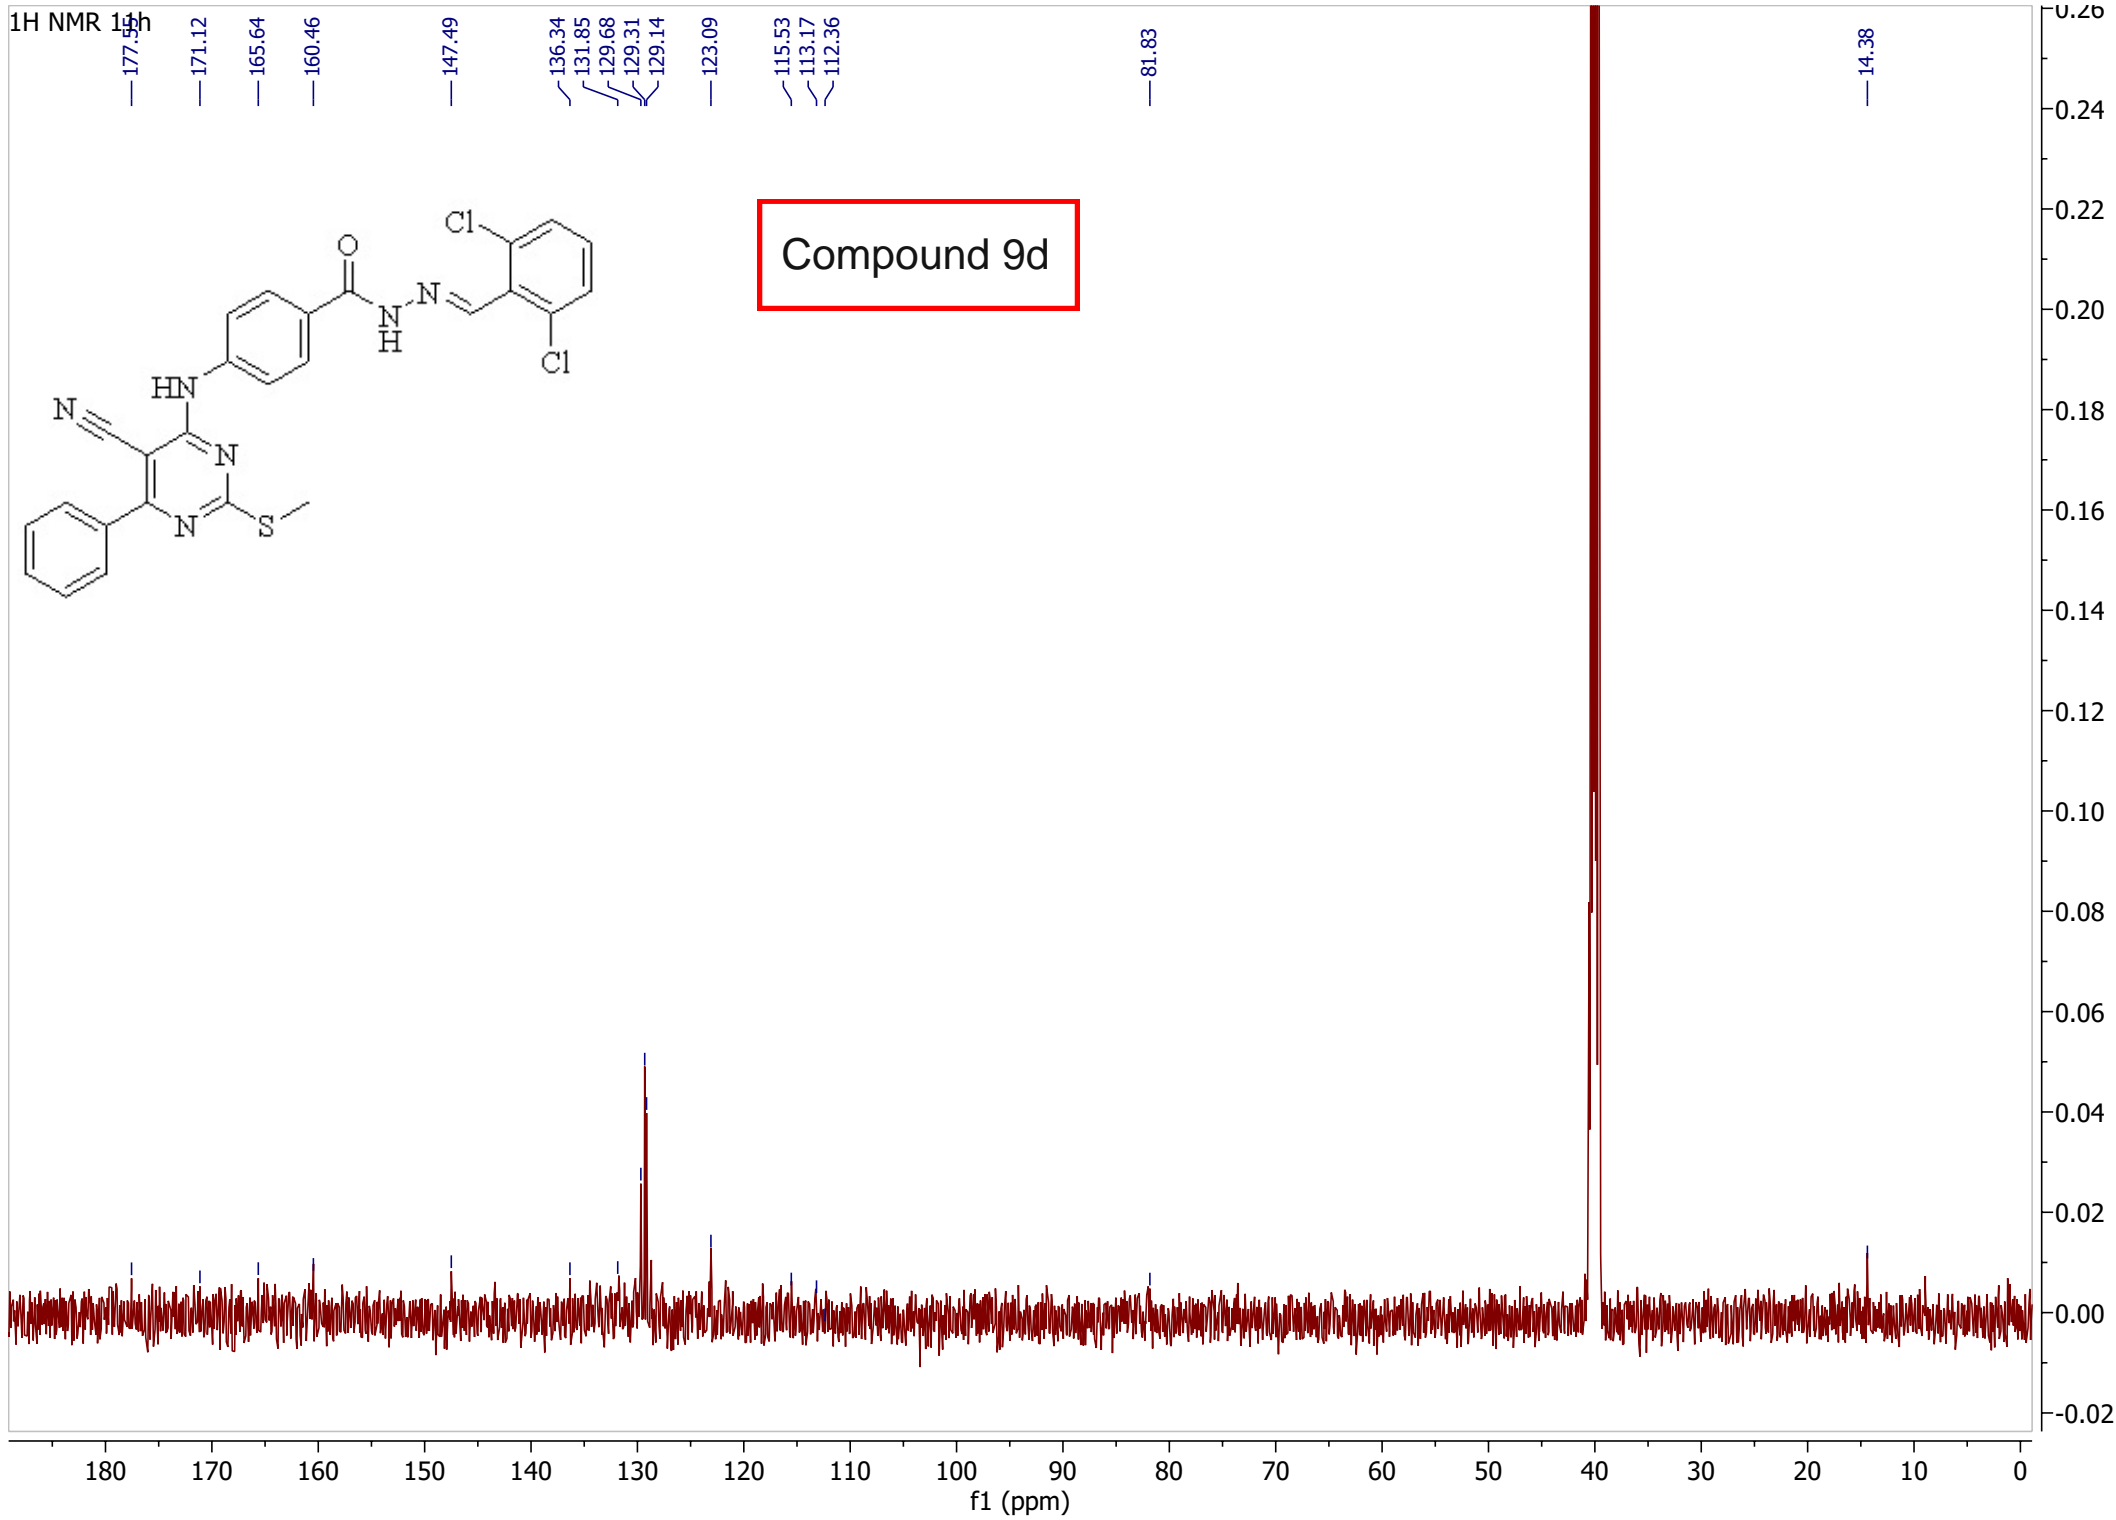

<sup>1</sup>H NMR 11h

81.83

14.38

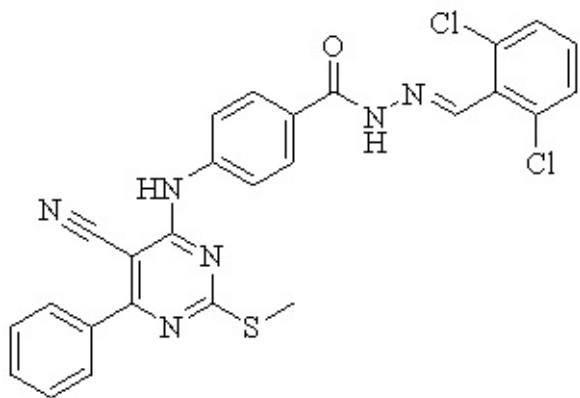

Compound 9d

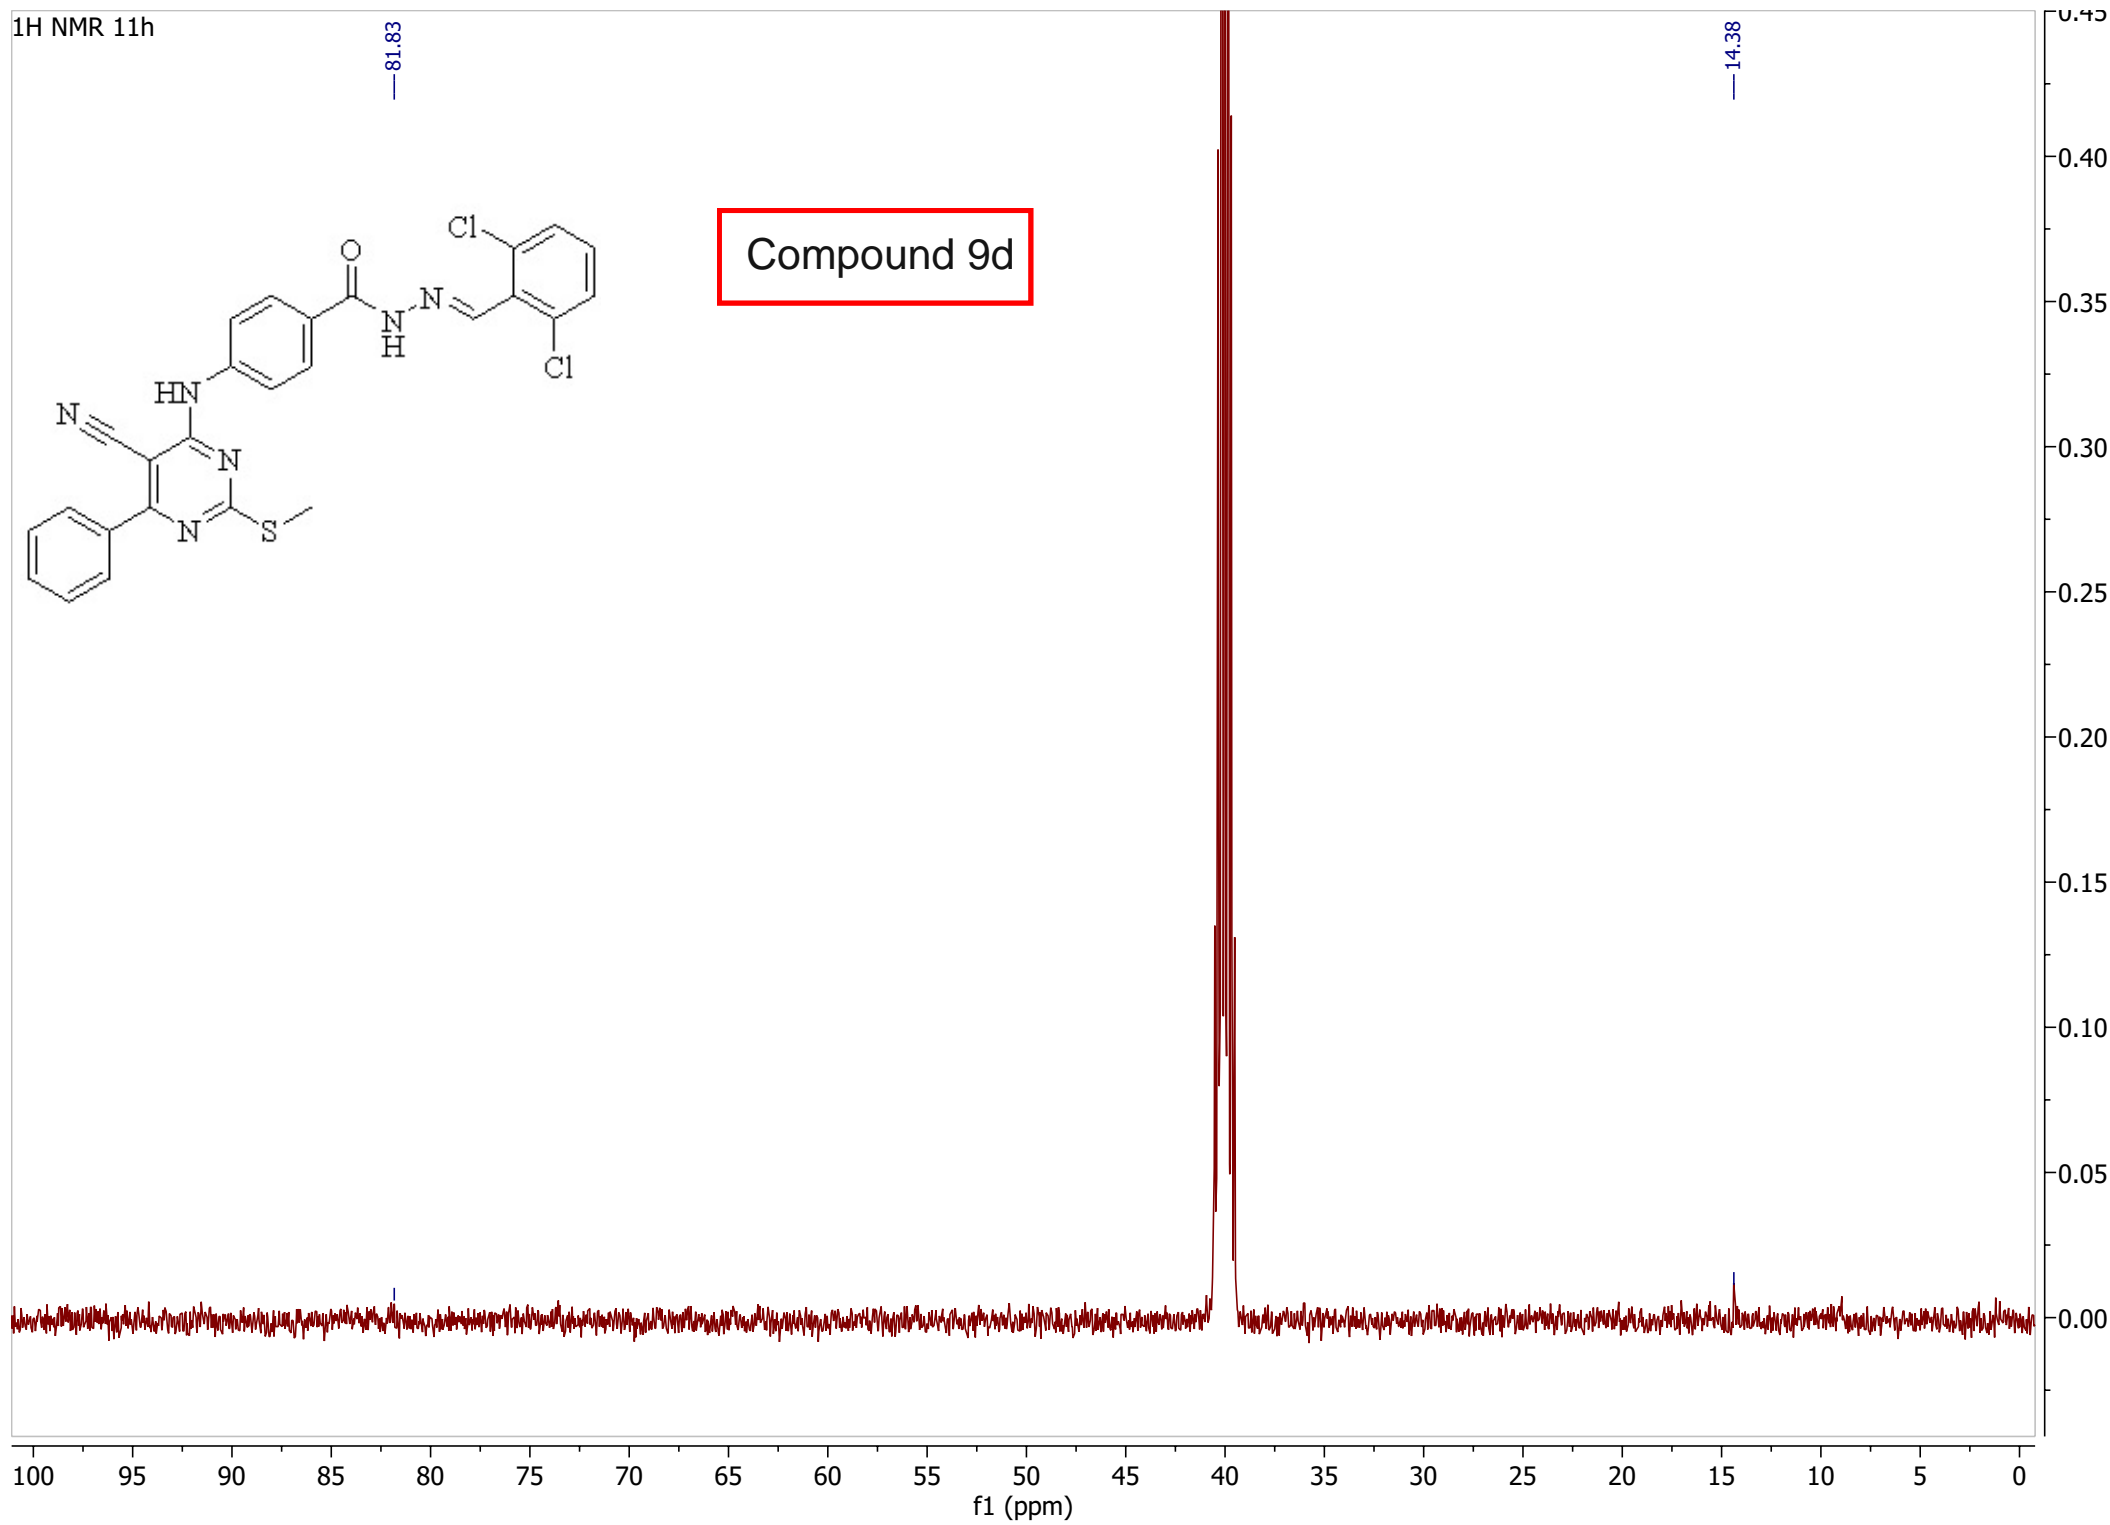

<sup>1</sup>H NMR 11h

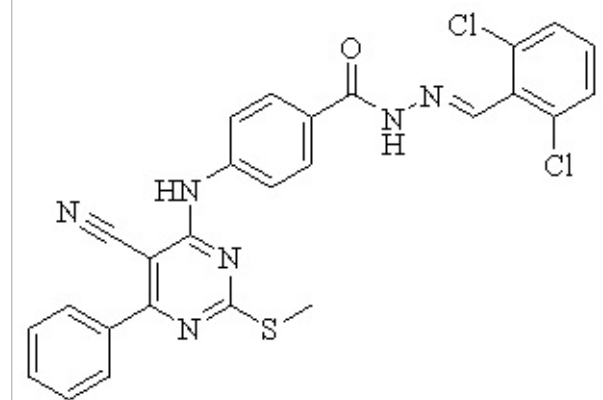

Compound 9d

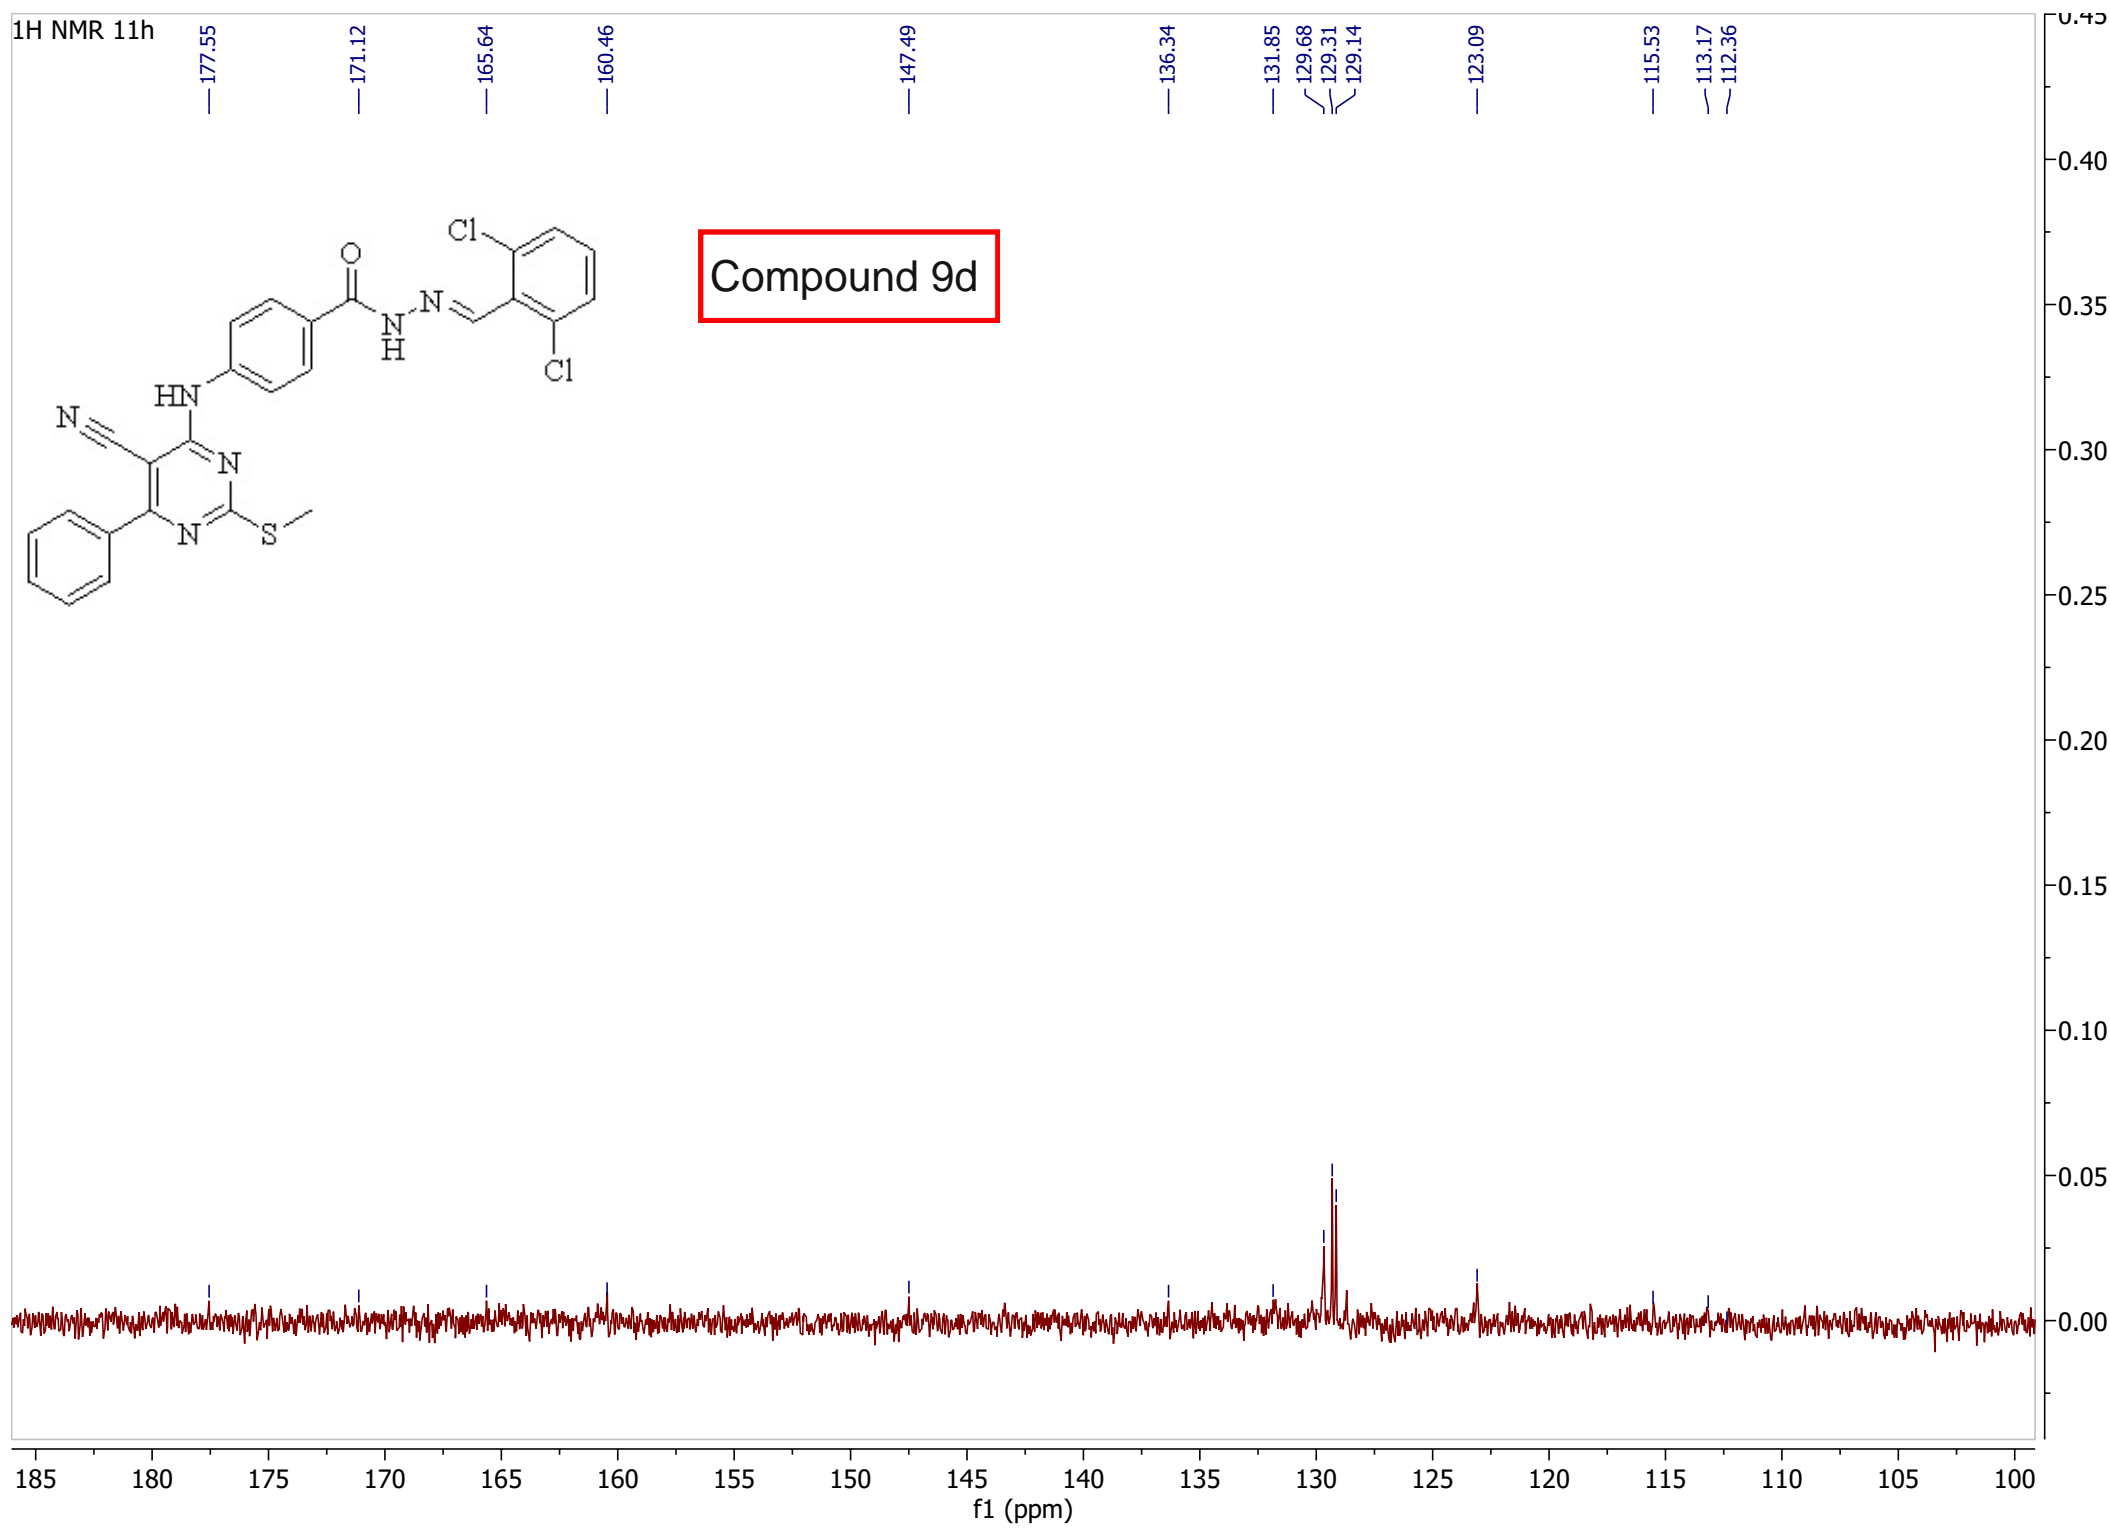

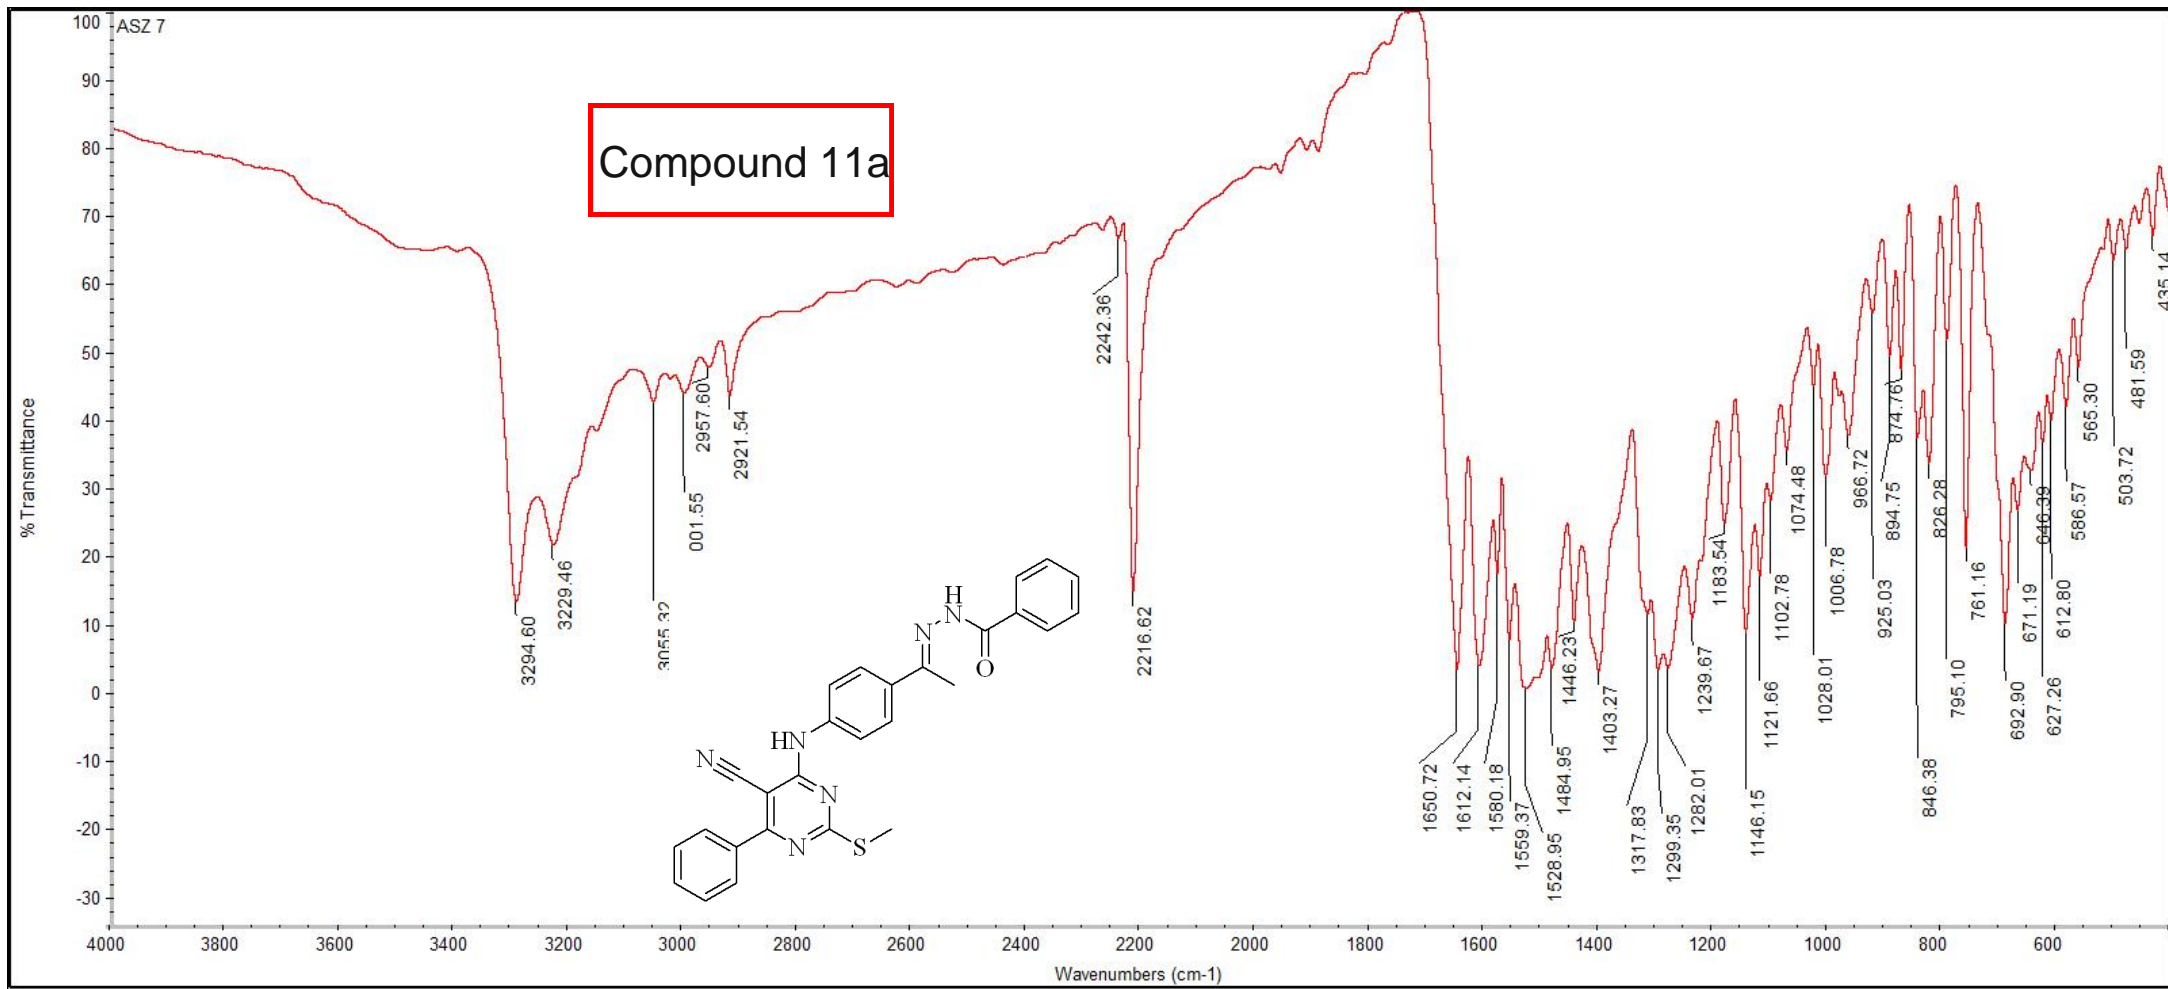



<sup>1</sup>H NMR 11a

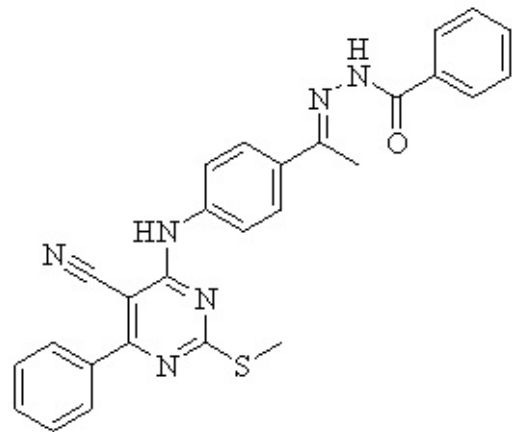

Compound 11a

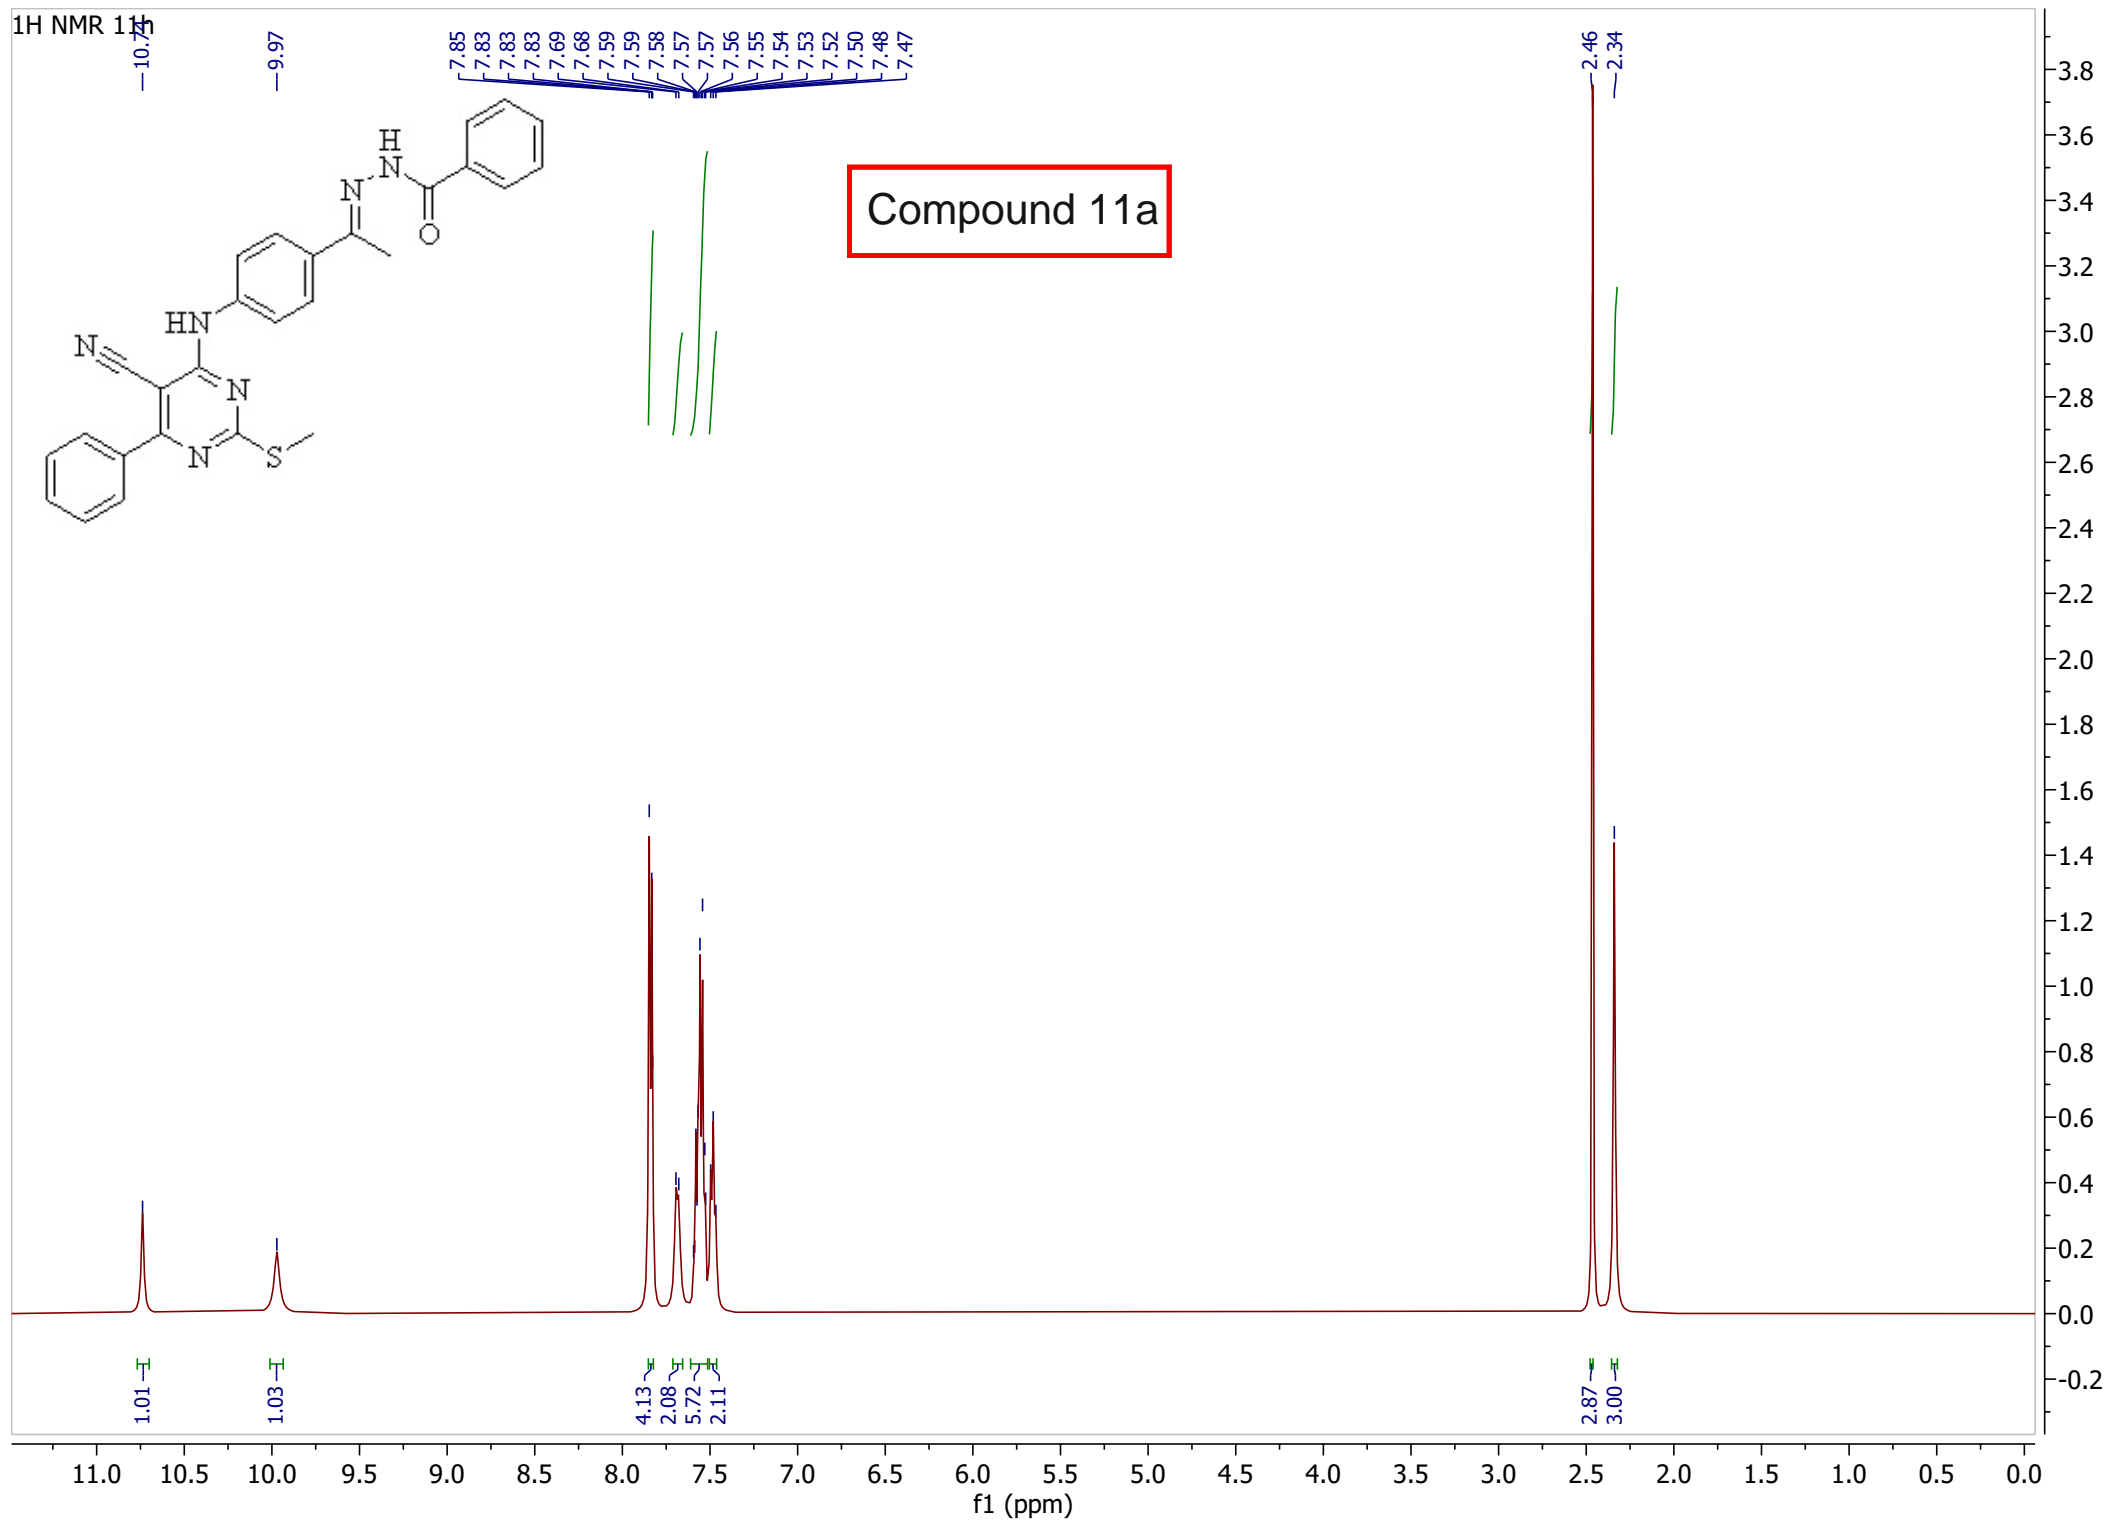

<sup>1</sup>H NMR 11h

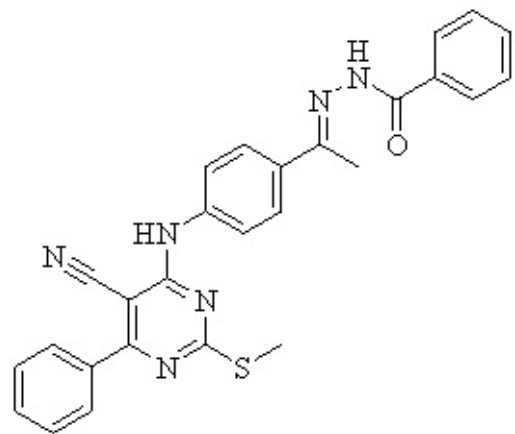

Compound 11a

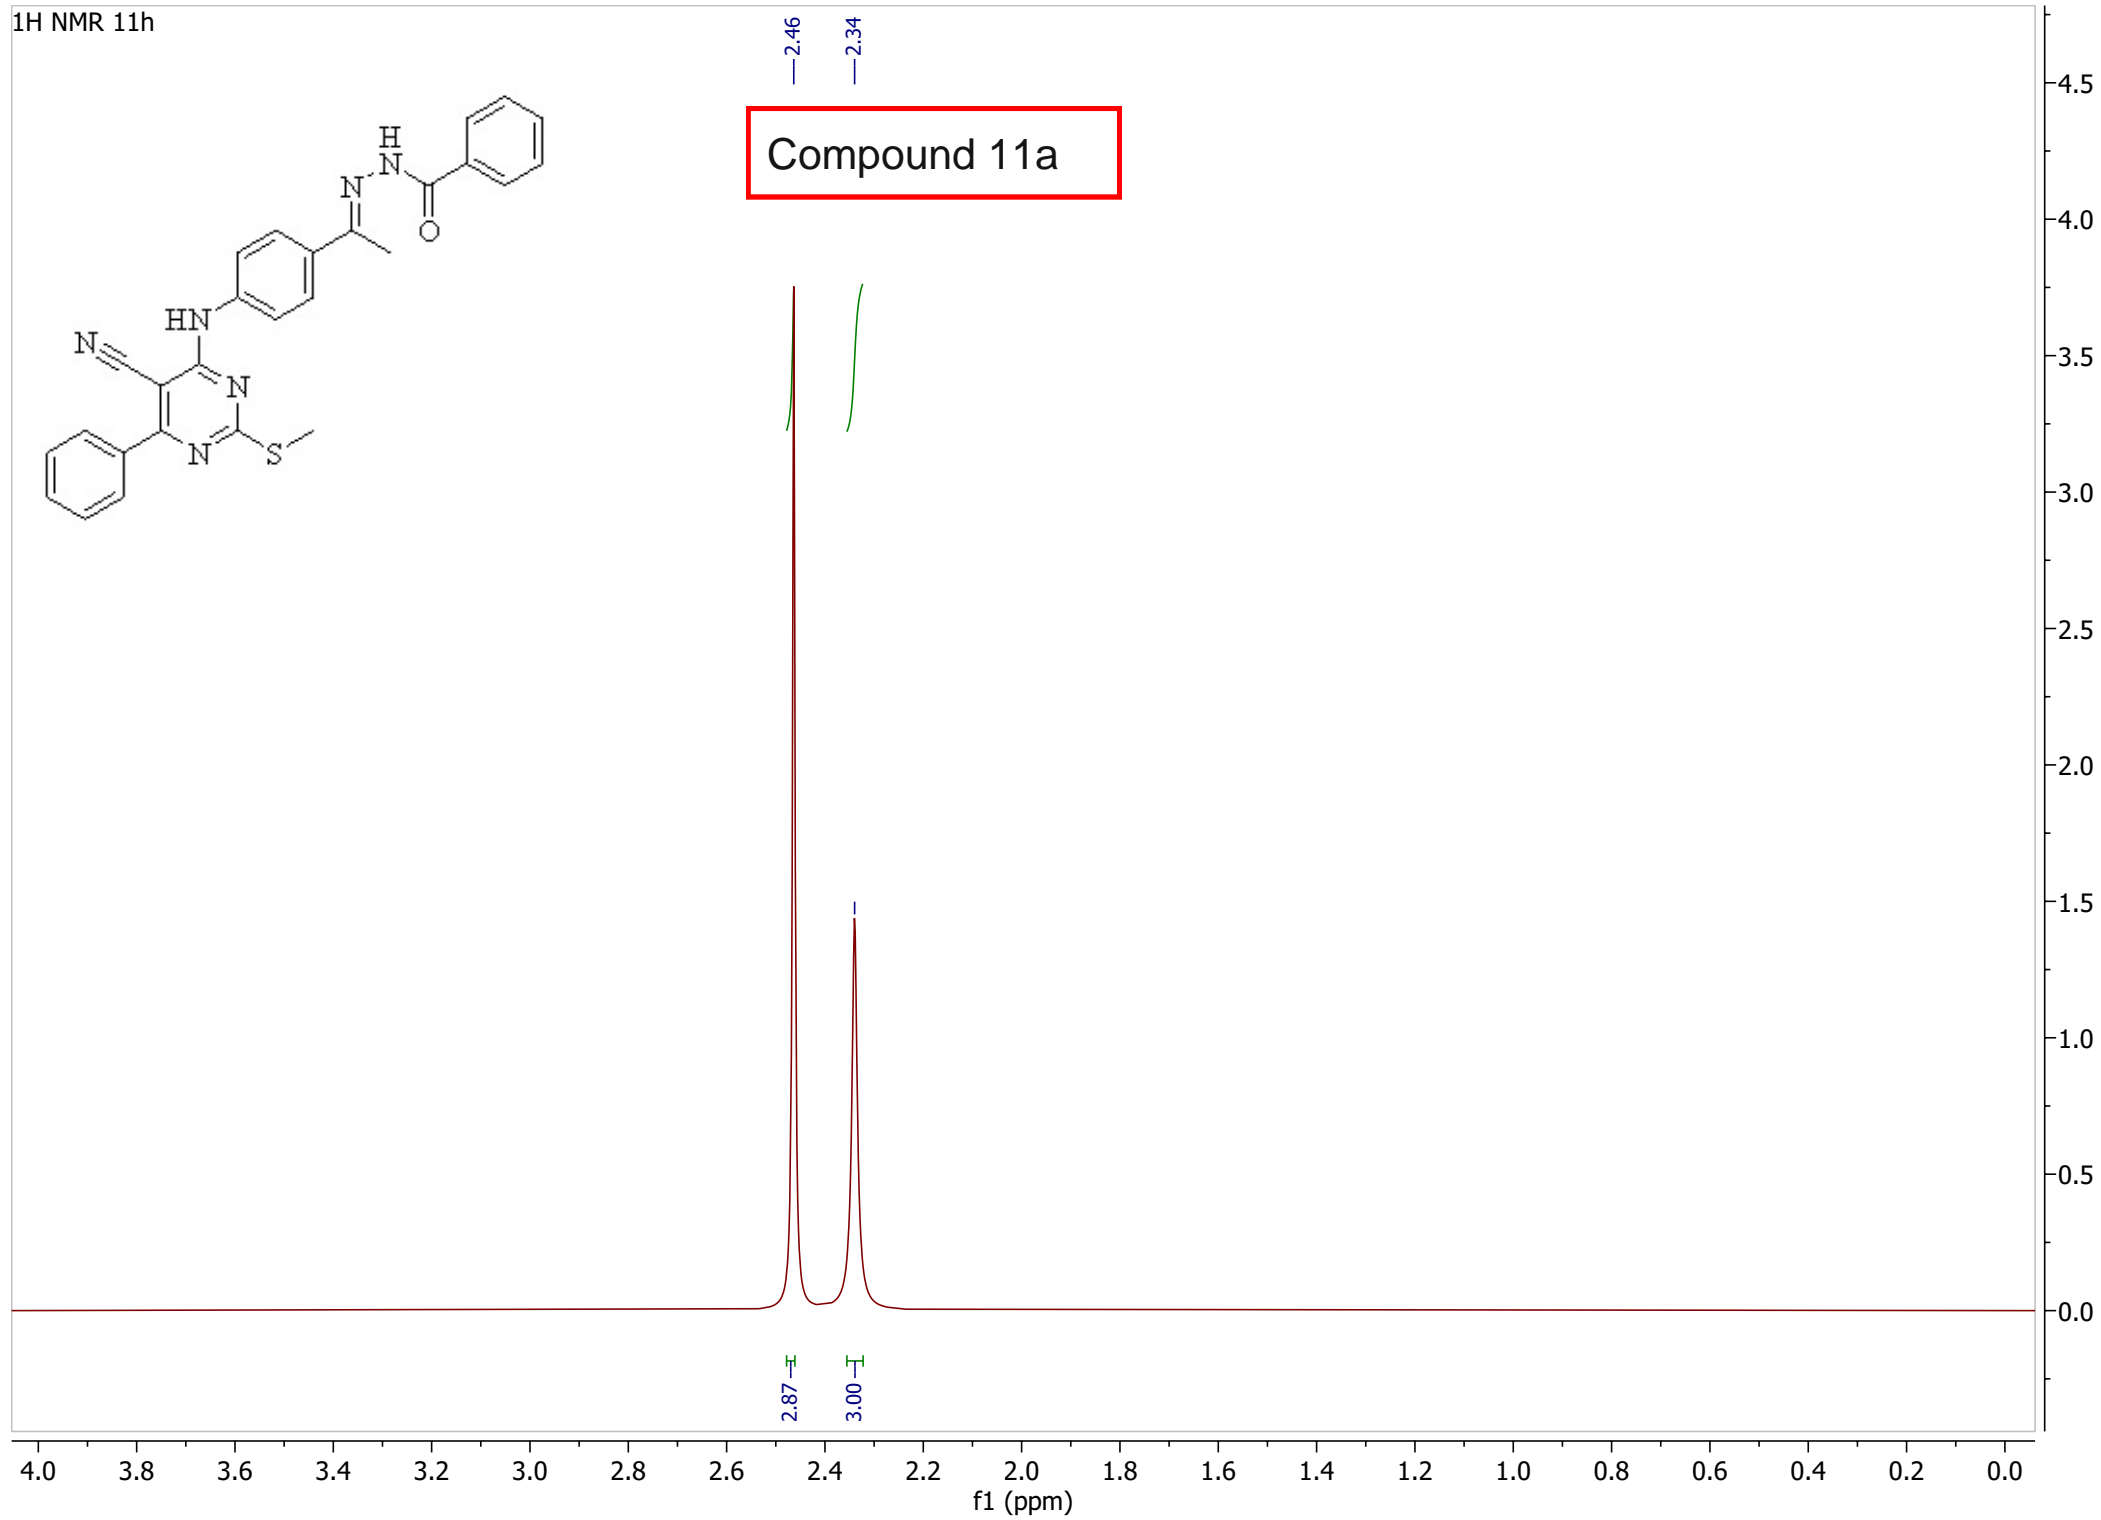

<sup>1</sup>H NMR 11h

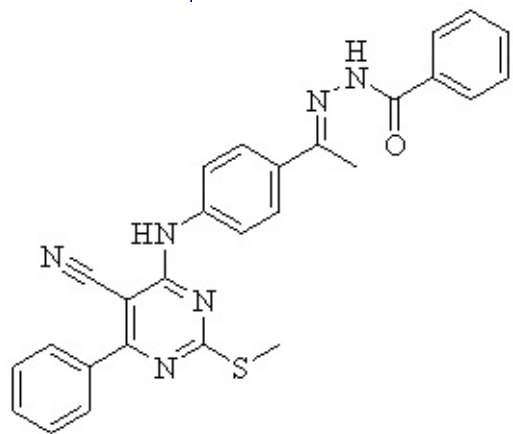

Compound 11a

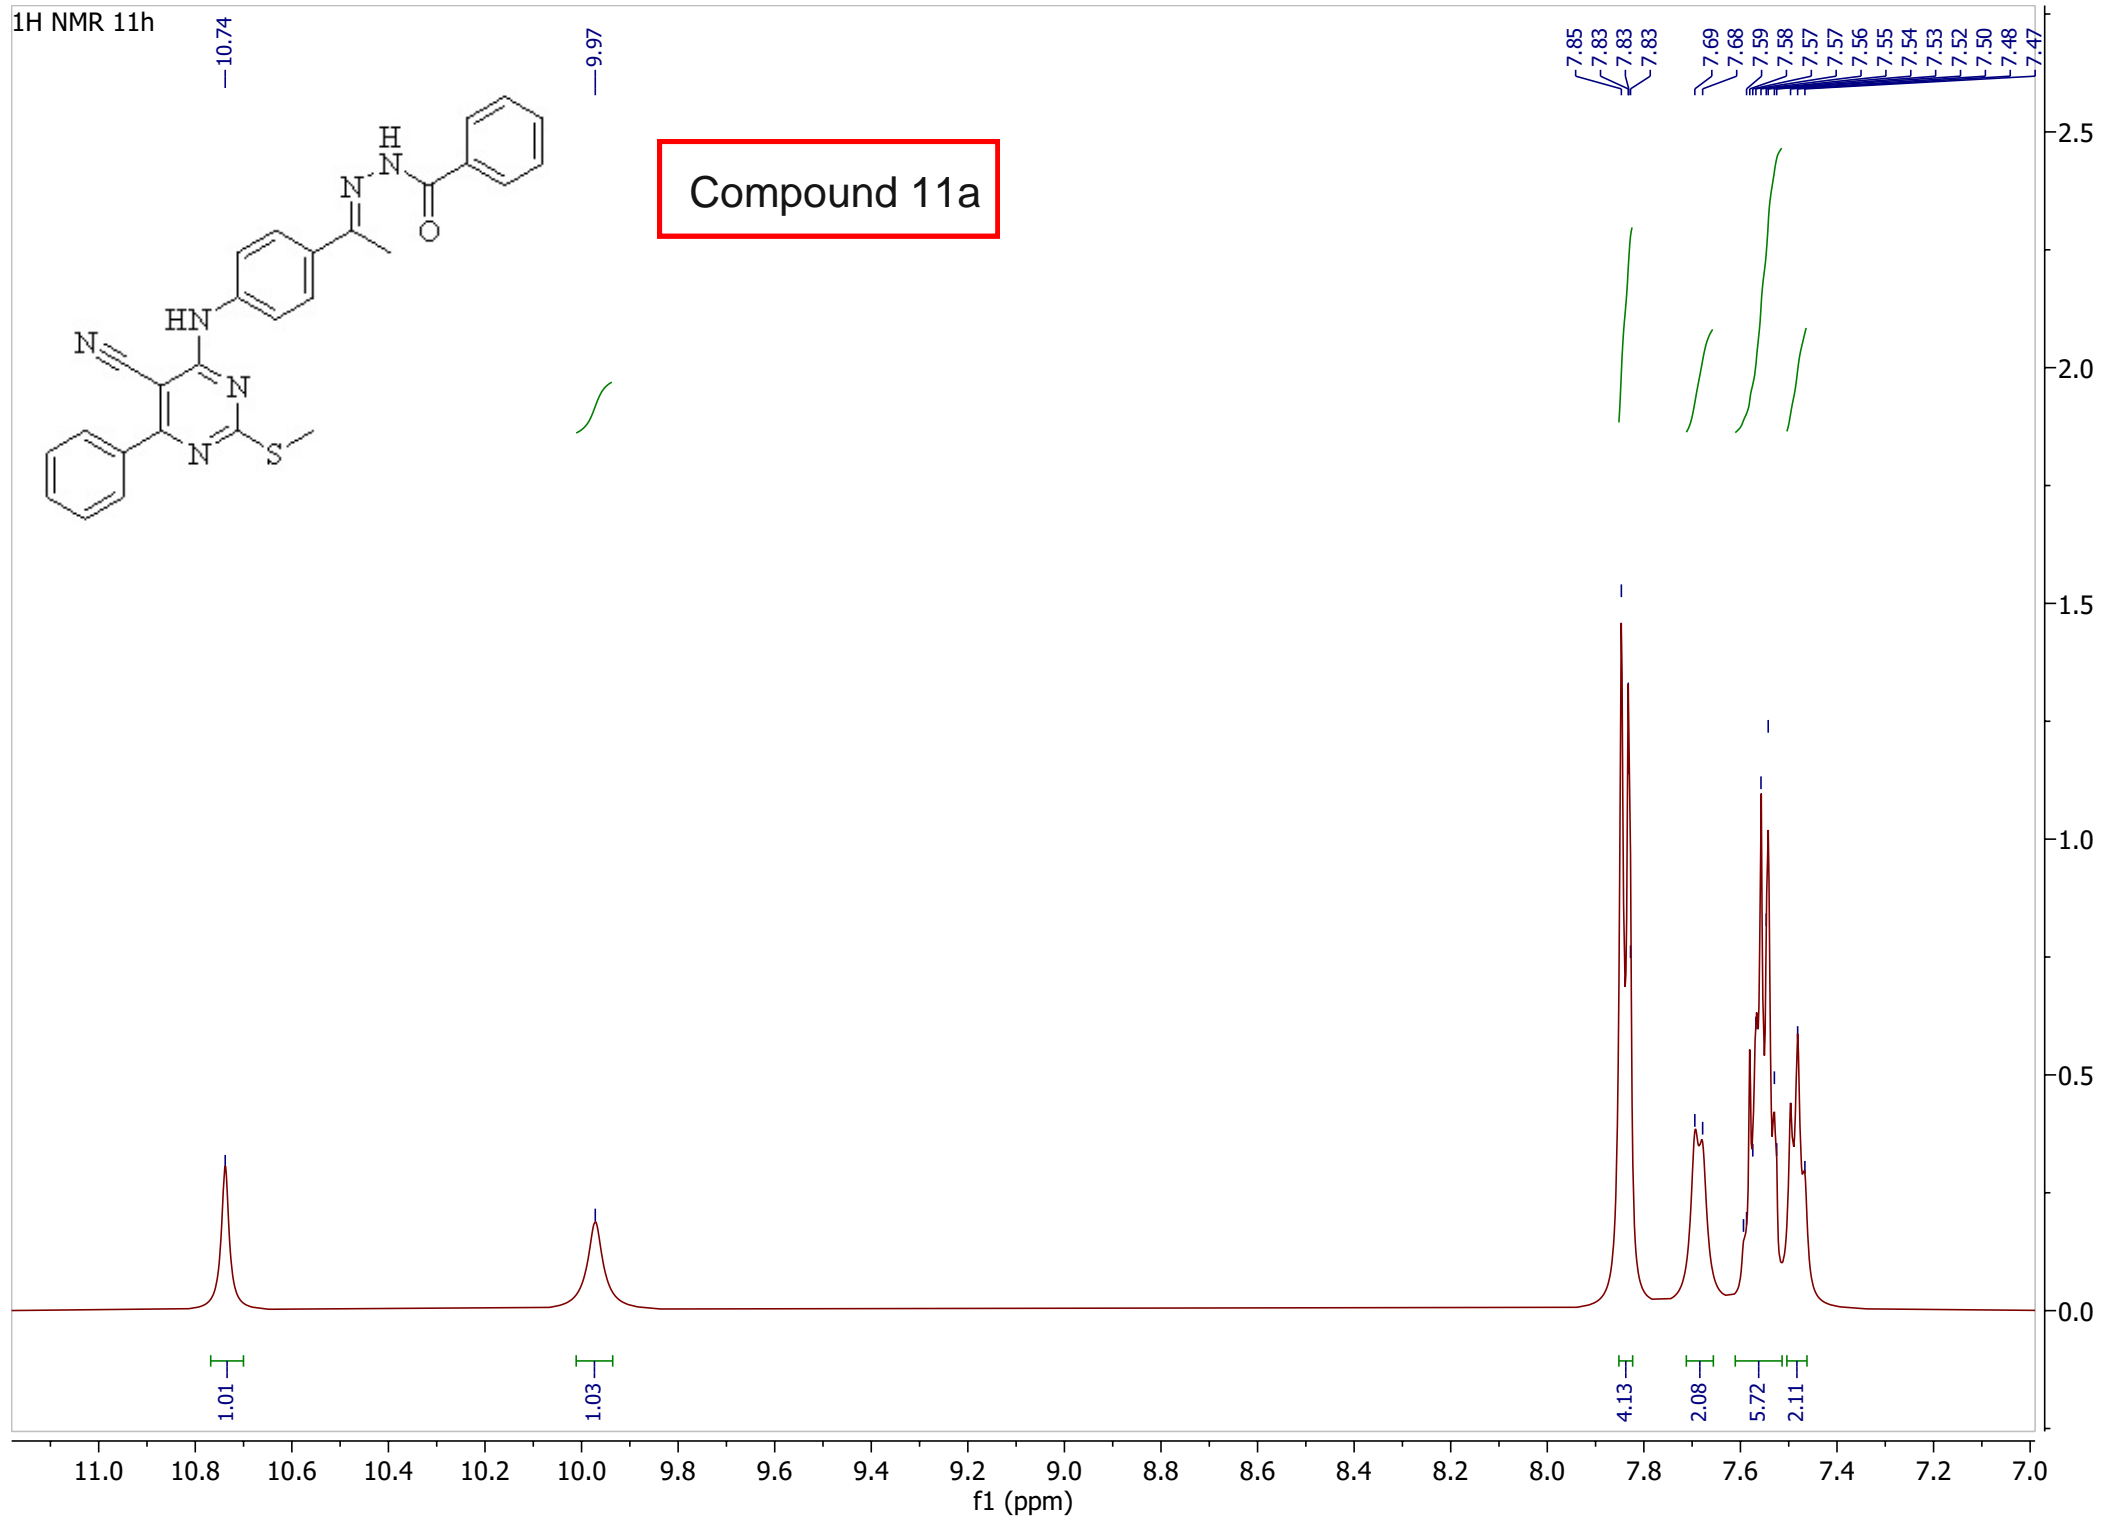

<sup>1</sup>H NMR

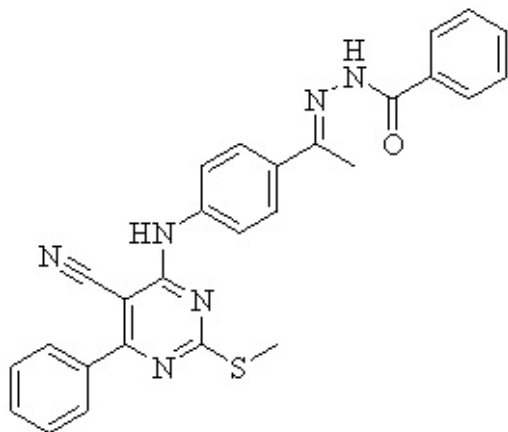

Compound 11a

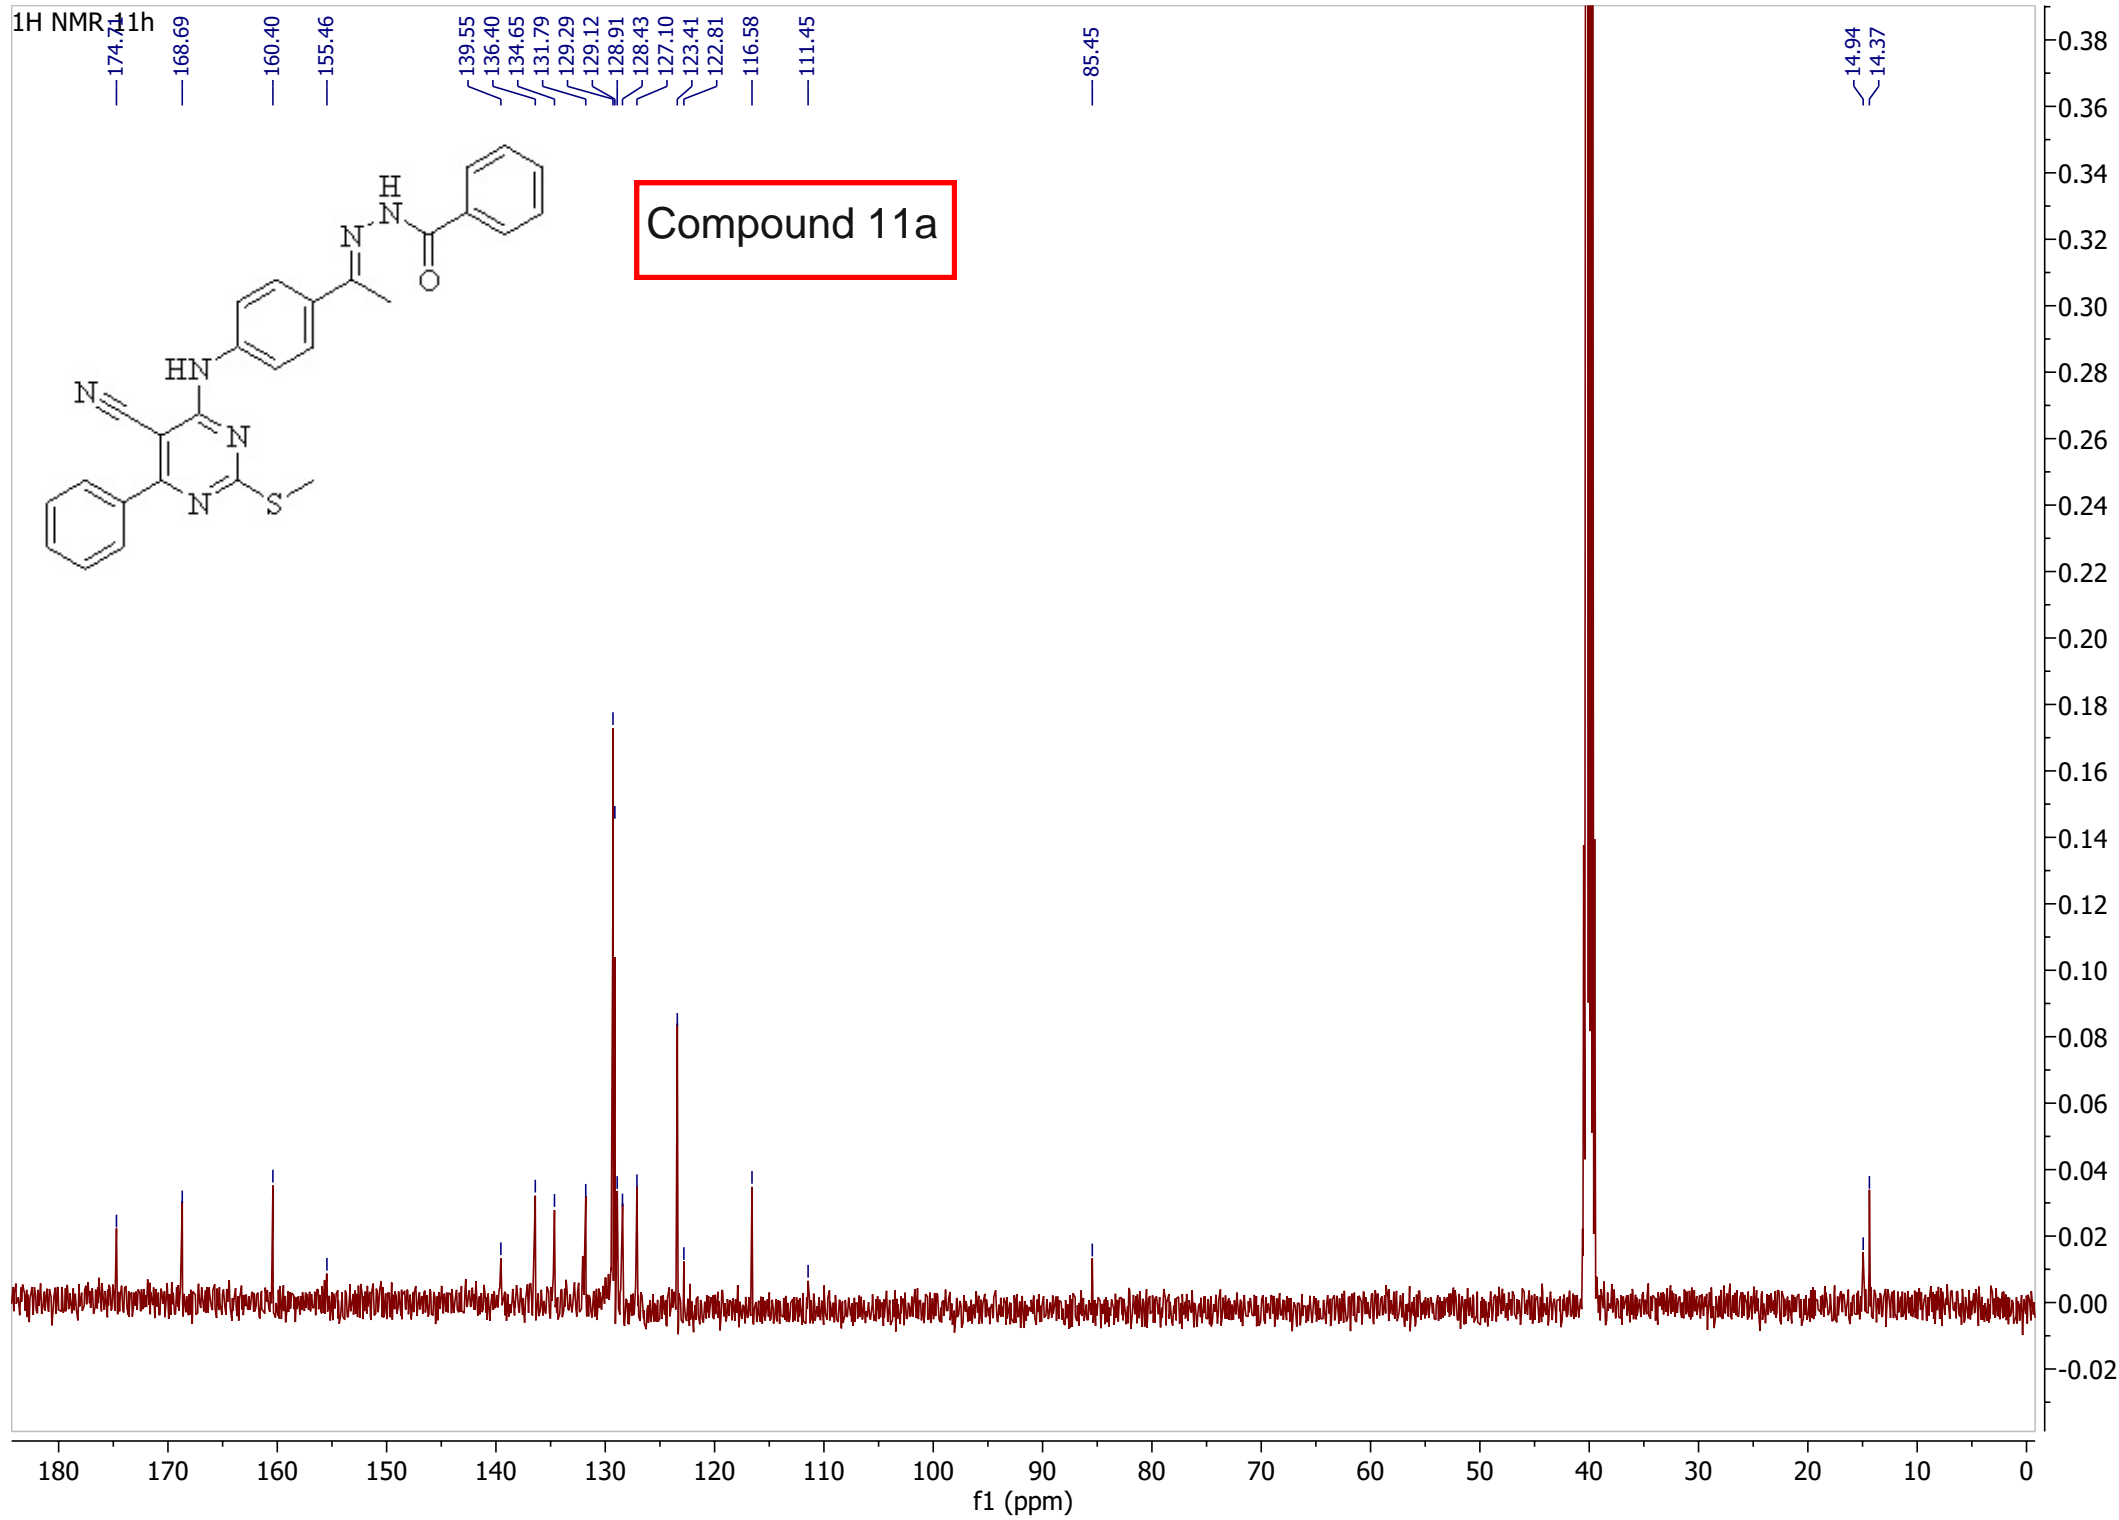

<sup>1</sup>H NMR 11h

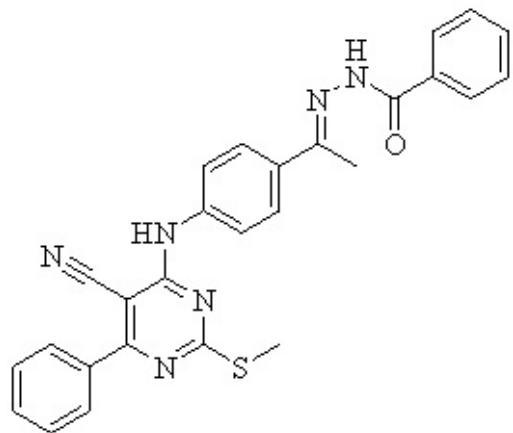

Compound 11a

85.45

14.94  
14.37

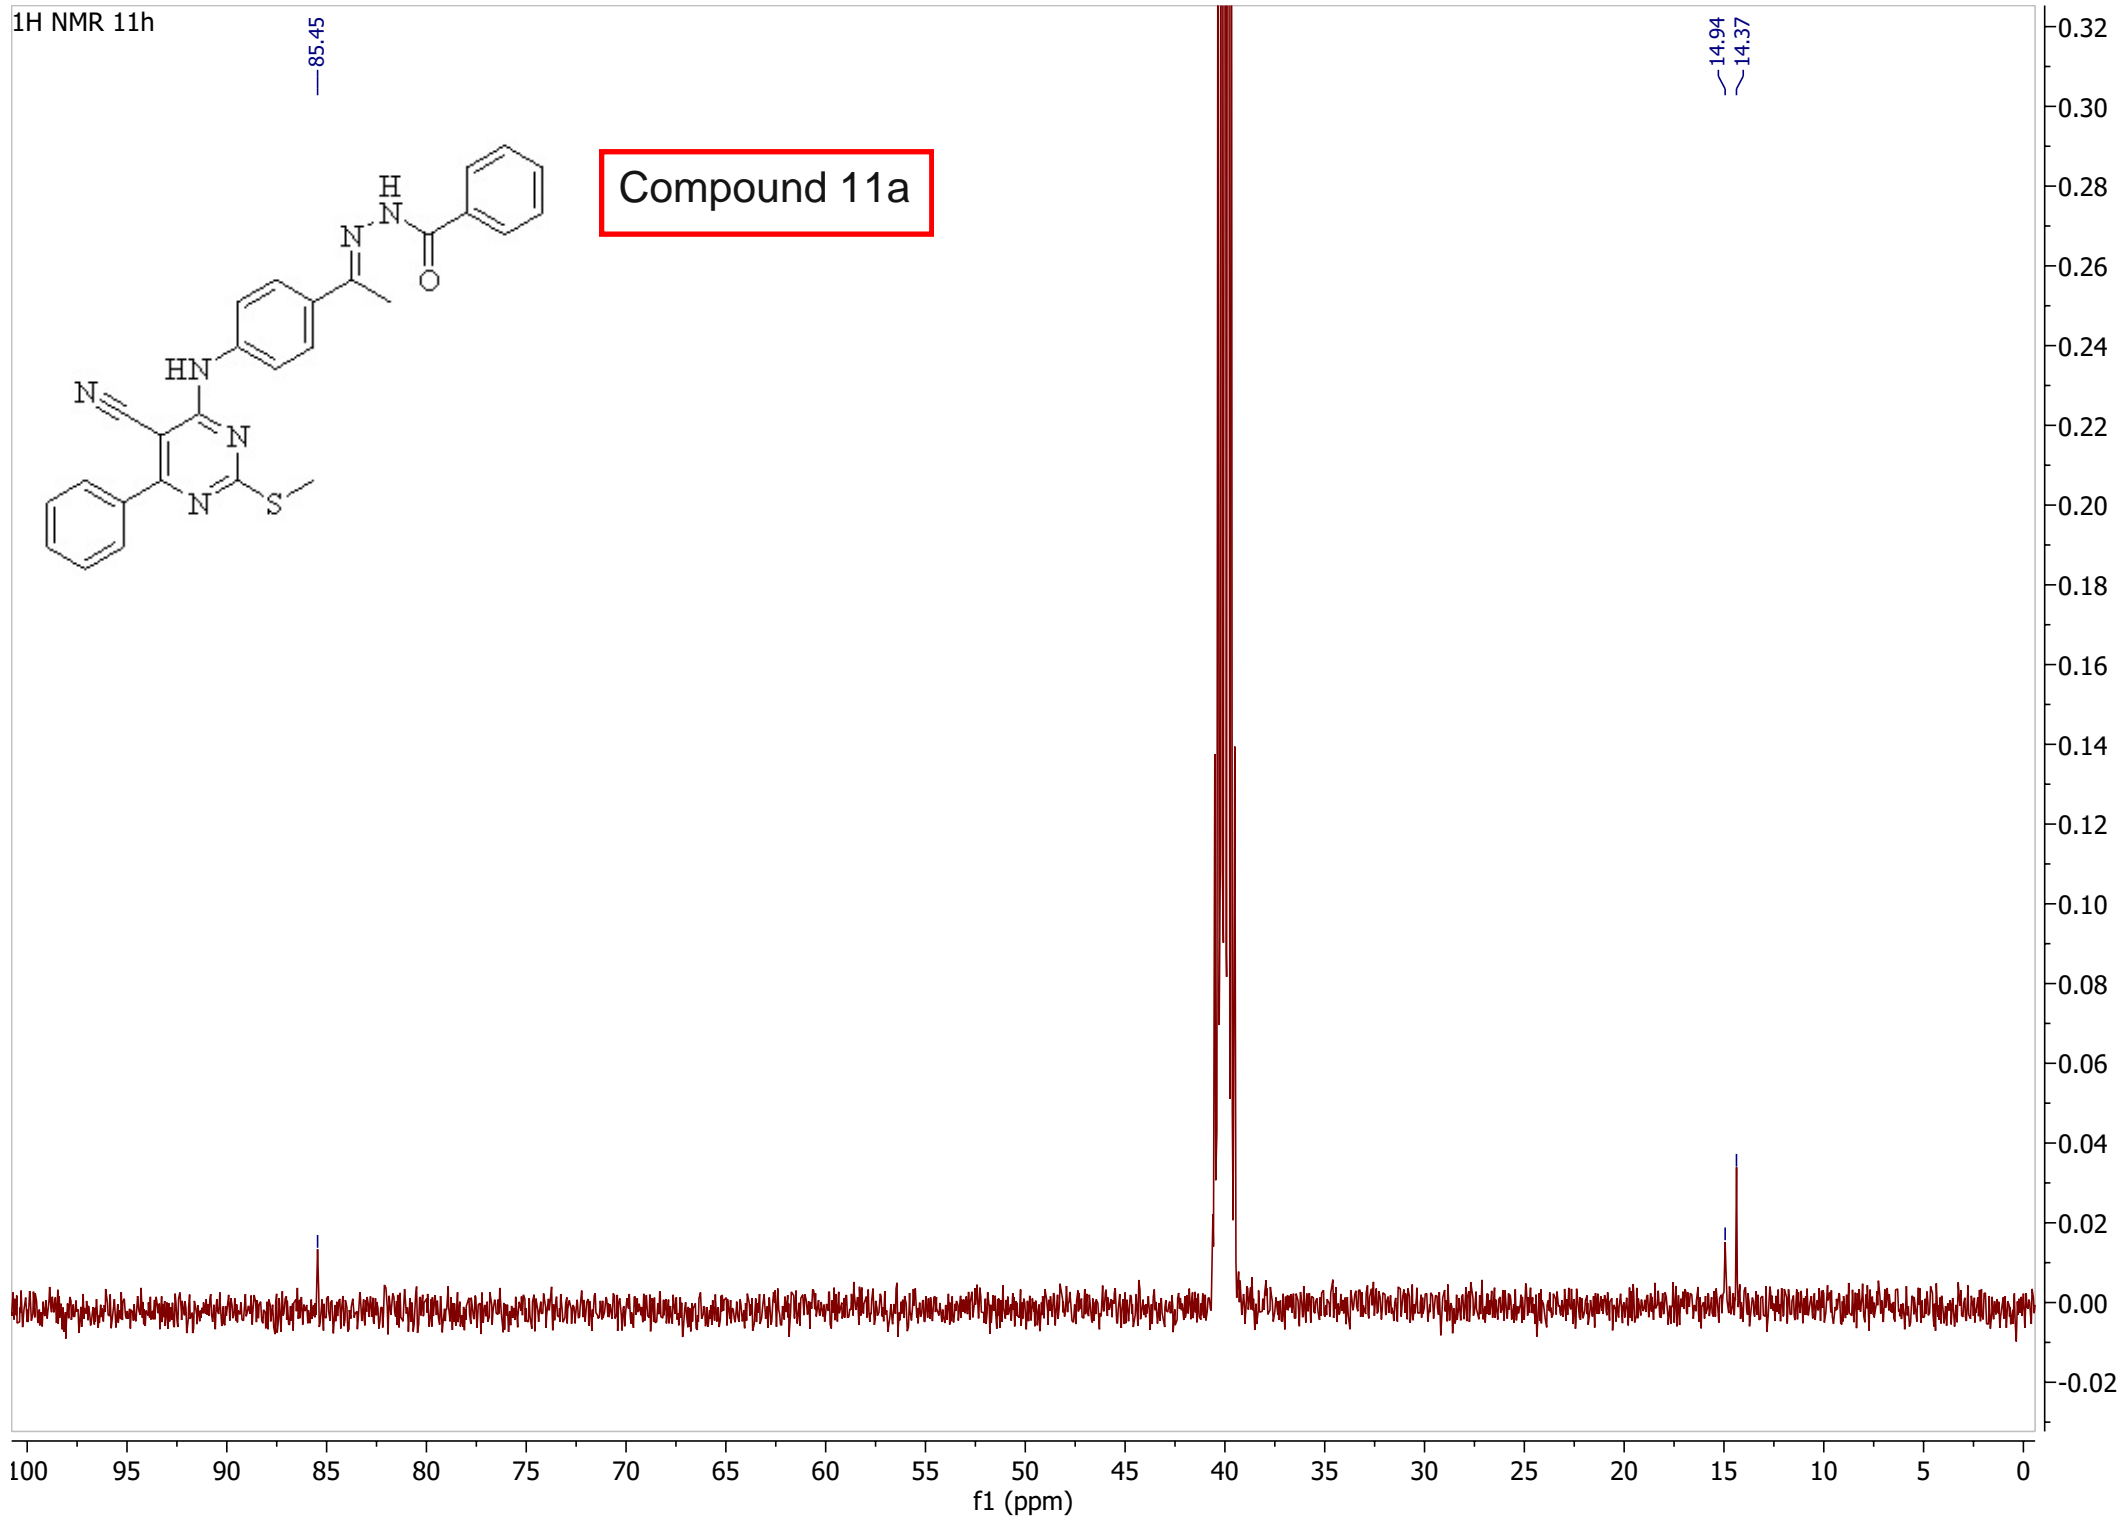

<sup>1</sup>H NMR 11h

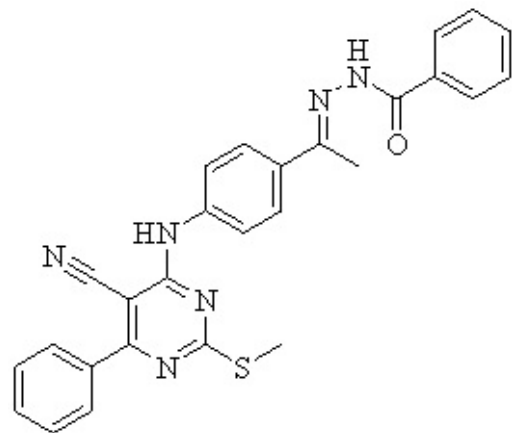

Compound 11a

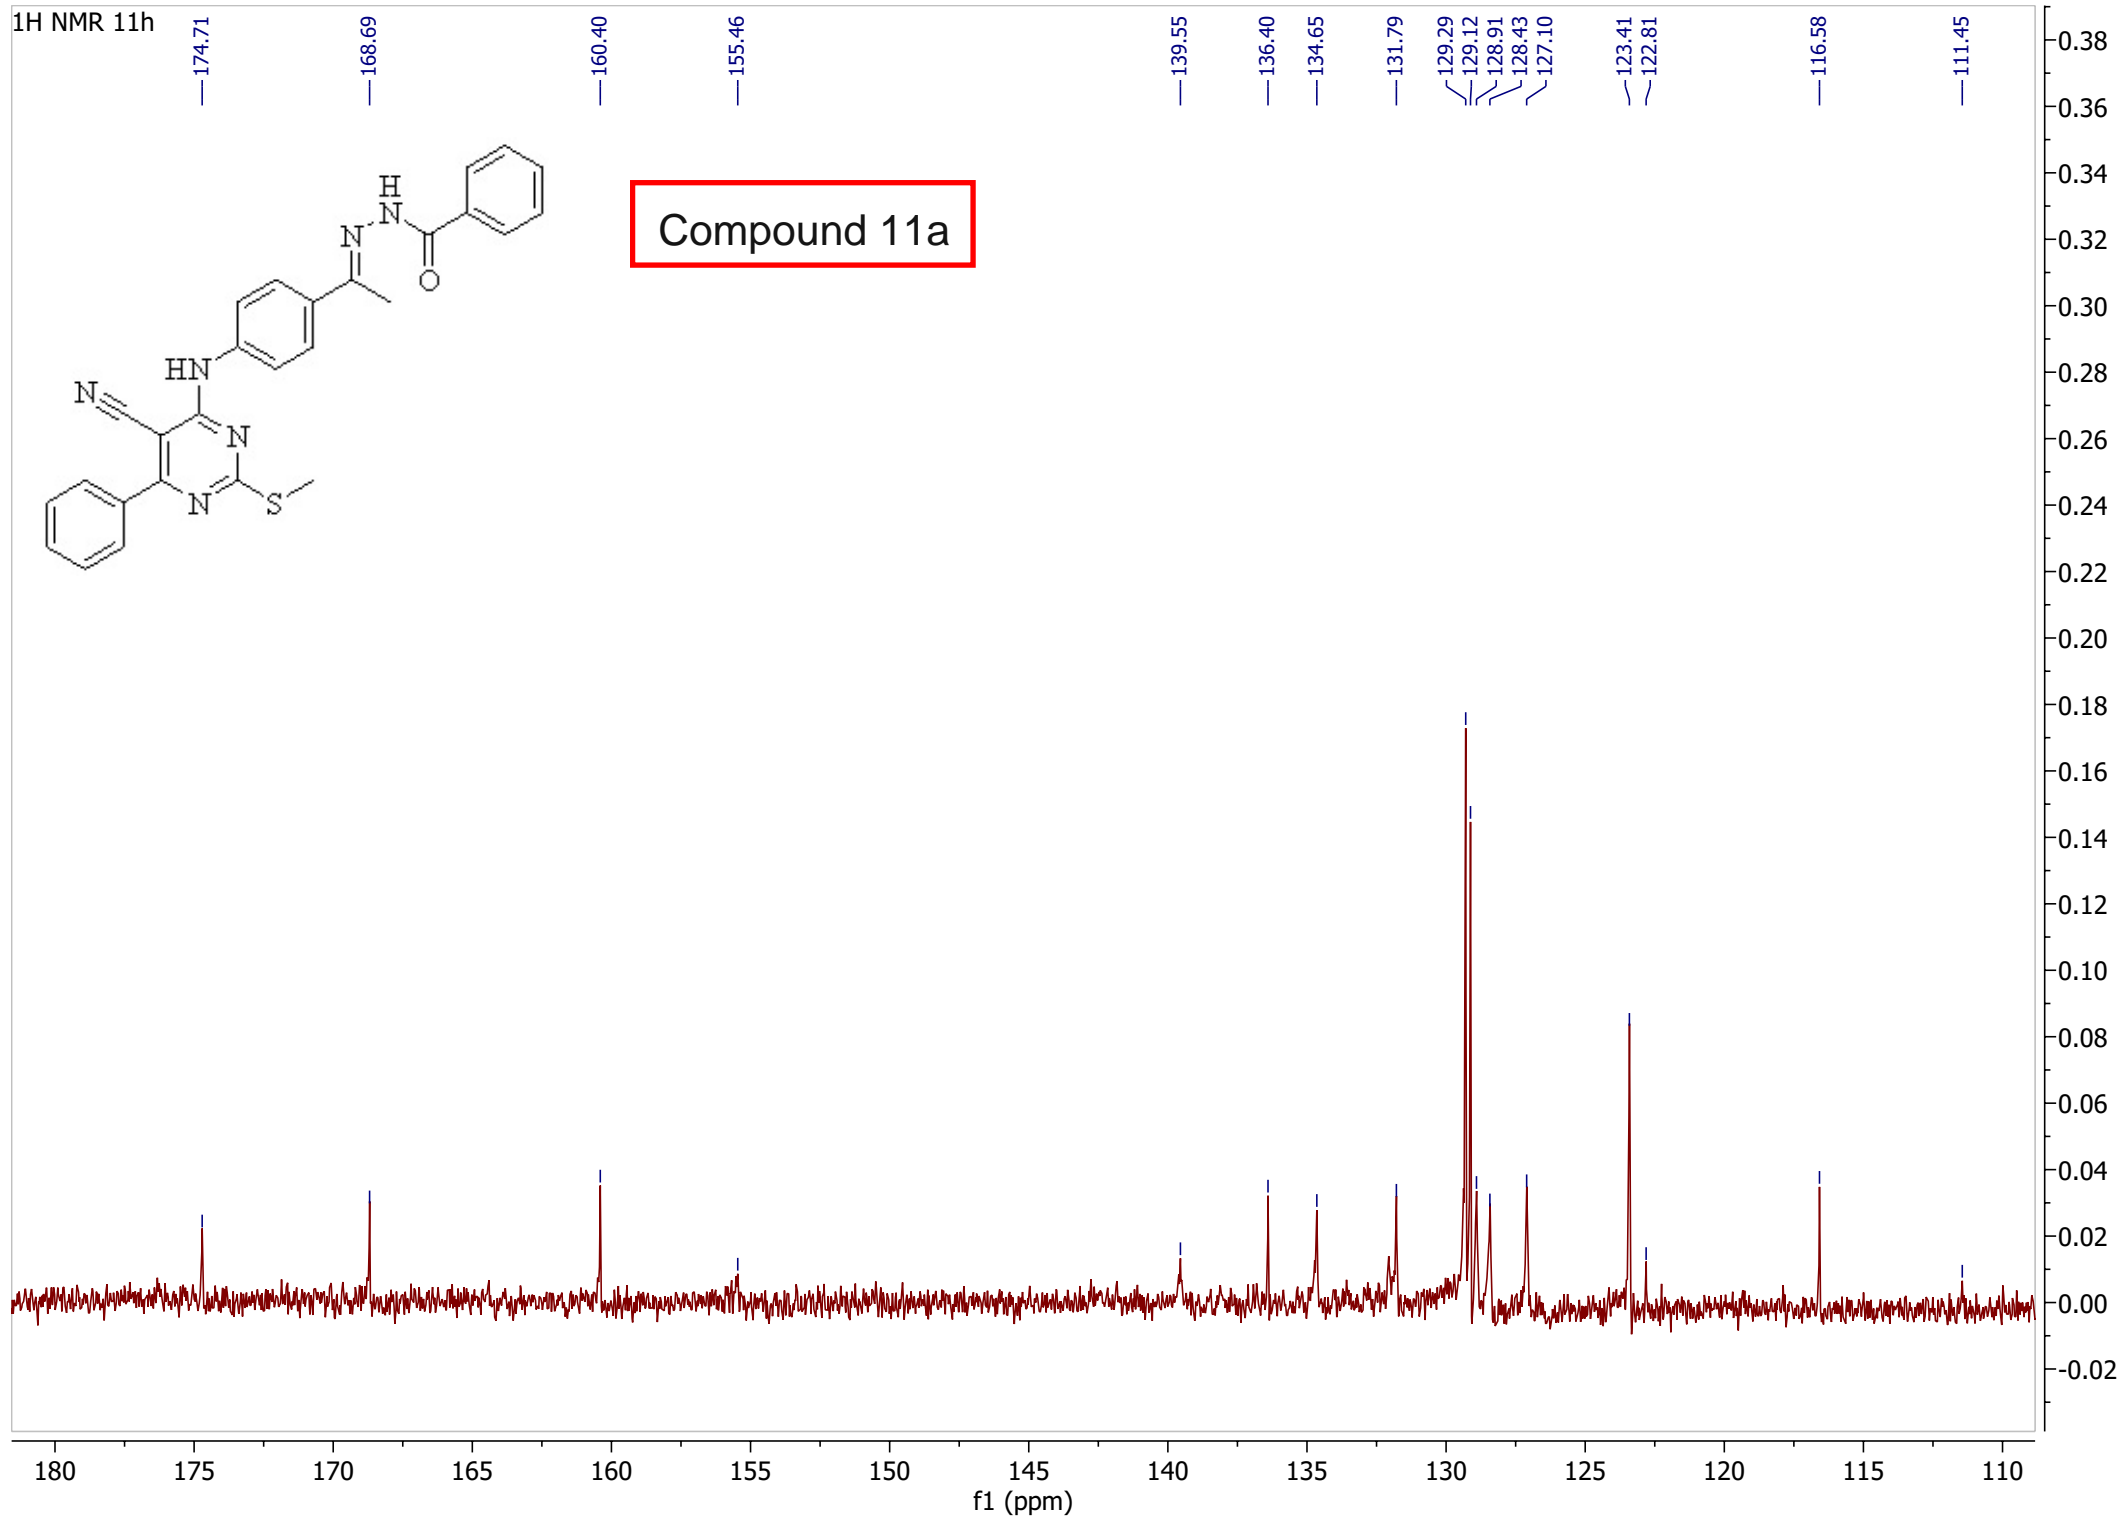

# SAMPLE INFORMATION

|                   |                          |                     |                                 |
|-------------------|--------------------------|---------------------|---------------------------------|
| Sample Name:      | ASZ3 <b>Compound 11b</b> | Acquired By:        | System                          |
| Sample Type:      | Unknown                  | Sample Set Name:    | 1                               |
| Vial:             | 6                        | Acq. Method Set:    | Organic                         |
| Injection #:      | 1                        | Processing Method:  | Default                         |
| Injection Volume: | 2.00 ul                  | Channel Name:       | 278.9nm                         |
| Run Time:         | 14.5 Minutes             | Proc. Chnl. Descr.: | W2996 FDA 278.9 nm(FDA 190.0 to |

Date Acquired: 11/5/2022 11:30:47 PMEET  
 Date Processed: 11/6/2022 5:22:27 AMEET

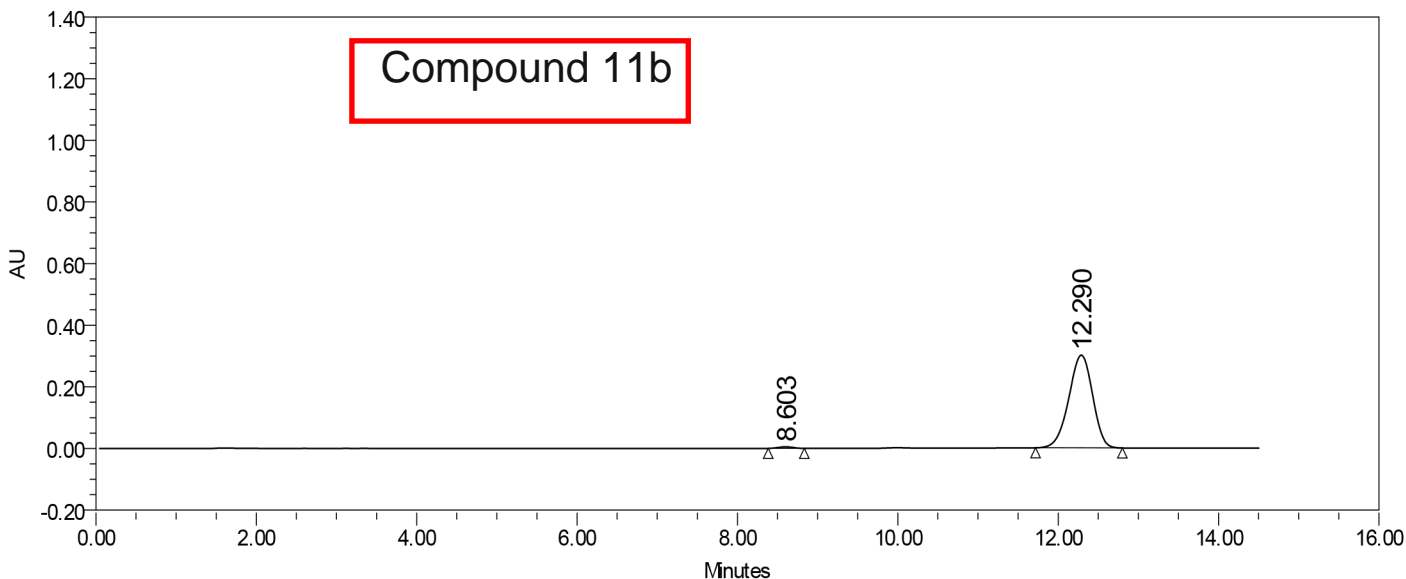

|   | RT     | Area    | % Area | Height |
|---|--------|---------|--------|--------|
| 1 | 8.603  | 62358   | 0.99   | 5028   |
| 2 | 12.290 | 6208543 | 99.01  | 301317 |

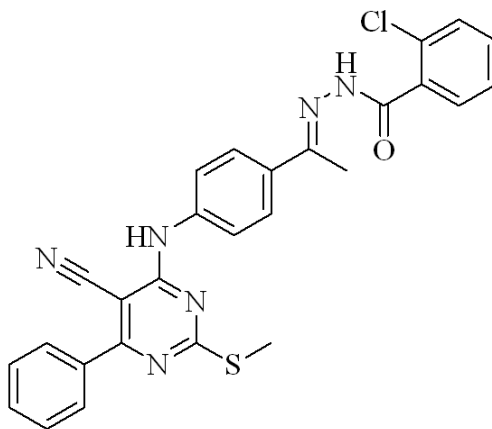

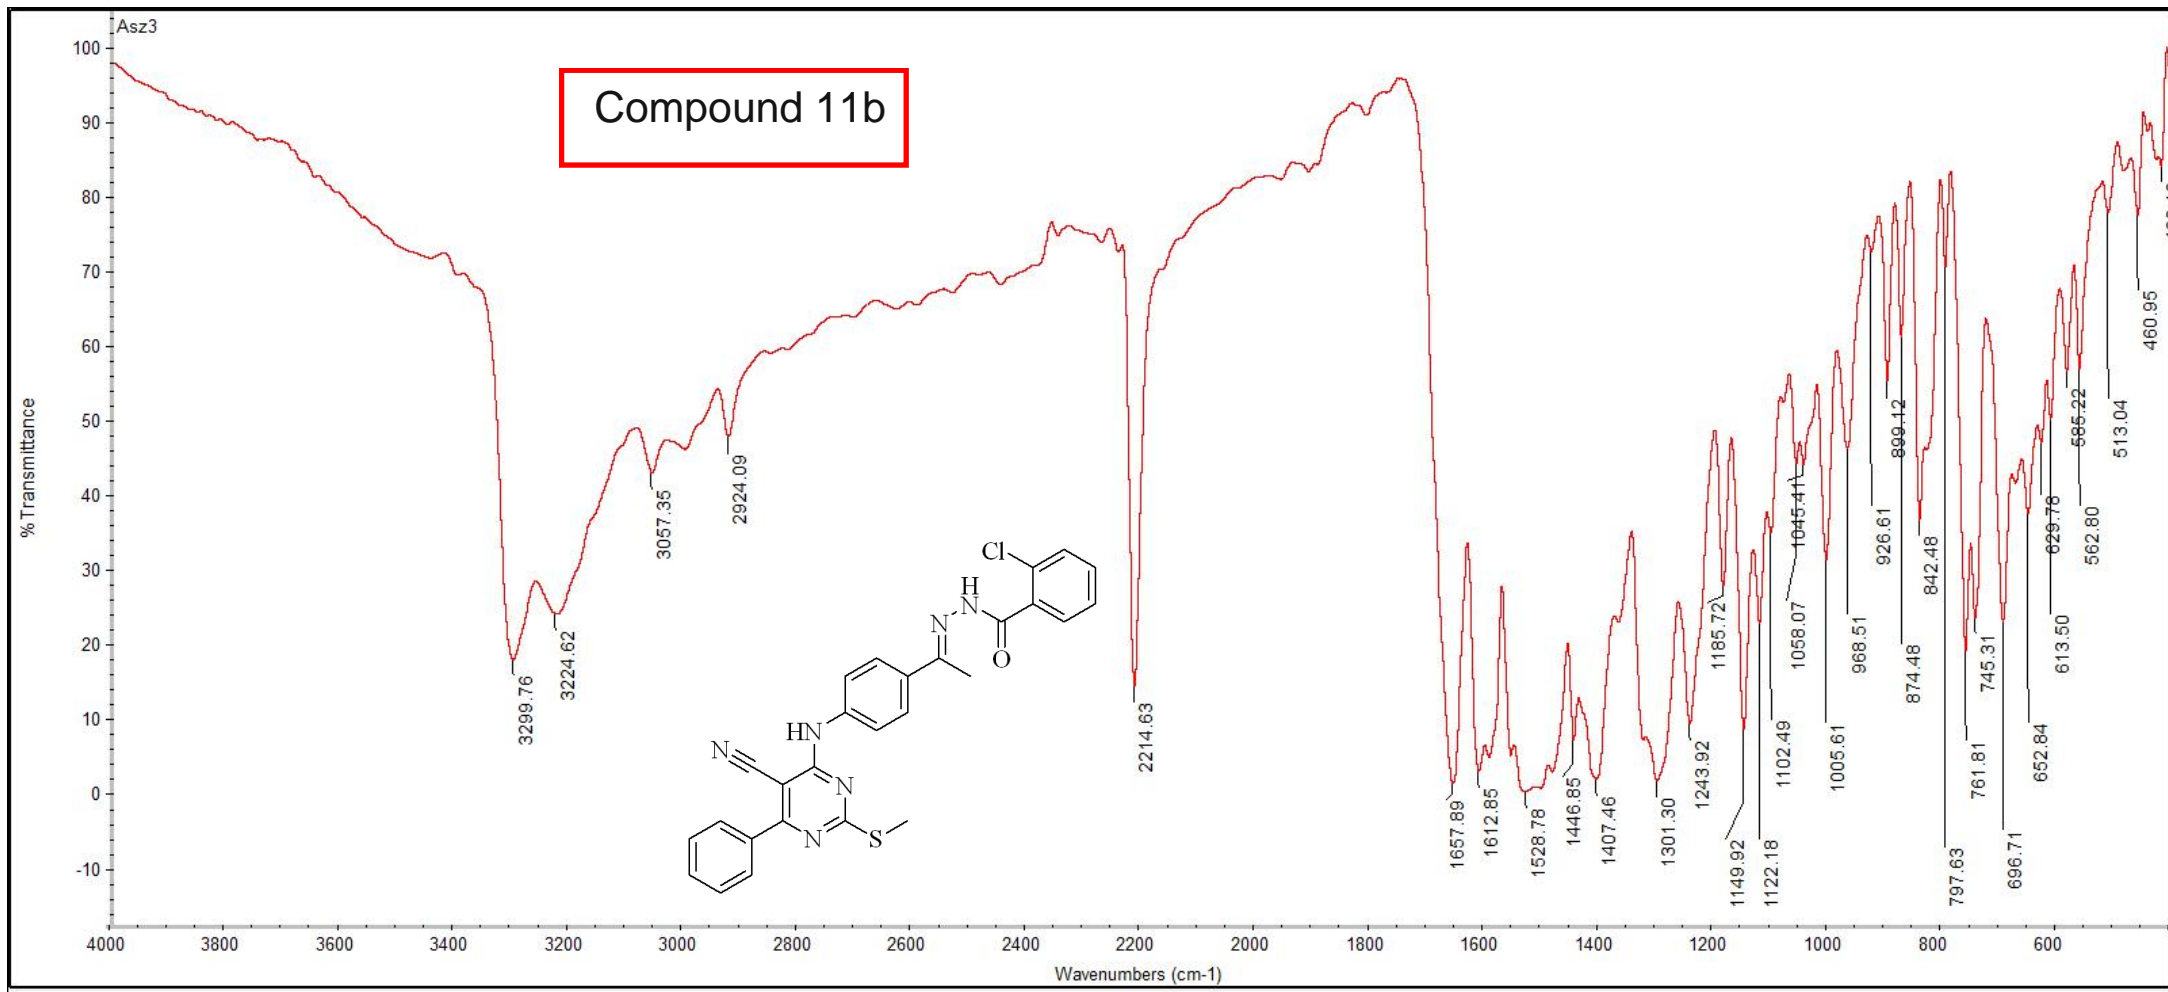



<sup>1</sup>H NMR 11h

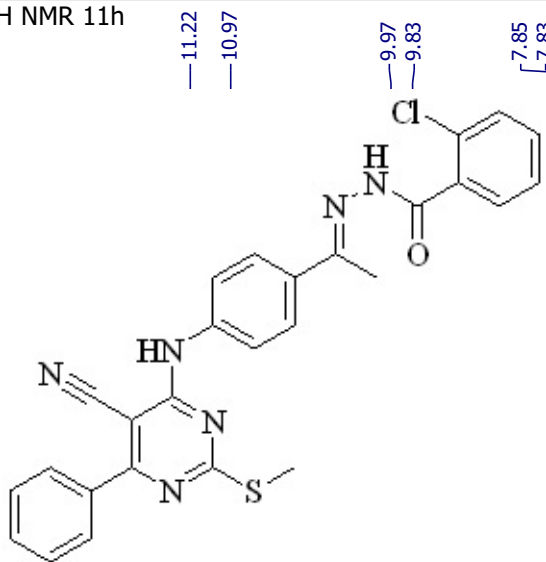

Compound 11b

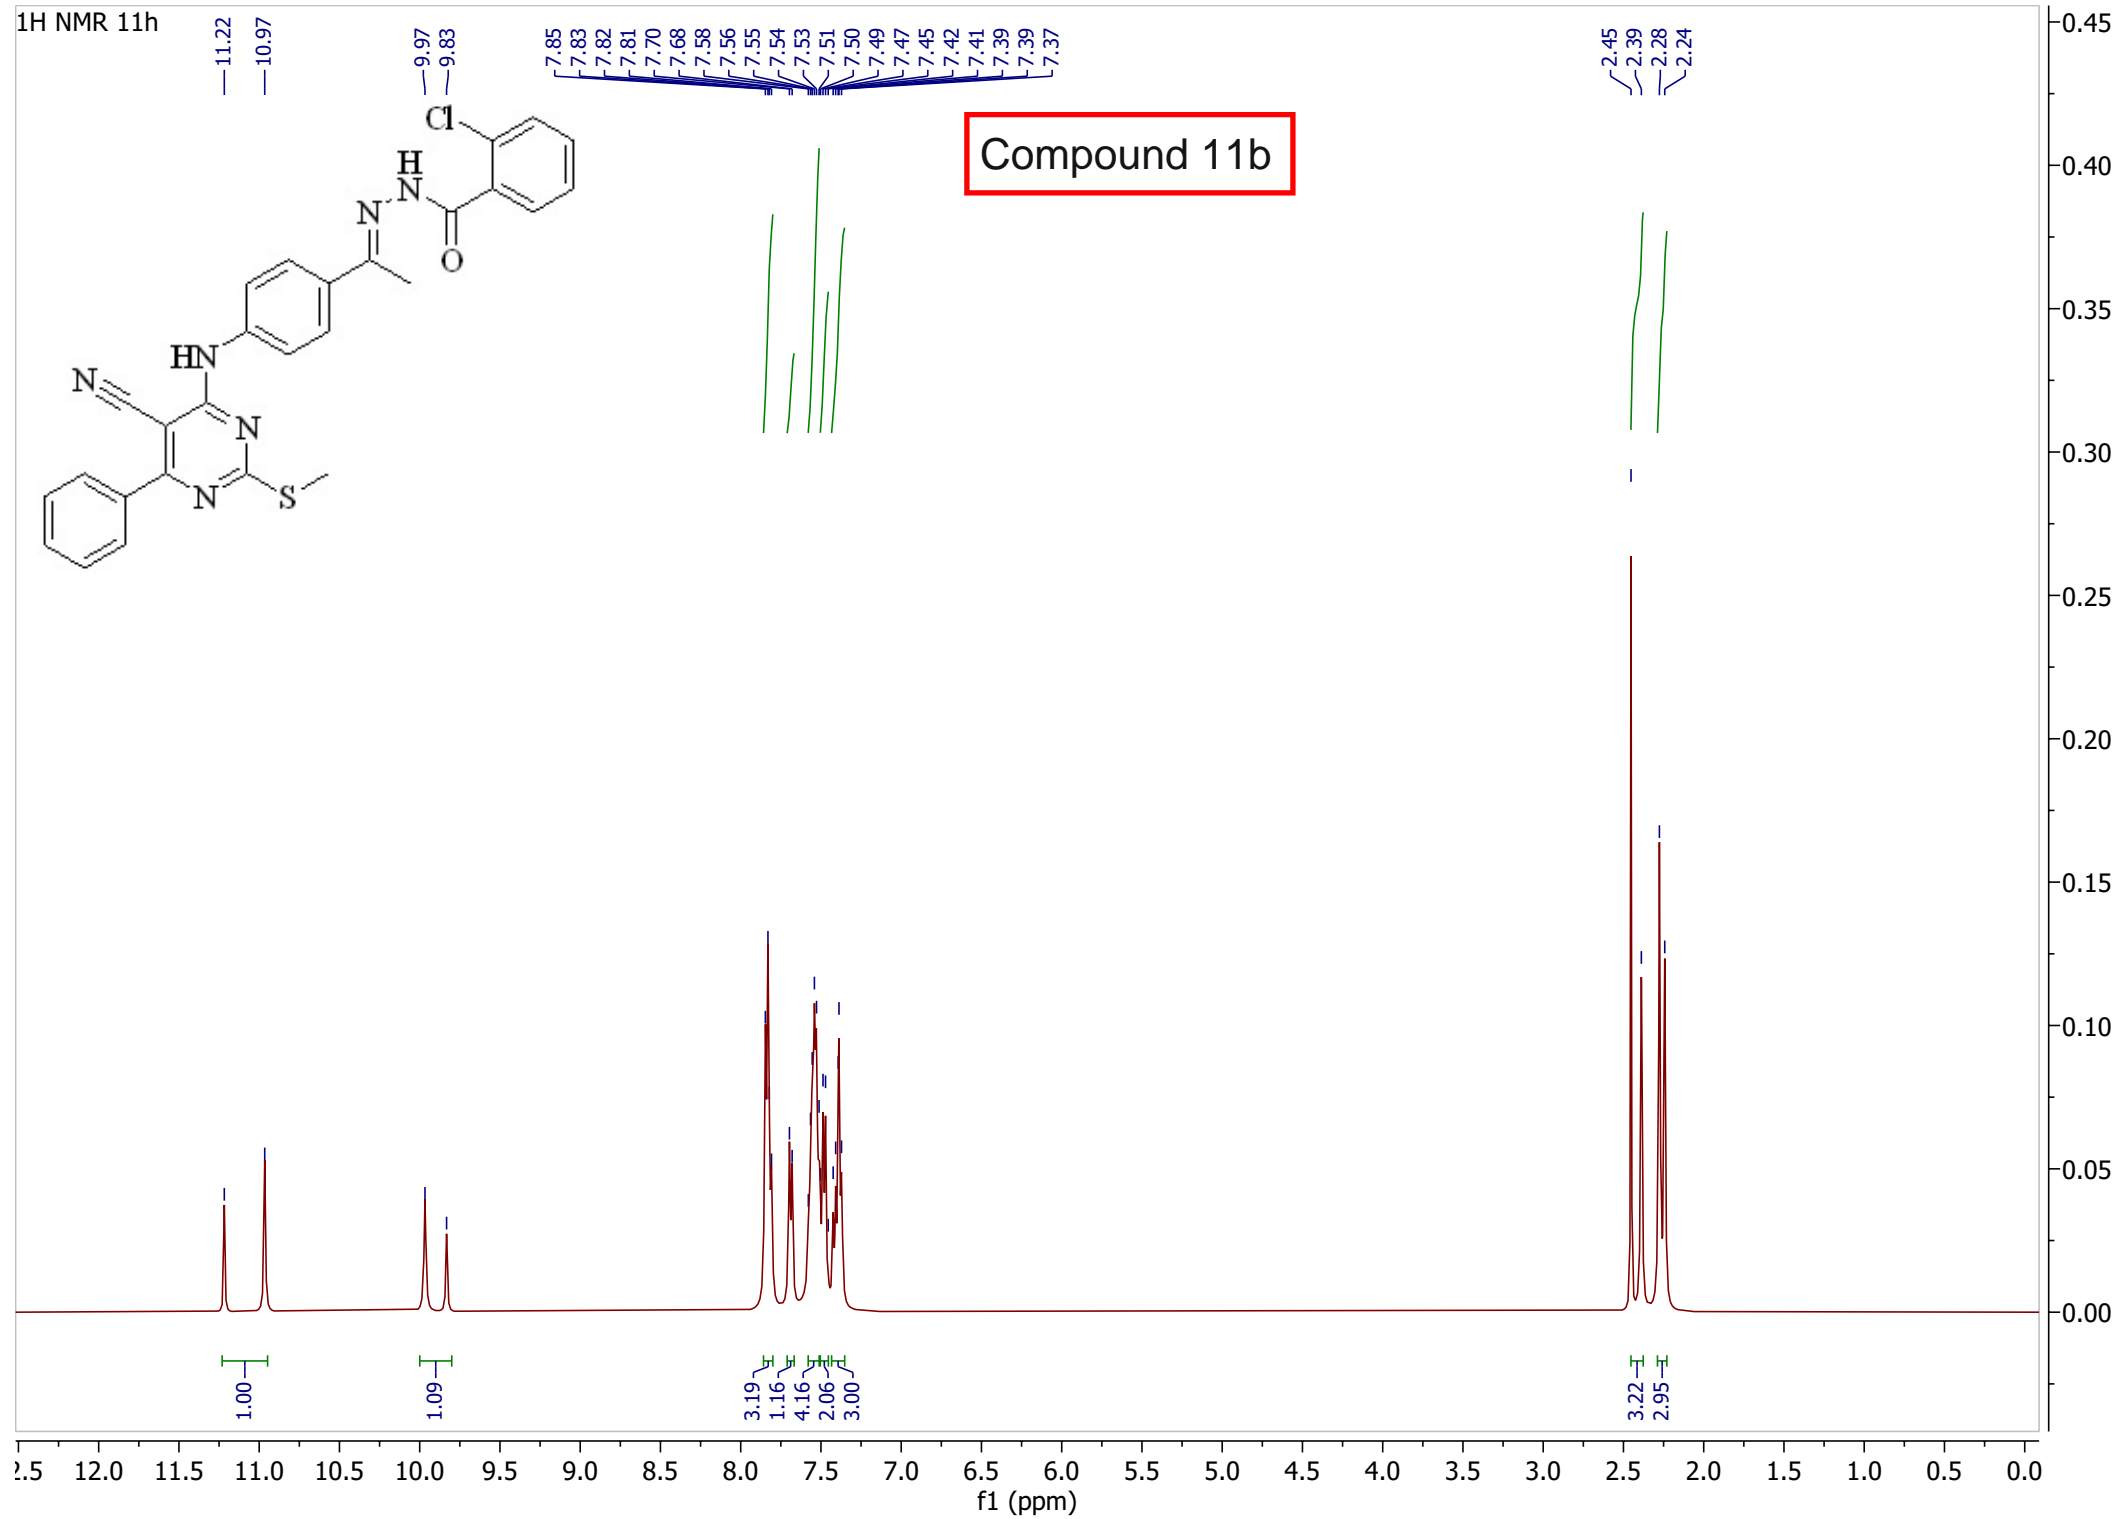

<sup>1</sup>H NMR 11h

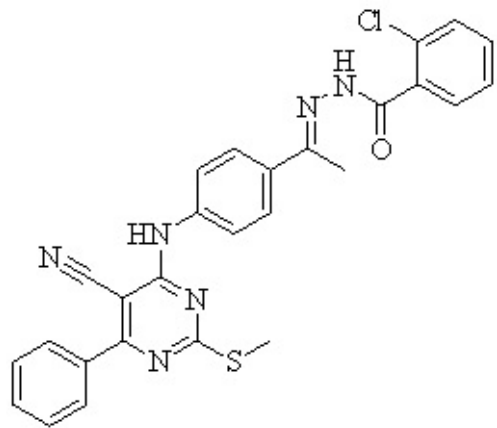

Compound 11b

— 2.45  
— 2.39  
~ 2.28  
~ 2.24

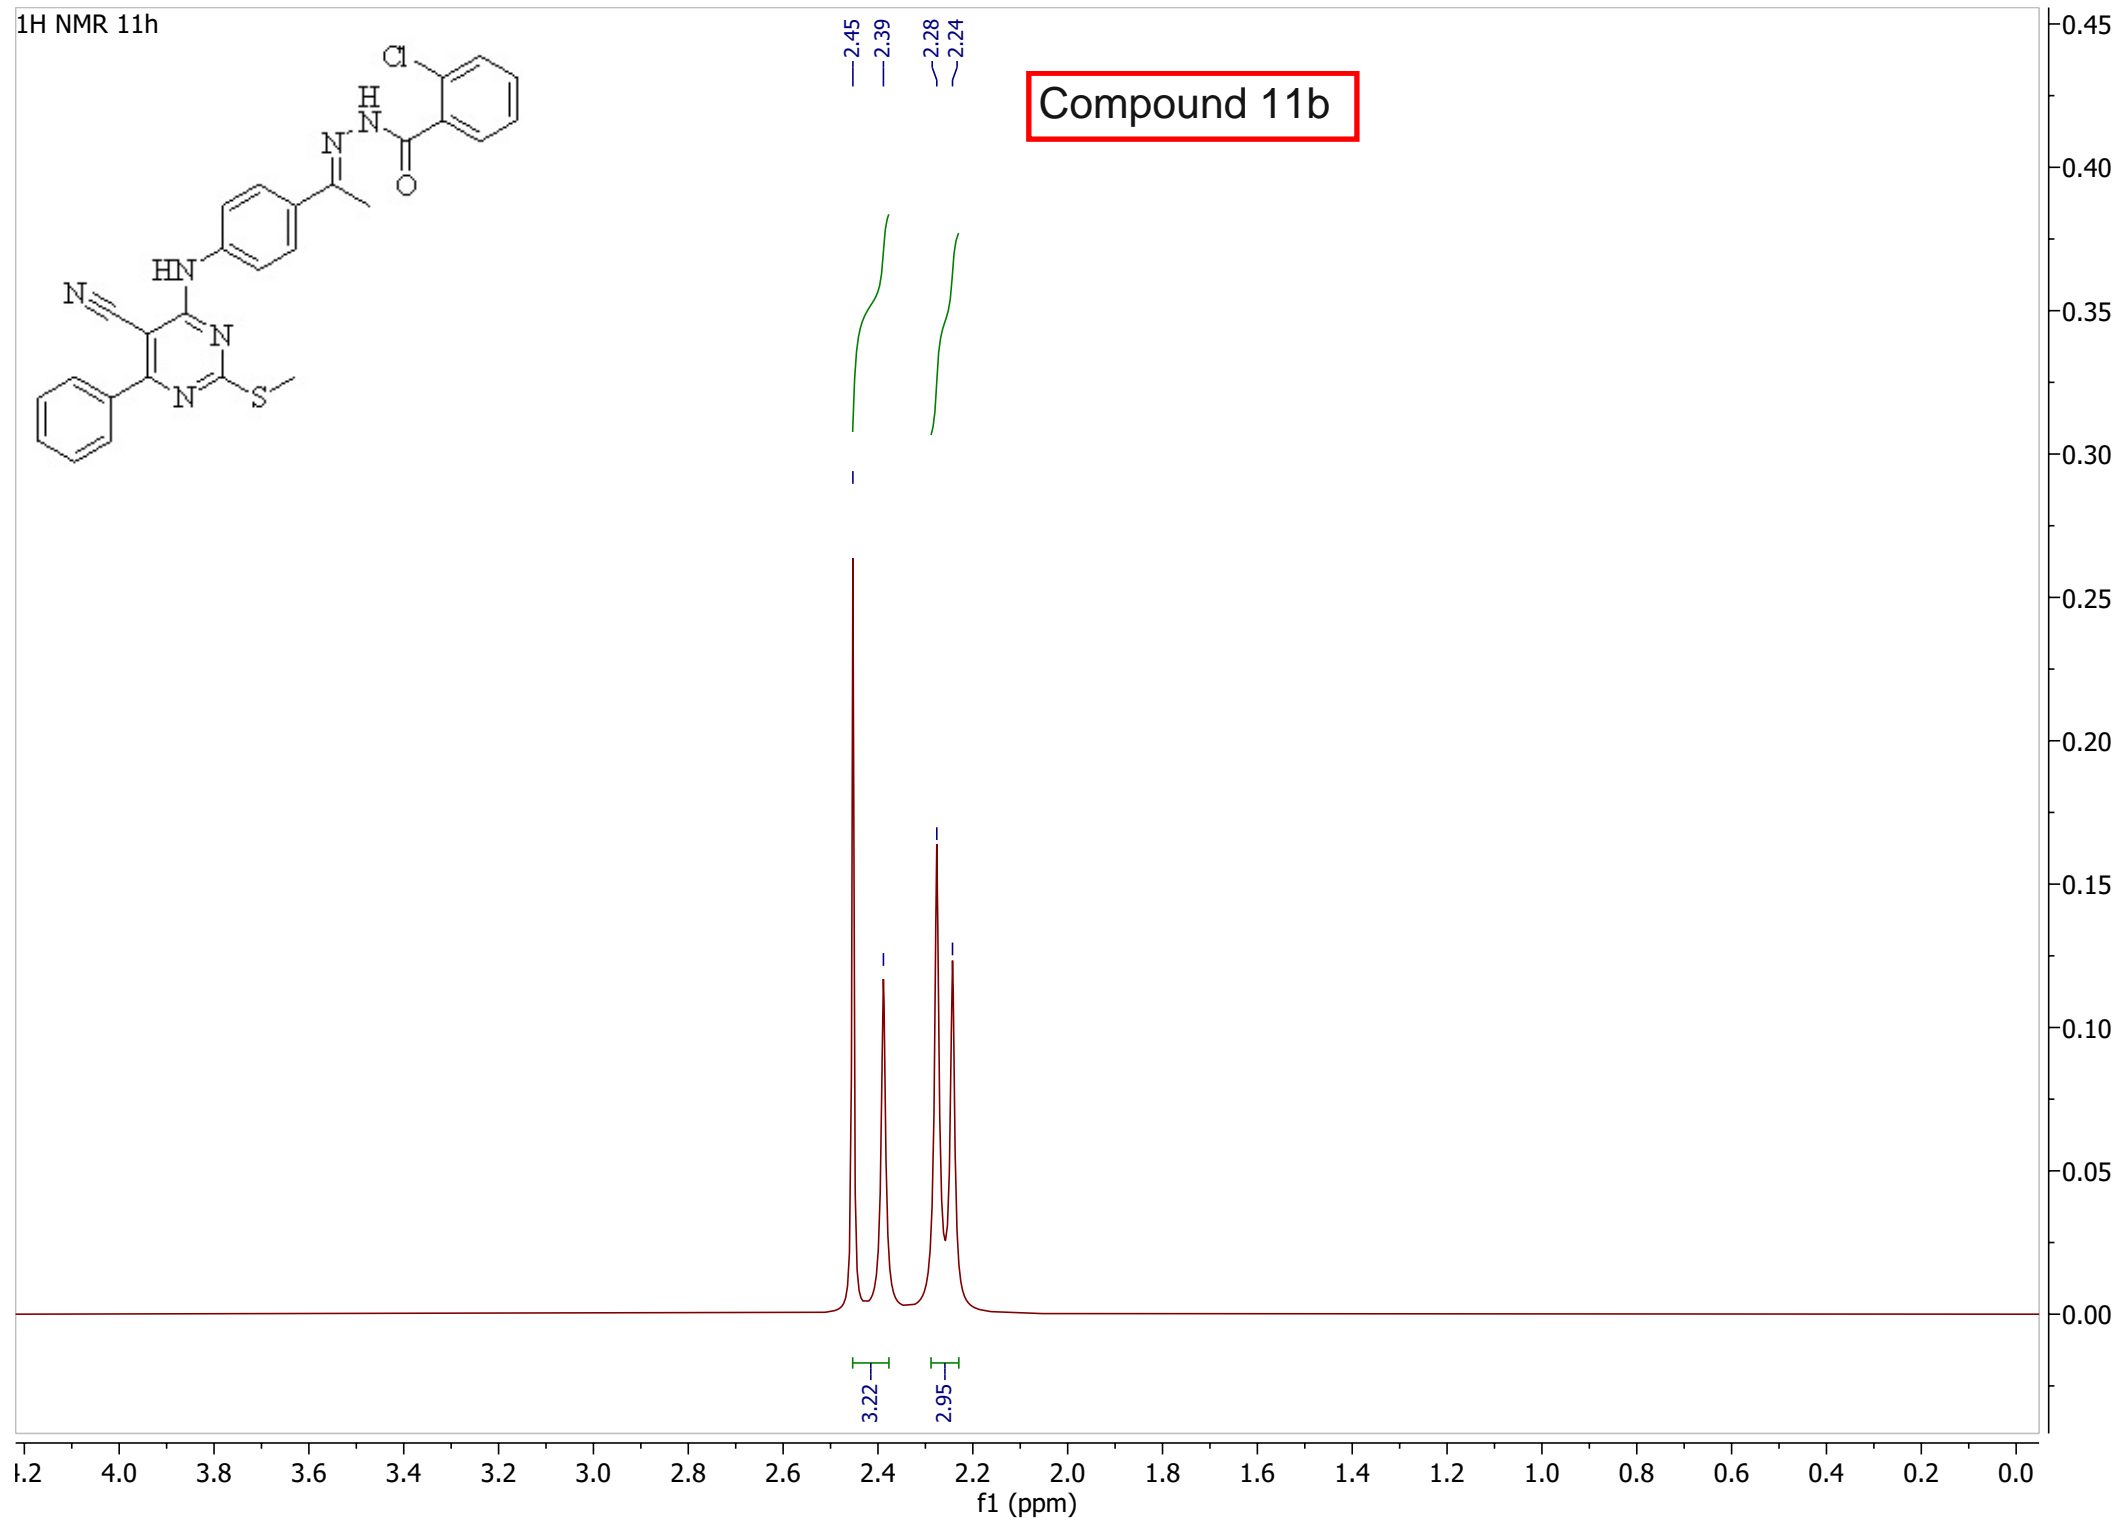

<sup>1</sup>H NMR 11b

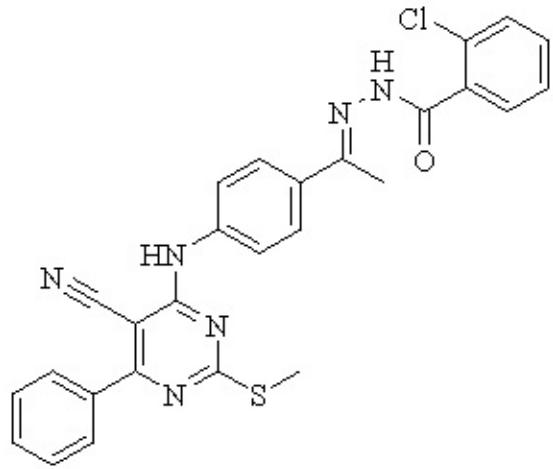

Compound 11b

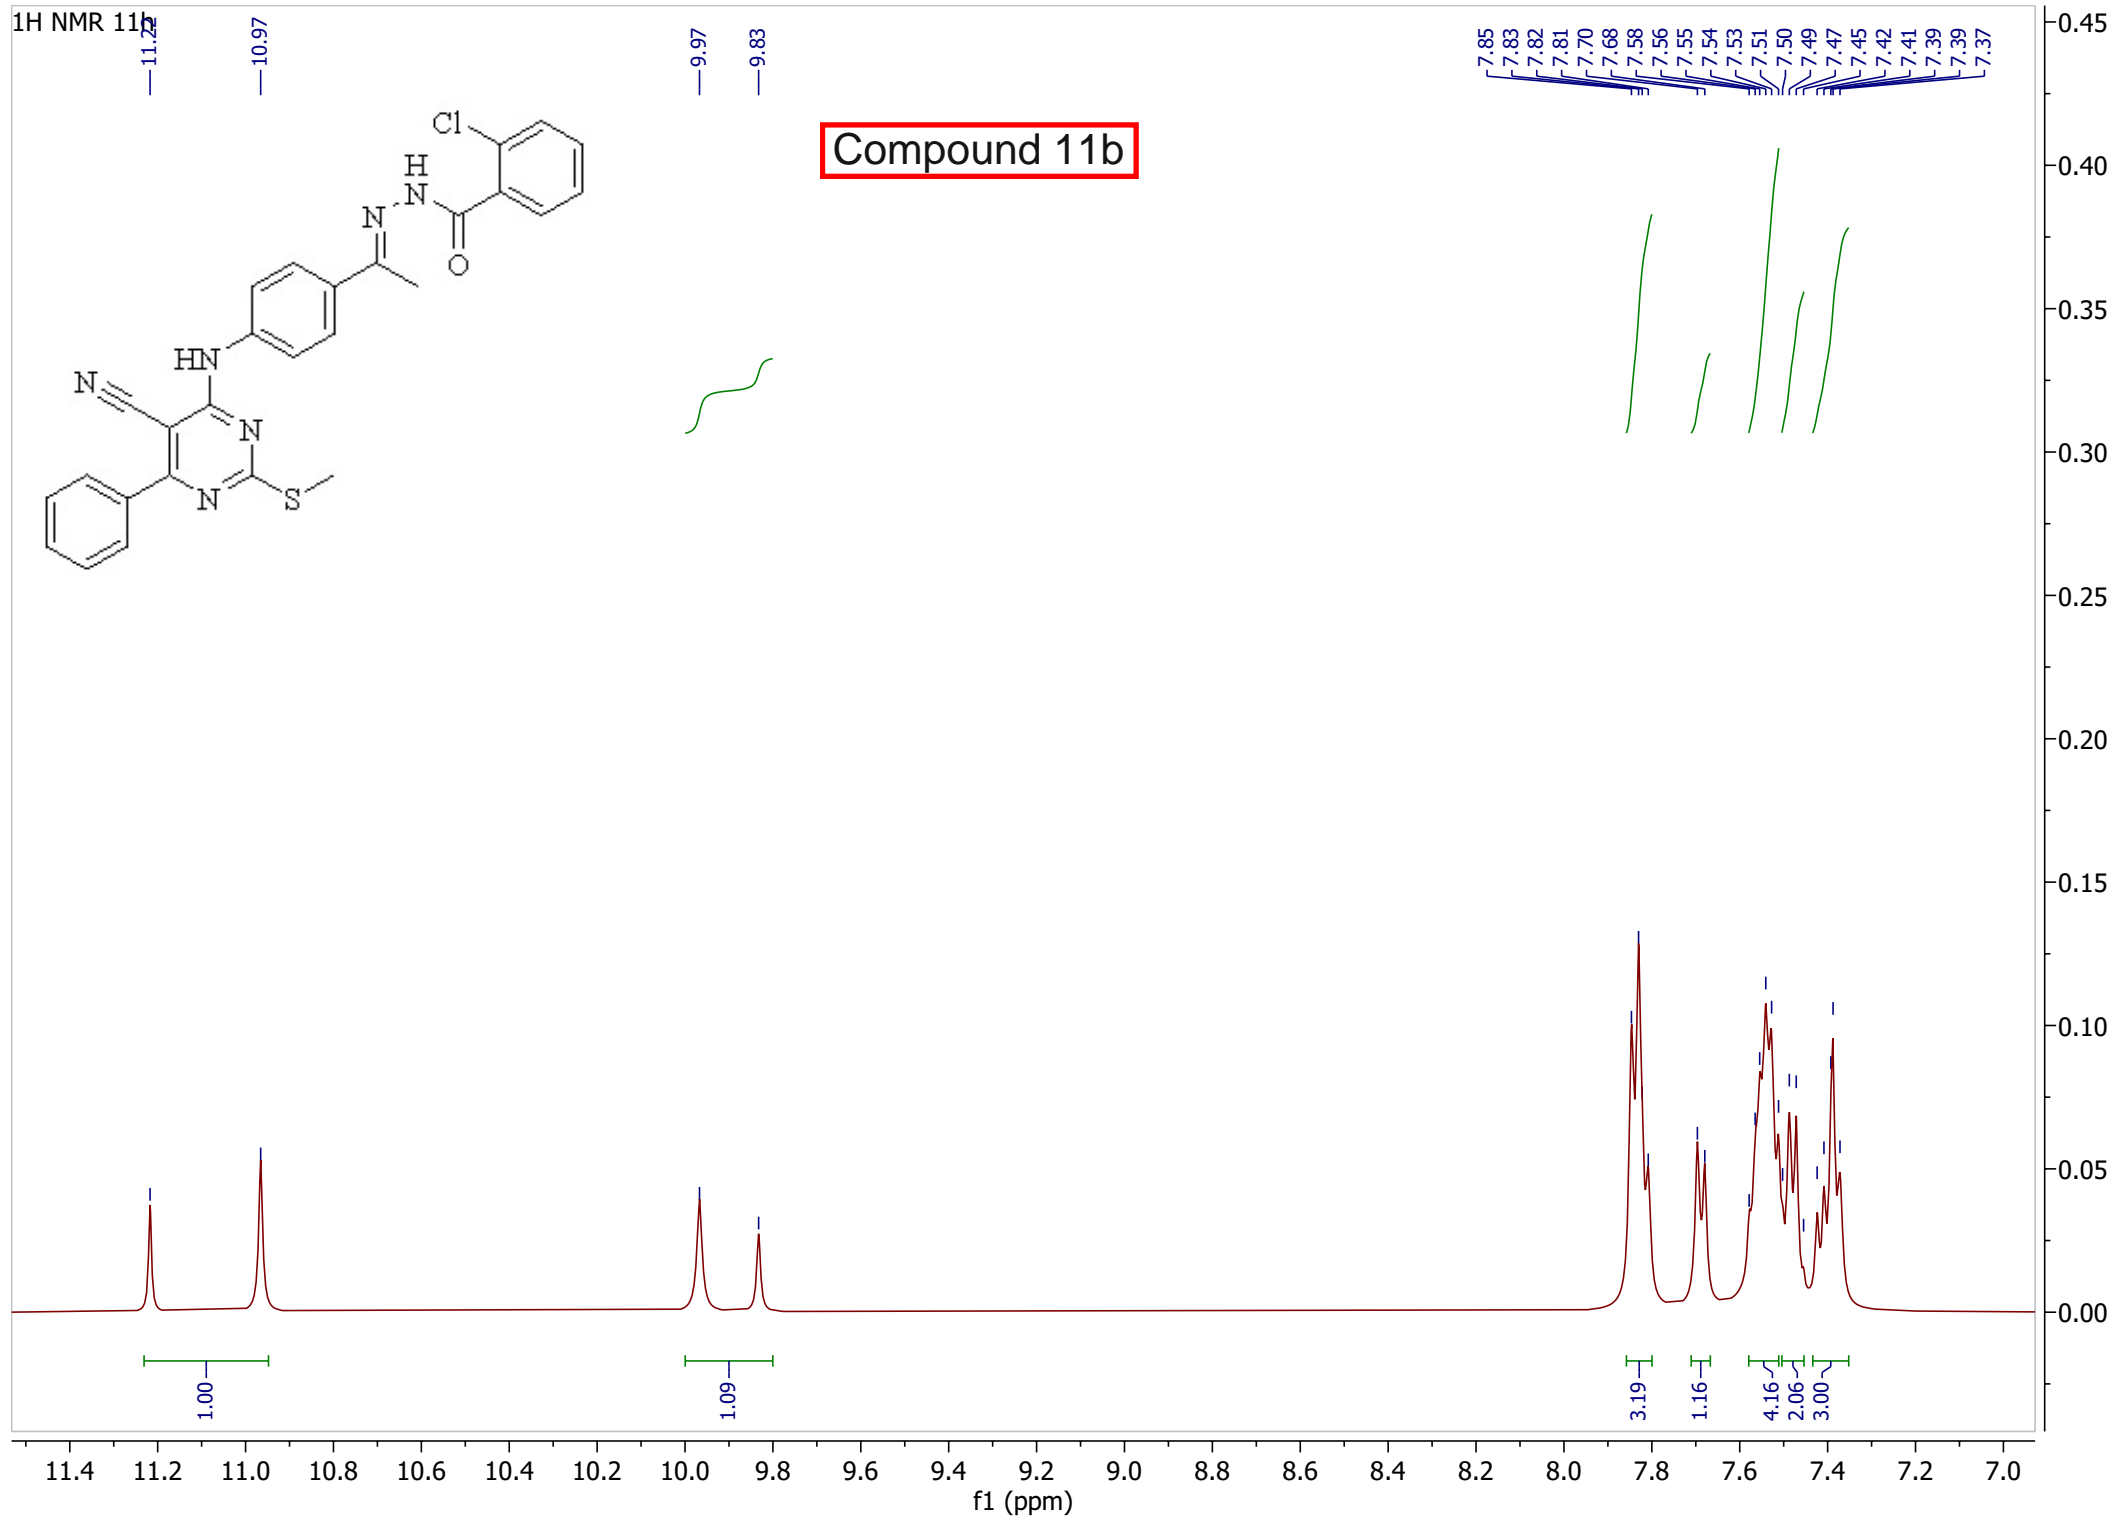

<sup>1</sup>H NMR 11h

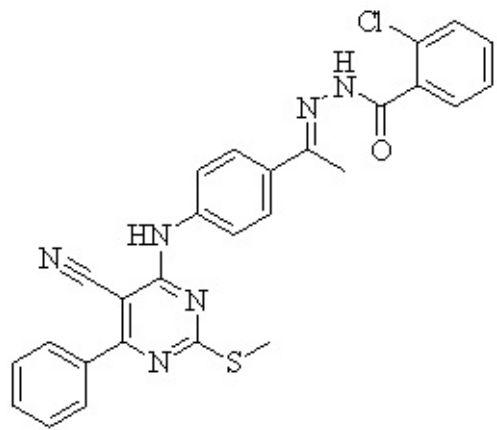

Compound 11b

174.73  
170.13  
168.69  
163.53  
160.40  
154.52  
148.58  
139.59  
137.29  
136.38  
134.50  
131.77  
130.11  
129.28  
129.10  
127.68  
127.12  
126.40  
123.37  
116.54

85.46

14.96  
14.15

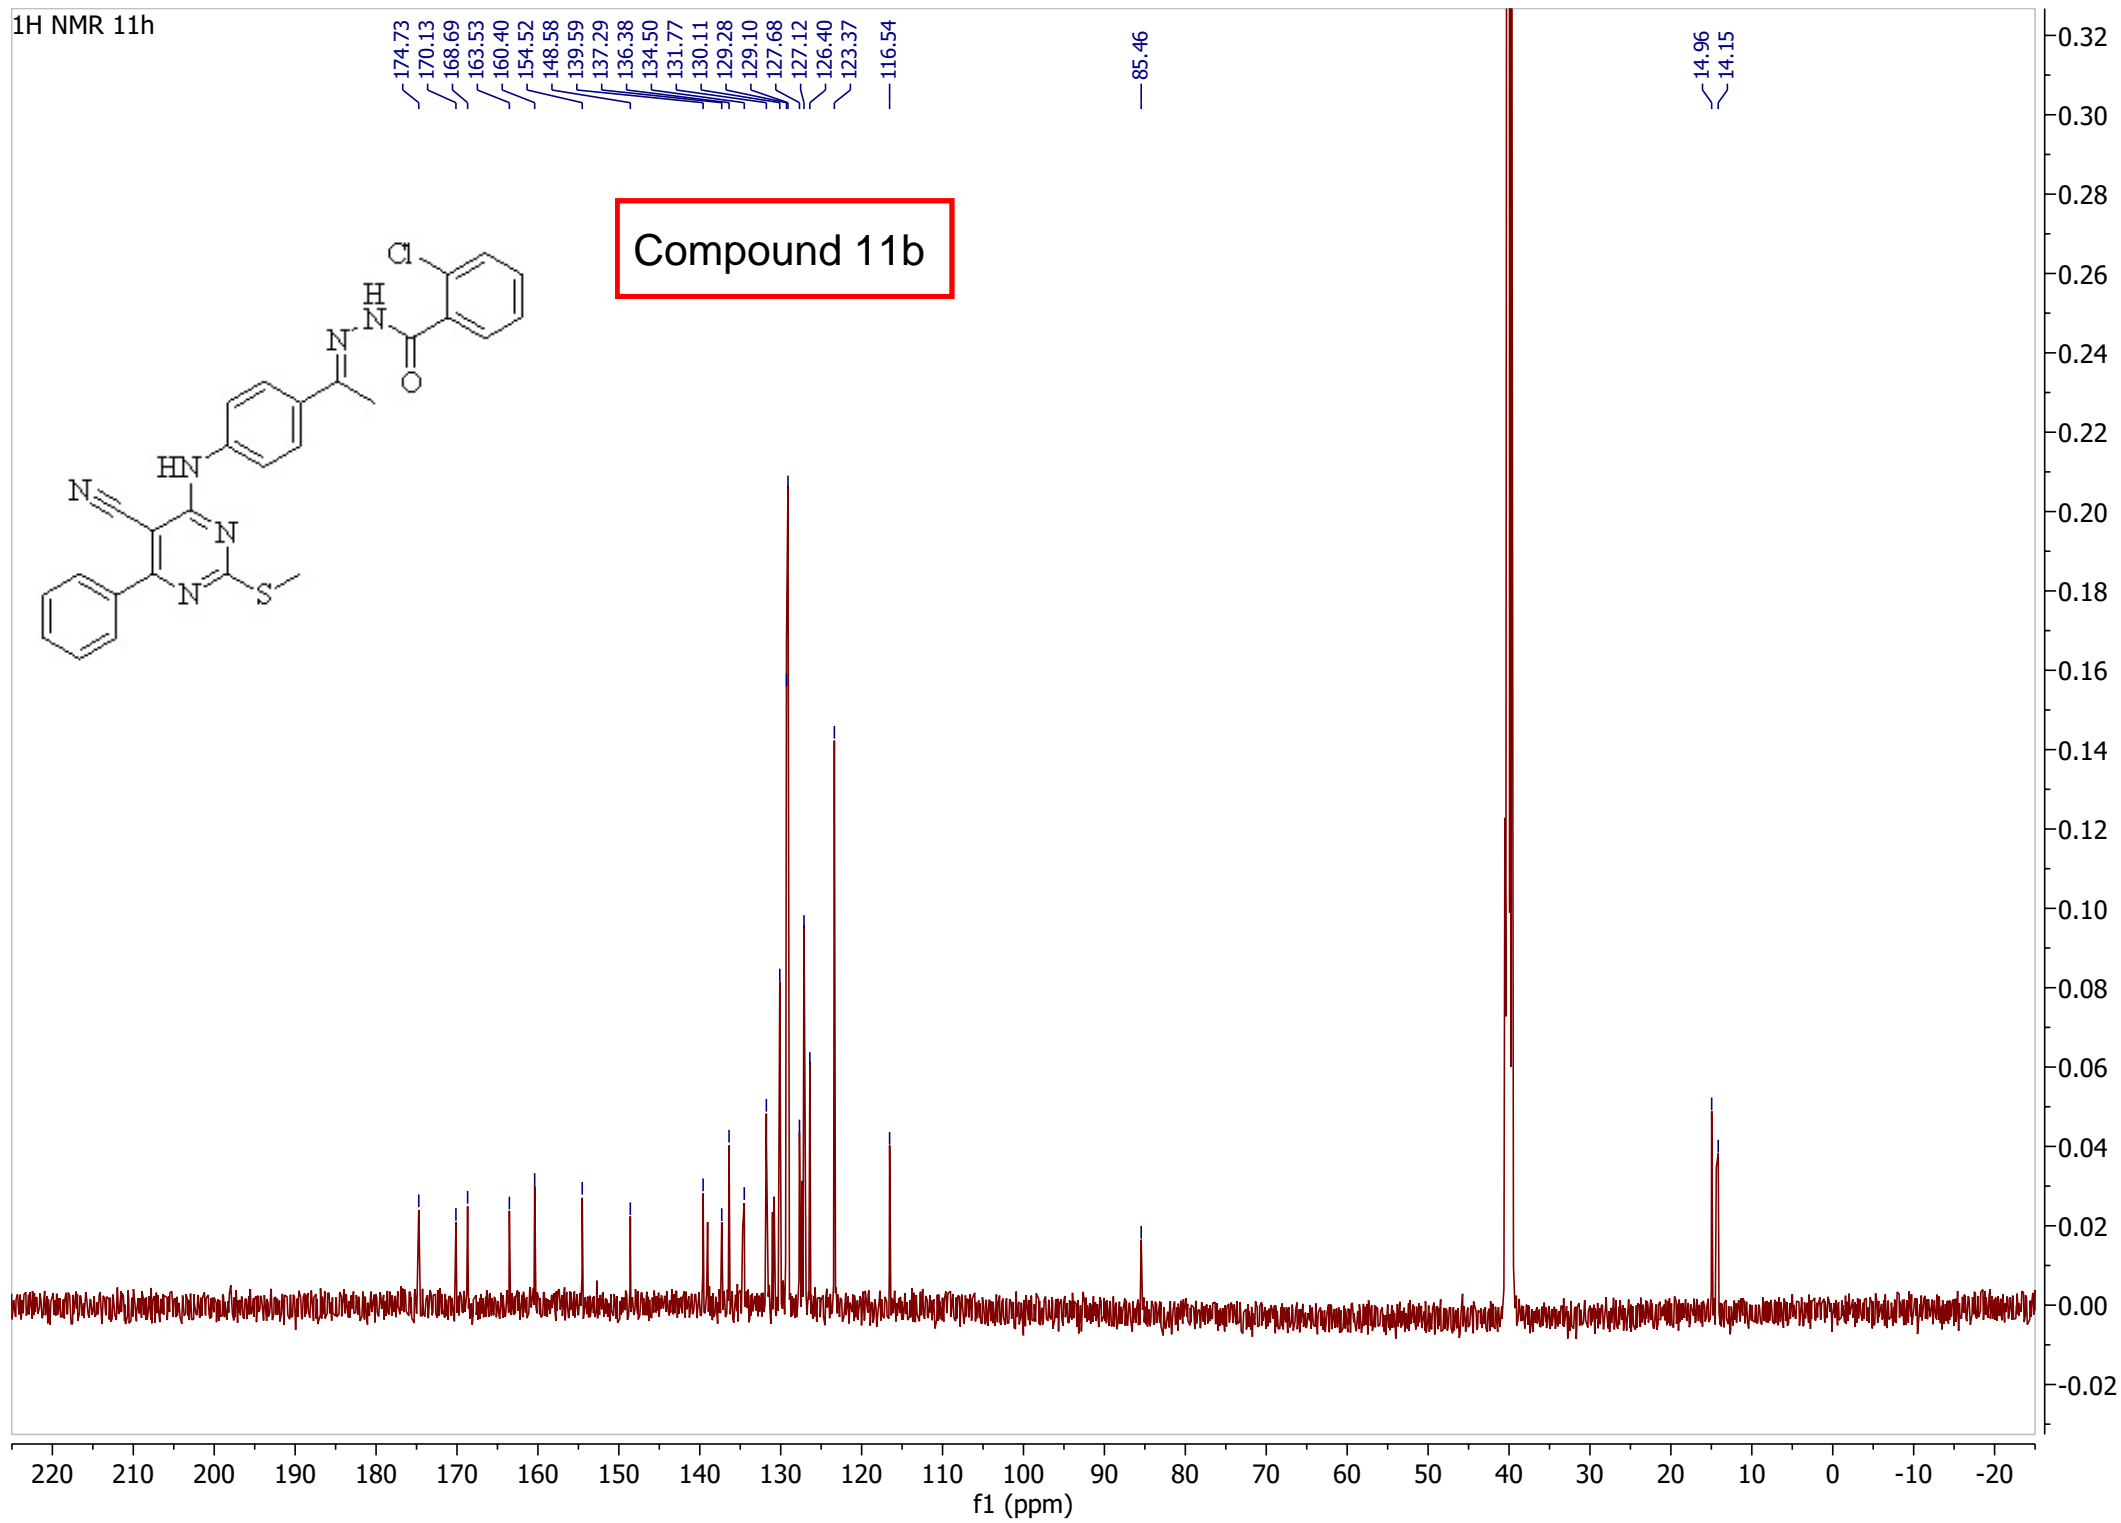

<sup>1</sup>H NMR 11b

Compound 11b

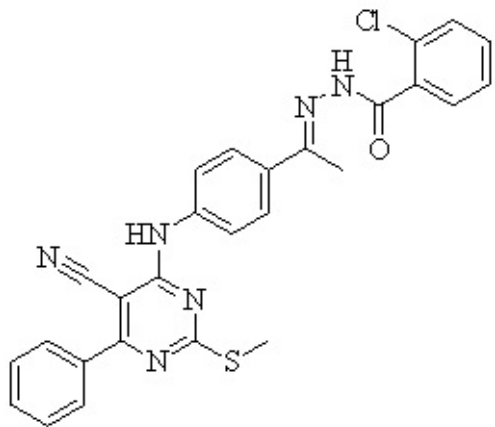

85.46

14.96  
14.15

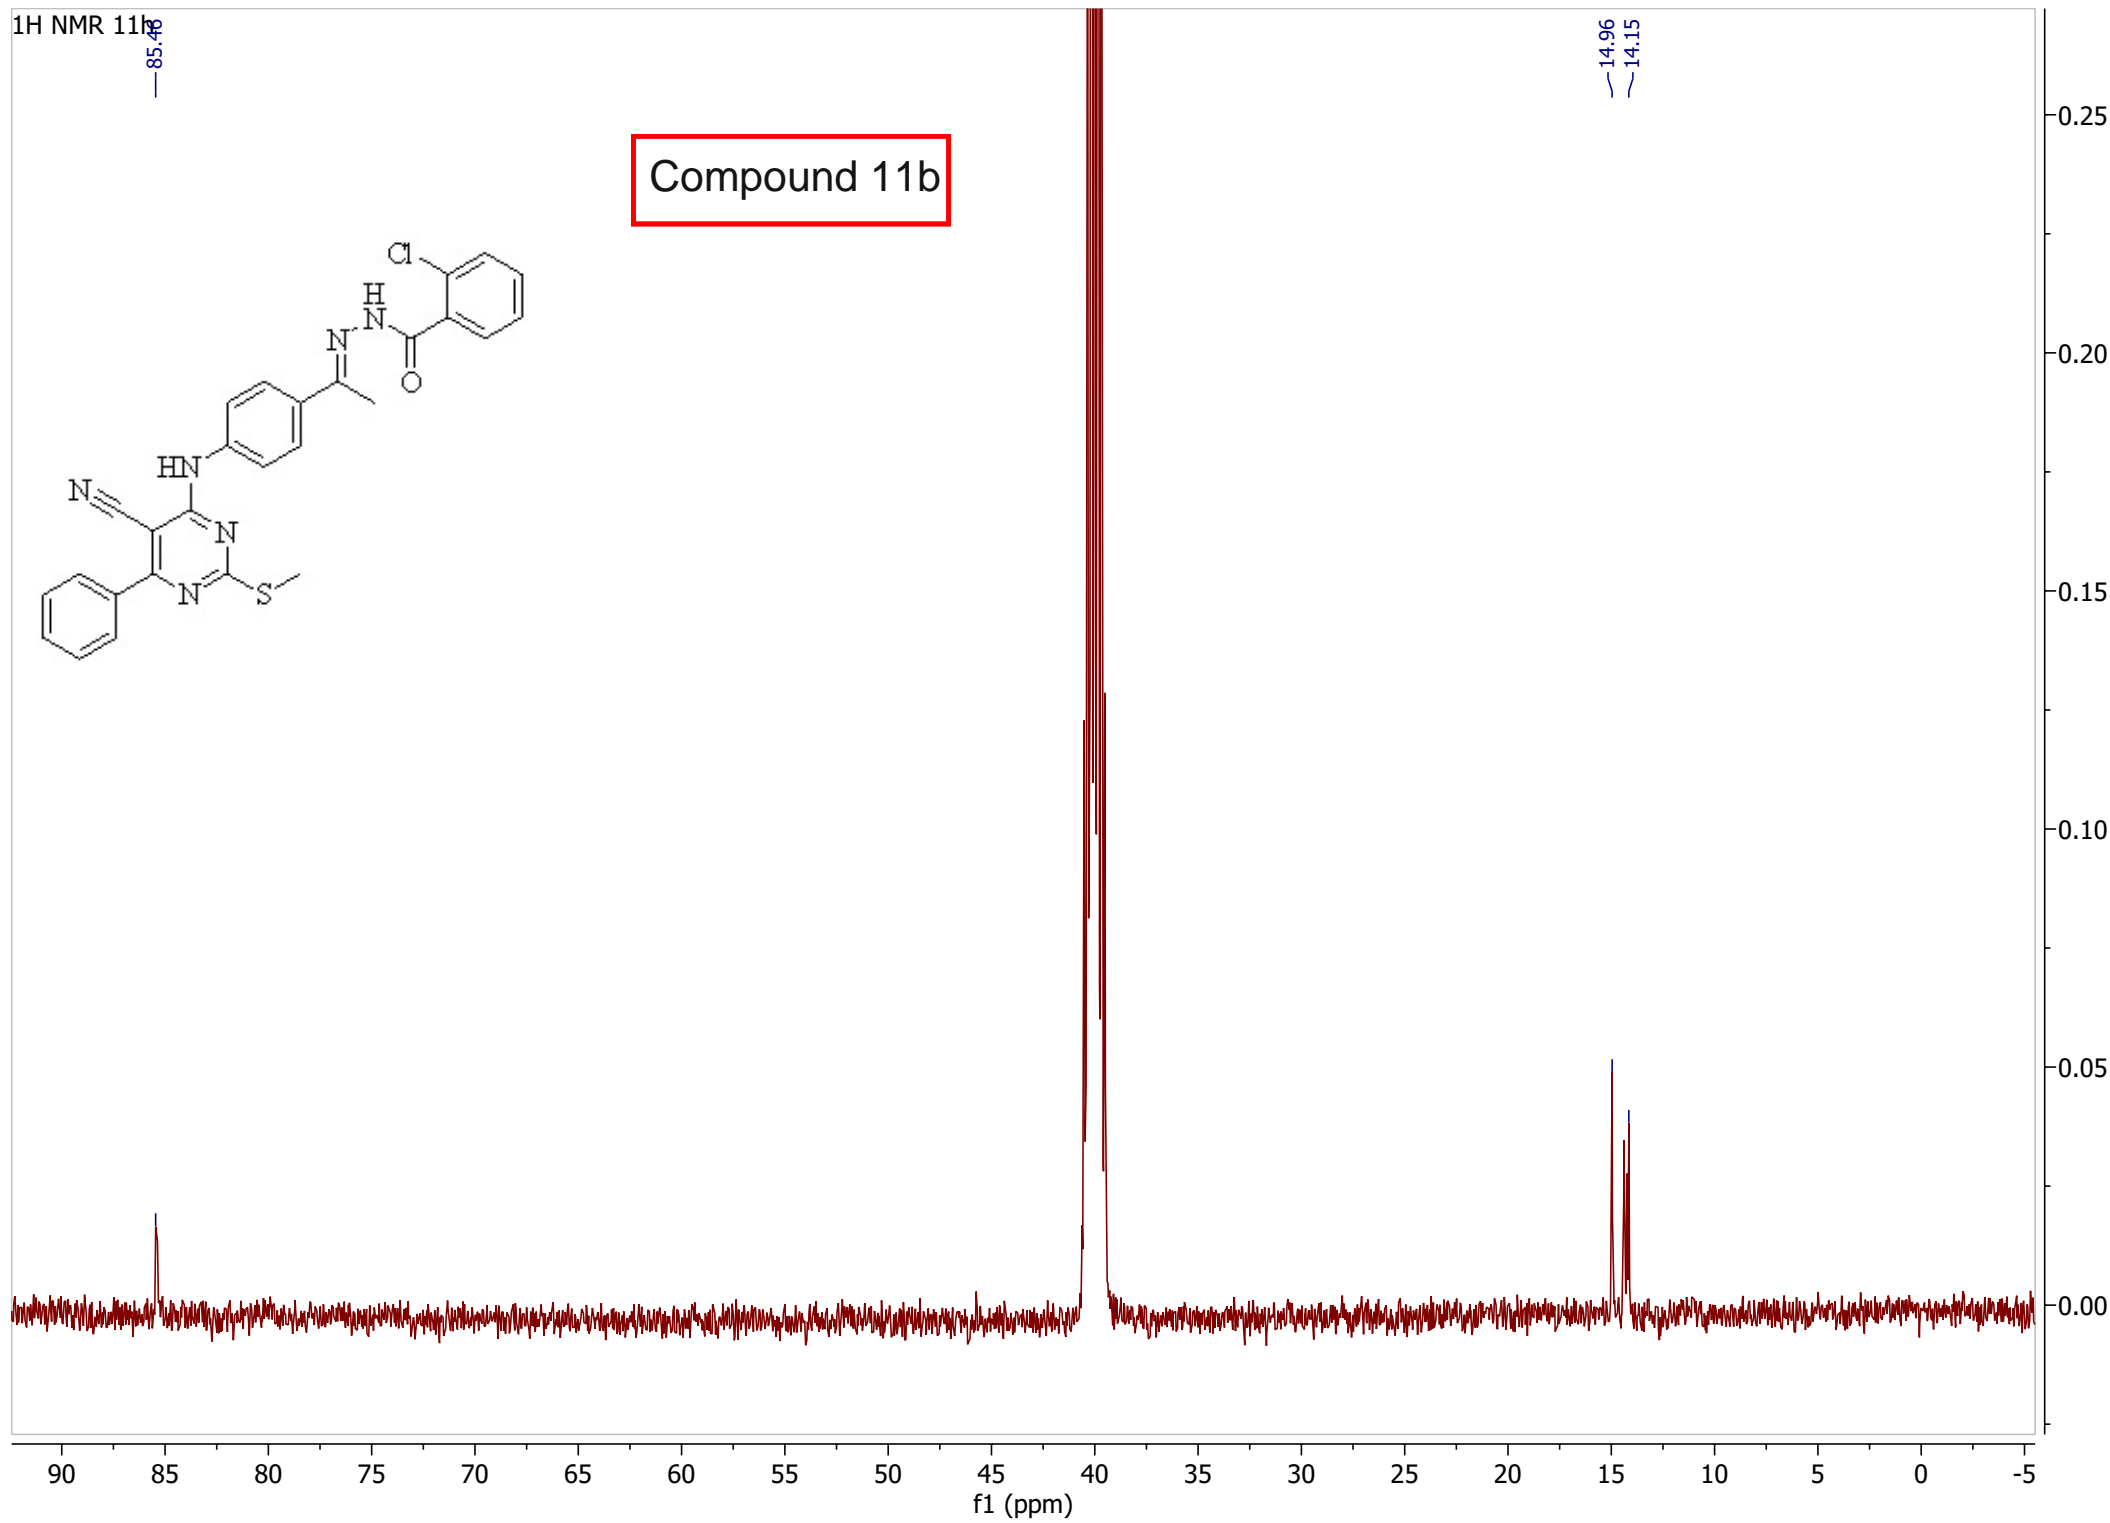

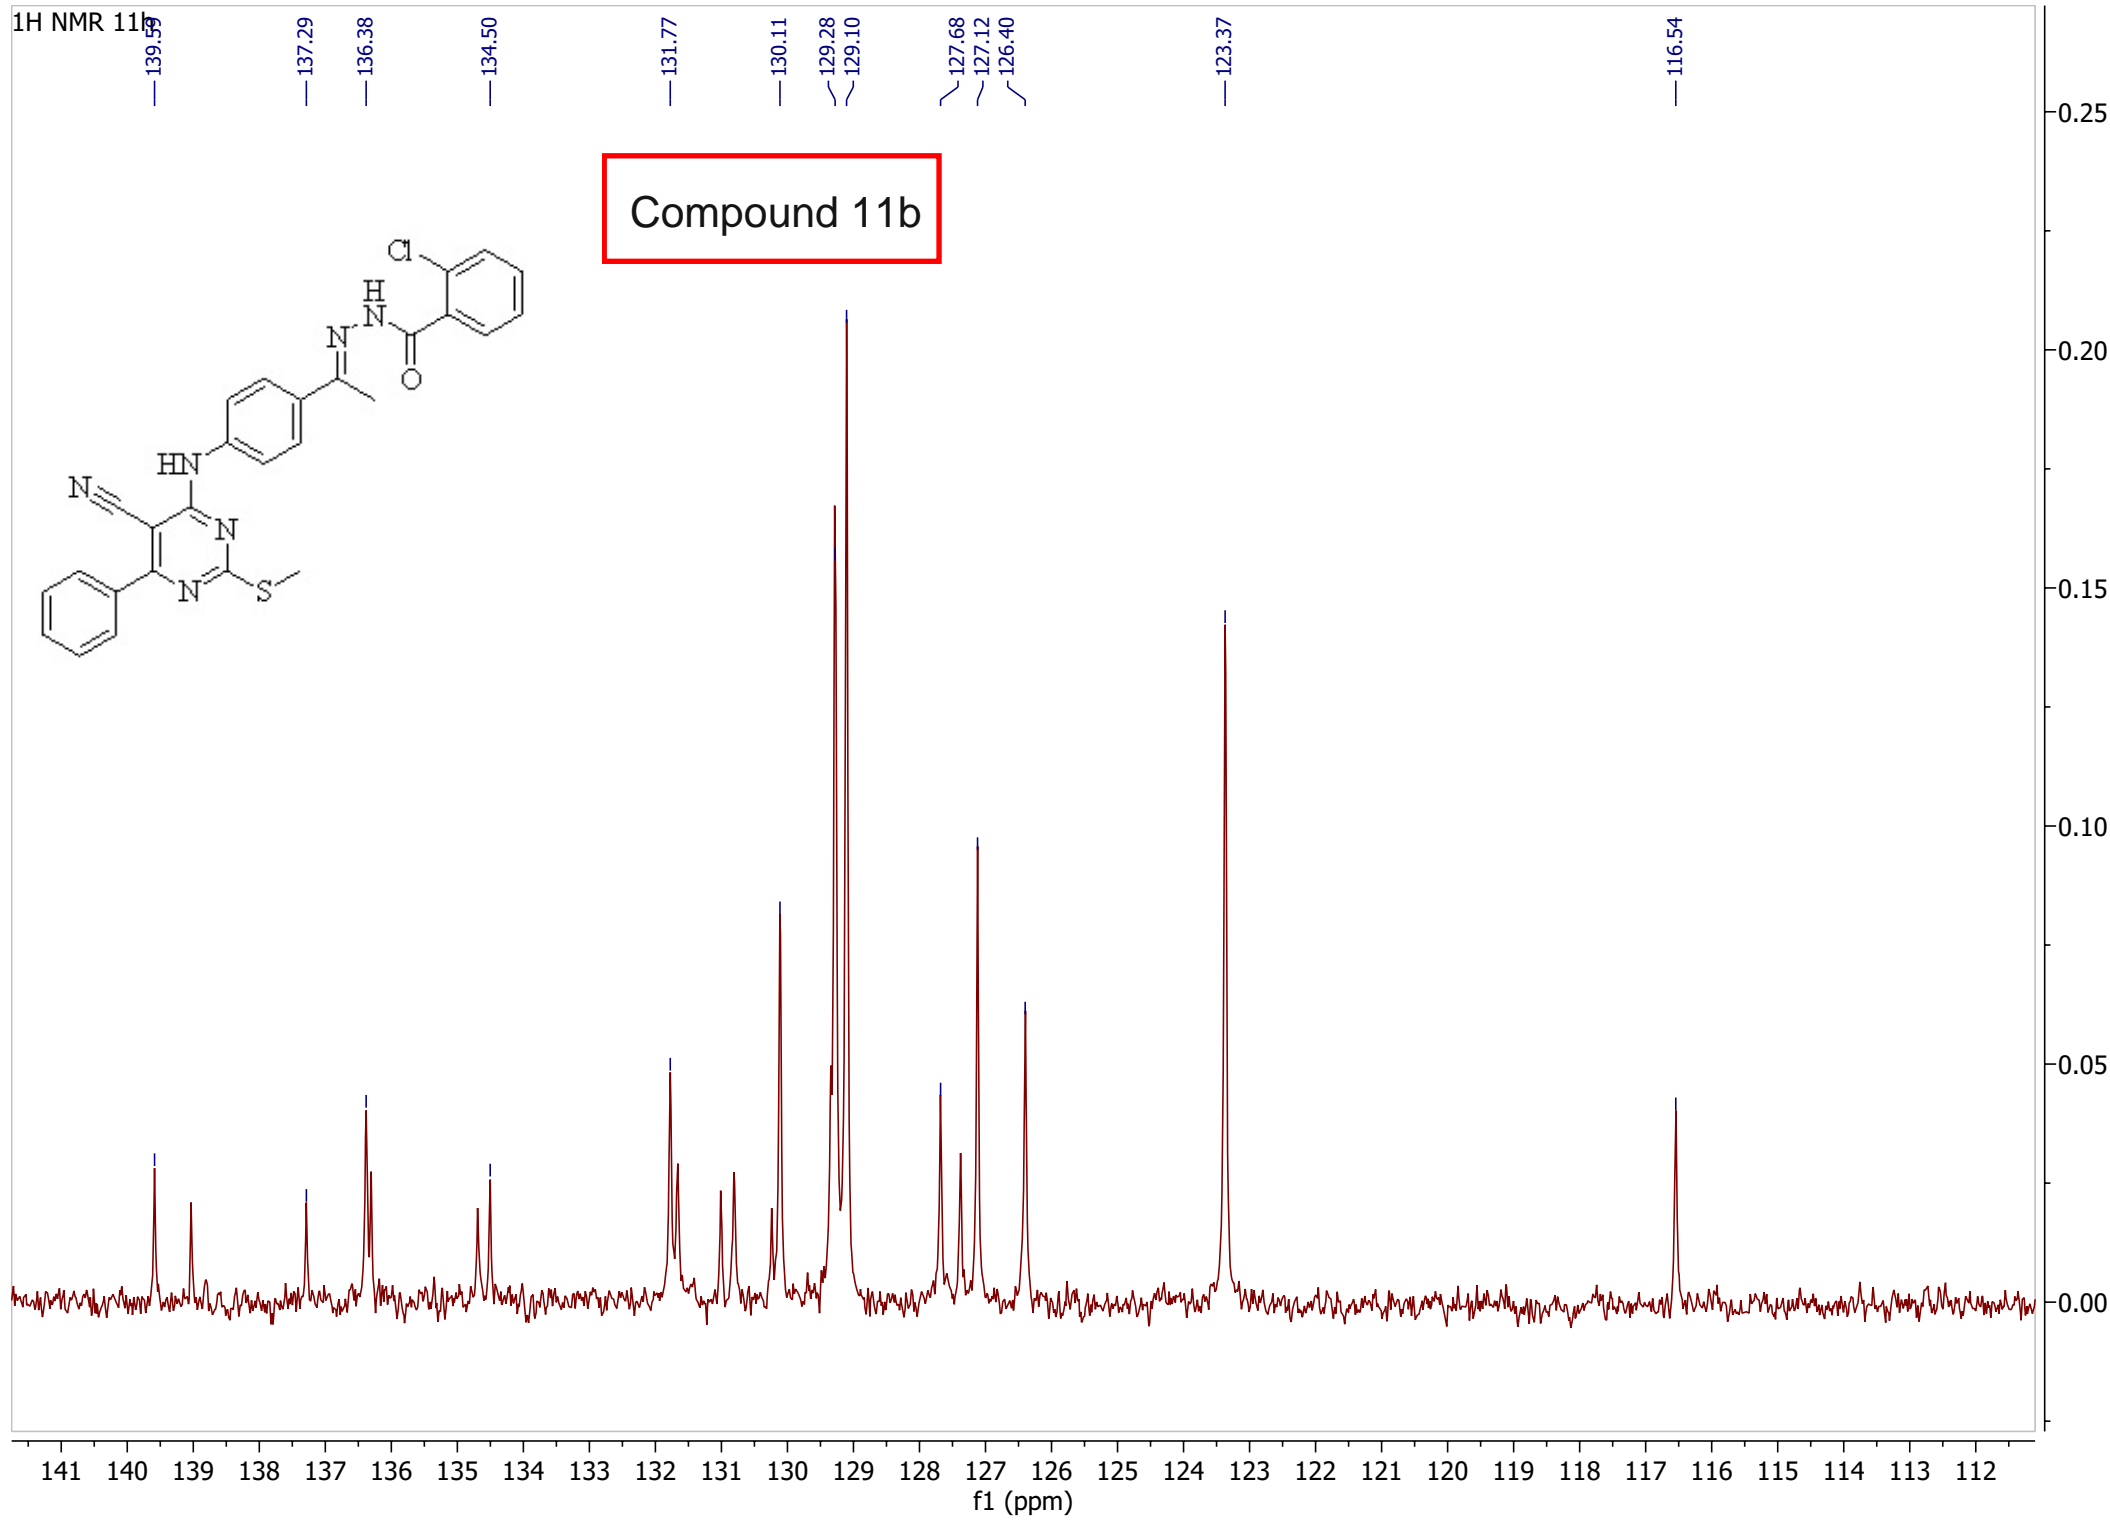

1H NMR 11h

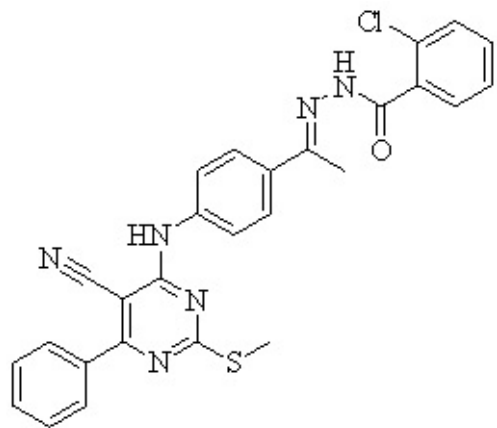

Compound 11b

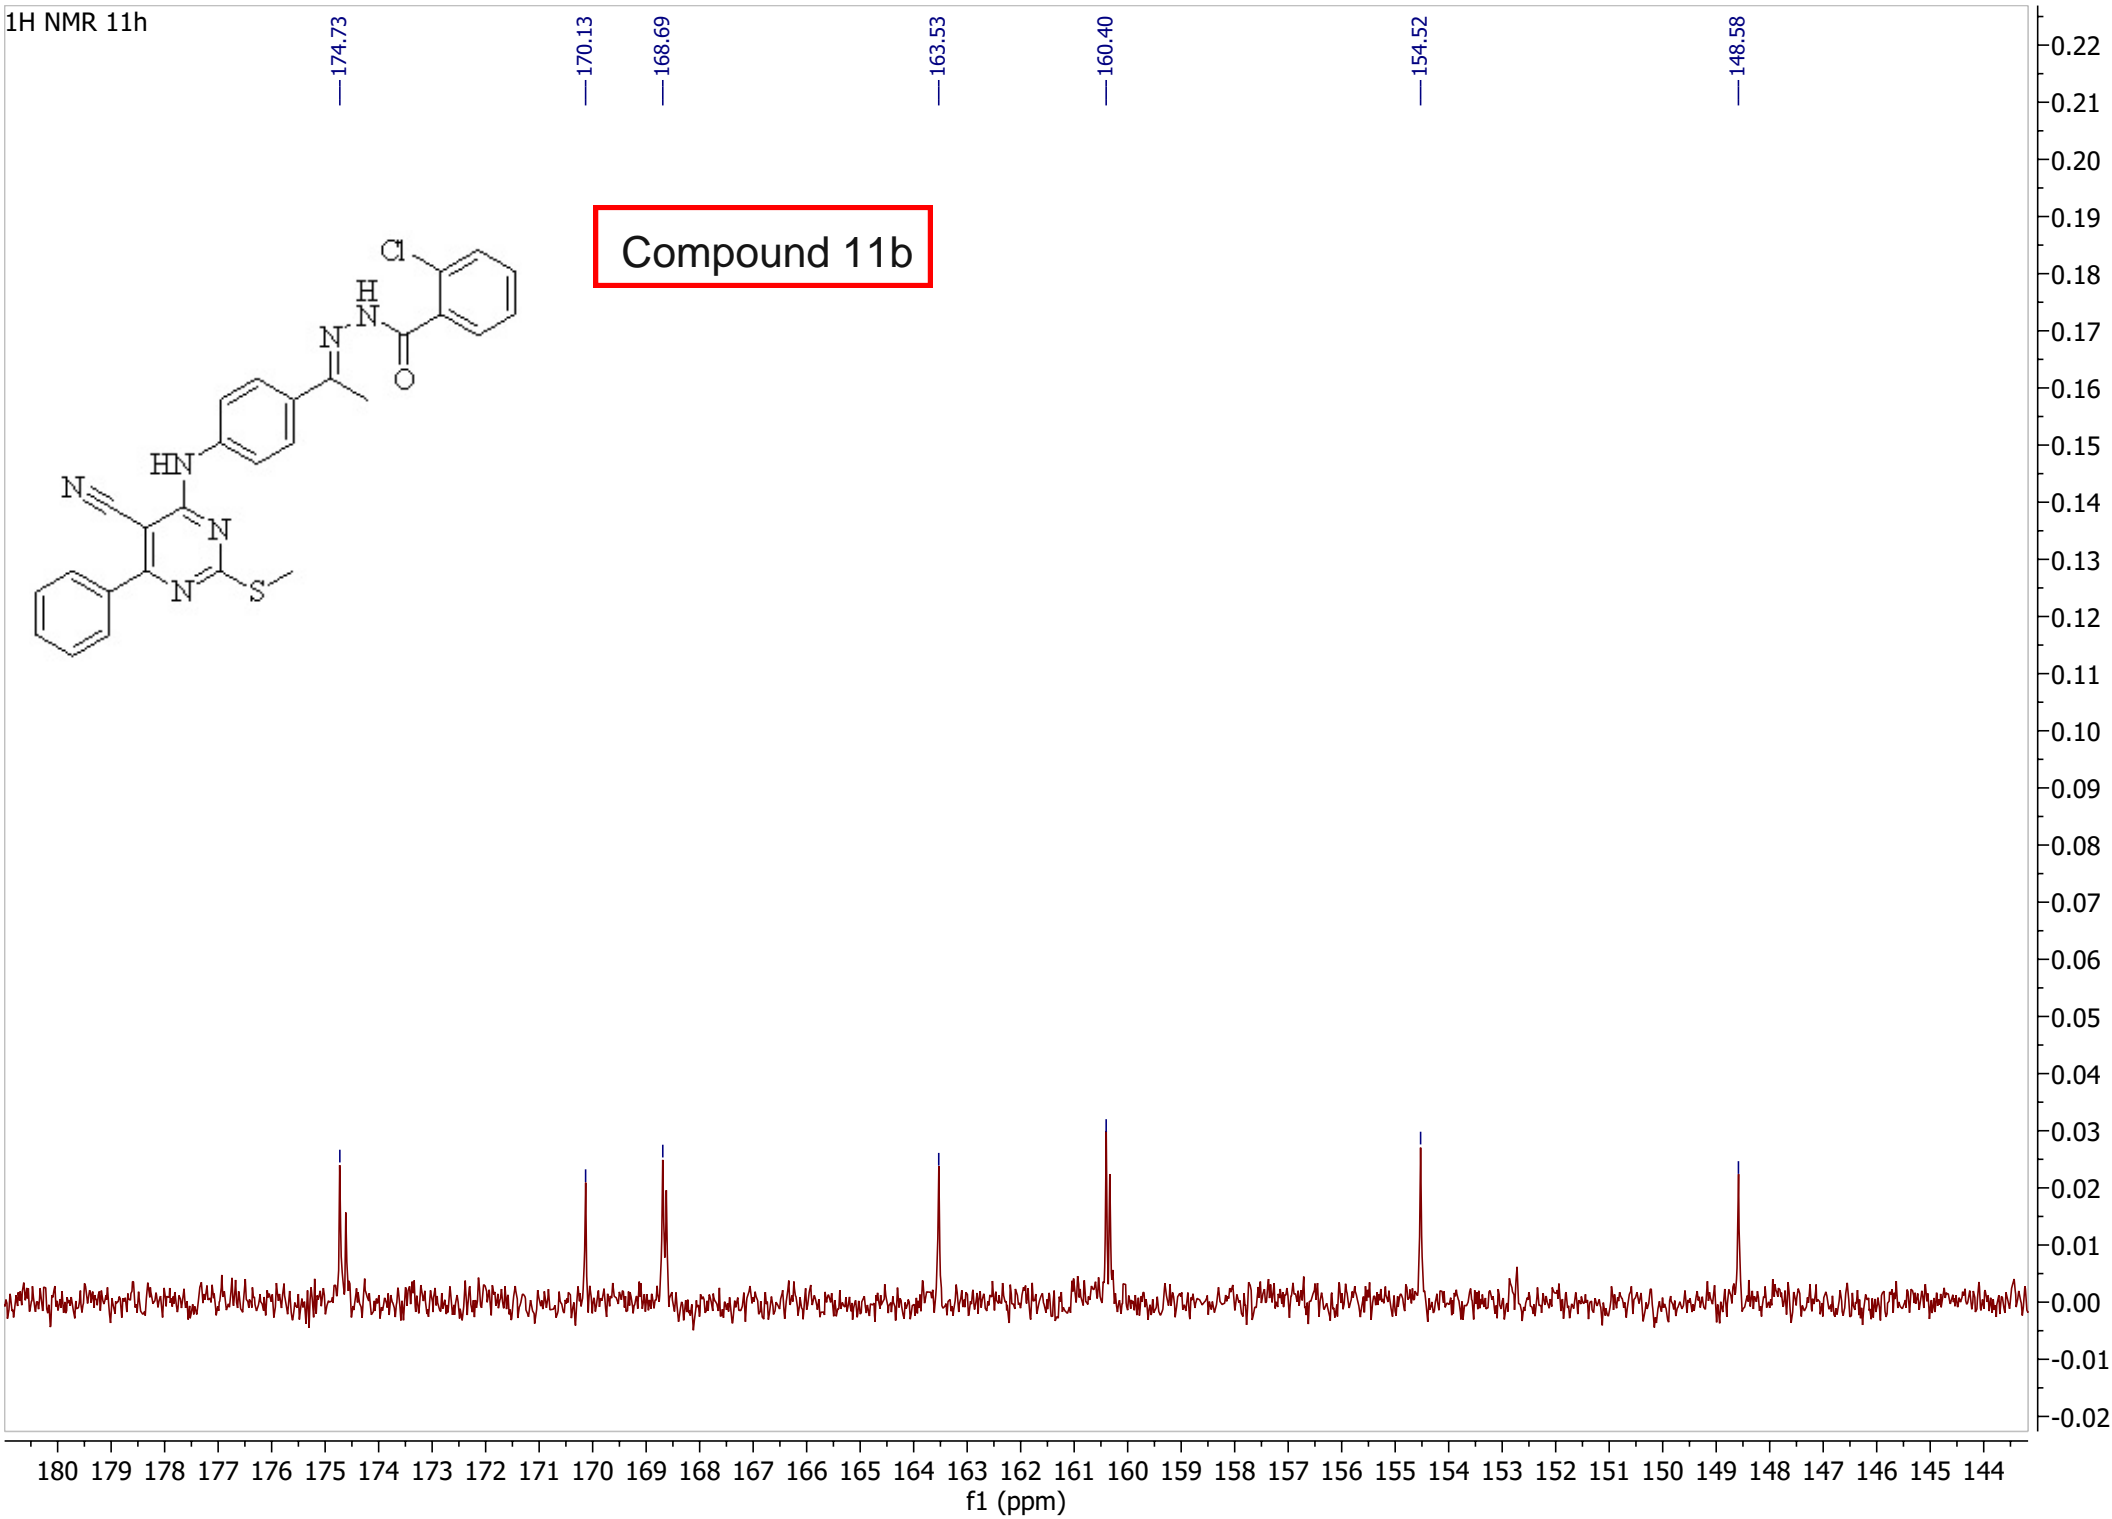

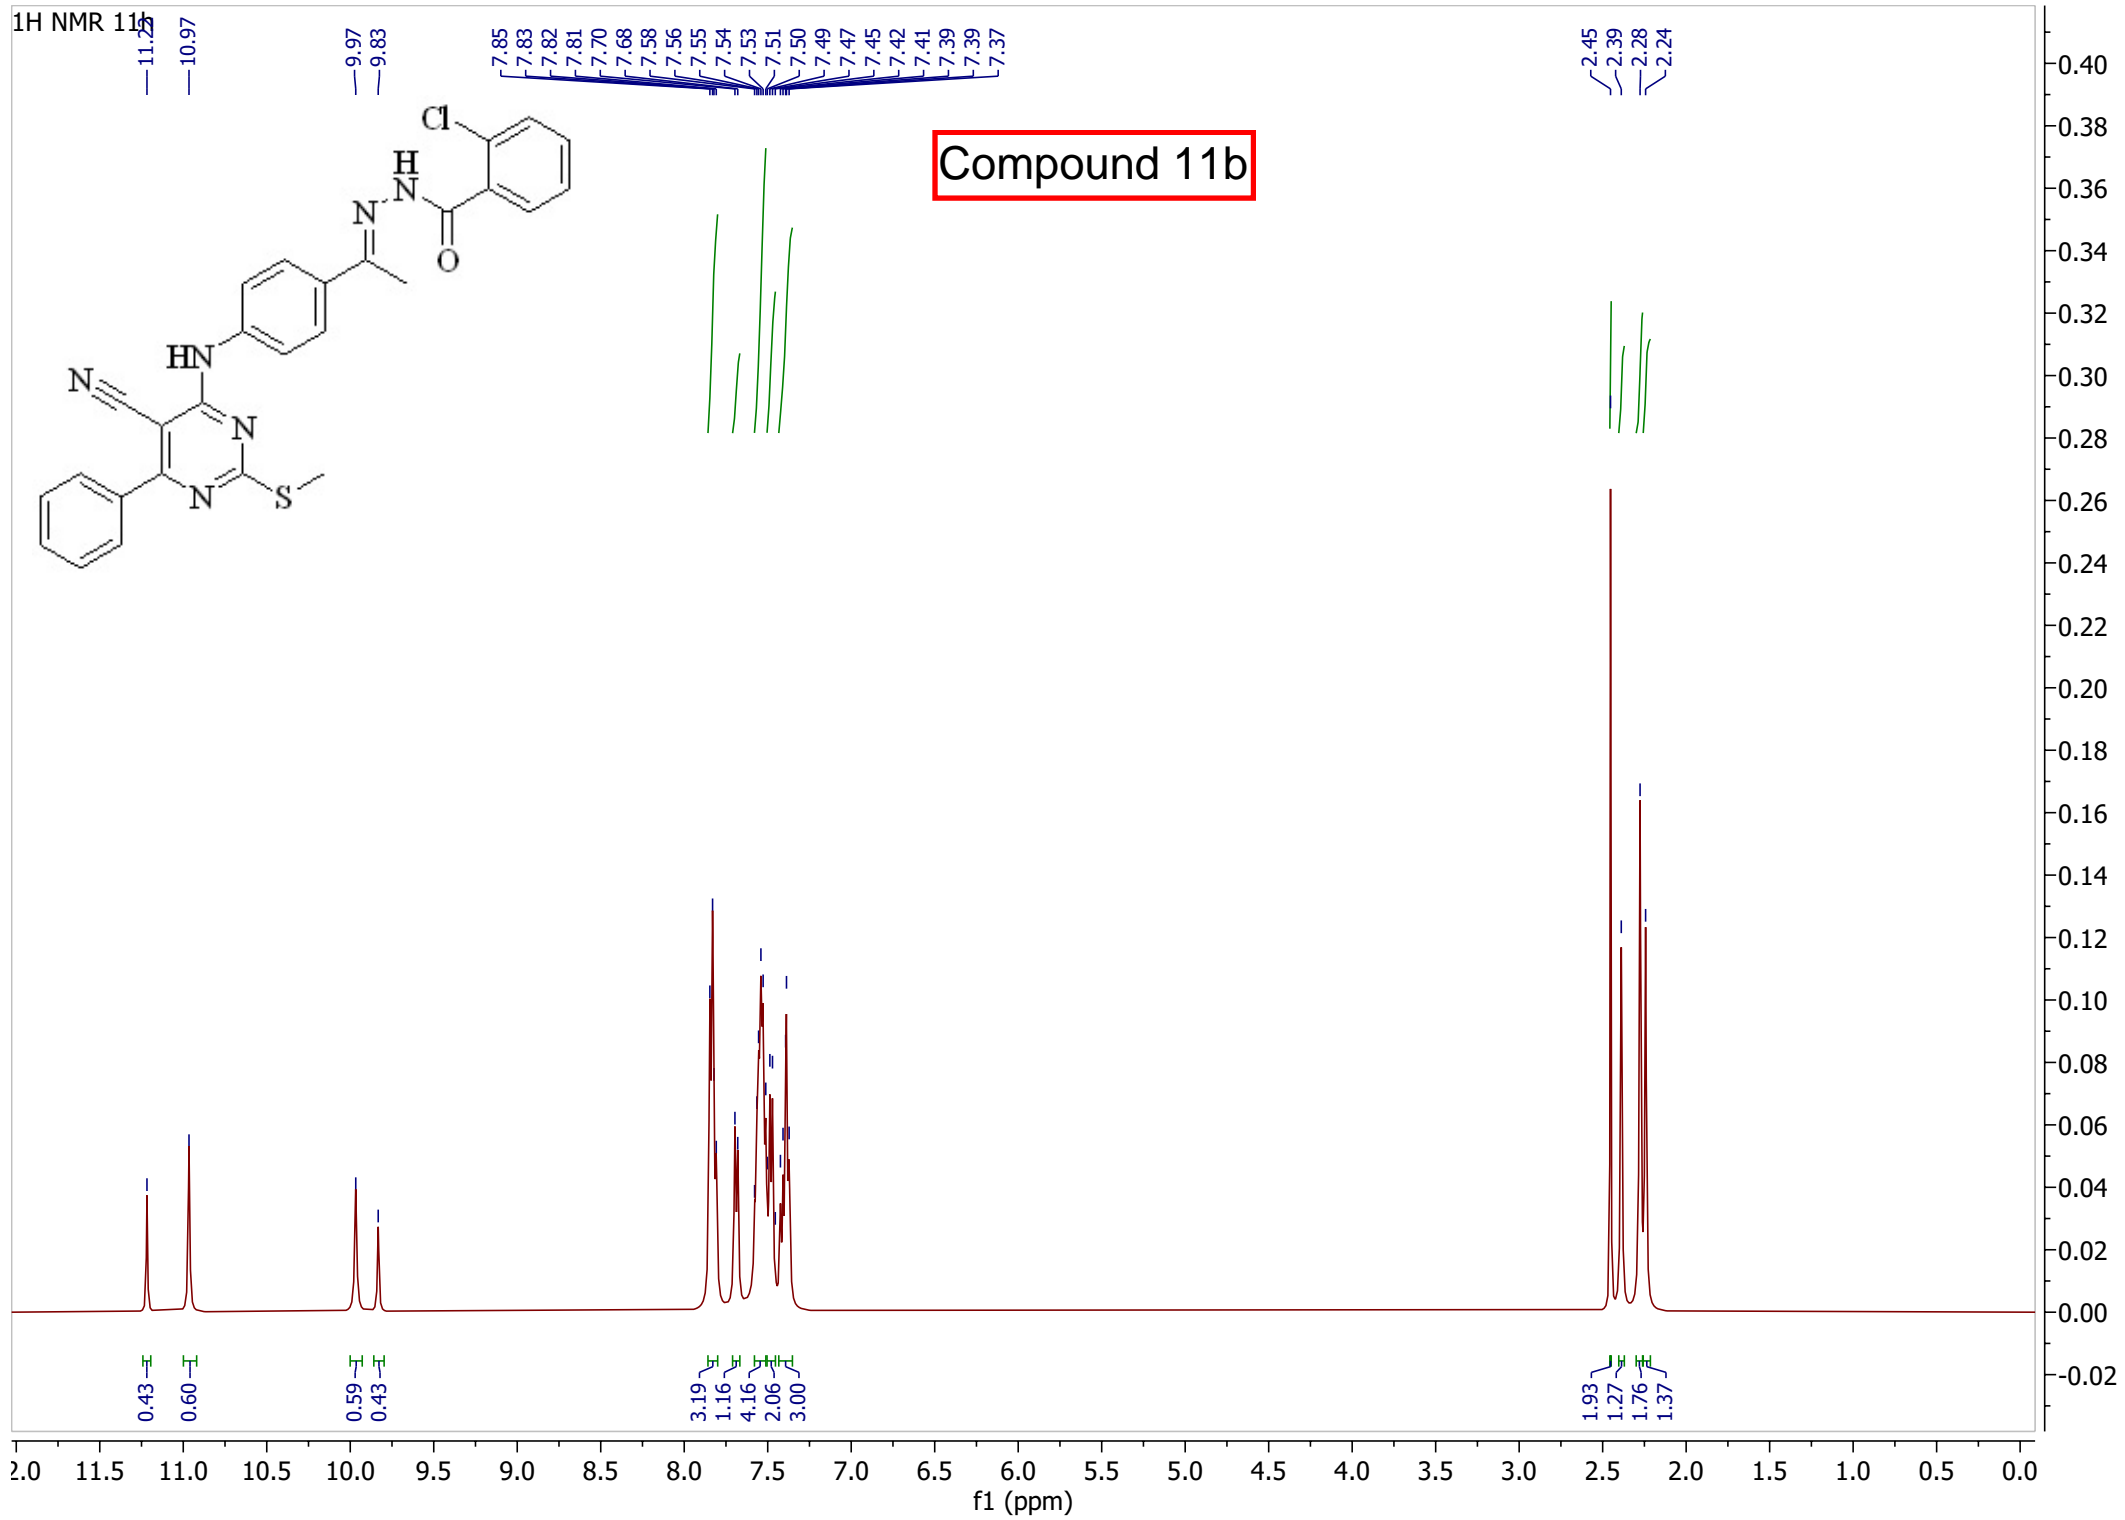







# SAMPLE INFORMATION

|                   |                          |                     |                                 |
|-------------------|--------------------------|---------------------|---------------------------------|
| Sample Name:      | ASZ8 <b>Compound 11c</b> | Acquired By:        | System                          |
| Sample Type:      | Unknown                  | Sample Set Name:    |                                 |
| Vial:             | 10                       | Acq. Method Set:    | Organic                         |
| Injection #:      | 1                        | Processing Method:  | Default                         |
| Injection Volume: | 2.00 ul                  | Channel Name:       | 320.0nm@1                       |
| Run Time:         | 14.0 Minutes             | Proc. Chnl. Descr.: | W2996 FDA 320.0 nm(FDA 190.0 to |

Date Acquired: 11/6/2022 5:39:21 AMEET  
 Date Processed: 11/6/2022 5:48:29 AMEET

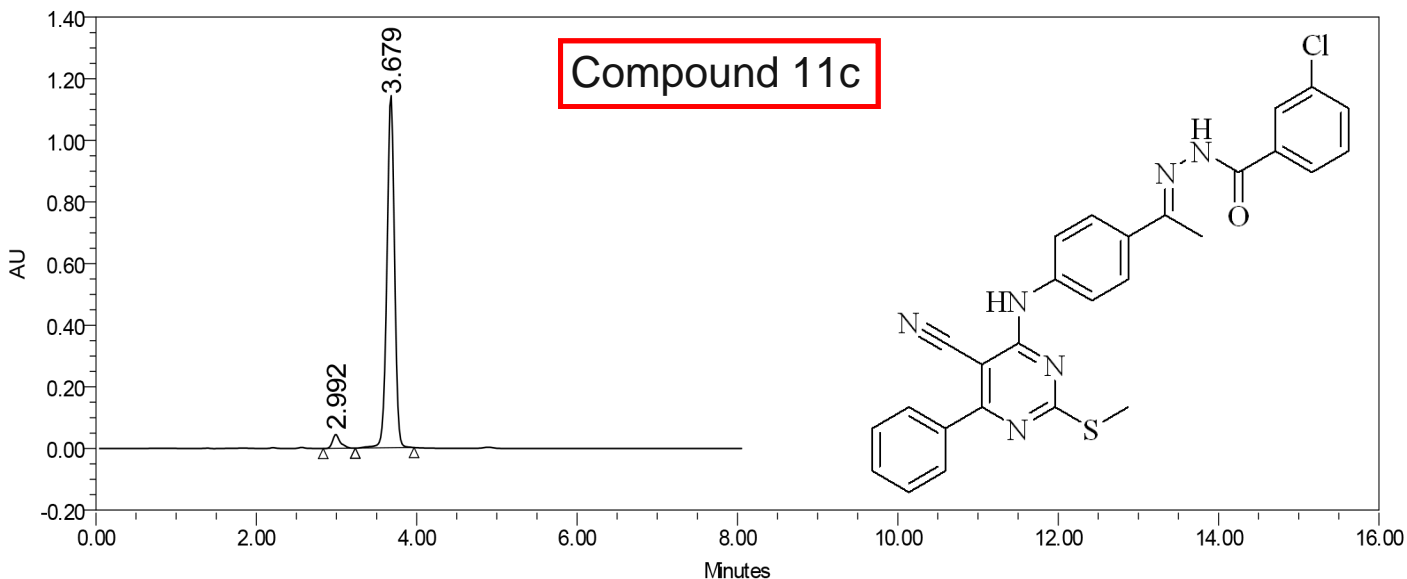

|   | RT    | Area    | % Area | Height  |
|---|-------|---------|--------|---------|
| 1 | 2.992 | 297834  | 3.75   | 44622   |
| 2 | 3.679 | 7639522 | 96.25  | 1142412 |

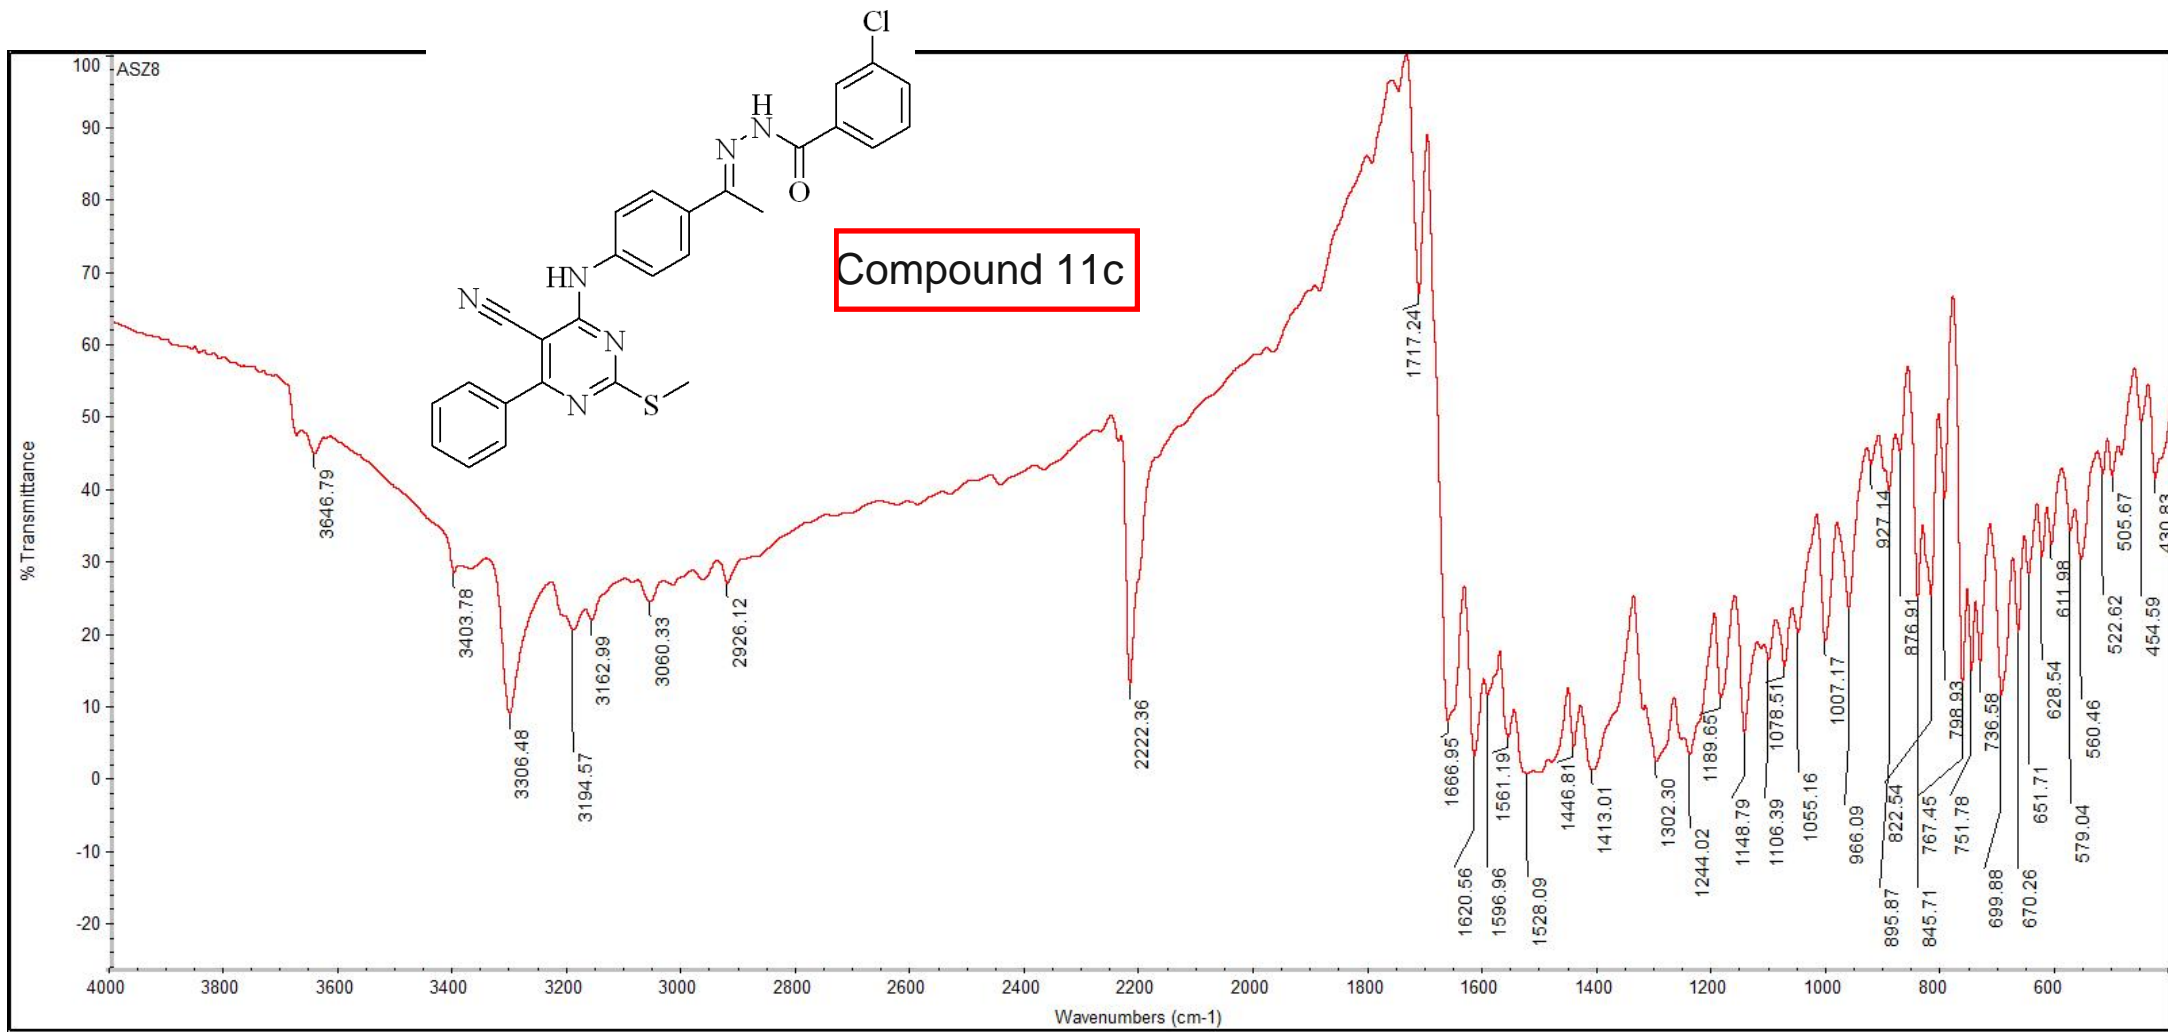

<sup>1</sup>H NMR 11h

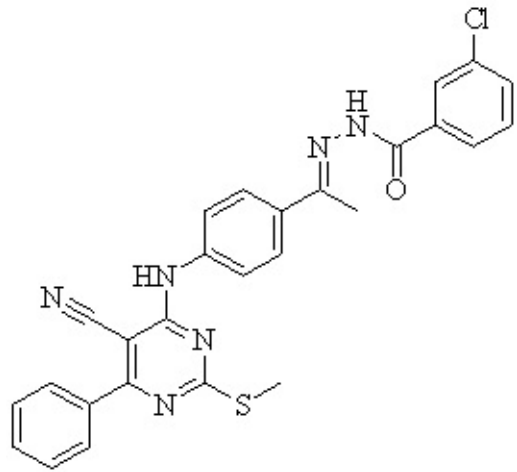

Compound 11c

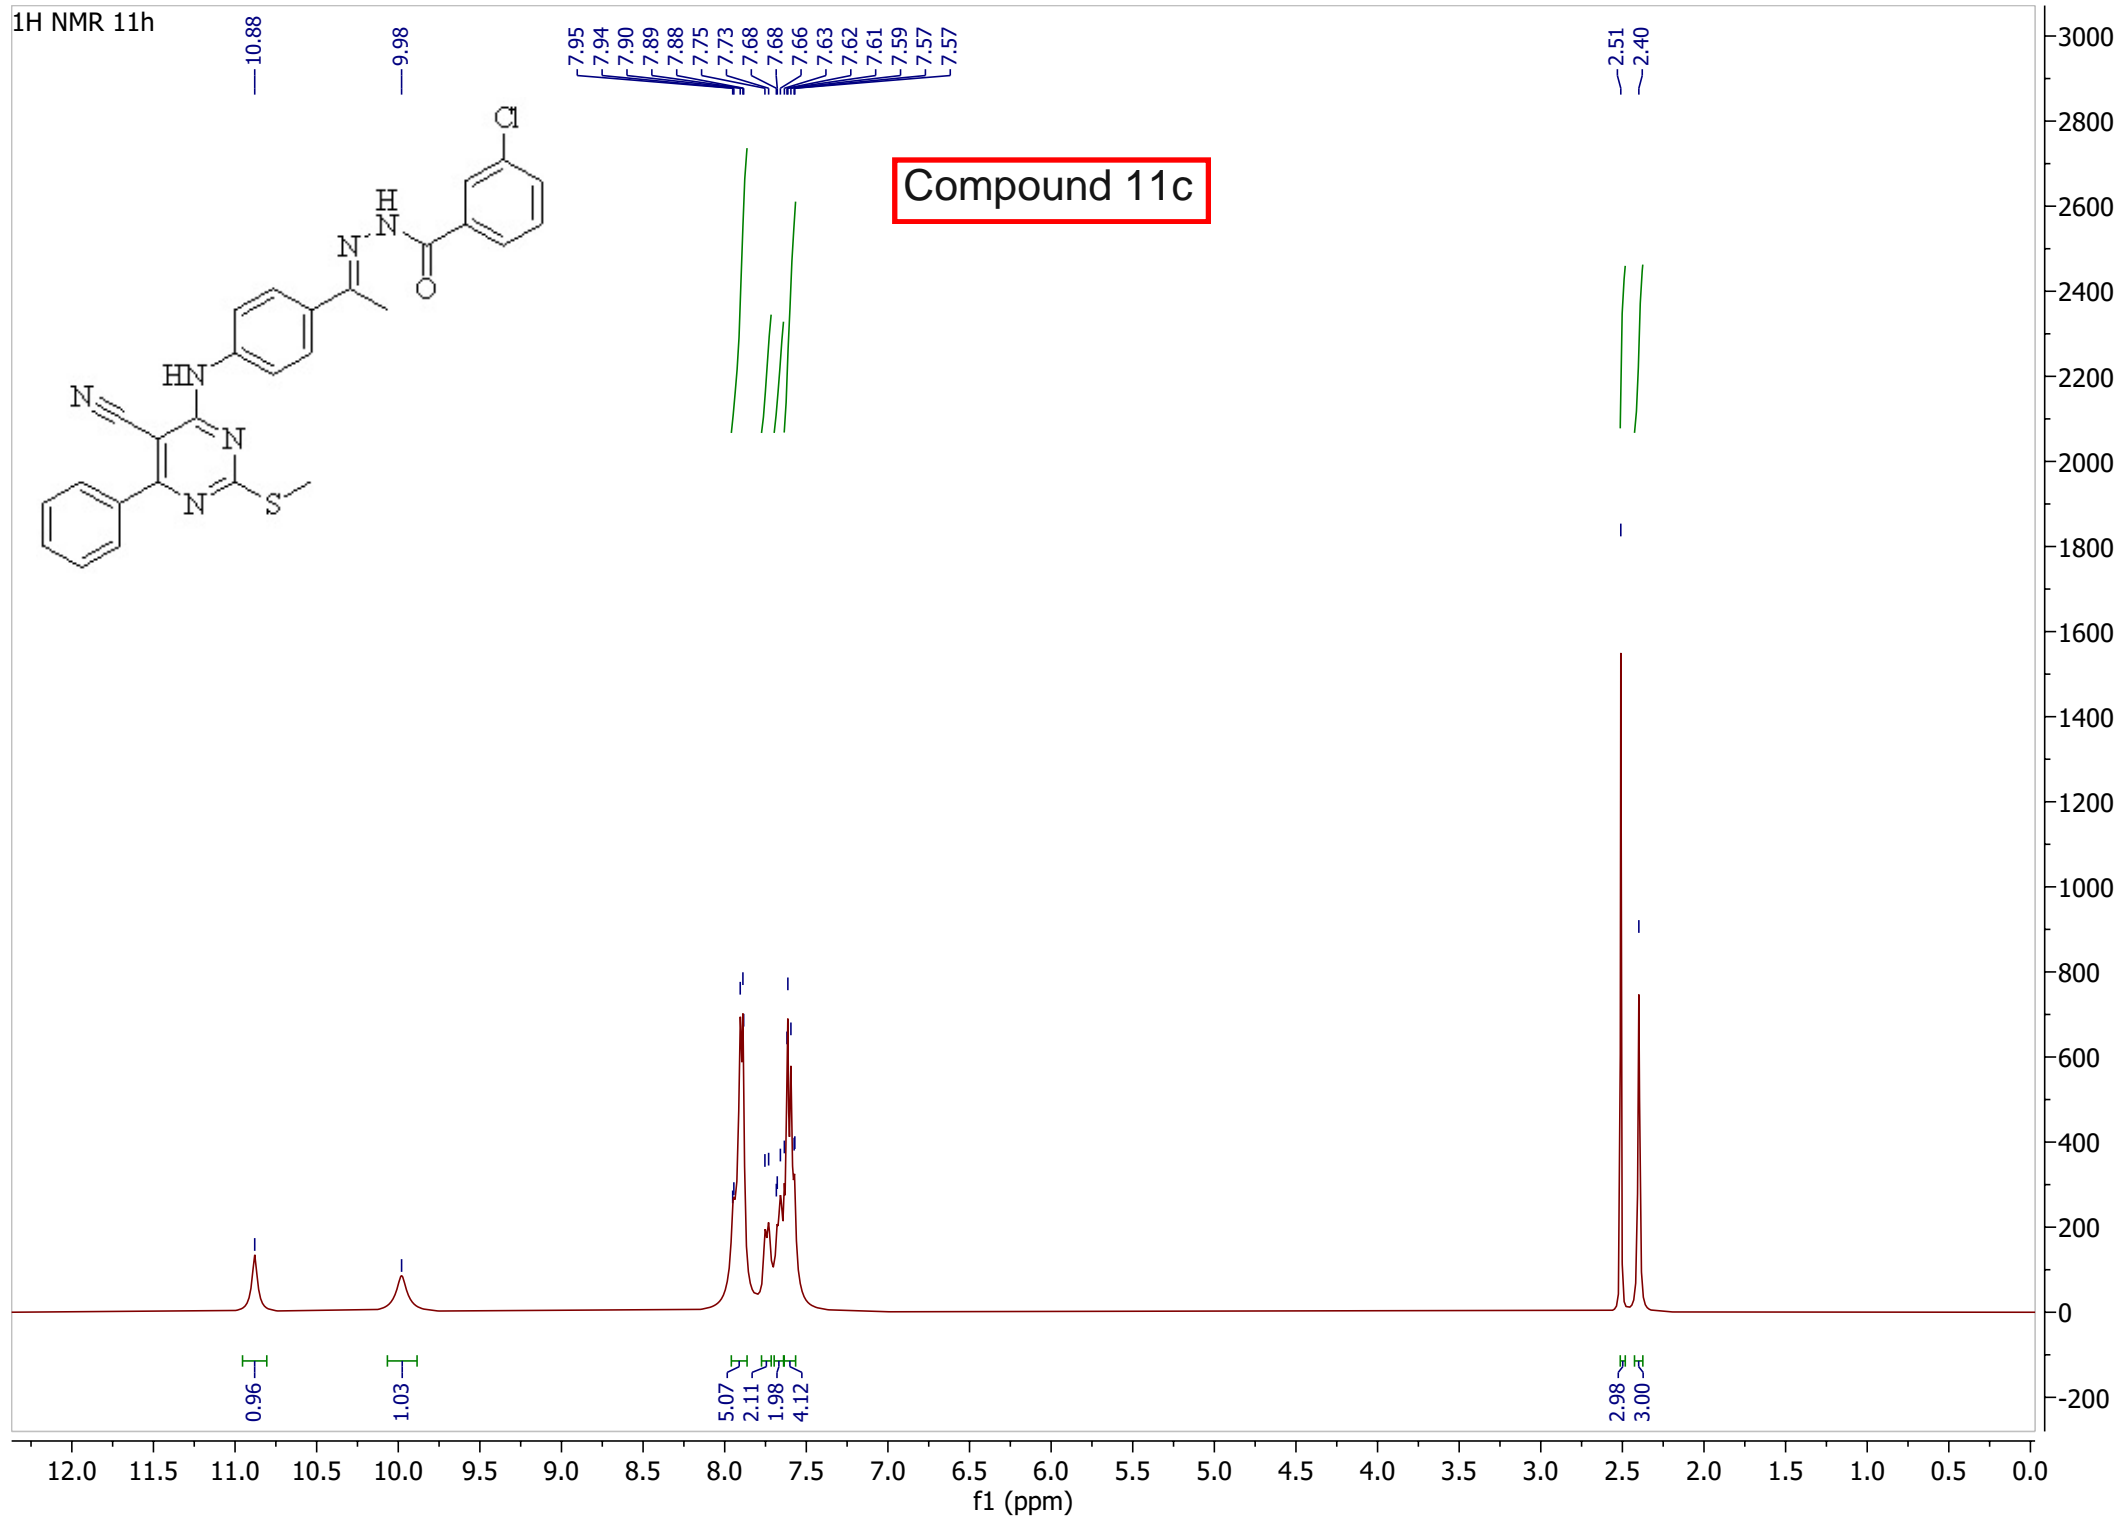

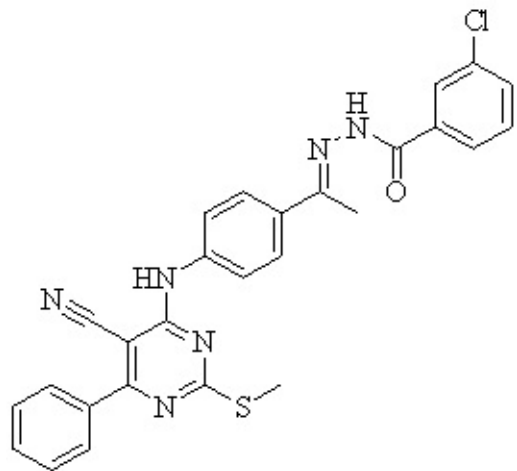

Compound 11c

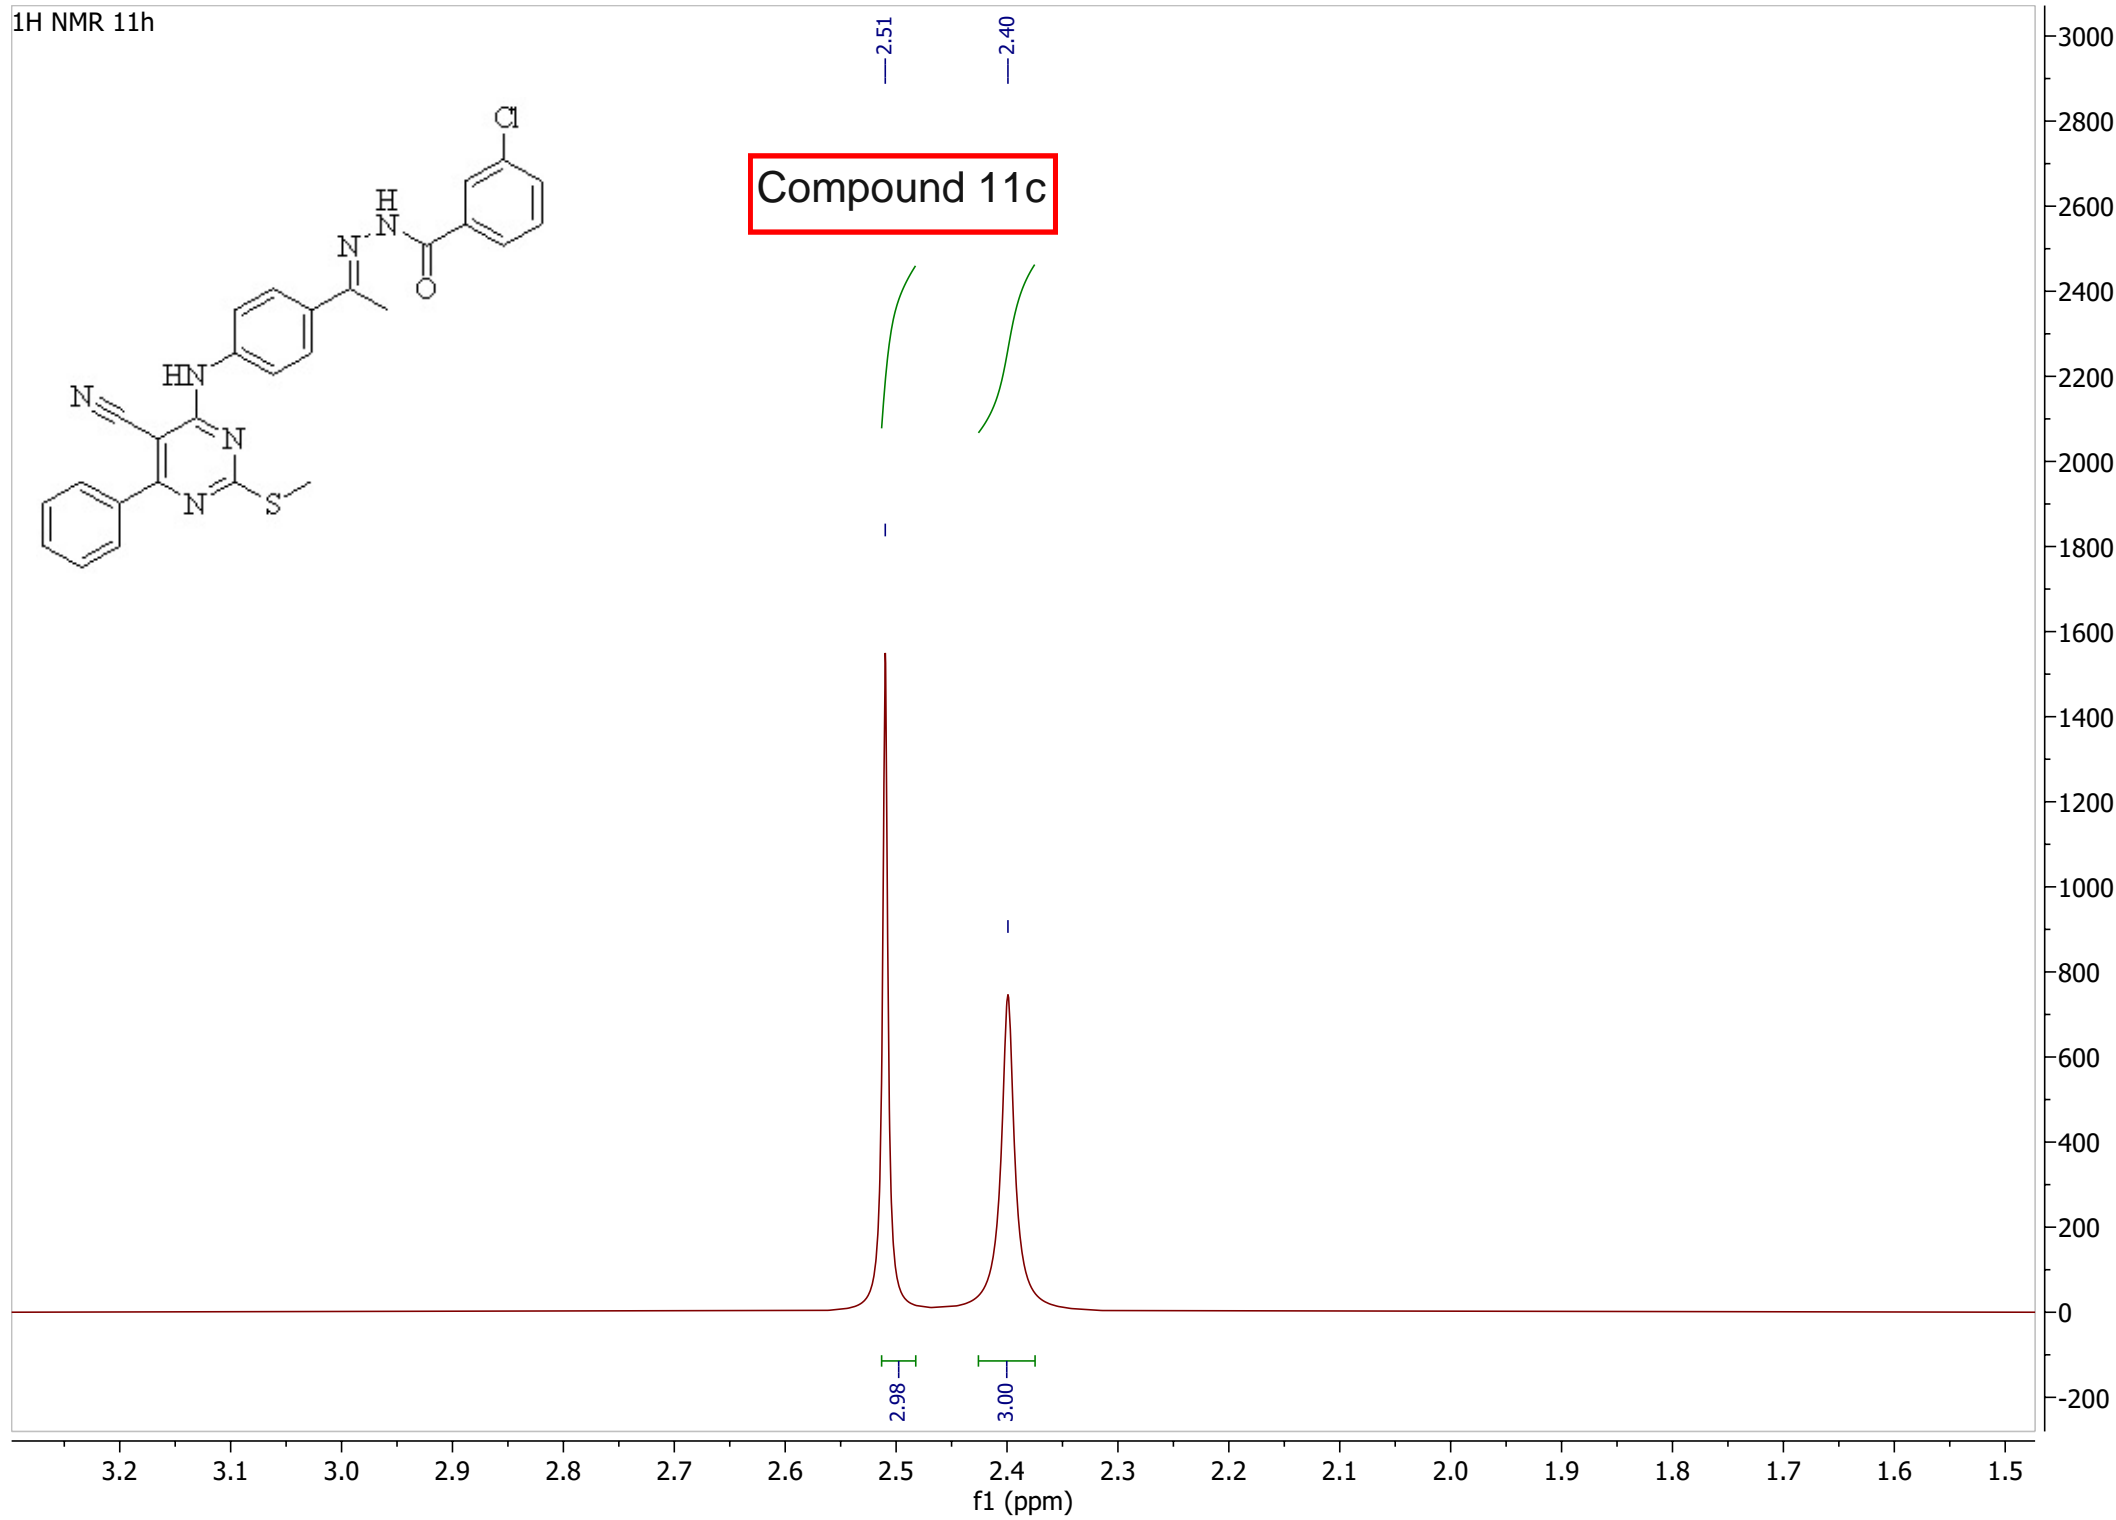

<sup>1</sup>H NMR 11h



Compound 11c

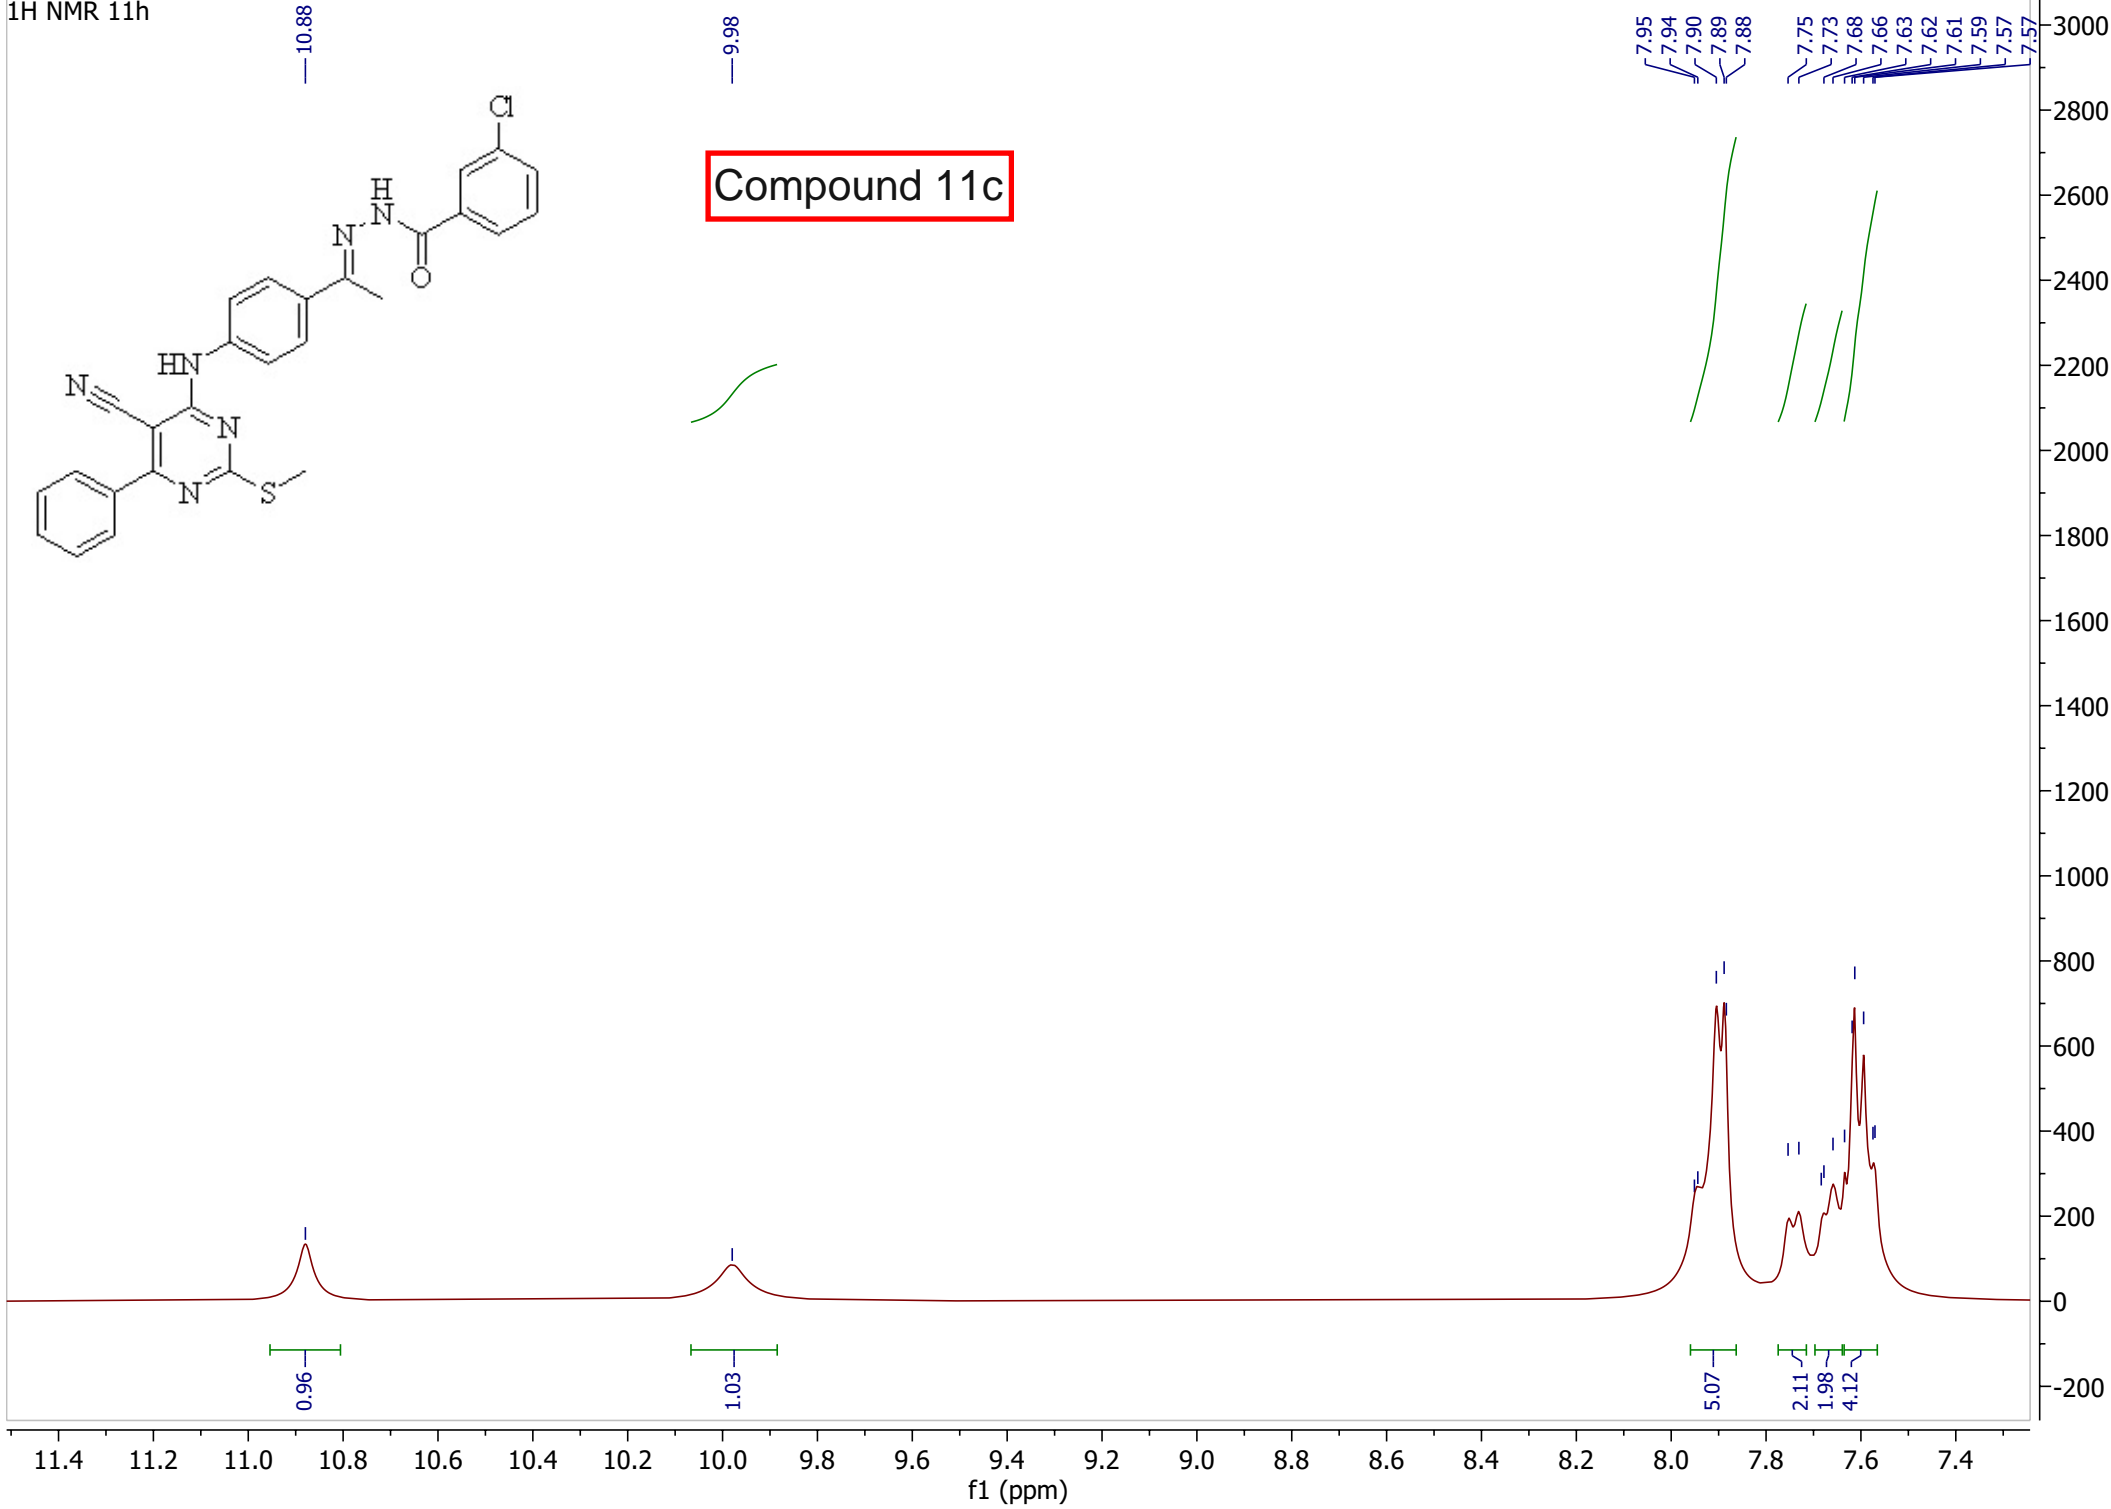

<sup>1</sup>H NMR 11h



Compound 11c

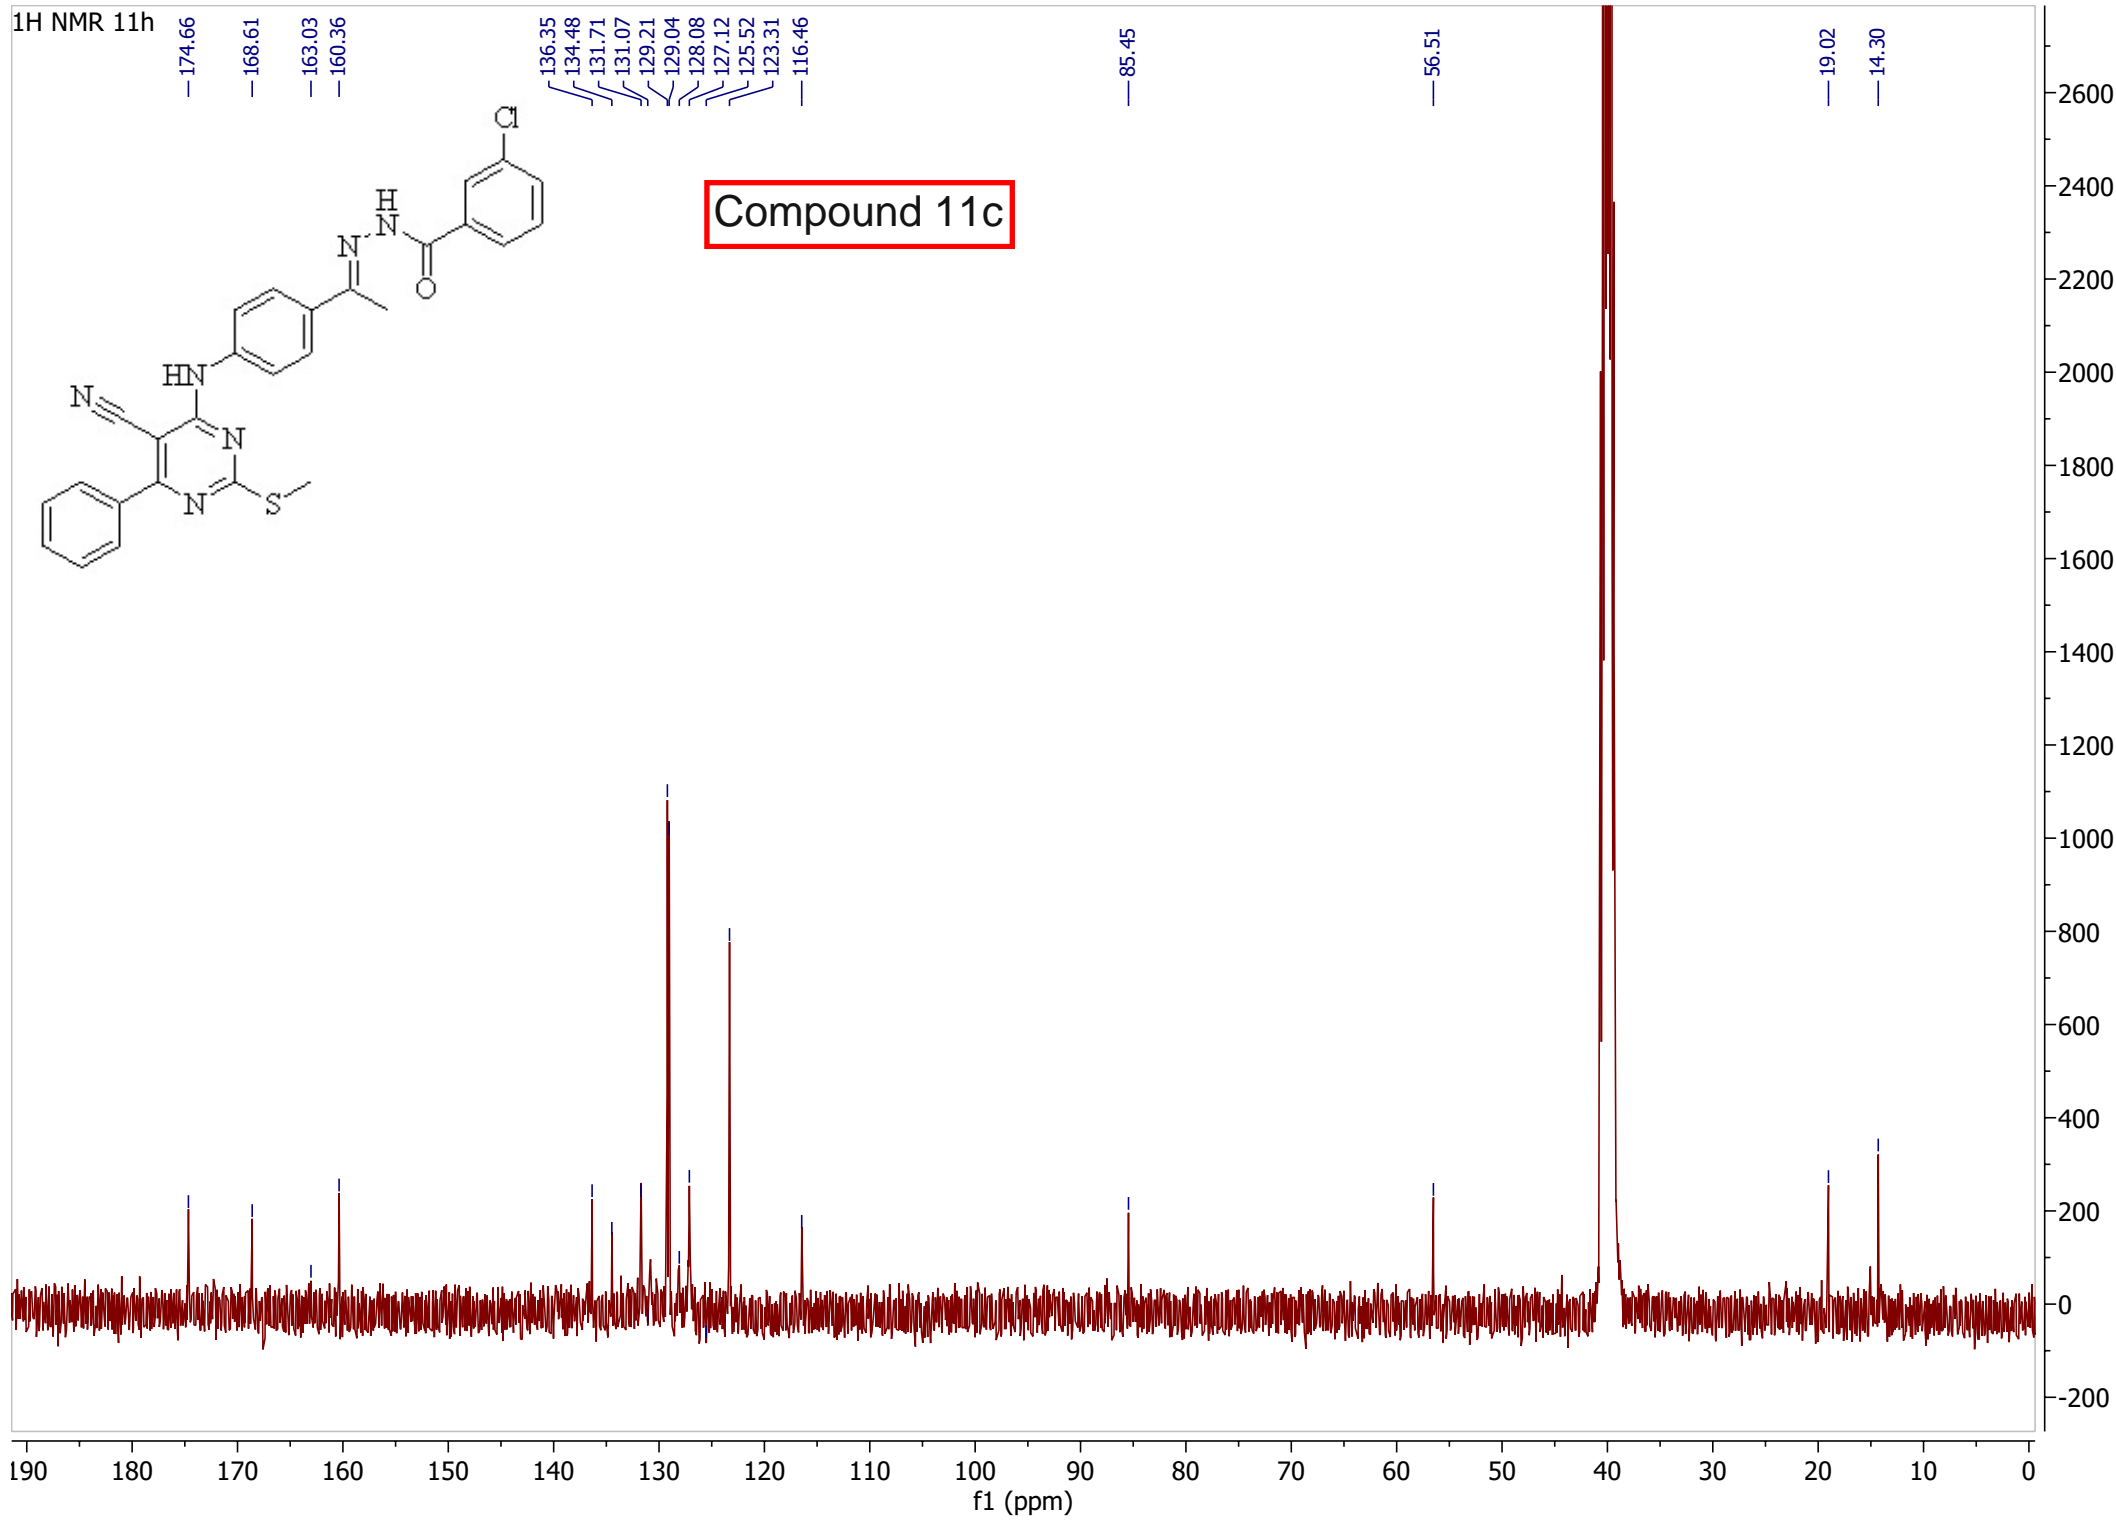



<sup>1</sup>H NMR 11h



Compound 11c

85.45

56.51

19.02

14.30

100 95 90 85 80 75 70 65 60 55 50 45 40 35 30 25 20 15 10 5 0

f1 (ppm)

3200  
3000  
2800  
2600  
2400  
2200  
2000  
1800  
1600  
1400  
1200  
1000  
800  
600  
400  
200  
0  
-200

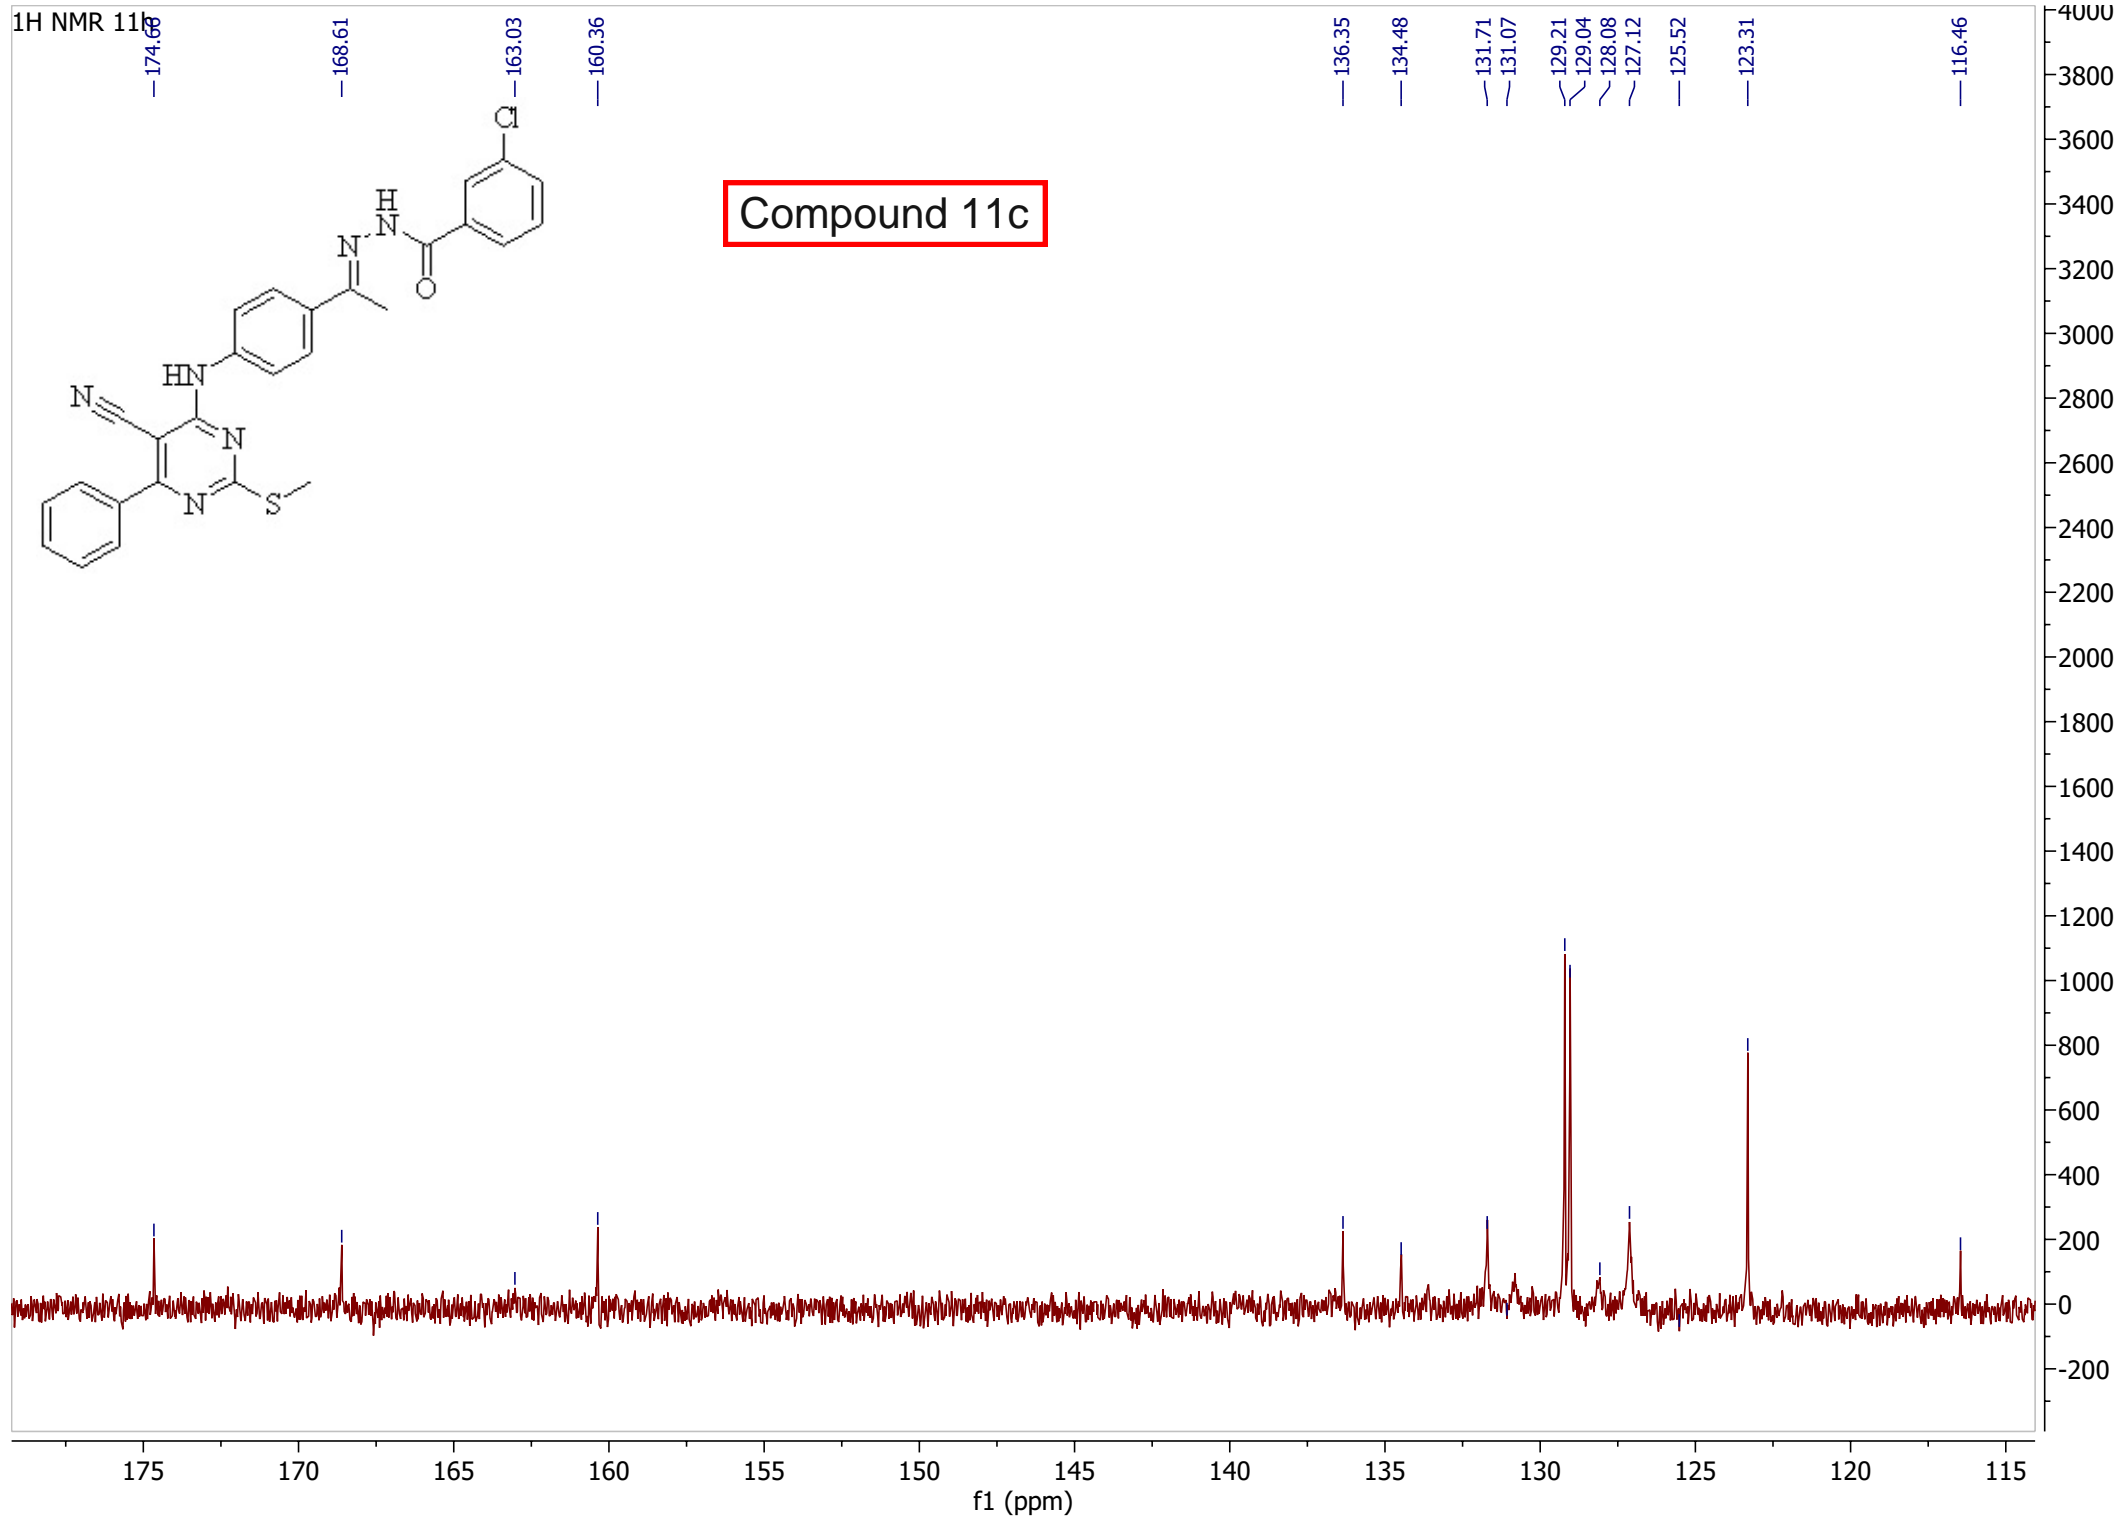

RT: 2.72 - 2.91 SM: 11B

# Compound 11c

NL:  
5.05E3  
TIC MS  
Abdelrahma  
n-saleh-  
Asz8

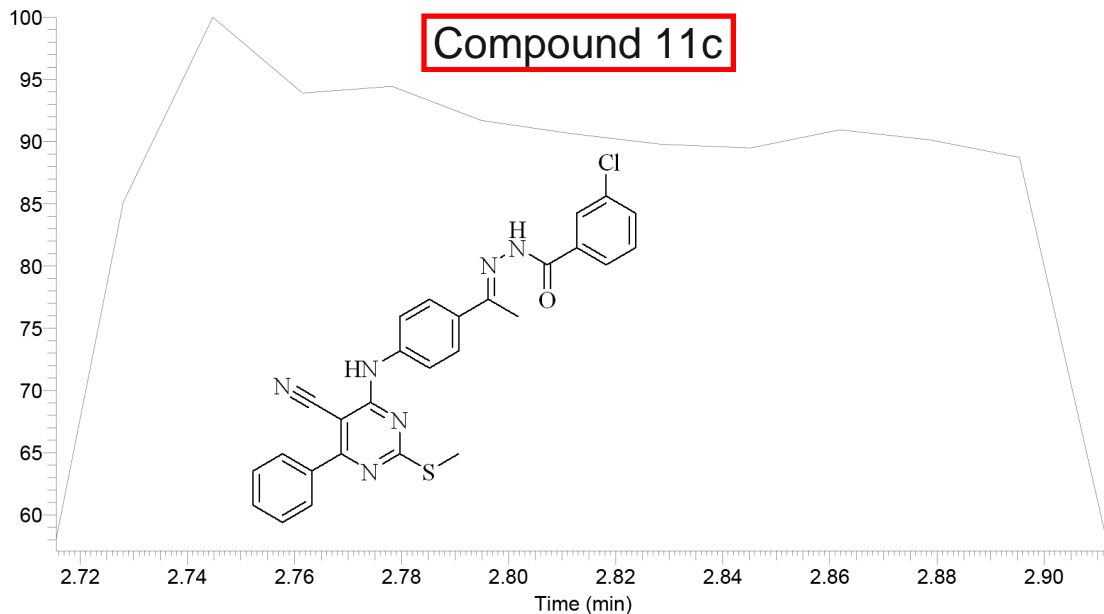

Abdelrahman-saleh-Asz8 #217-220 RT: 3.65-3.70 AV: 4 SB: 26 1.21-1.34 , 0.87-1.14 NL: 1.09E2  
T: + c EI Full ms [40.00-1000.00]

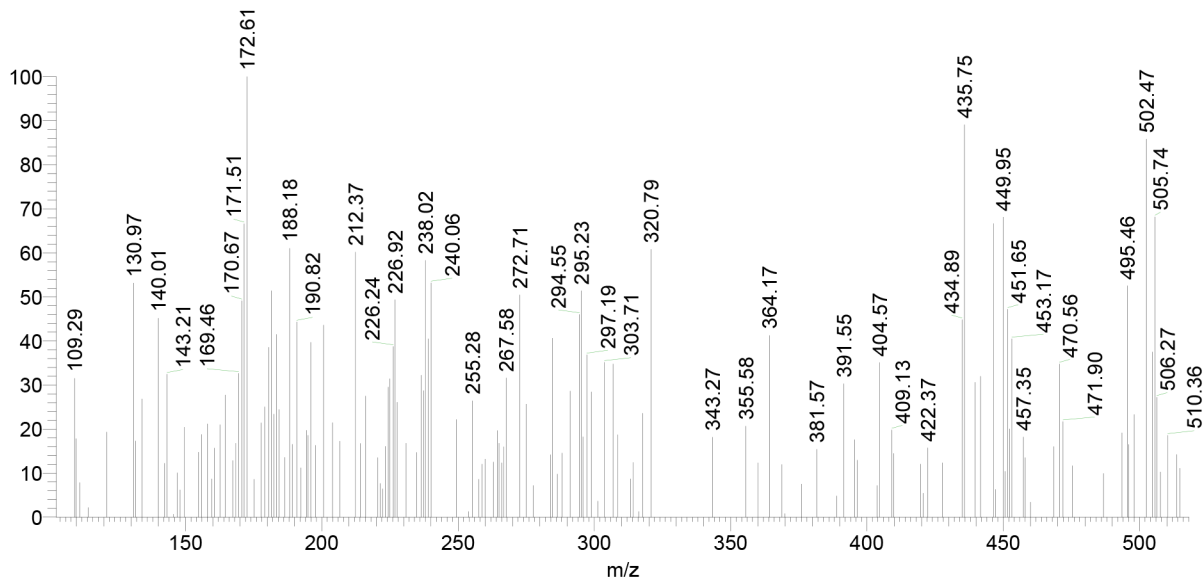

# SAMPLE INFORMATION

|                   |                          |                     |                                 |
|-------------------|--------------------------|---------------------|---------------------------------|
| Sample Name:      | ASZ5 <b>Compound 11d</b> | Acquired By:        | System                          |
| Sample Type:      | Unknown                  | Sample Set Name:    | 1                               |
| Vial:             | 8                        | Acq. Method Set:    | Organic                         |
| Injection #:      | 1                        | Processing Method:  | Default                         |
| Injection Volume: | 2.00 ul                  | Channel Name:       | 318.0nm                         |
| Run Time:         | 14.5 Minutes             | Proc. Chnl. Descr.: | W2996 FDA 318.0 nm(FDA 190.0 to |
|                   |                          |                     |                                 |
| Date Acquired:    | 11/6/2022 12:01:19 AMEET |                     |                                 |
| Date Processed:   | 11/6/2022 5:21:16 AMEET  |                     |                                 |

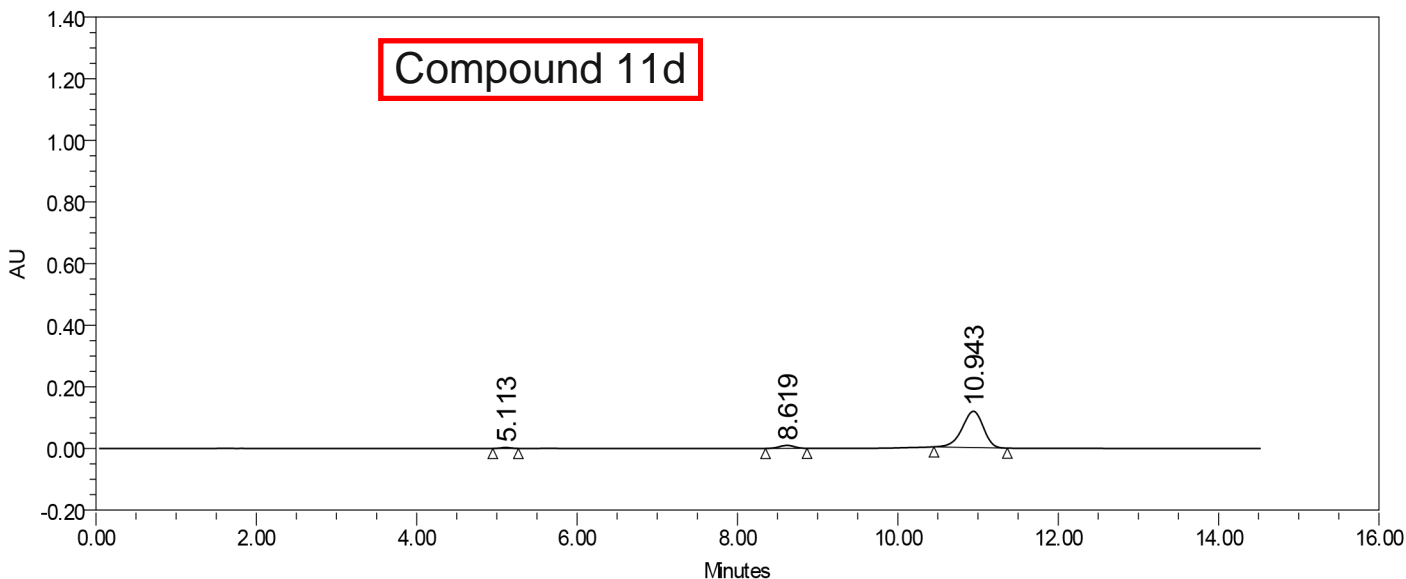

| RT | Area   | % Area  | Height |        |
|----|--------|---------|--------|--------|
| 1  | 5.113  | 26989   | 1.16   | 3282   |
| 2  | 8.619  | 125681  | 5.42   | 9731   |
| 3  | 10.943 | 2164478 | 93.41  | 117977 |

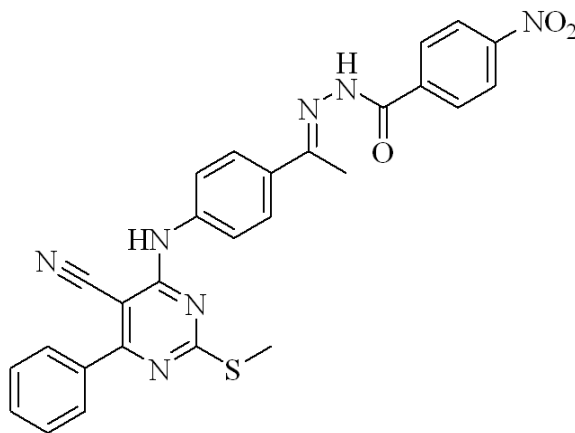

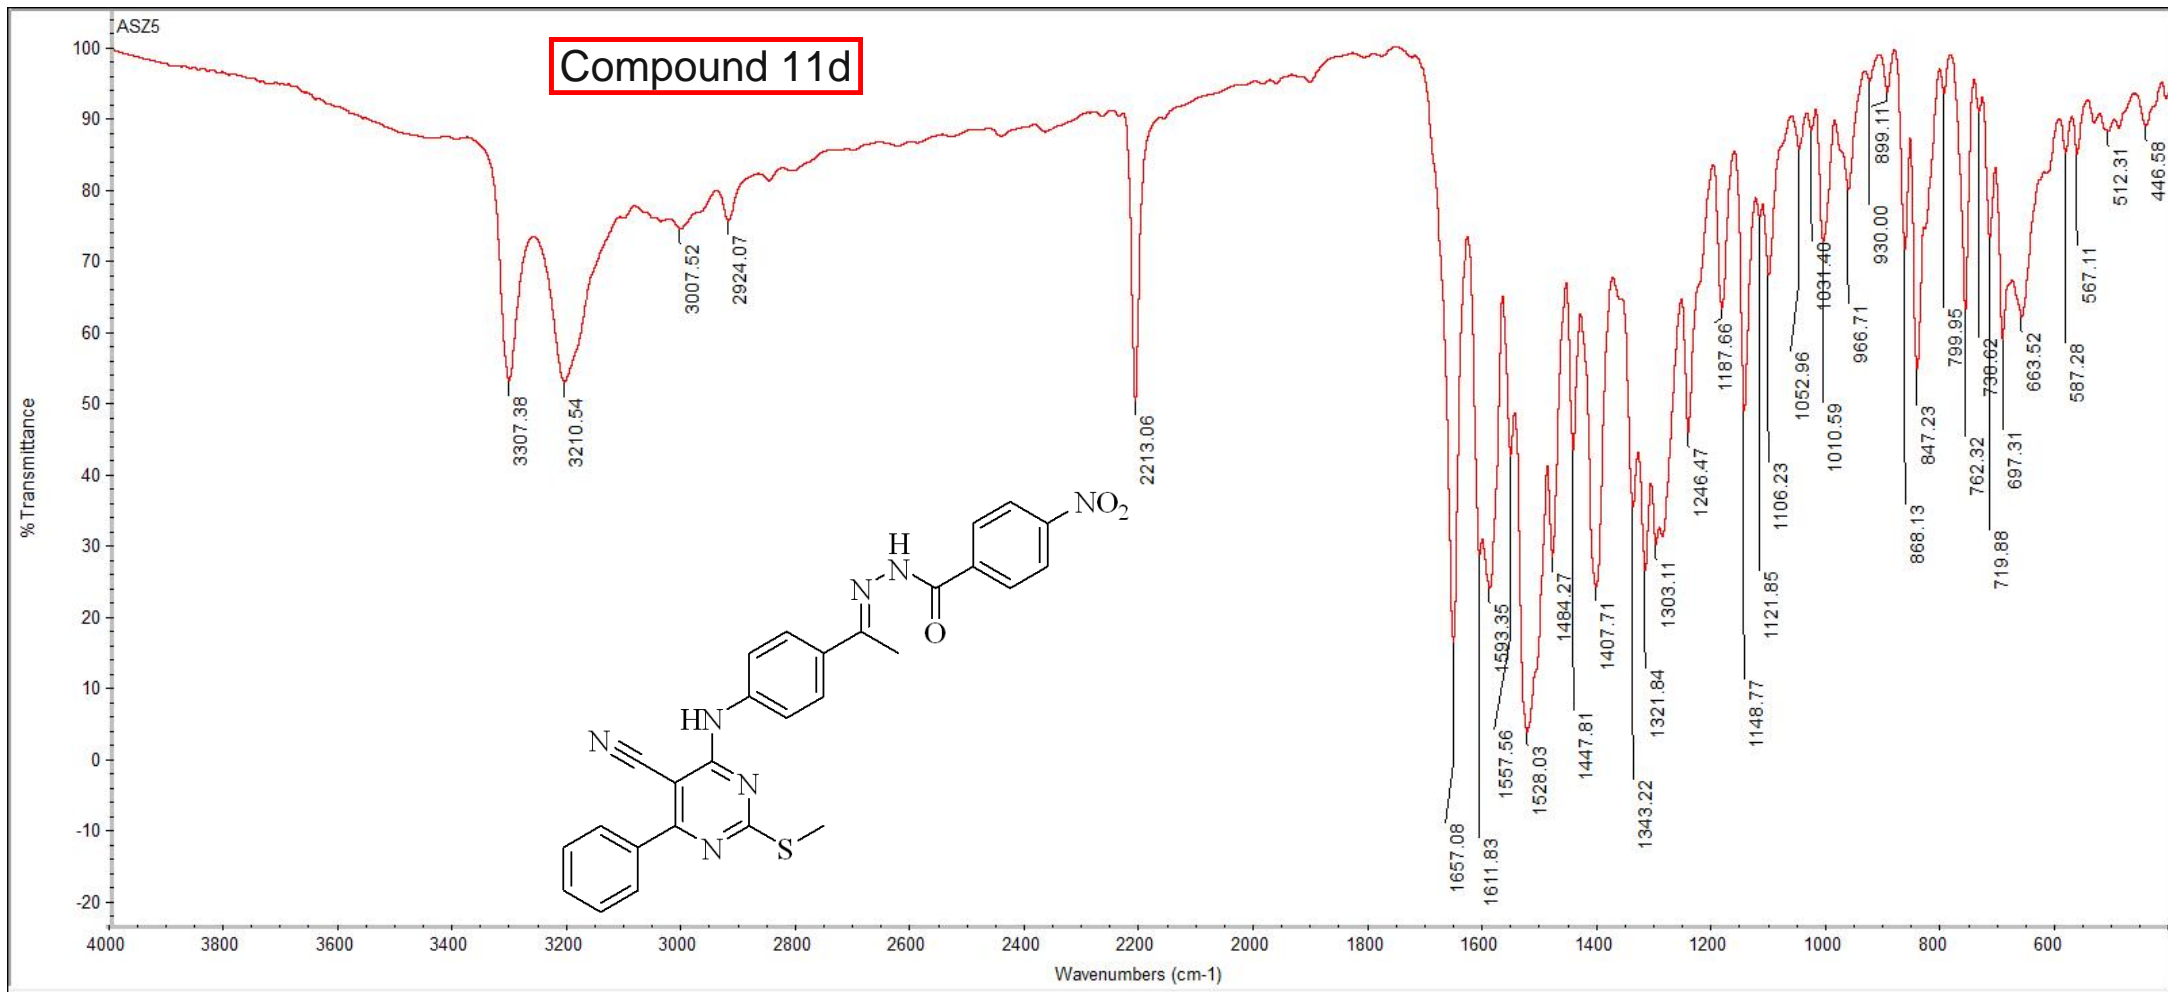

<sup>1</sup>H NMR 11d

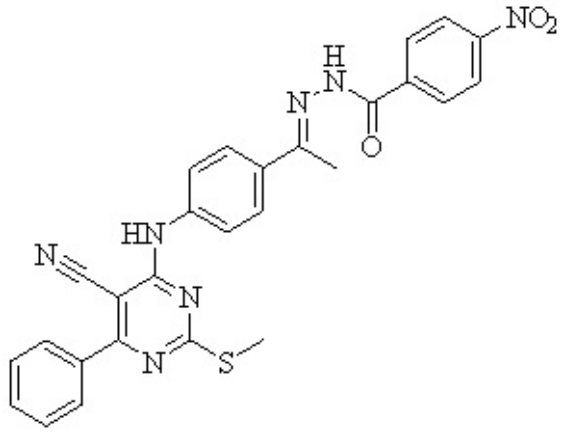

Compound 11d

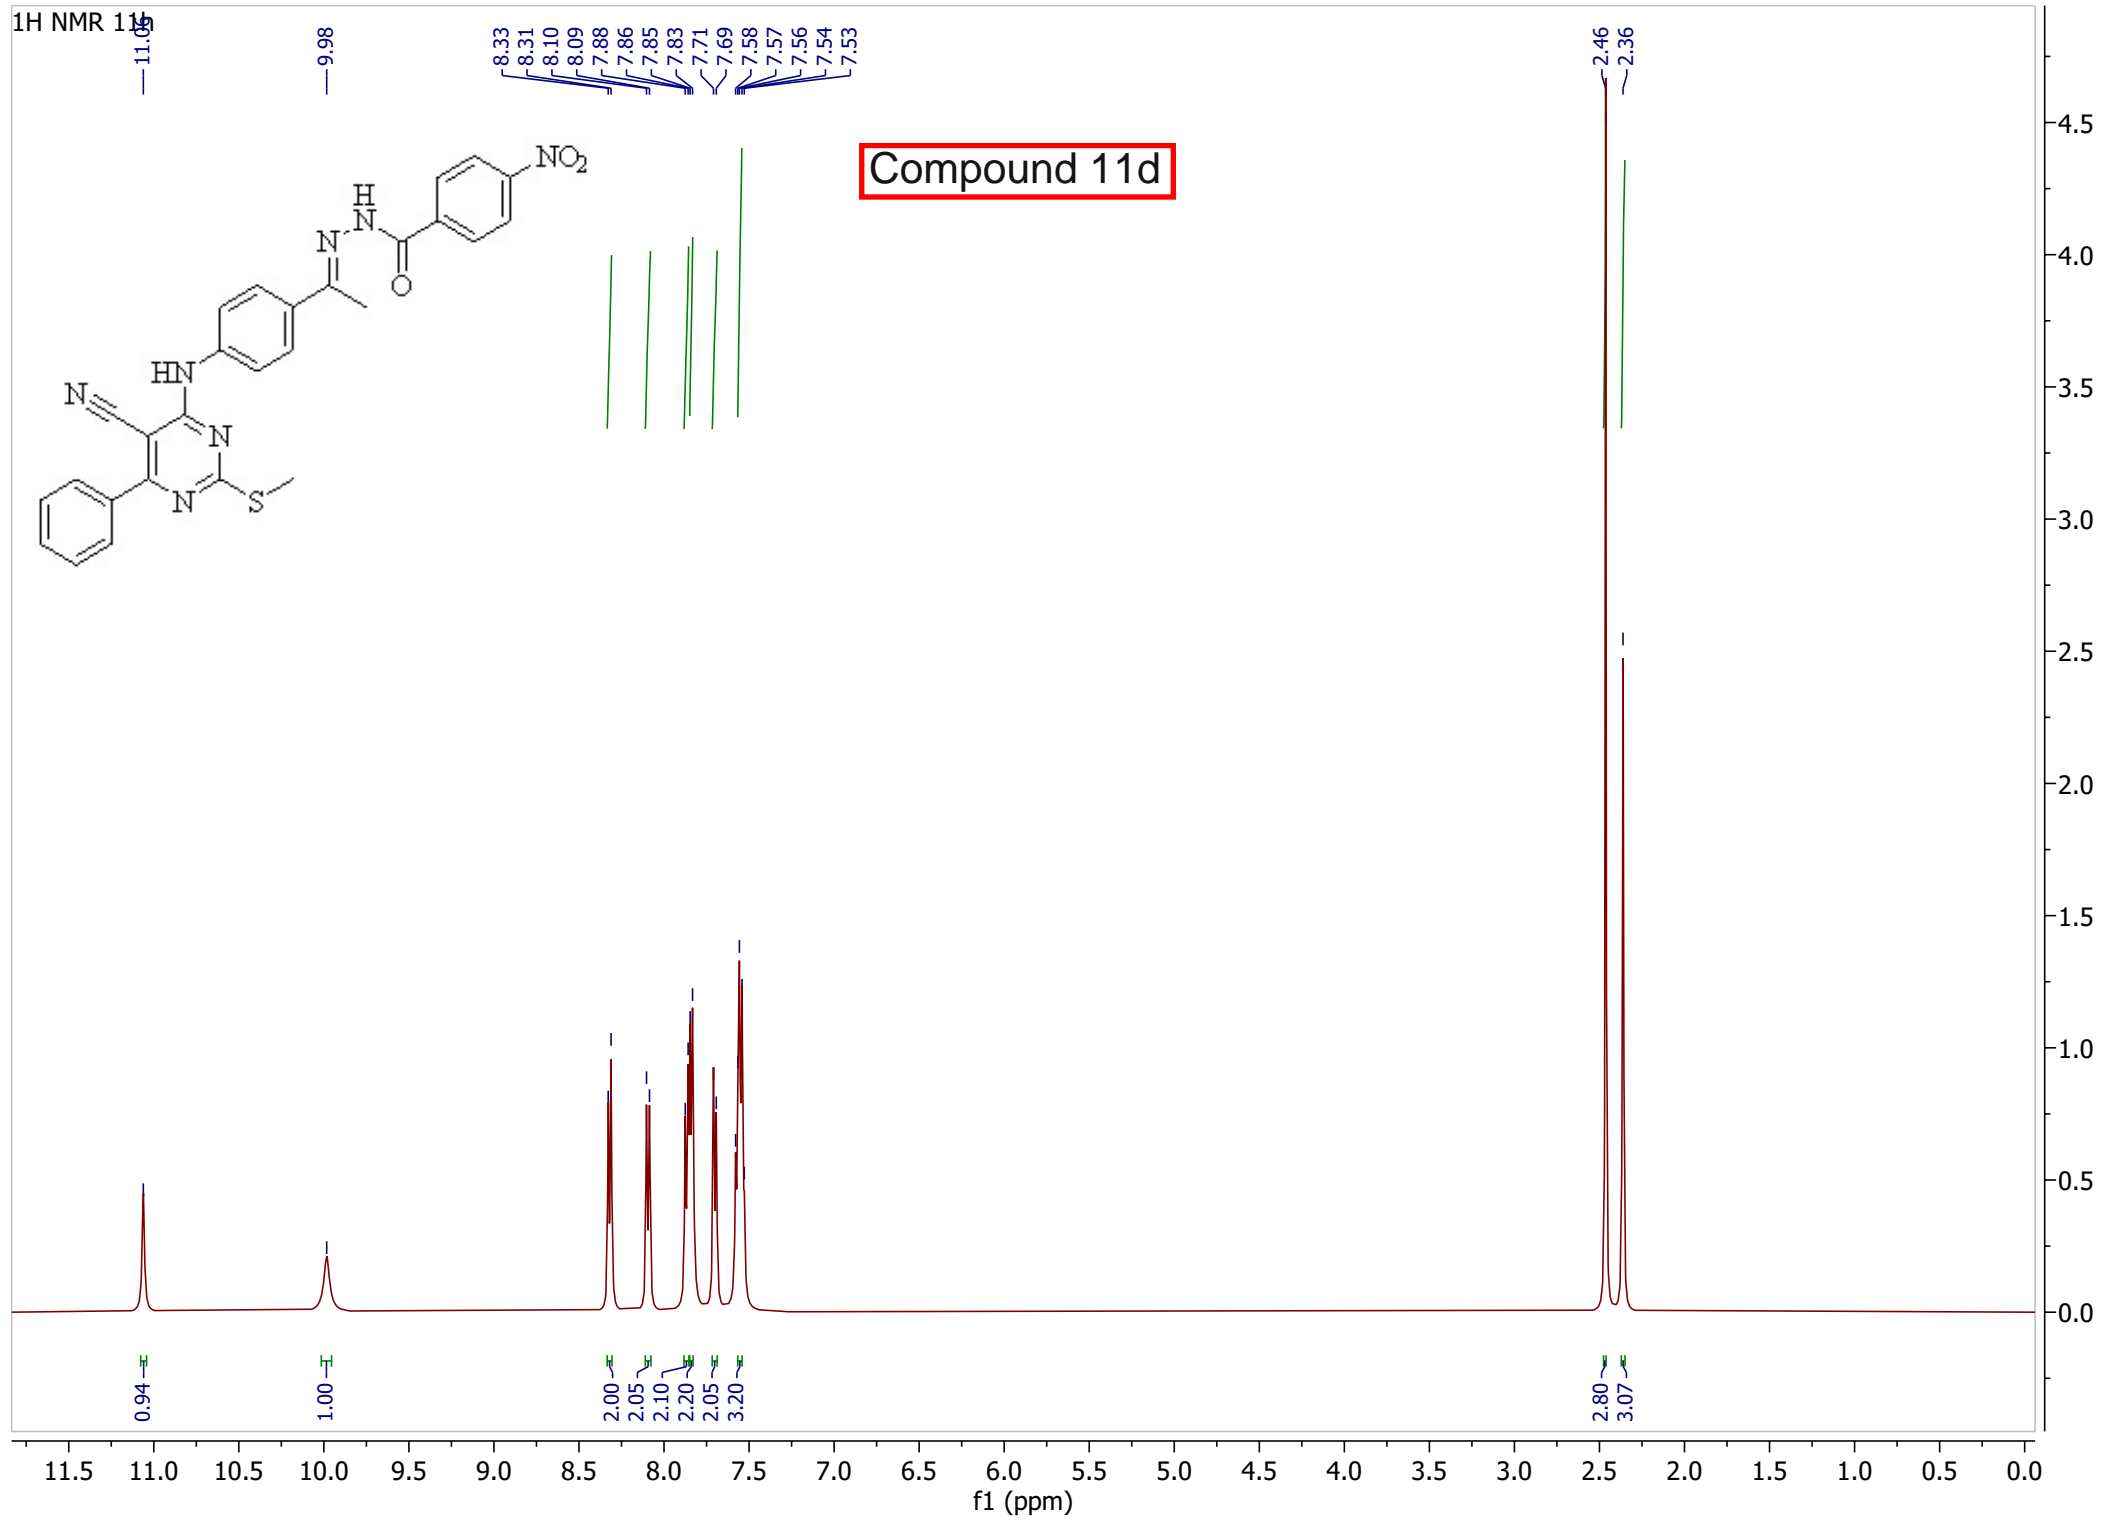

<sup>1</sup>H NMR 11h

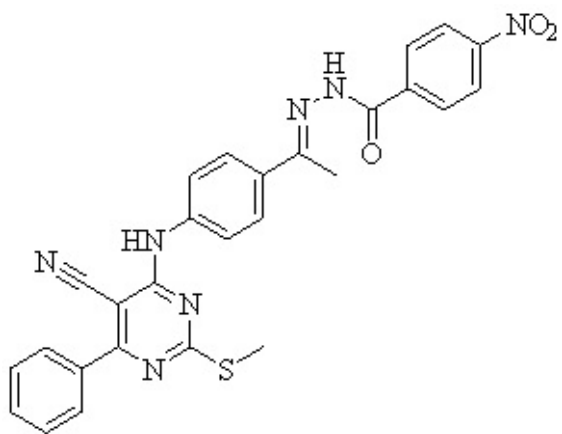

Compound 11d

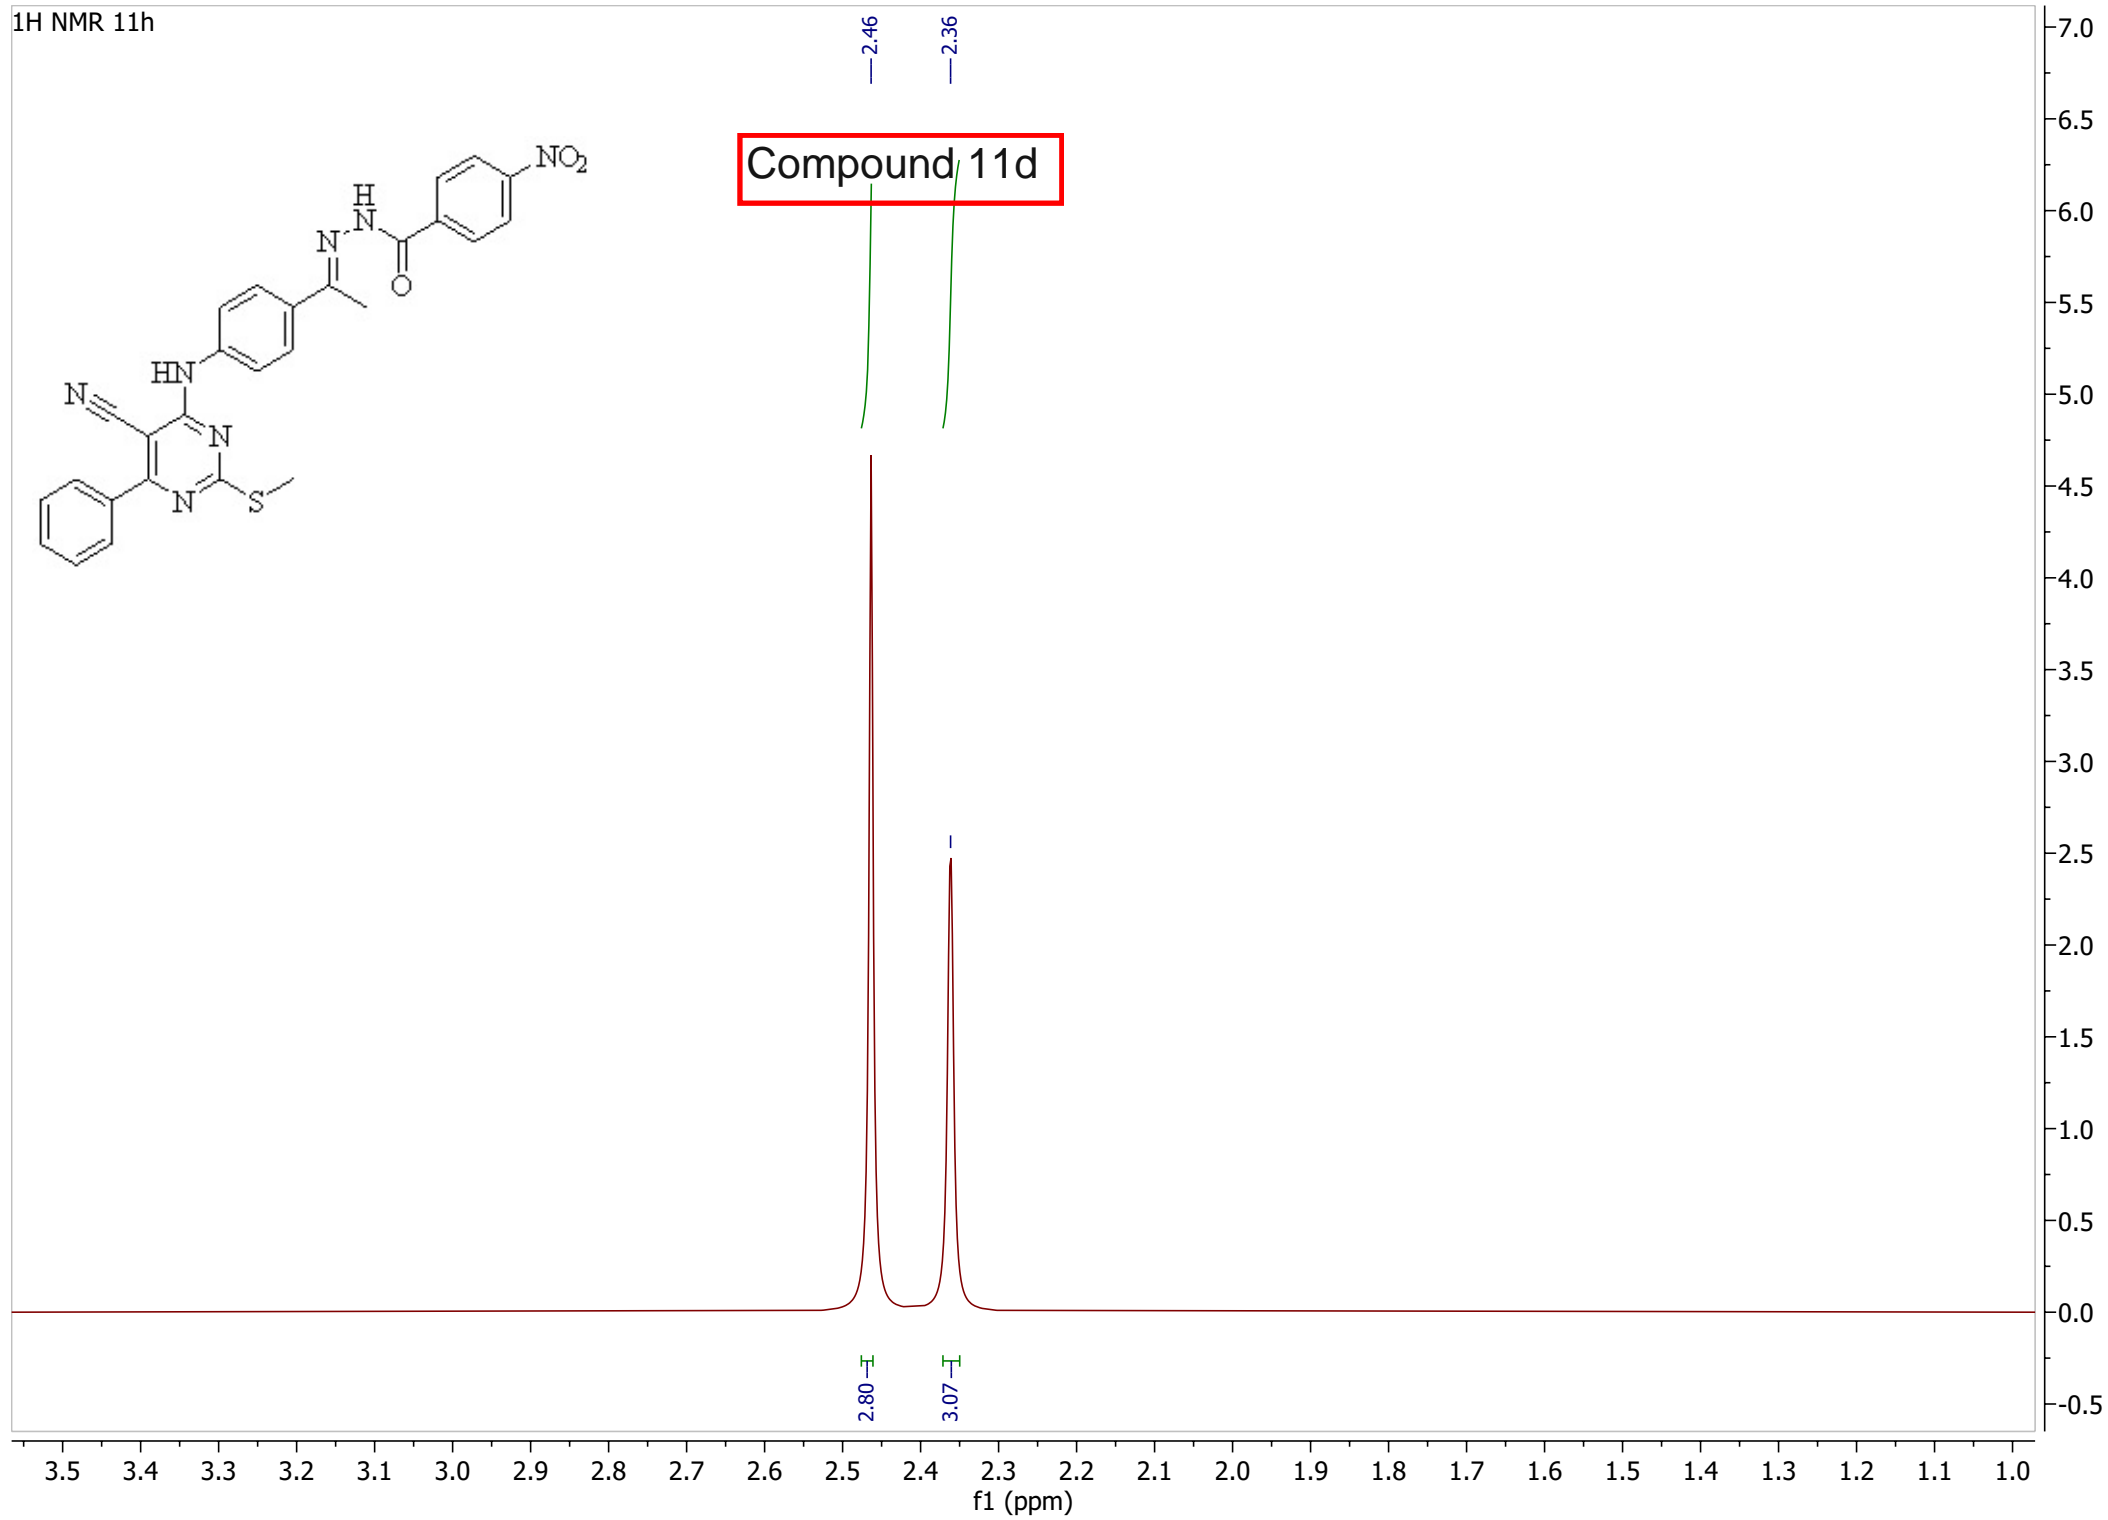

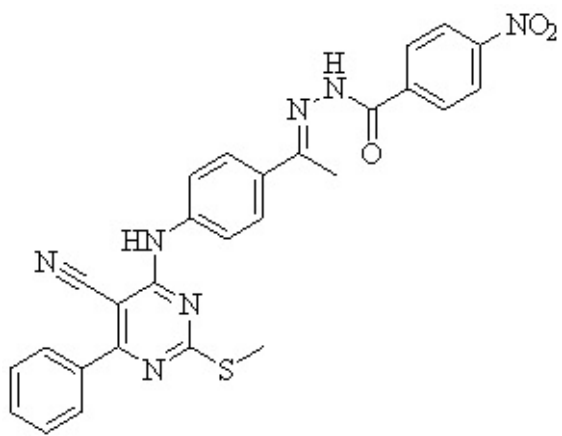

Compound 11d

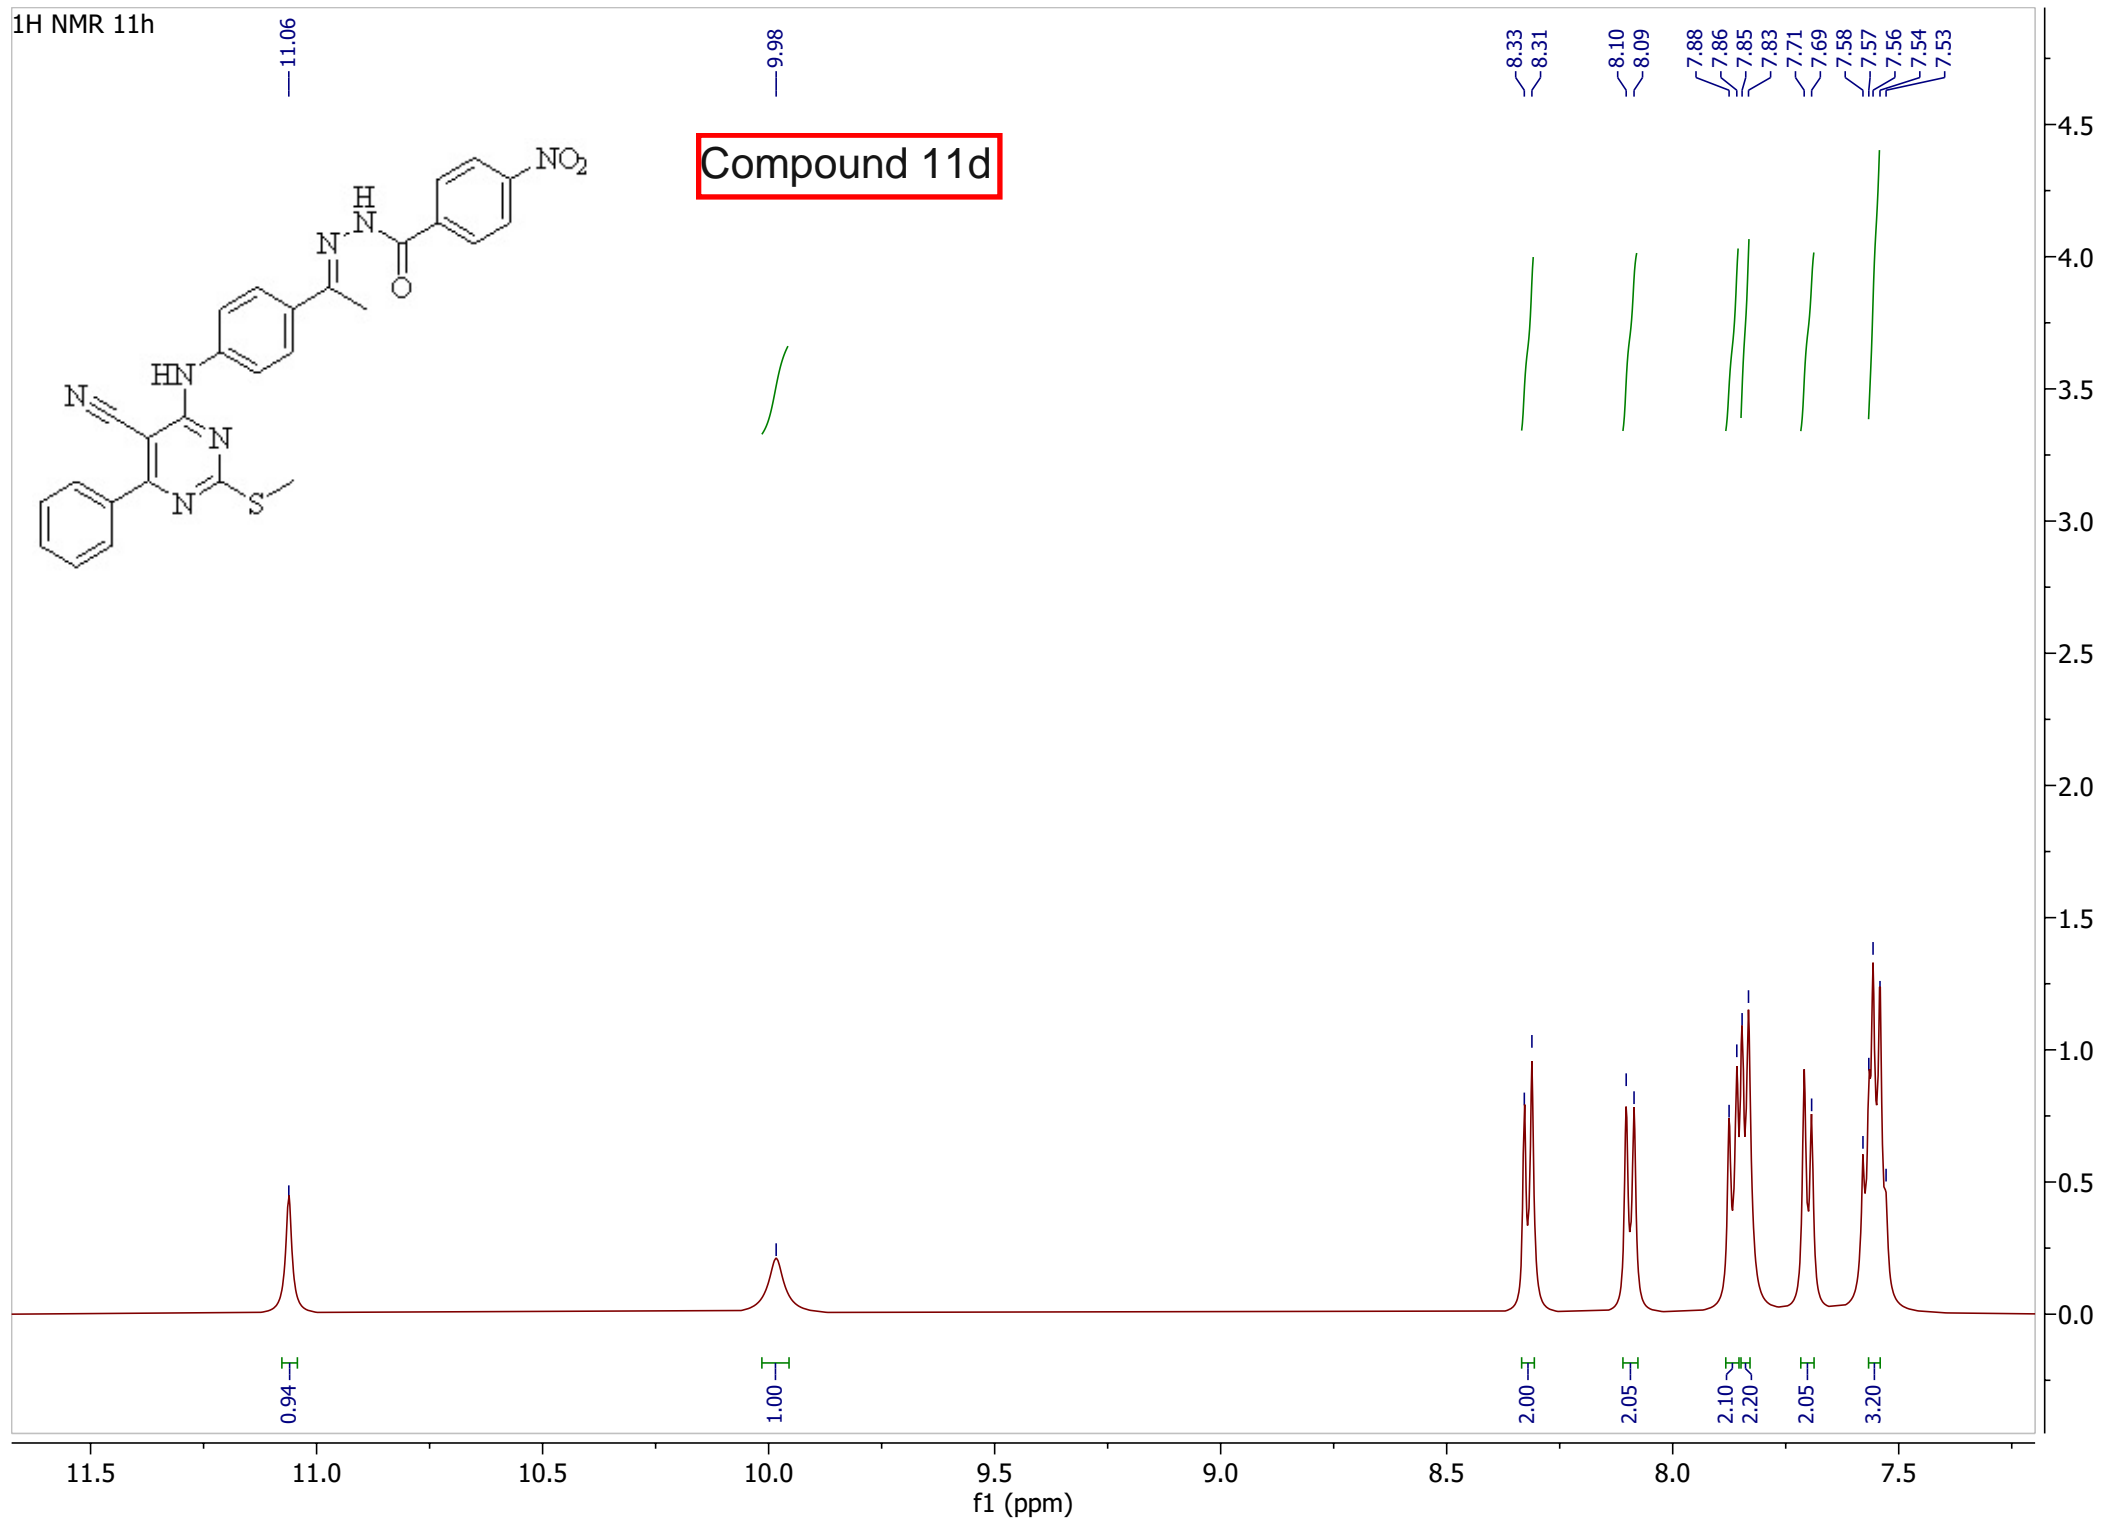



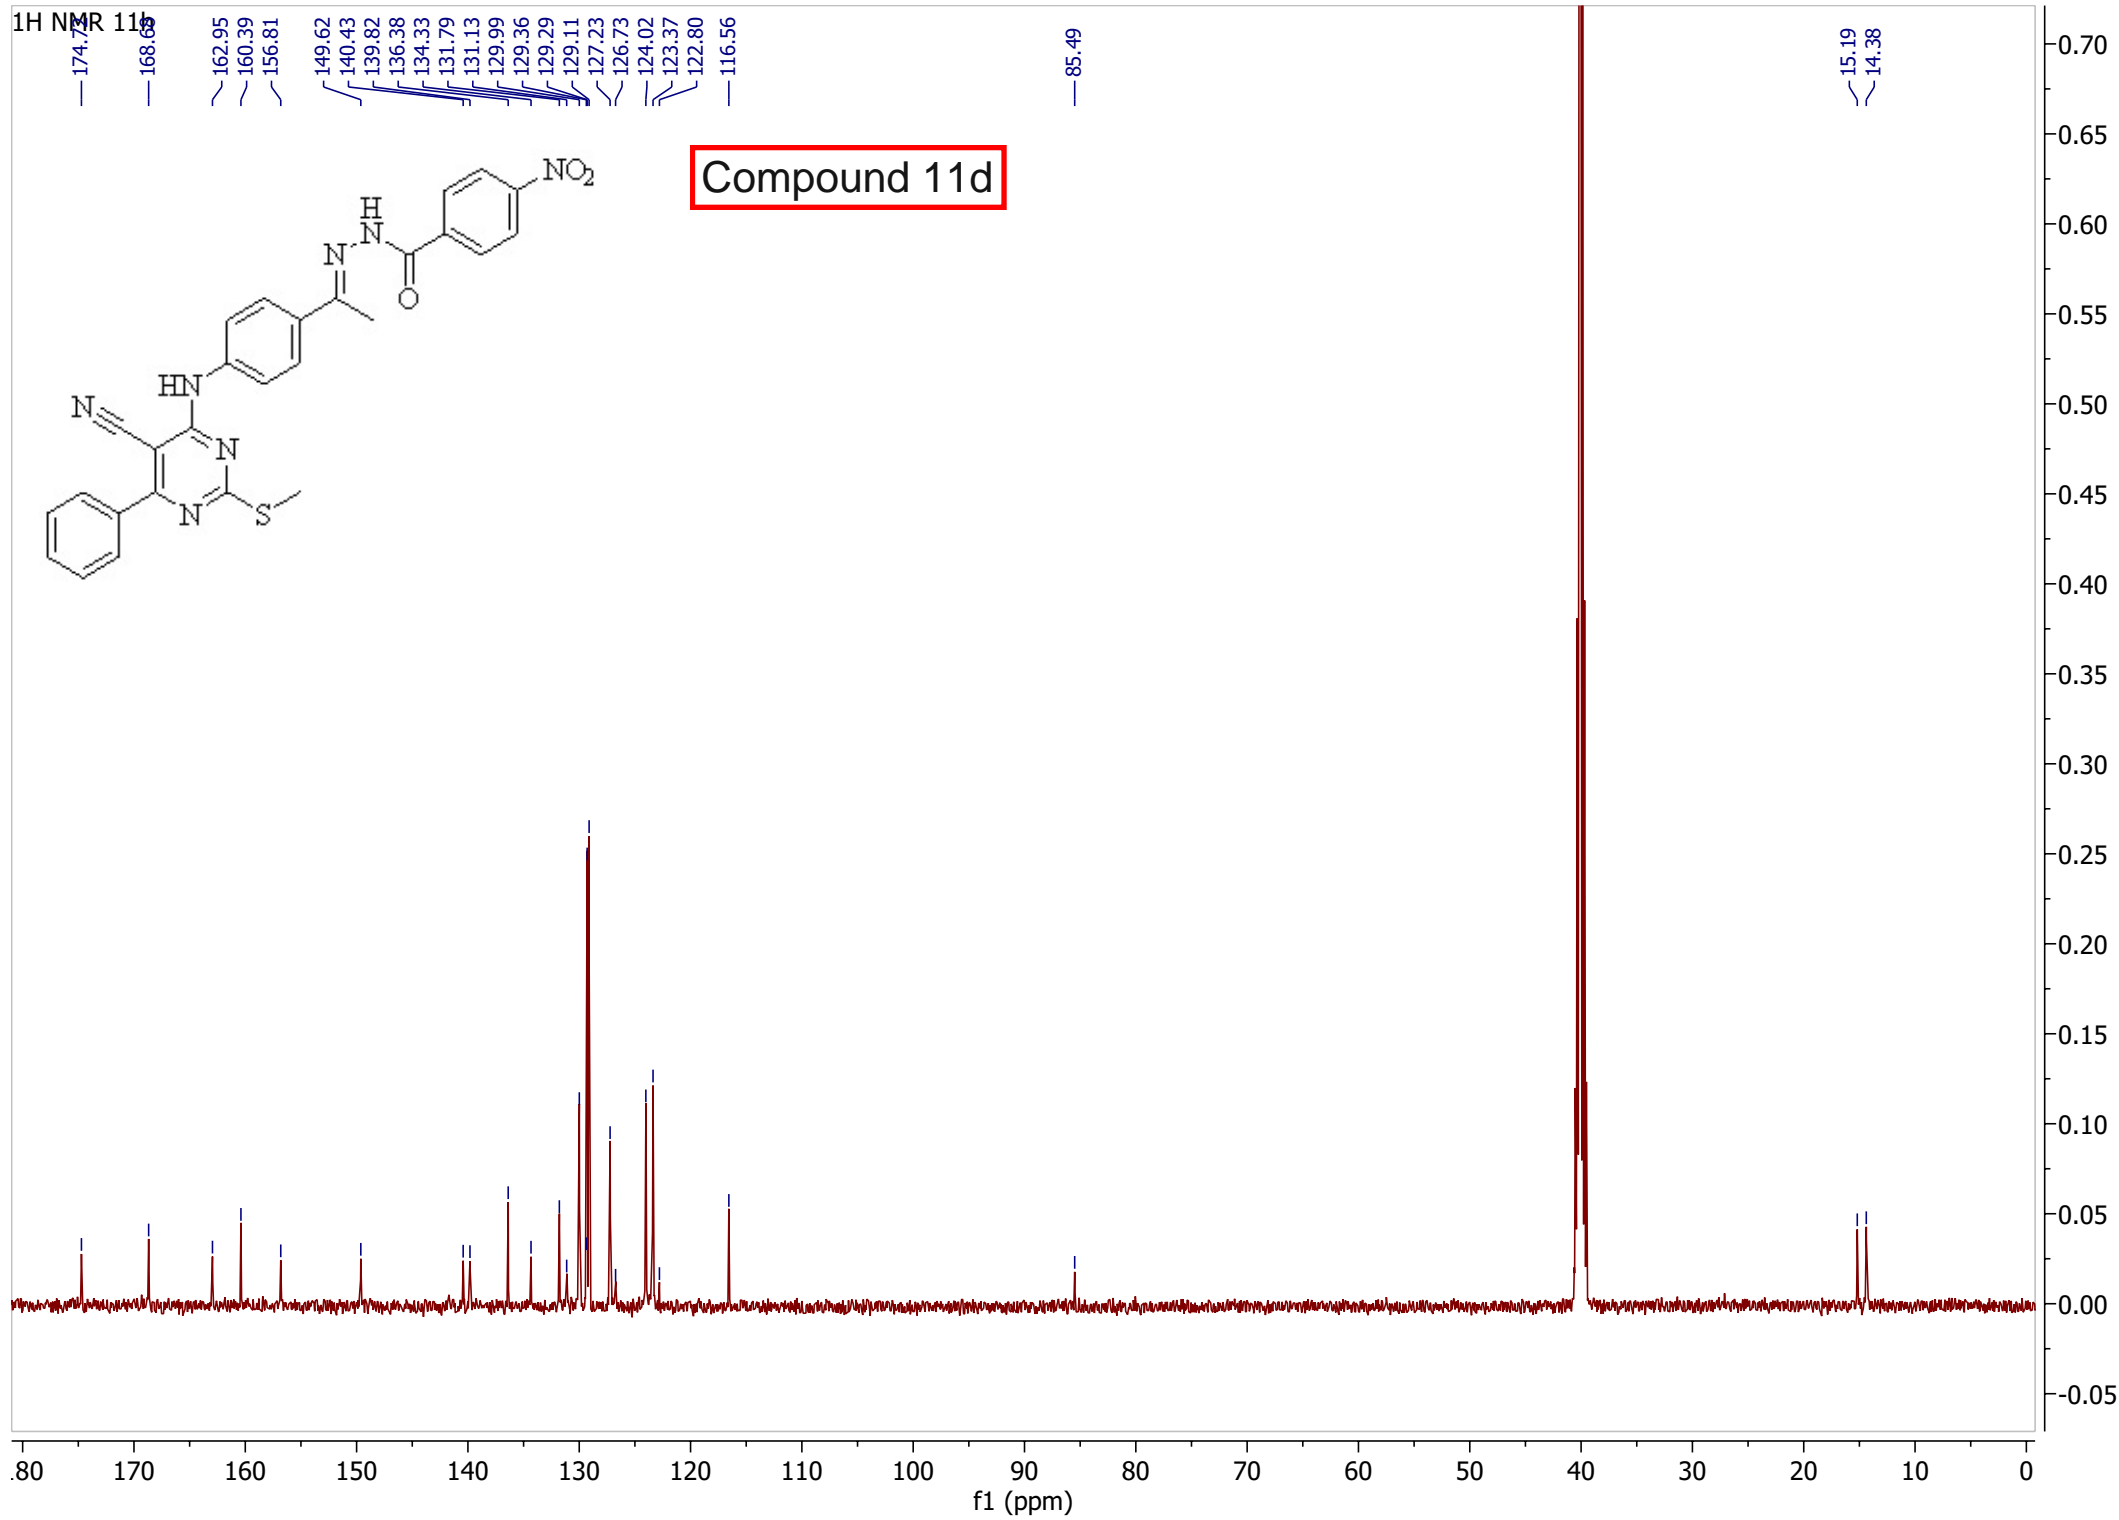



<sup>1</sup>H NMR 11h

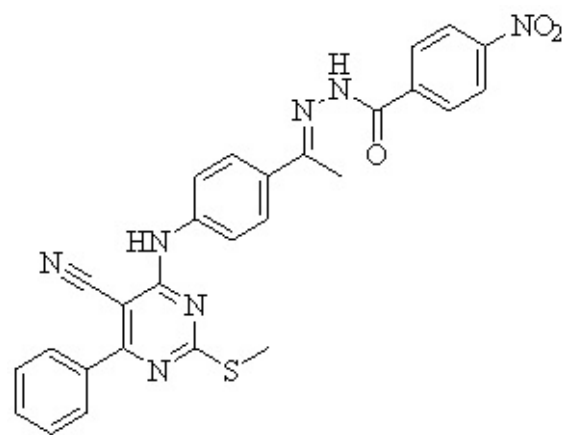

Compound 11d

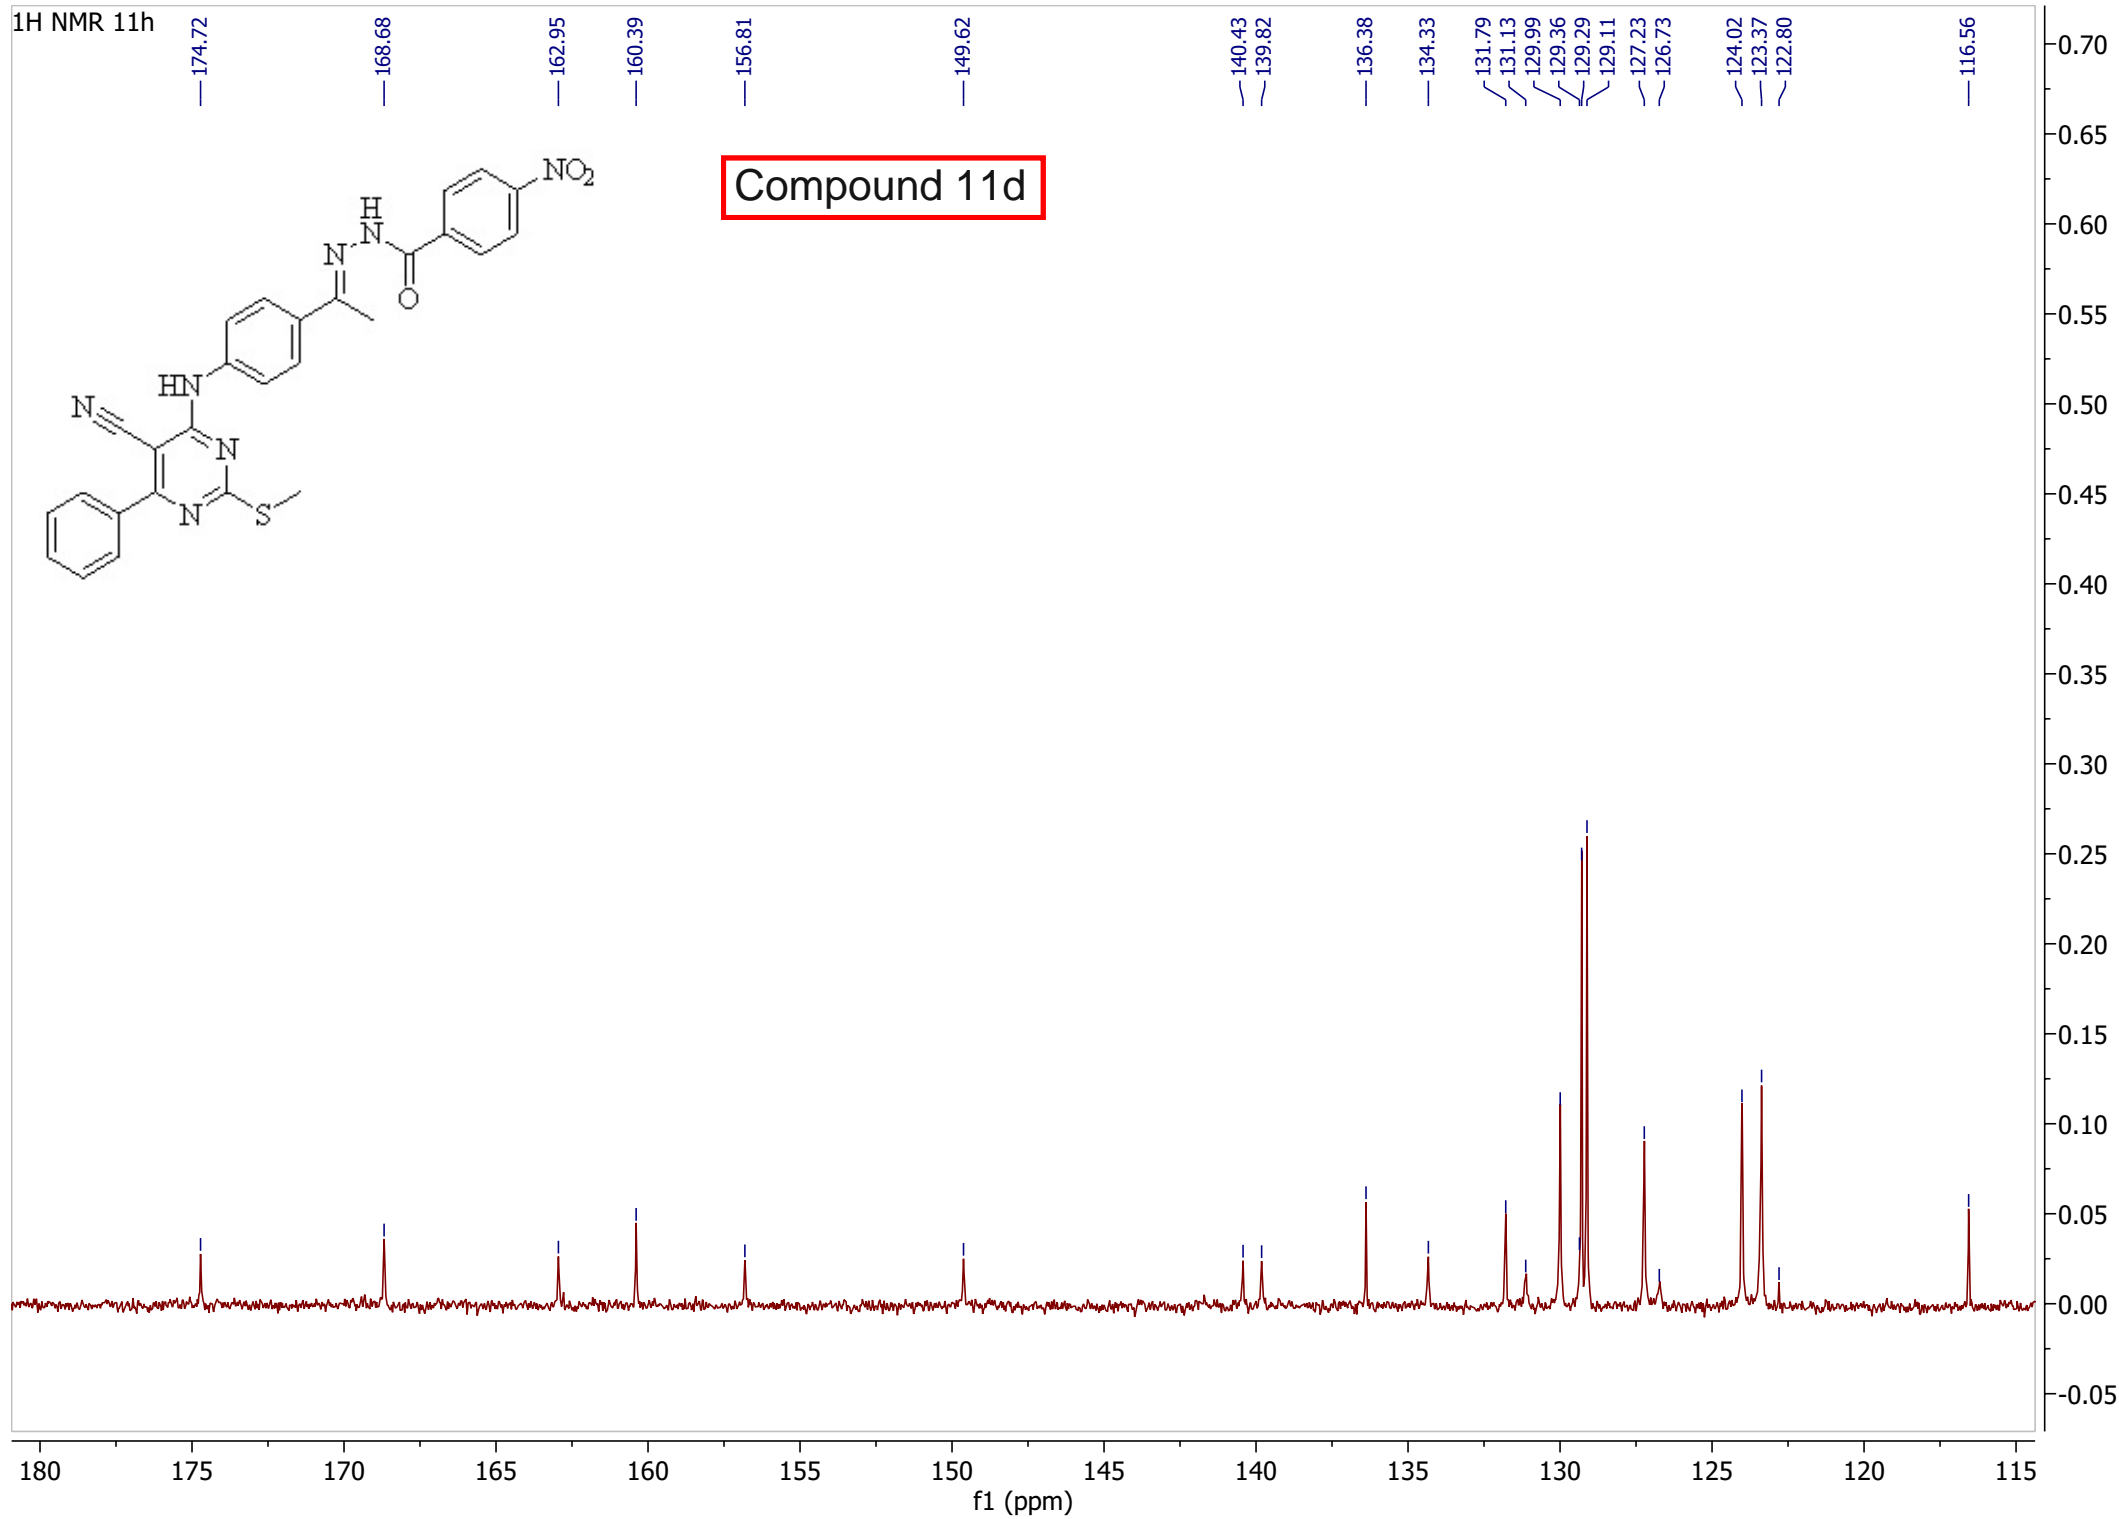

Compound 11e

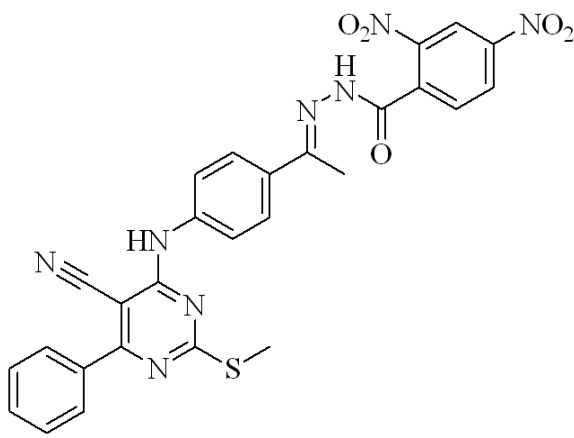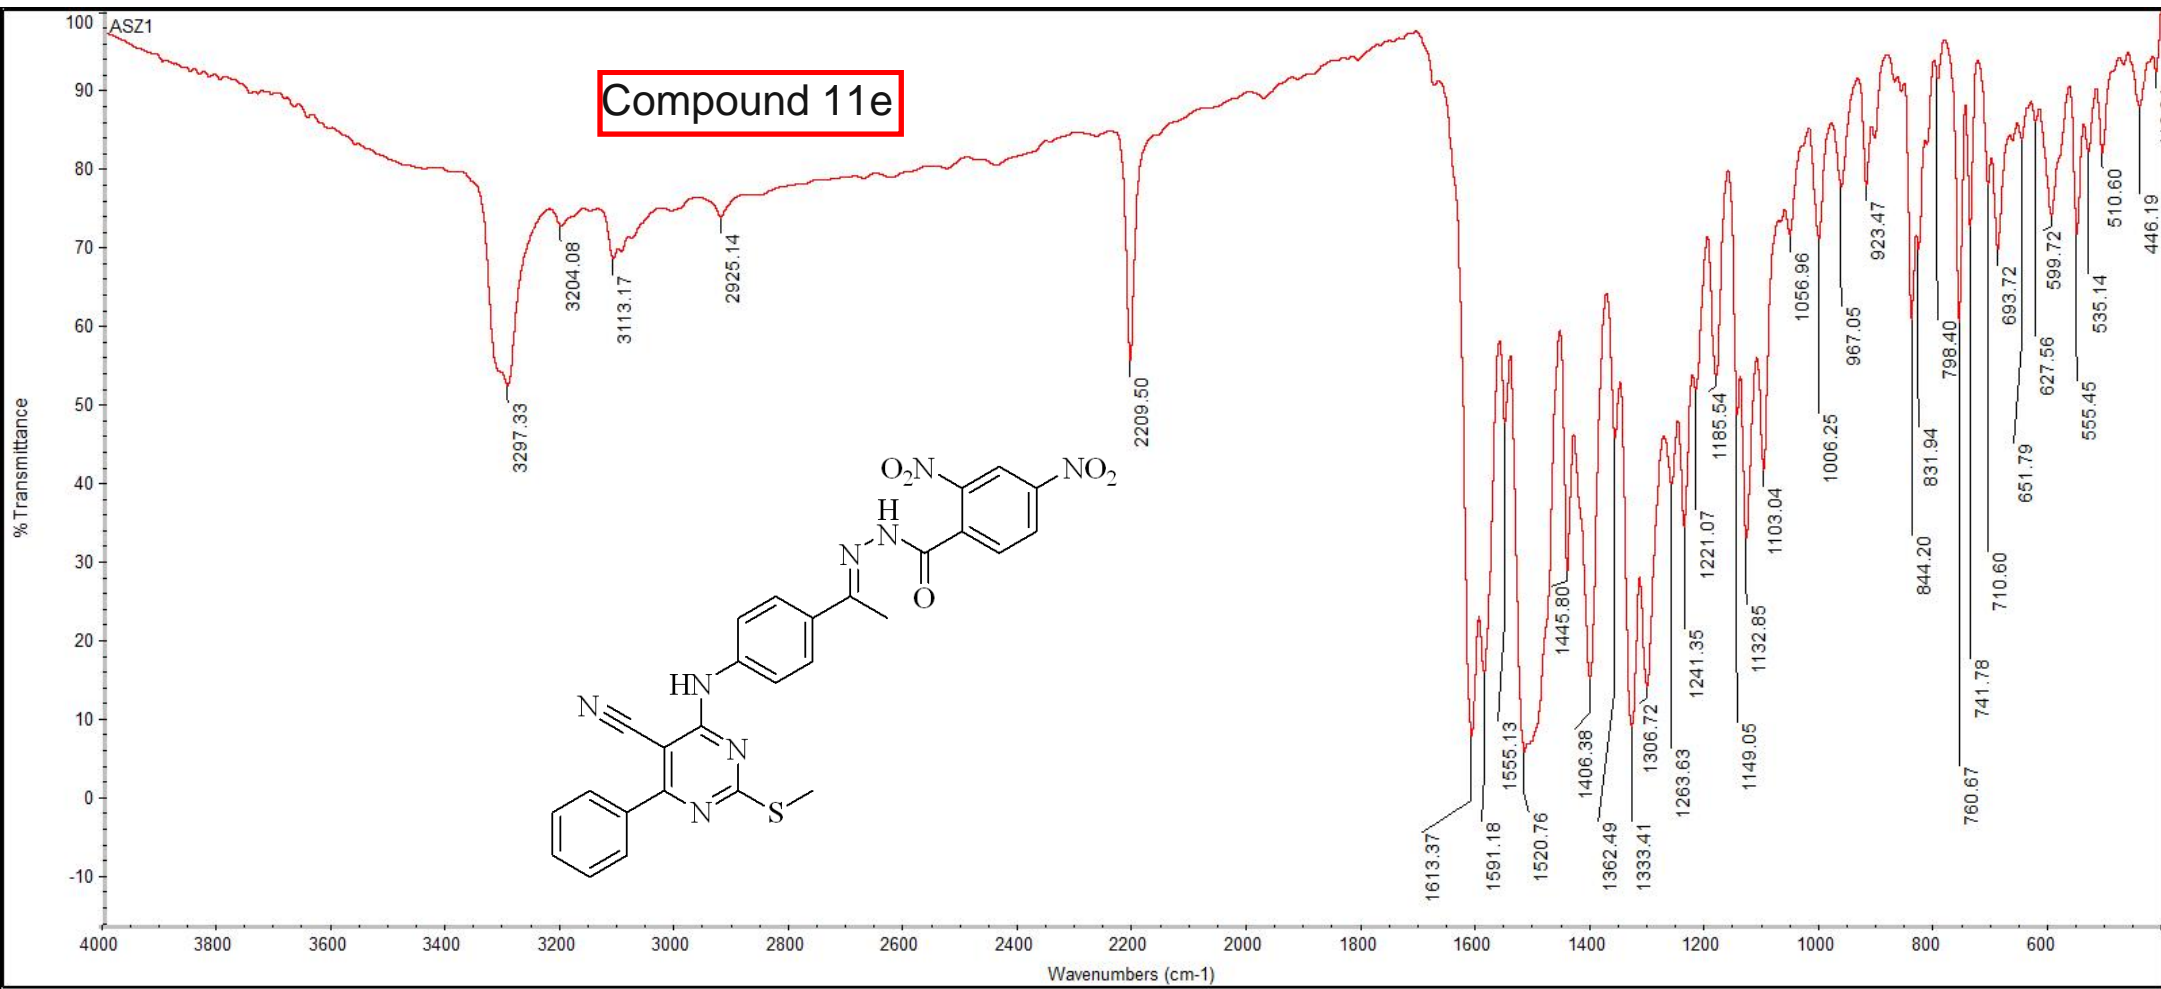

<sup>1</sup>H NMR 11h

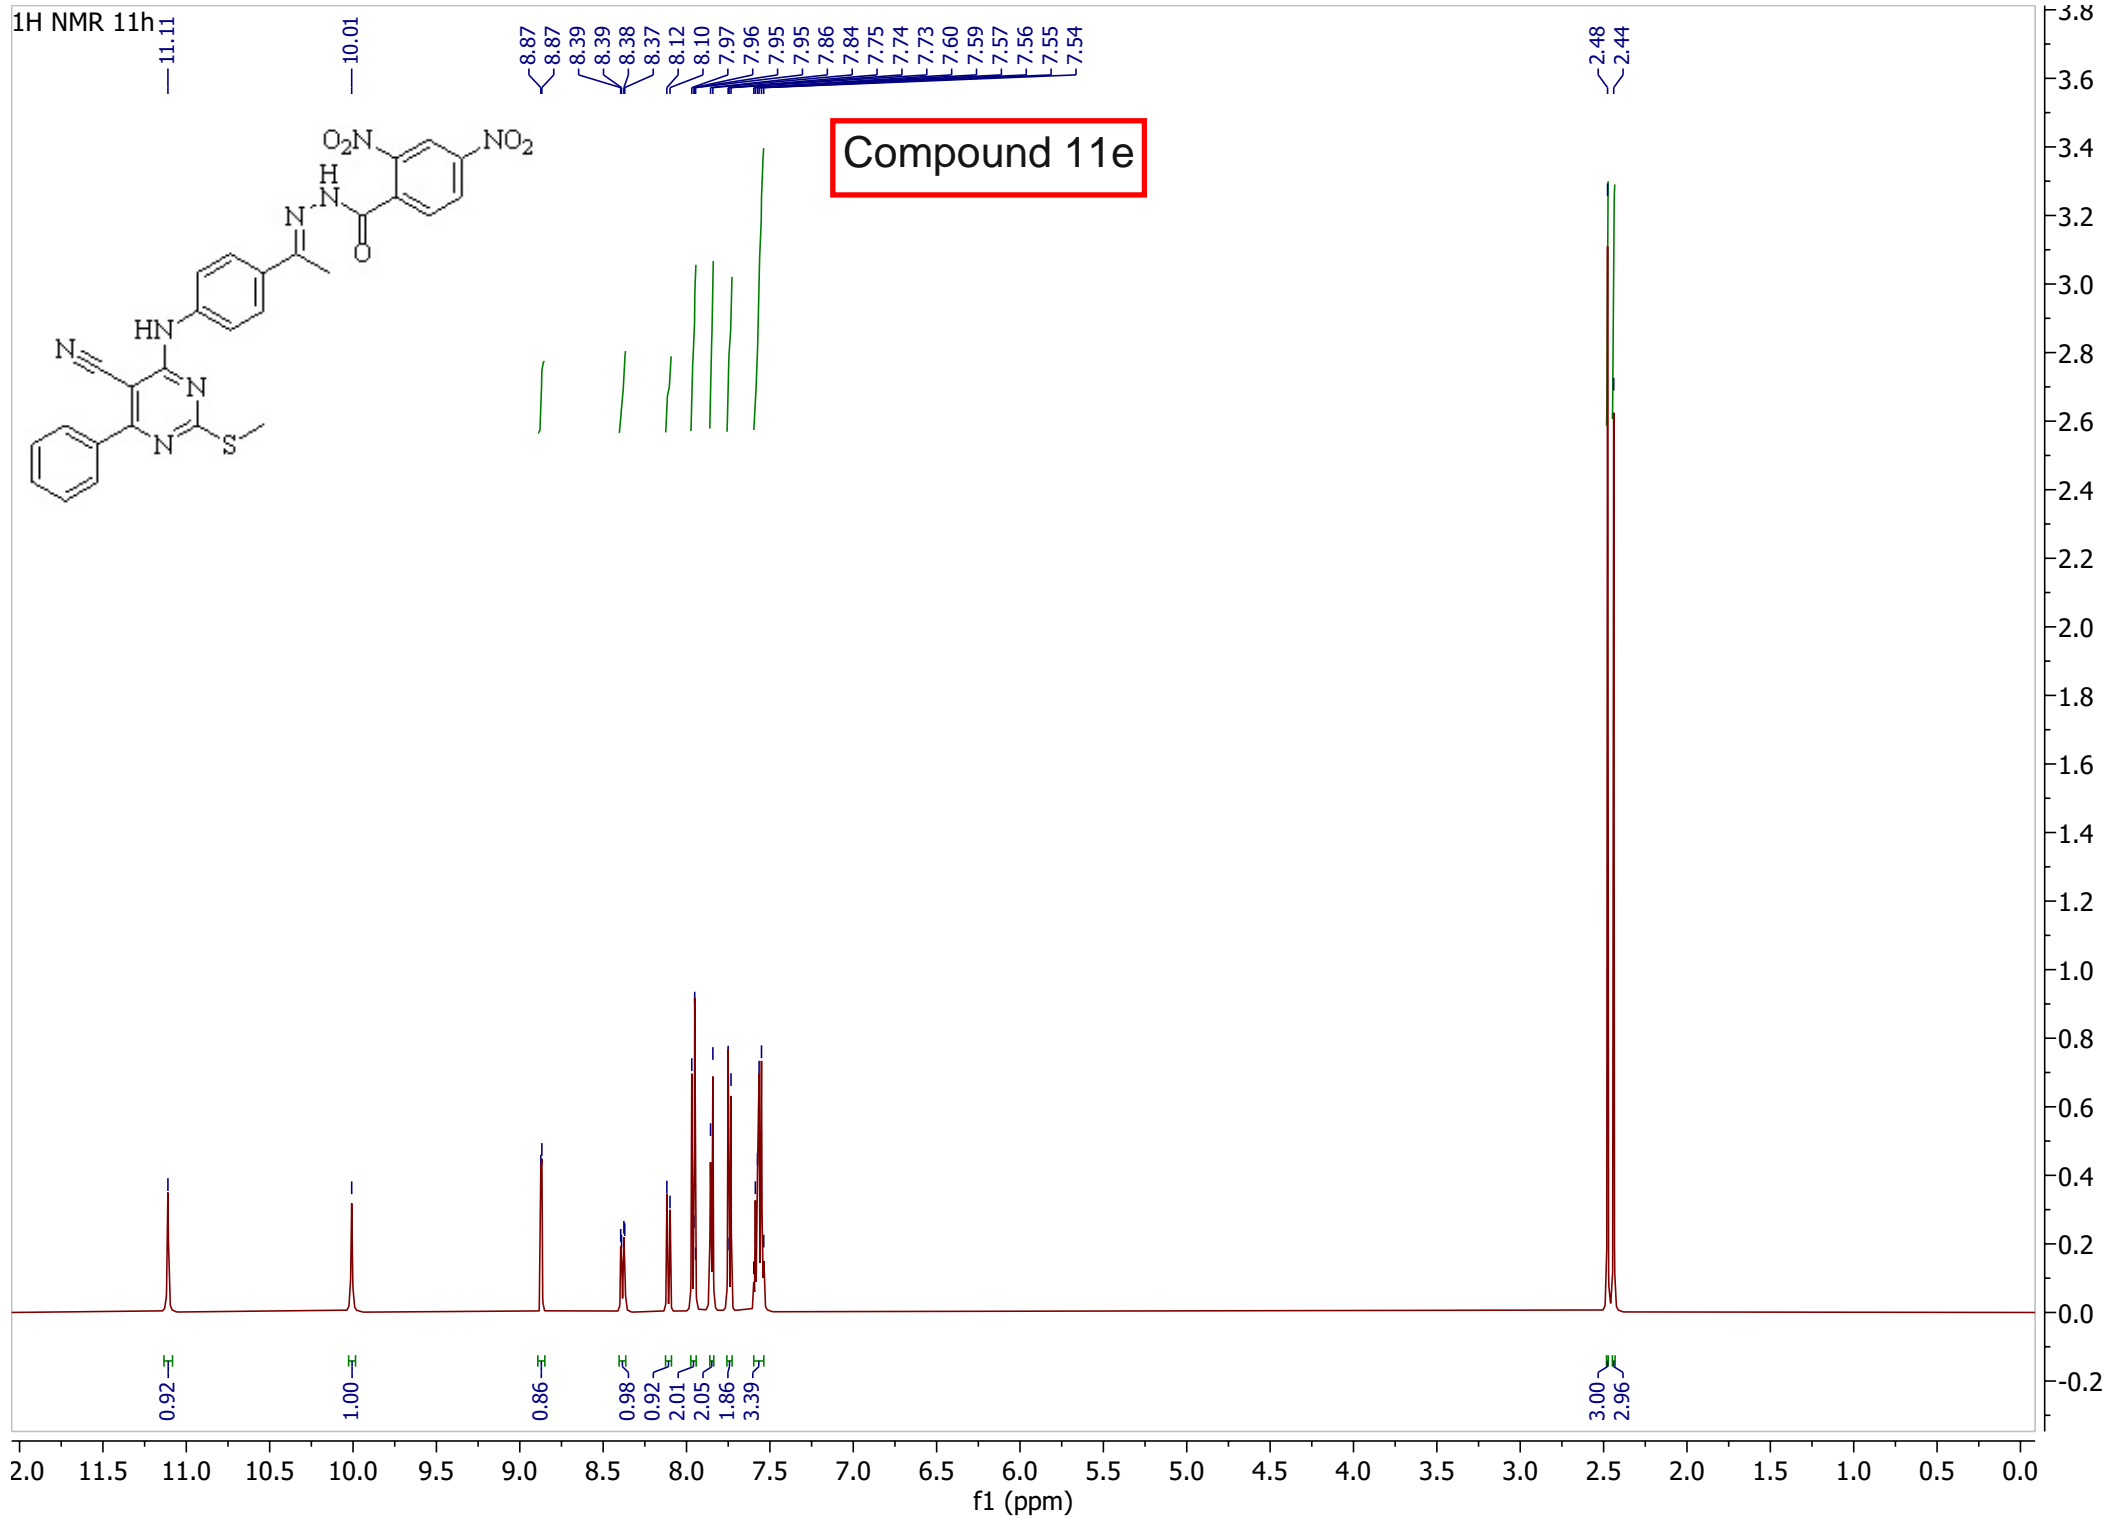

Compound 11e

<sup>1</sup>H NMR 11h

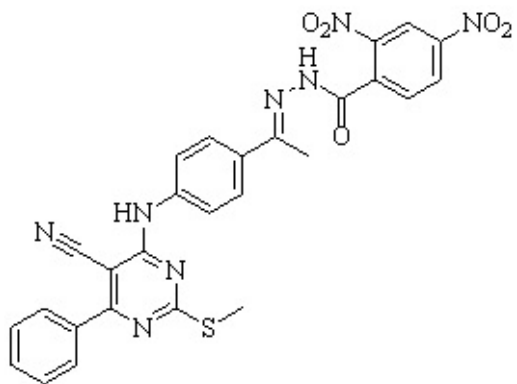

Compound 11e

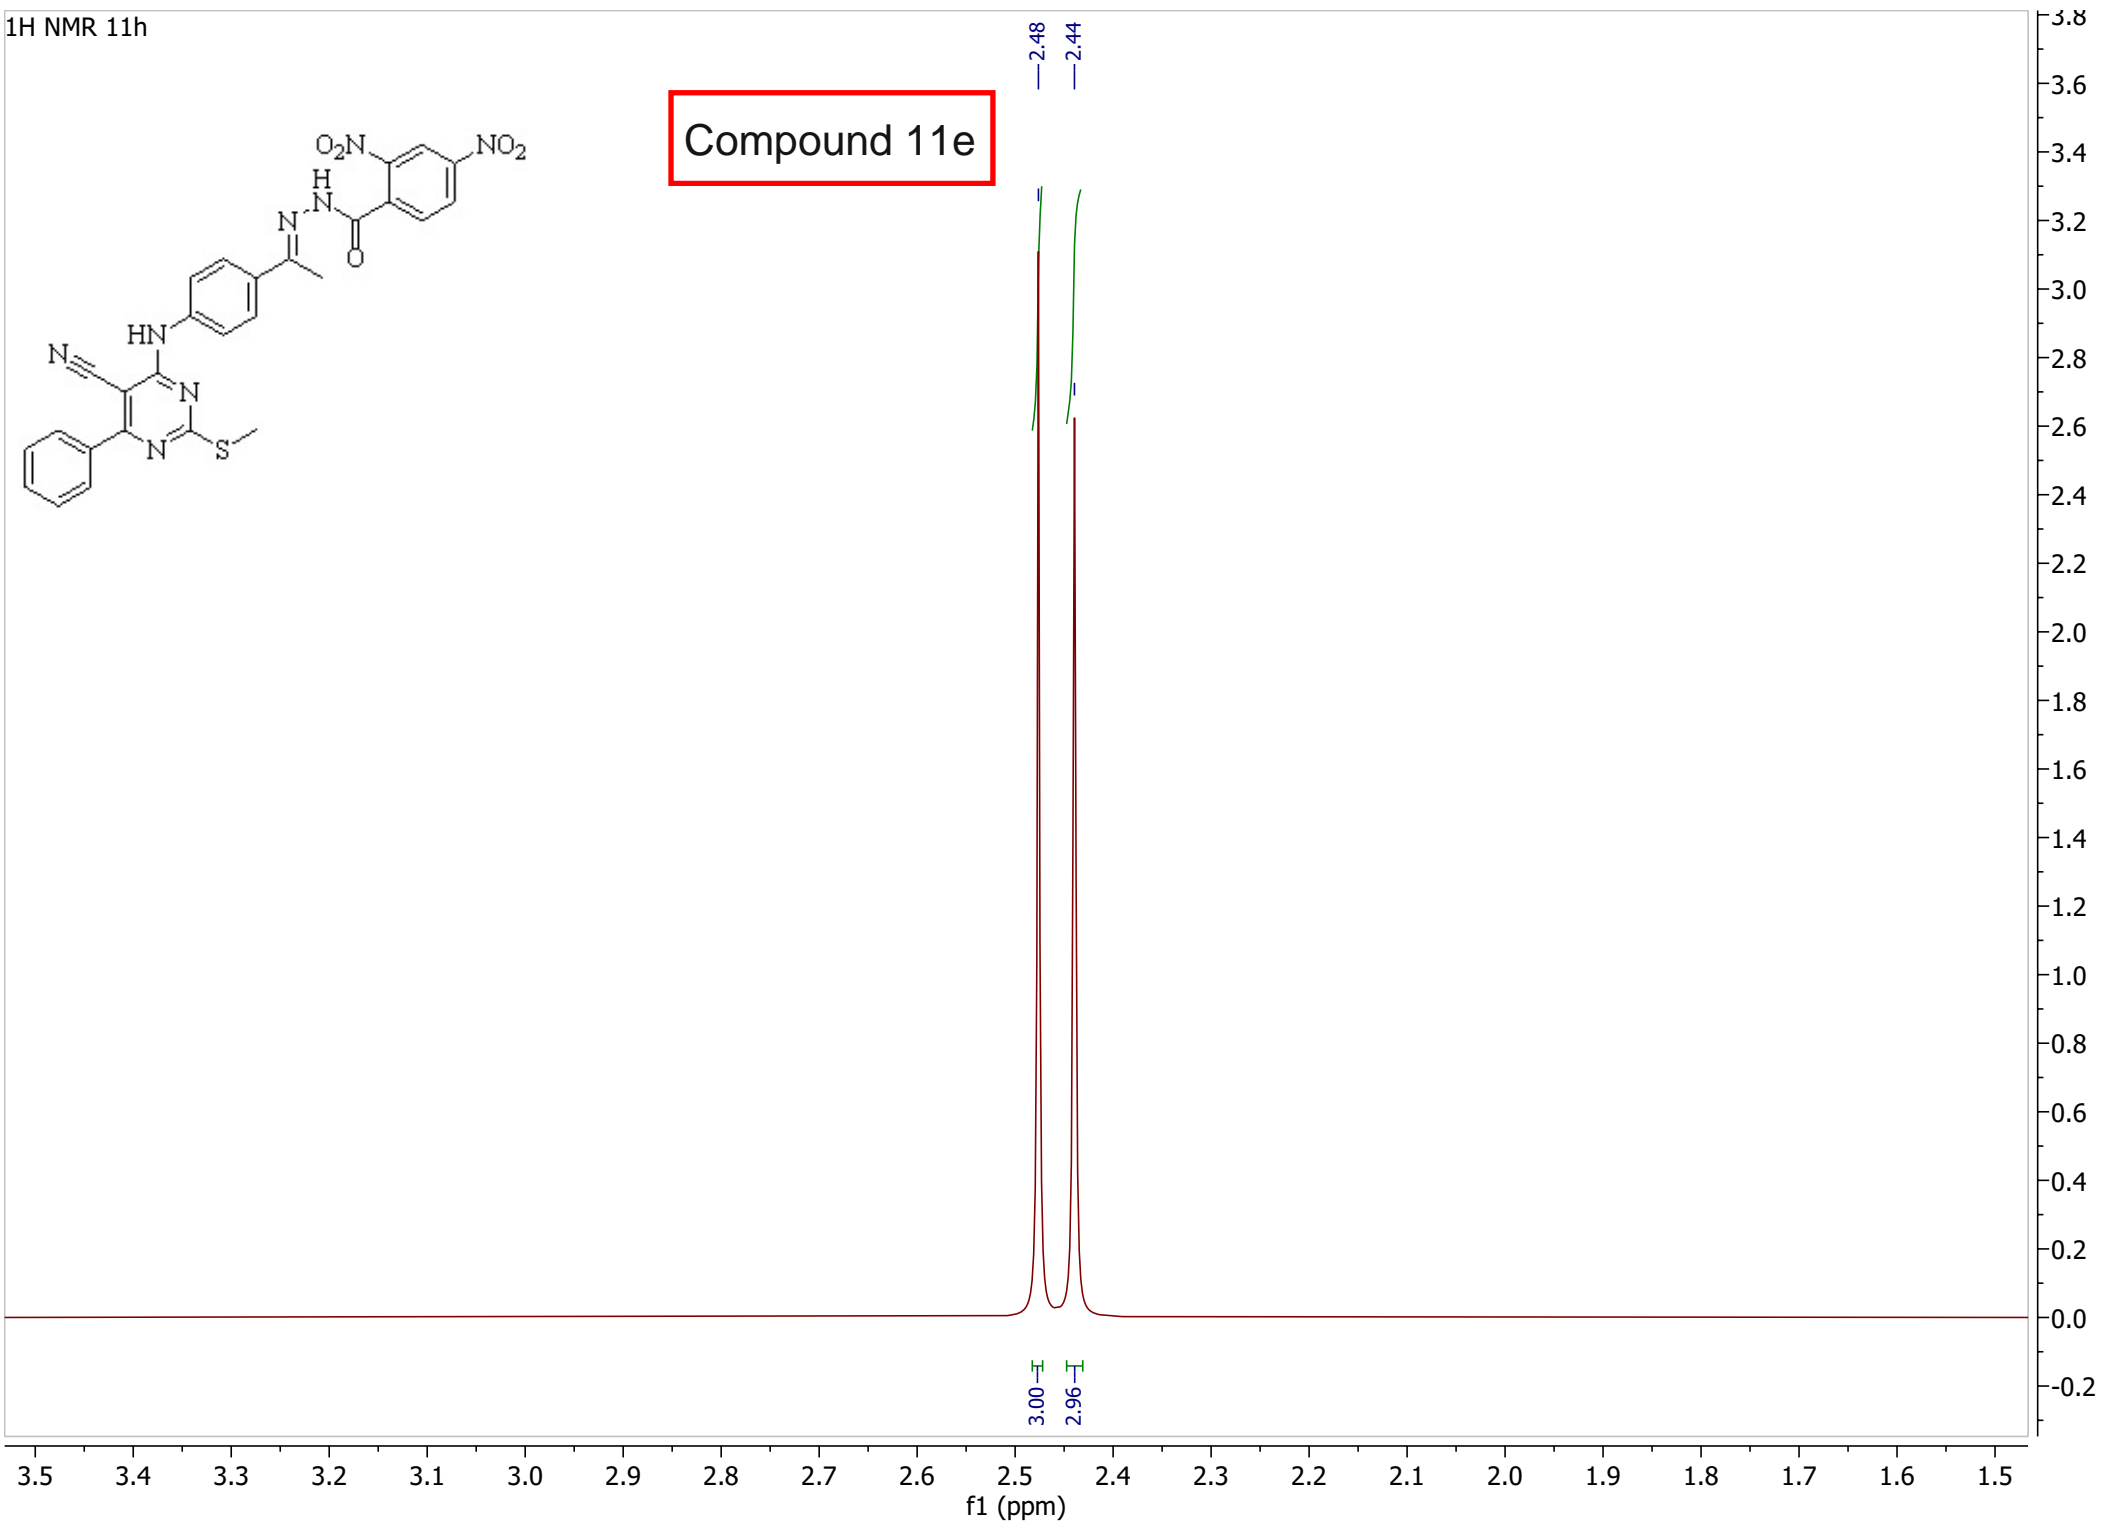

<sup>1</sup>H NMR 11h

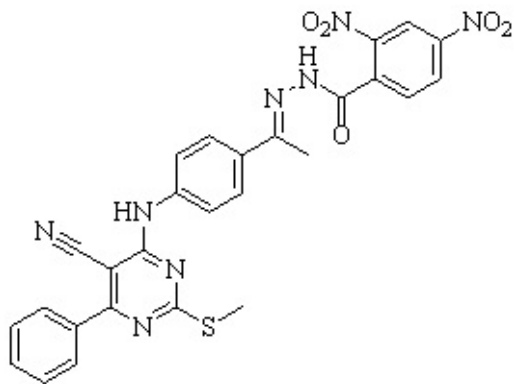

Compound 11e

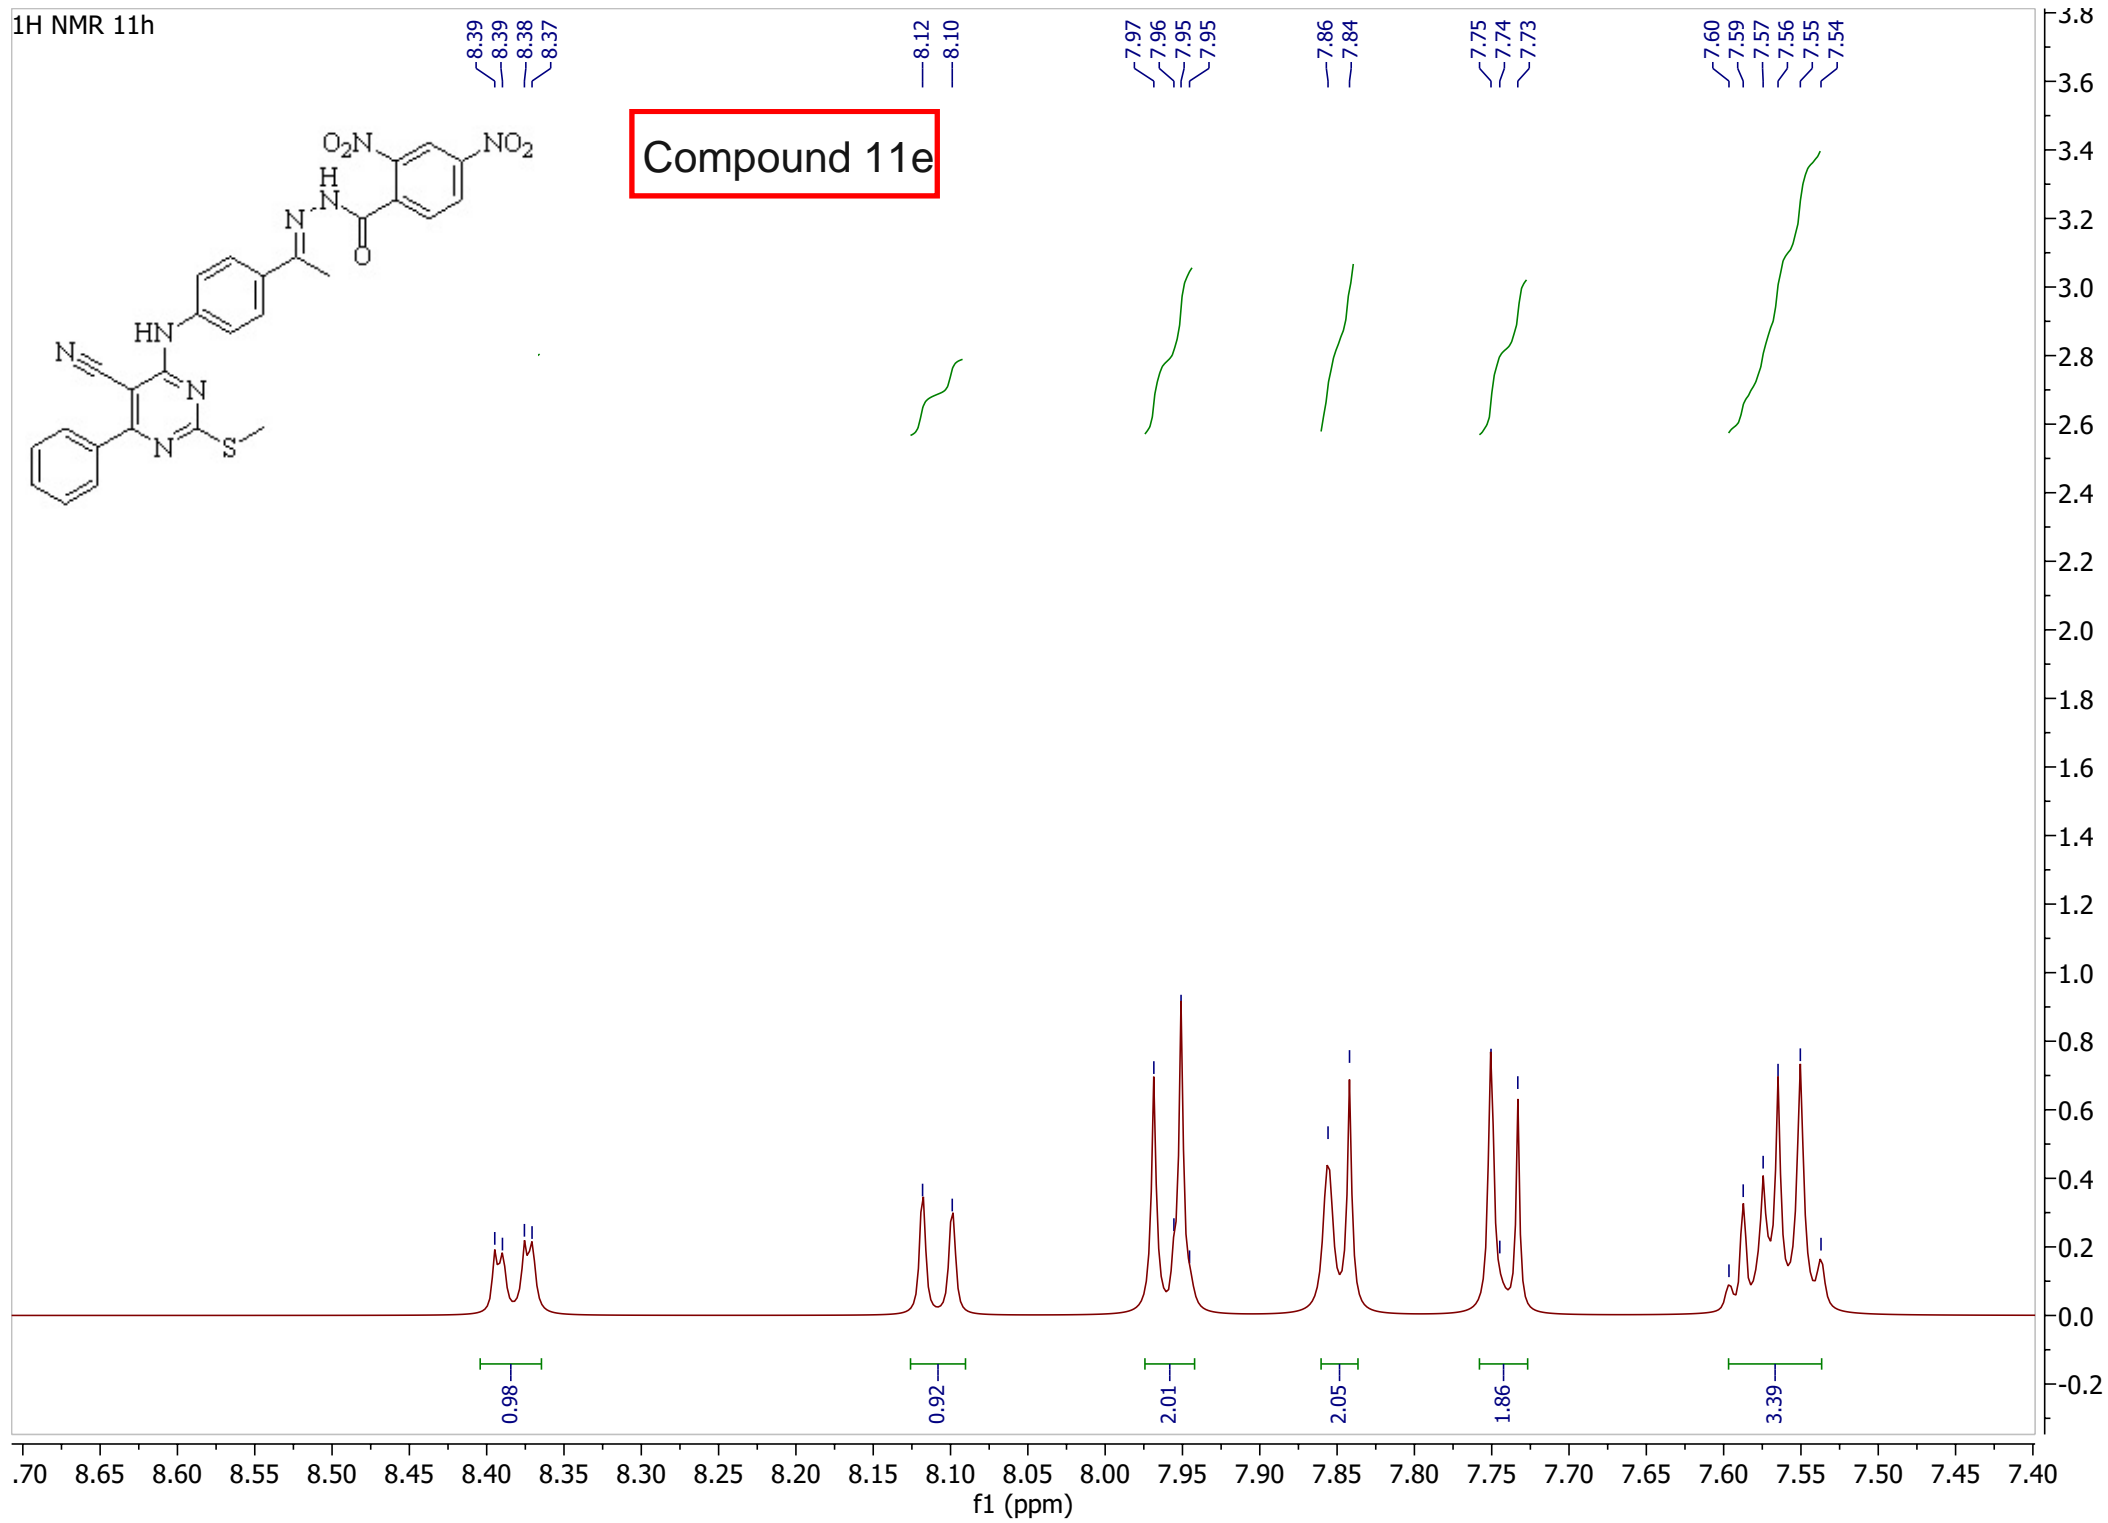

<sup>1</sup>H NMR 11h

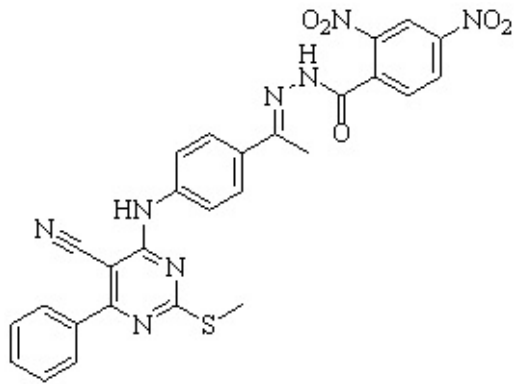

Compound 11e

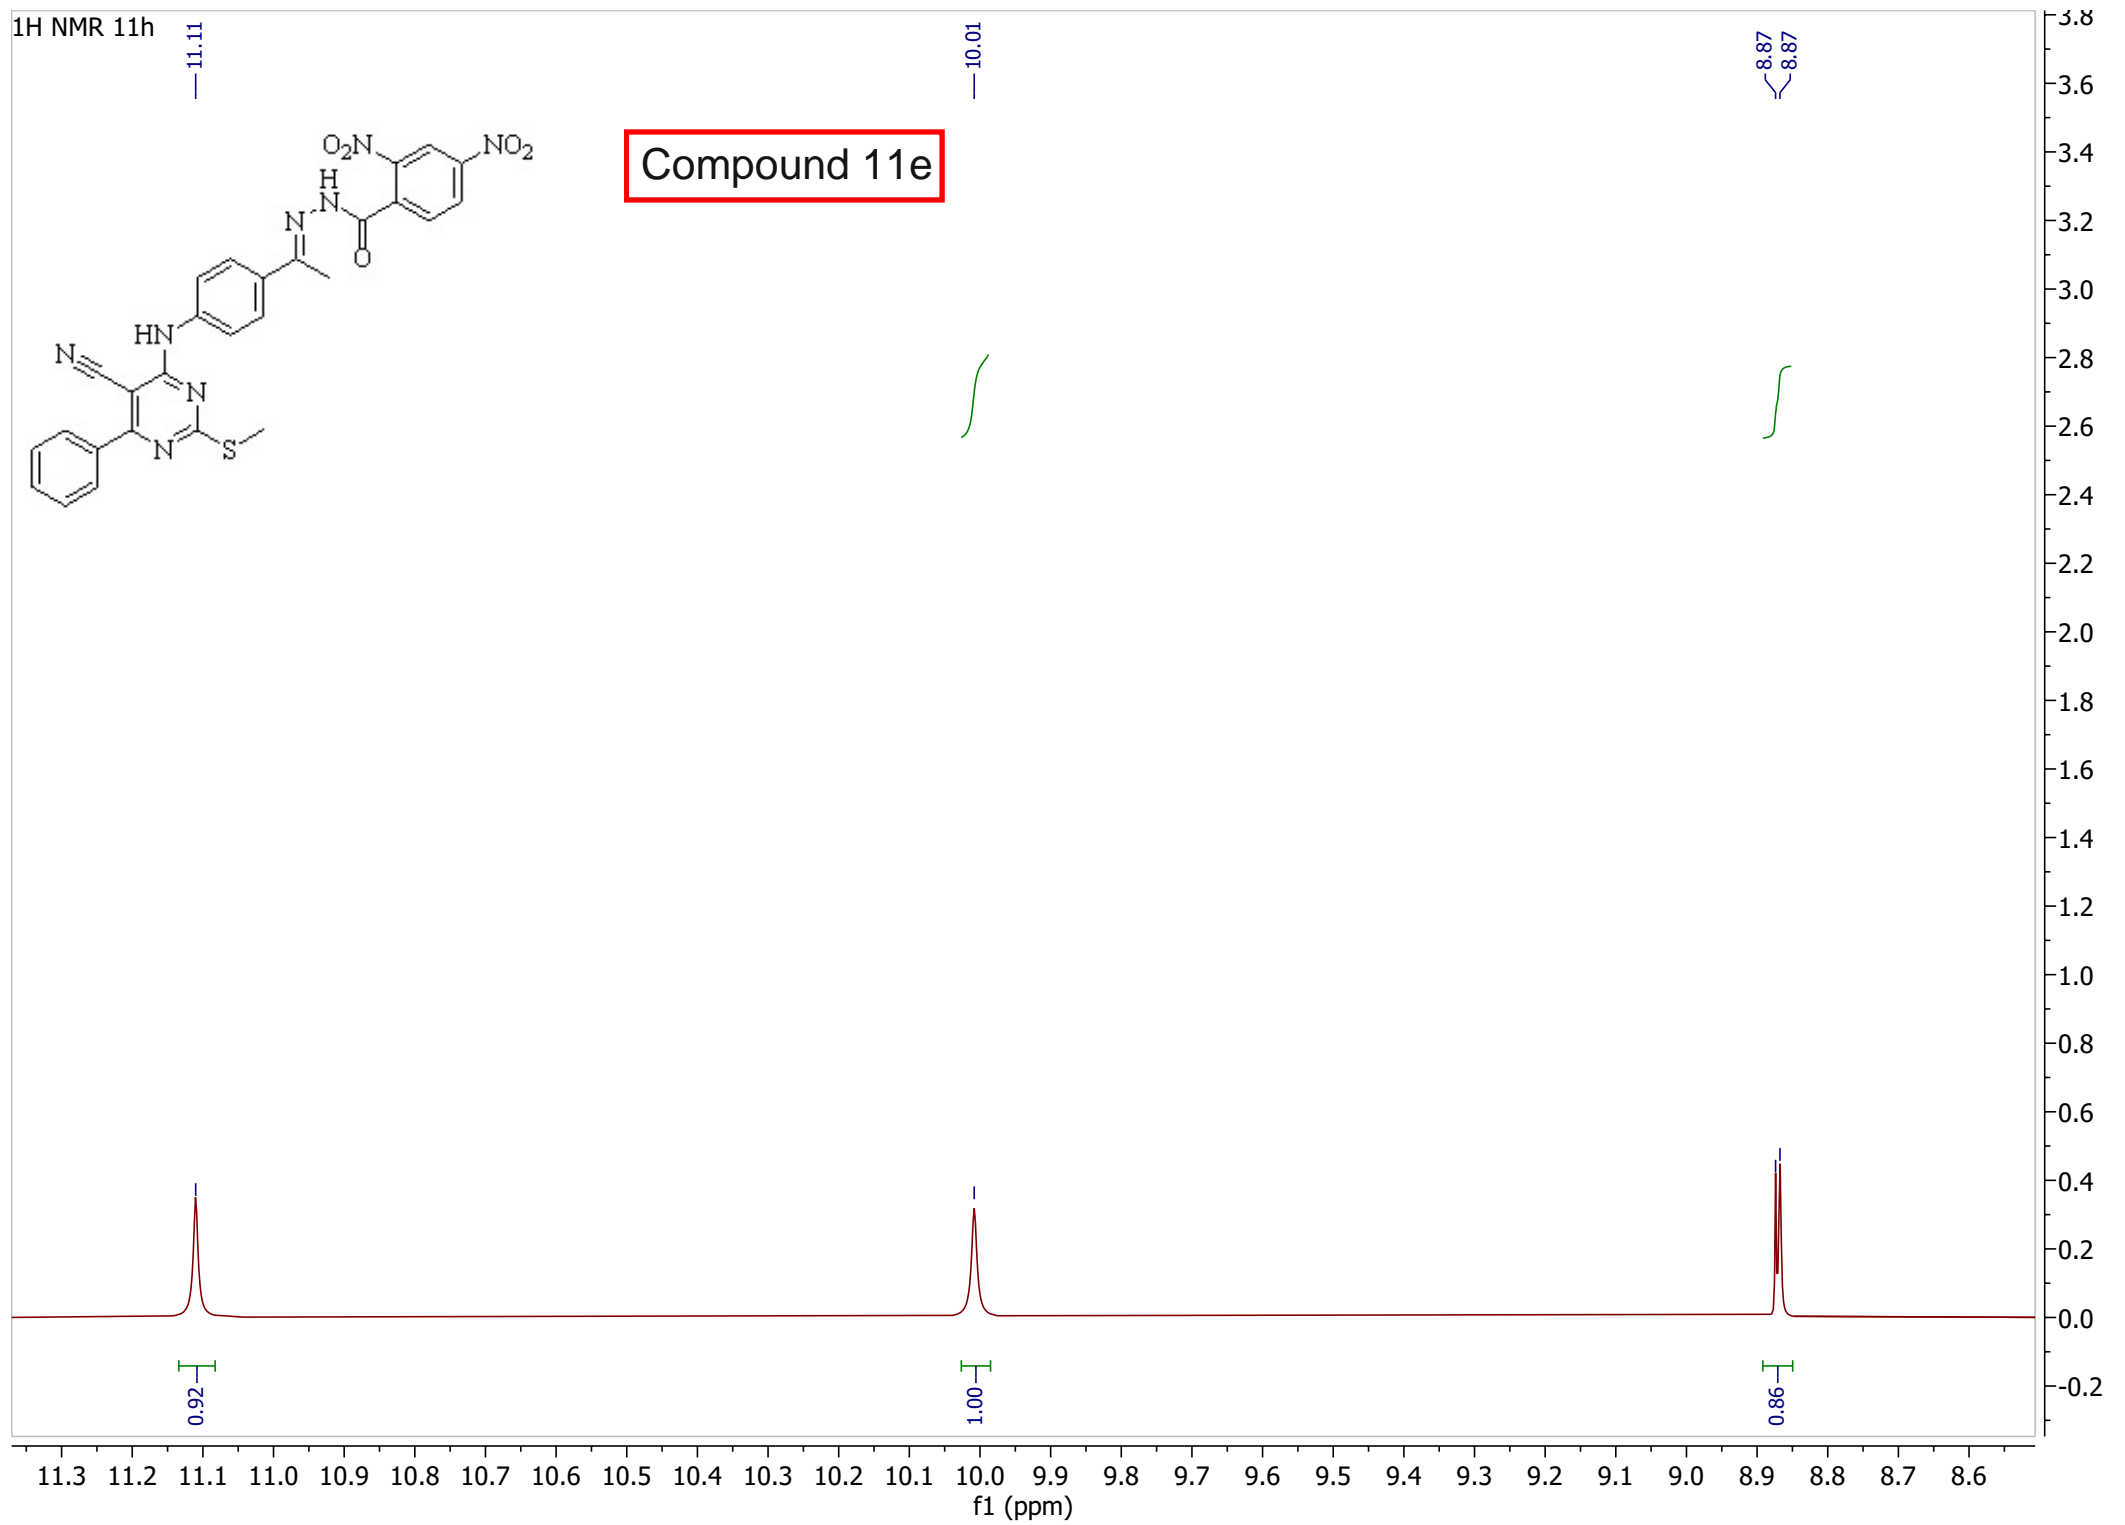



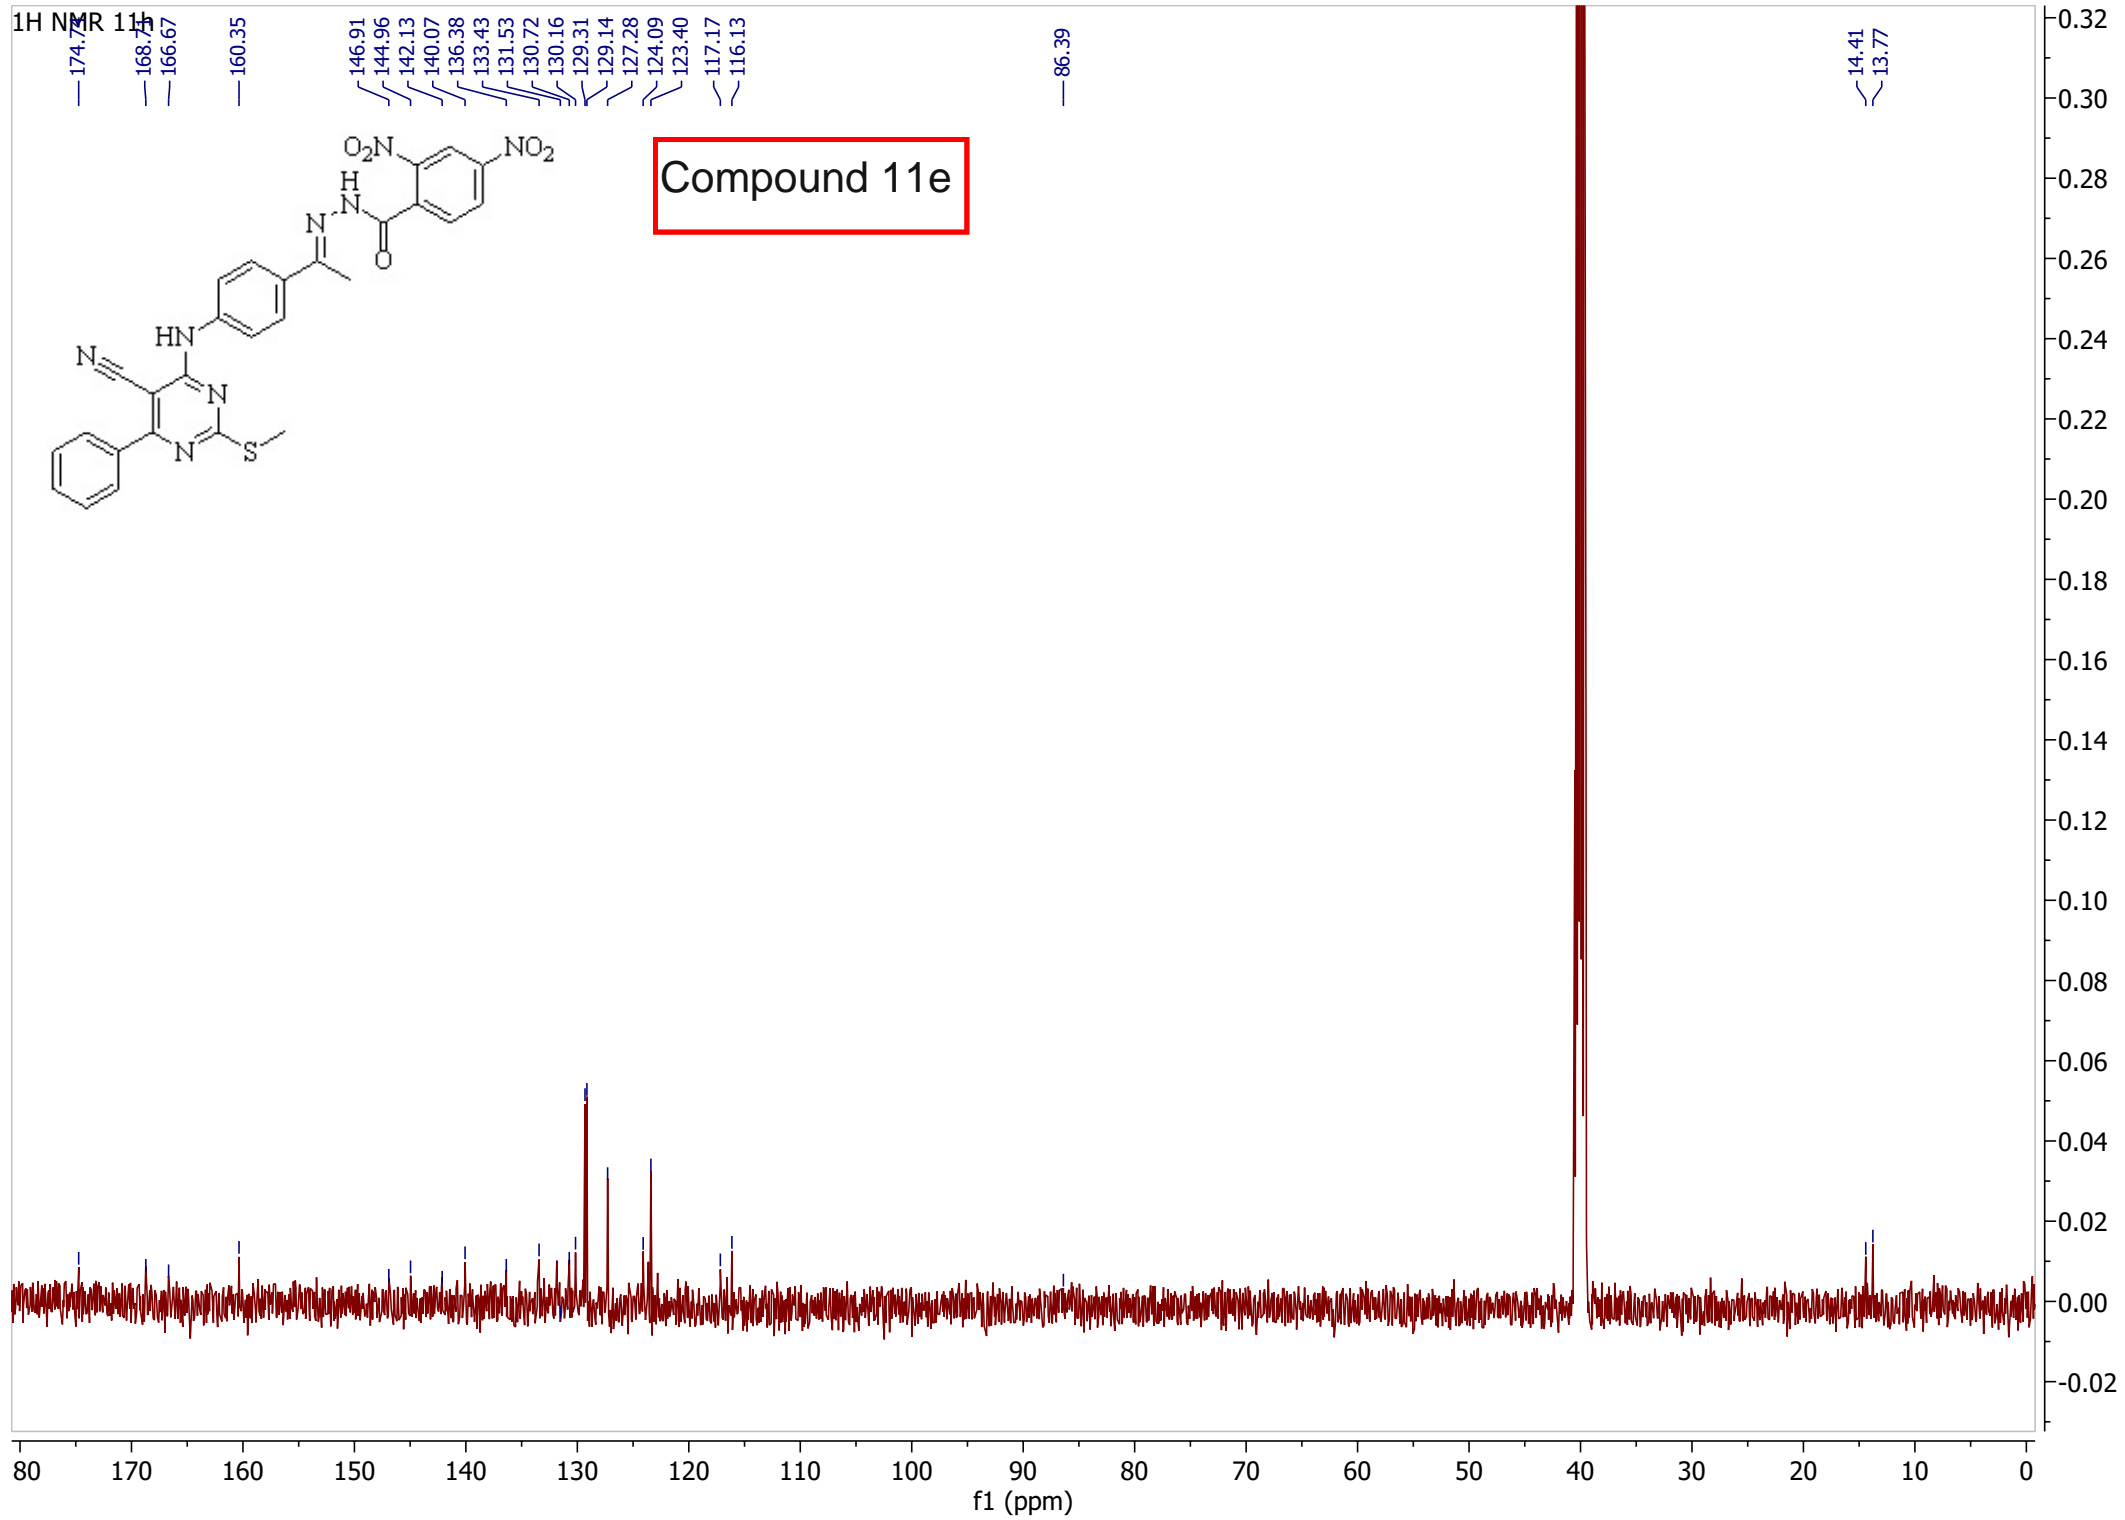

1H NMR 11h

86.39

14.41

13.77

Compound 11e

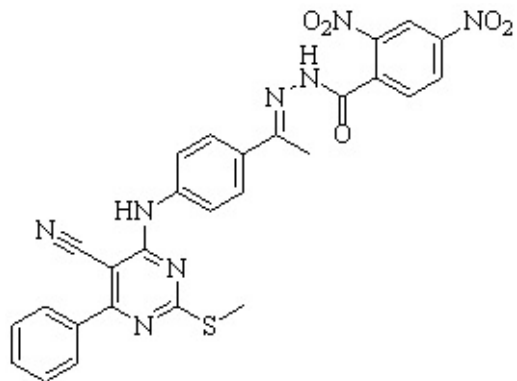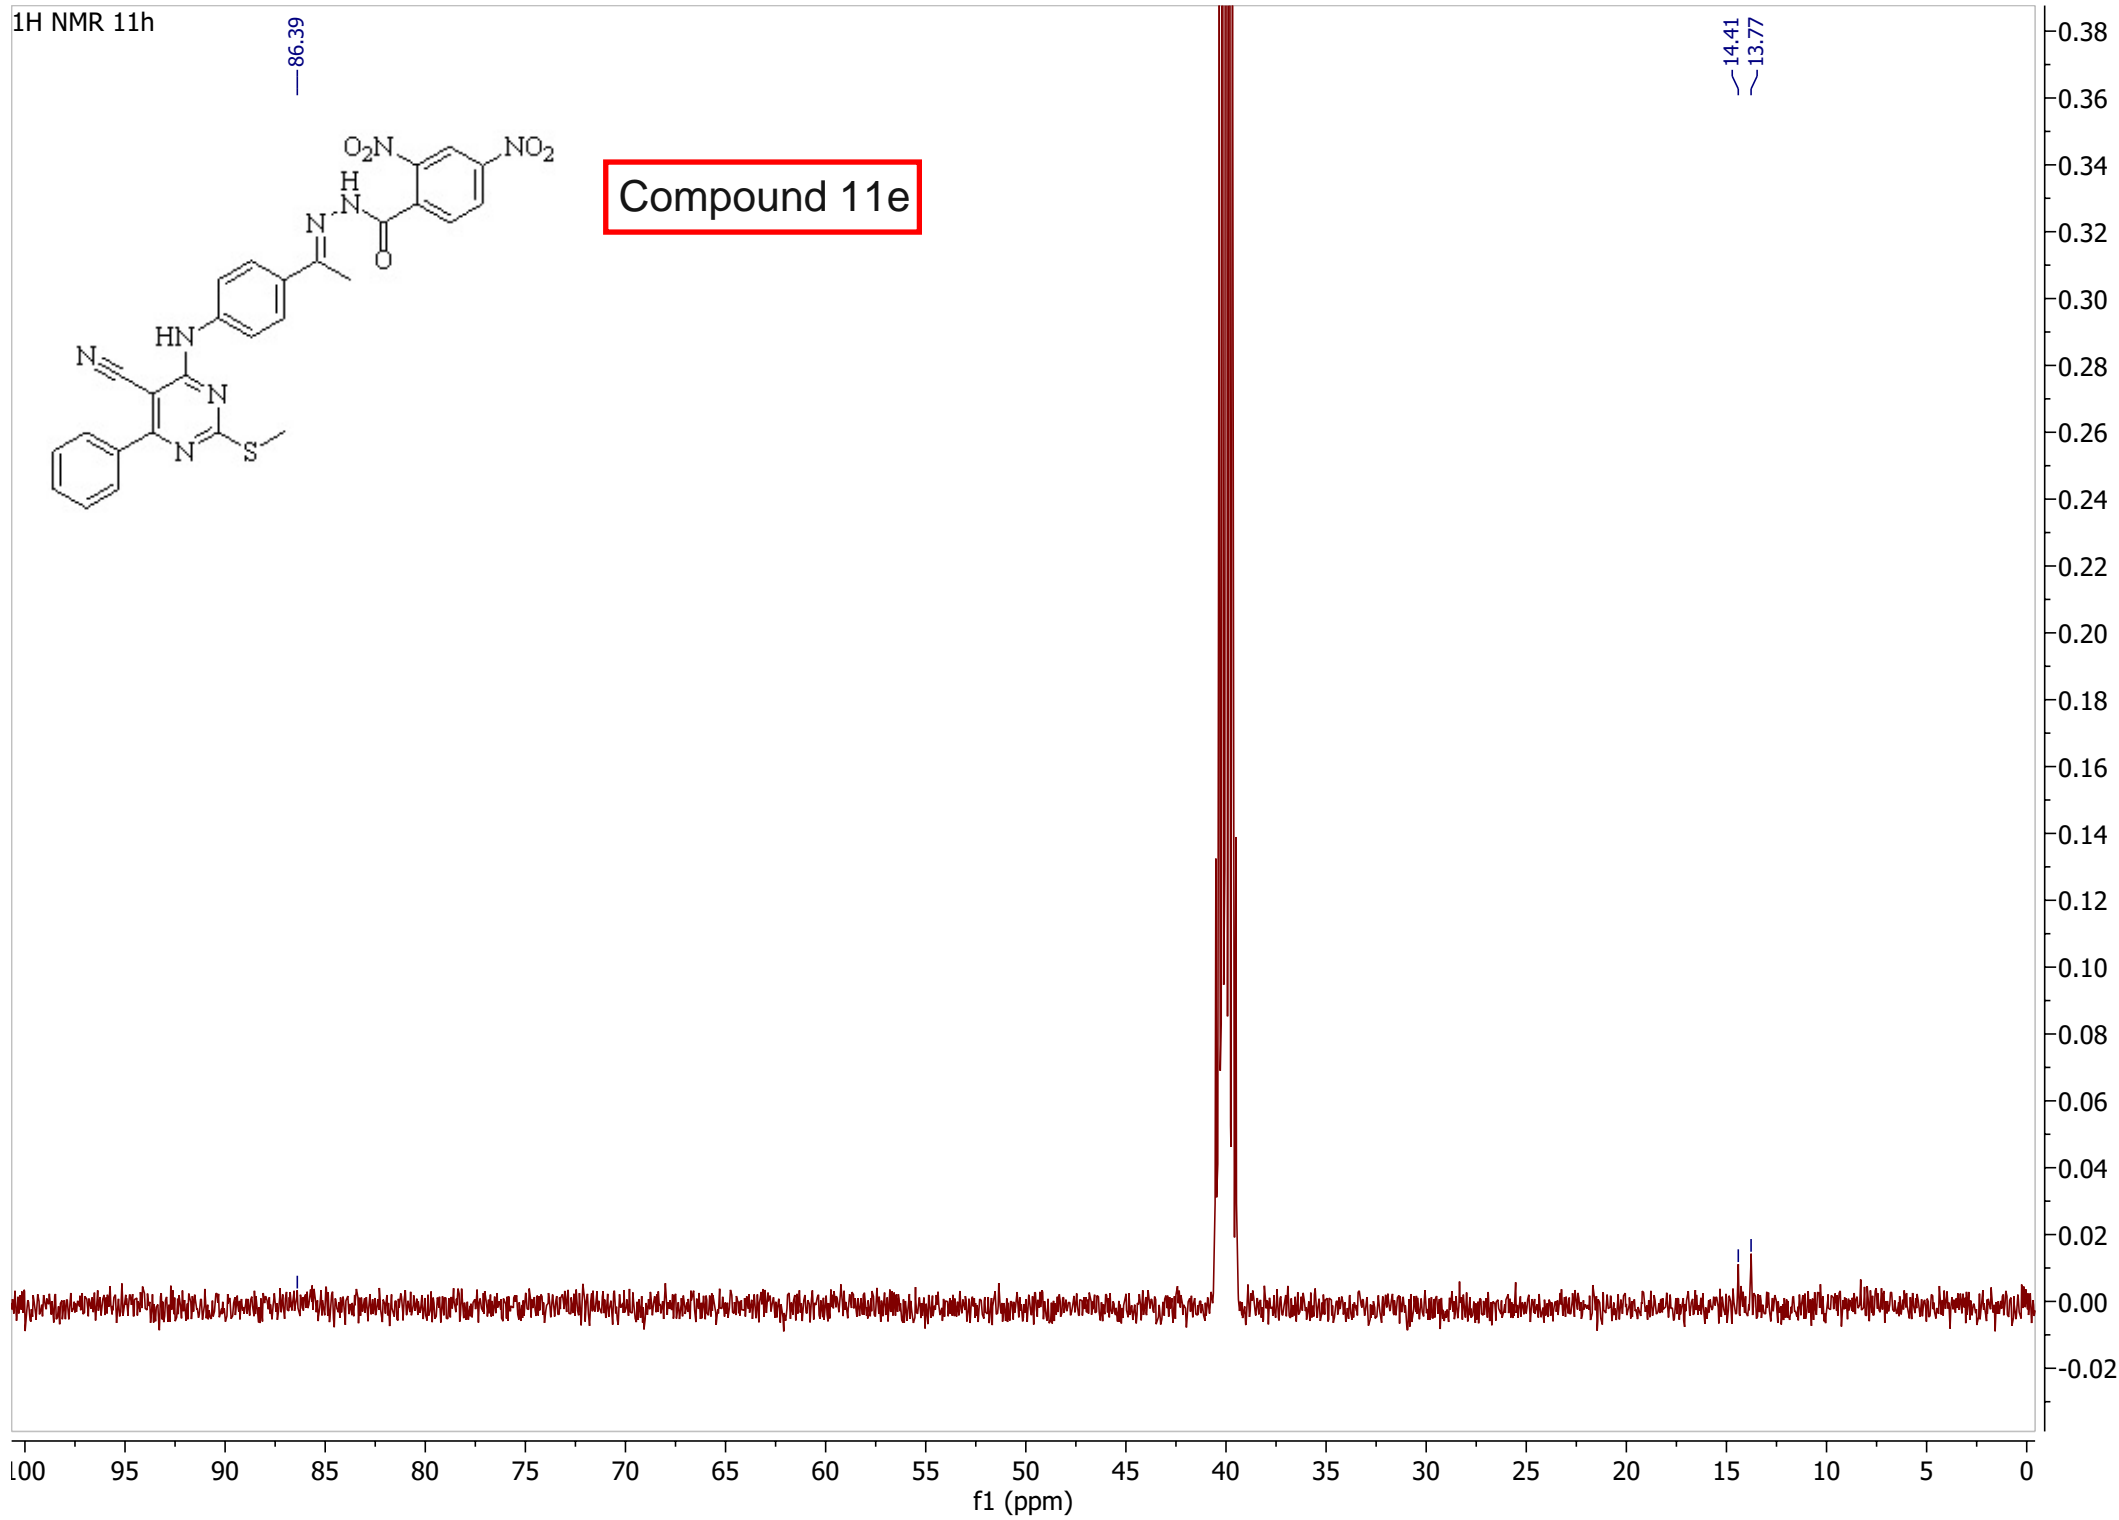

<sup>1</sup>H NMR 11h

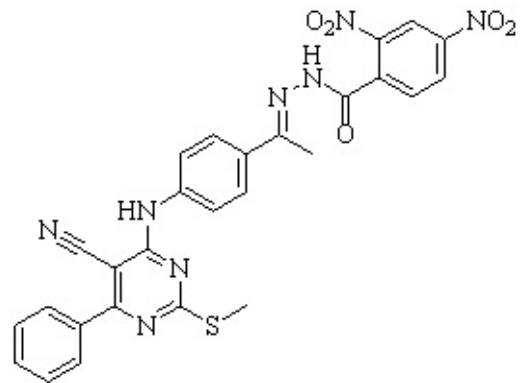

Compound 11e

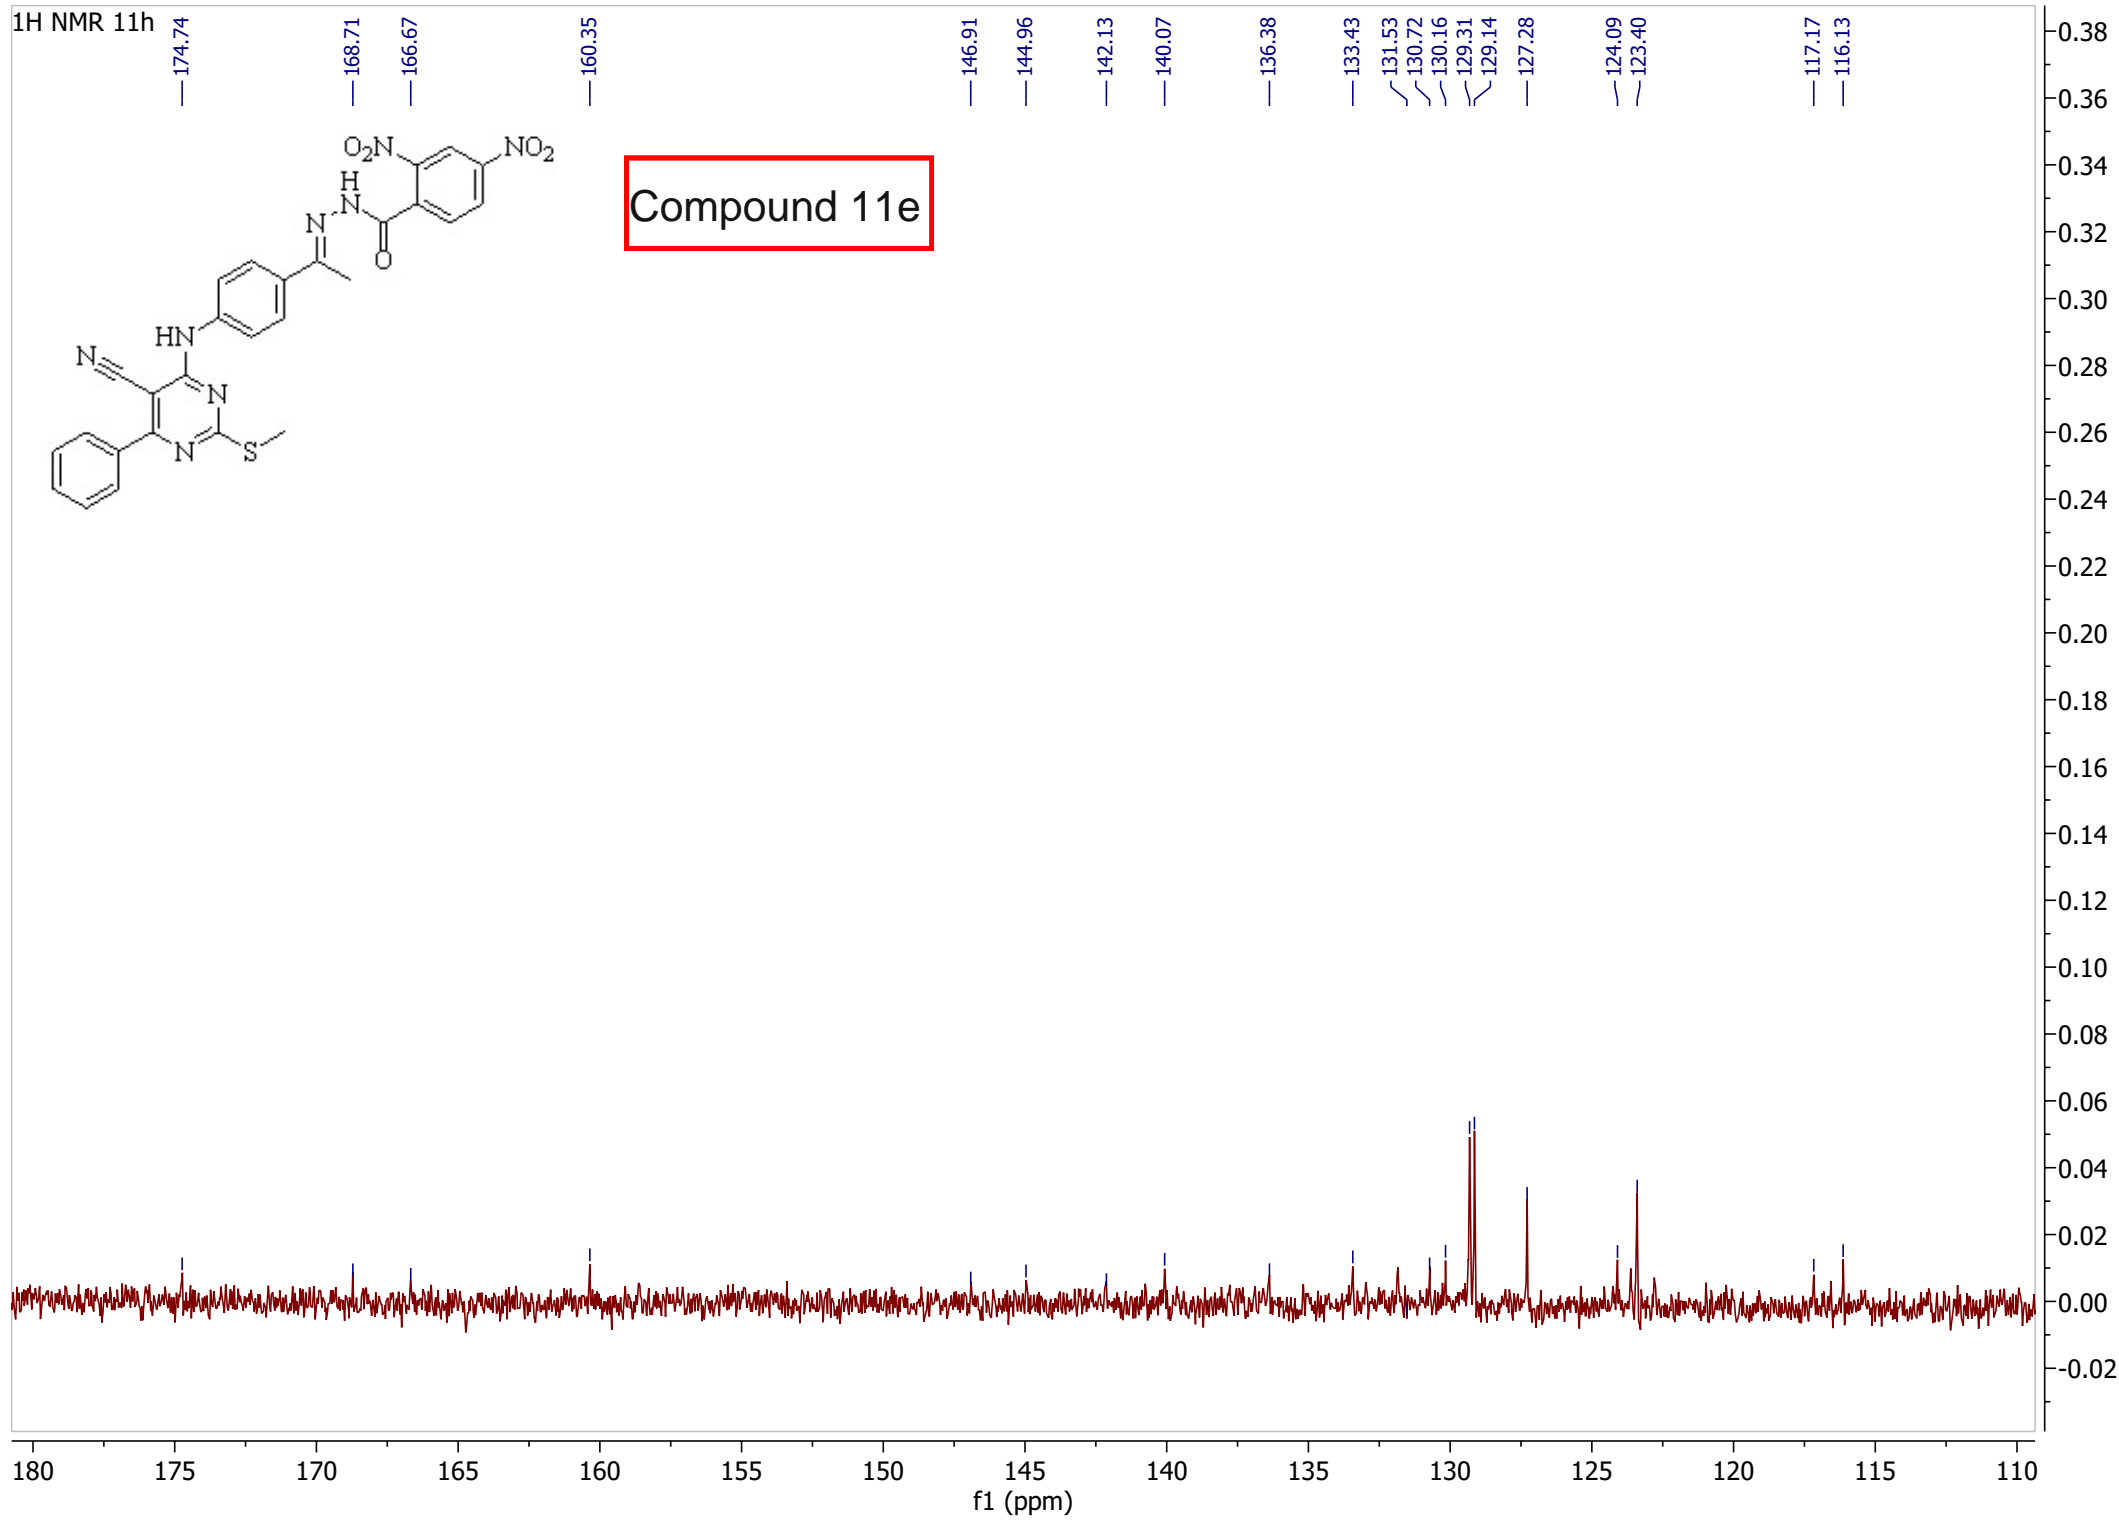

# SAMPLE INFORMATION

|                   |                           |                     |                                 |
|-------------------|---------------------------|---------------------|---------------------------------|
| Sample Name:      | ASZM7 <b>Compound 12a</b> | Acquired By:        | System                          |
| Sample Type:      | Unknown                   | Sample Set Name:    | 1                               |
| Vial:             | 17                        | Acq. Method Set:    | Organic1                        |
| Injection #:      | 1                         | Processing Method:  | Default1                        |
| Injection Volume: | 2.00 ul                   | Channel Name:       | 280.0nm                         |
| Run Time:         | 14.5 Minutes              | Proc. Chnl. Descr.: | W2996 FDA 280.0 nm(FDA 190.0 to |
|                   |                           |                     |                                 |
| Date Acquired:    | 11/6/2022 2:34:04 AMEET   |                     |                                 |
| Date Processed:   | 11/6/2022 5:08:35 AMEET   |                     |                                 |

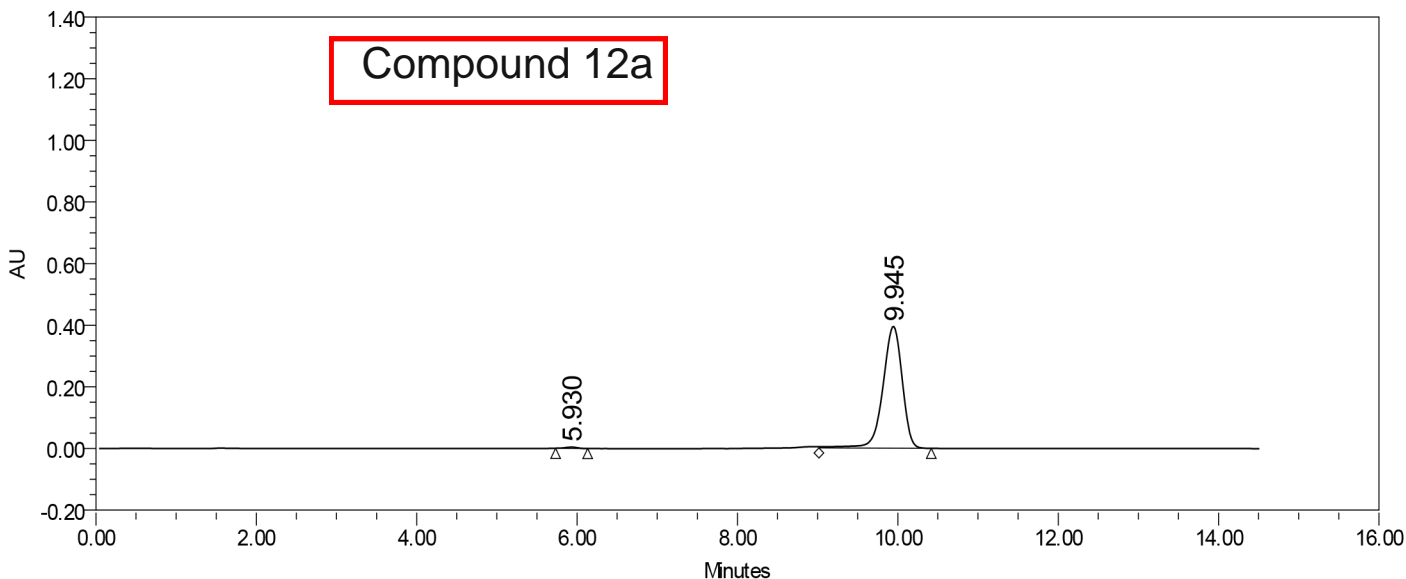

|   | RT    | Area    | % Area | Height |
|---|-------|---------|--------|--------|
| 1 | 5.930 | 40958   | 0.62   | 4091   |
| 2 | 9.945 | 6609864 | 99.38  | 395628 |

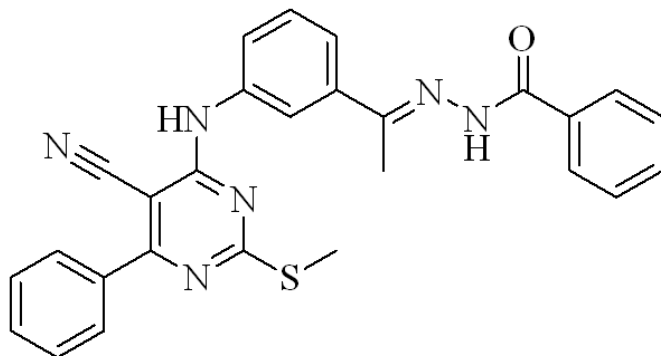

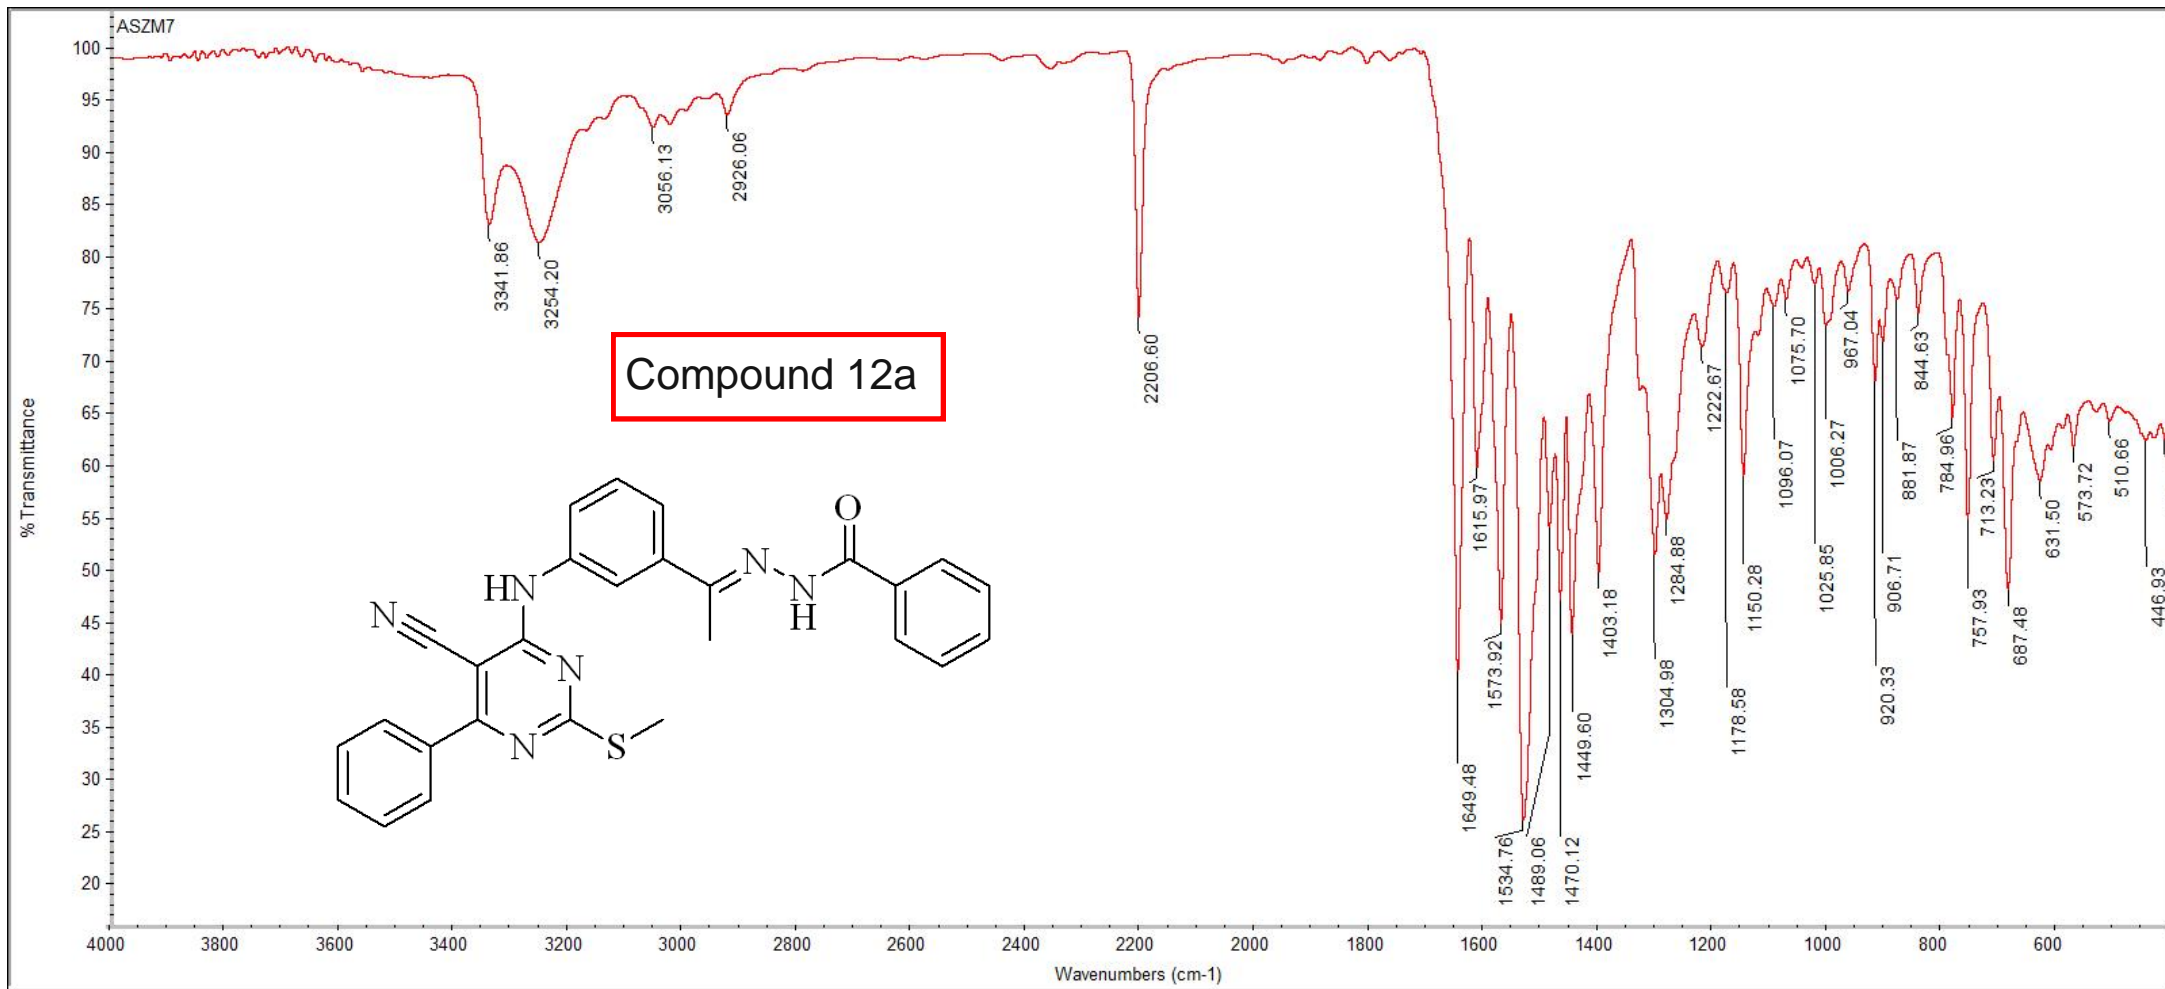

<sup>1</sup>H NMR 11h

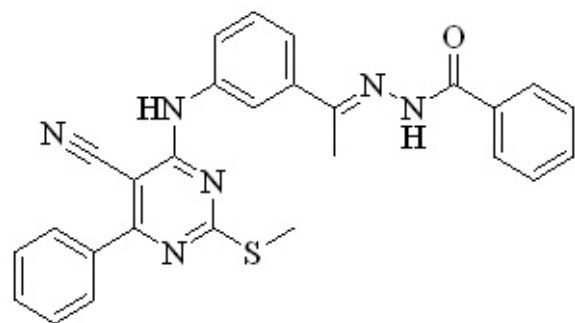

Compound 12a

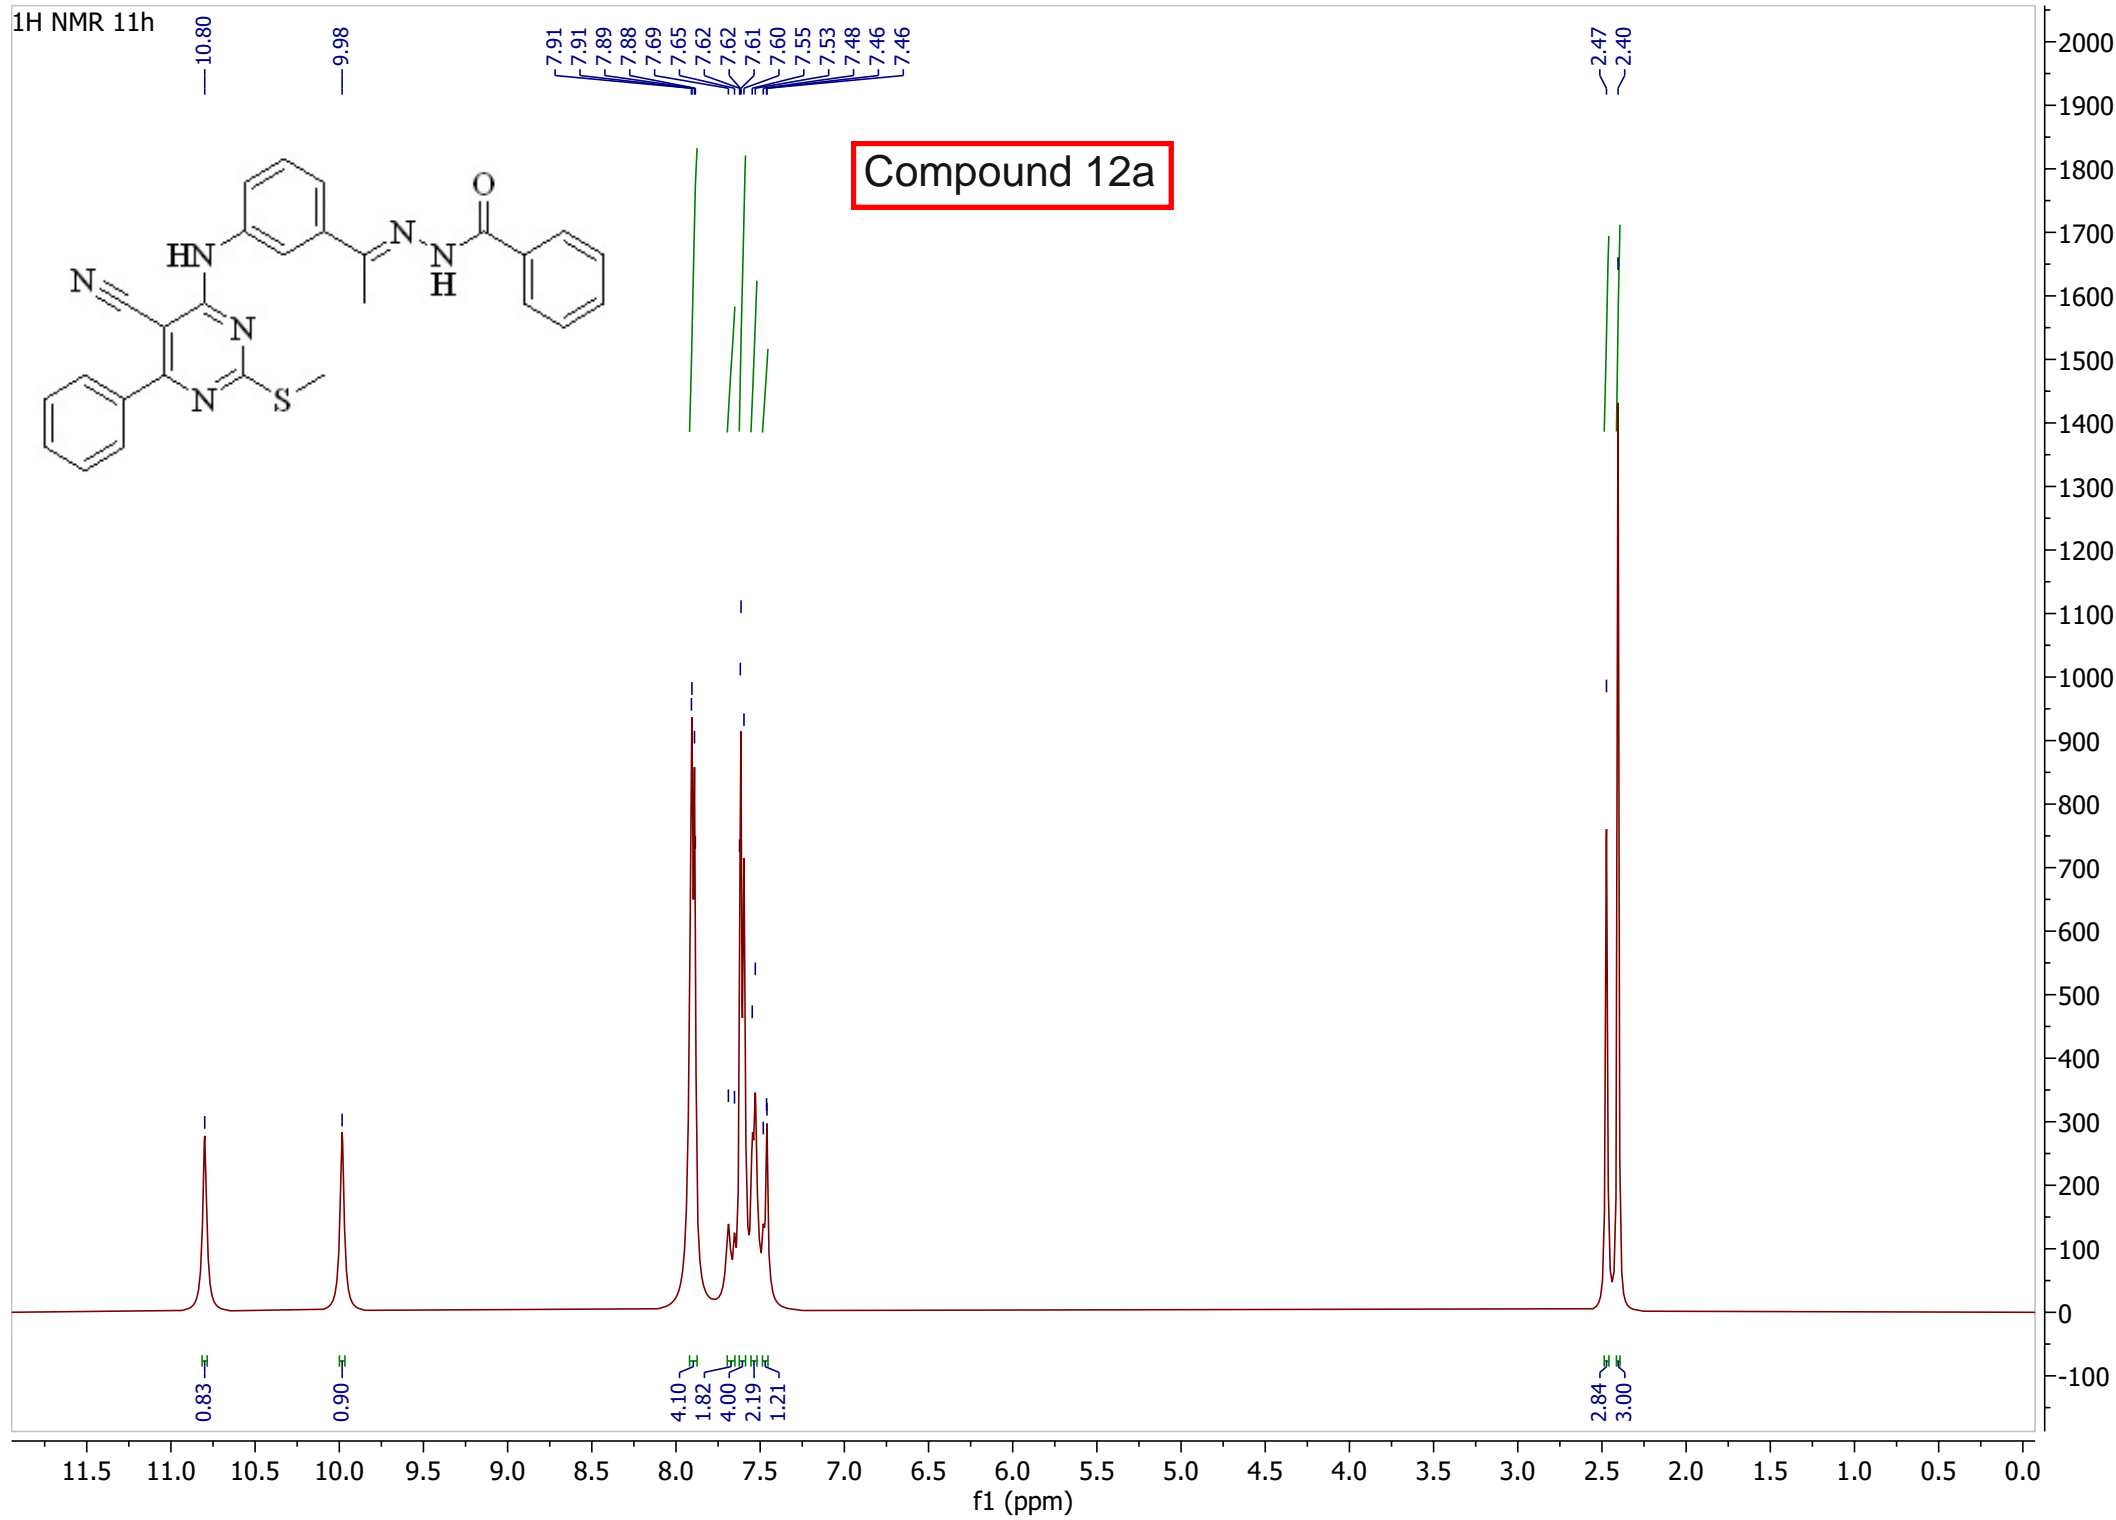

<sup>1</sup>H NMR 11h

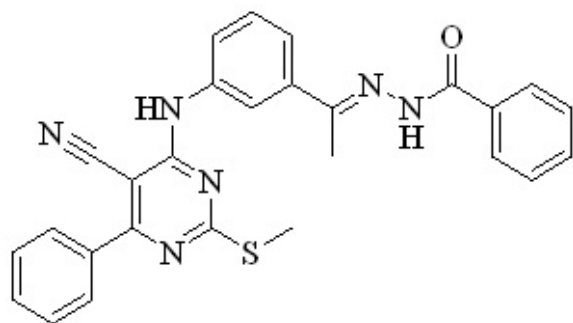

Compound 12a

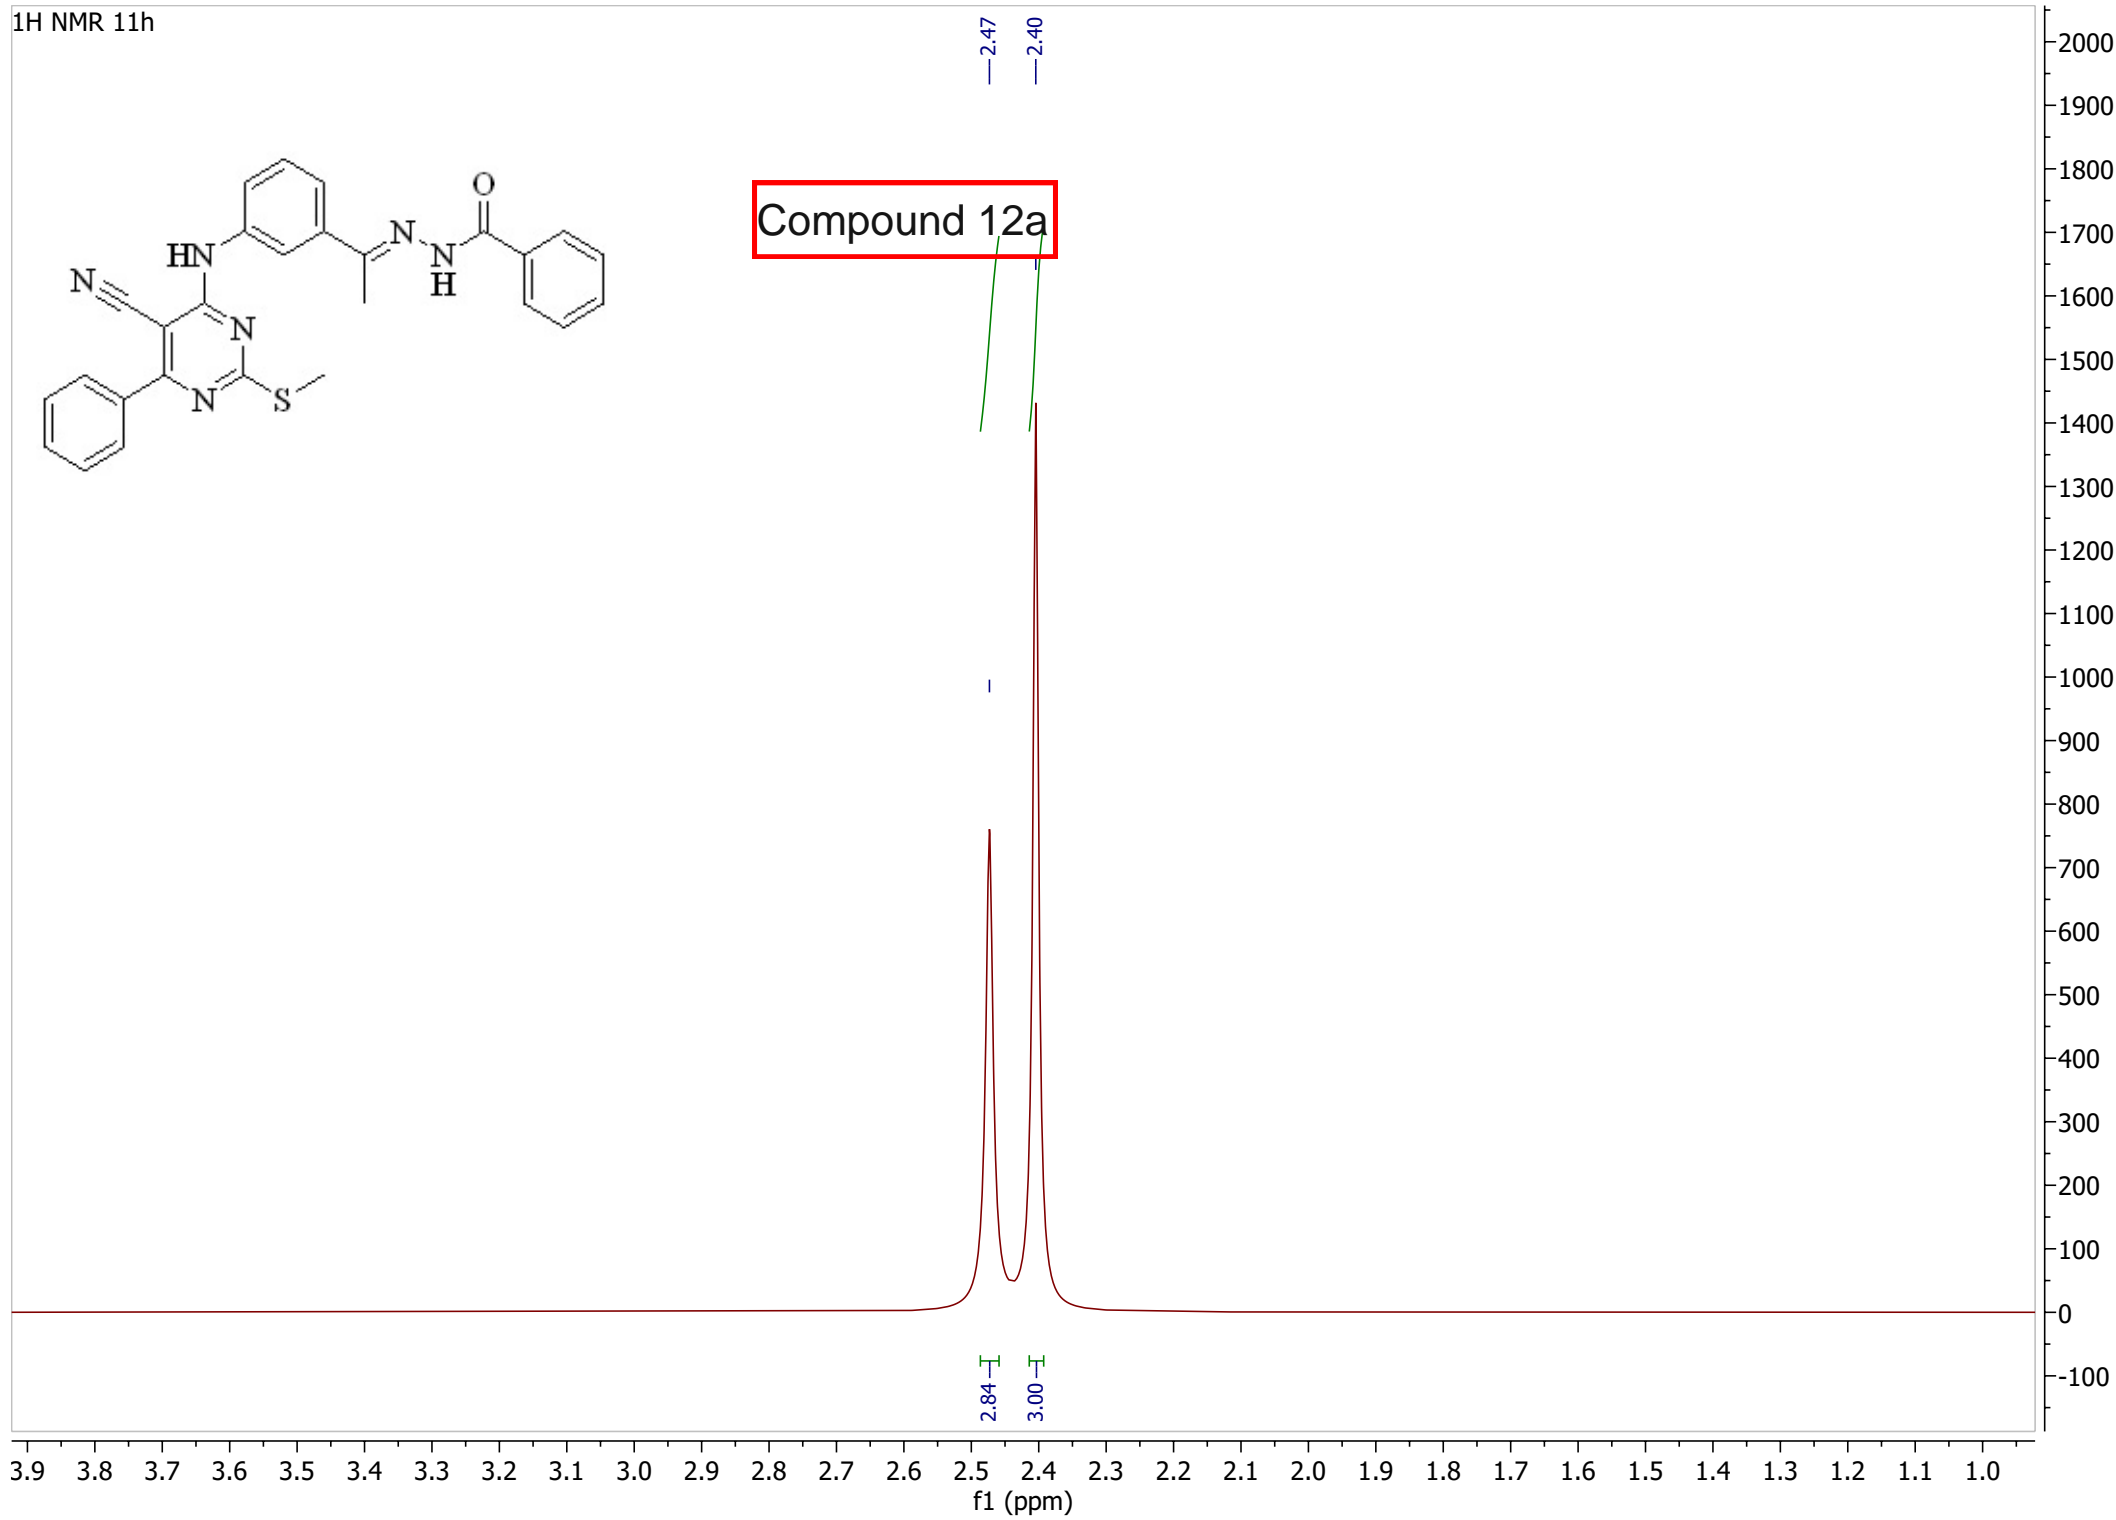



Compound 12a

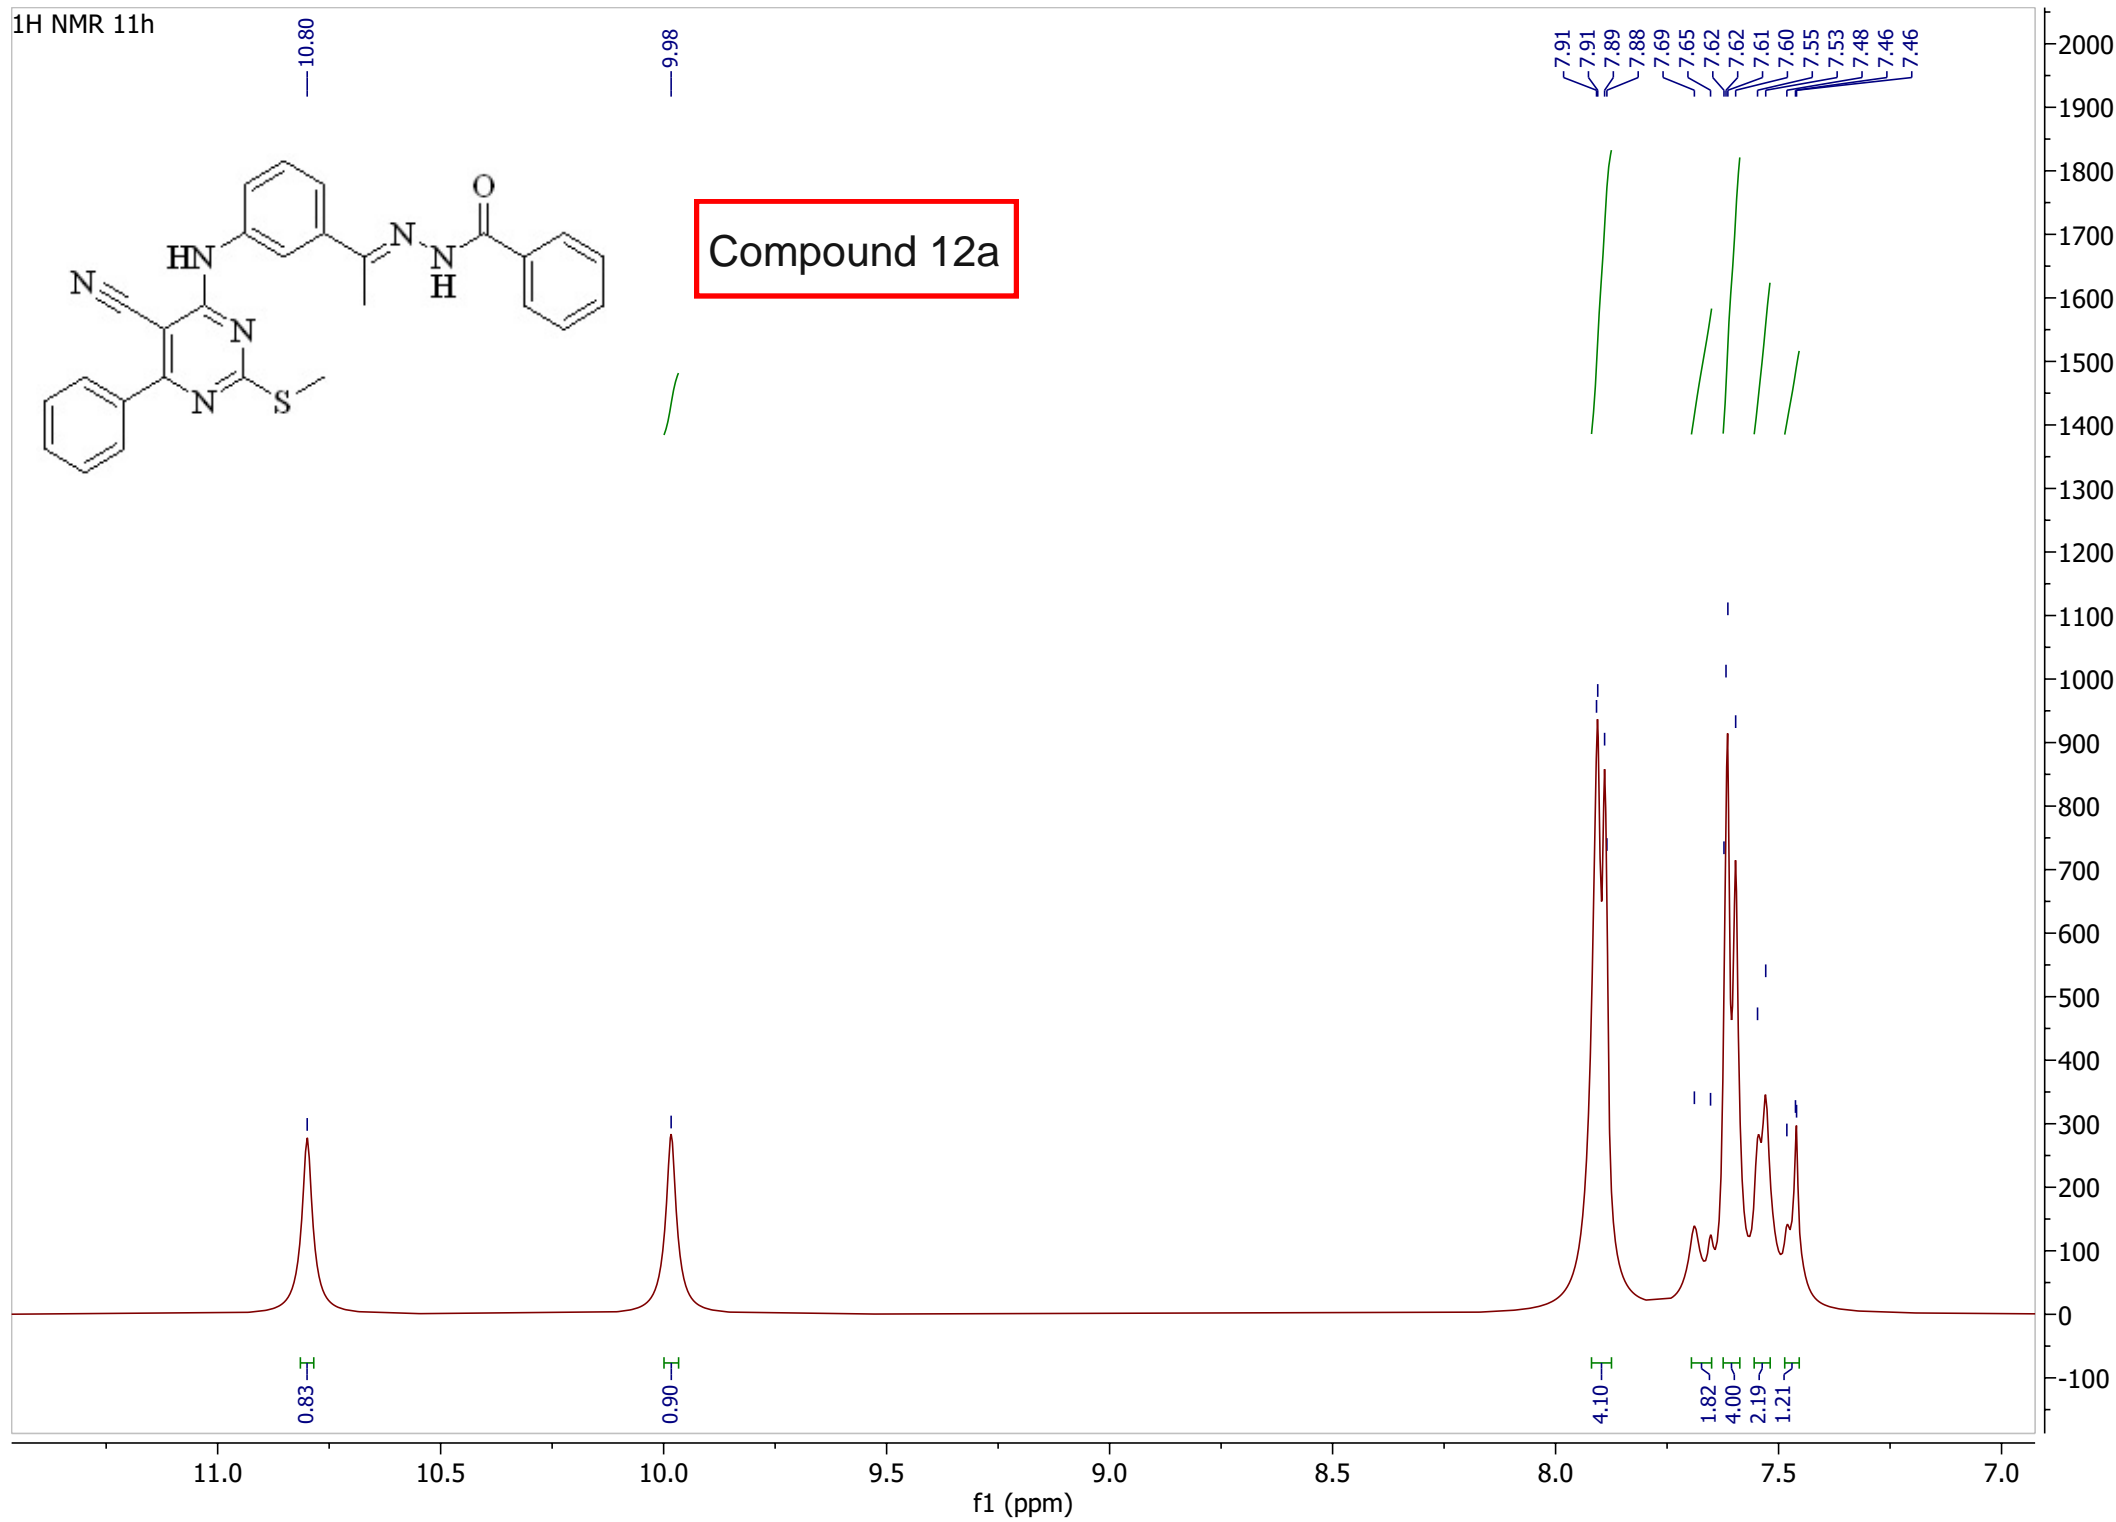



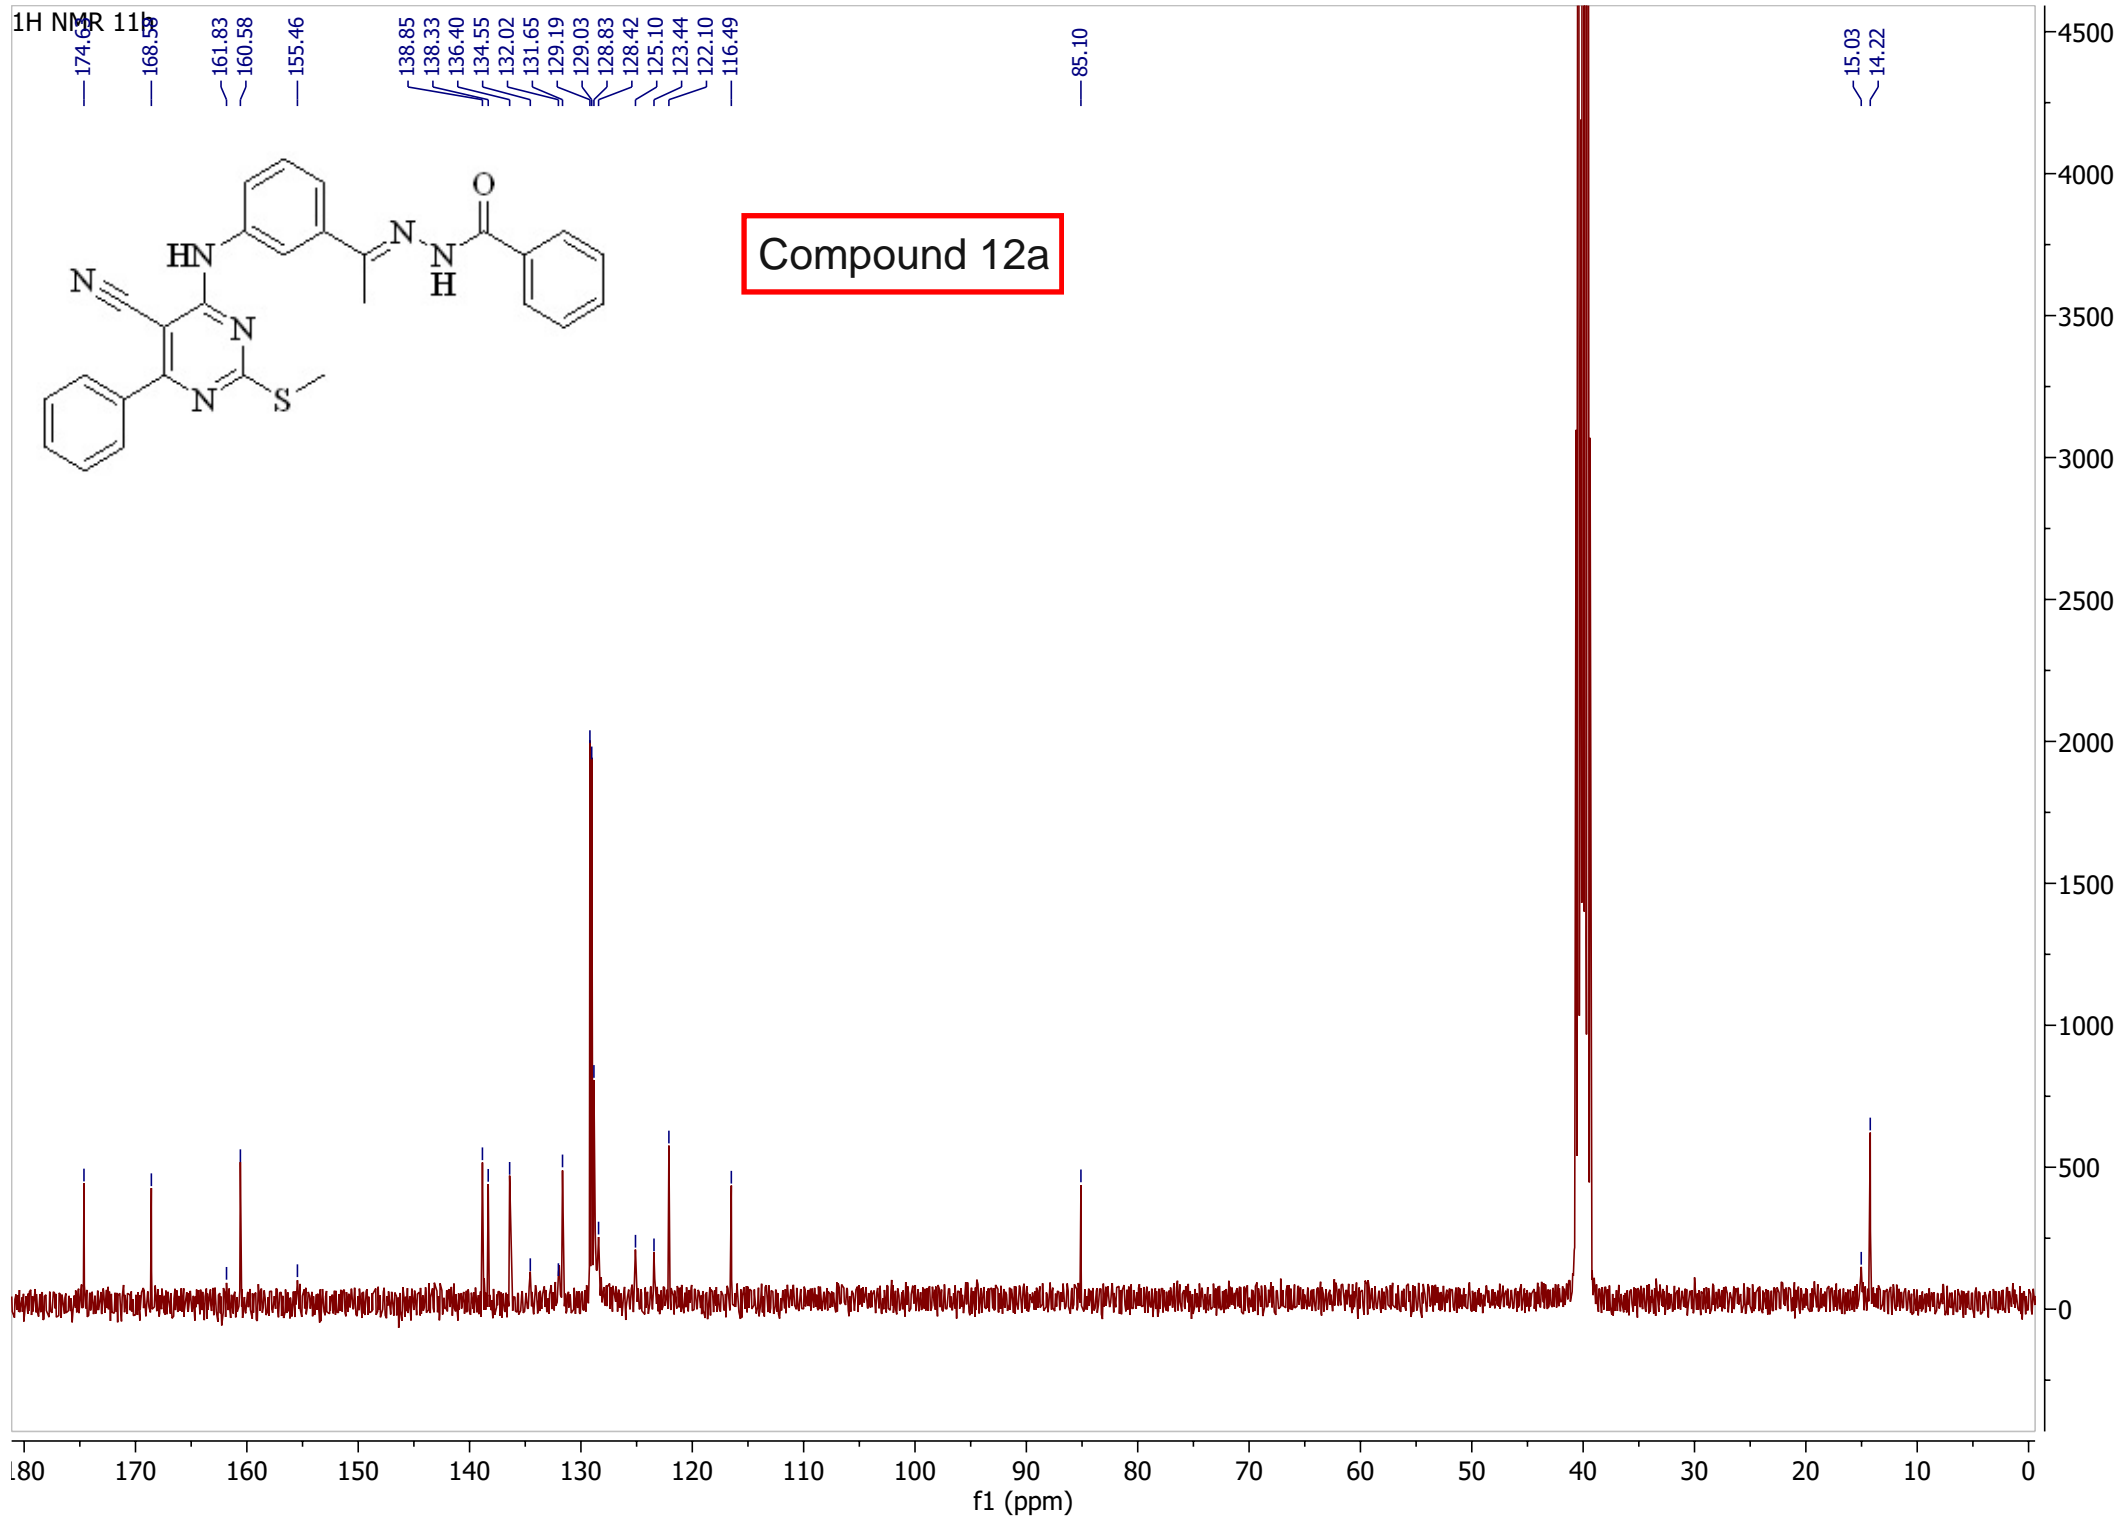

<sup>1</sup>H NMR 11h



Compound 12a

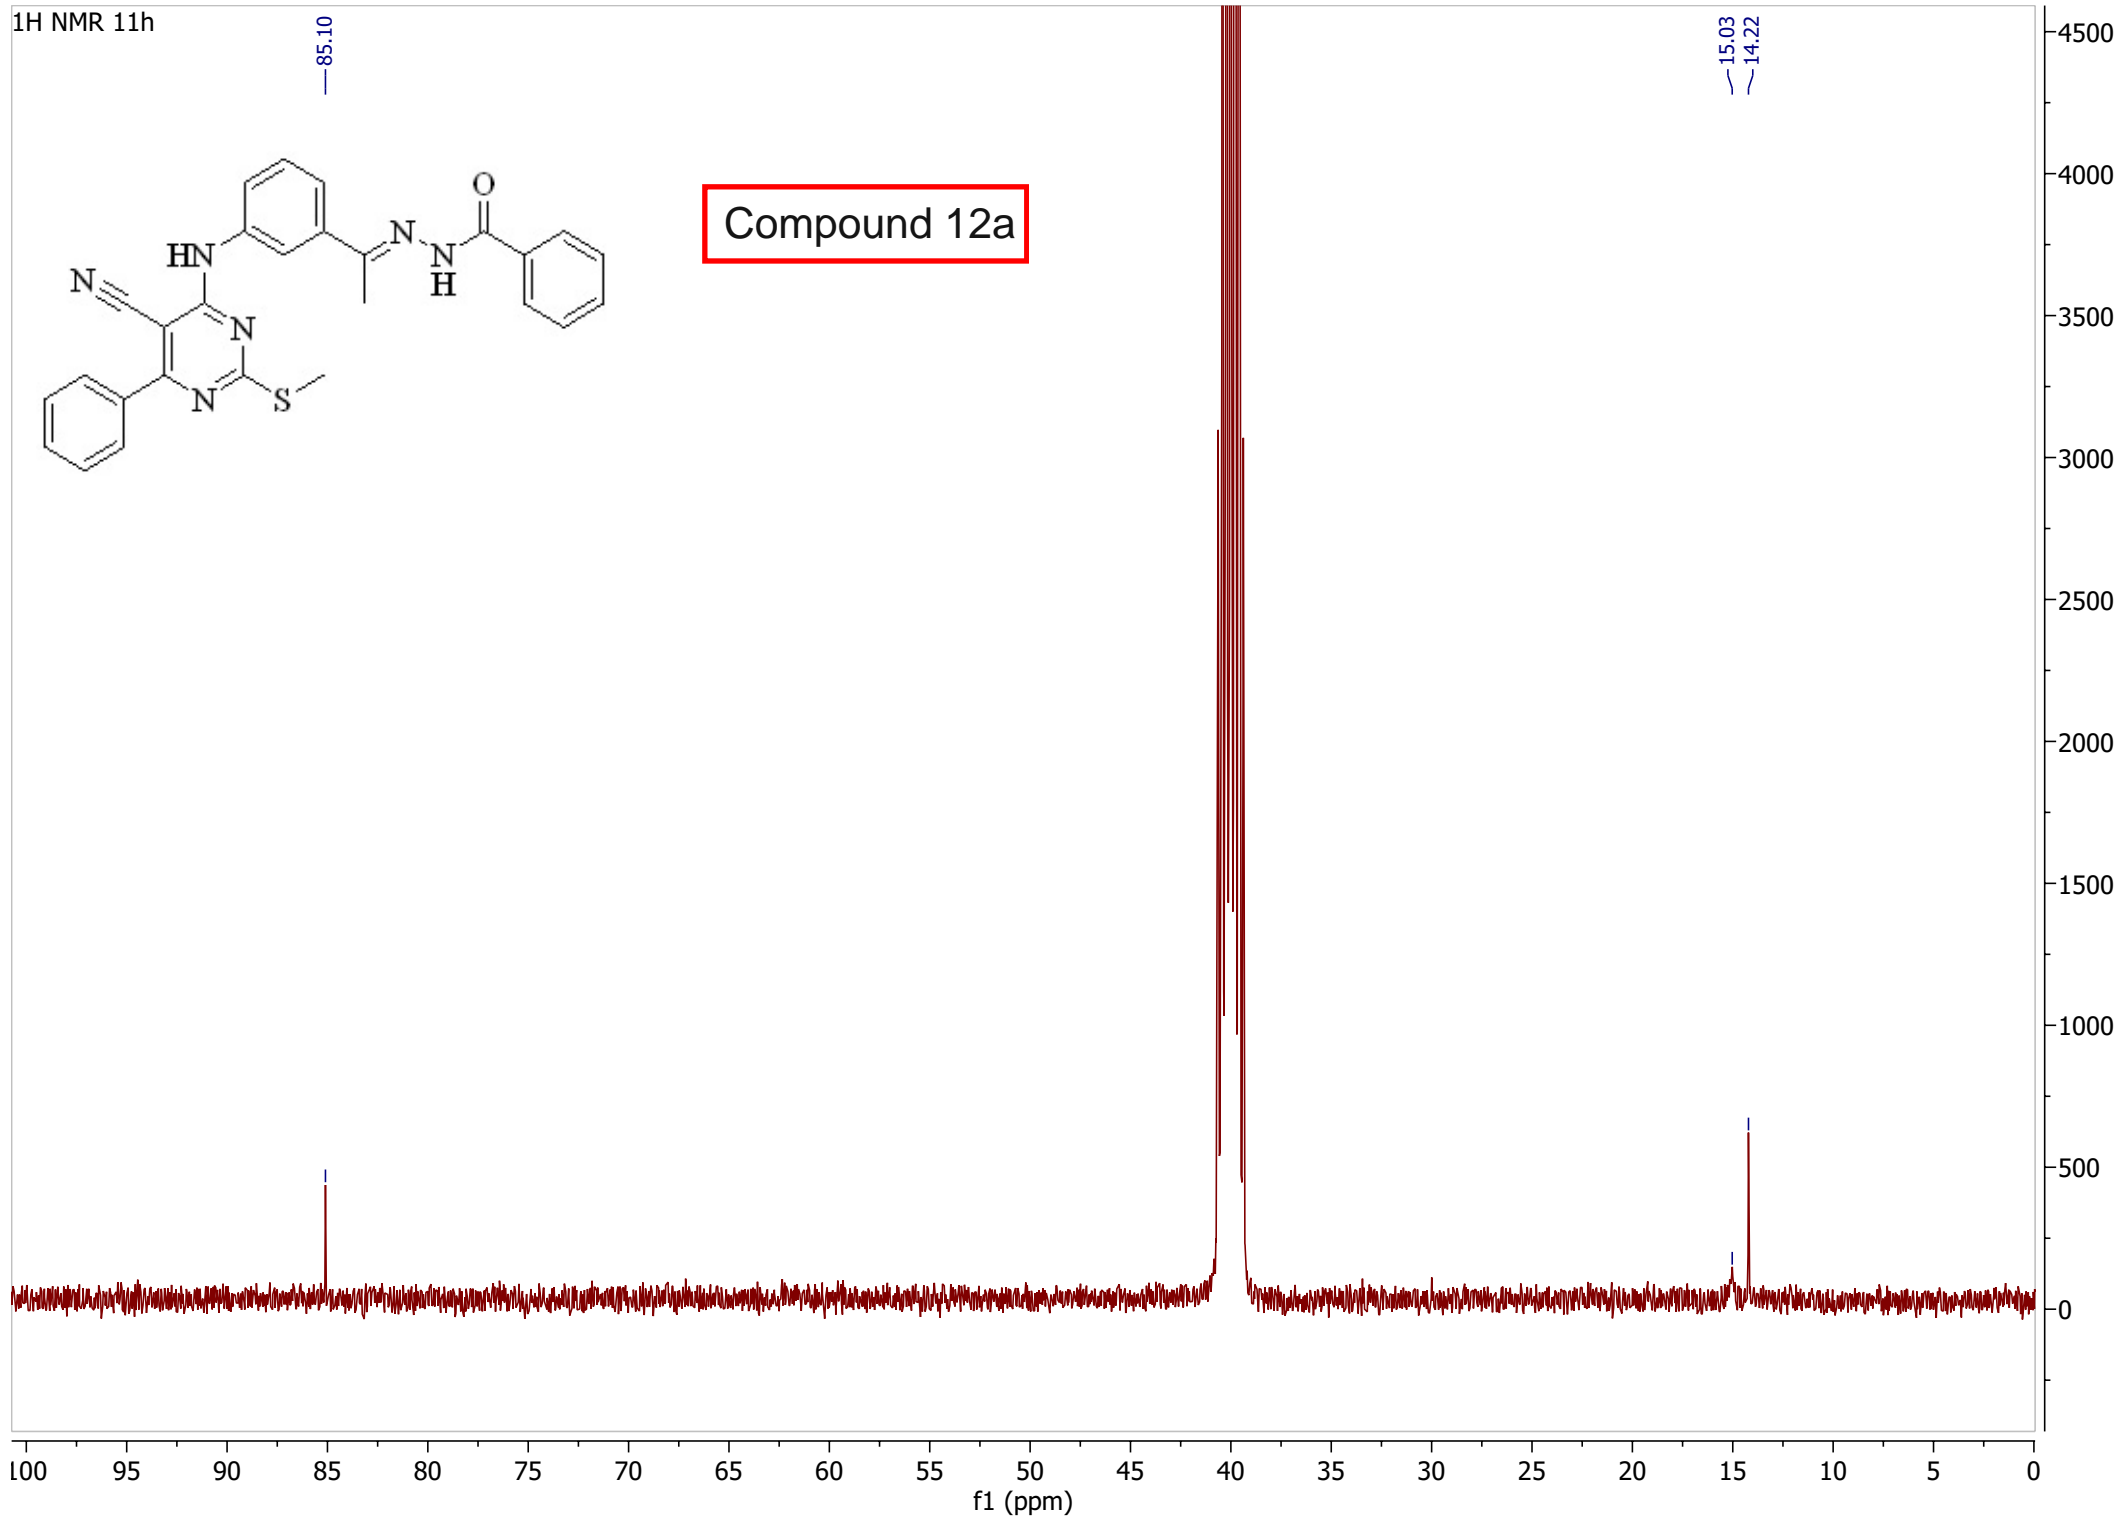

<sup>1</sup>H NMR 11h

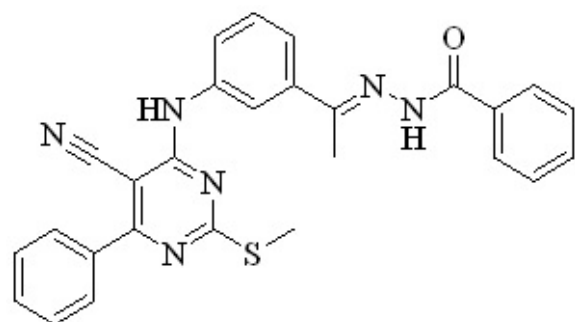

Compound 12a

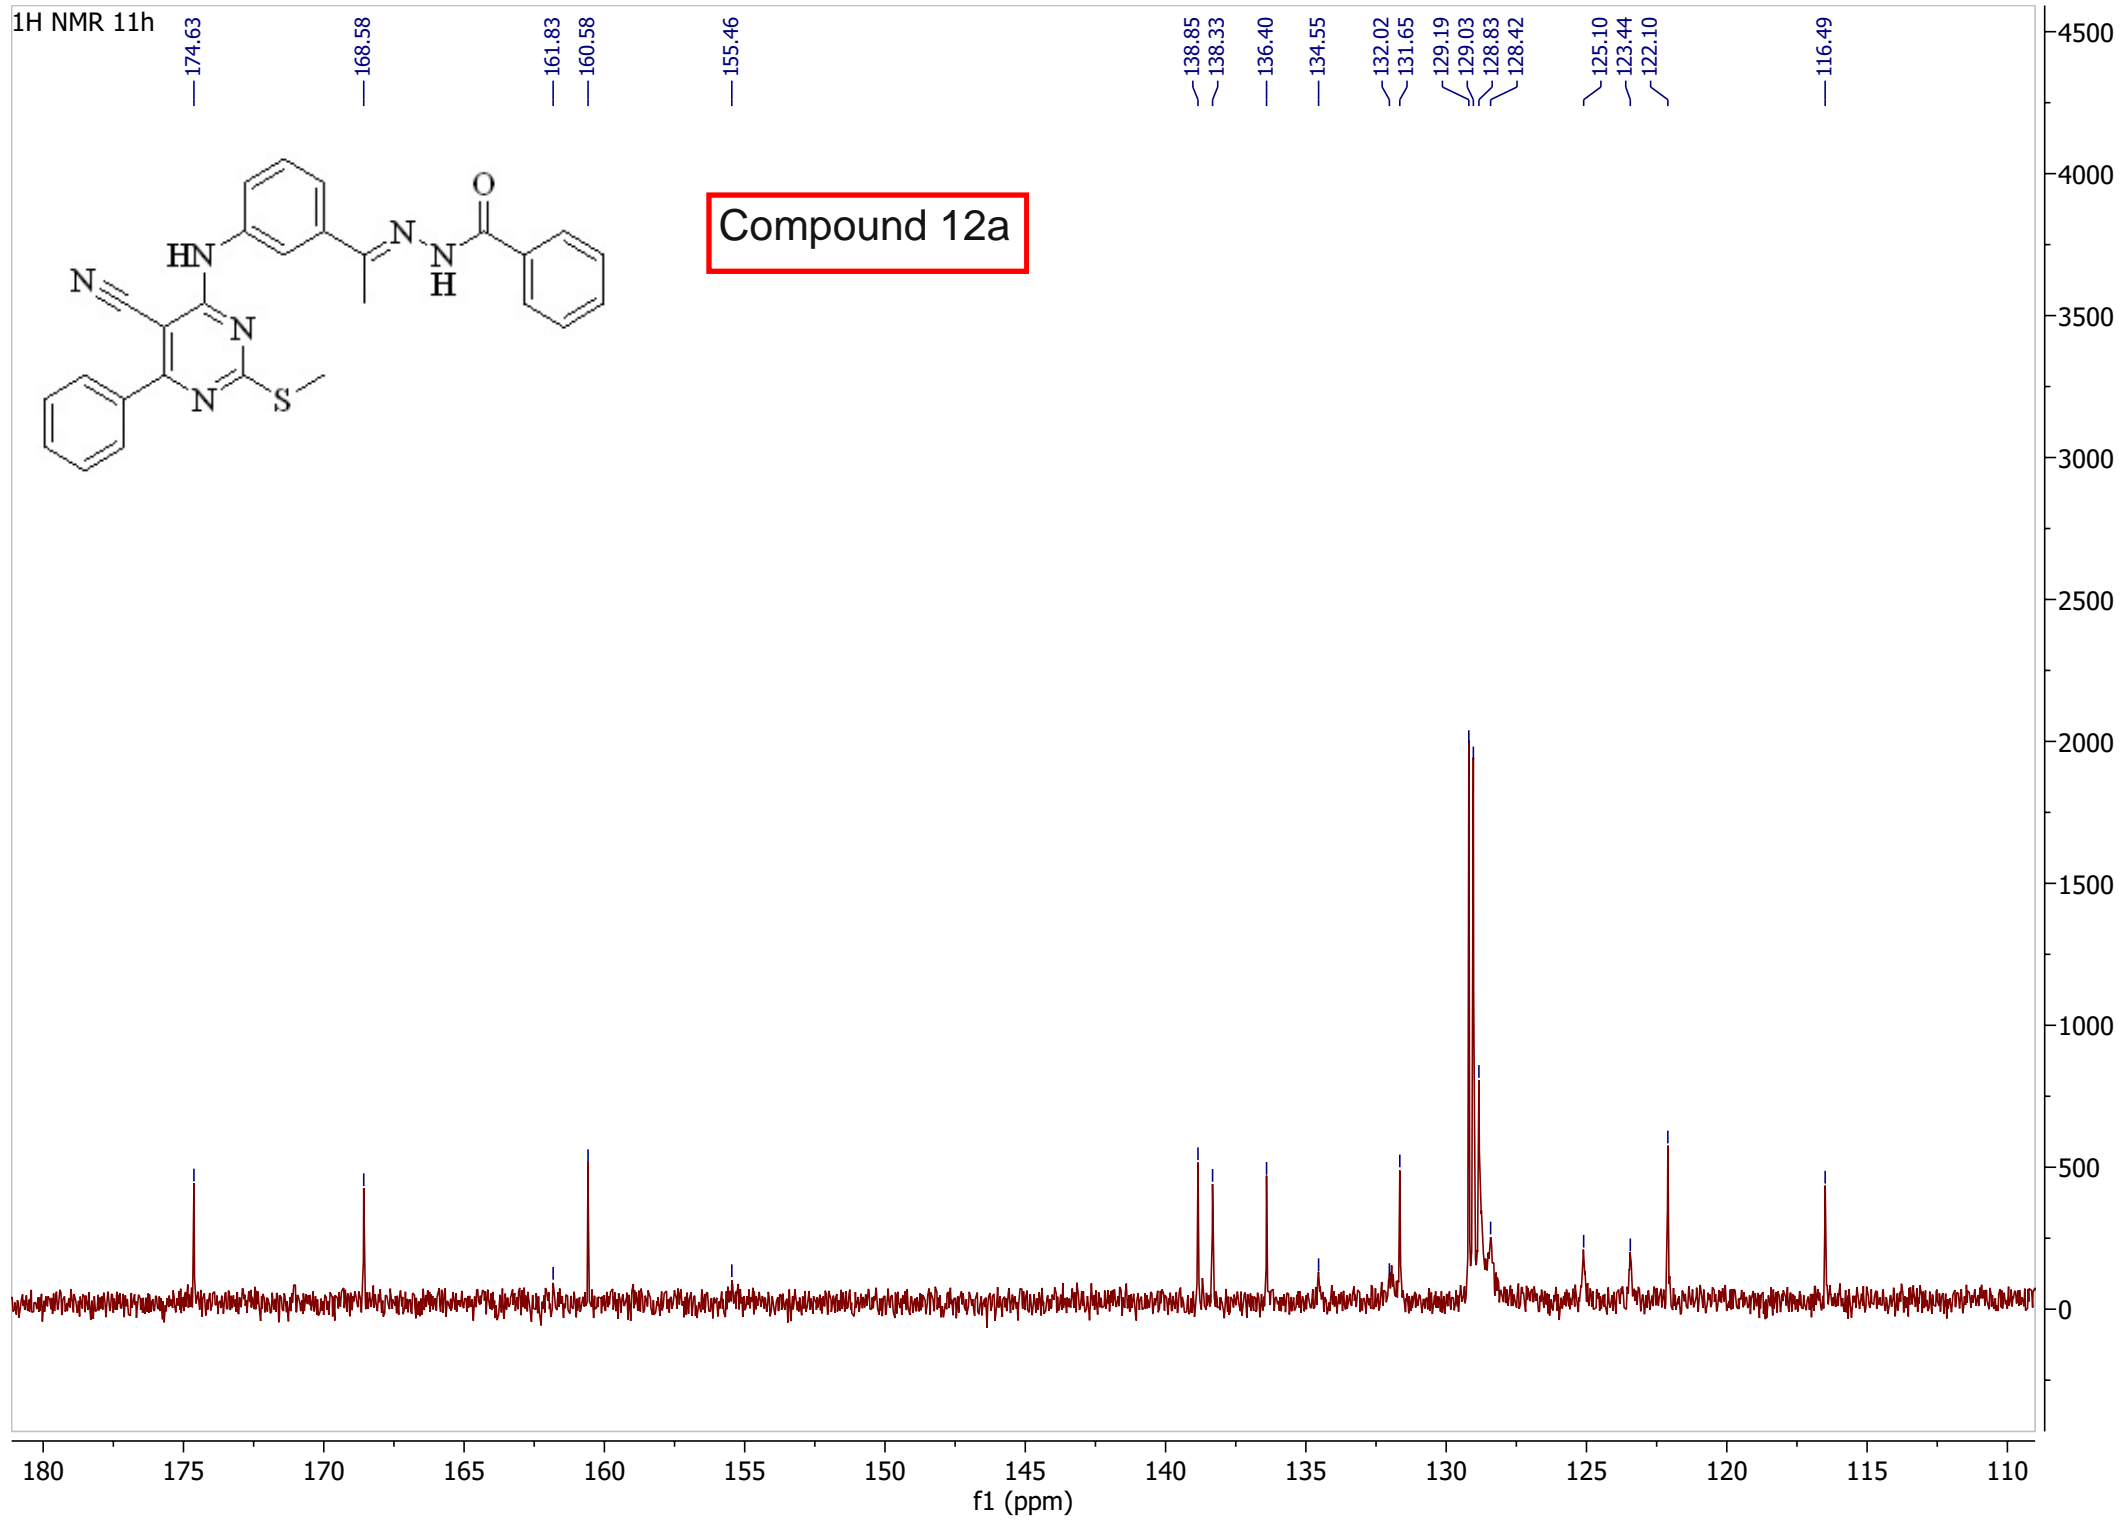

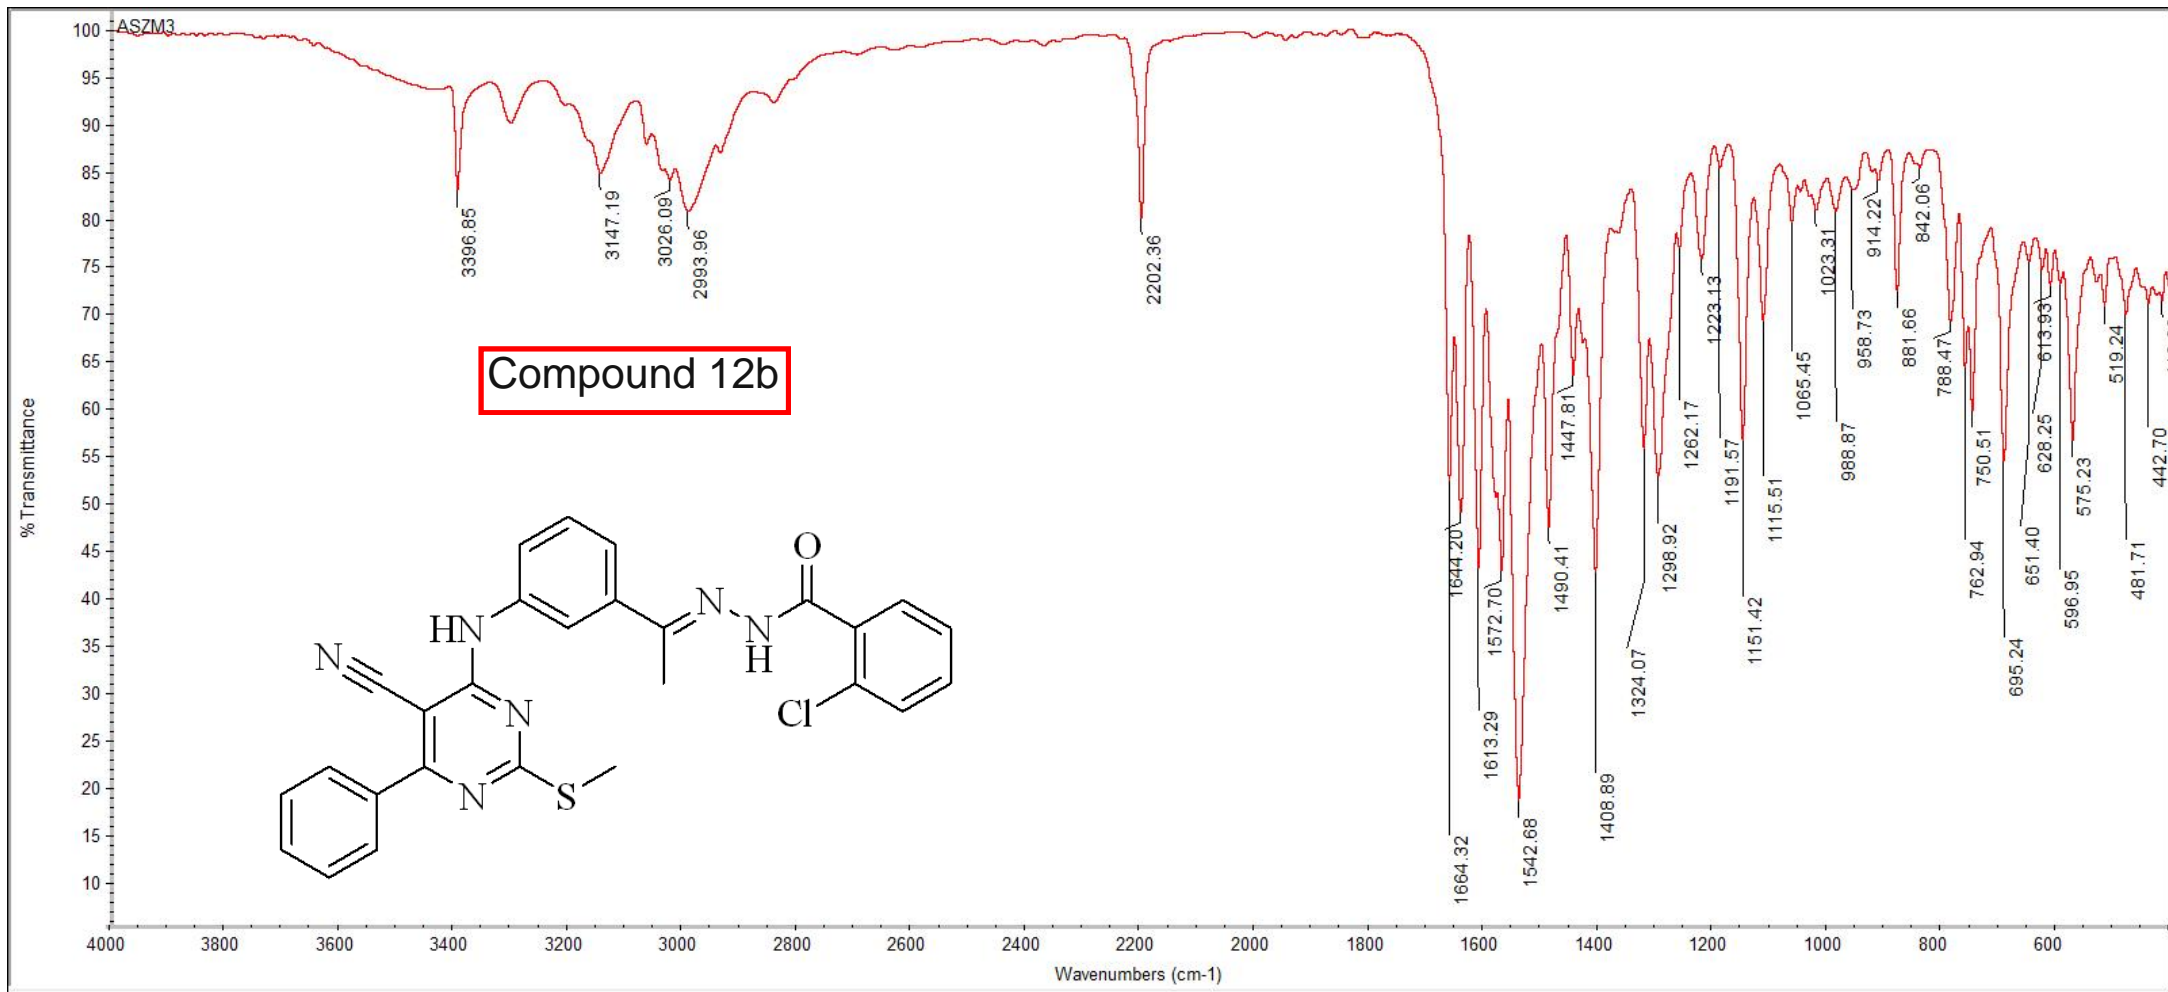

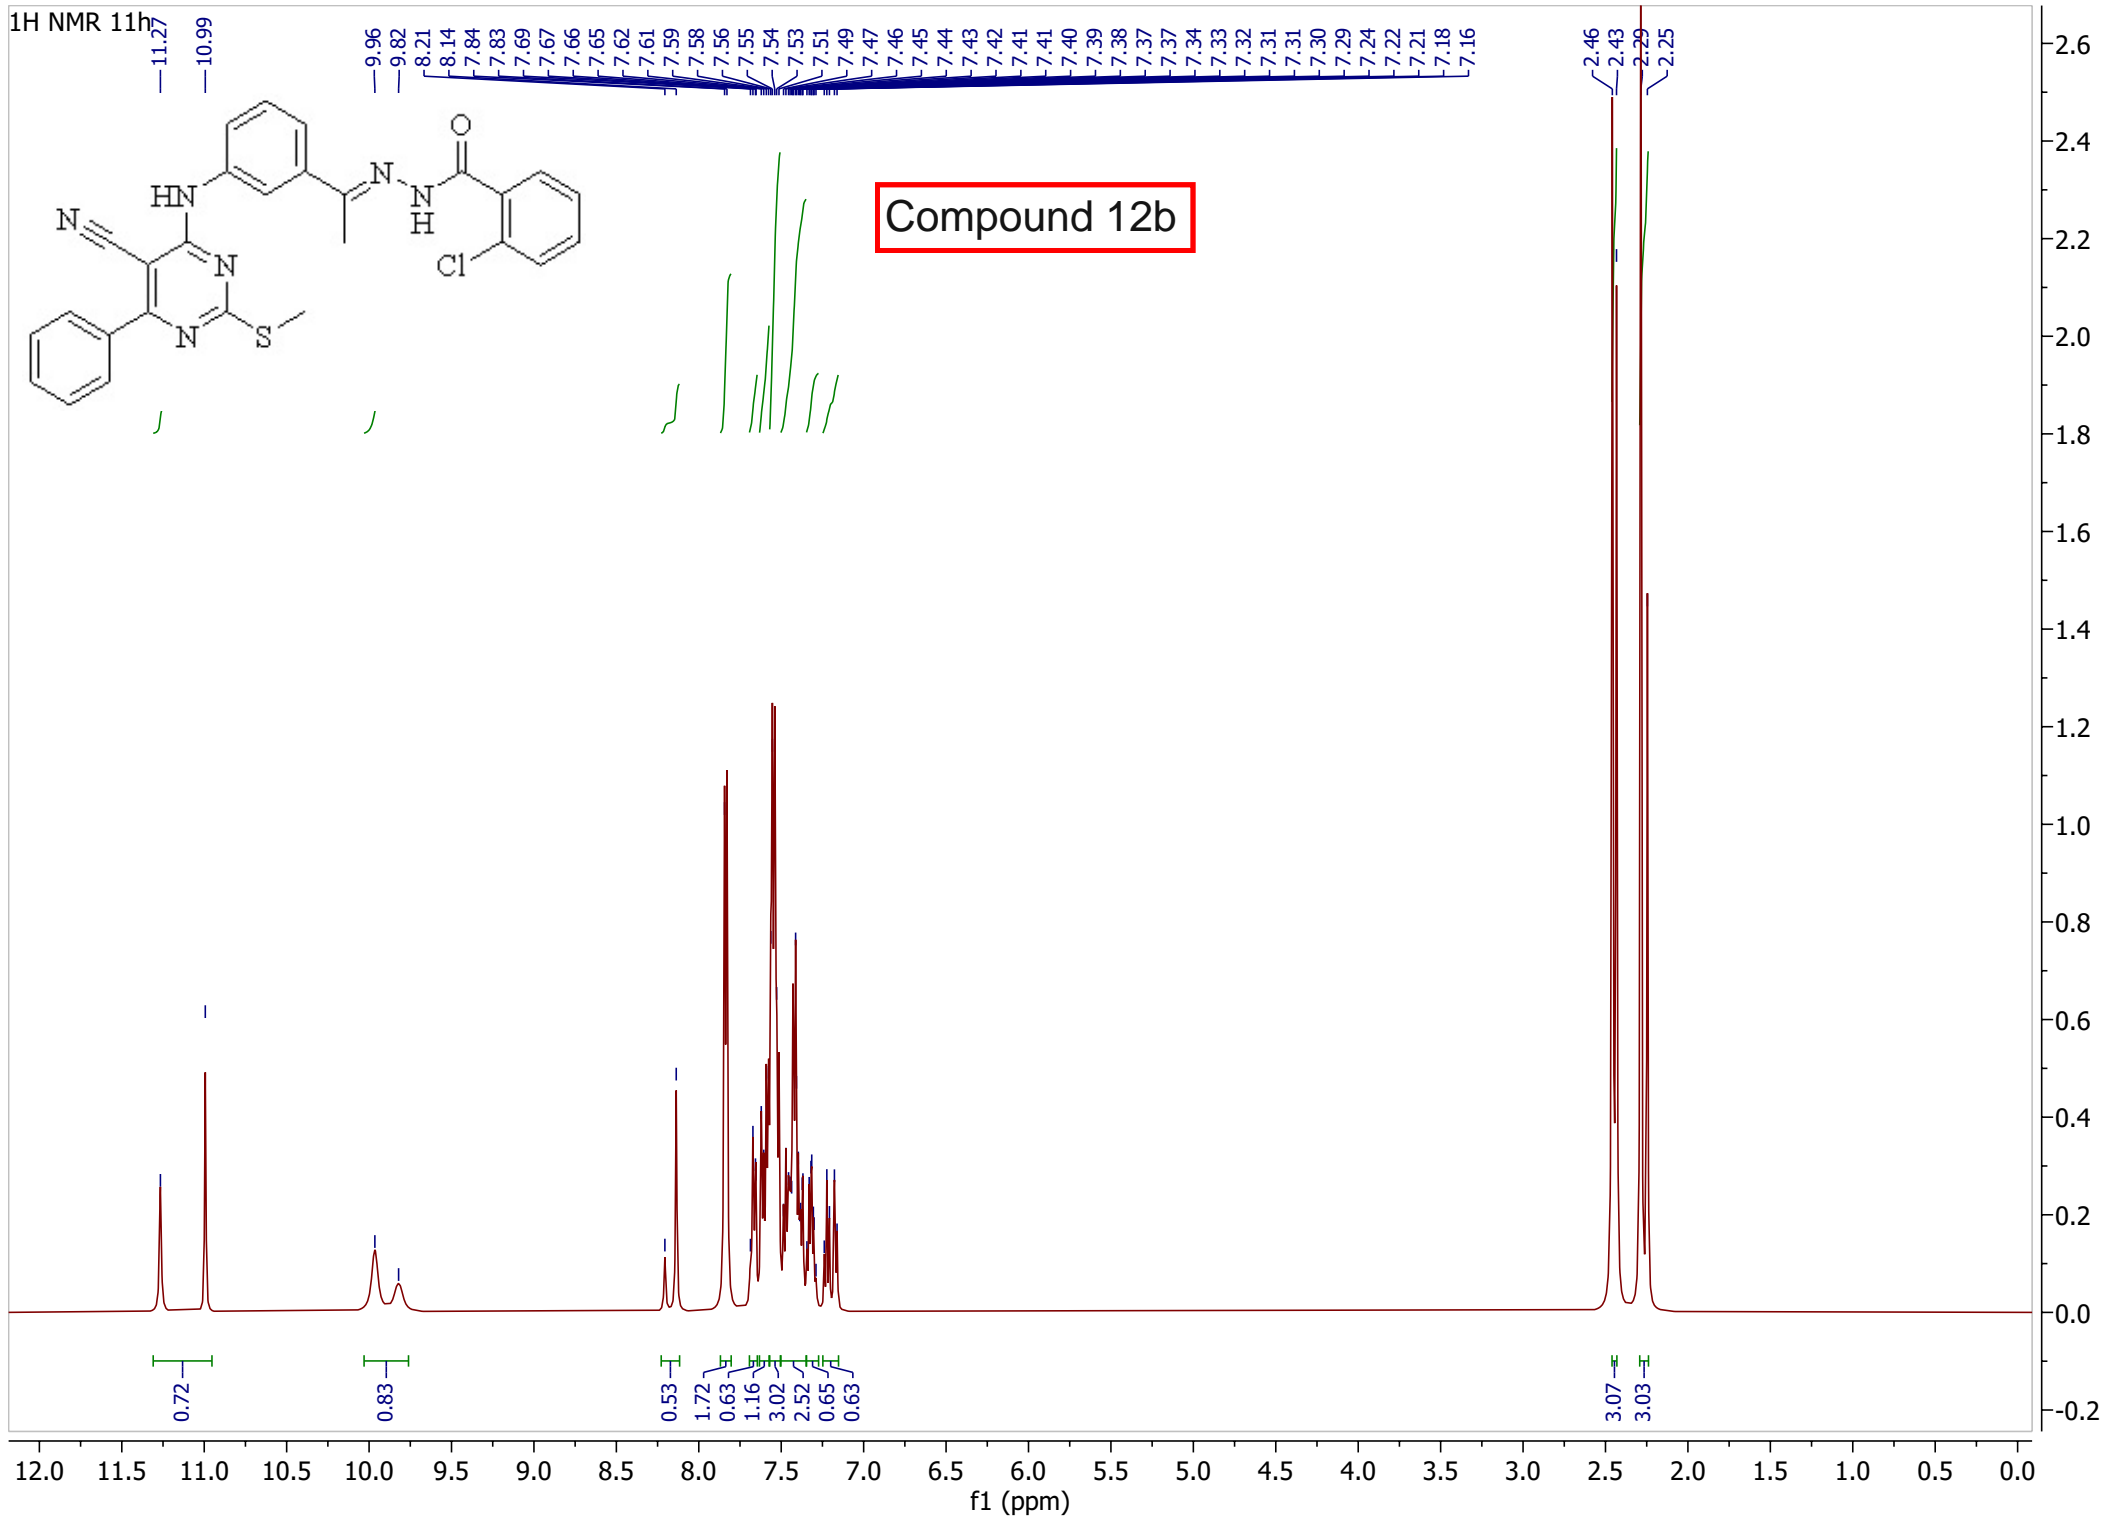

<sup>1</sup>H NMR 11h

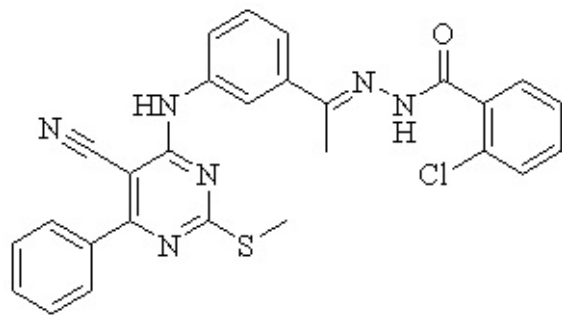

Compound 12b

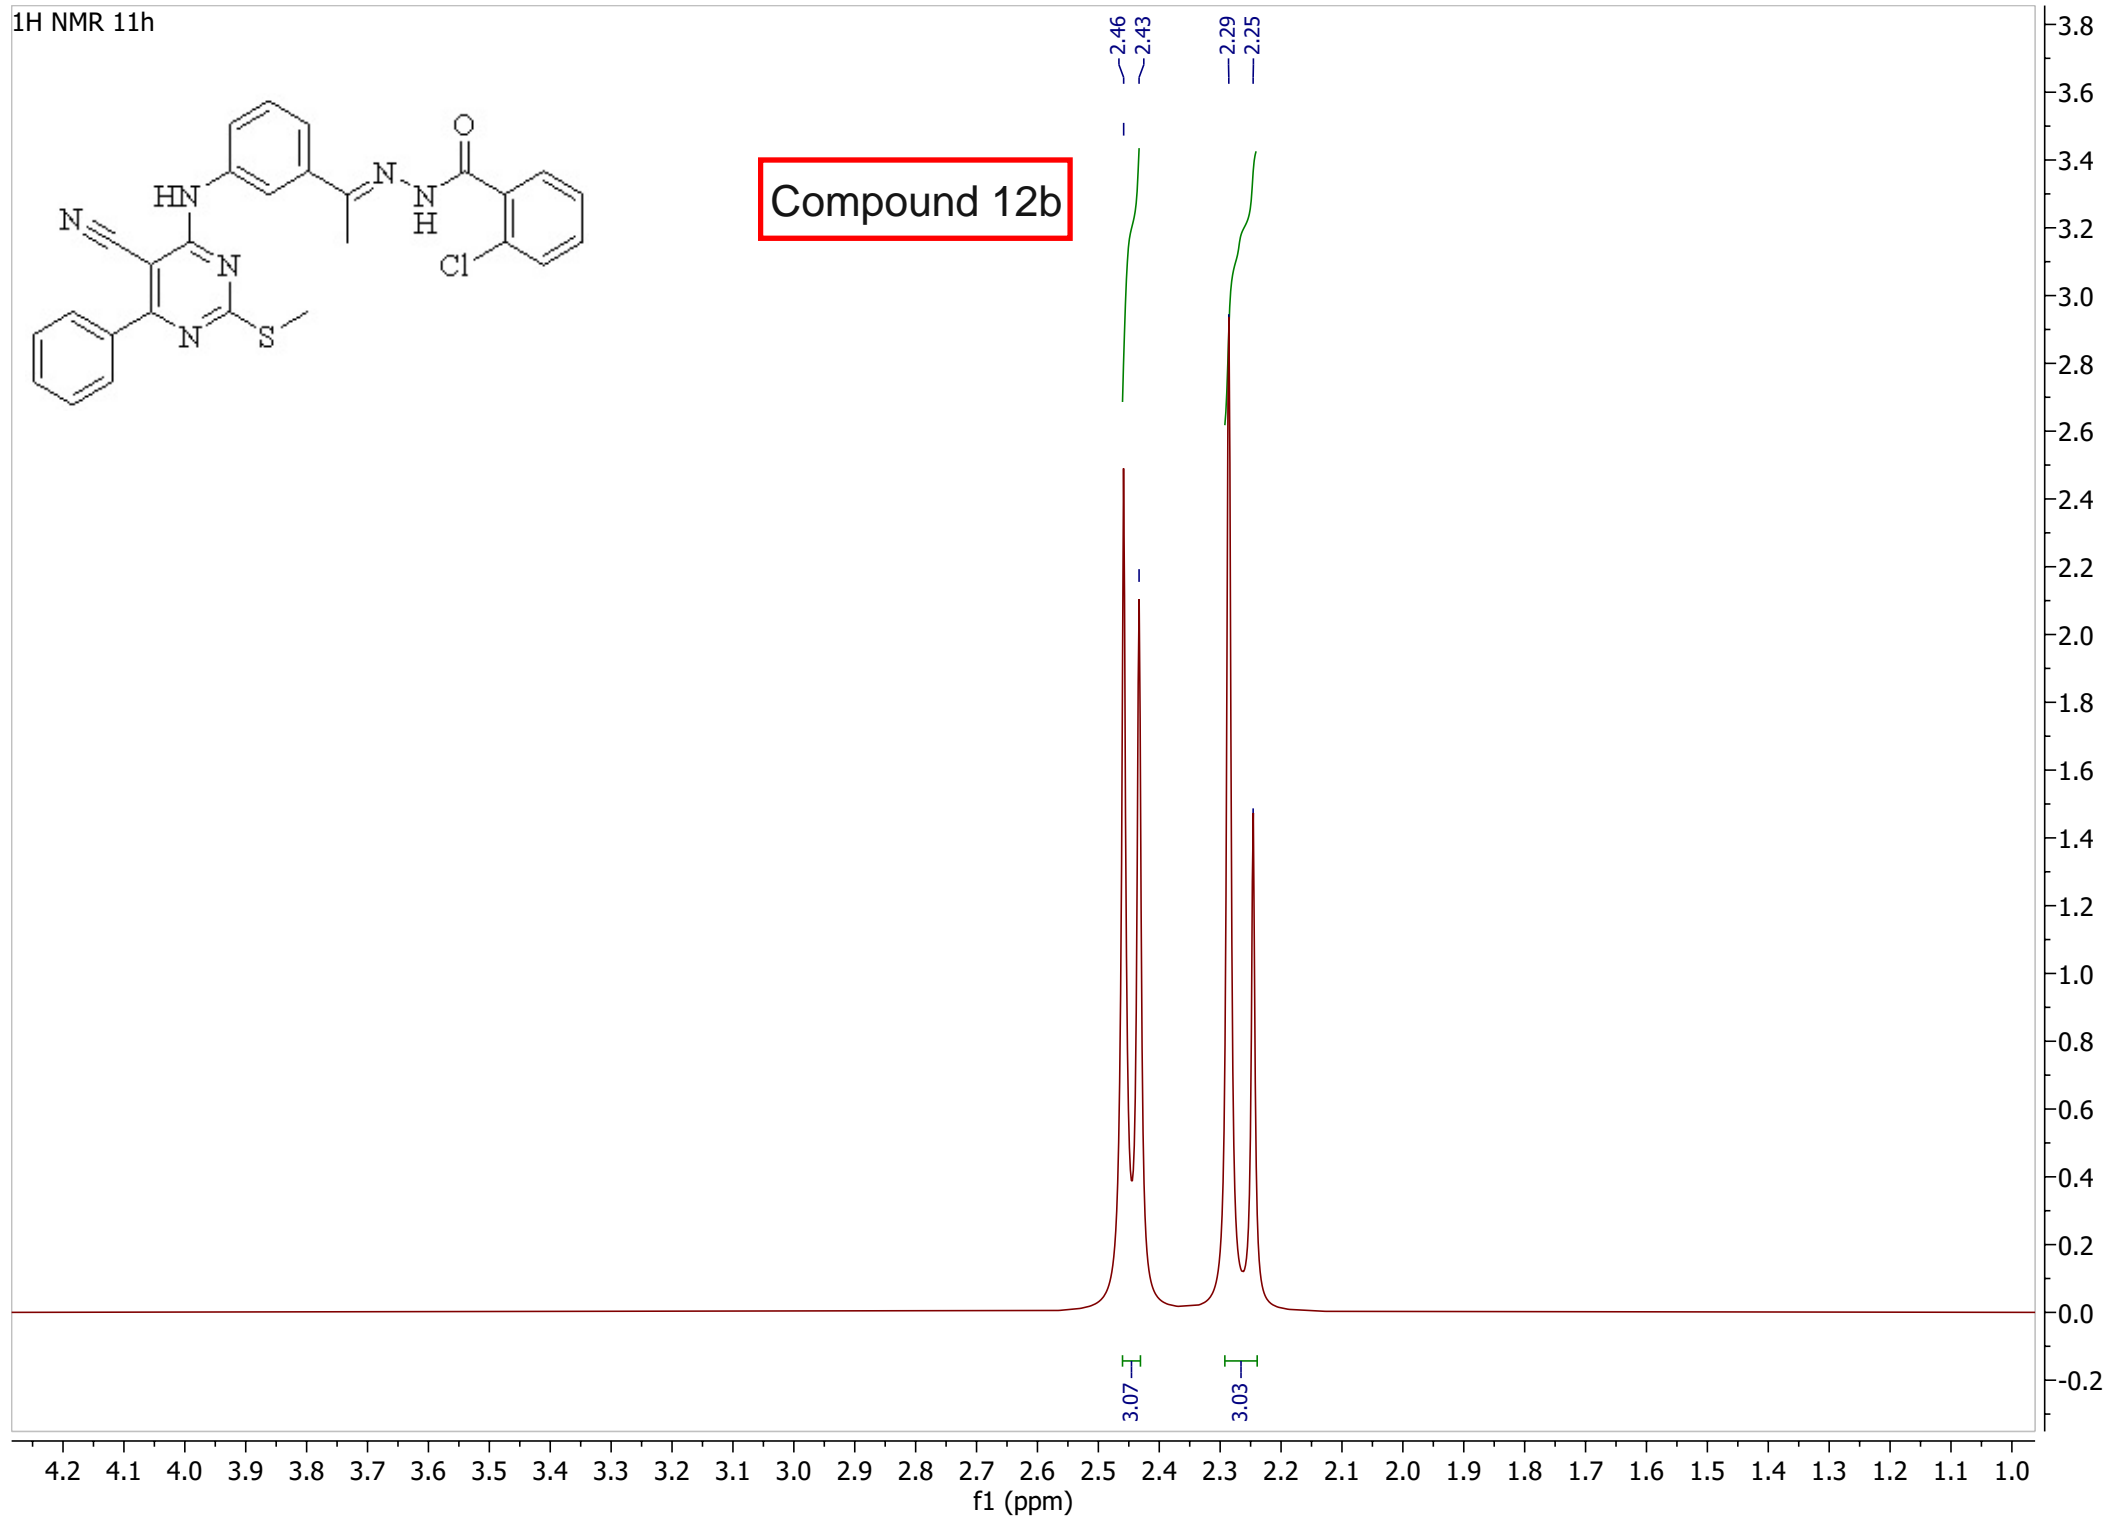

<sup>1</sup>H NMR 11h

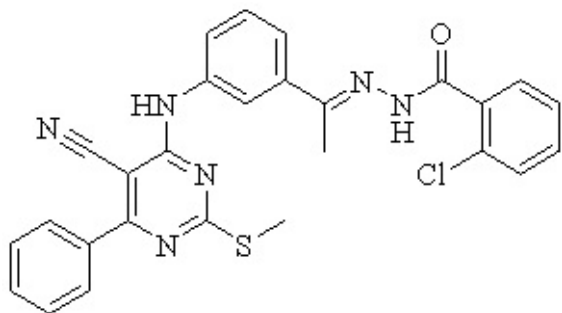

Compound 12b

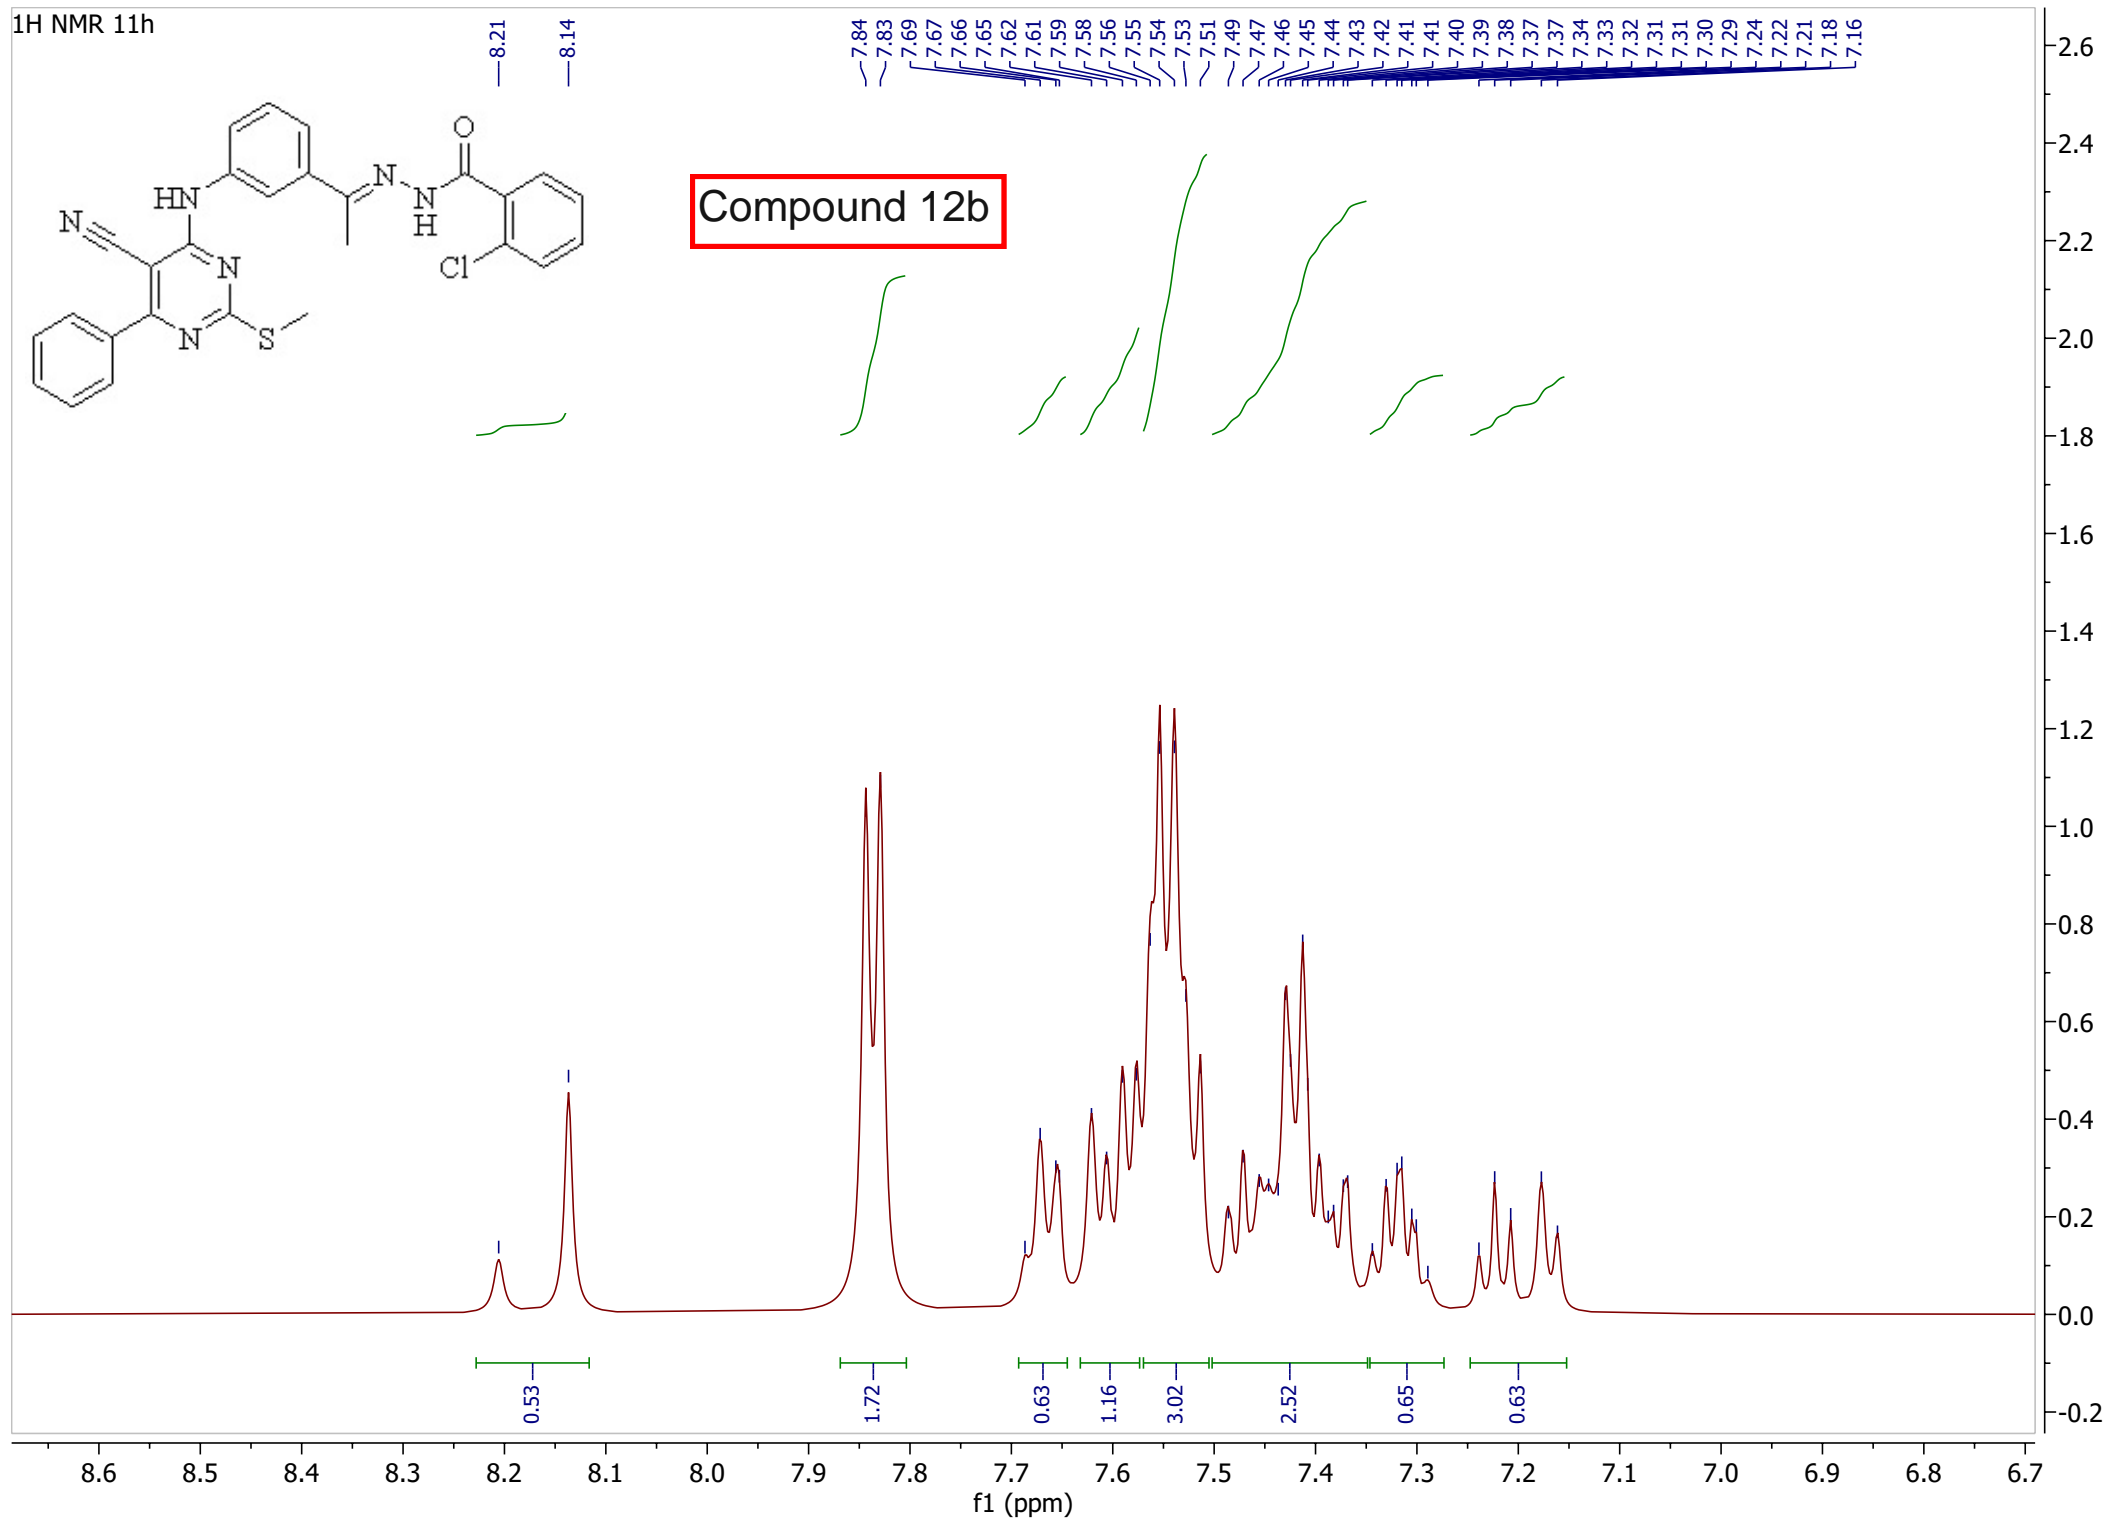

<sup>1</sup>H NMR 11h

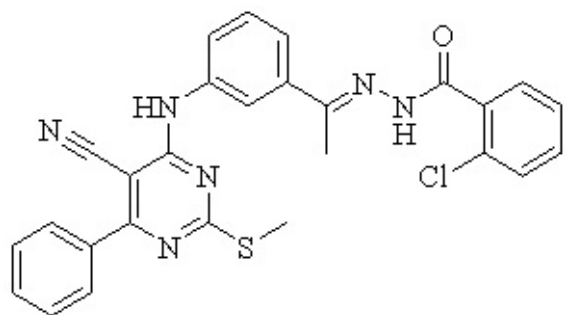

Compound 12b

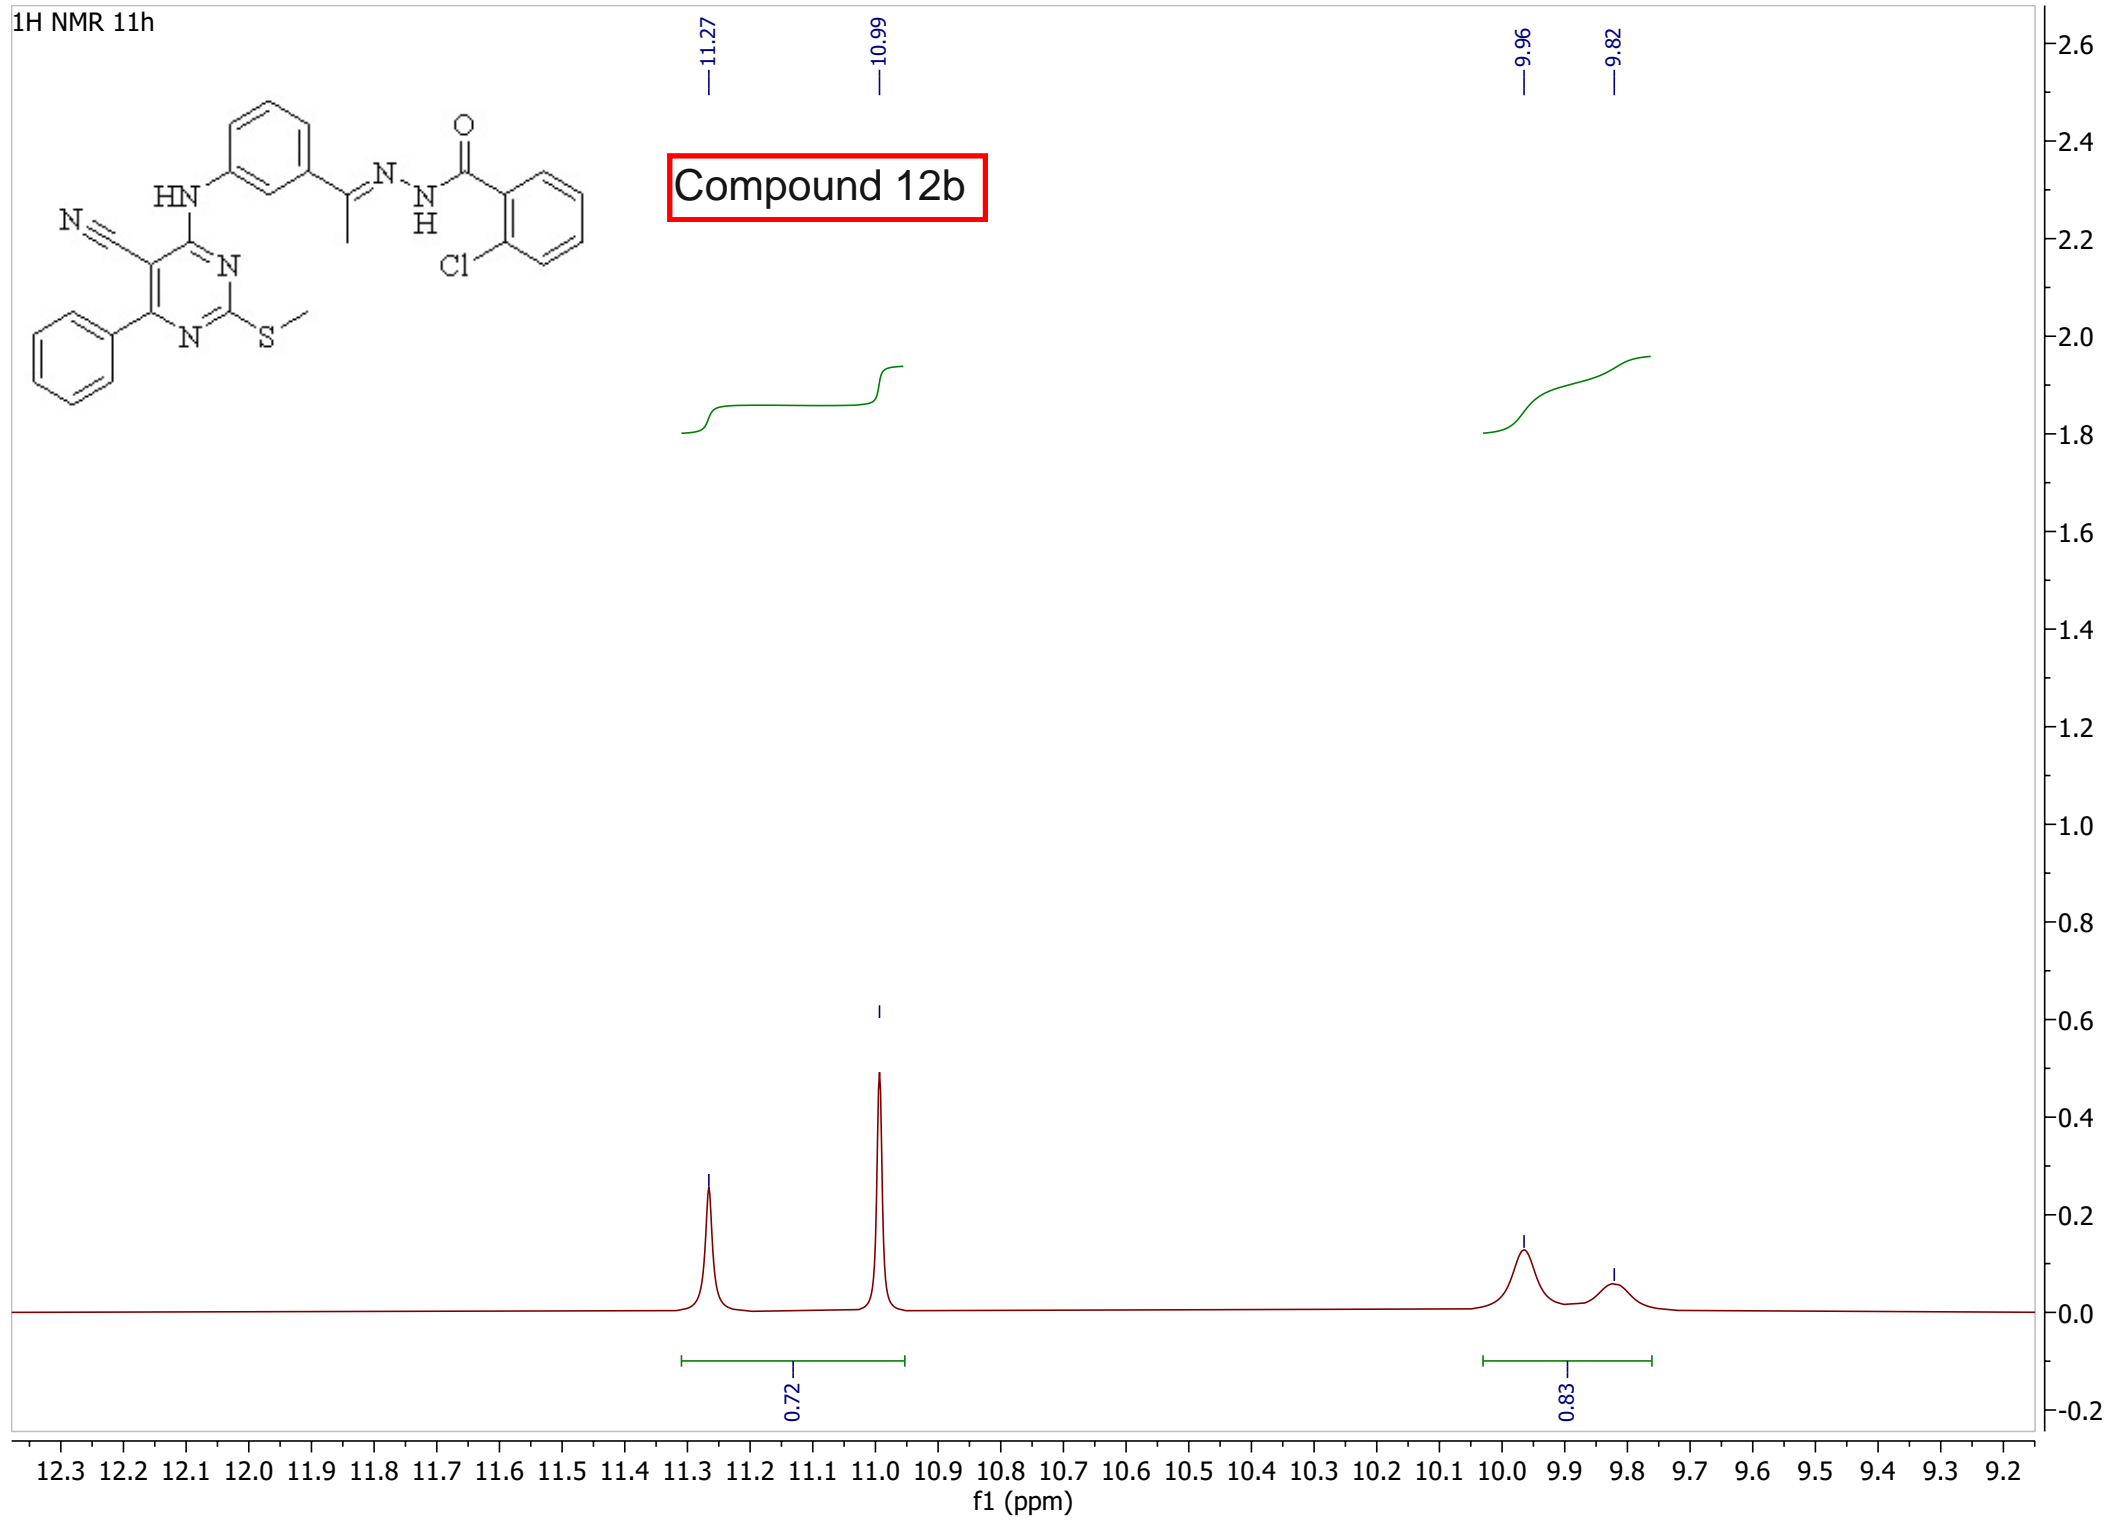



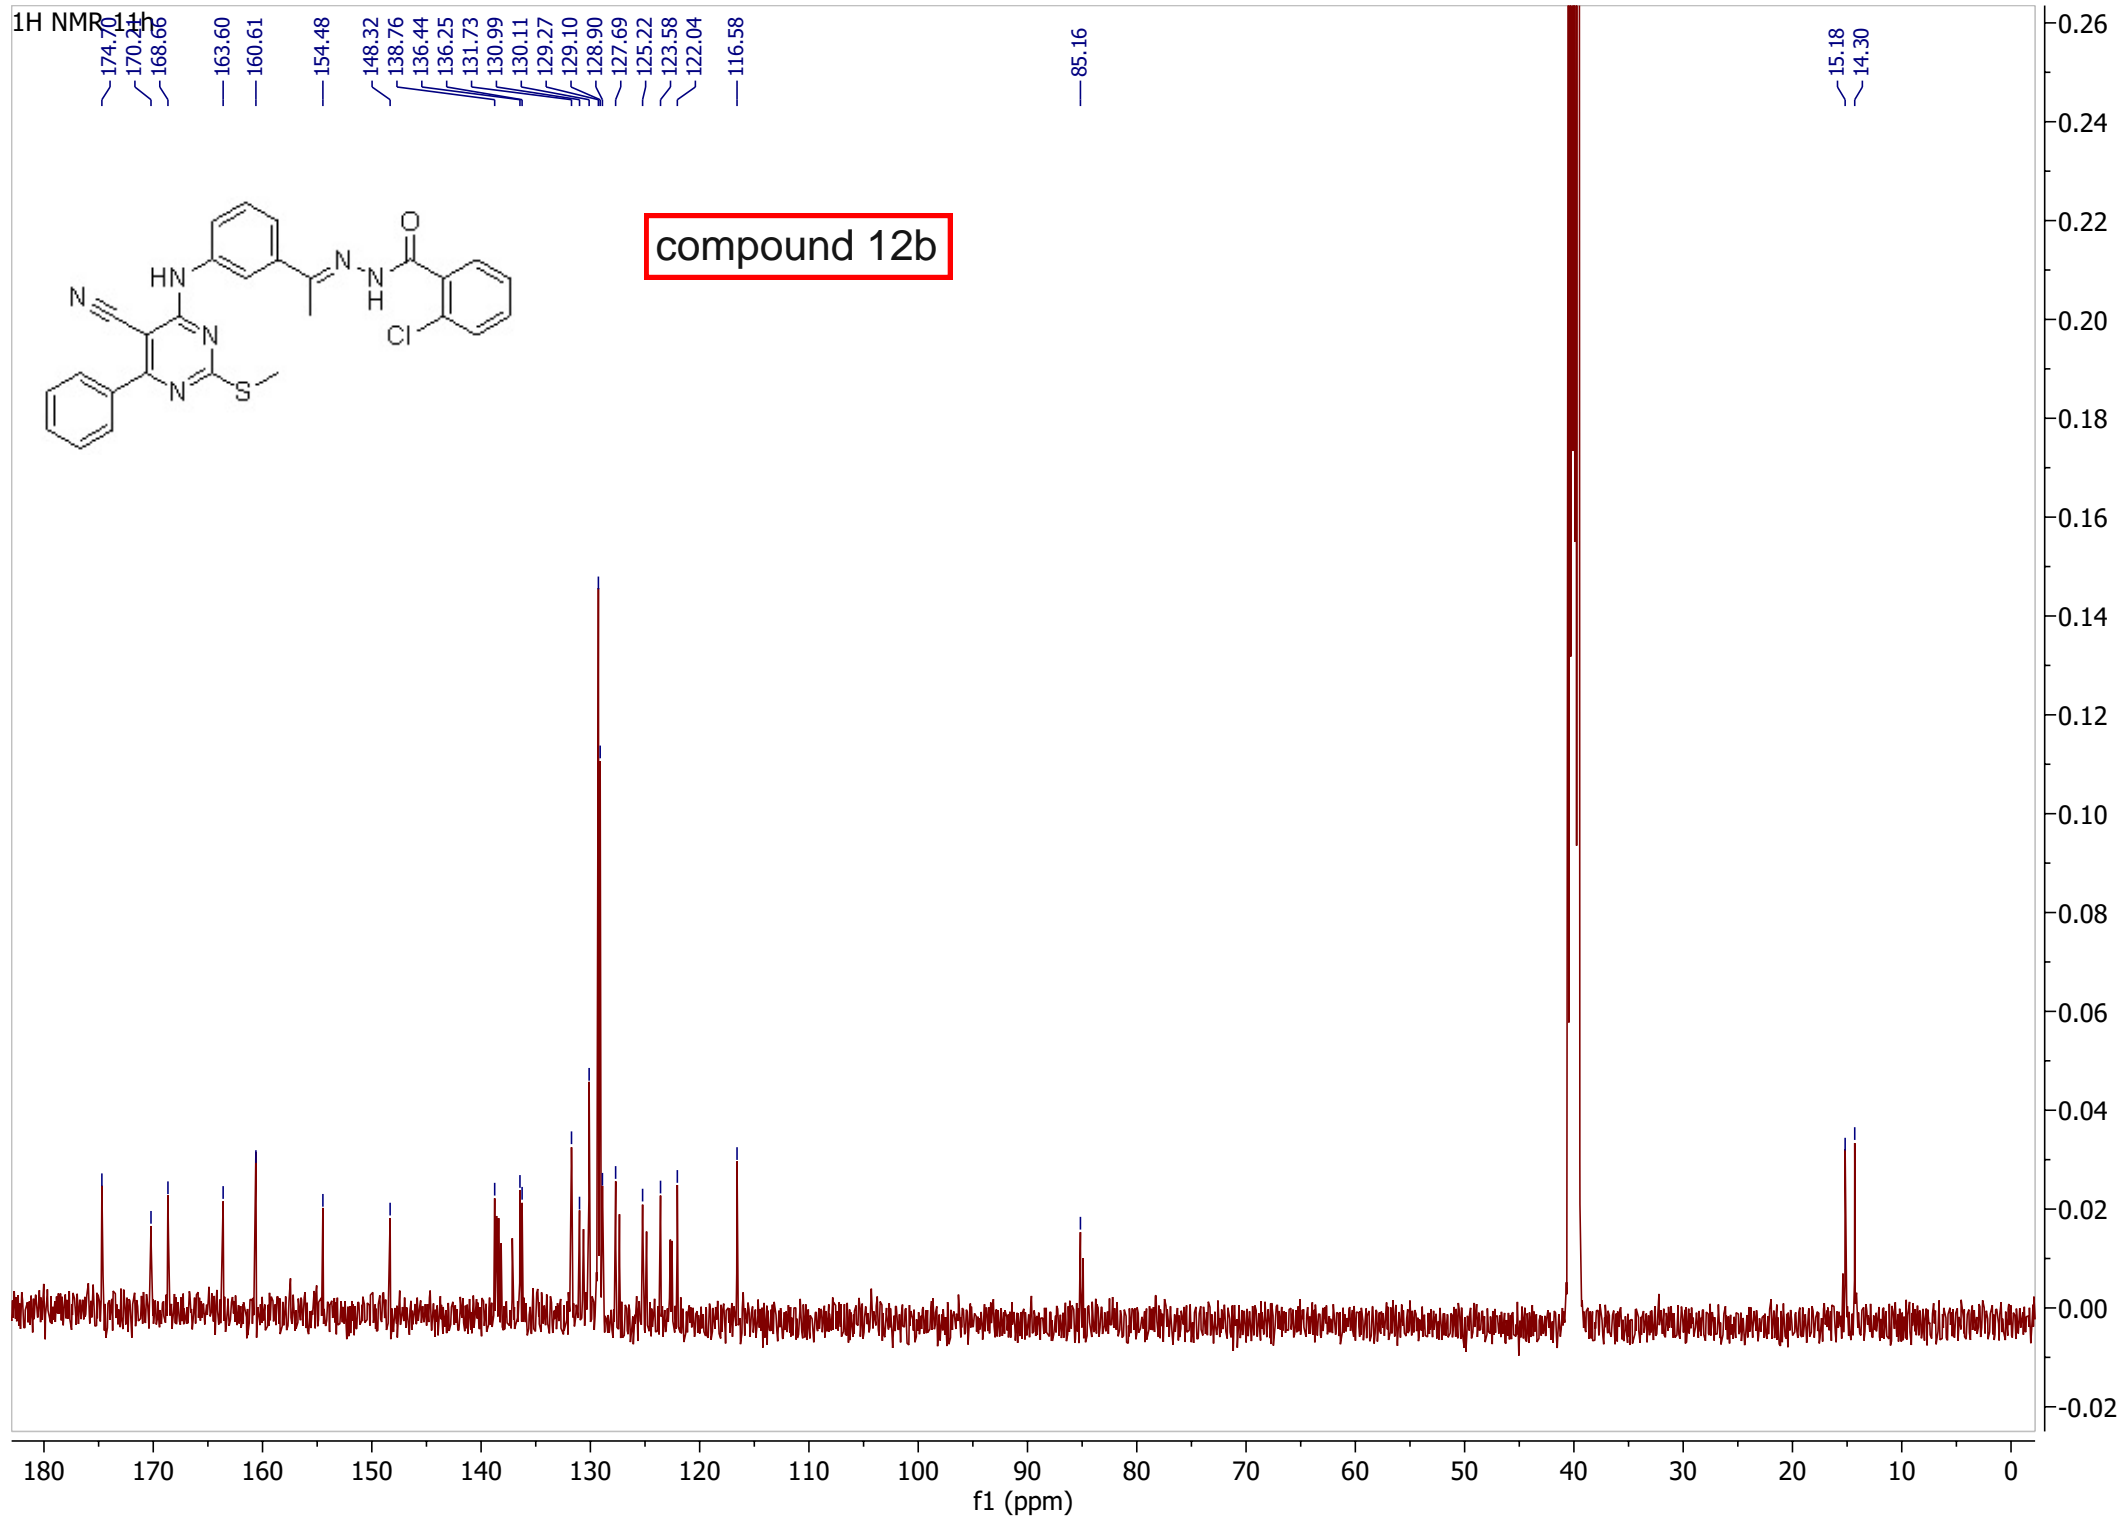

<sup>1</sup>H NMR 11b

compound 12b

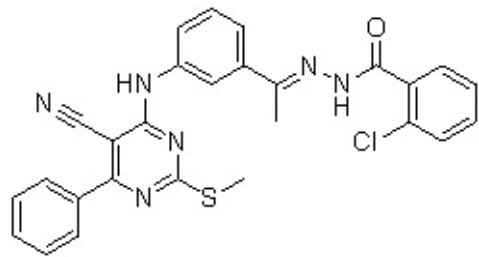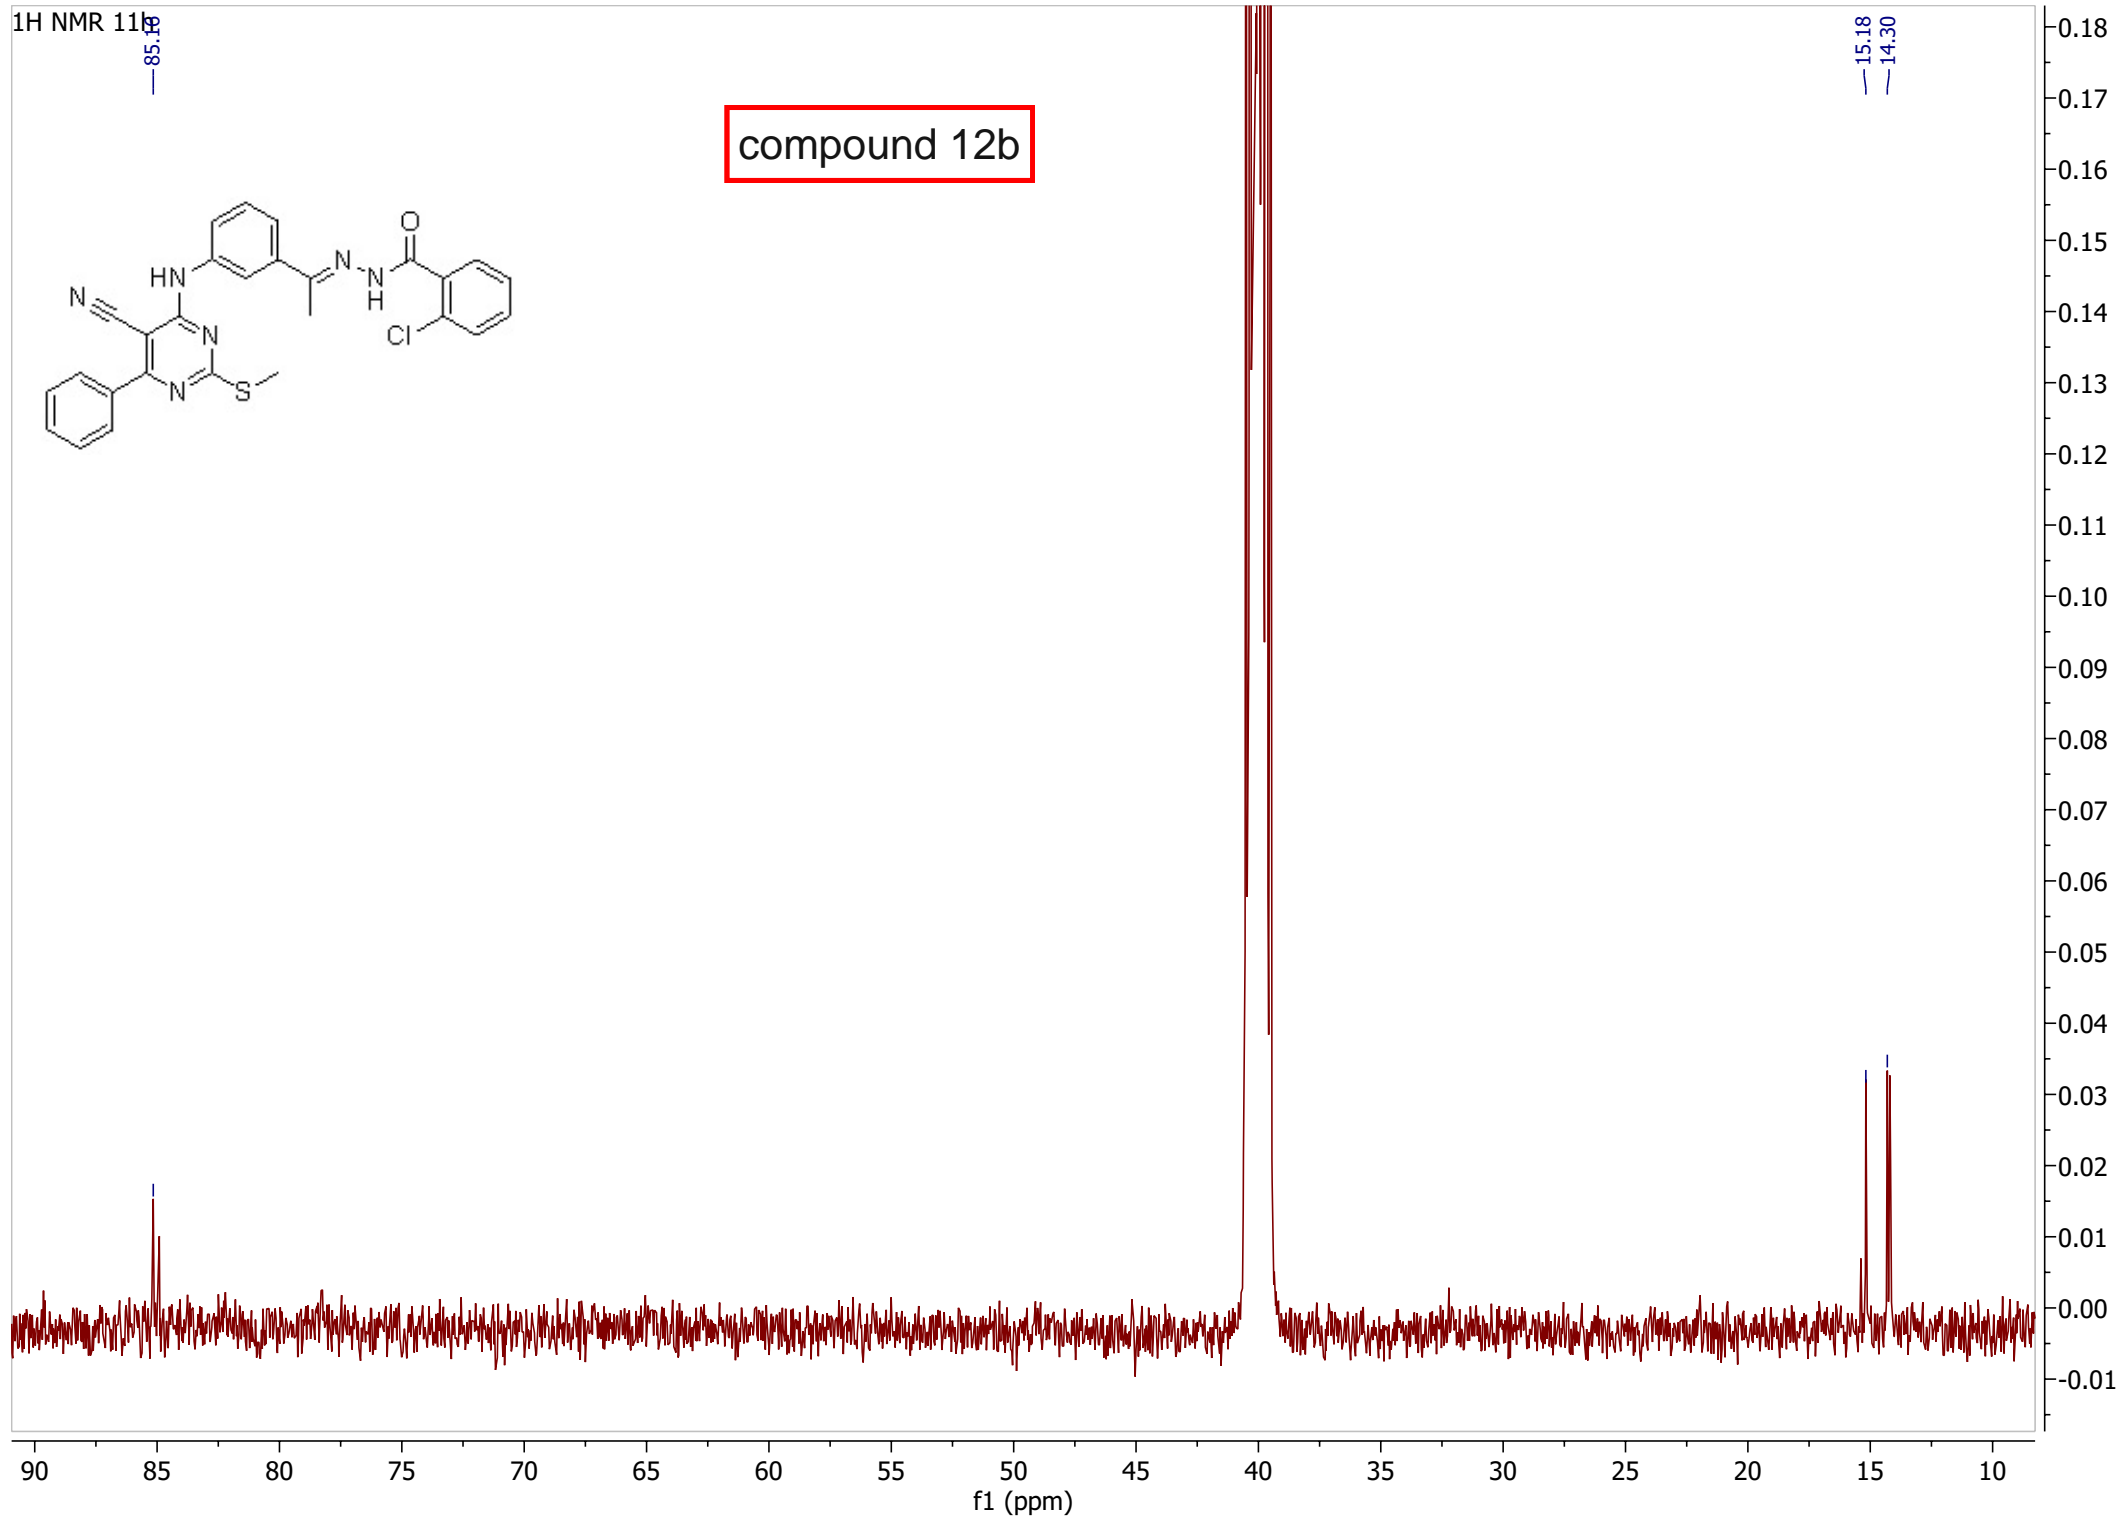

<sup>1</sup>H NMR 11h



compound 12b

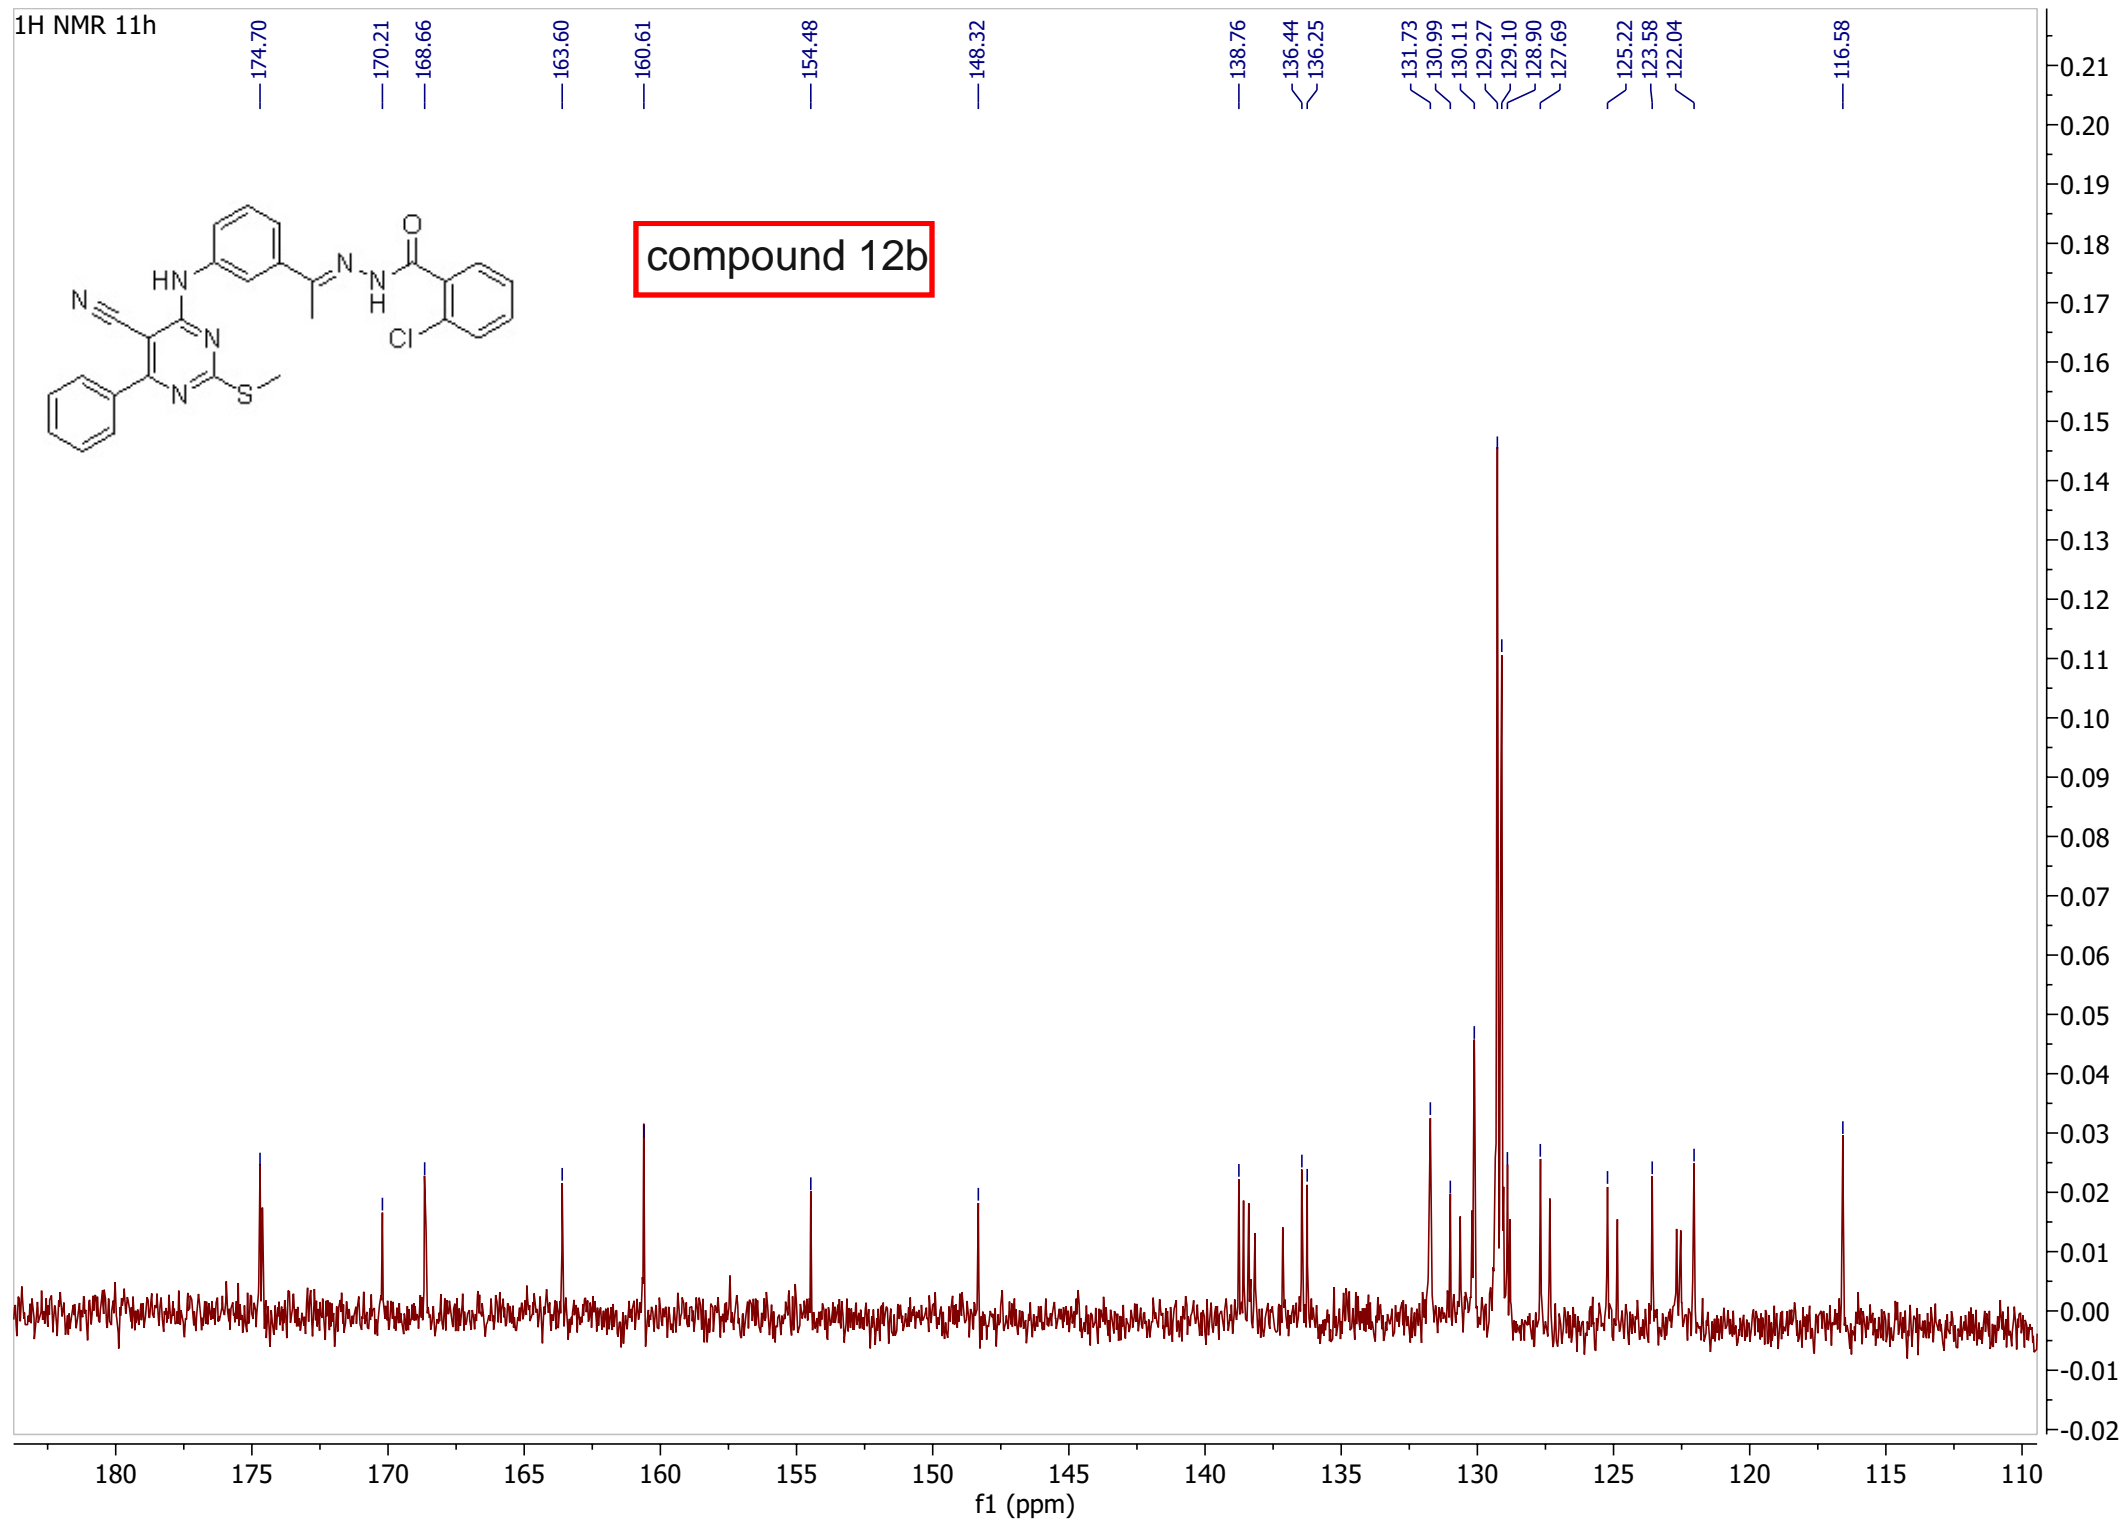

<sup>1</sup>H NMR 11h

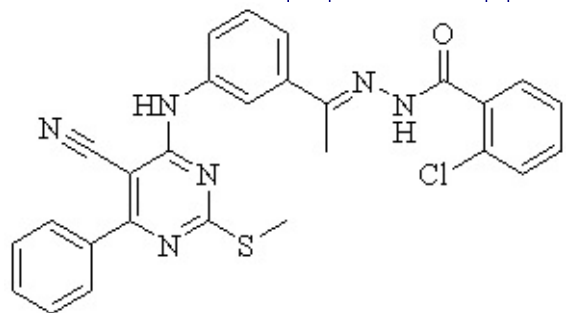

compound 12b

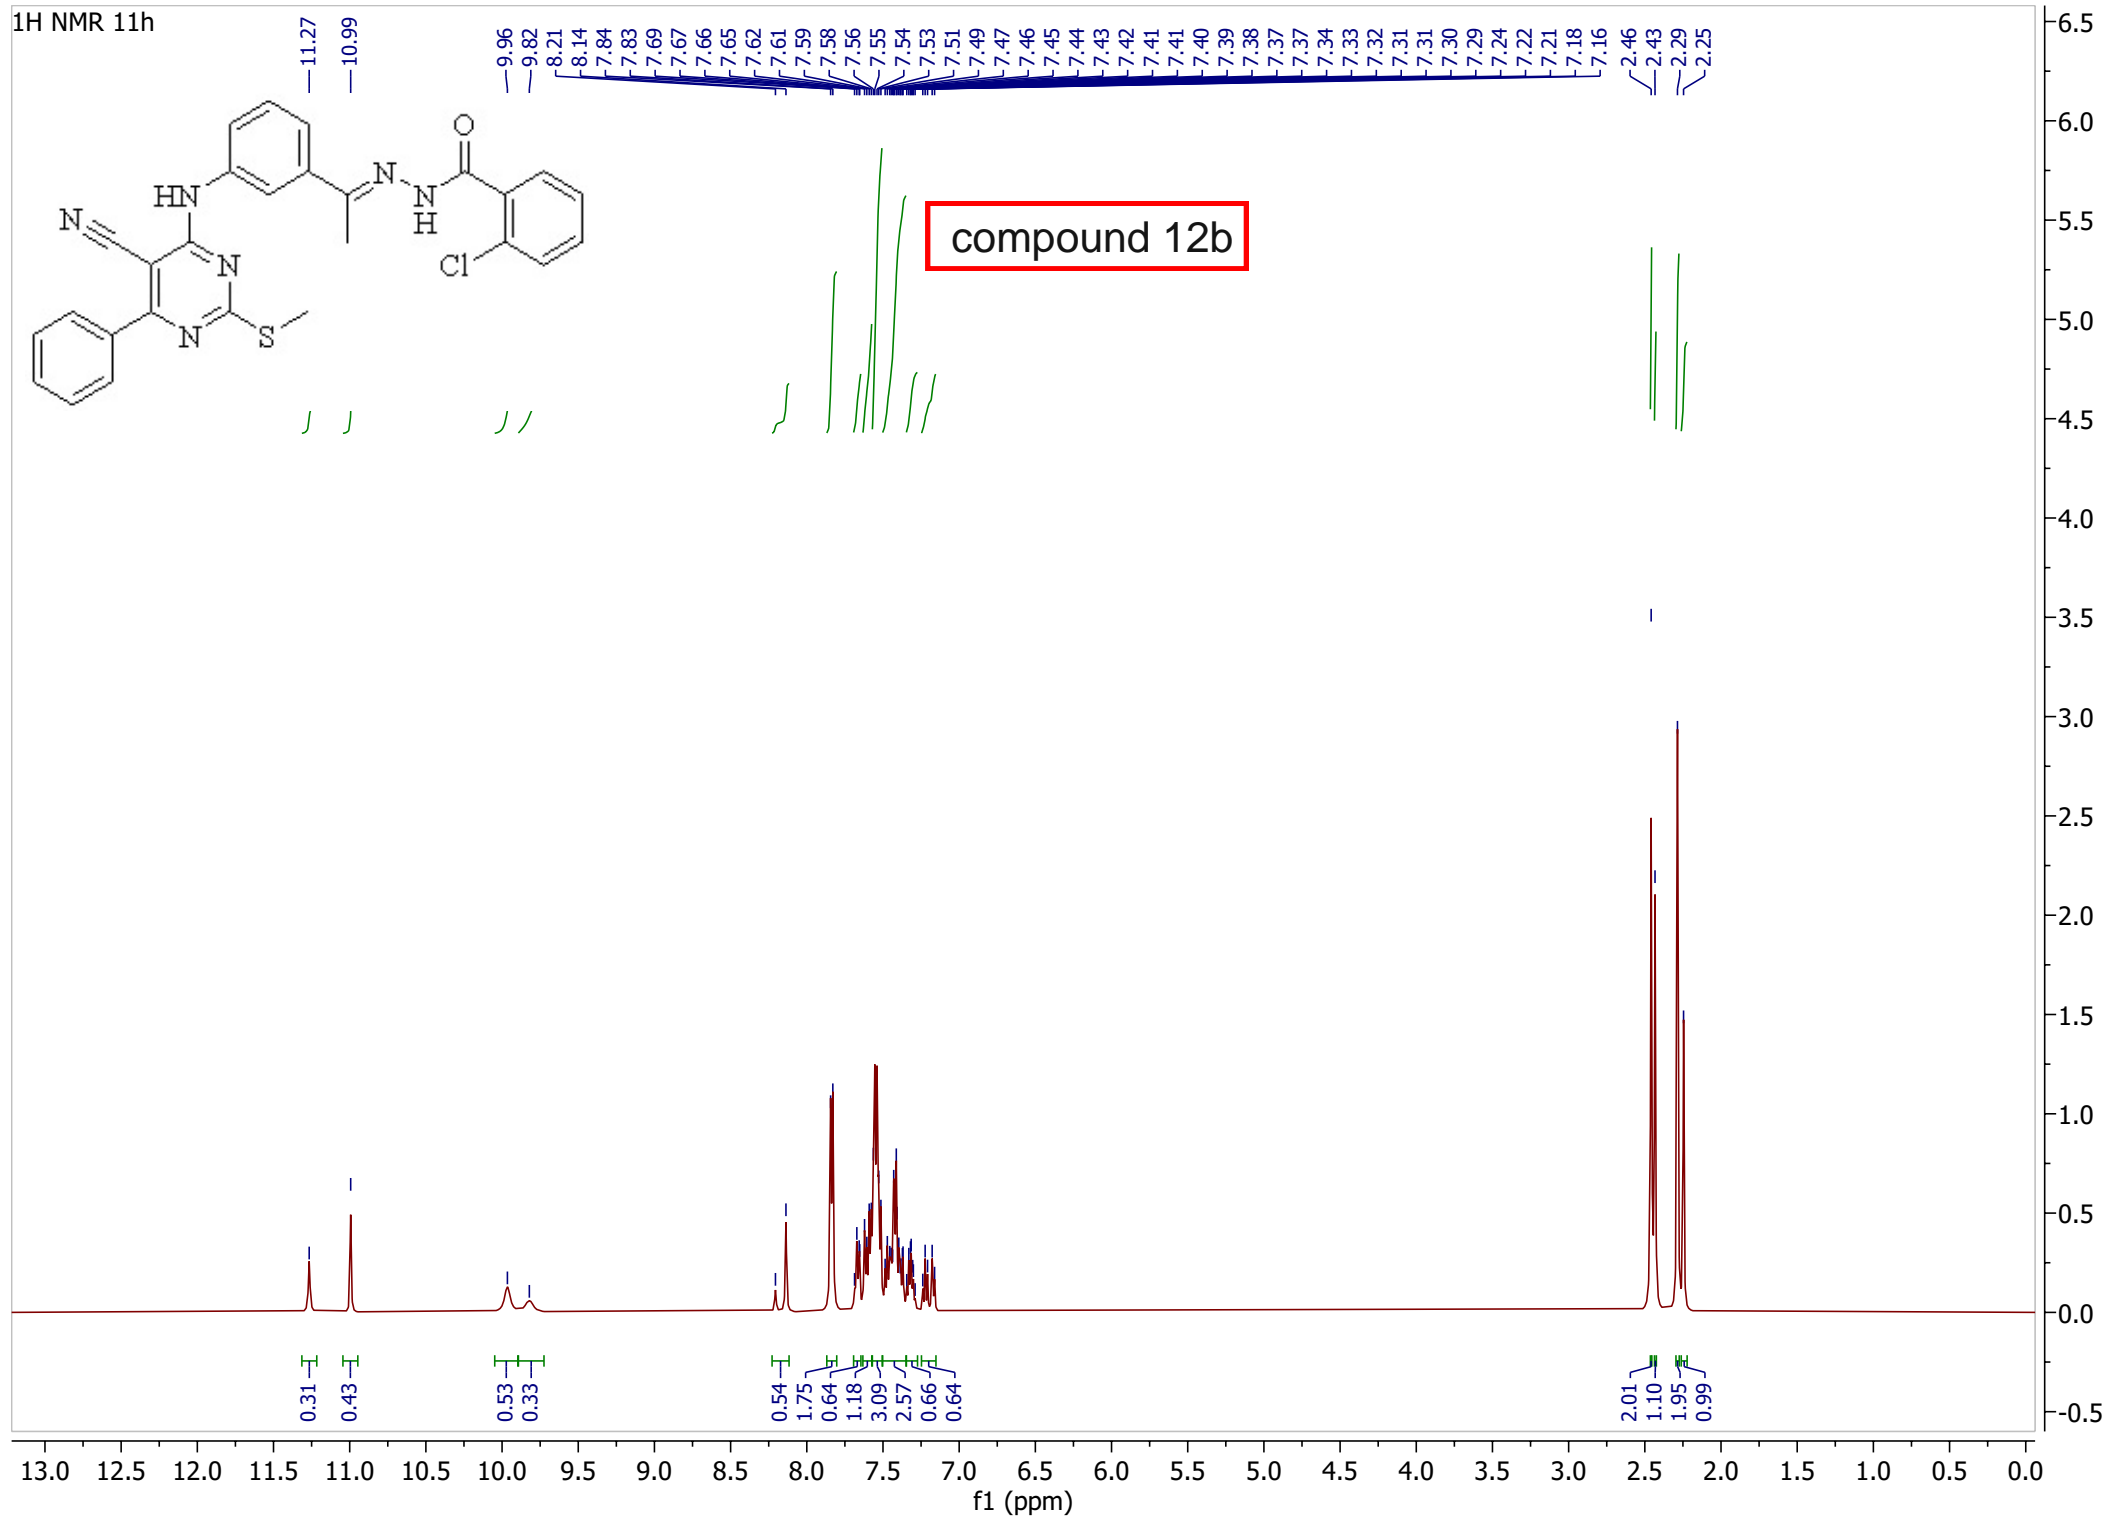

<sup>1</sup>H NMR 11h

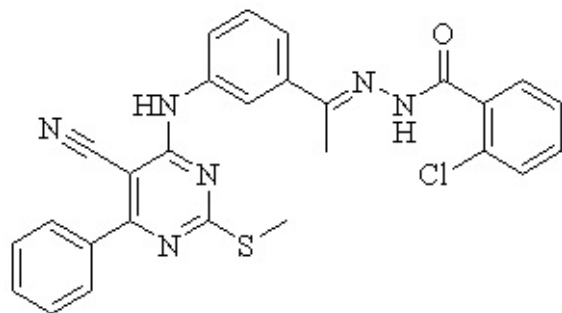

compound 12b

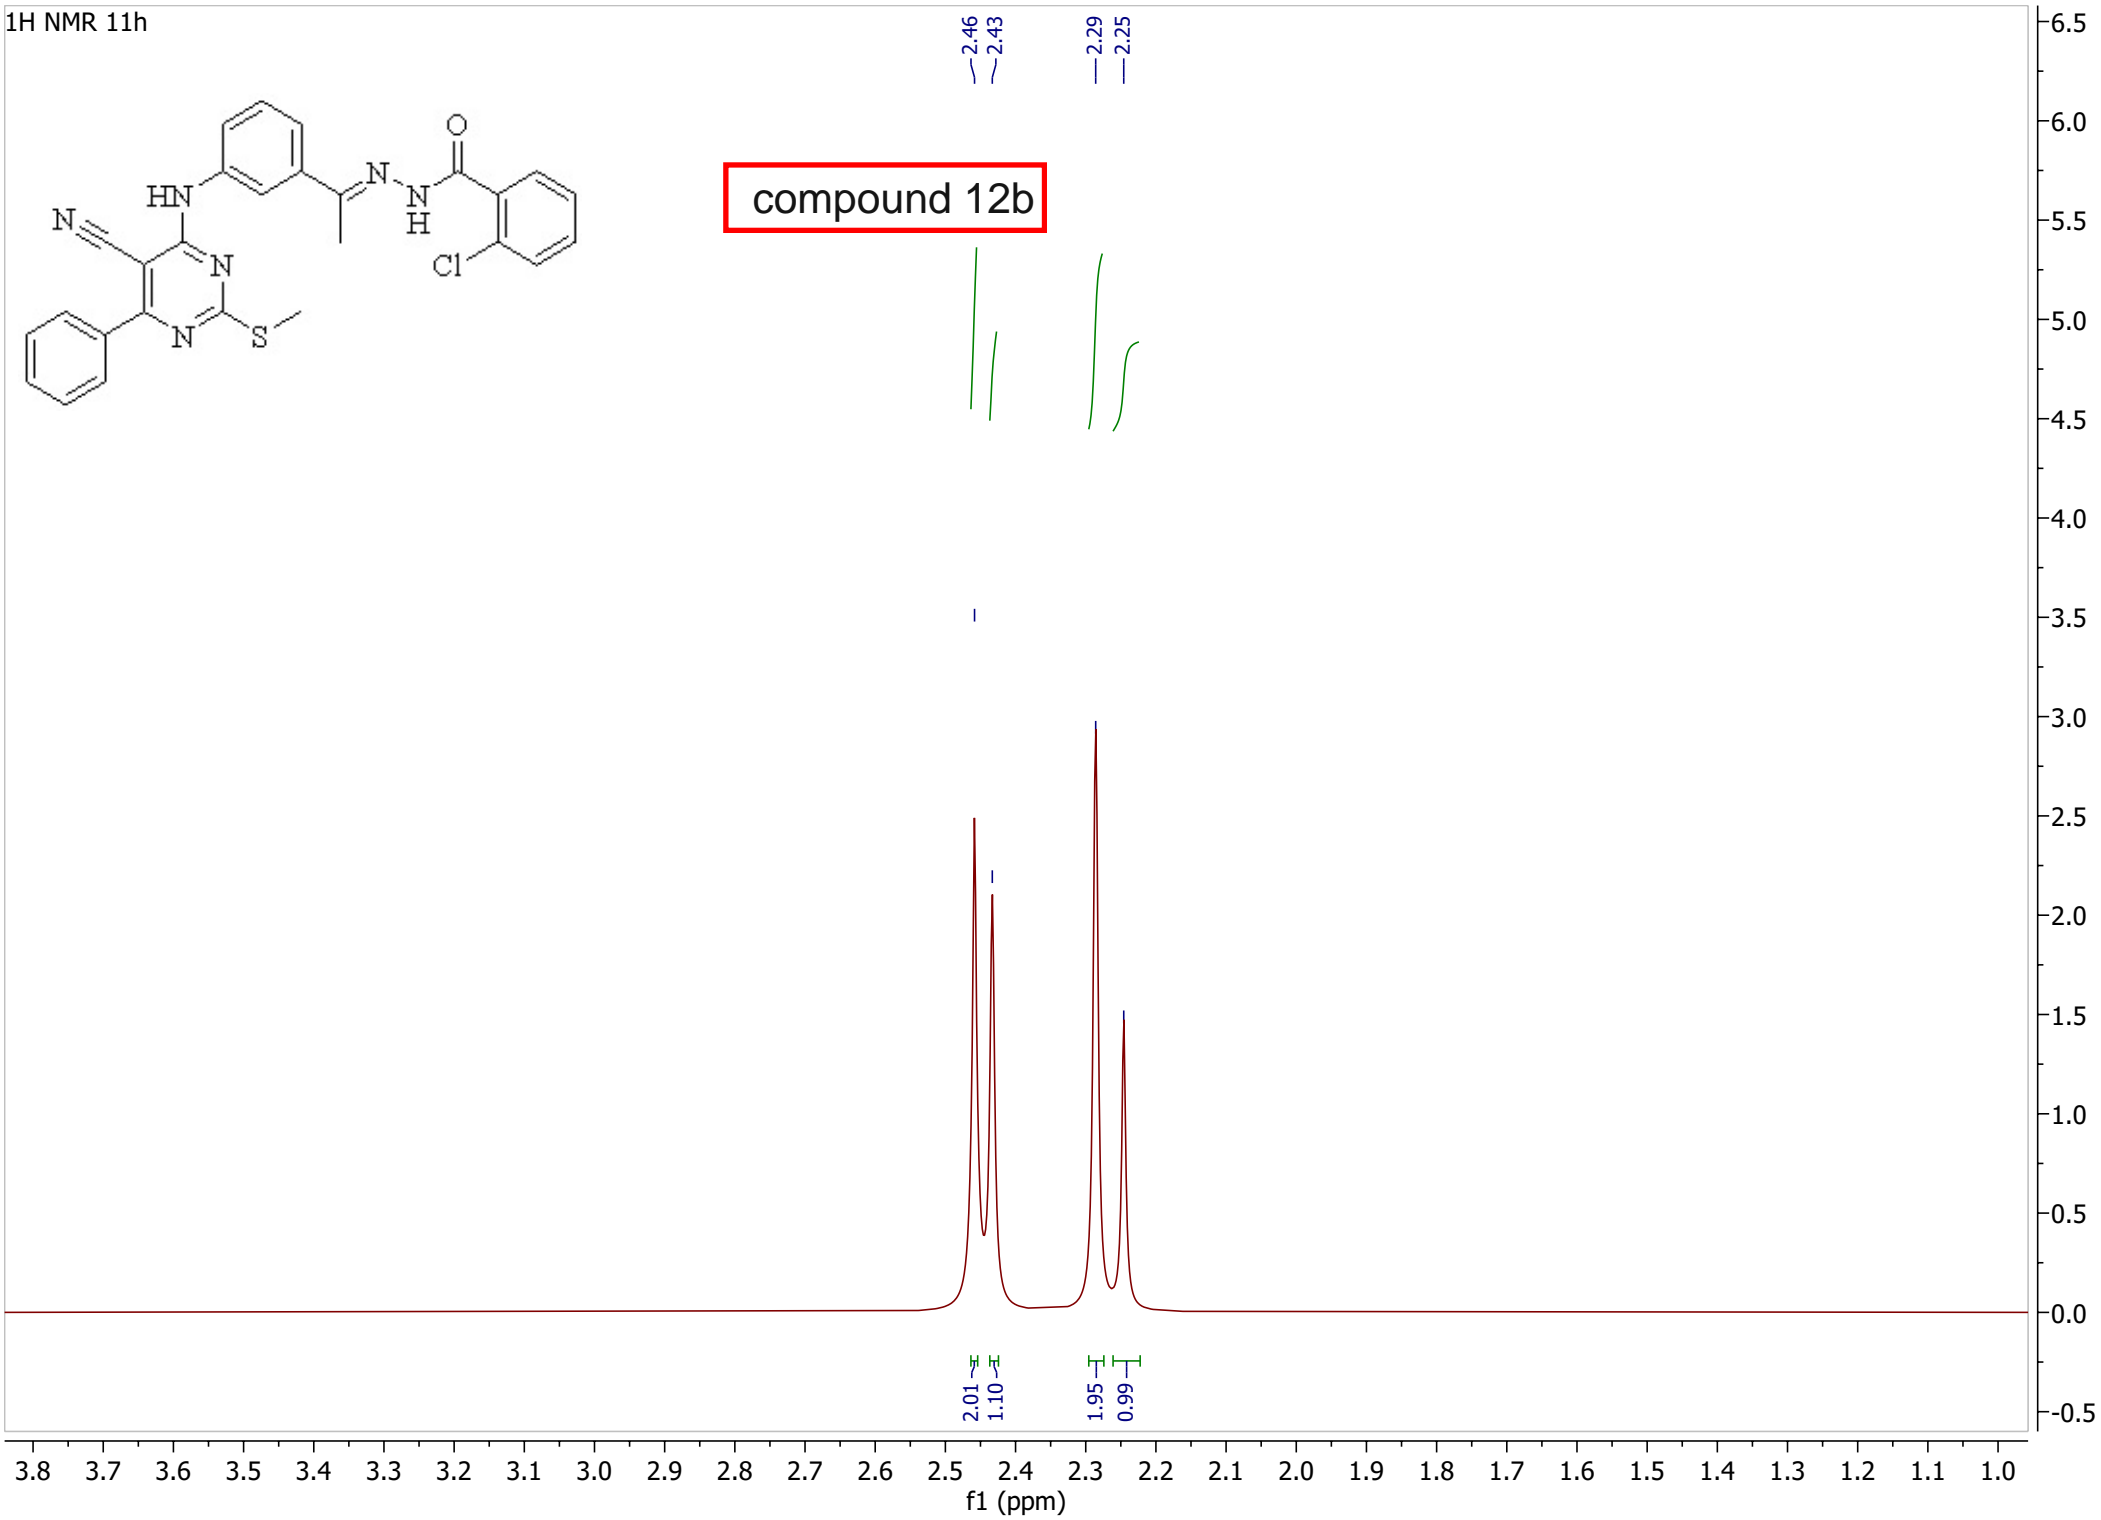

<sup>1</sup>H NMR 11h

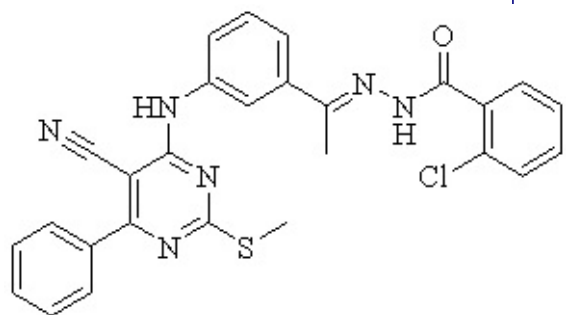

compound 12b

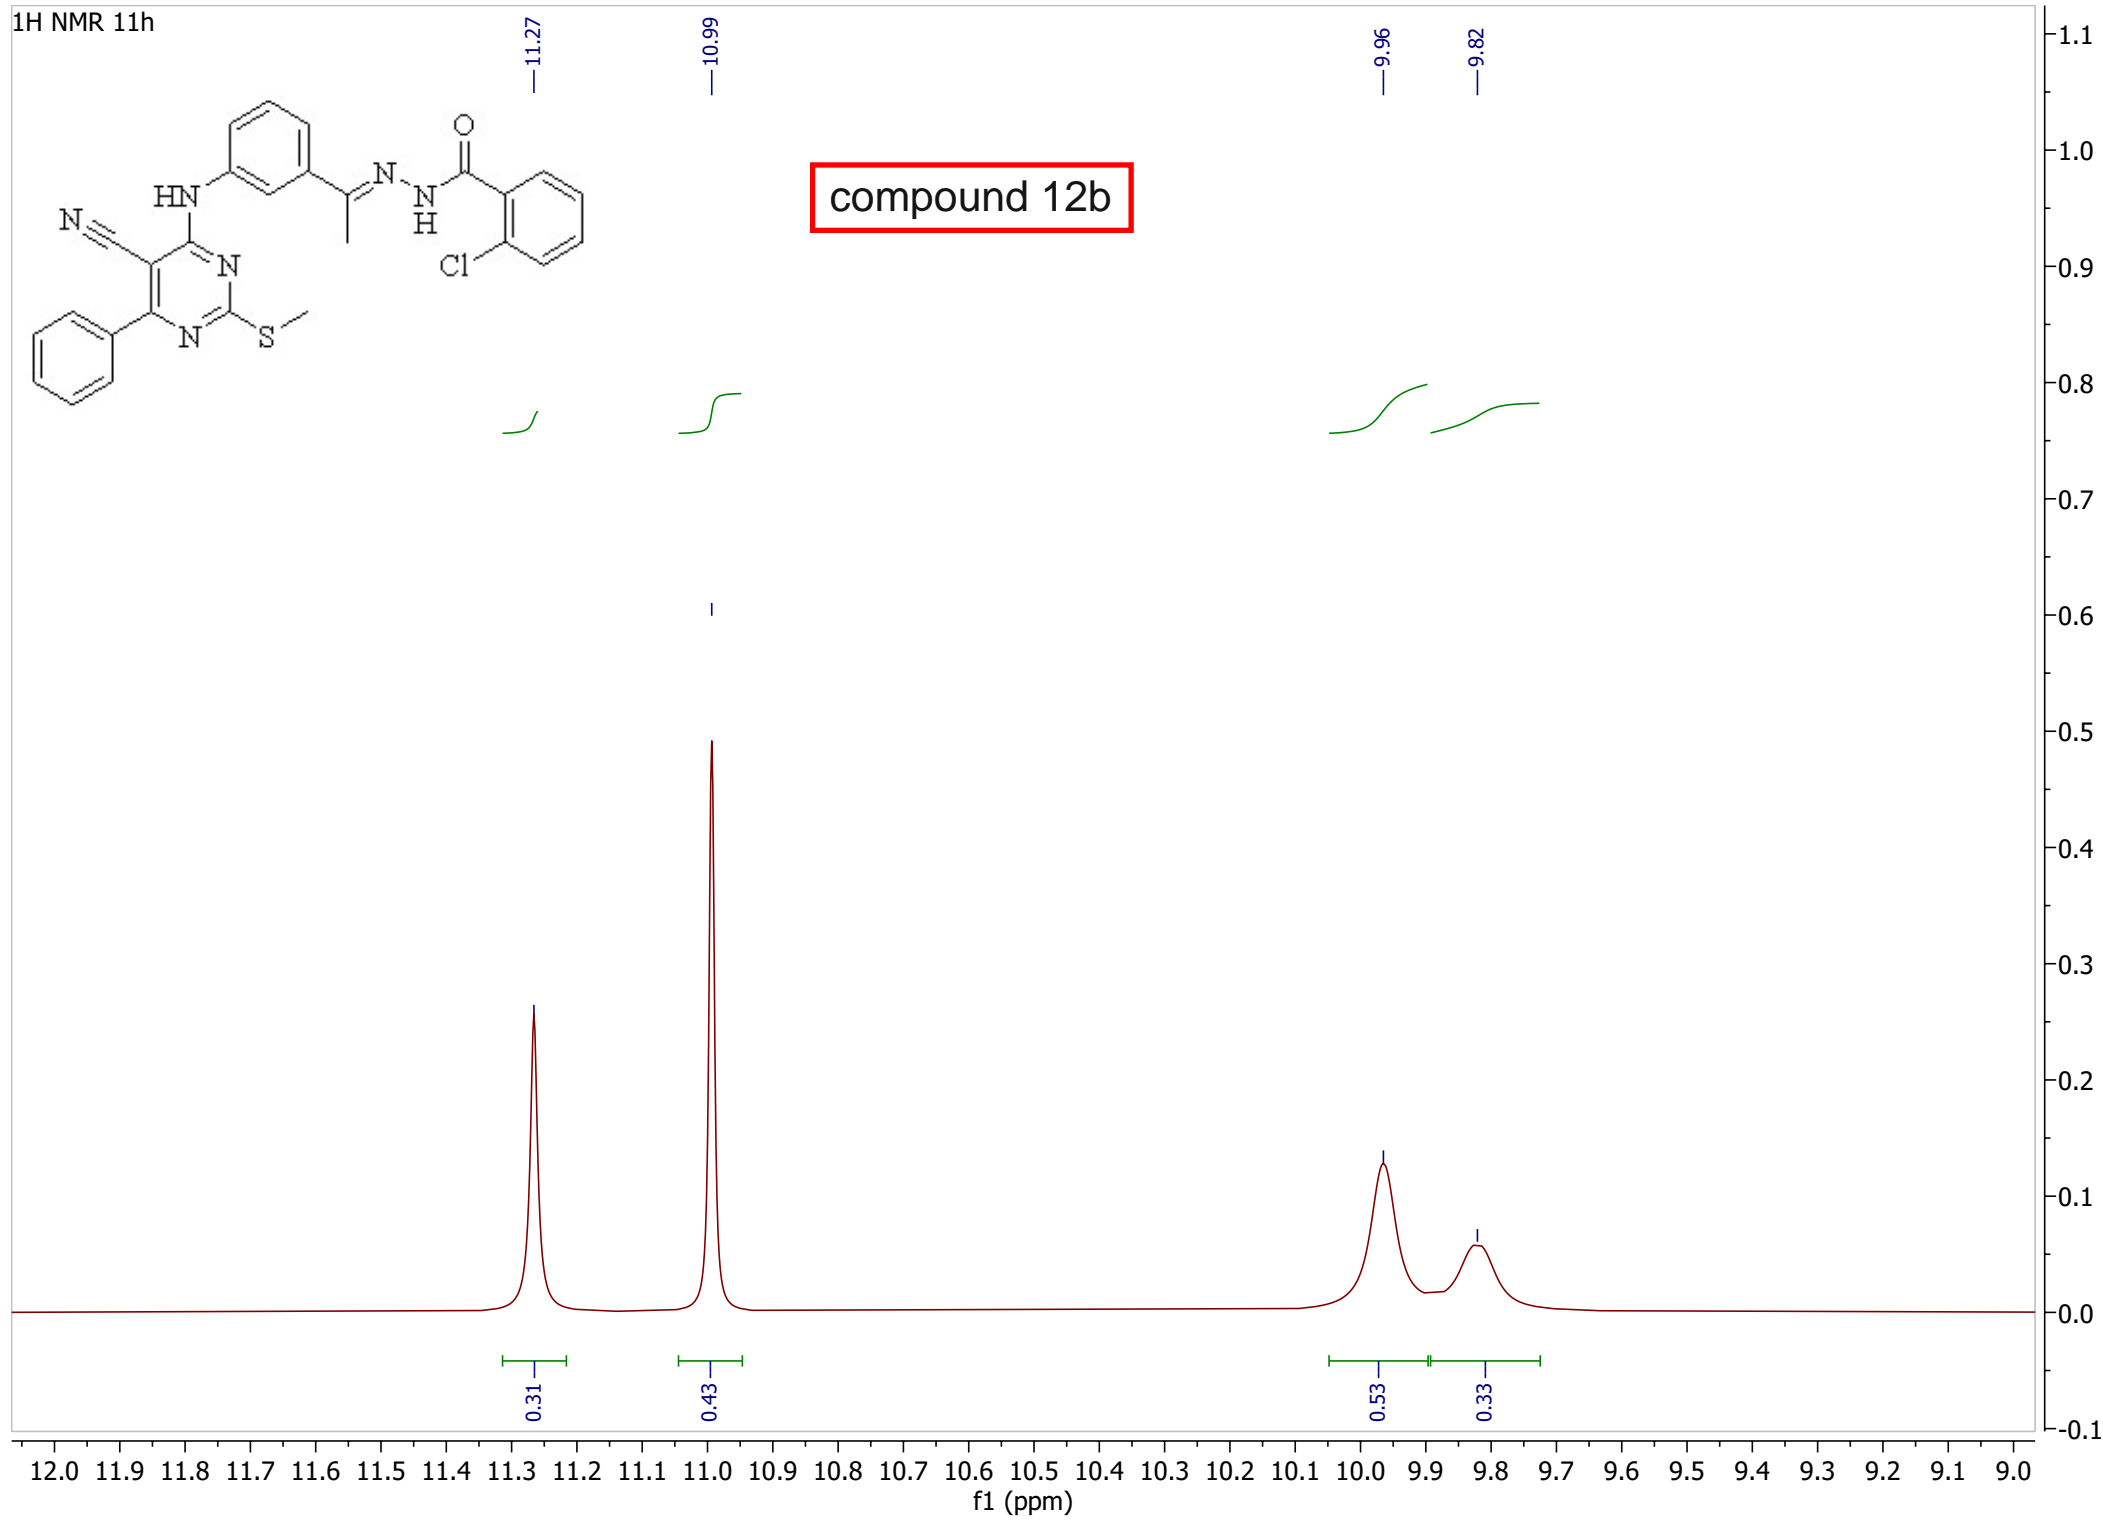

# SAMPLE INFORMATION

|                   |                           |                     |                                 |
|-------------------|---------------------------|---------------------|---------------------------------|
| Sample Name:      | ASZMB <b>Compound 12c</b> | Acquired By:        | System                          |
| Sample Type:      | Unknown                   | Sample Set Name:    | 1                               |
| Vial:             | 20                        | Acq. Method Set:    | Organic1                        |
| Injection #:      | 1                         | Processing Method:  | Default                         |
| Injection Volume: | 2.00 ul                   | Channel Name:       | 275.0nm                         |
| Run Time:         | 14.5 Minutes              | Proc. Chnl. Descr.: | W2996 FDA 275.0 nm(FDA 190.0 to |

Date Acquired: 11/5/2022 9:59:08 FMEET  
 Date Processed: 11/6/2022 5:29:15 AMEET

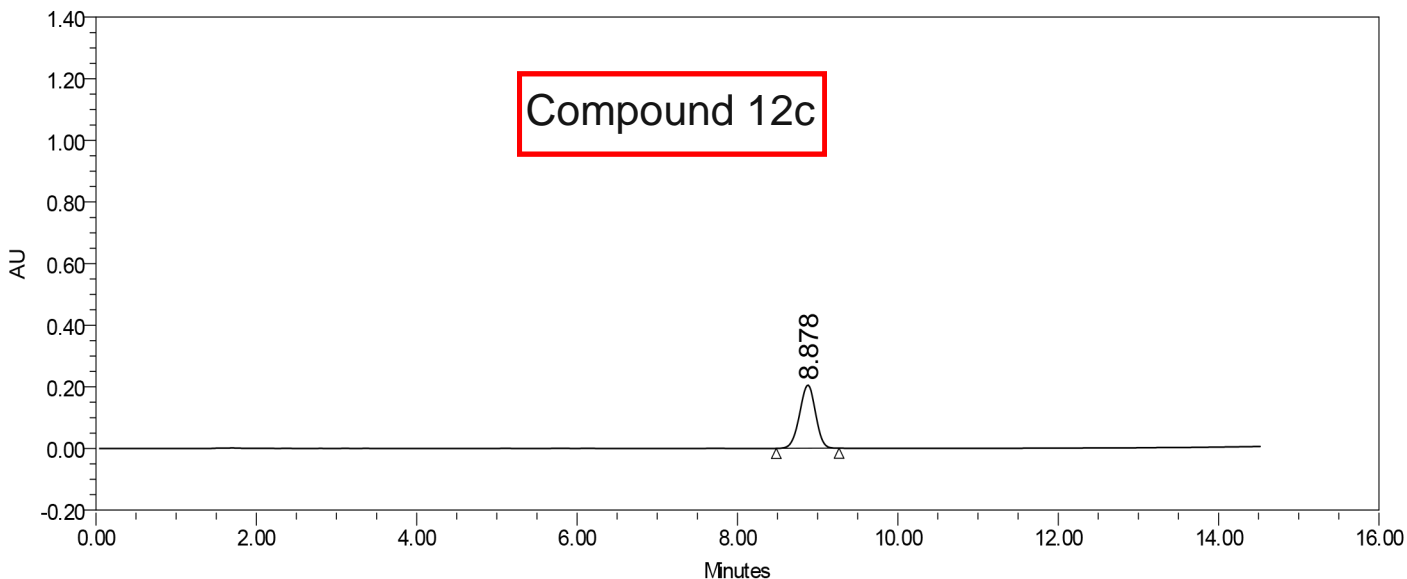

|   | RT    | Area    | % Area | Height |
|---|-------|---------|--------|--------|
| 1 | 8.878 | 2840951 | 100.00 | 204997 |

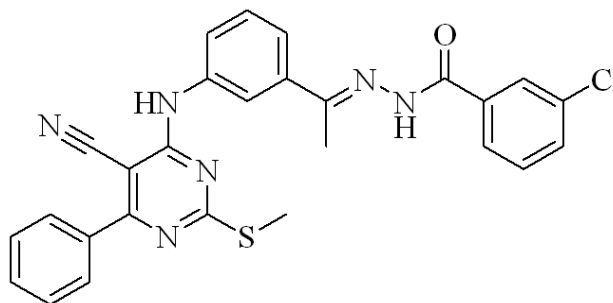

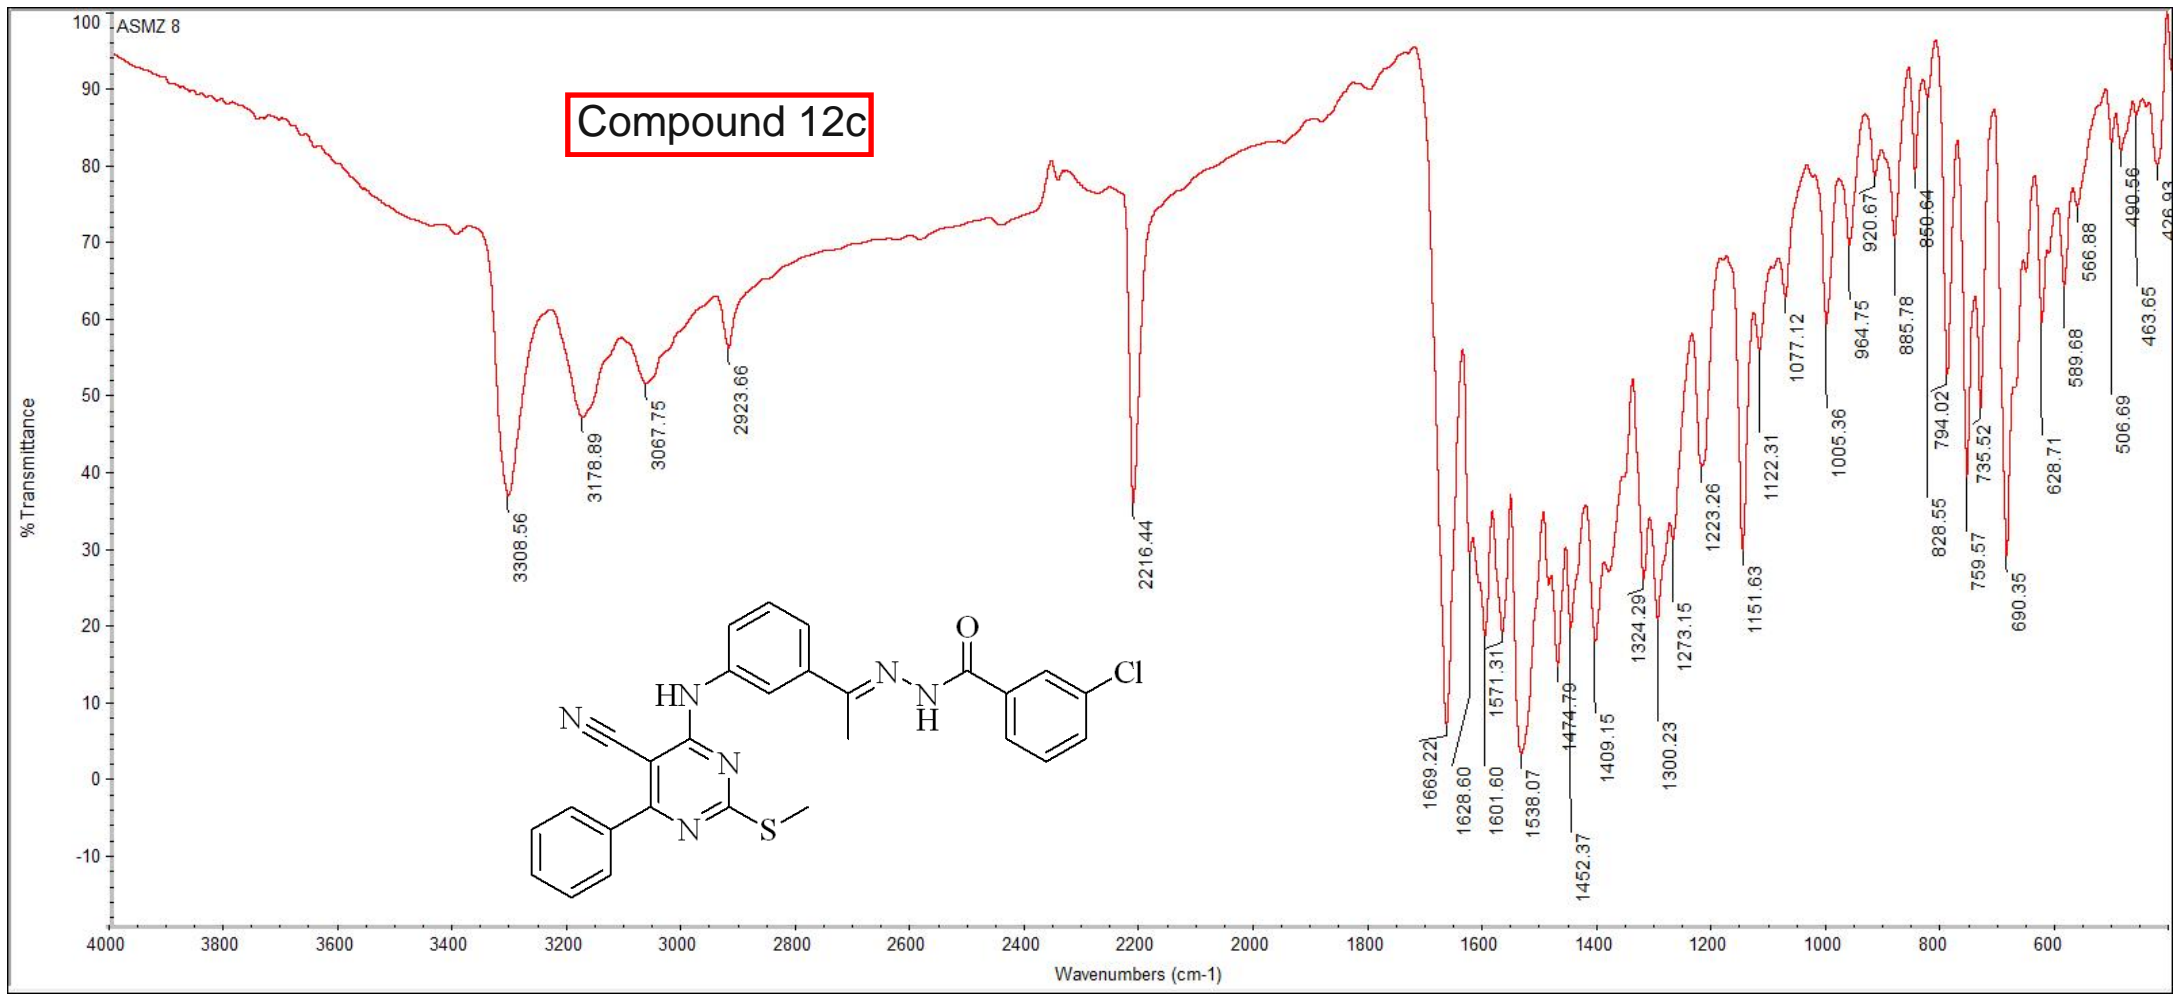



<sup>1</sup>H NMR 11h

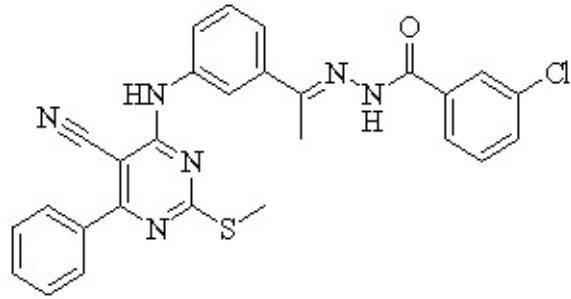

Compound 12c

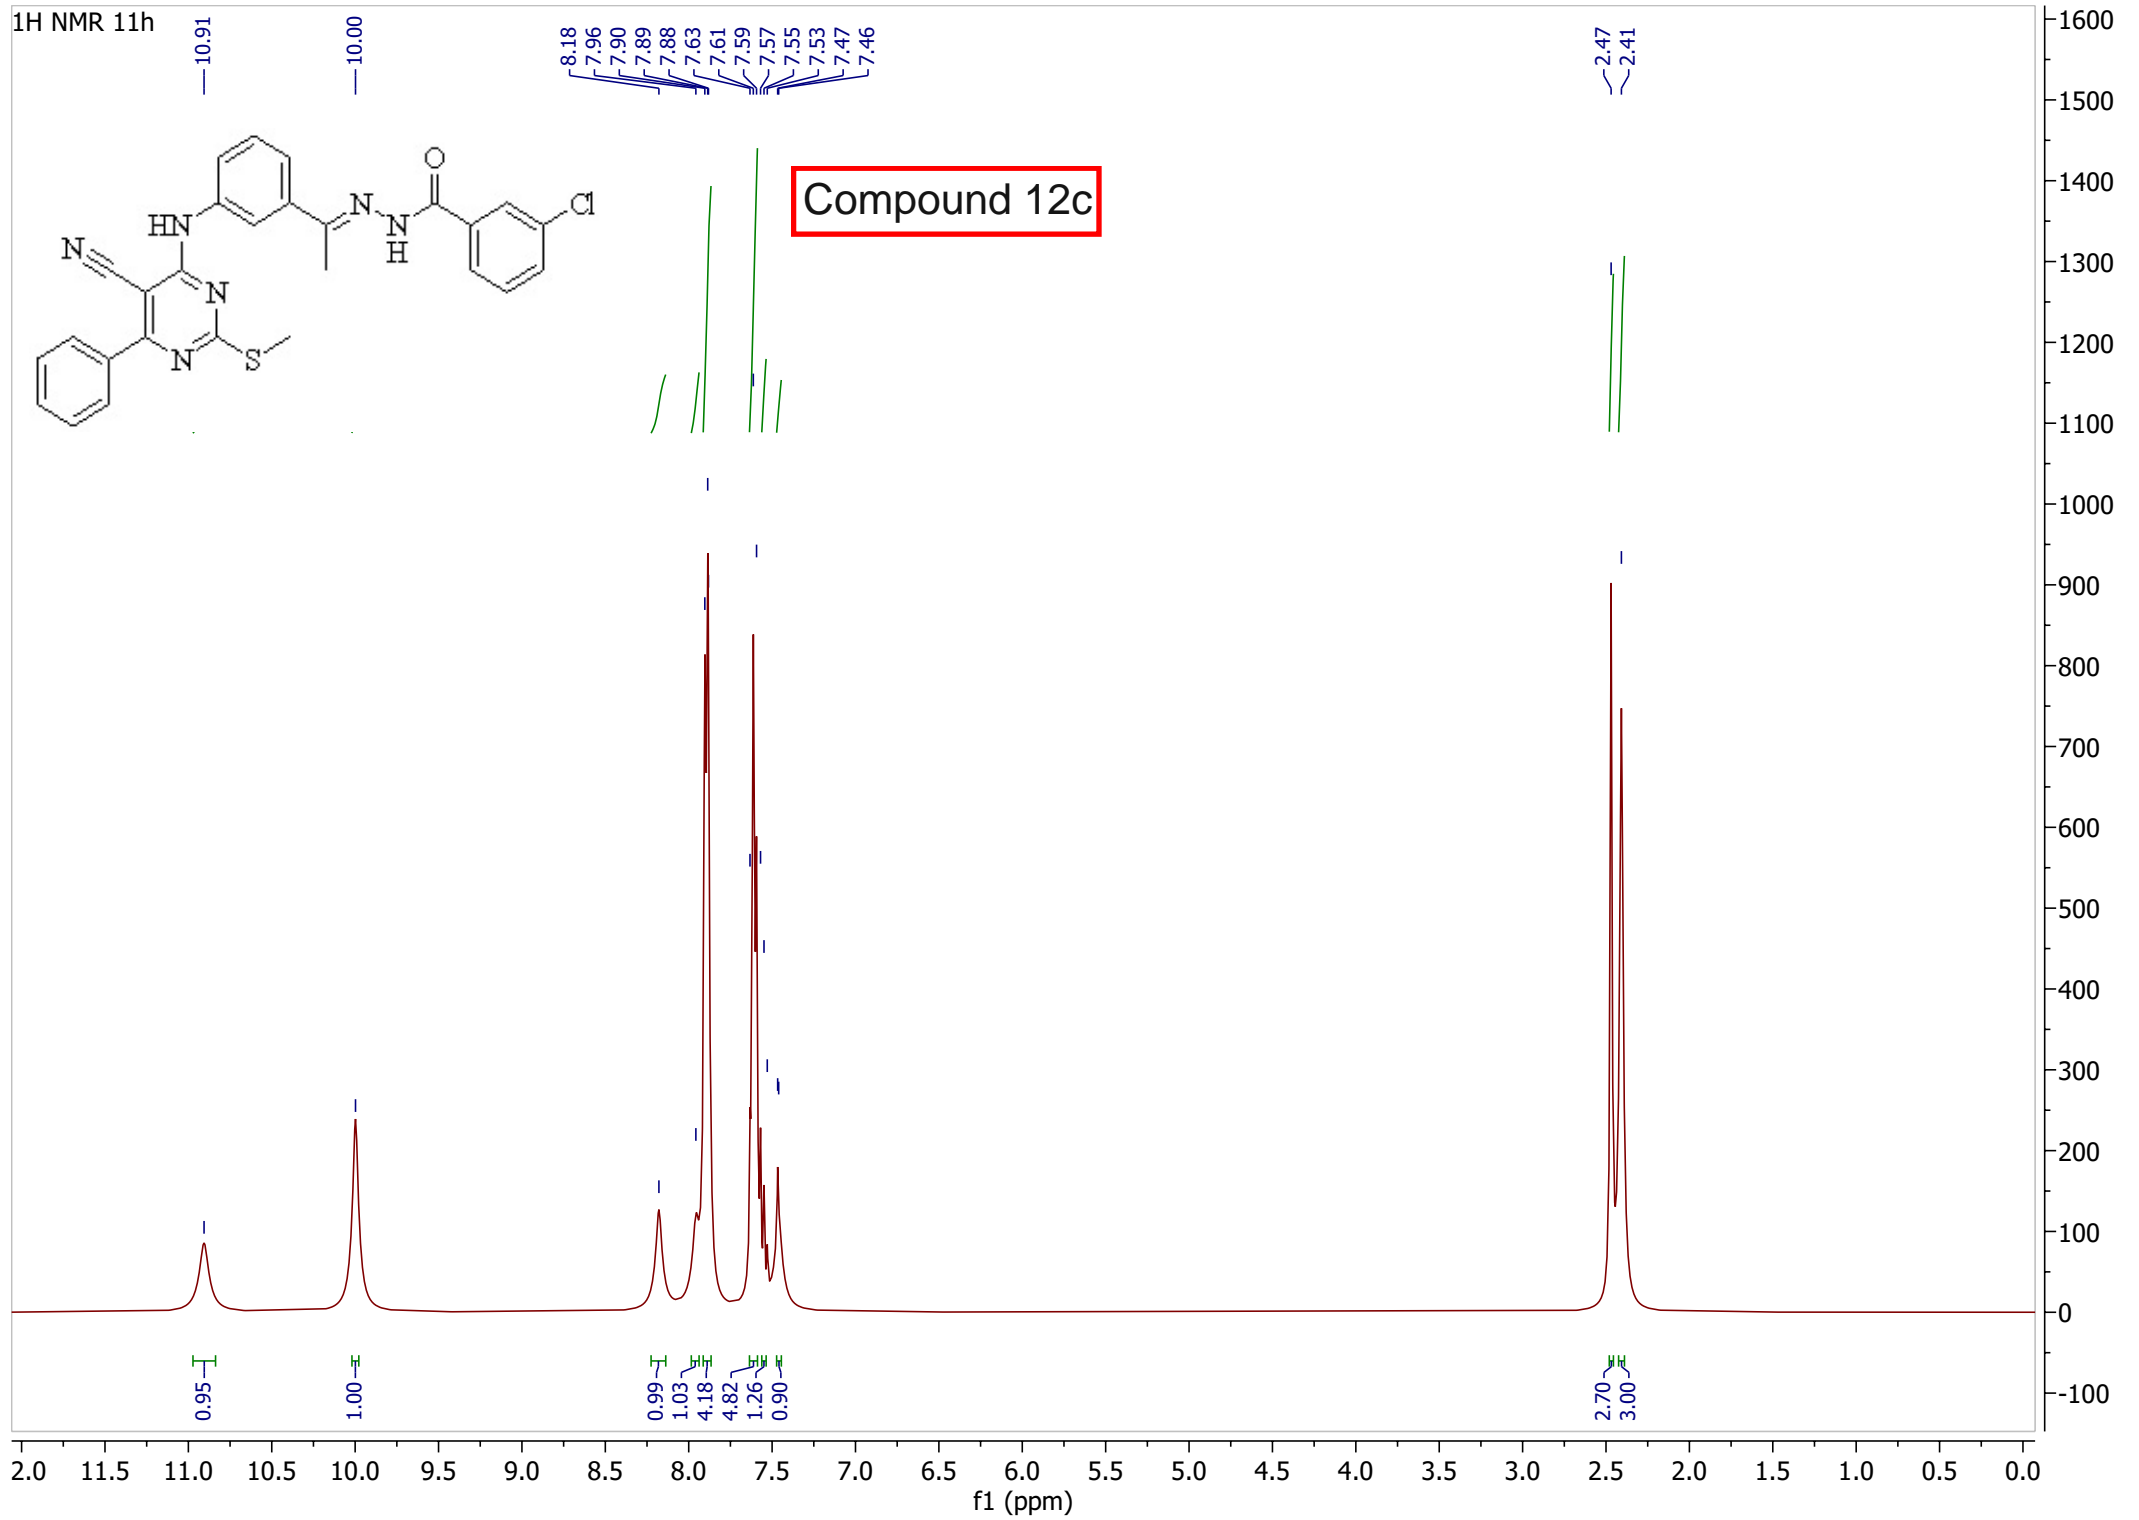

<sup>1</sup>H NMR 11h

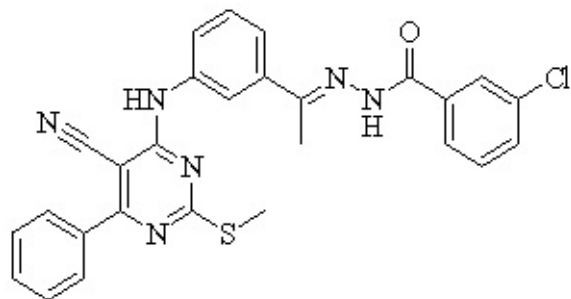

Compound 12c

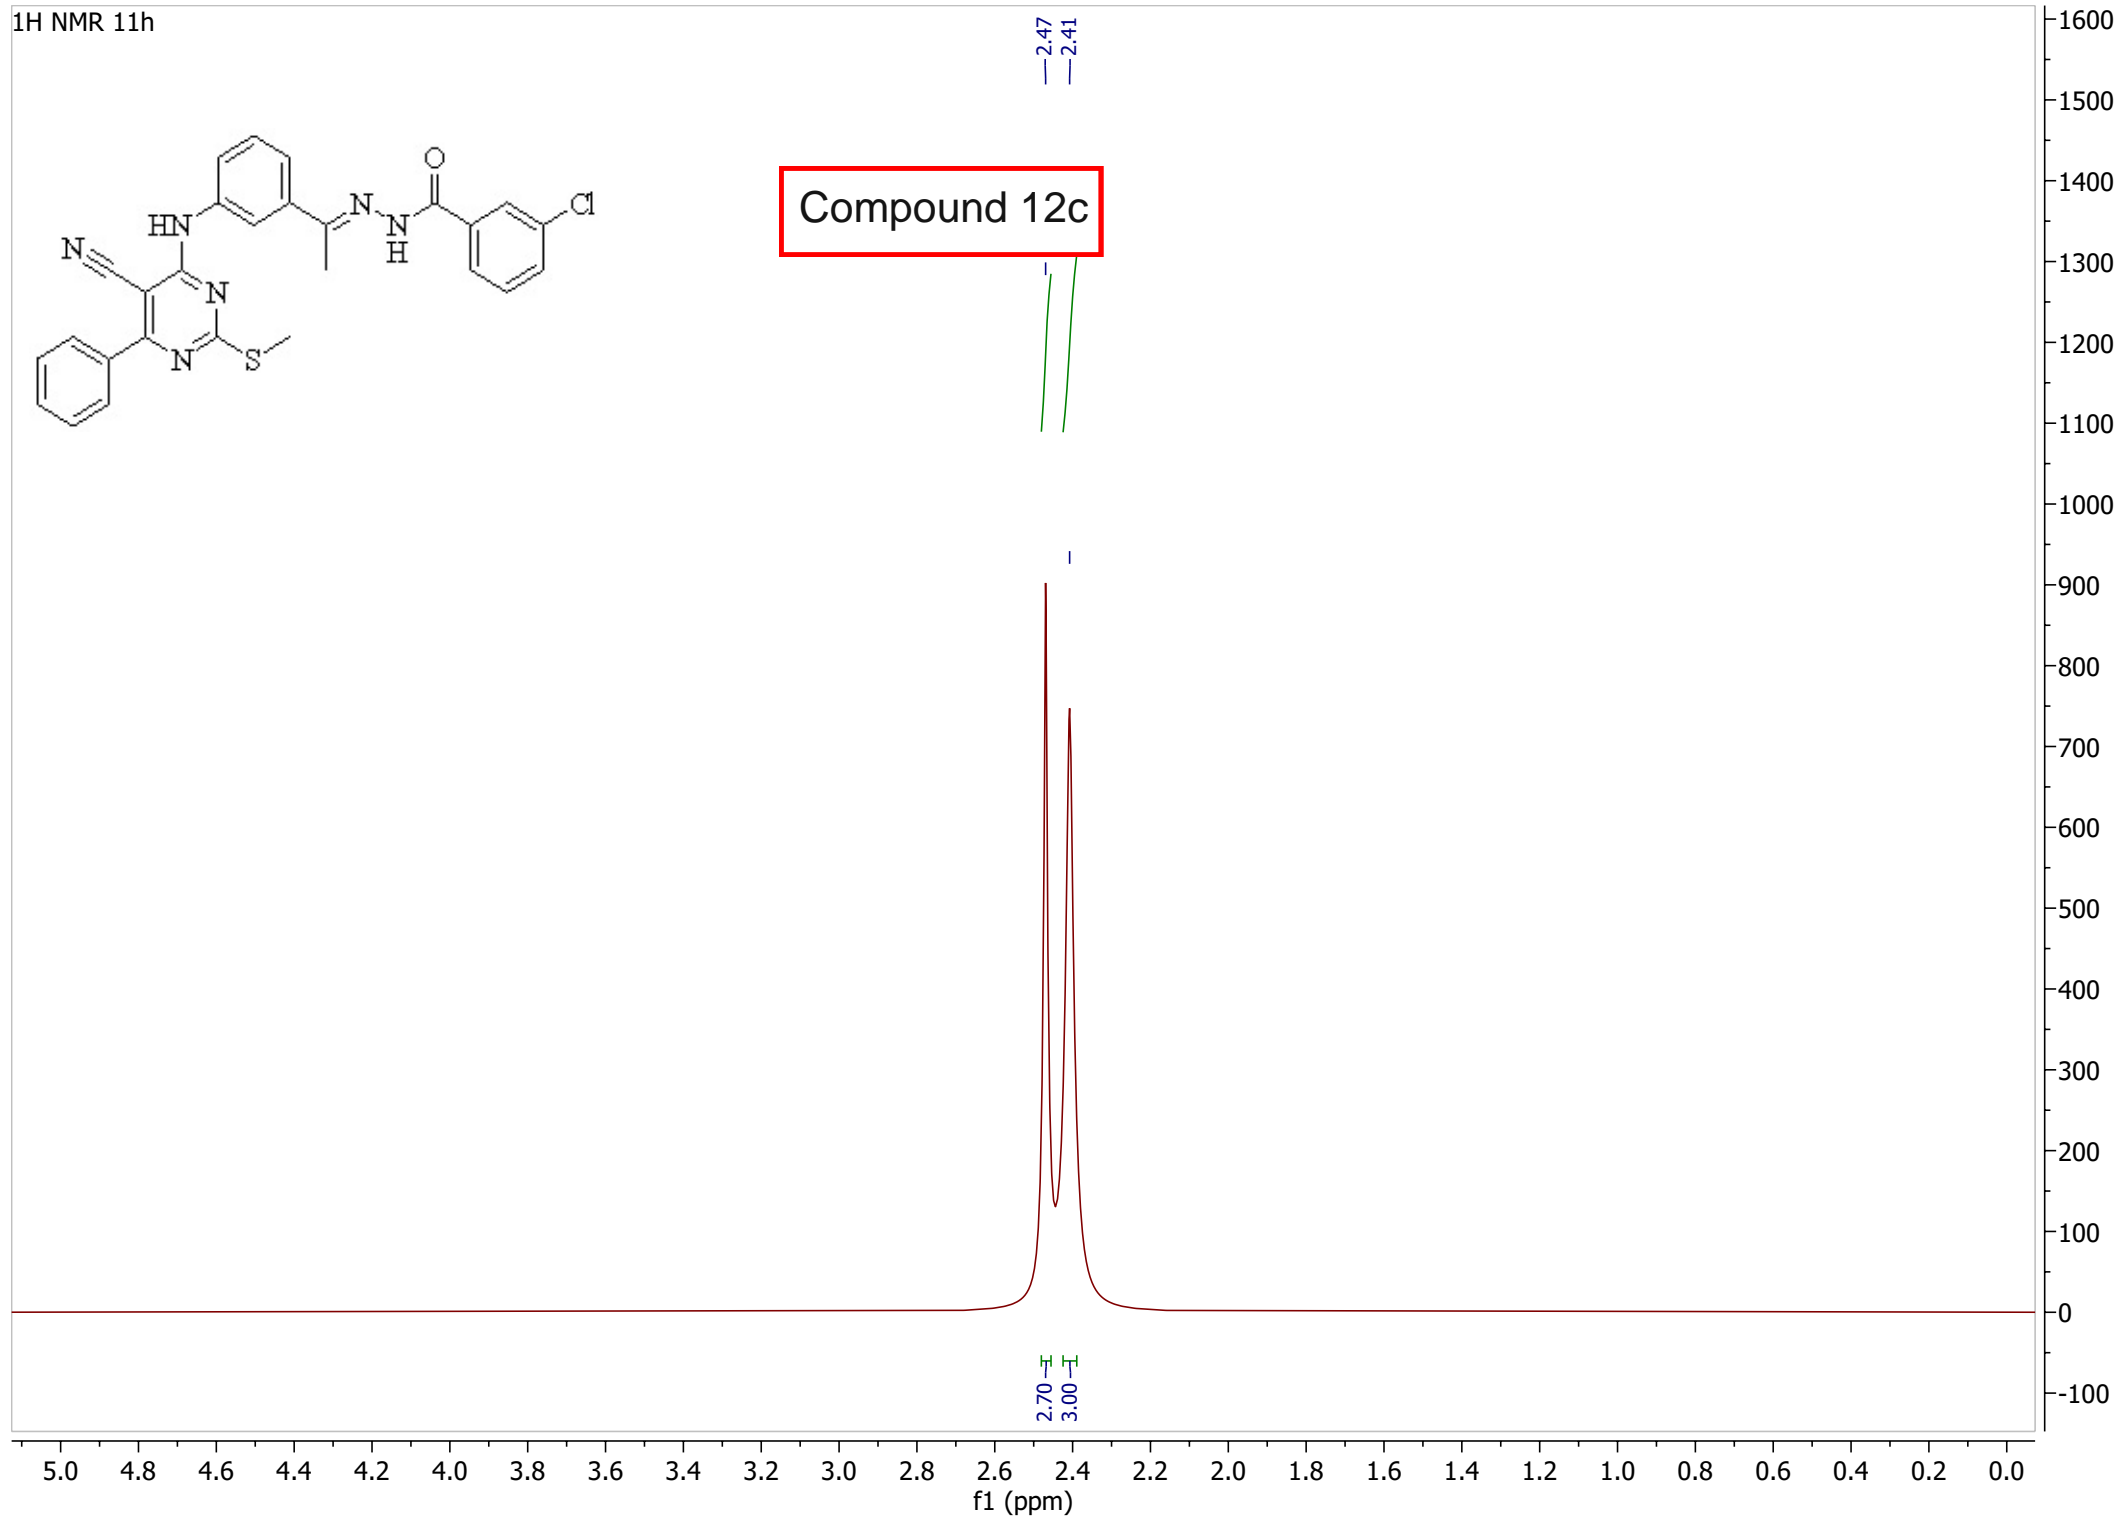

<sup>1</sup>H NMR 11h

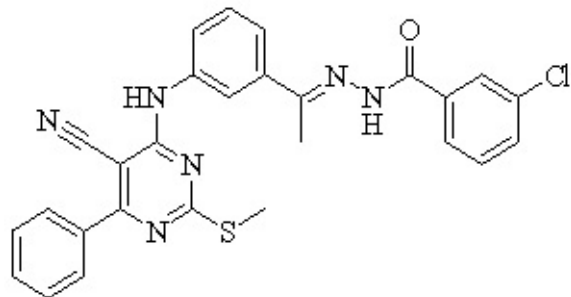

Compound 12c

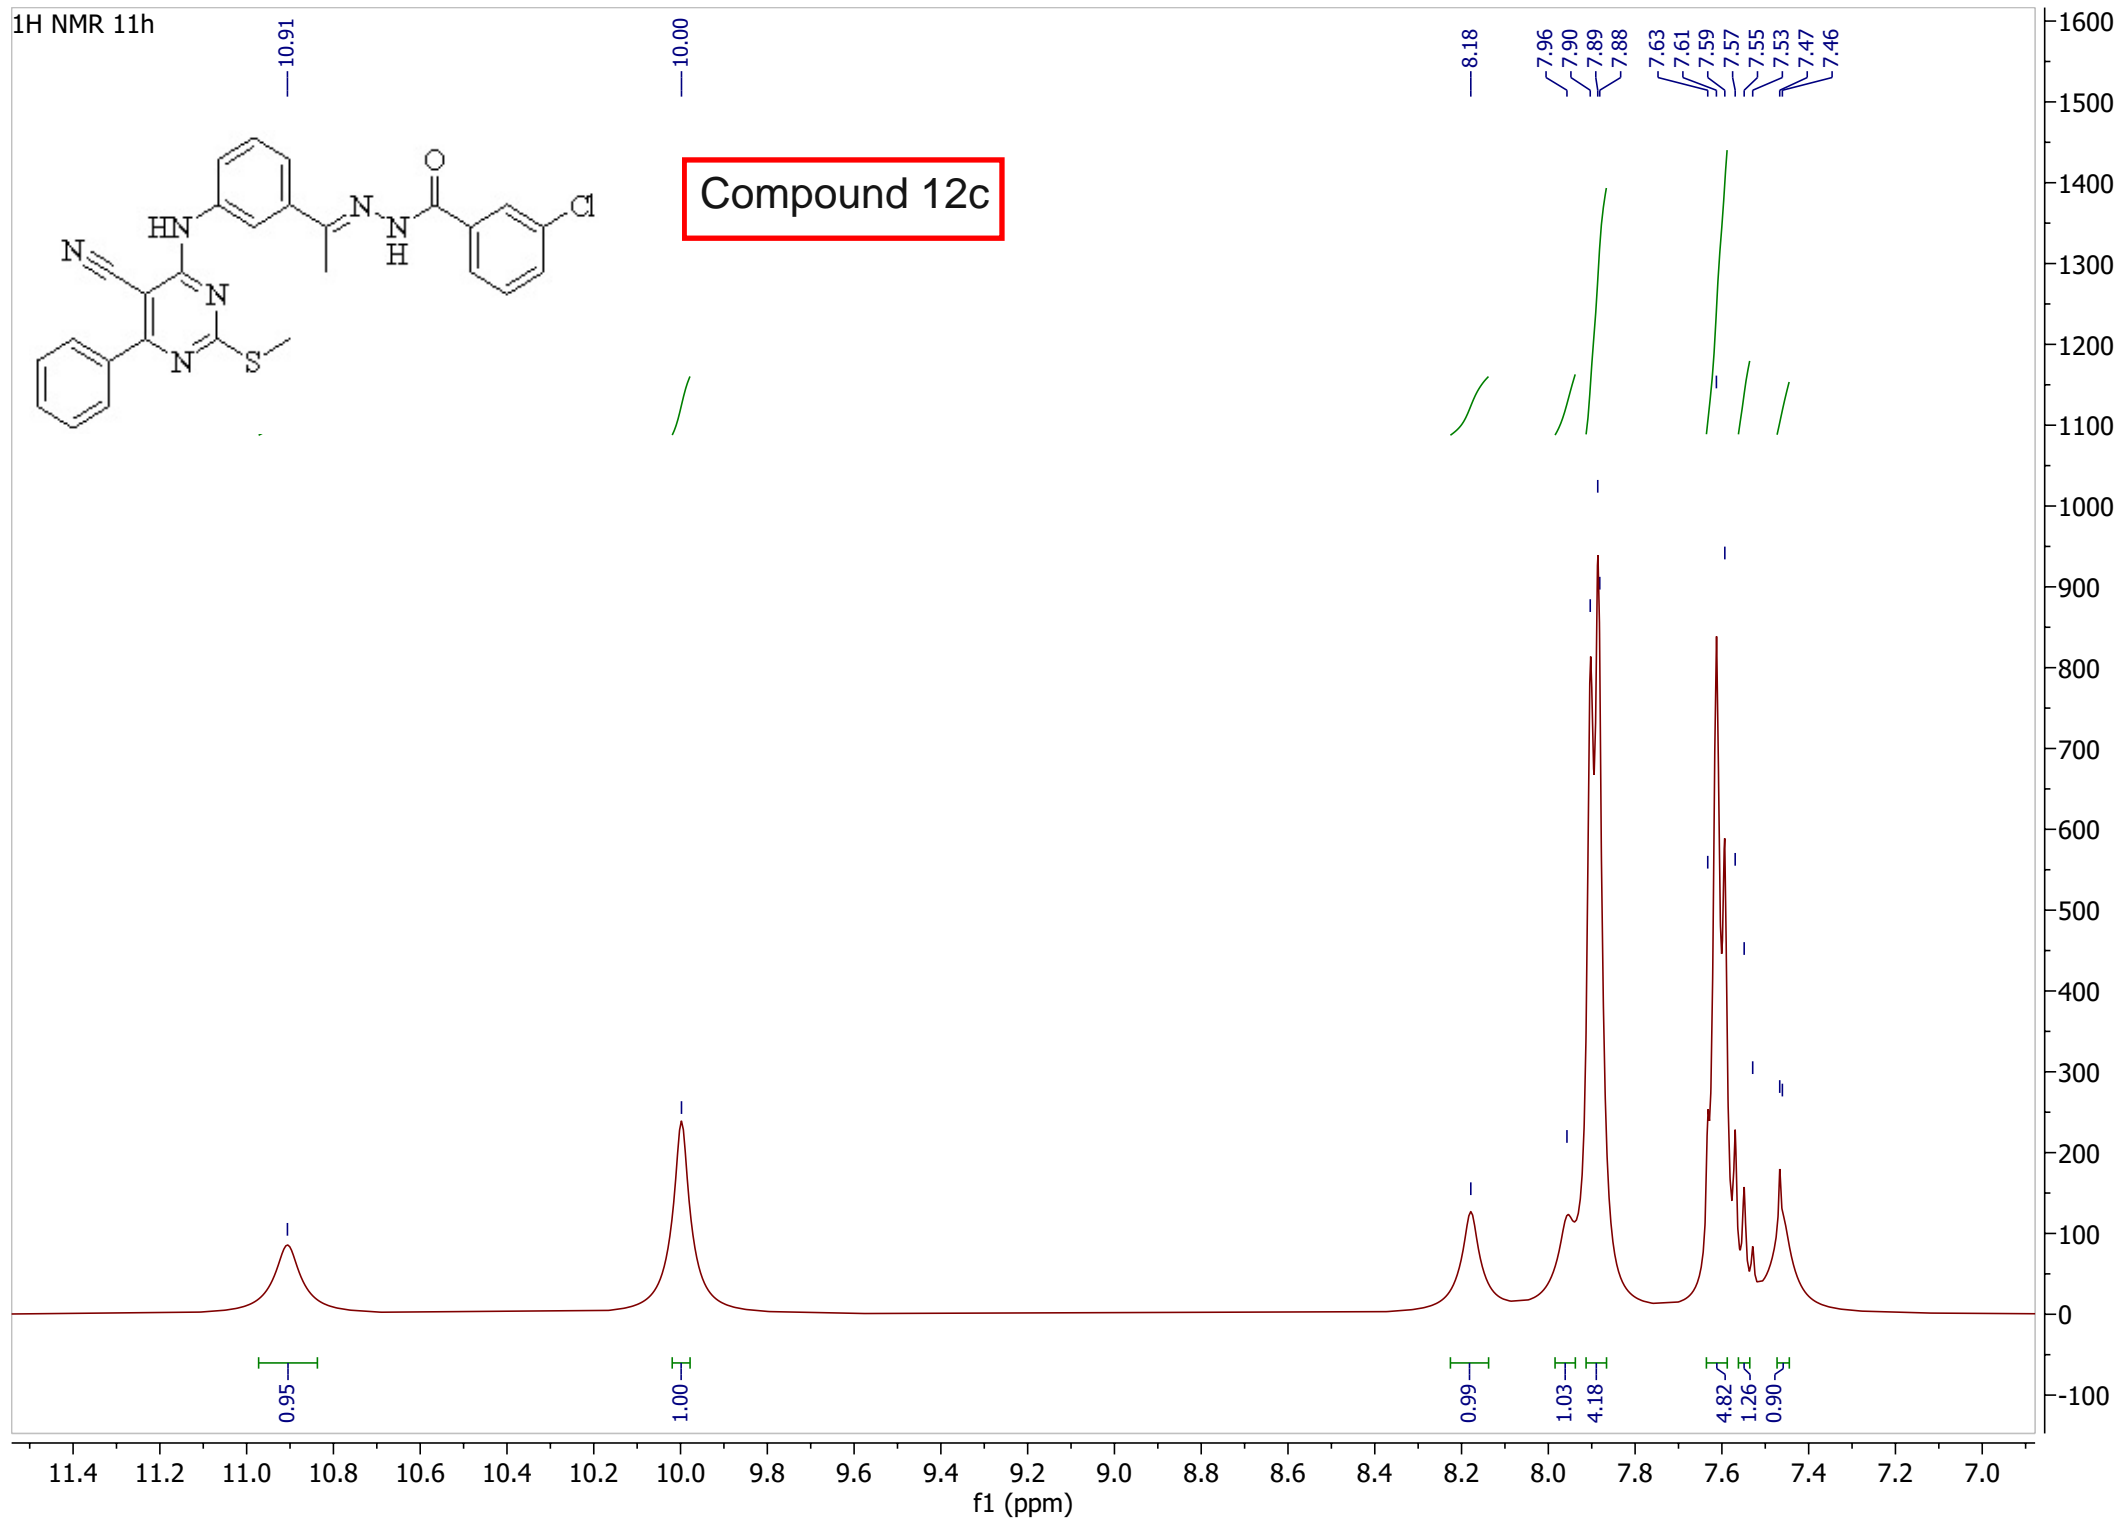

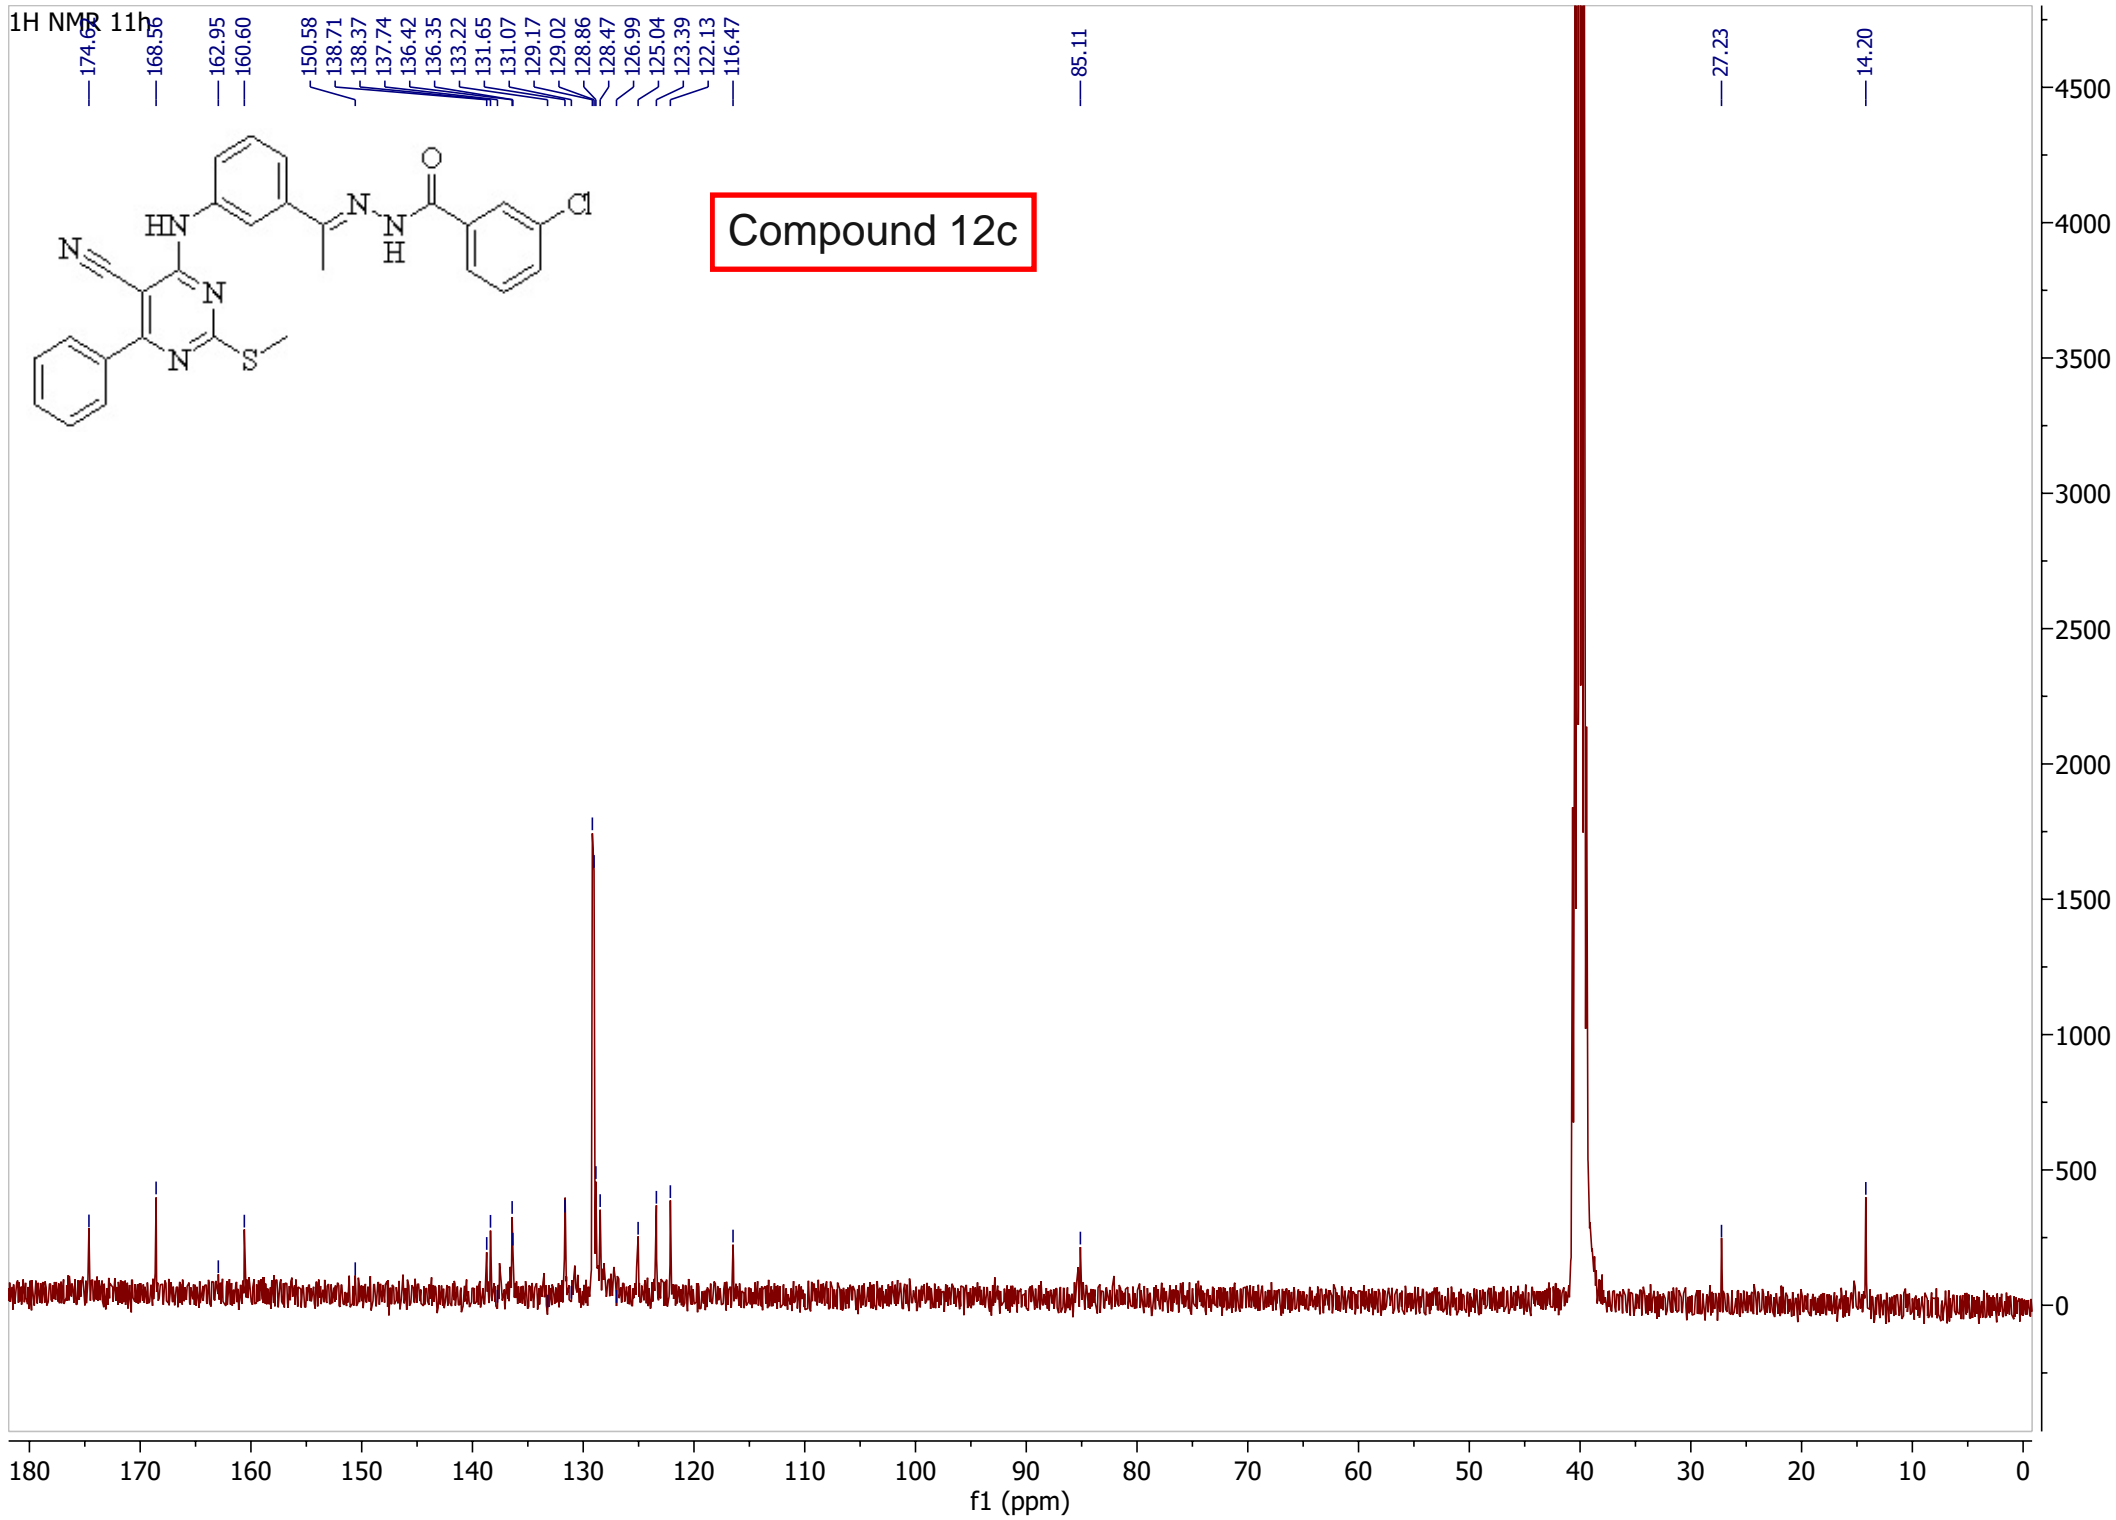

<sup>1</sup>H NMR 1h



Compound 12c

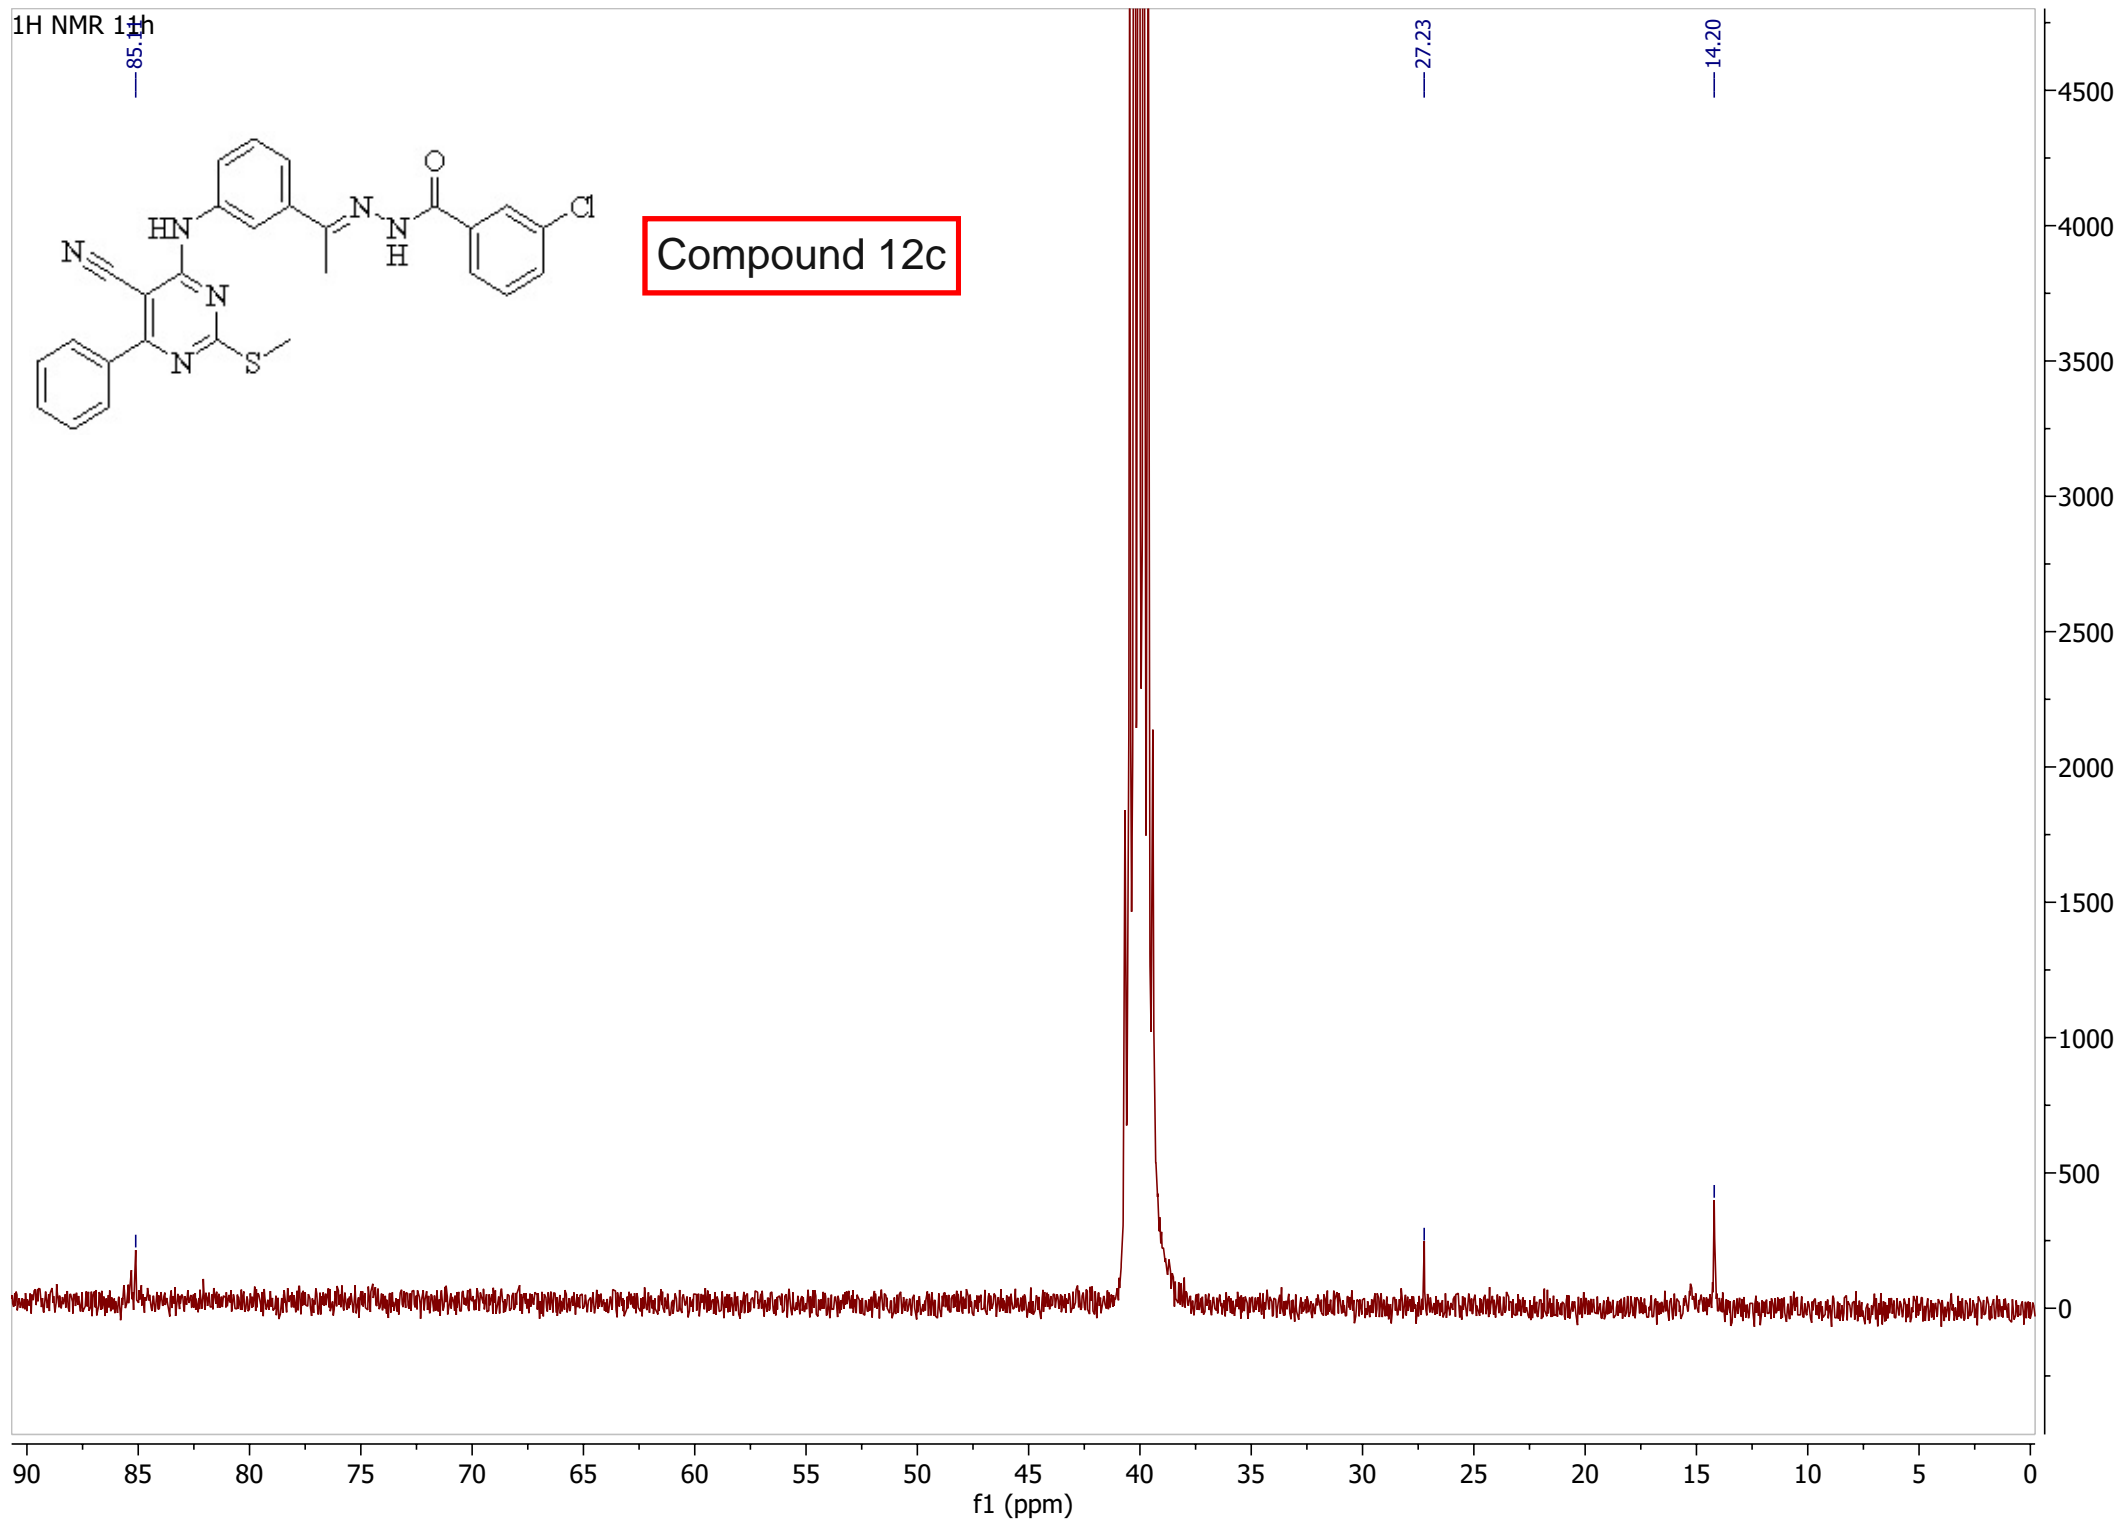

<sup>1</sup>H NMR 11h



Compound 12c

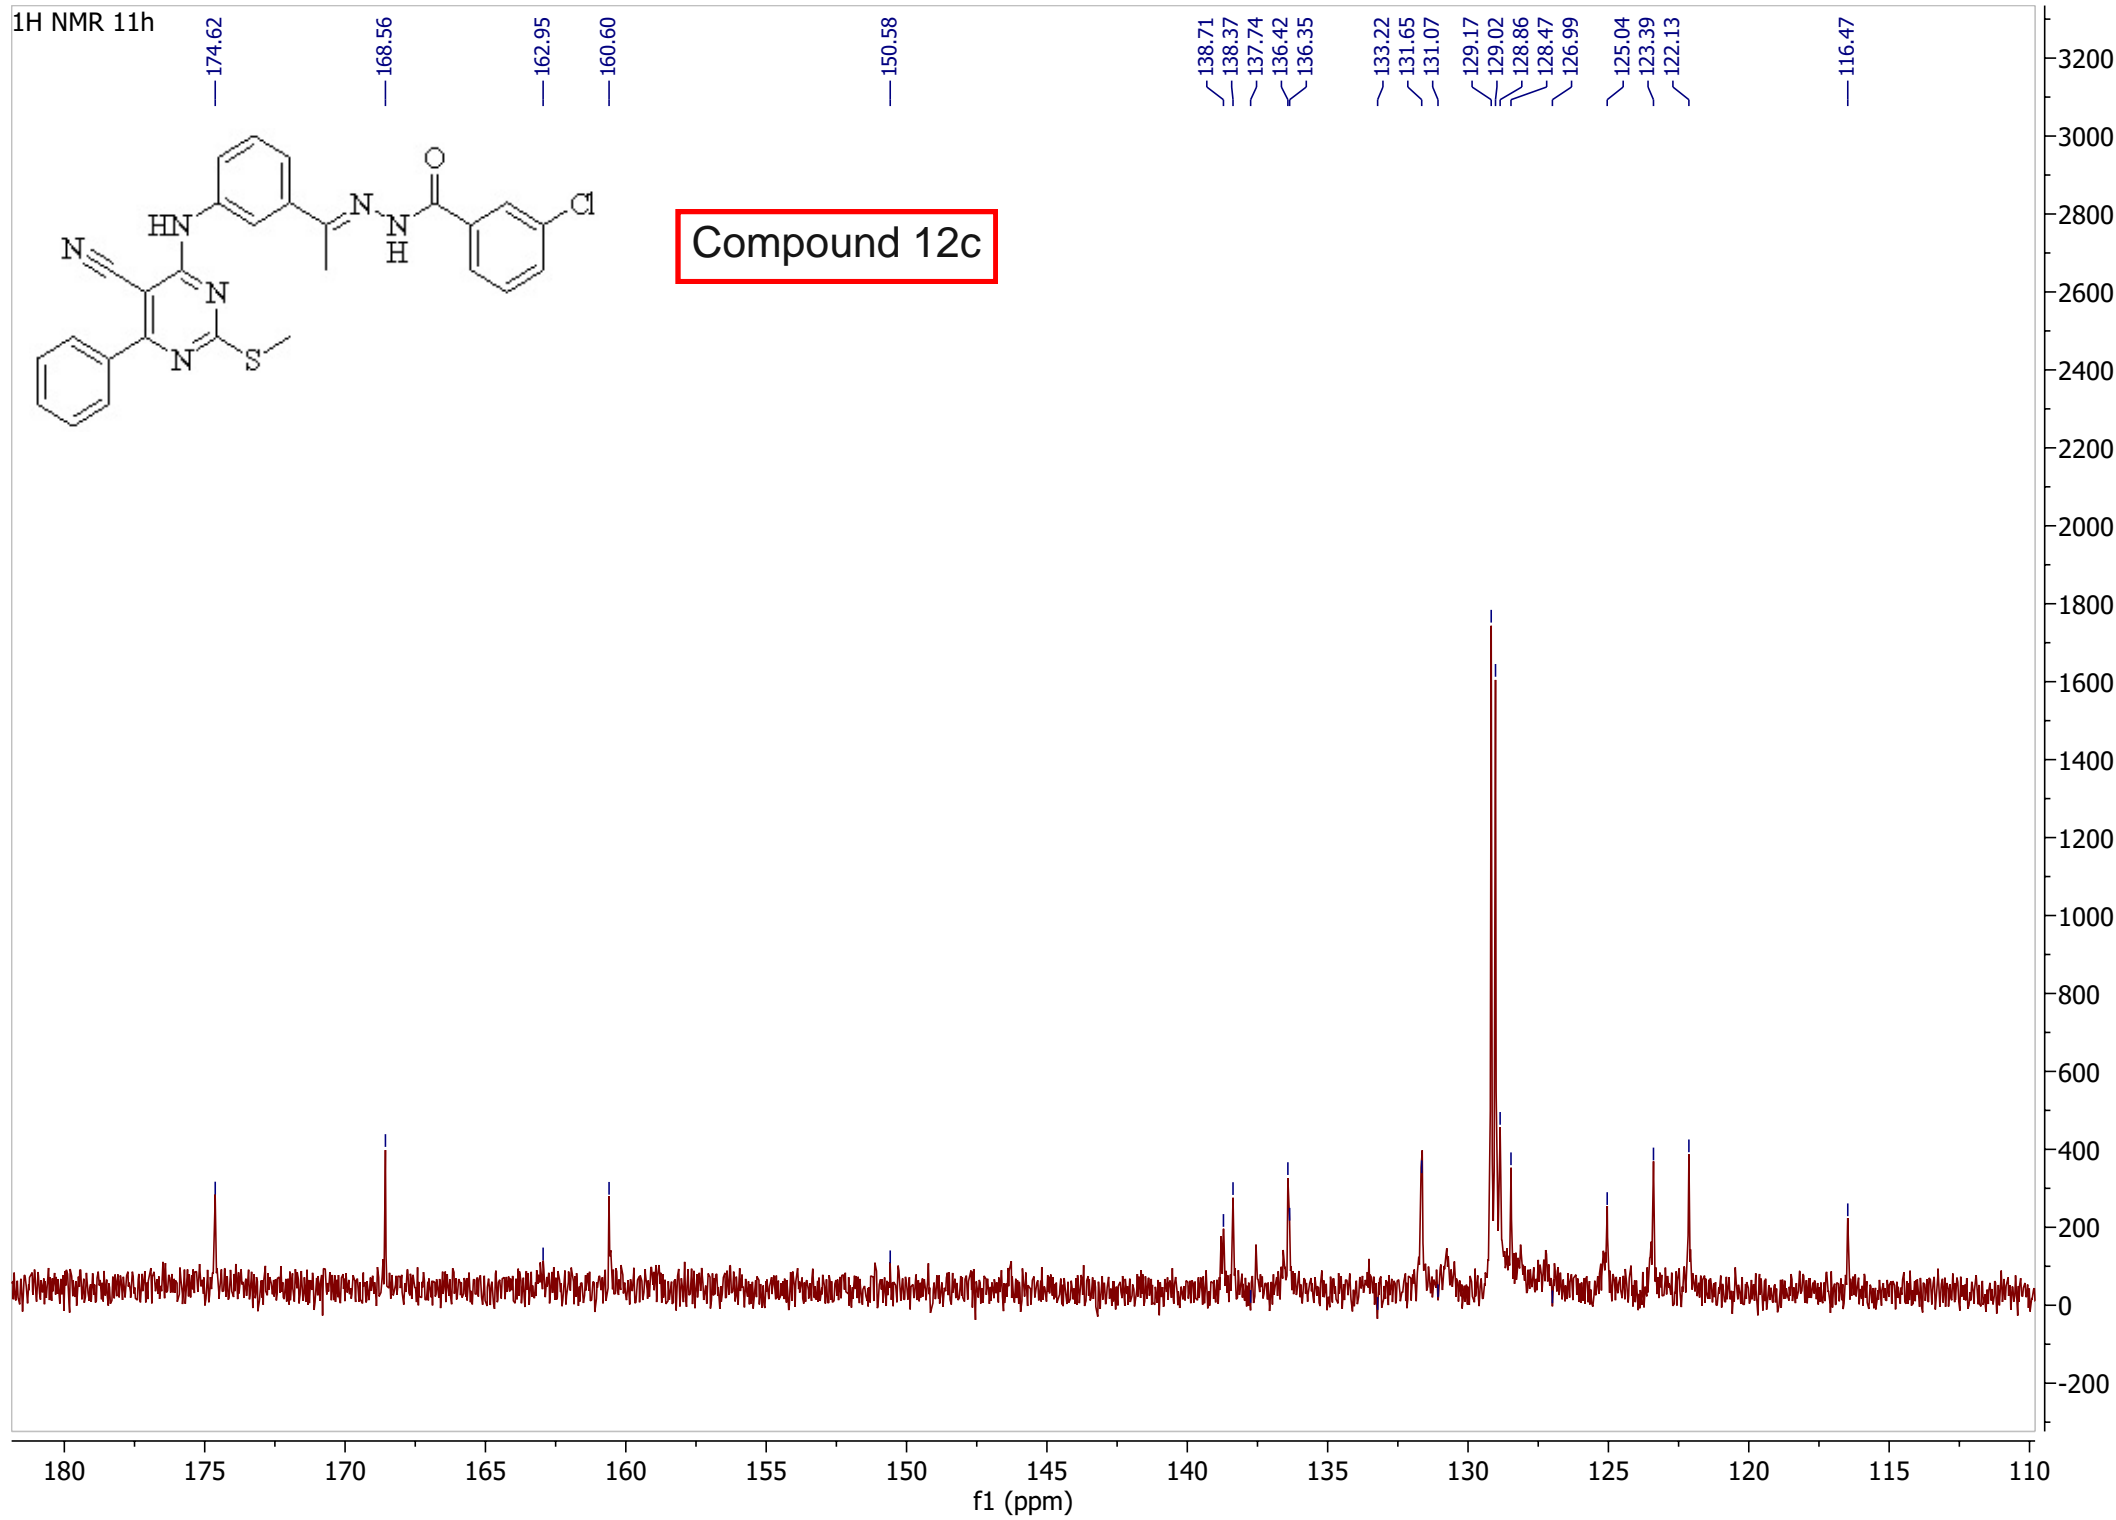

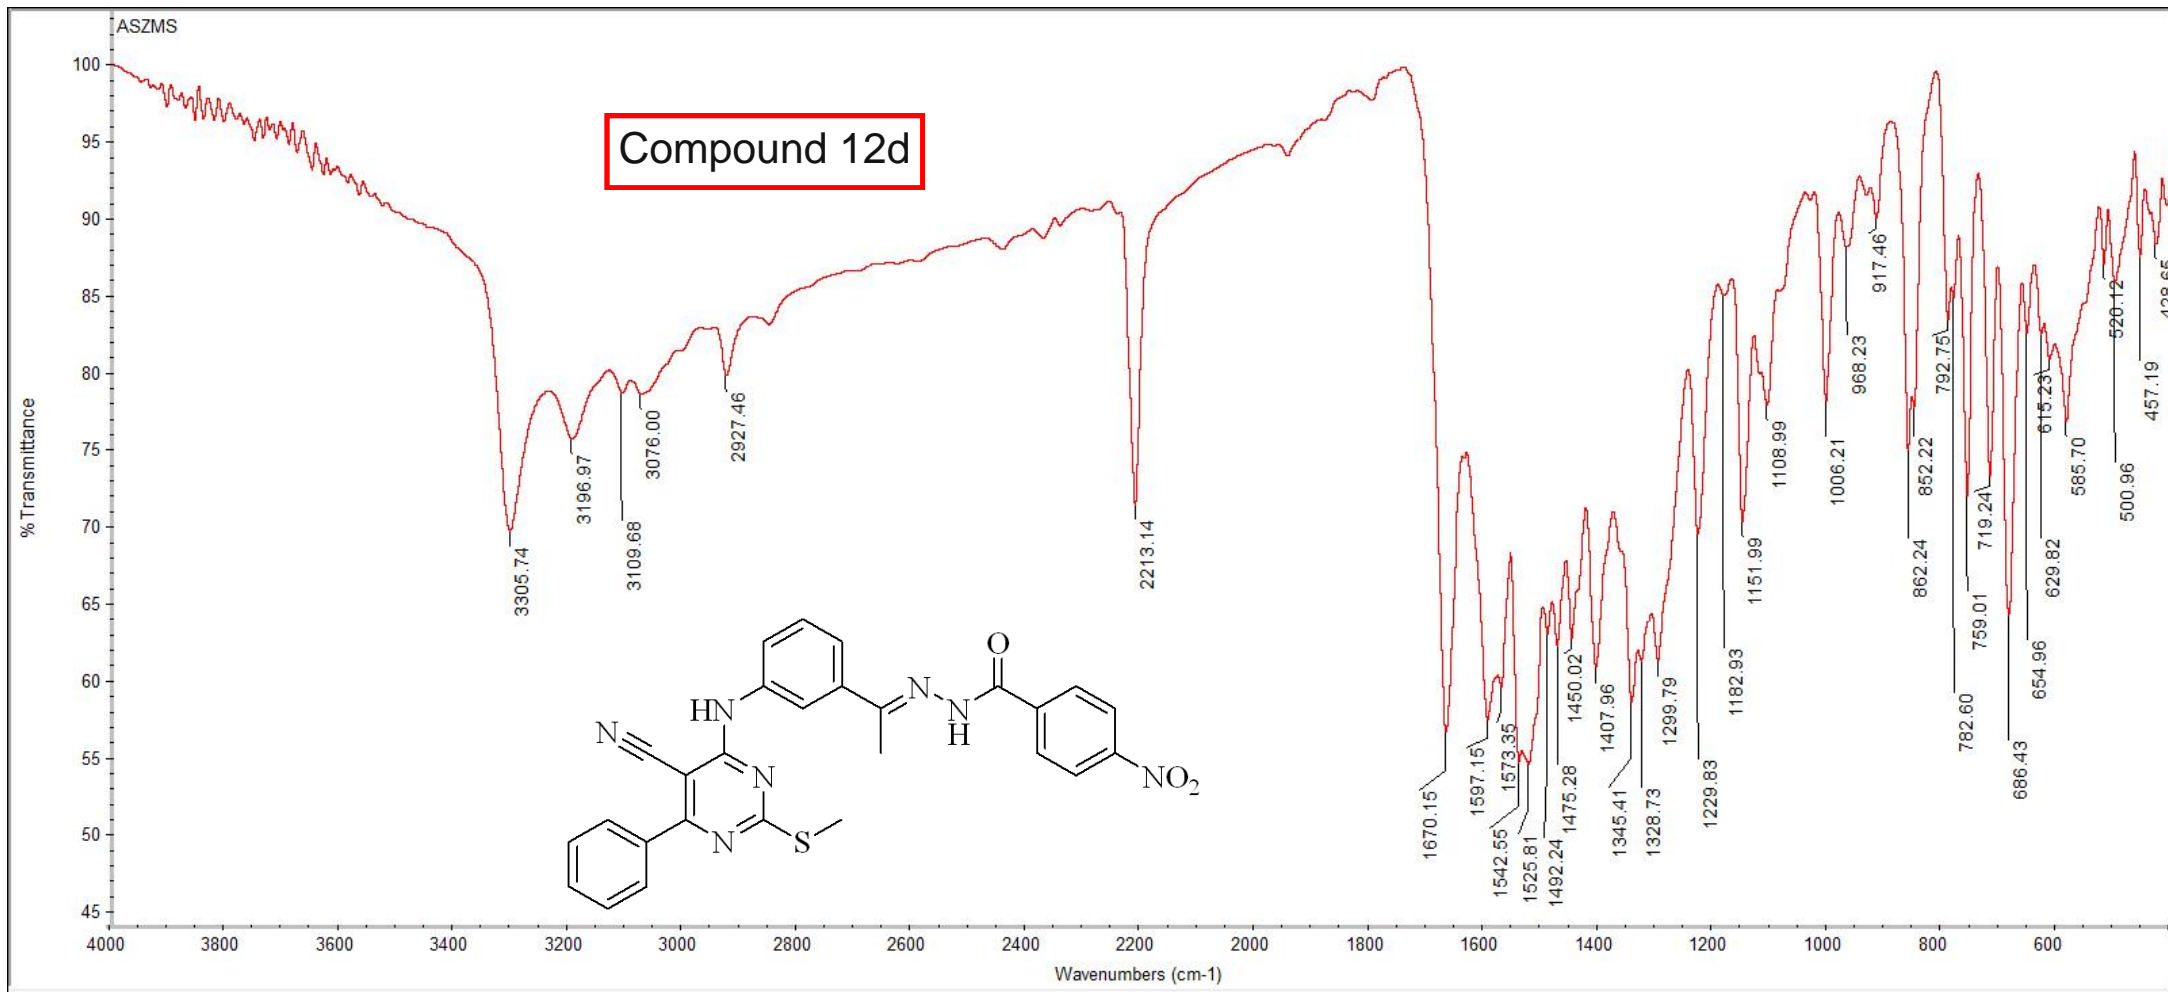

<sup>1</sup>H NMR 11h

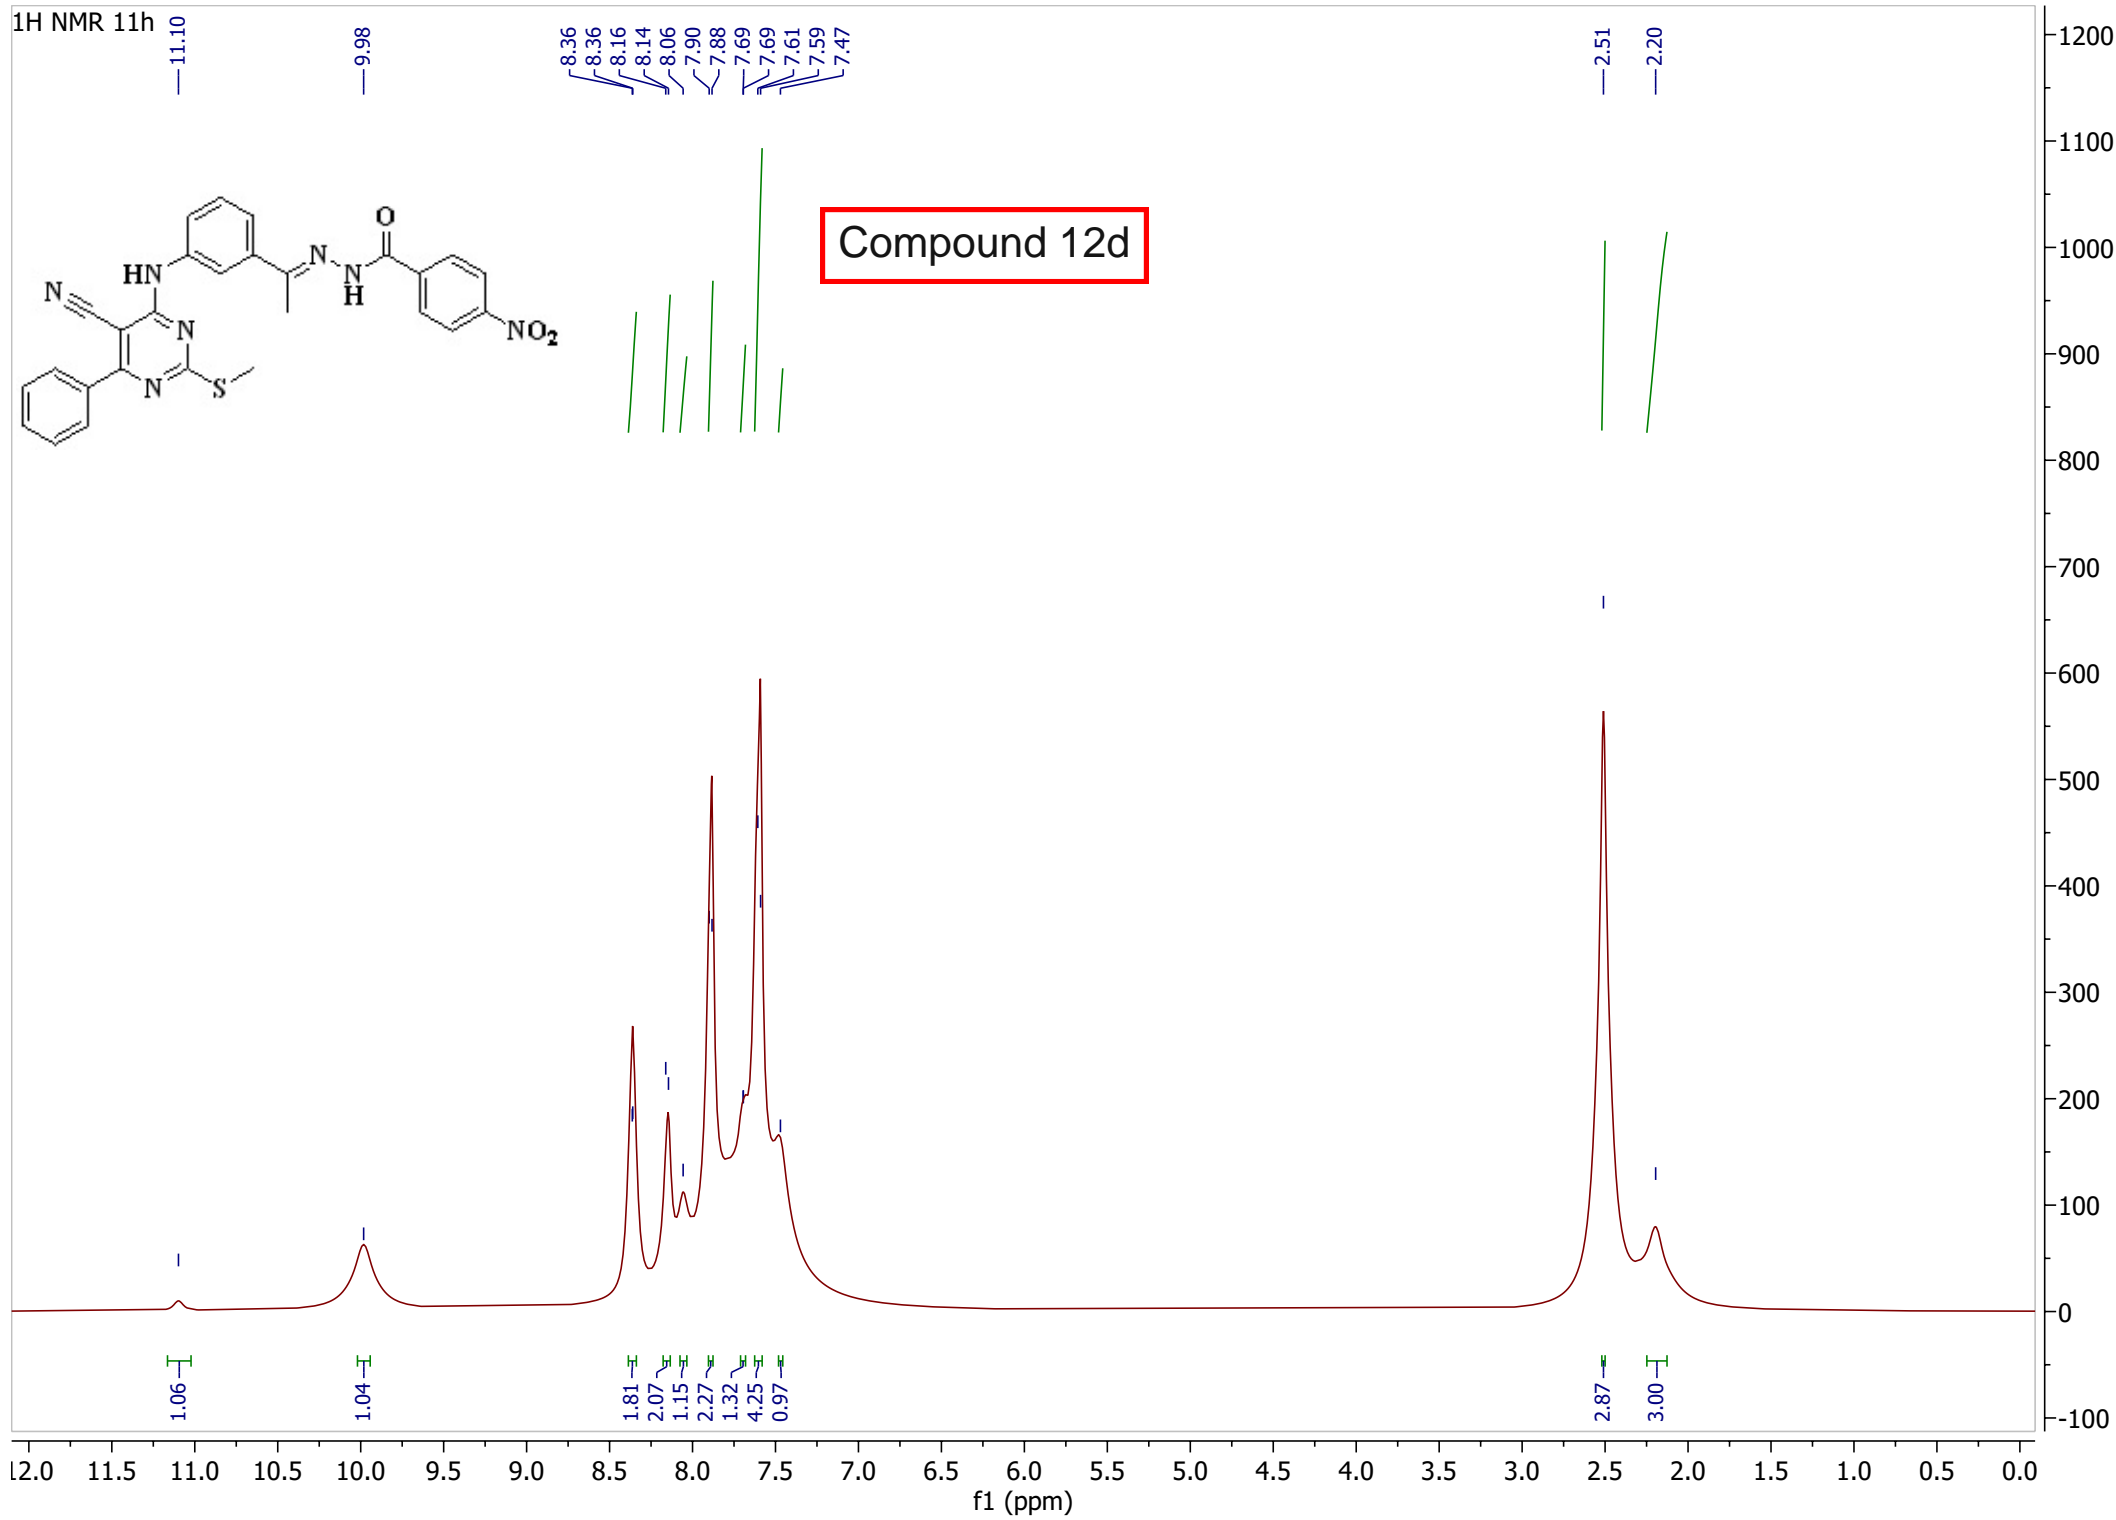



<sup>1</sup>H NMR 11h

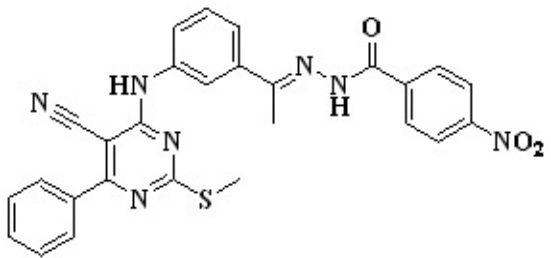

Compound 12d

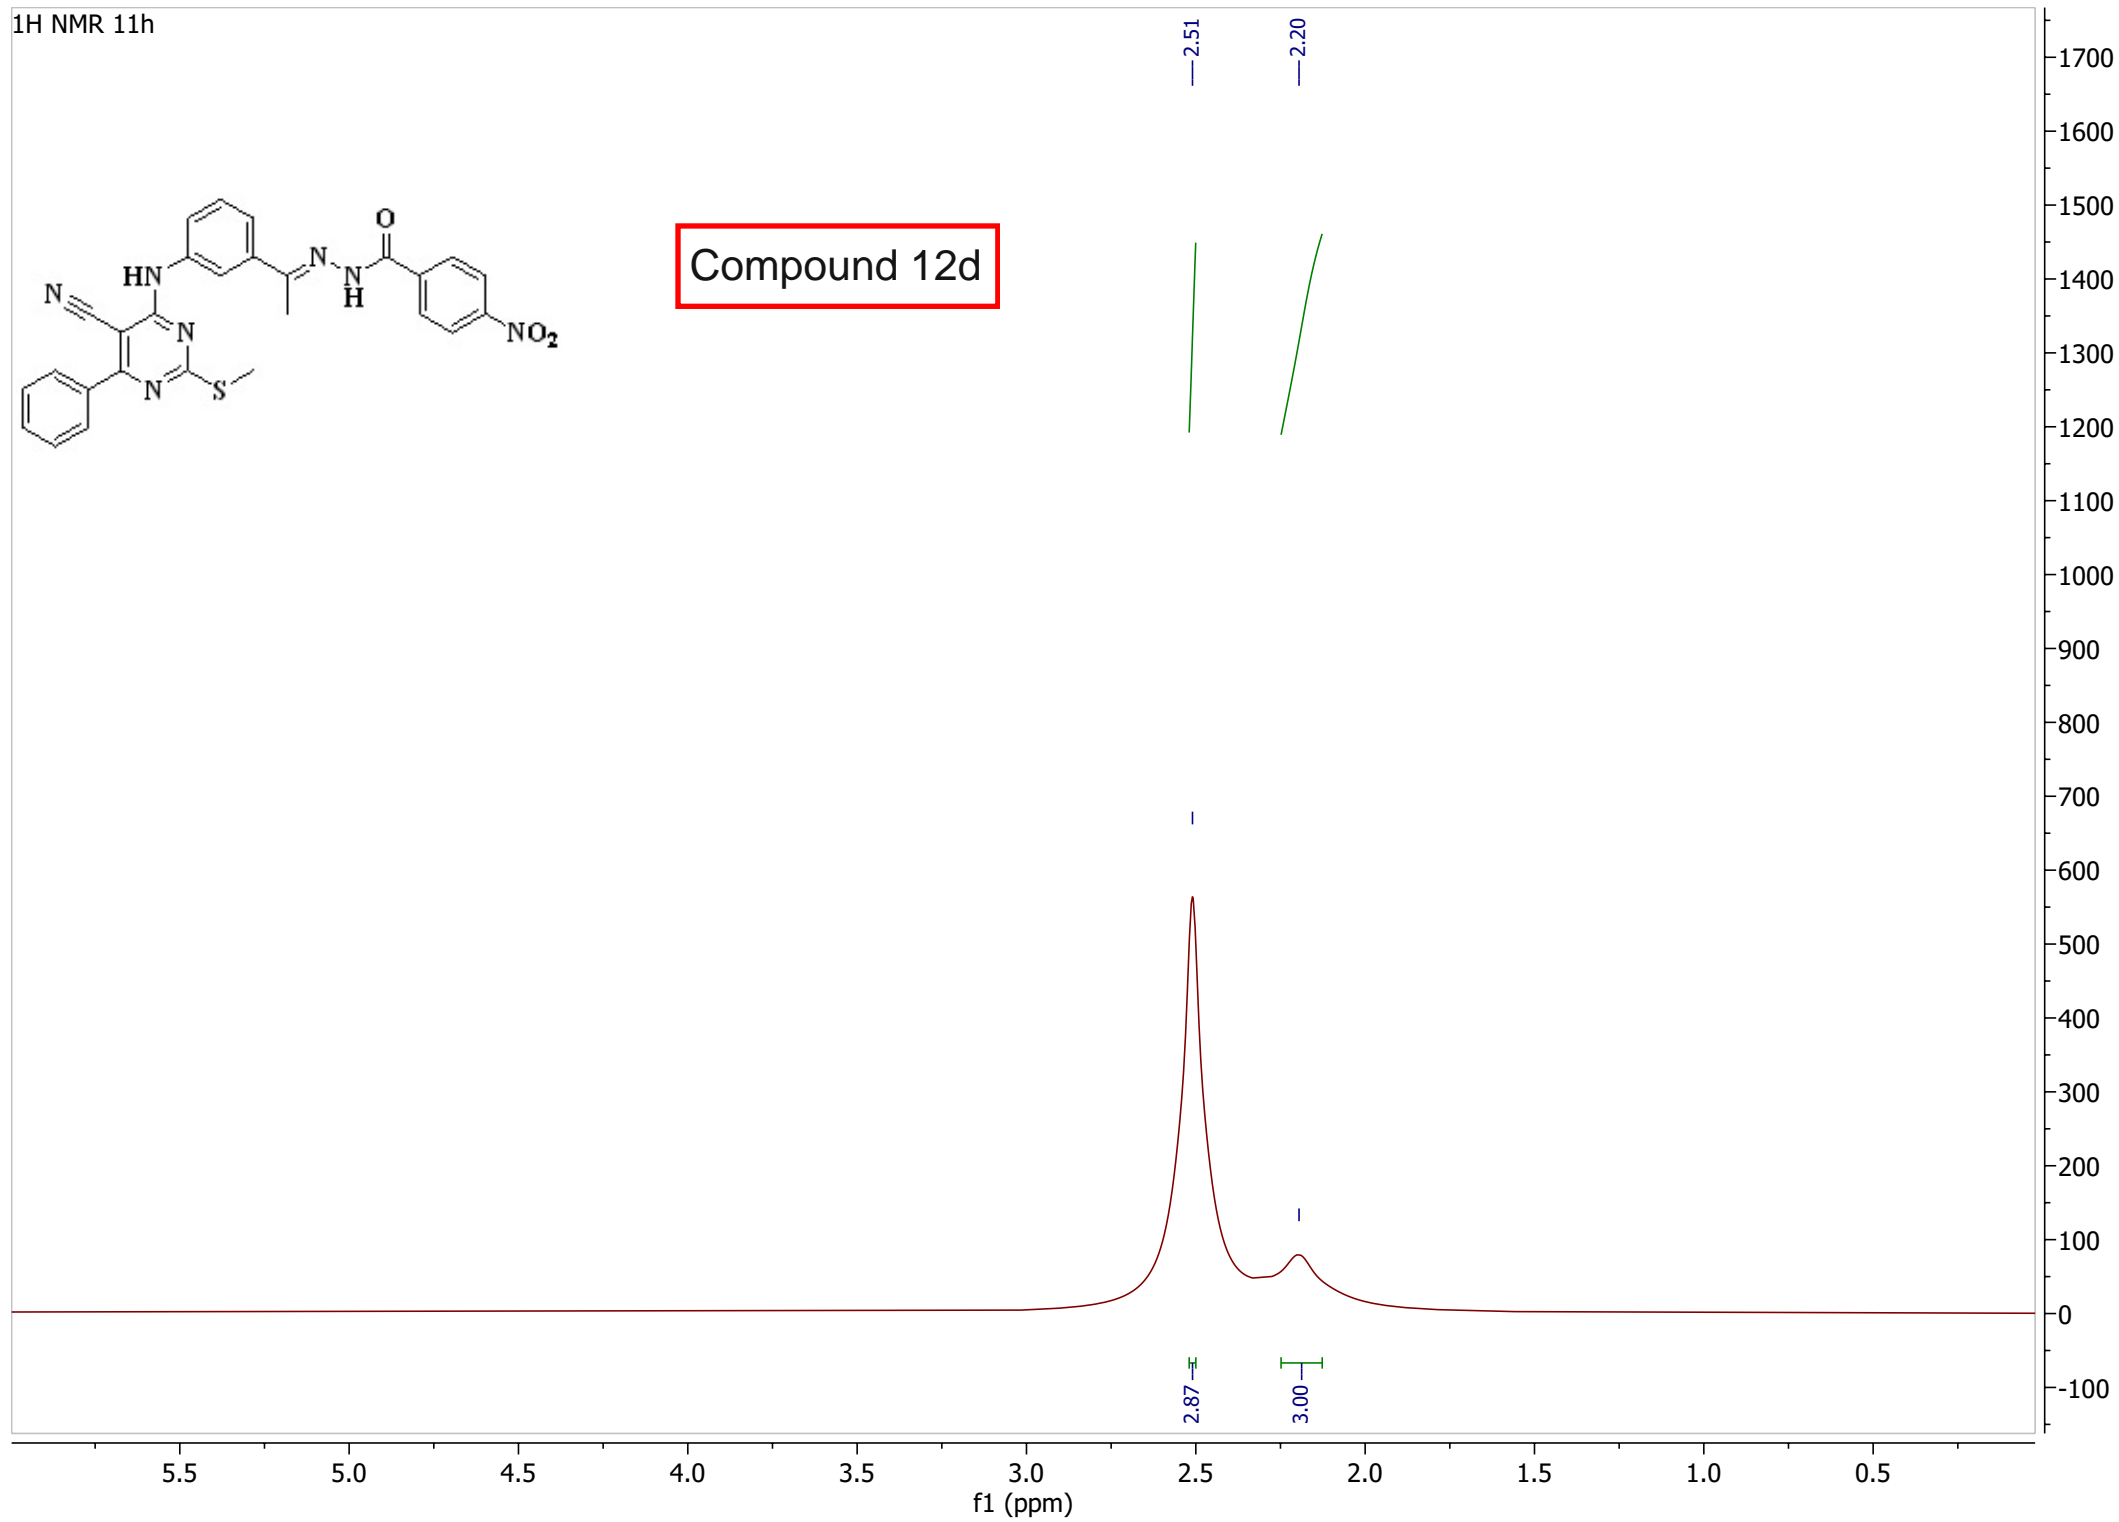

<sup>1</sup>H NMR 11h

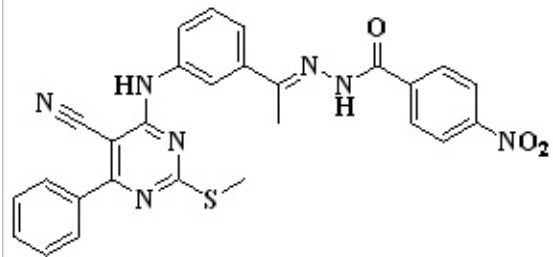

Compound 12d

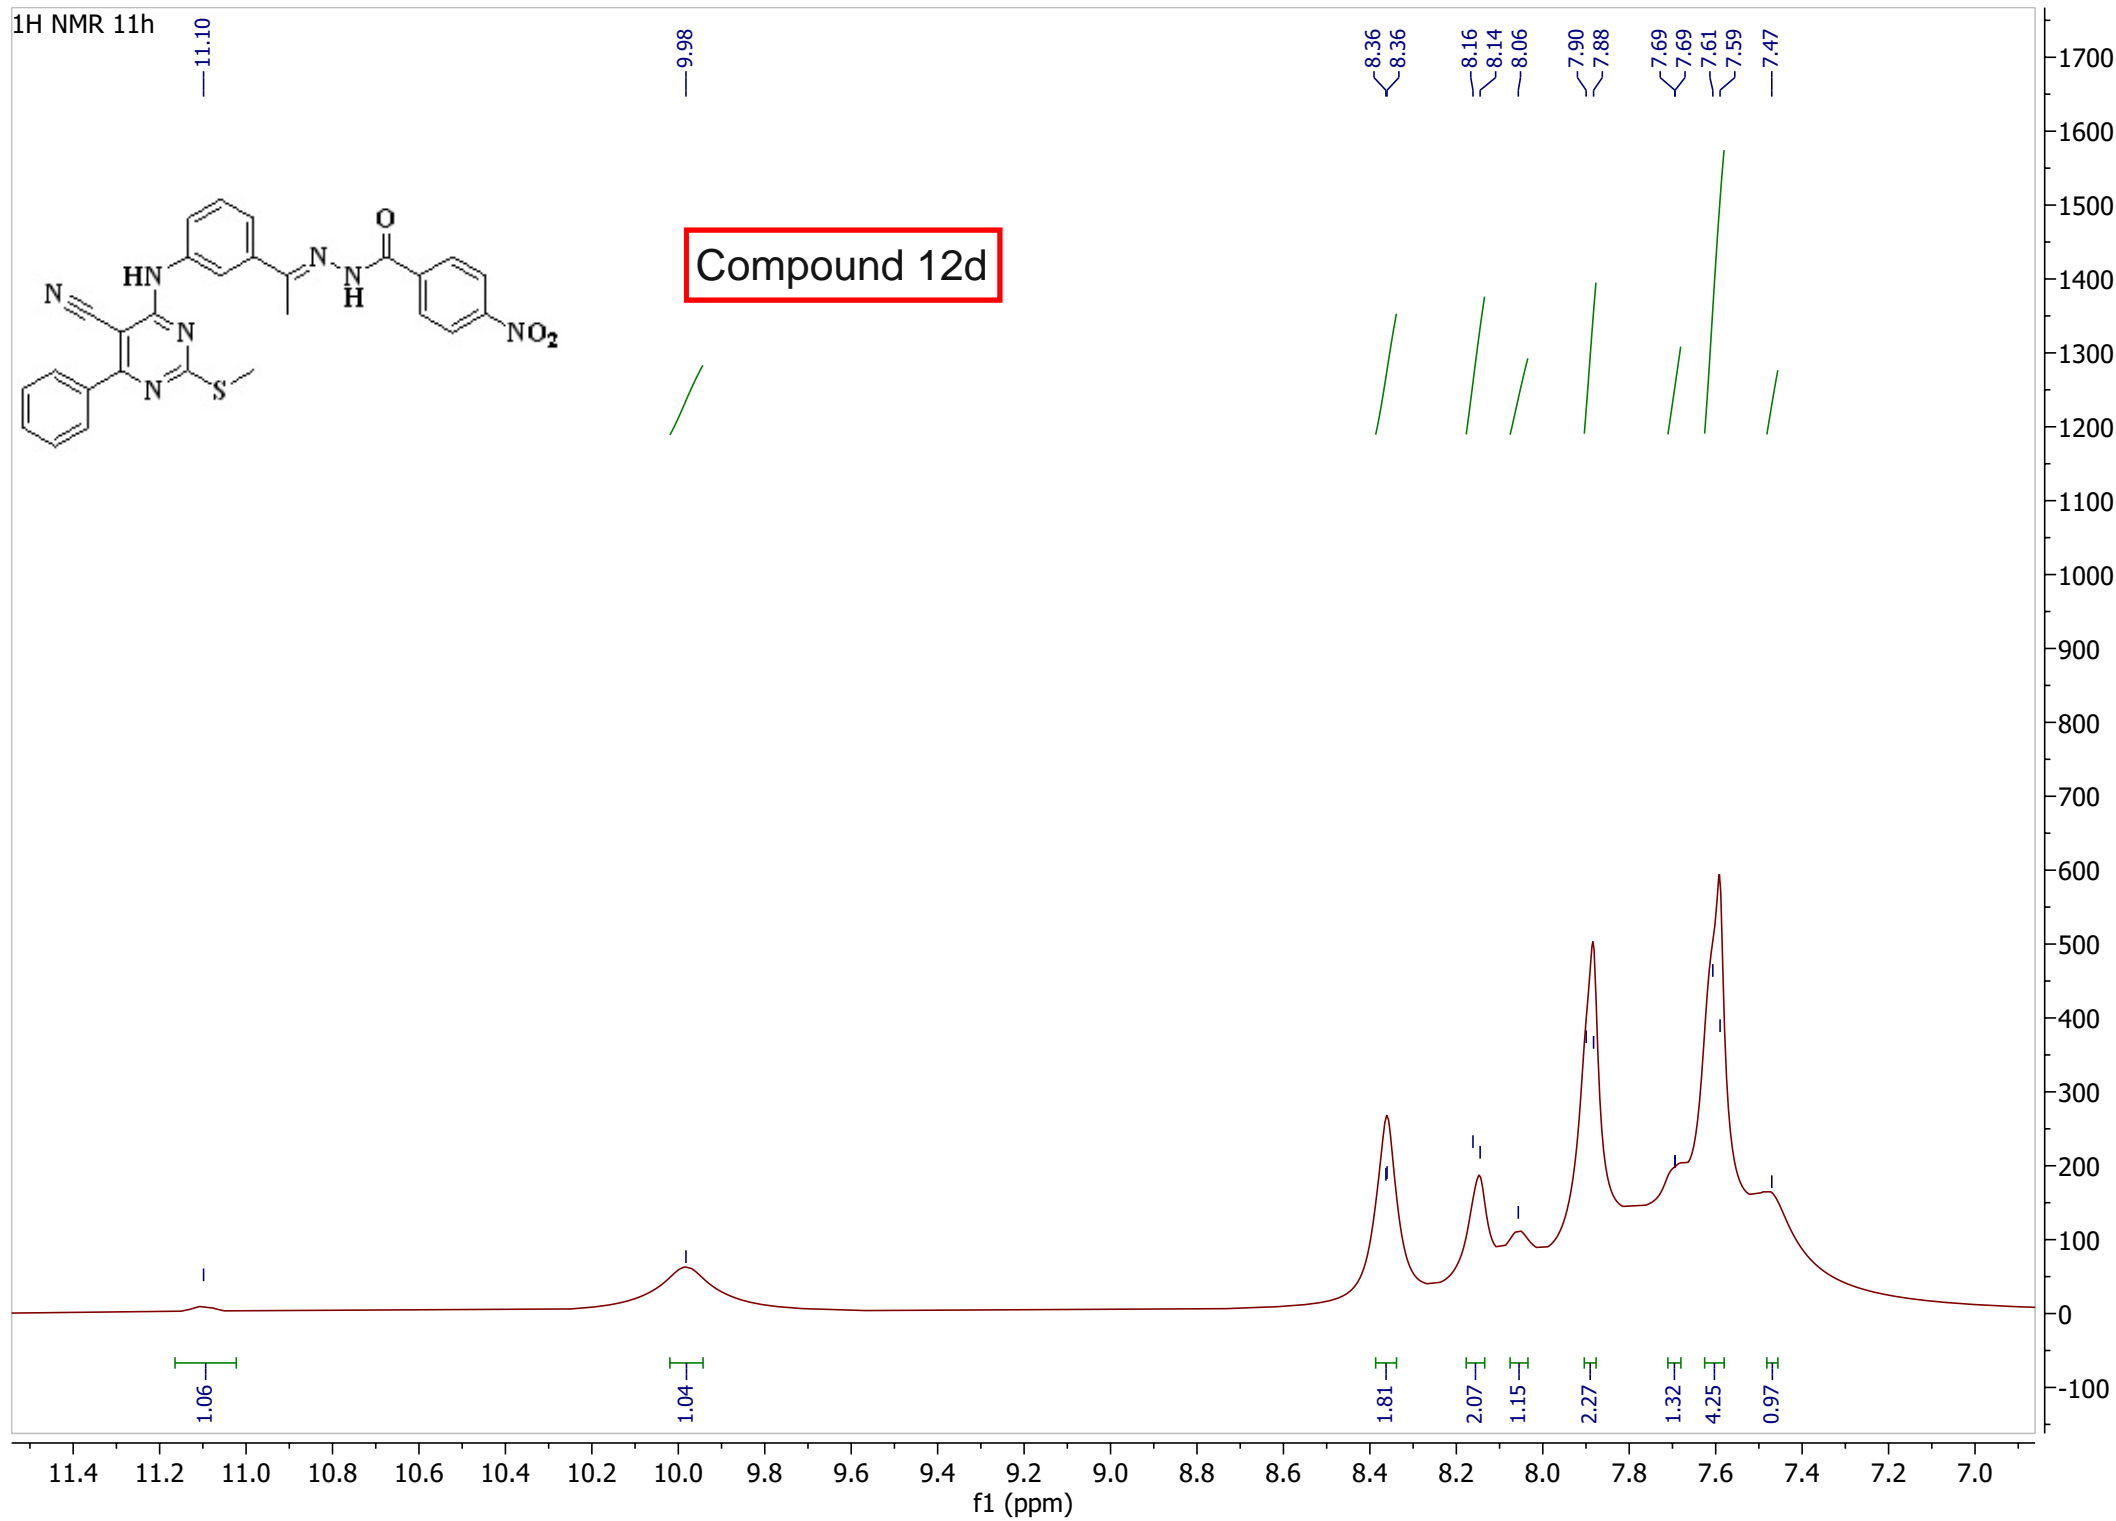

<sup>1</sup>H NMR 11h

— 174.61  
— 168.58  
— 164.39  
— 163.07  
— 160.56

138.15  
137.19  
136.39  
131.65  
129.95  
129.19  
129.05  
129.01  
128.92  
125.36  
124.02  
123.93  
123.70  
122.14  
116.50

— 85.11

15.04  
14.21

Compound 12d

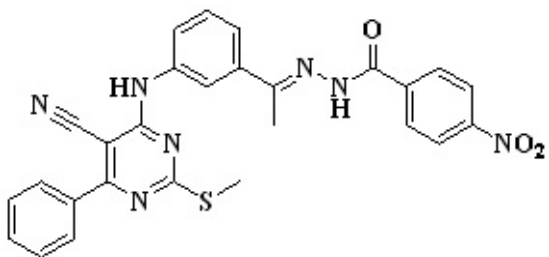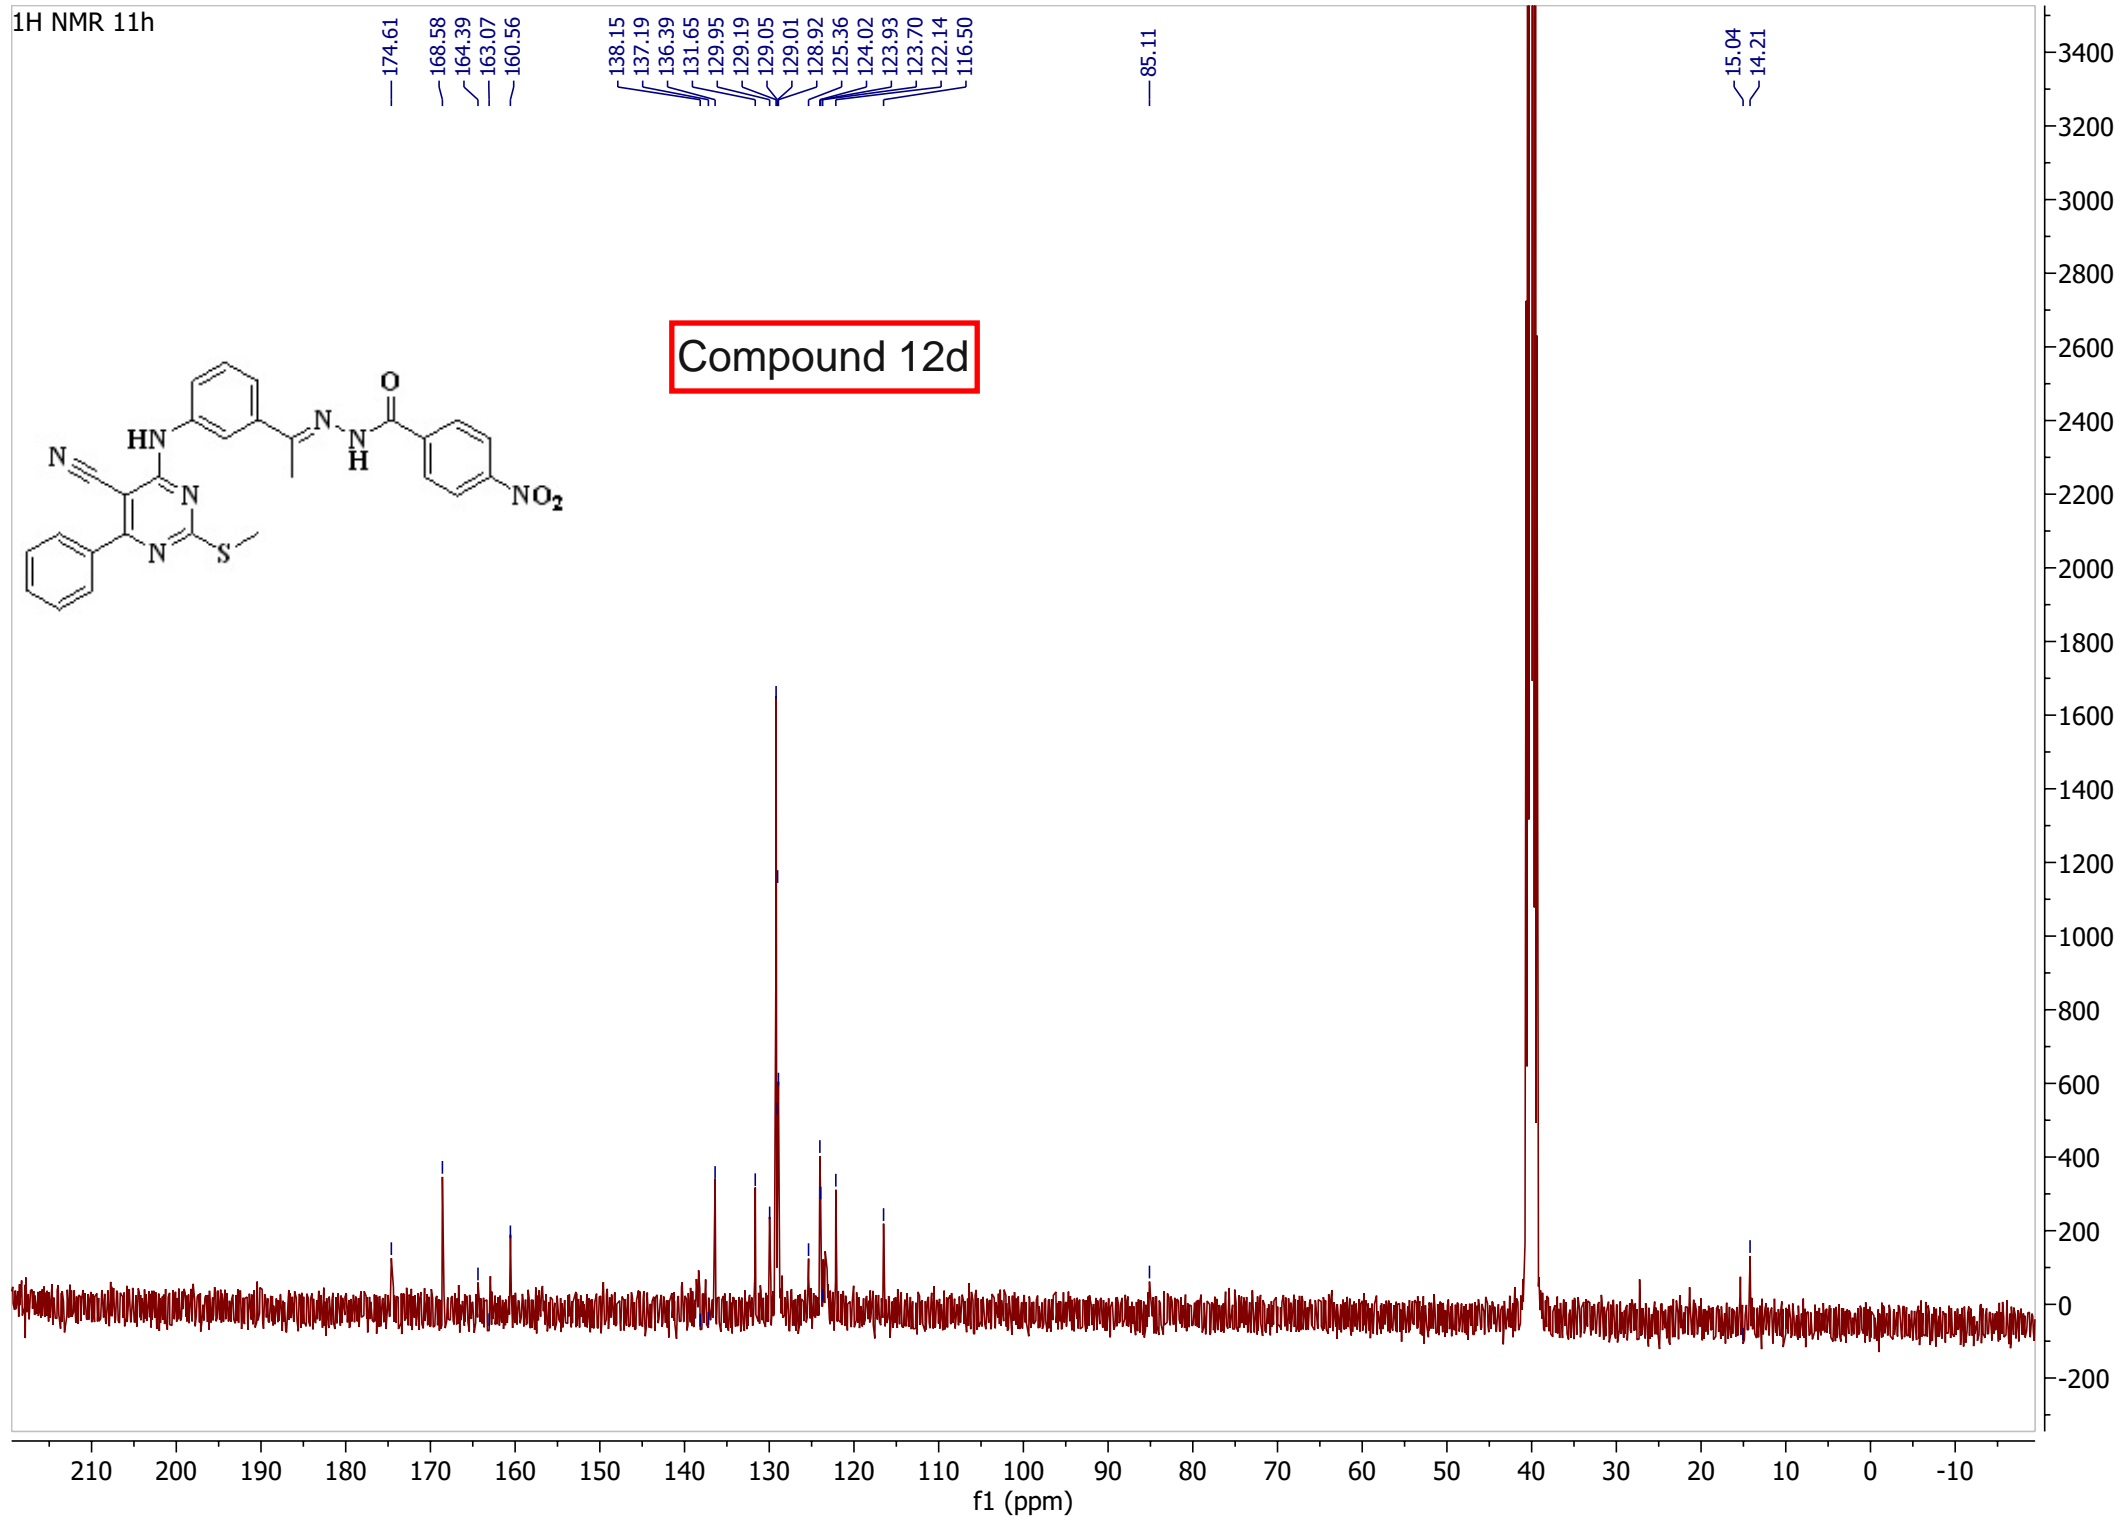

<sup>1</sup>H NMR 11h

85.11

15.04  
14.21

Compound 12d

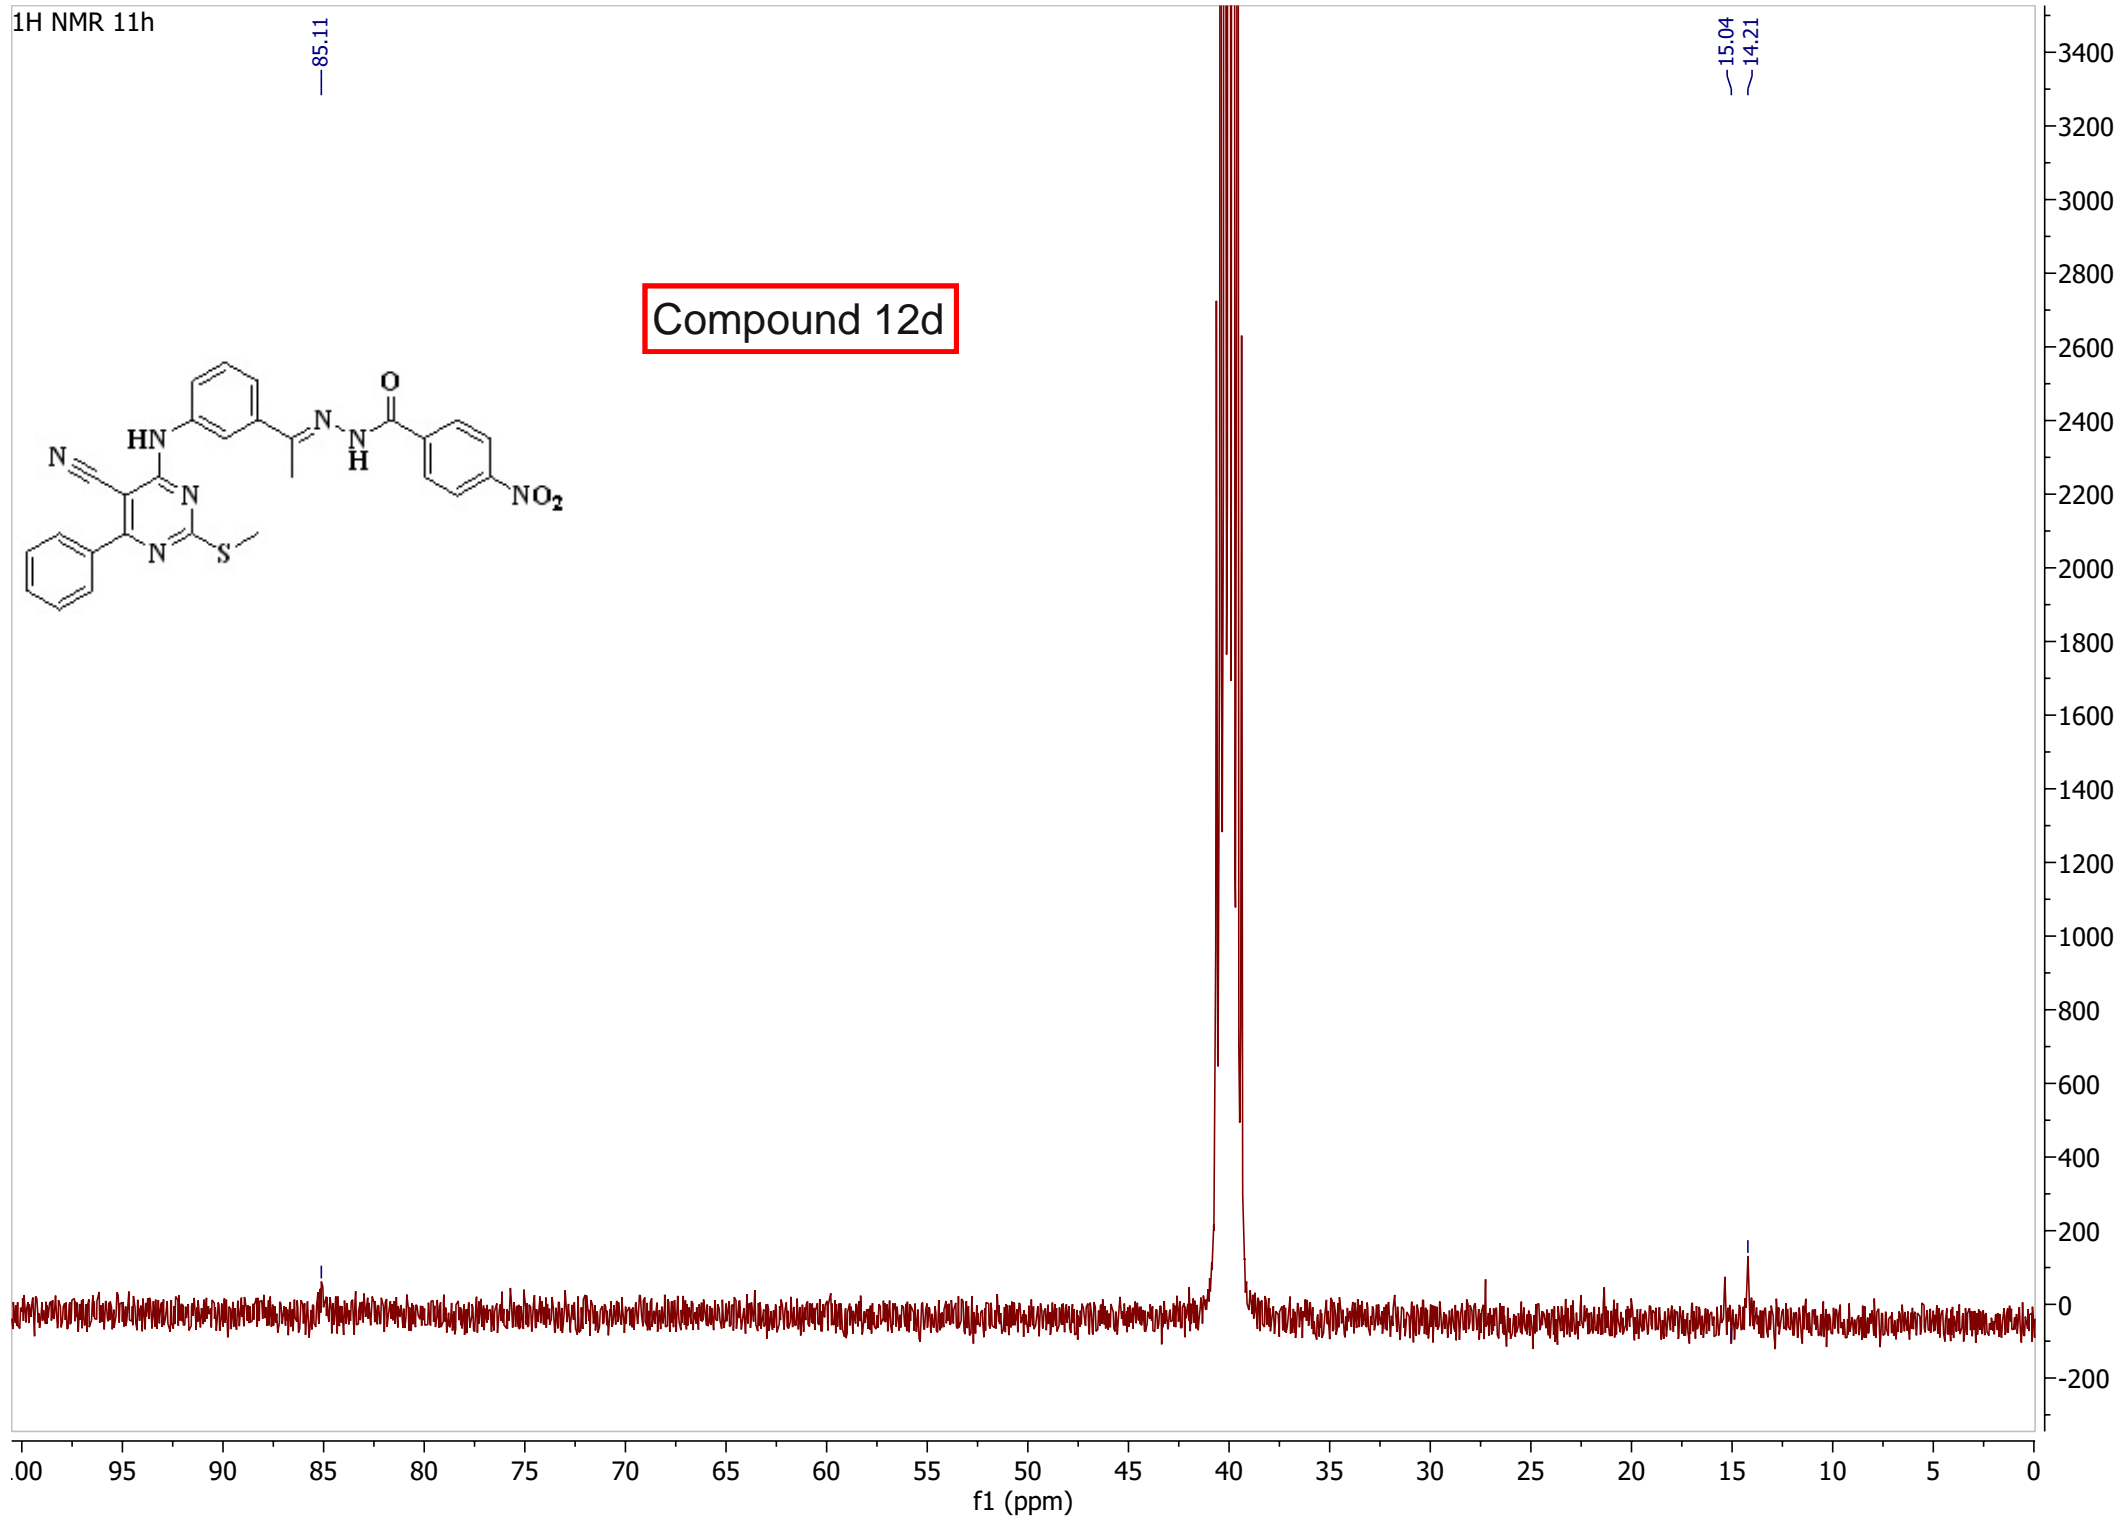

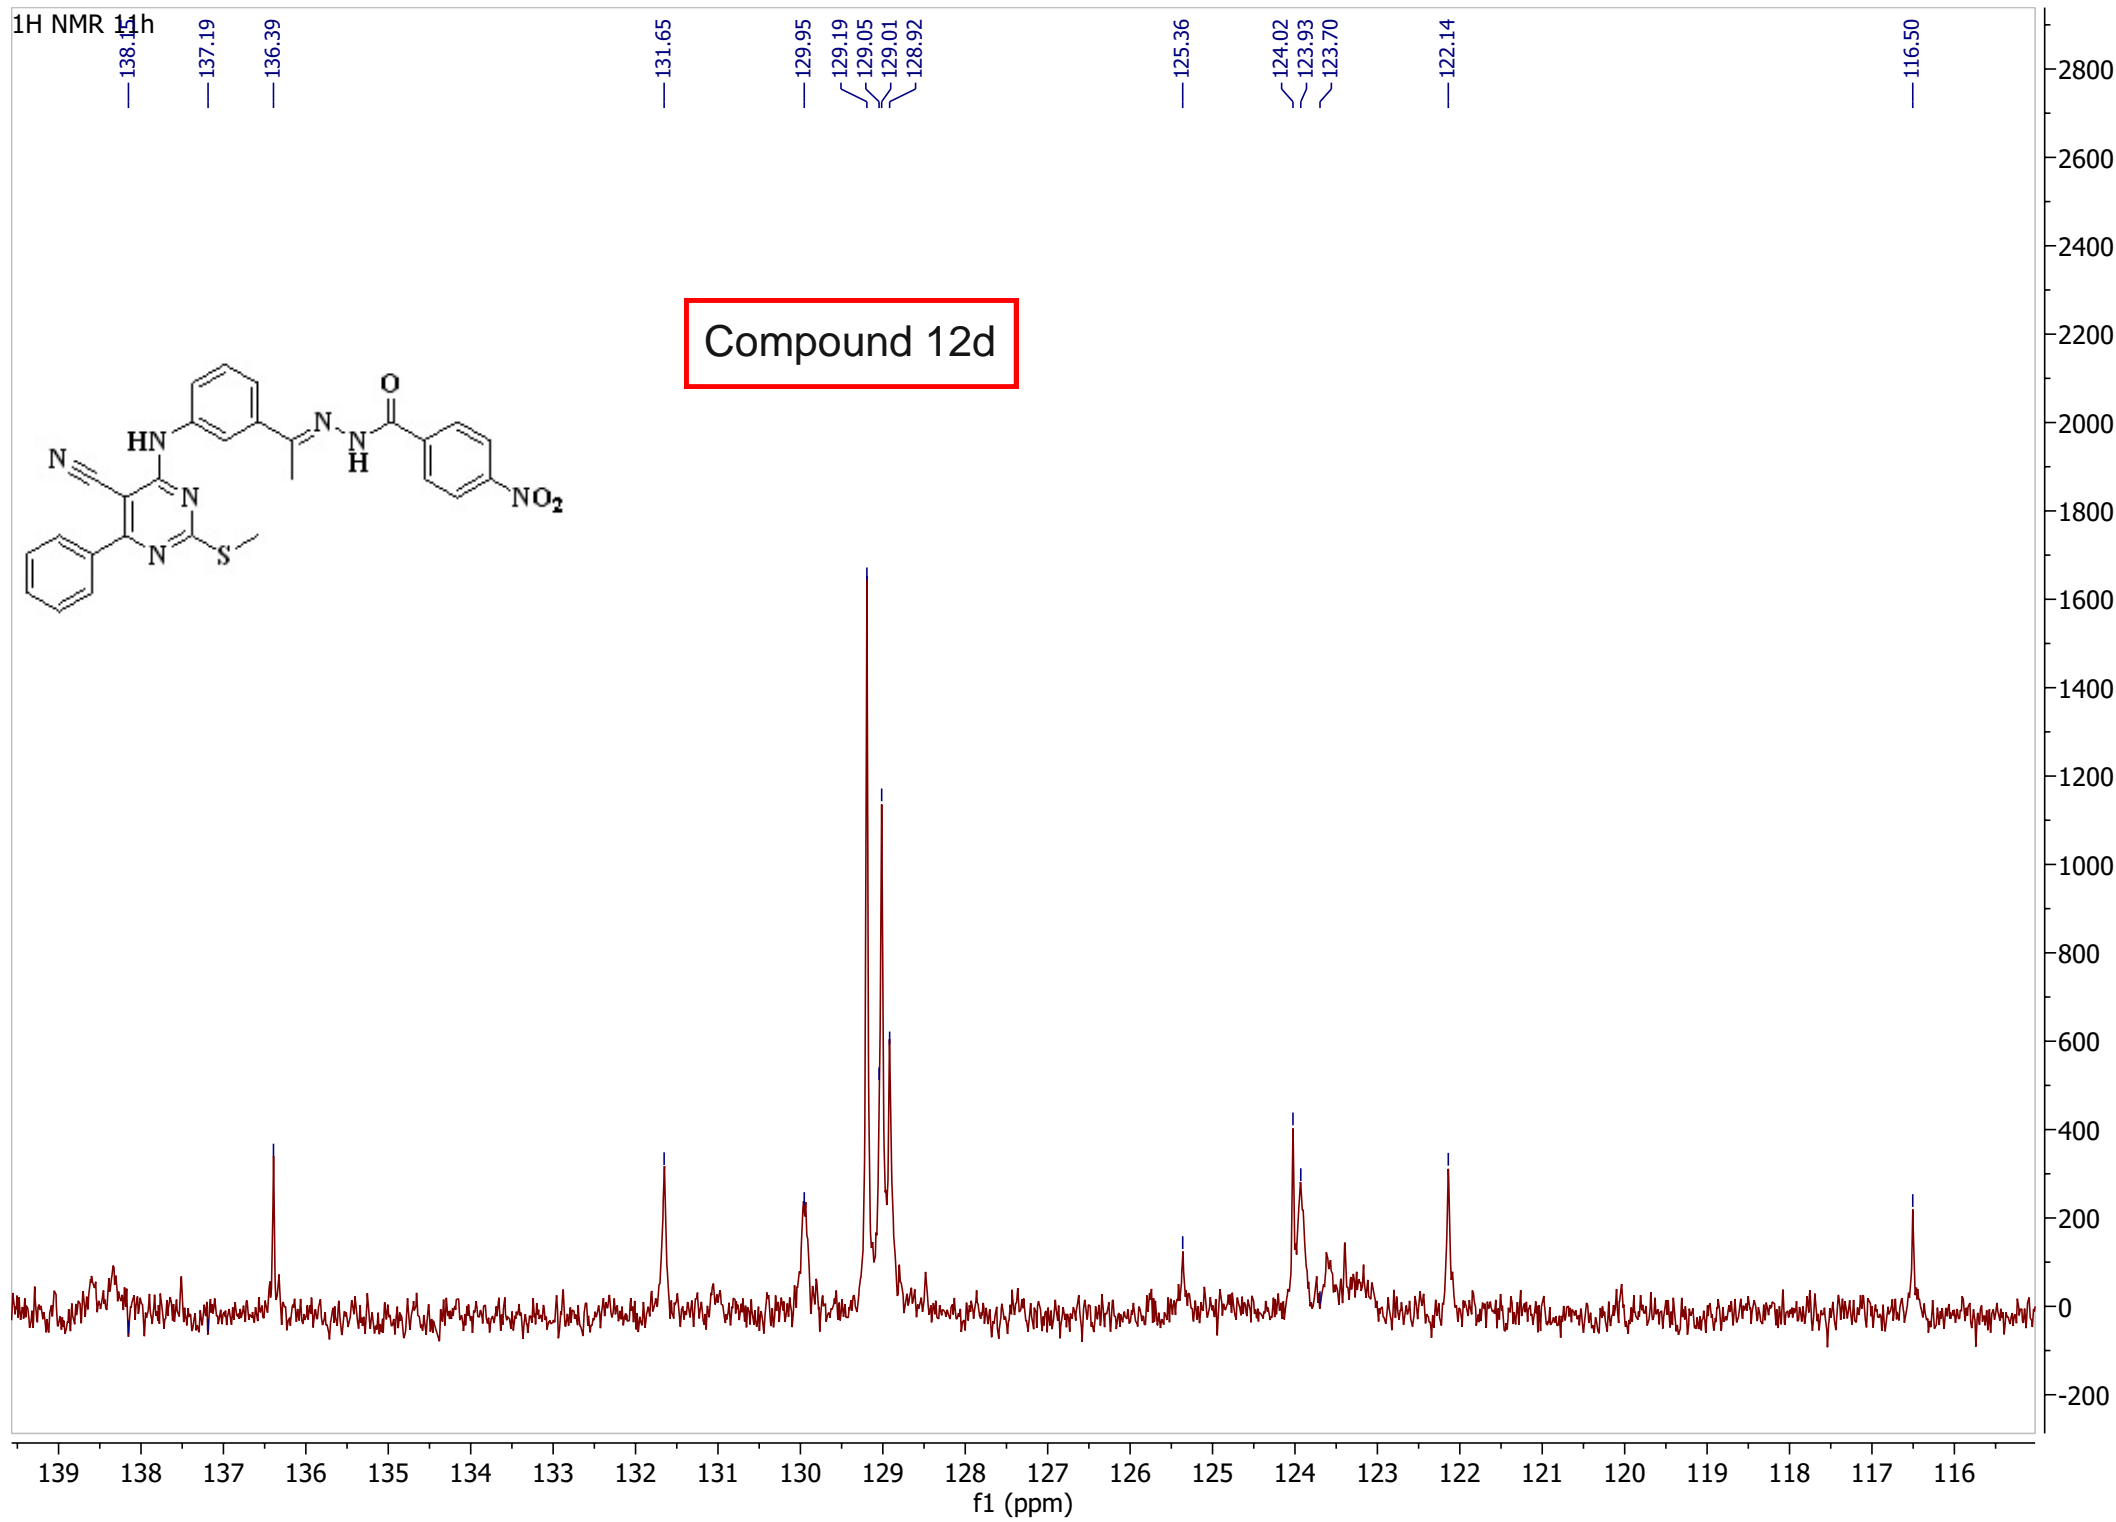

<sup>1</sup>H NMR 11h

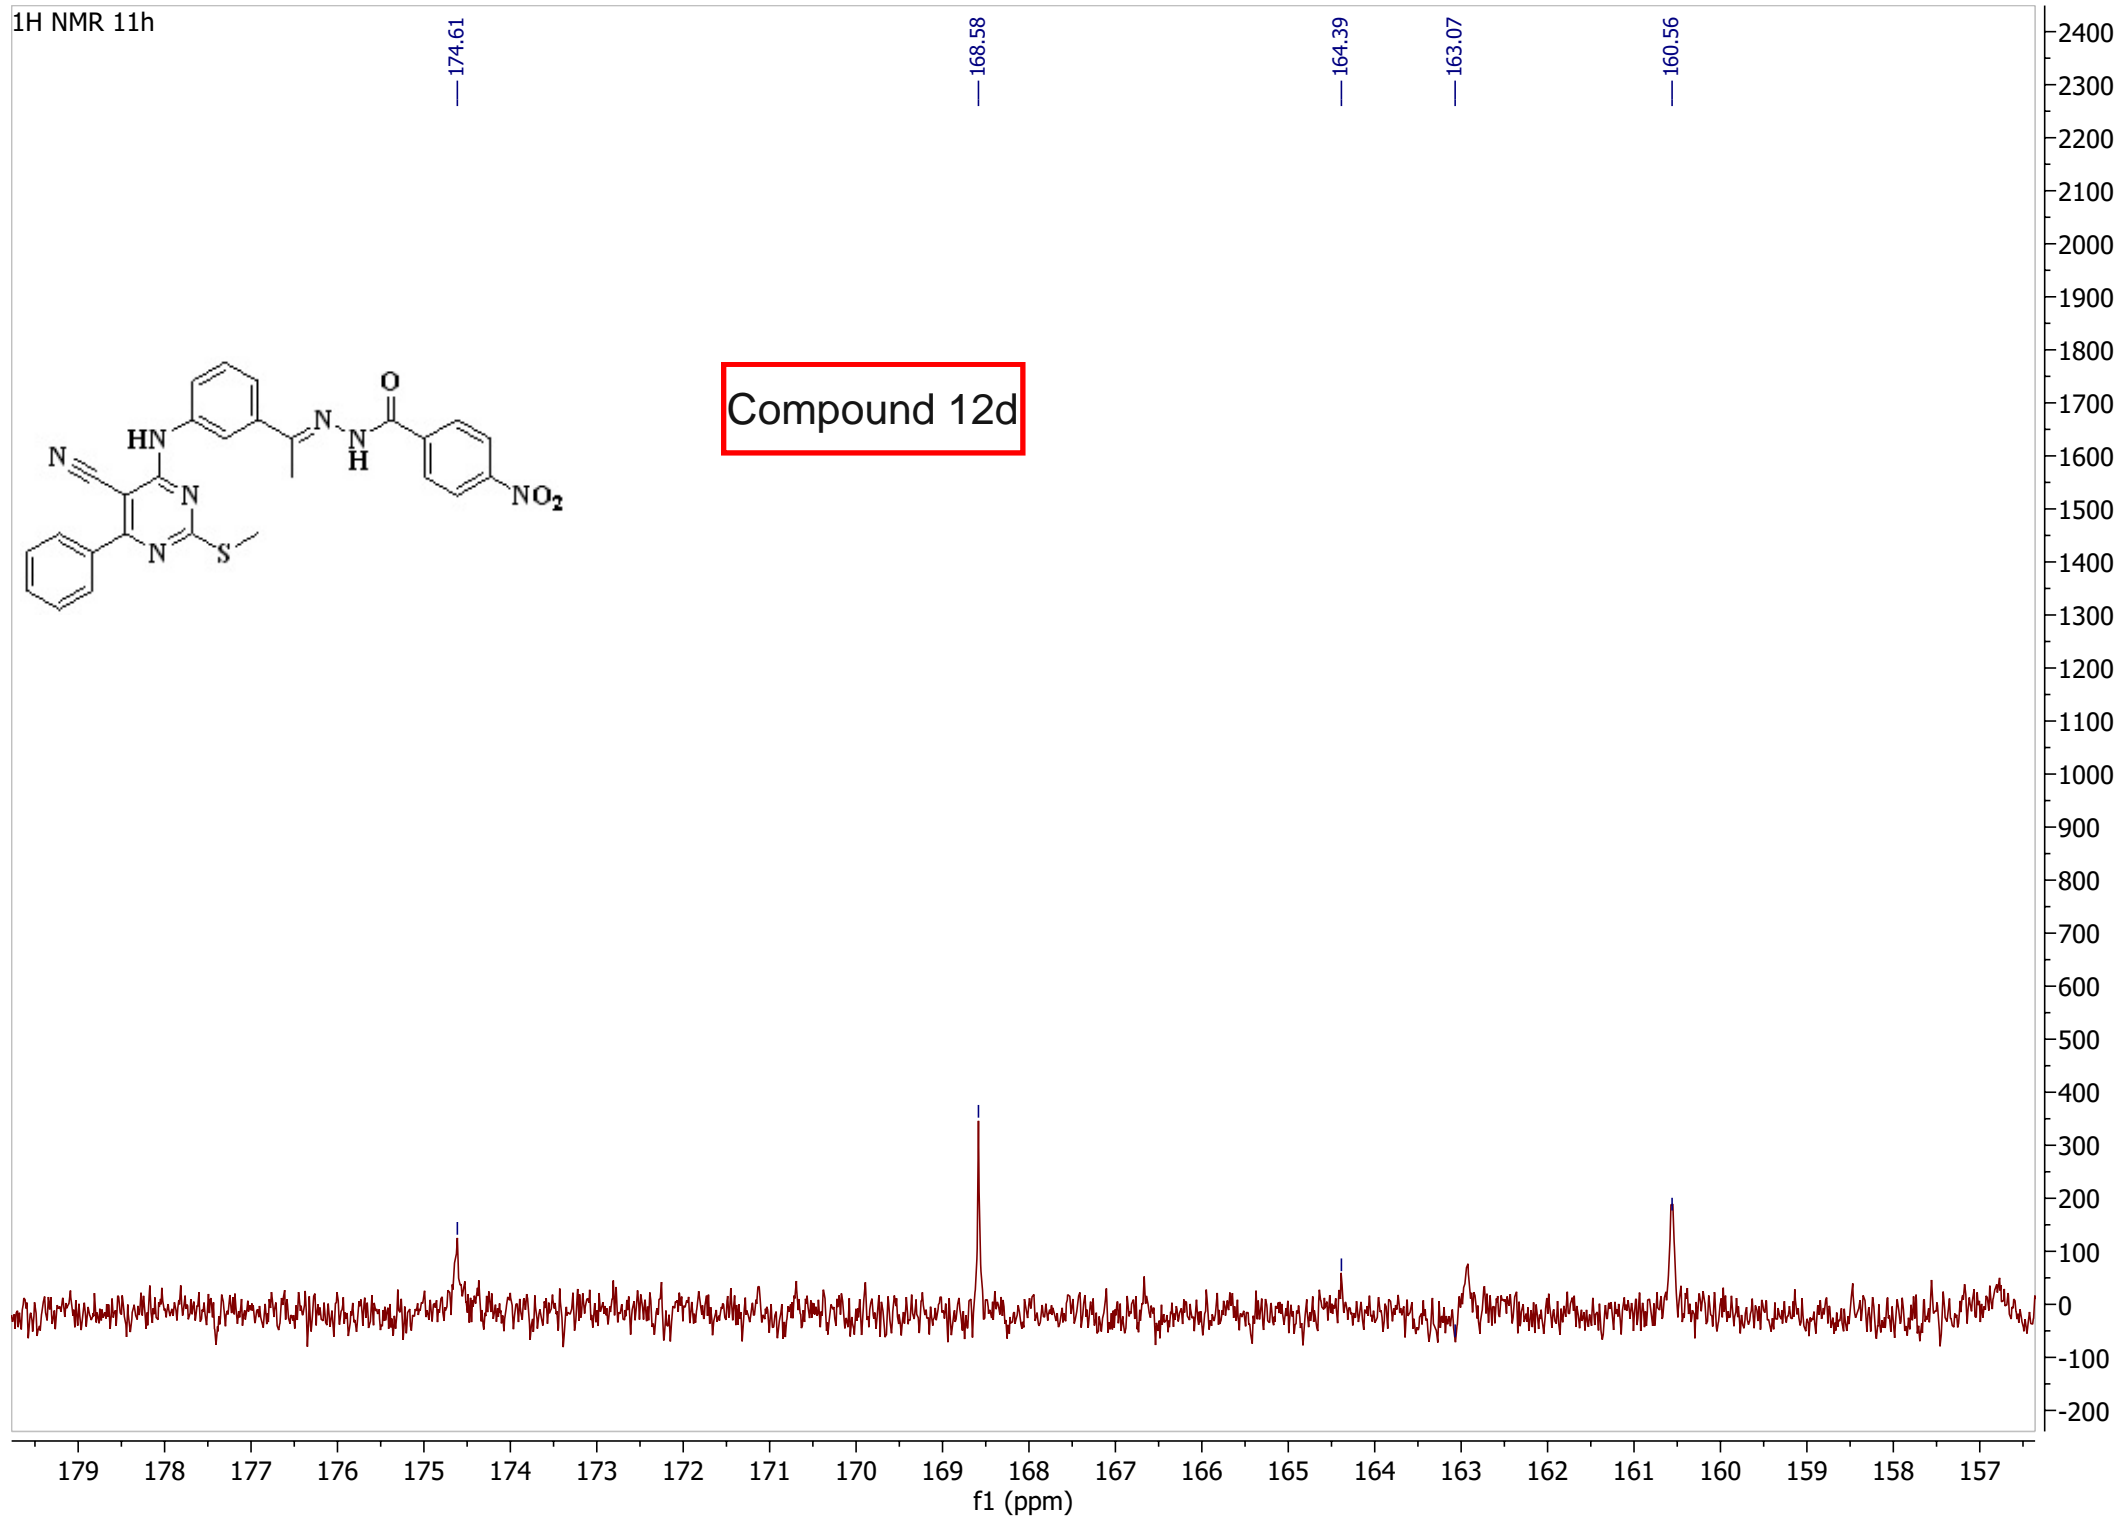

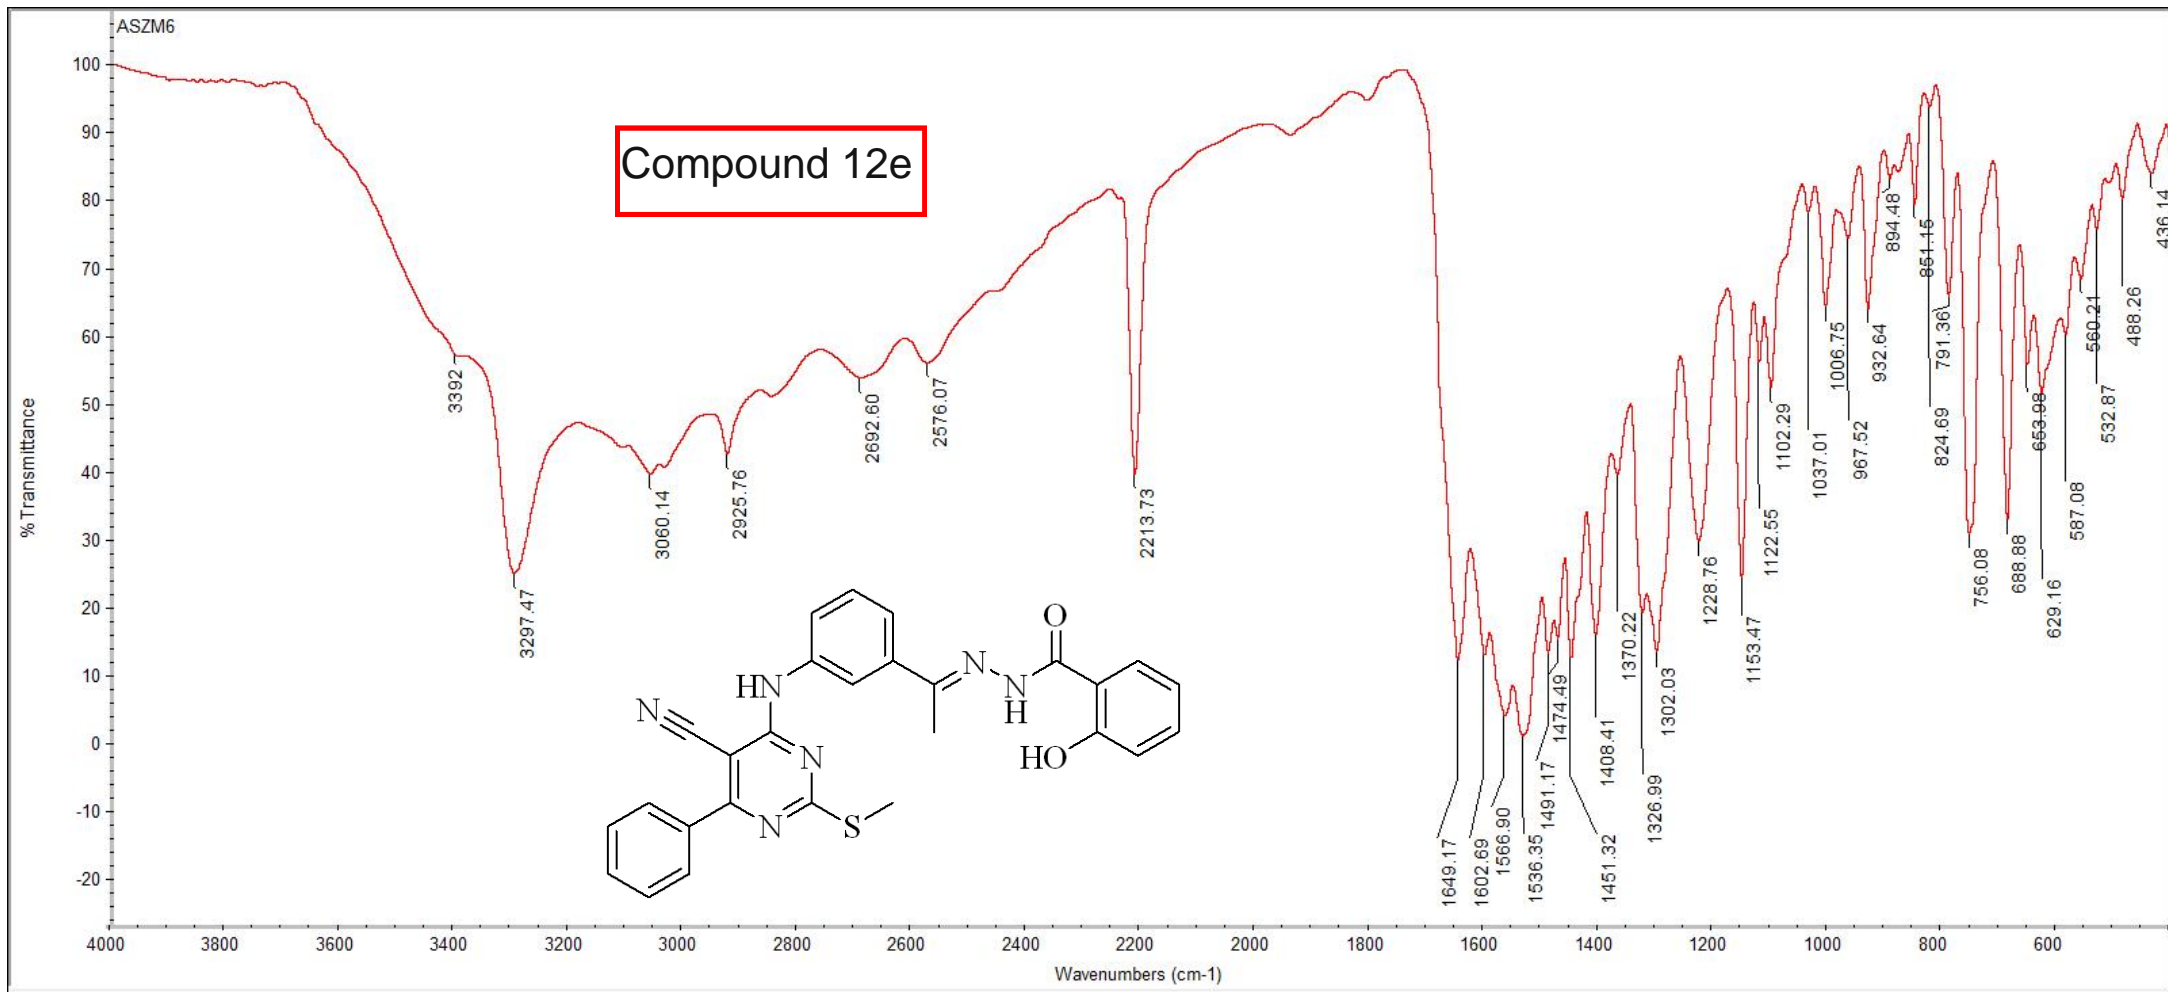

<sup>1</sup>H NMR 11h

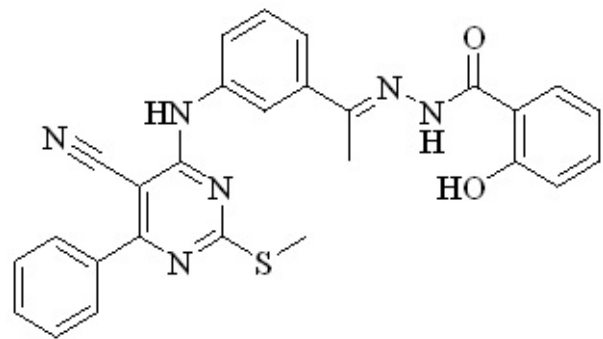

Compound 12e

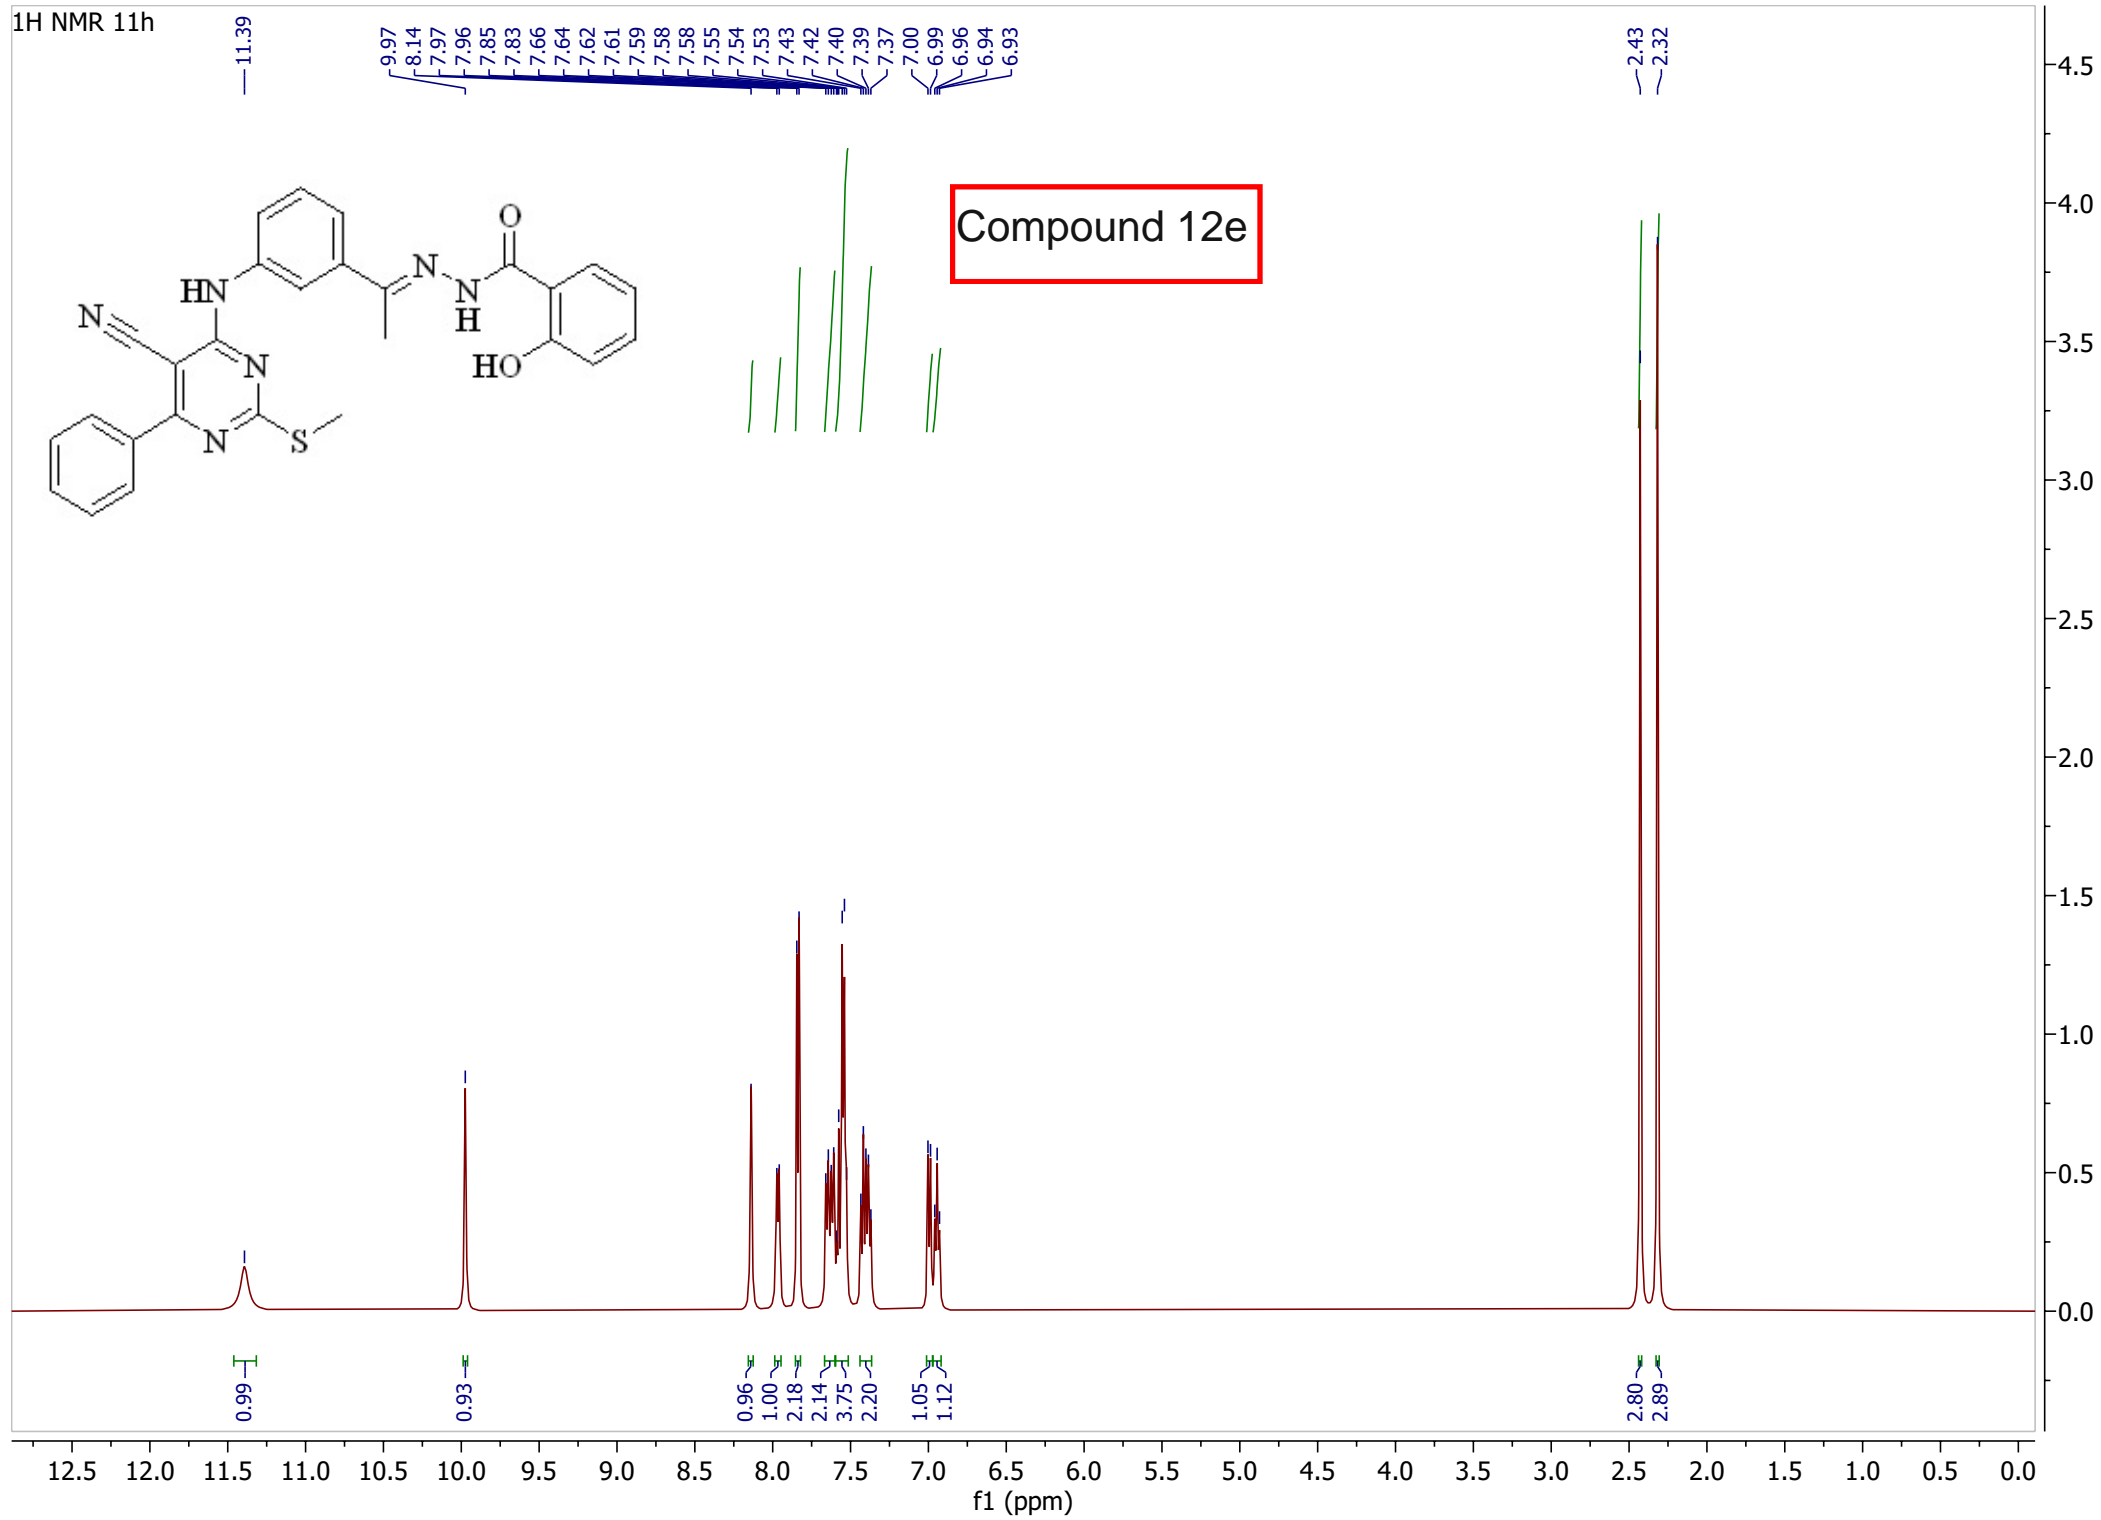



1H NMR 11h

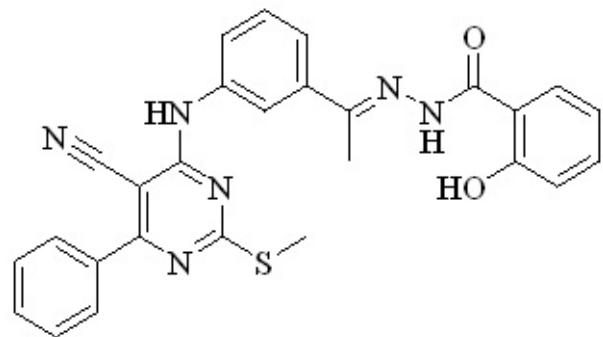

Compound 12e

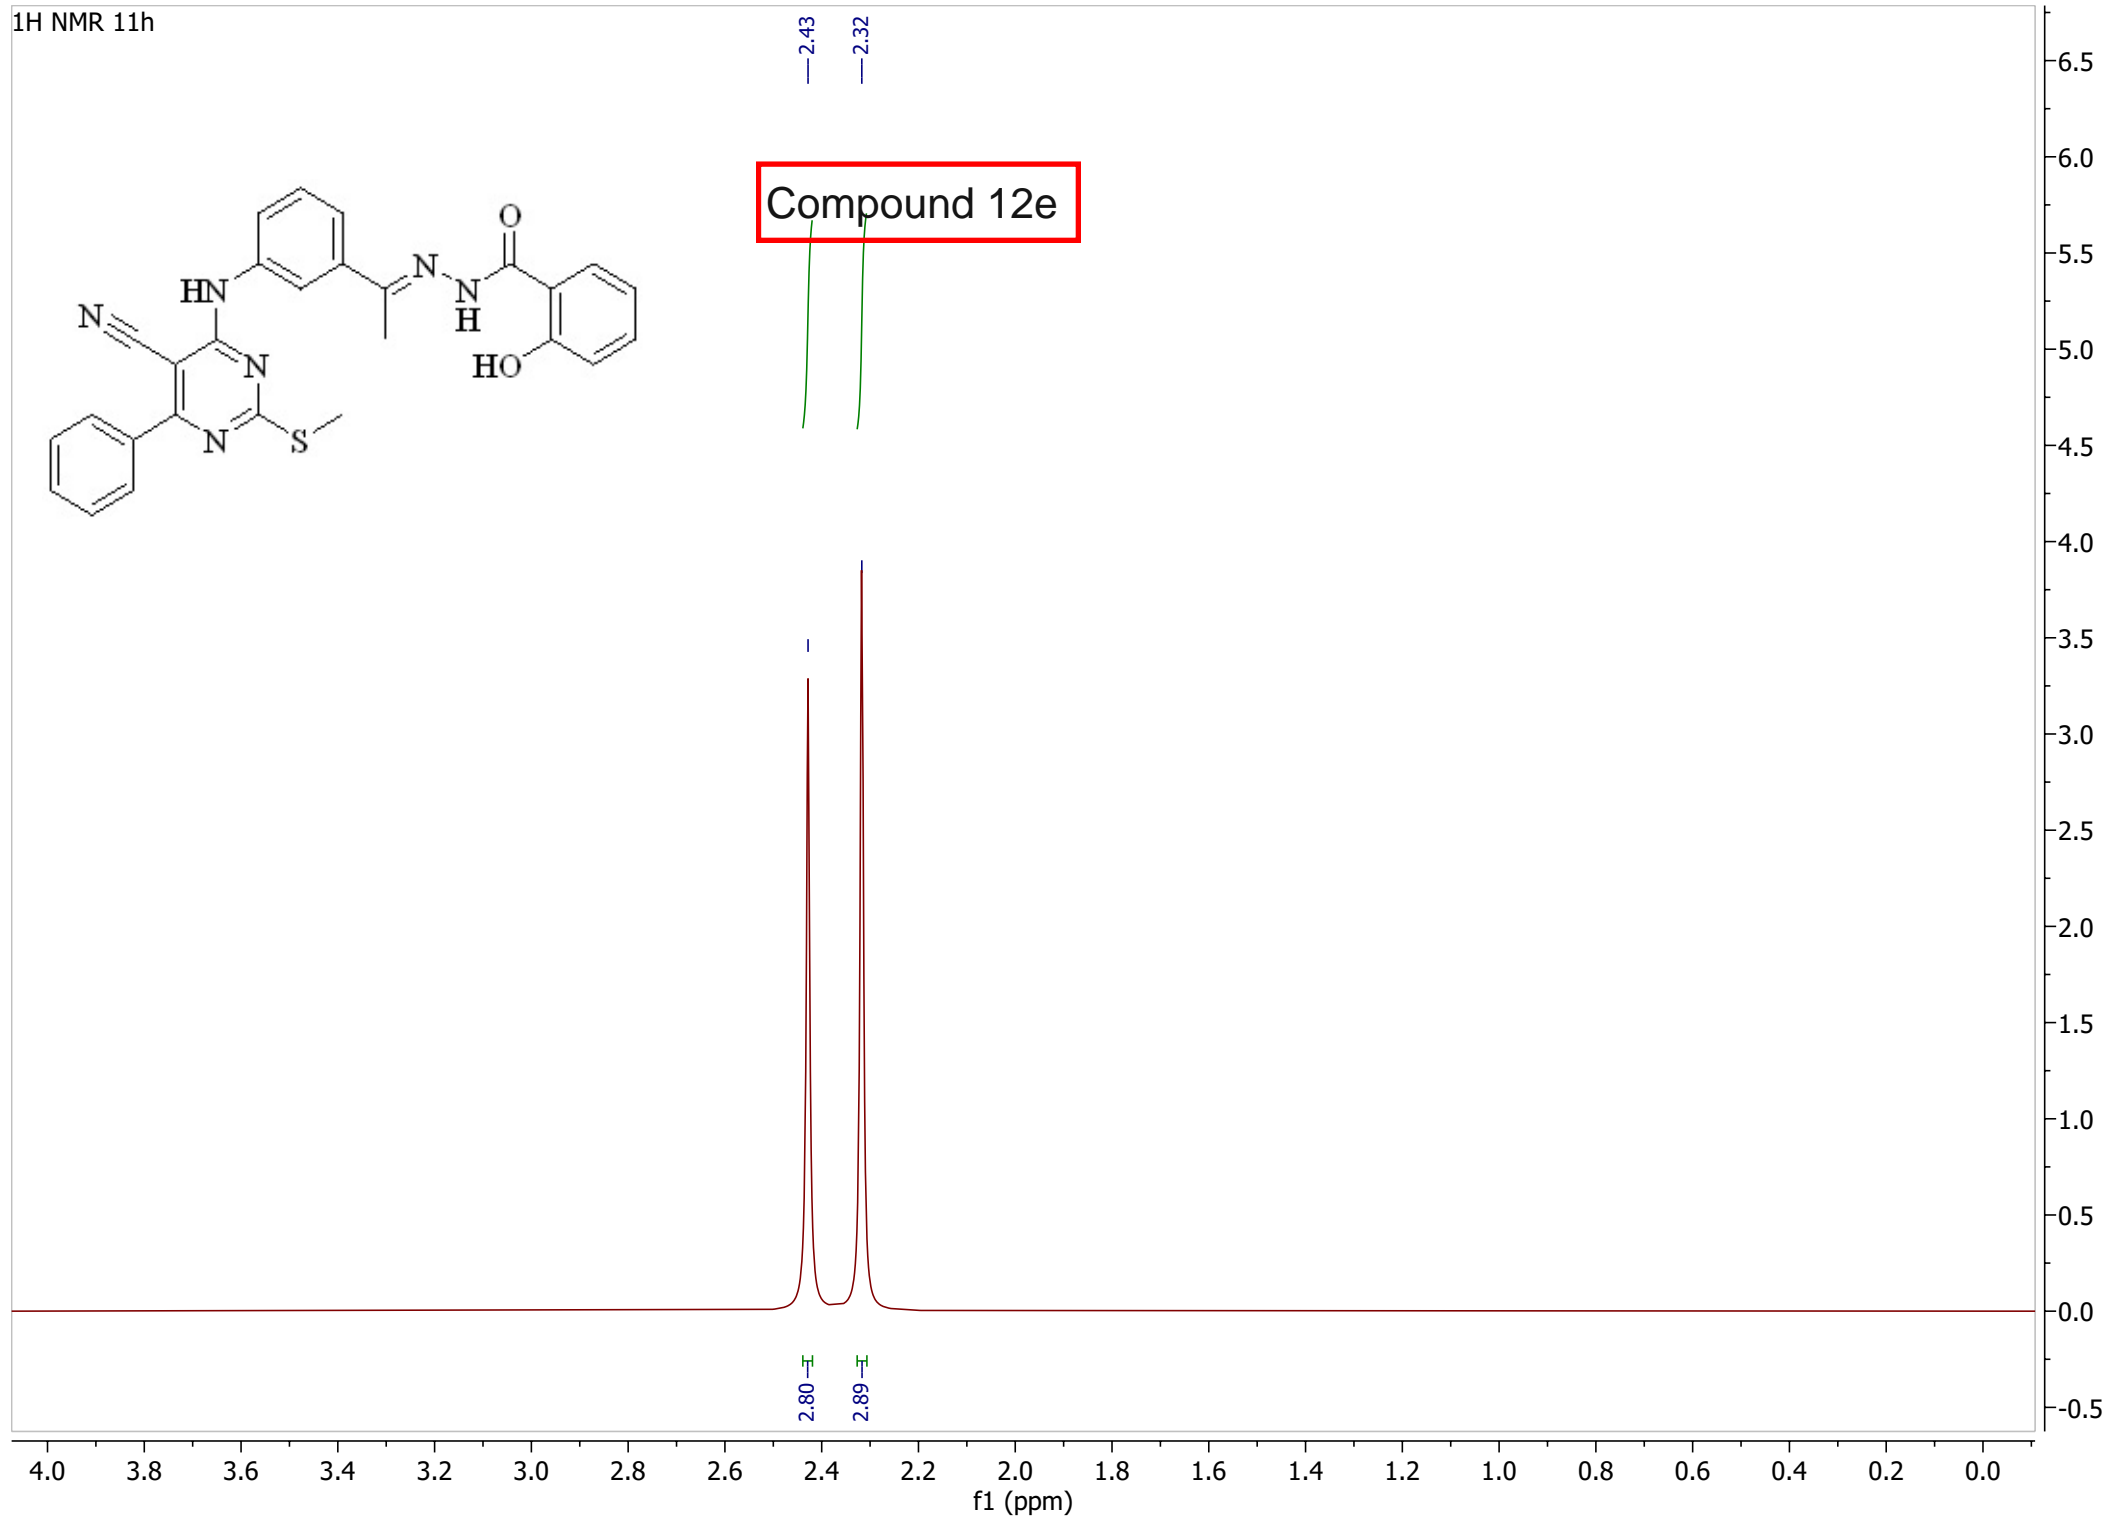

<sup>1</sup>H NMR 11h

8.14

7.97

7.96

7.85

7.83

7.66

7.64

7.62

7.61

7.59

7.58

7.58

7.55

7.54

7.53

7.43

7.42

7.40

7.39

7.37

7.00

6.99

6.96

6.94

6.93

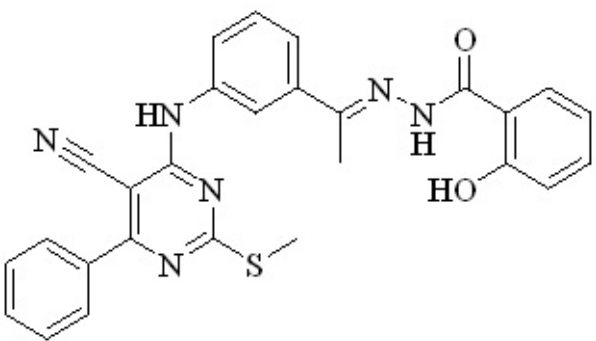

Compound 12e

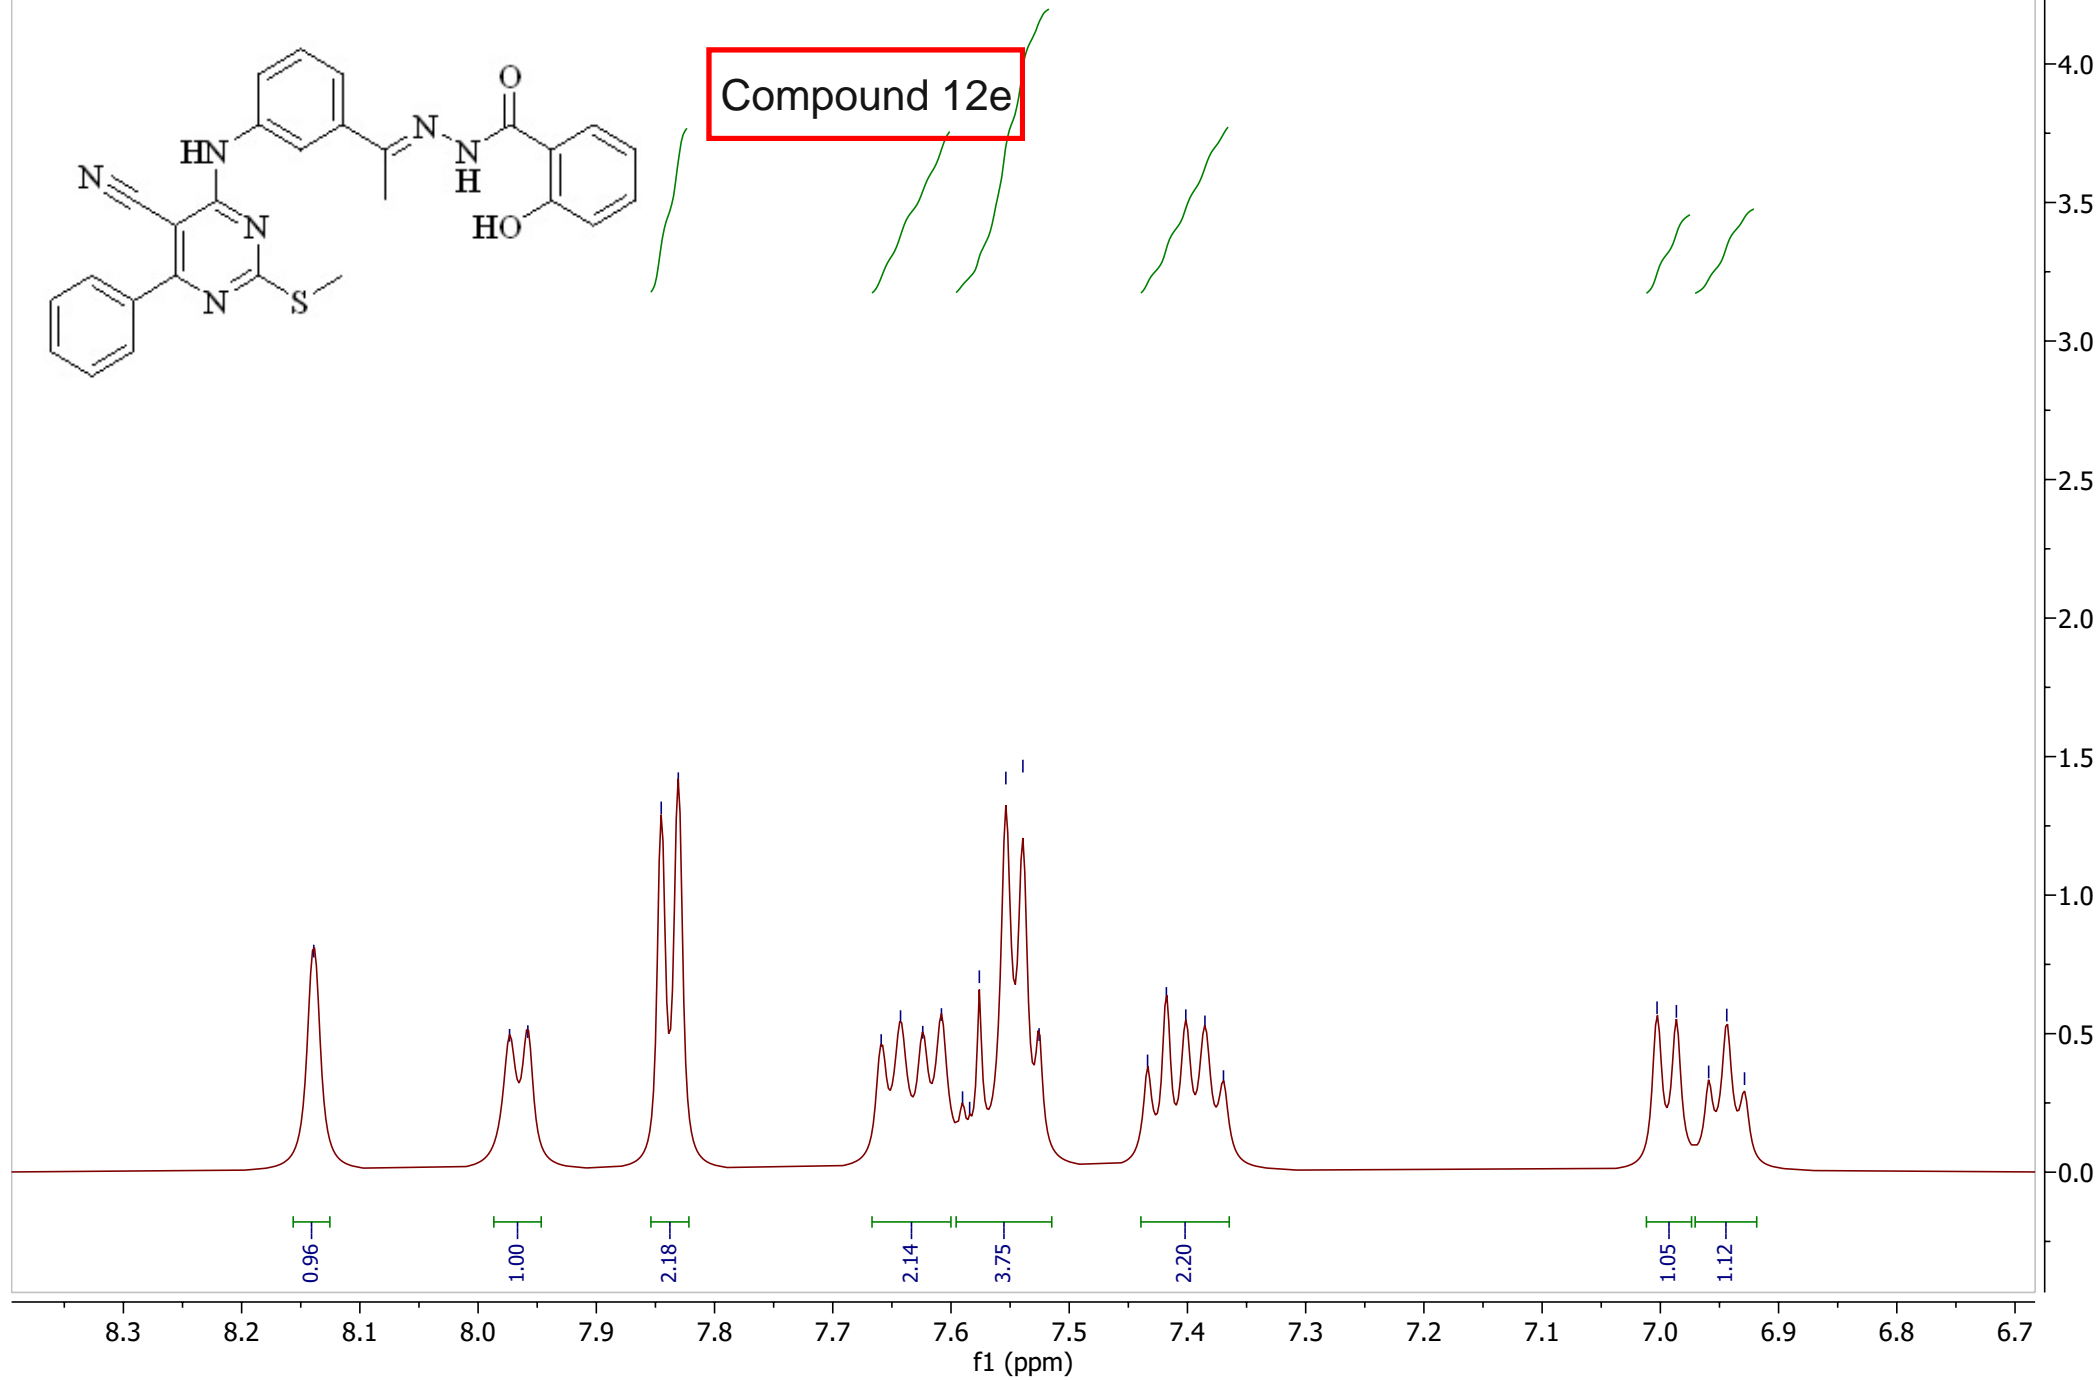

<sup>1</sup>H NMR 11h

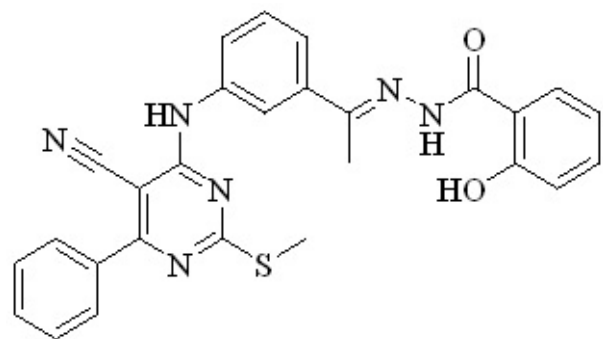

Compound 12e

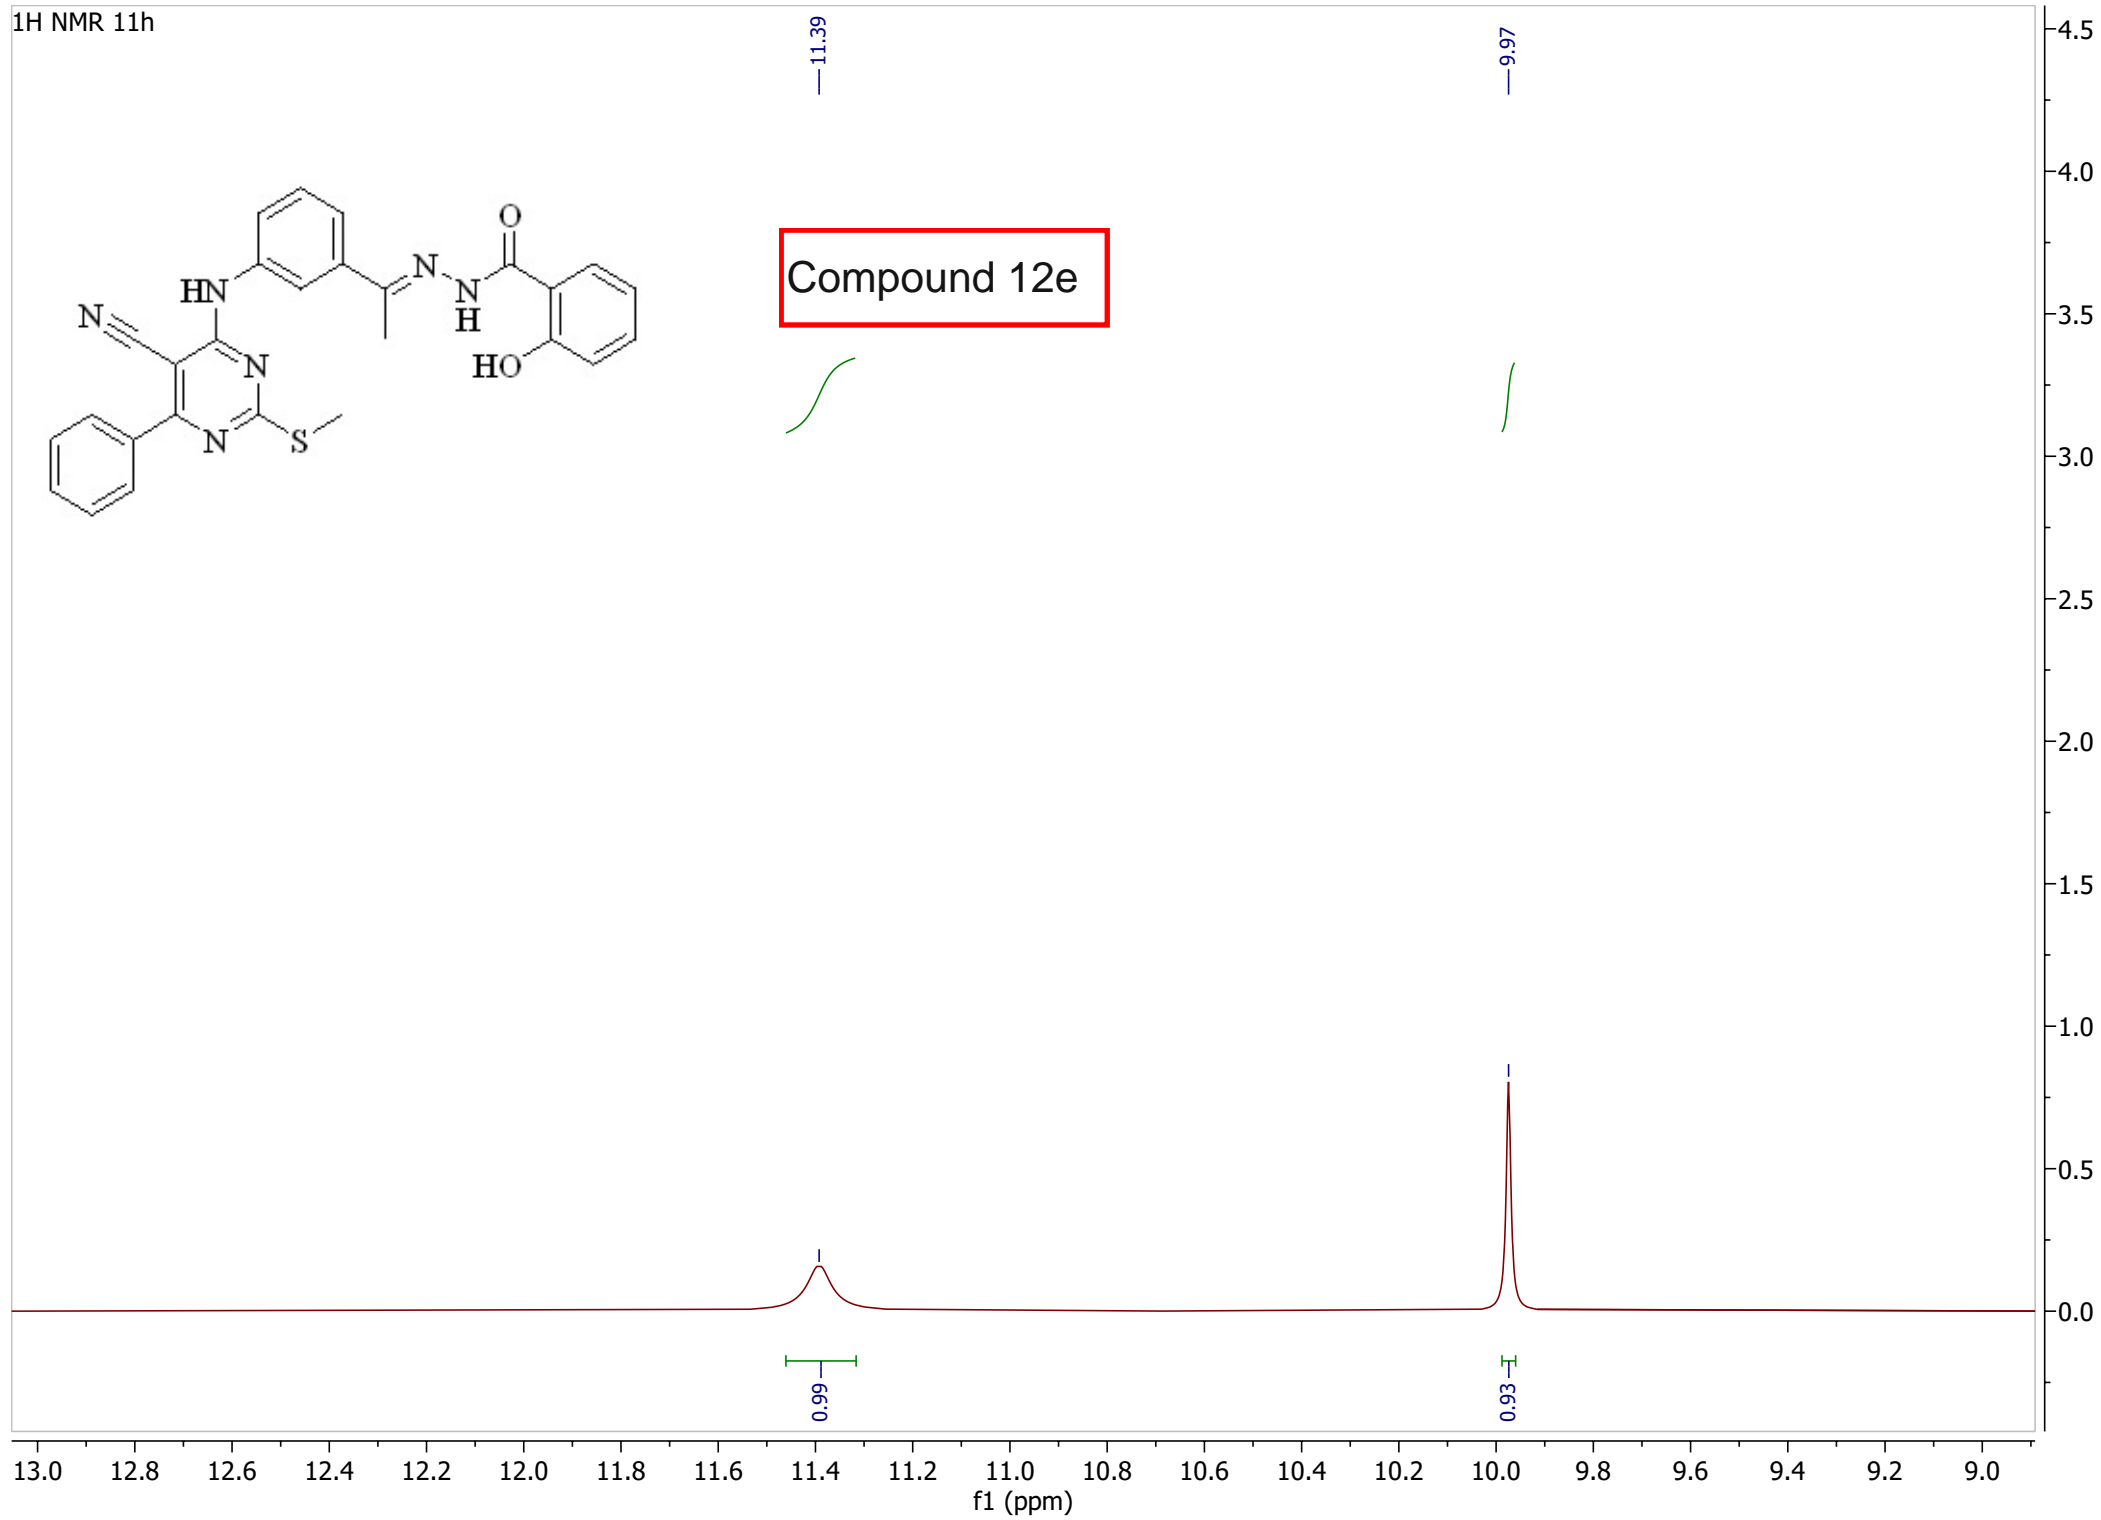

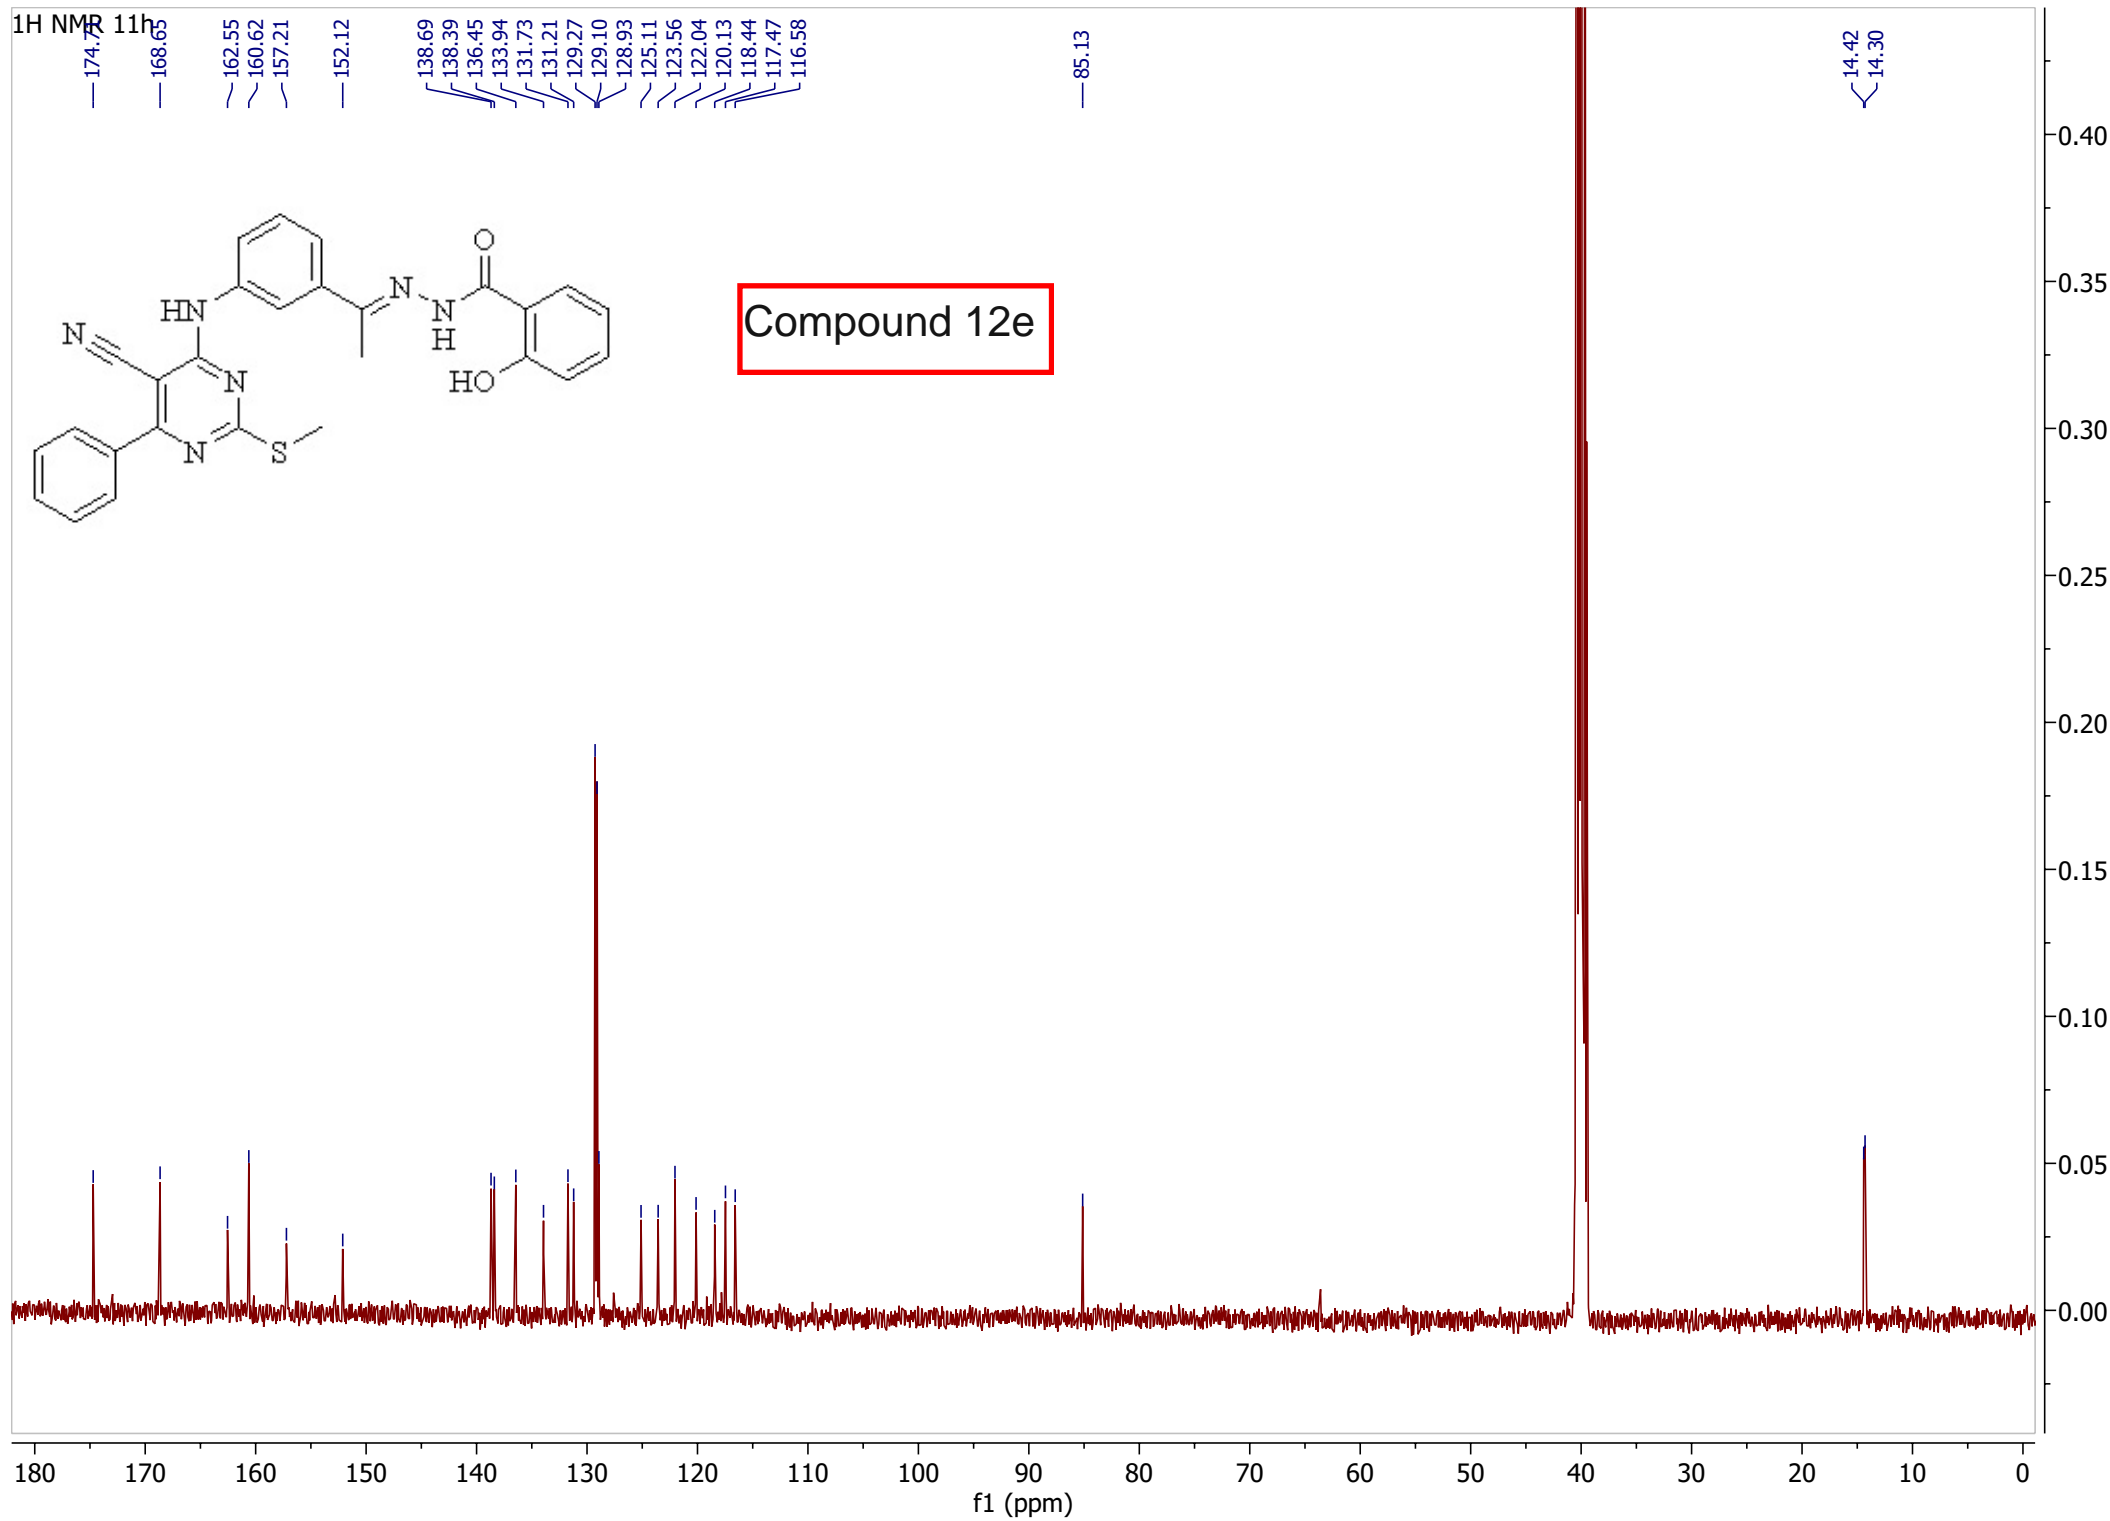

<sup>1</sup>H NMR 11h

85.13

14.42  
14.30

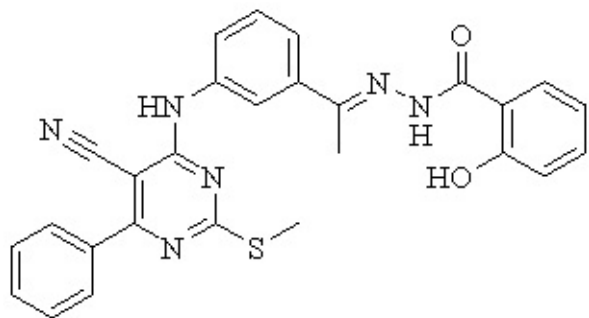

Compound 12e

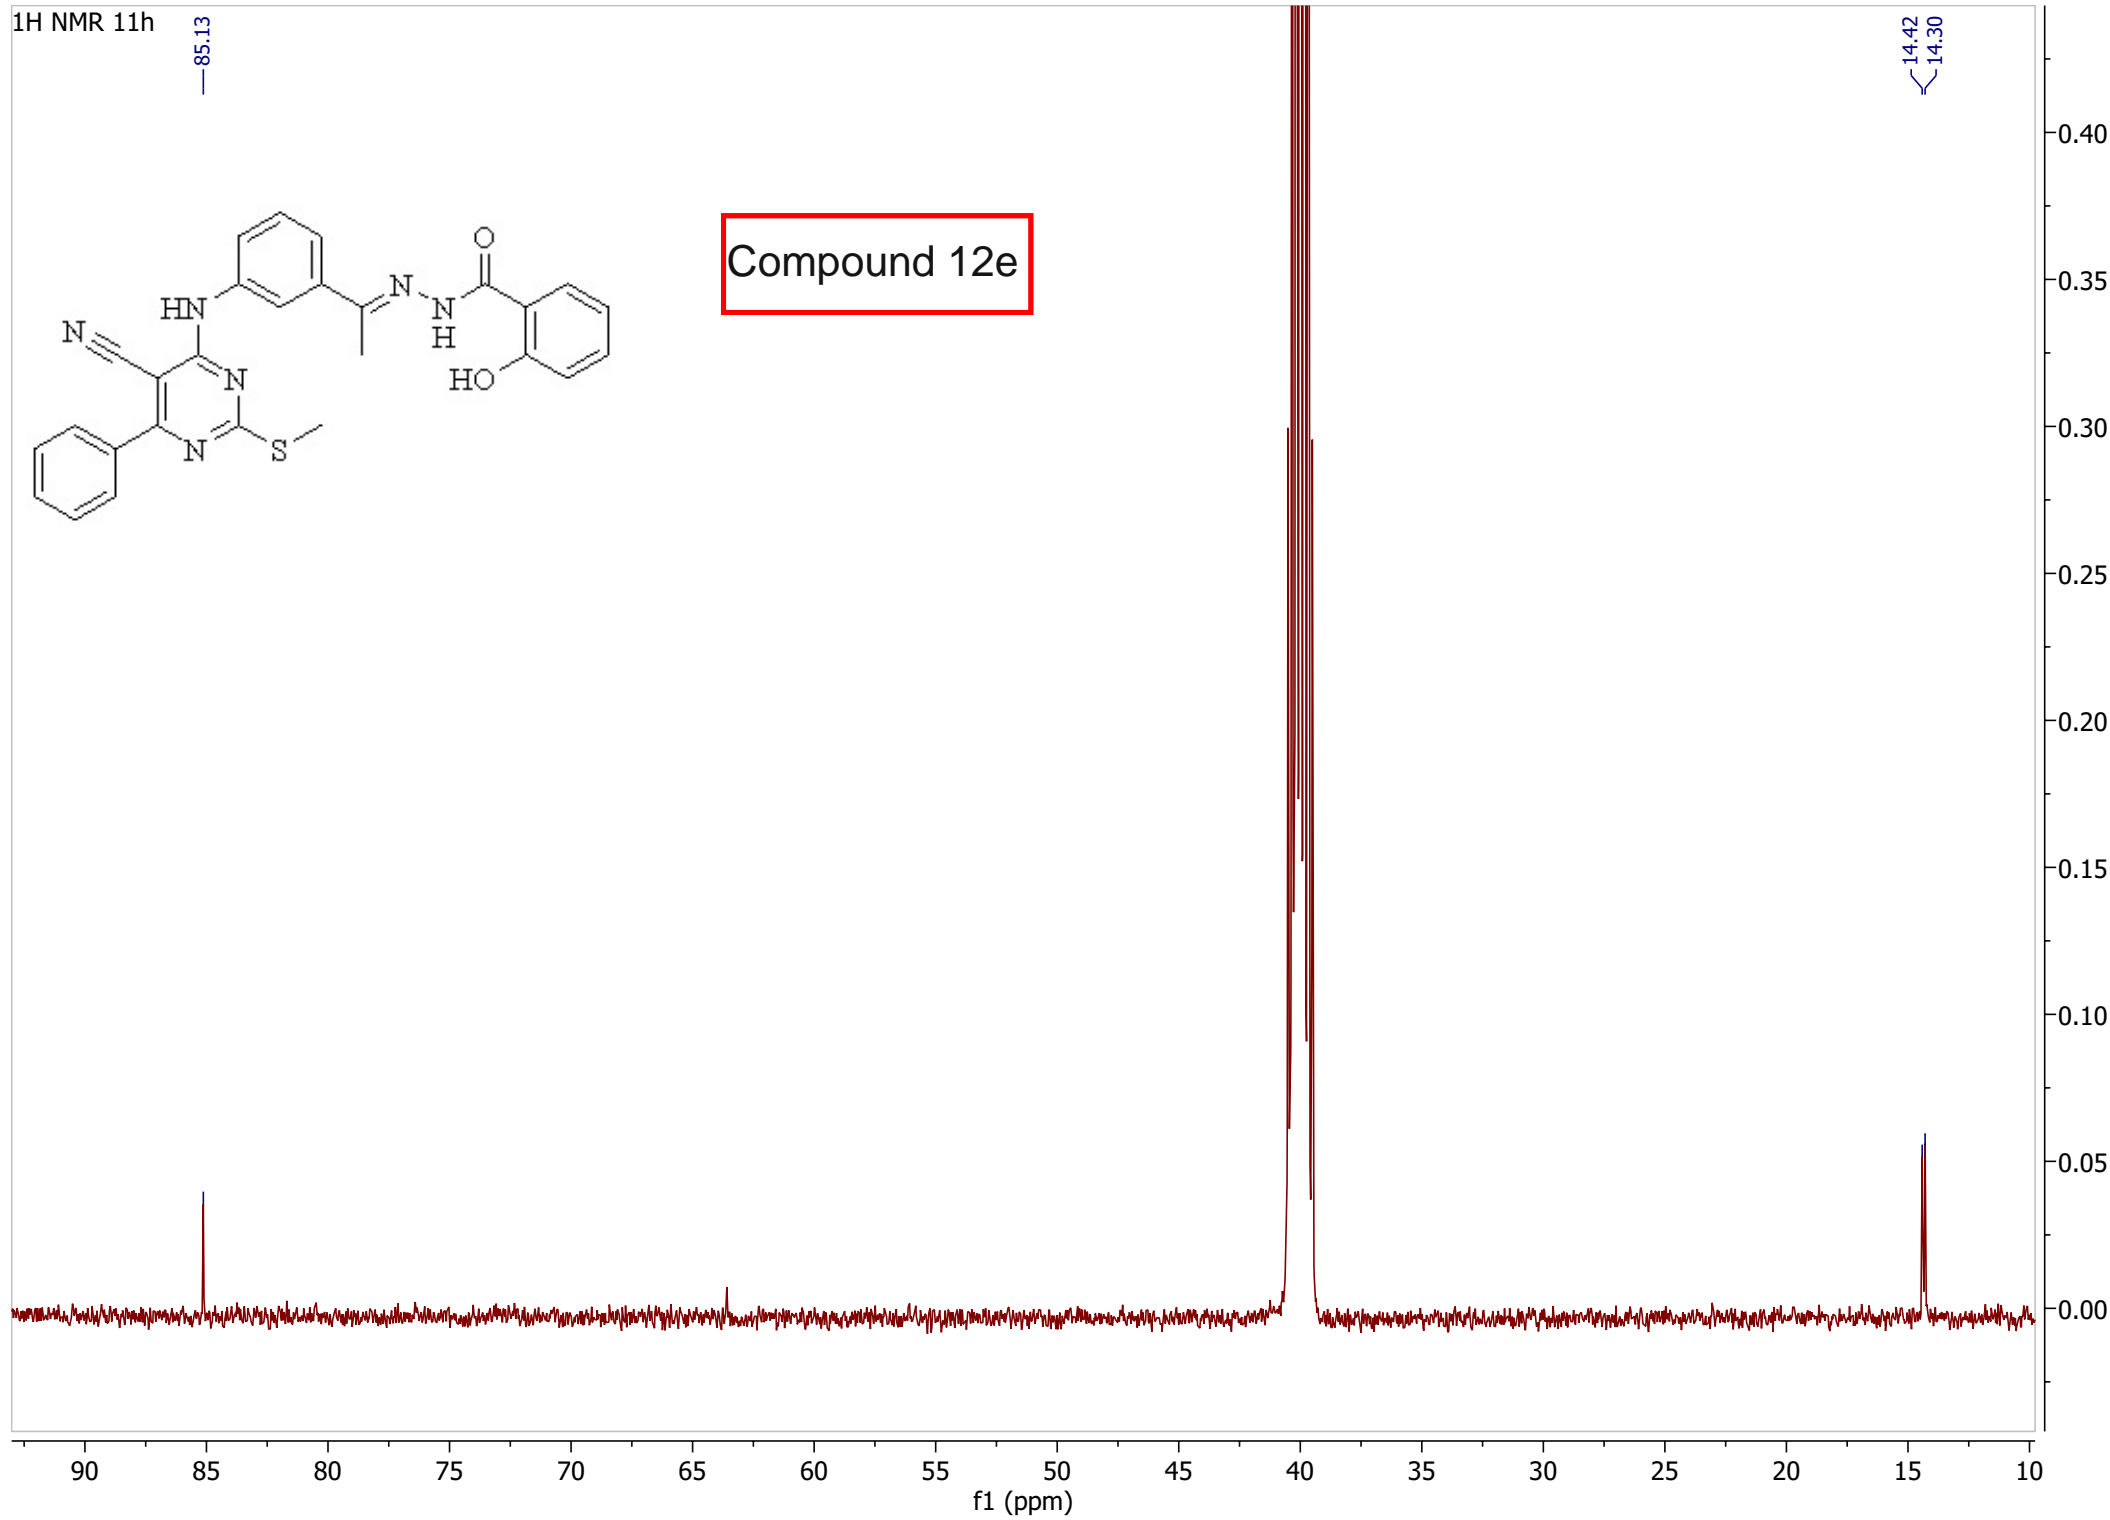

<sup>1</sup>H NMR 11h

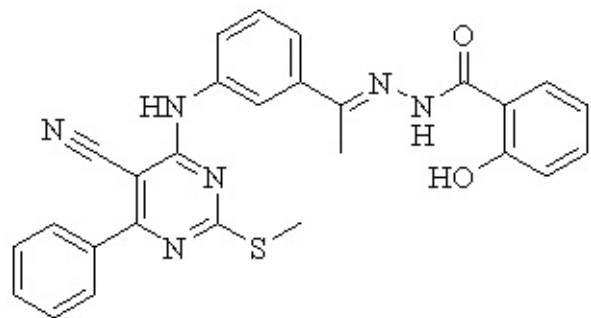

Compound 12e

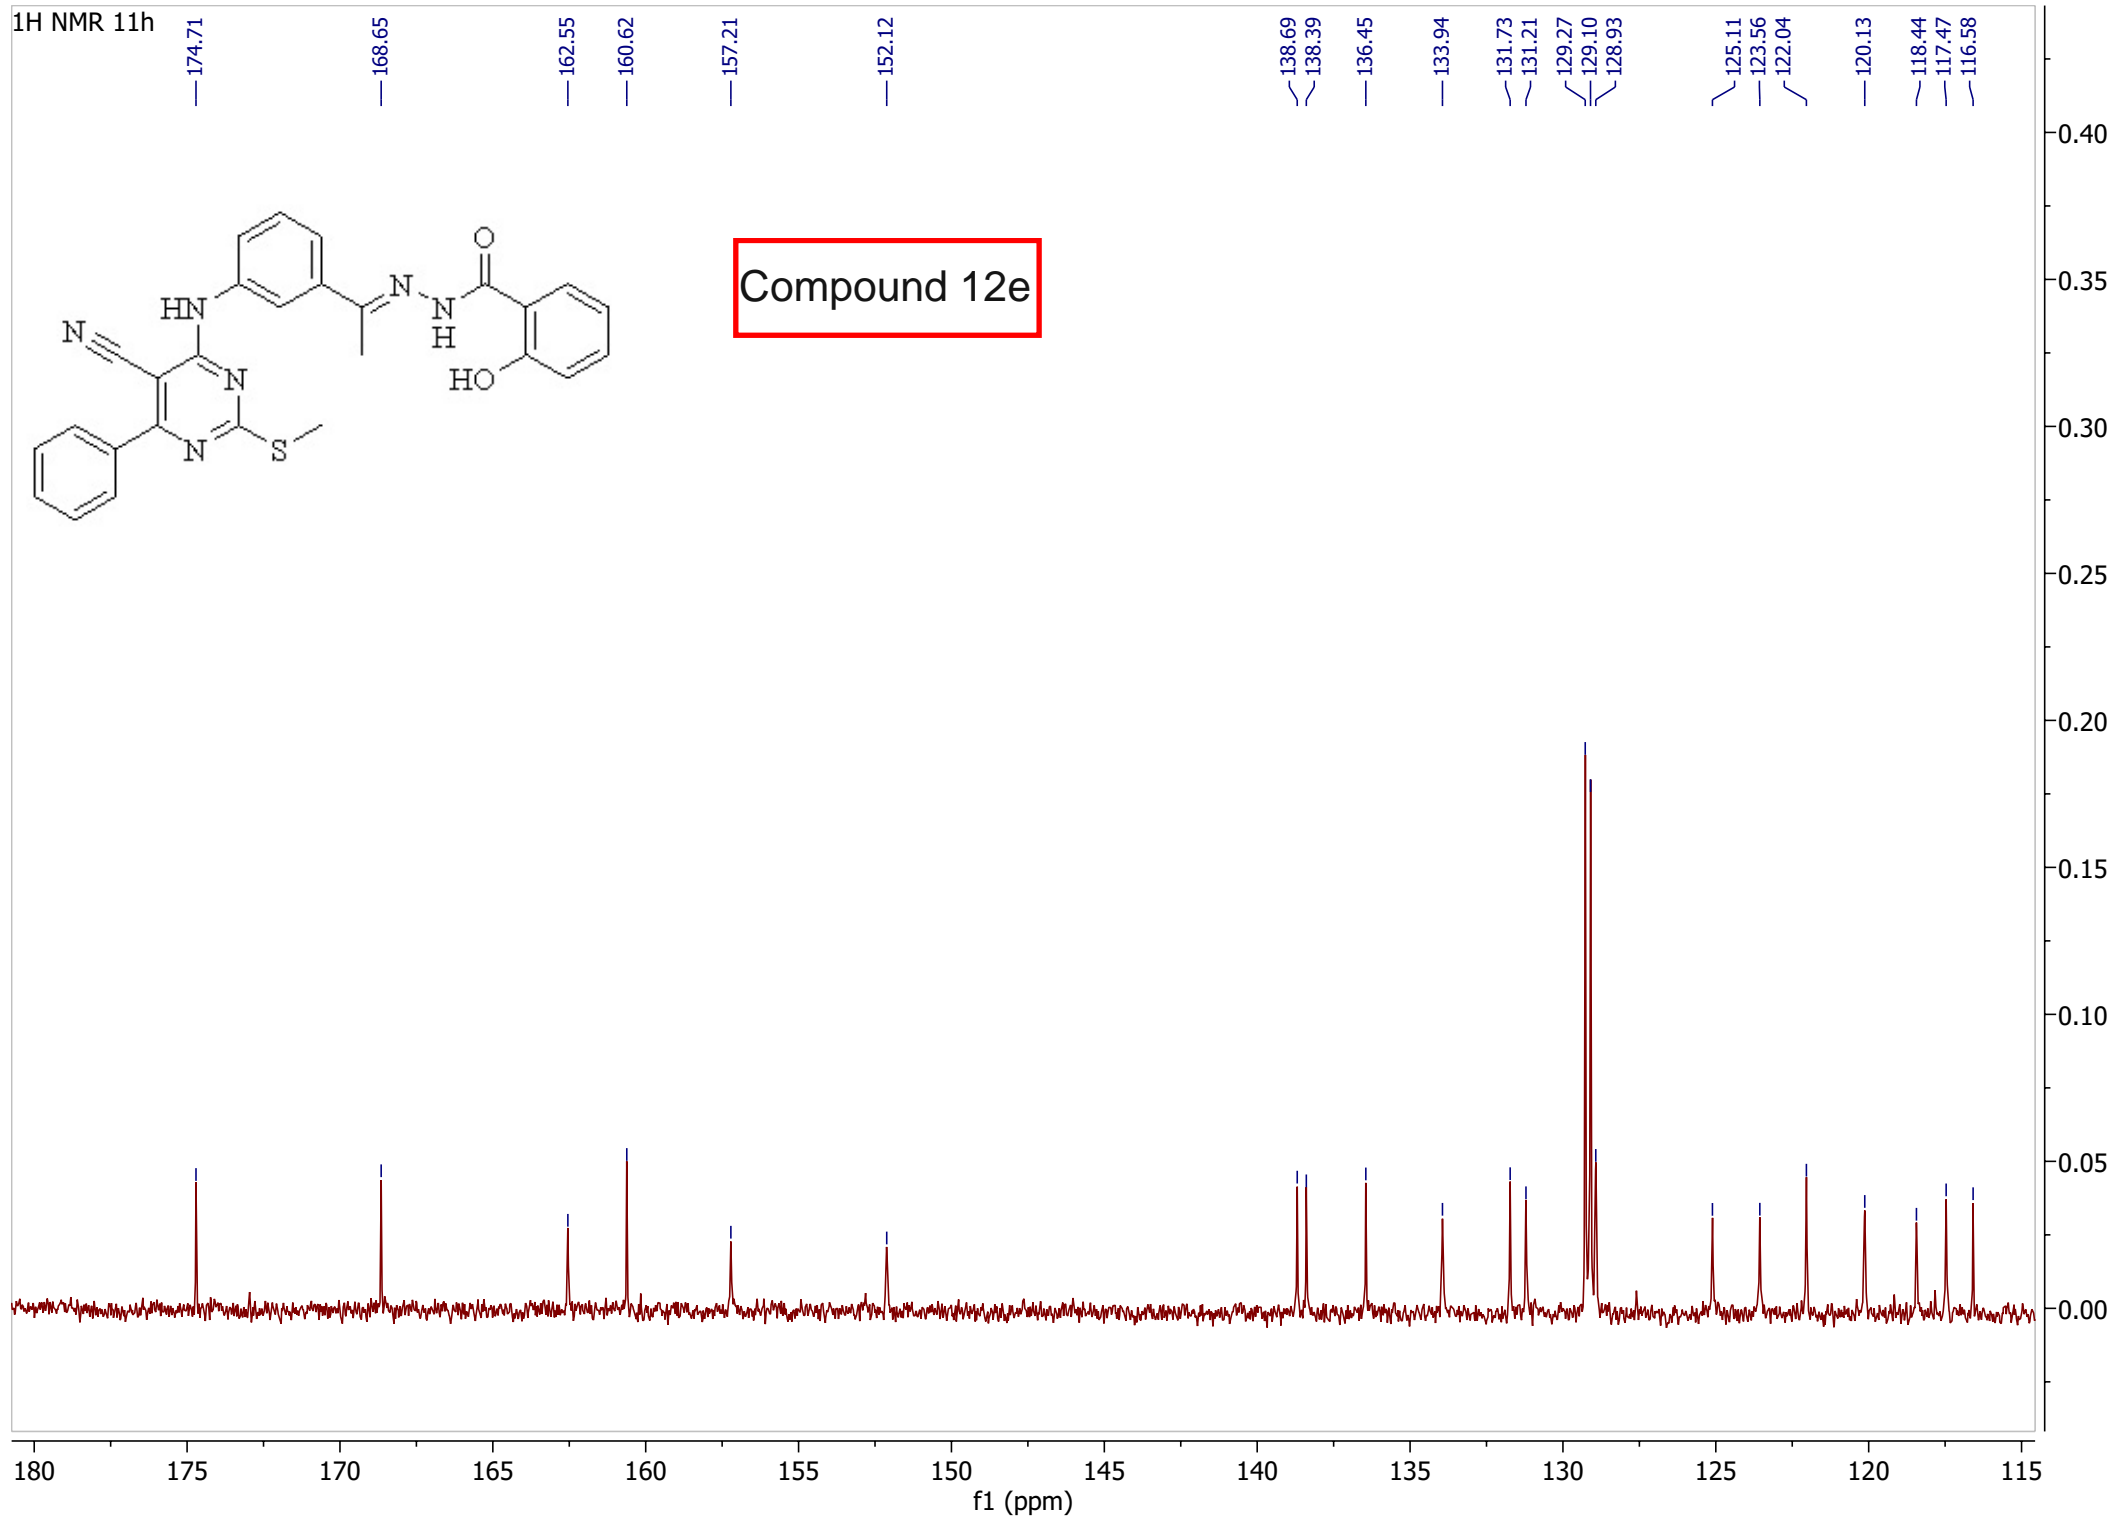

# SAMPLE INFORMATION

|                   |              |                     |                     |                                 |
|-------------------|--------------|---------------------|---------------------|---------------------------------|
| Sample Name:      | ASZM4        | <b>Compound 12f</b> | Acquired By:        | System                          |
| Sample Type:      | Unknown      |                     | Sample Set Name:    | 1                               |
| Vial:             | 19           |                     | Acq. Method Set:    | Organic1                        |
| Injection #:      | 1            |                     | Processing Method:  | Default                         |
| Injection Volume: | 2.00 ul      |                     | Channel Name:       | 286.0nm                         |
| Run Time:         | 10.0 Minutes |                     | Proc. Chnl. Descr.: | W2996 FDA 286.0 nm(FDA 190.0 to |

Date Acquired: 11/6/2022 7:47:03 AMEET  
 Date Processed: 11/6/2022 10:26:57 AMEET

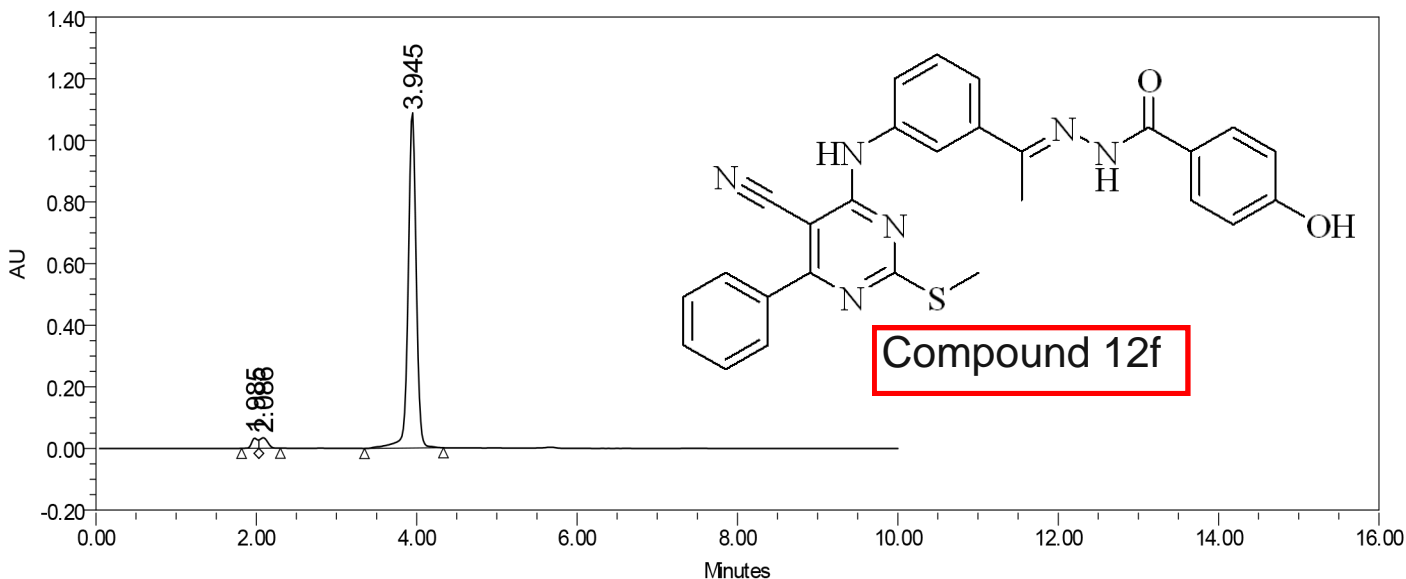

|   | RT    | Area    | % Area | Height  |
|---|-------|---------|--------|---------|
| 1 | 1.985 | 179325  | 2.24   | 32588   |
| 2 | 2.086 | 230882  | 2.88   | 33692   |
| 3 | 3.945 | 7599646 | 94.88  | 1088143 |

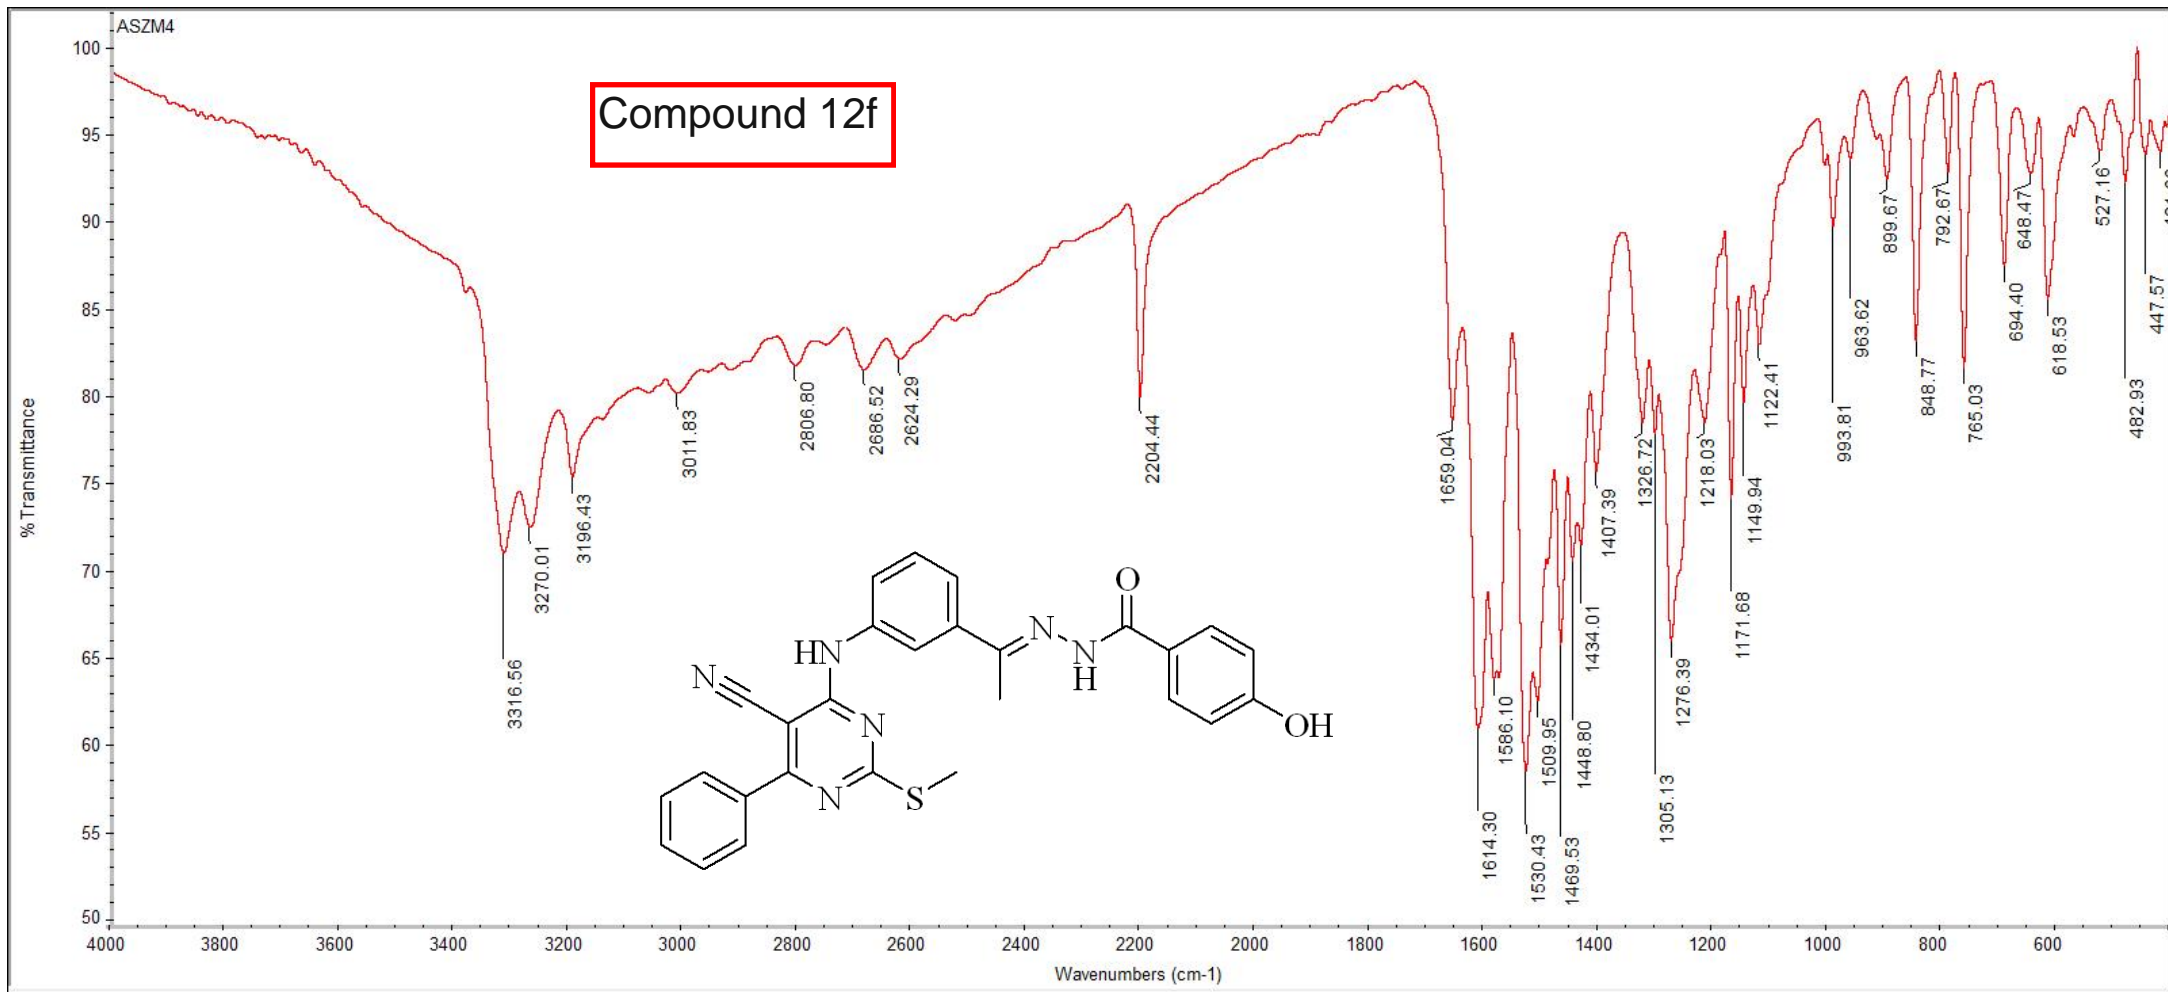



<sup>1</sup>H NMR 11h

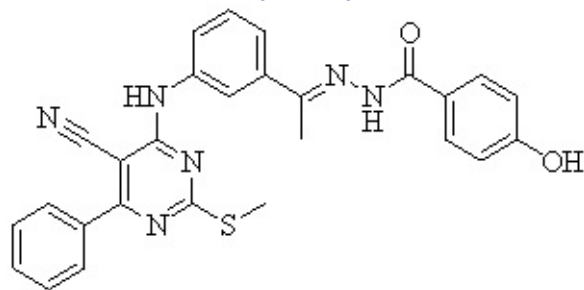

Compound 12f

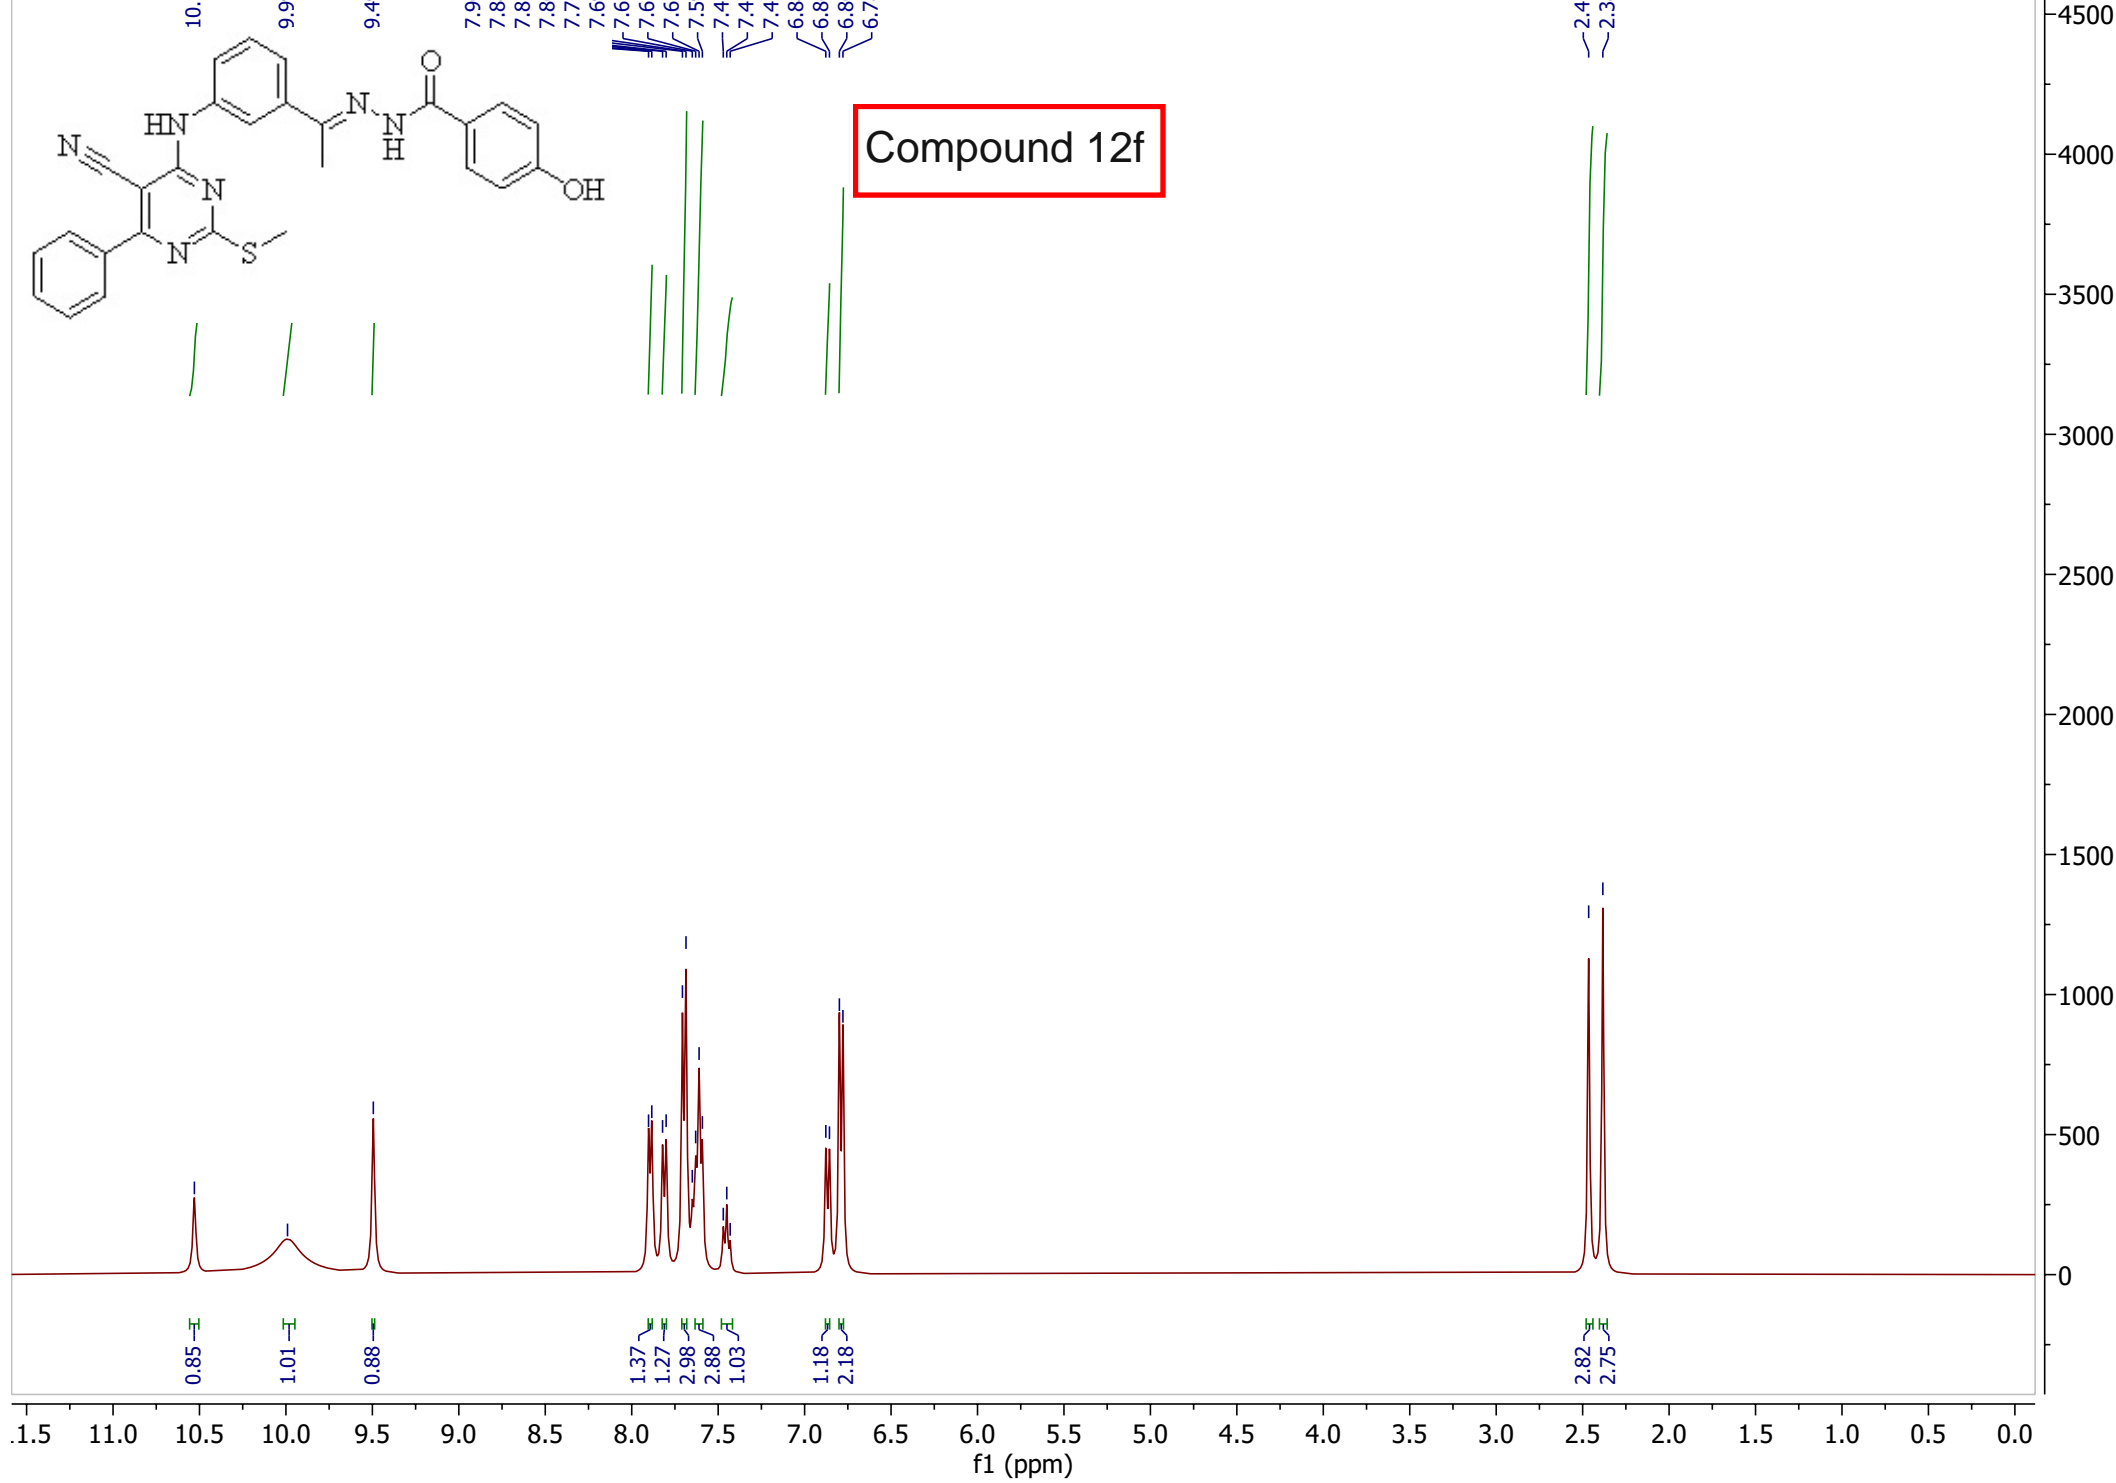

<sup>1</sup>H NMR 11h

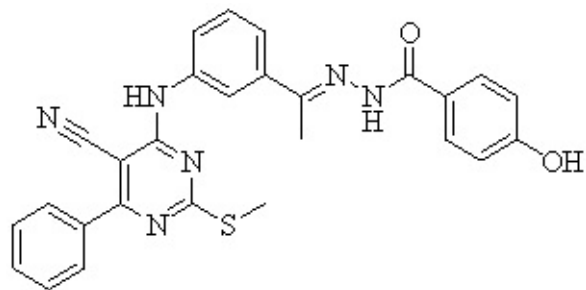

Compound 12f

—2.47

—2.38

2.82

2.75

5.0 4.8 4.6 4.4 4.2 4.0 3.8 3.6 3.4 3.2 3.0 2.8 2.6 2.4 2.2 2.0 1.8 1.6 1.4 1.2 1.0 0.8 0.6 0.4 0.2 0.0

f1 (ppm)

4500  
4000  
3500  
3000  
2500  
2000  
1500  
1000  
500  
0

<sup>1</sup>H NMR 11h

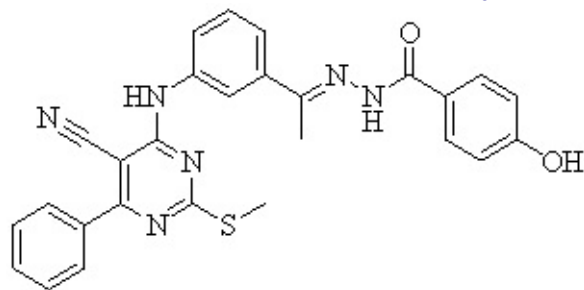

Compound 12f

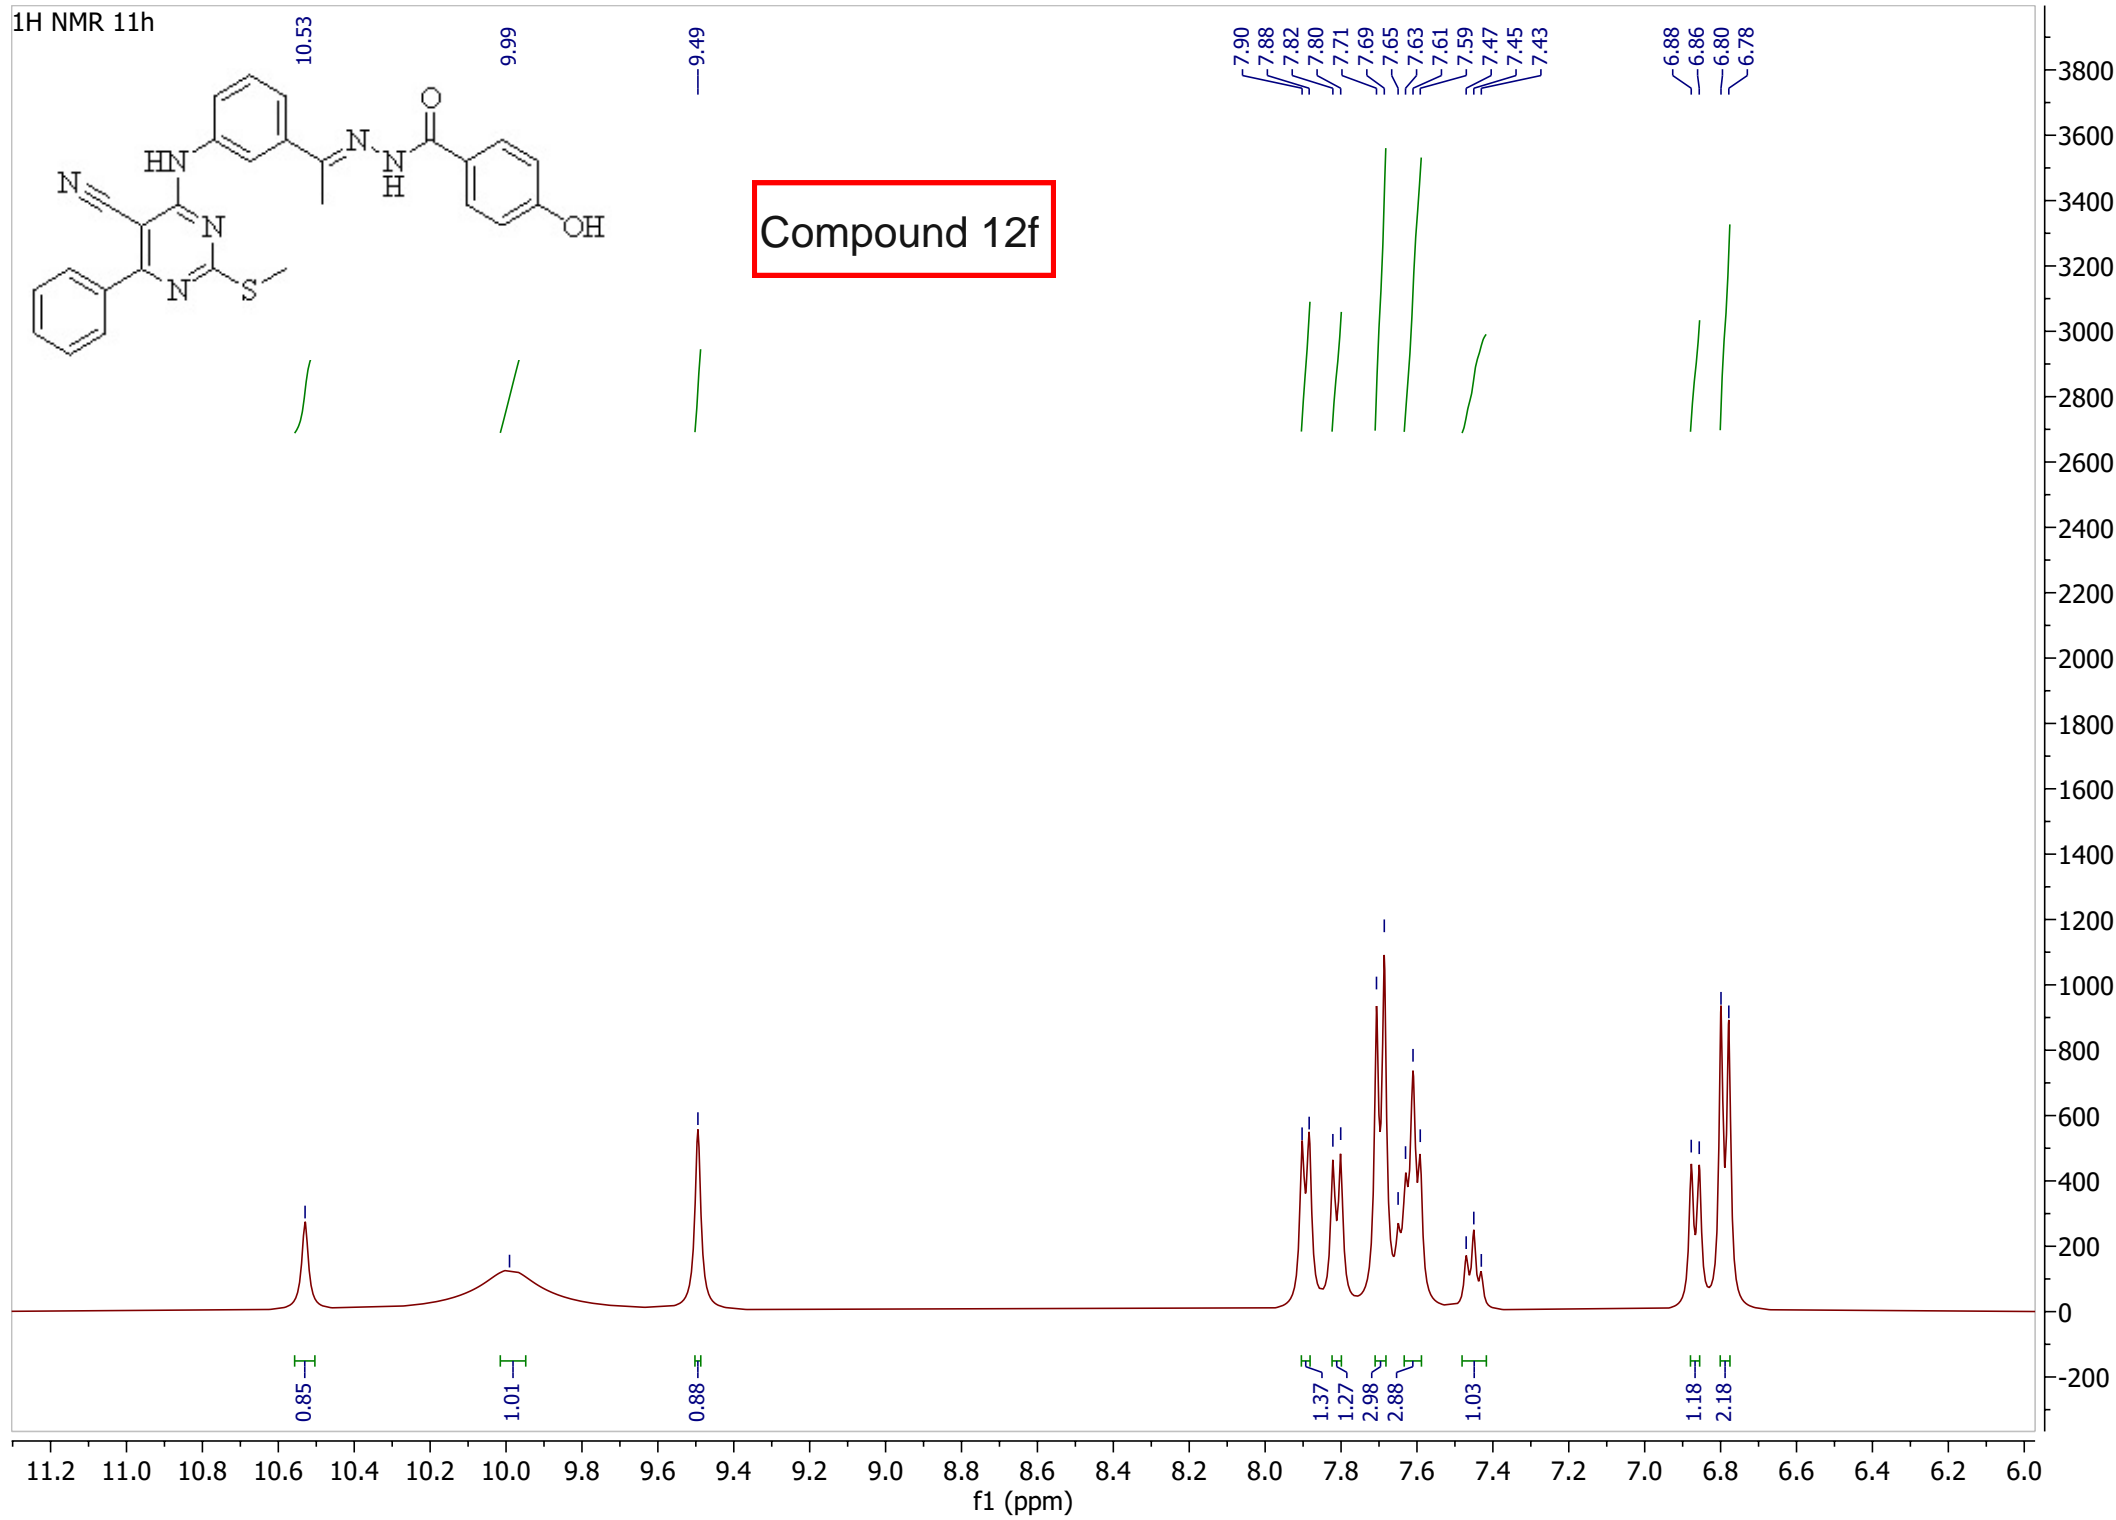

<sup>13</sup>C NMR 12f

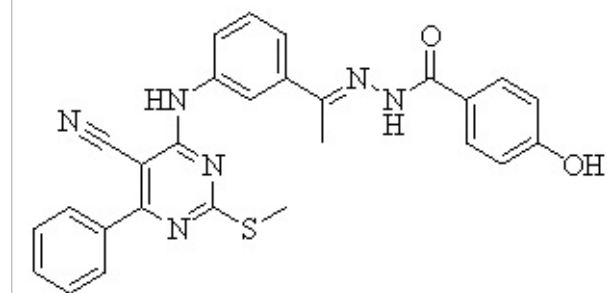

Compound 12f

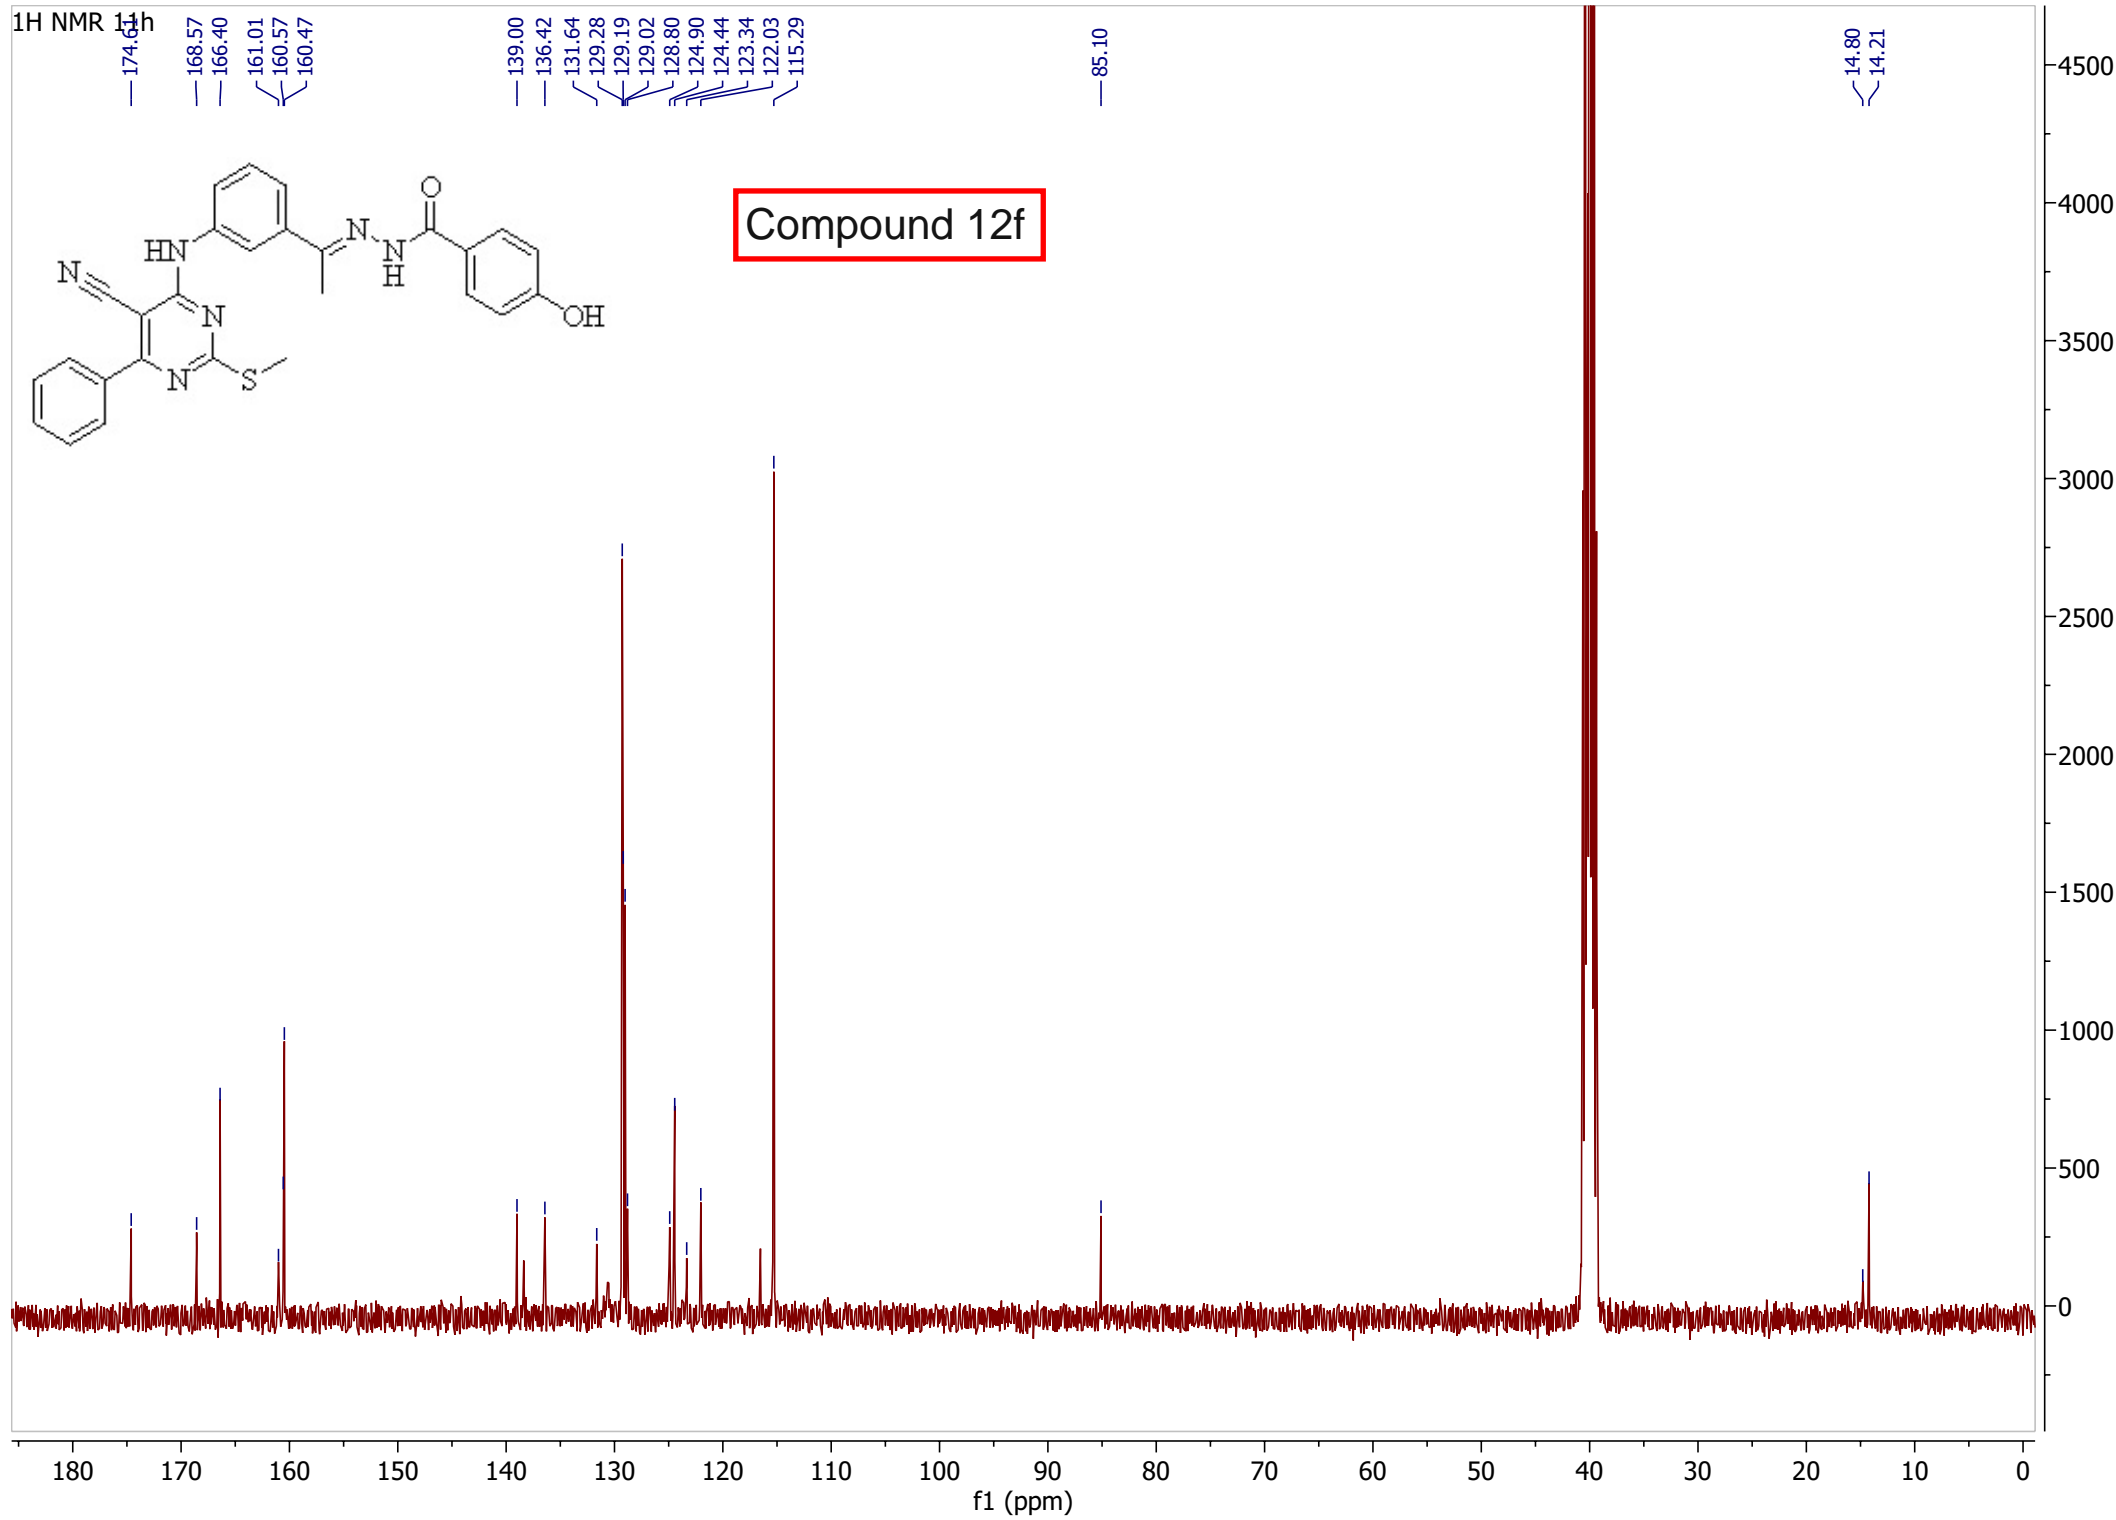

<sup>1</sup>H NMR 11h

85.10

14.80  
14.21

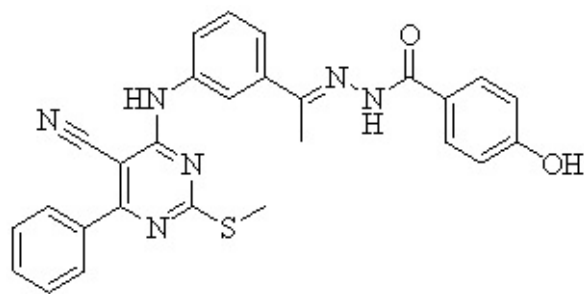

Compound 12f

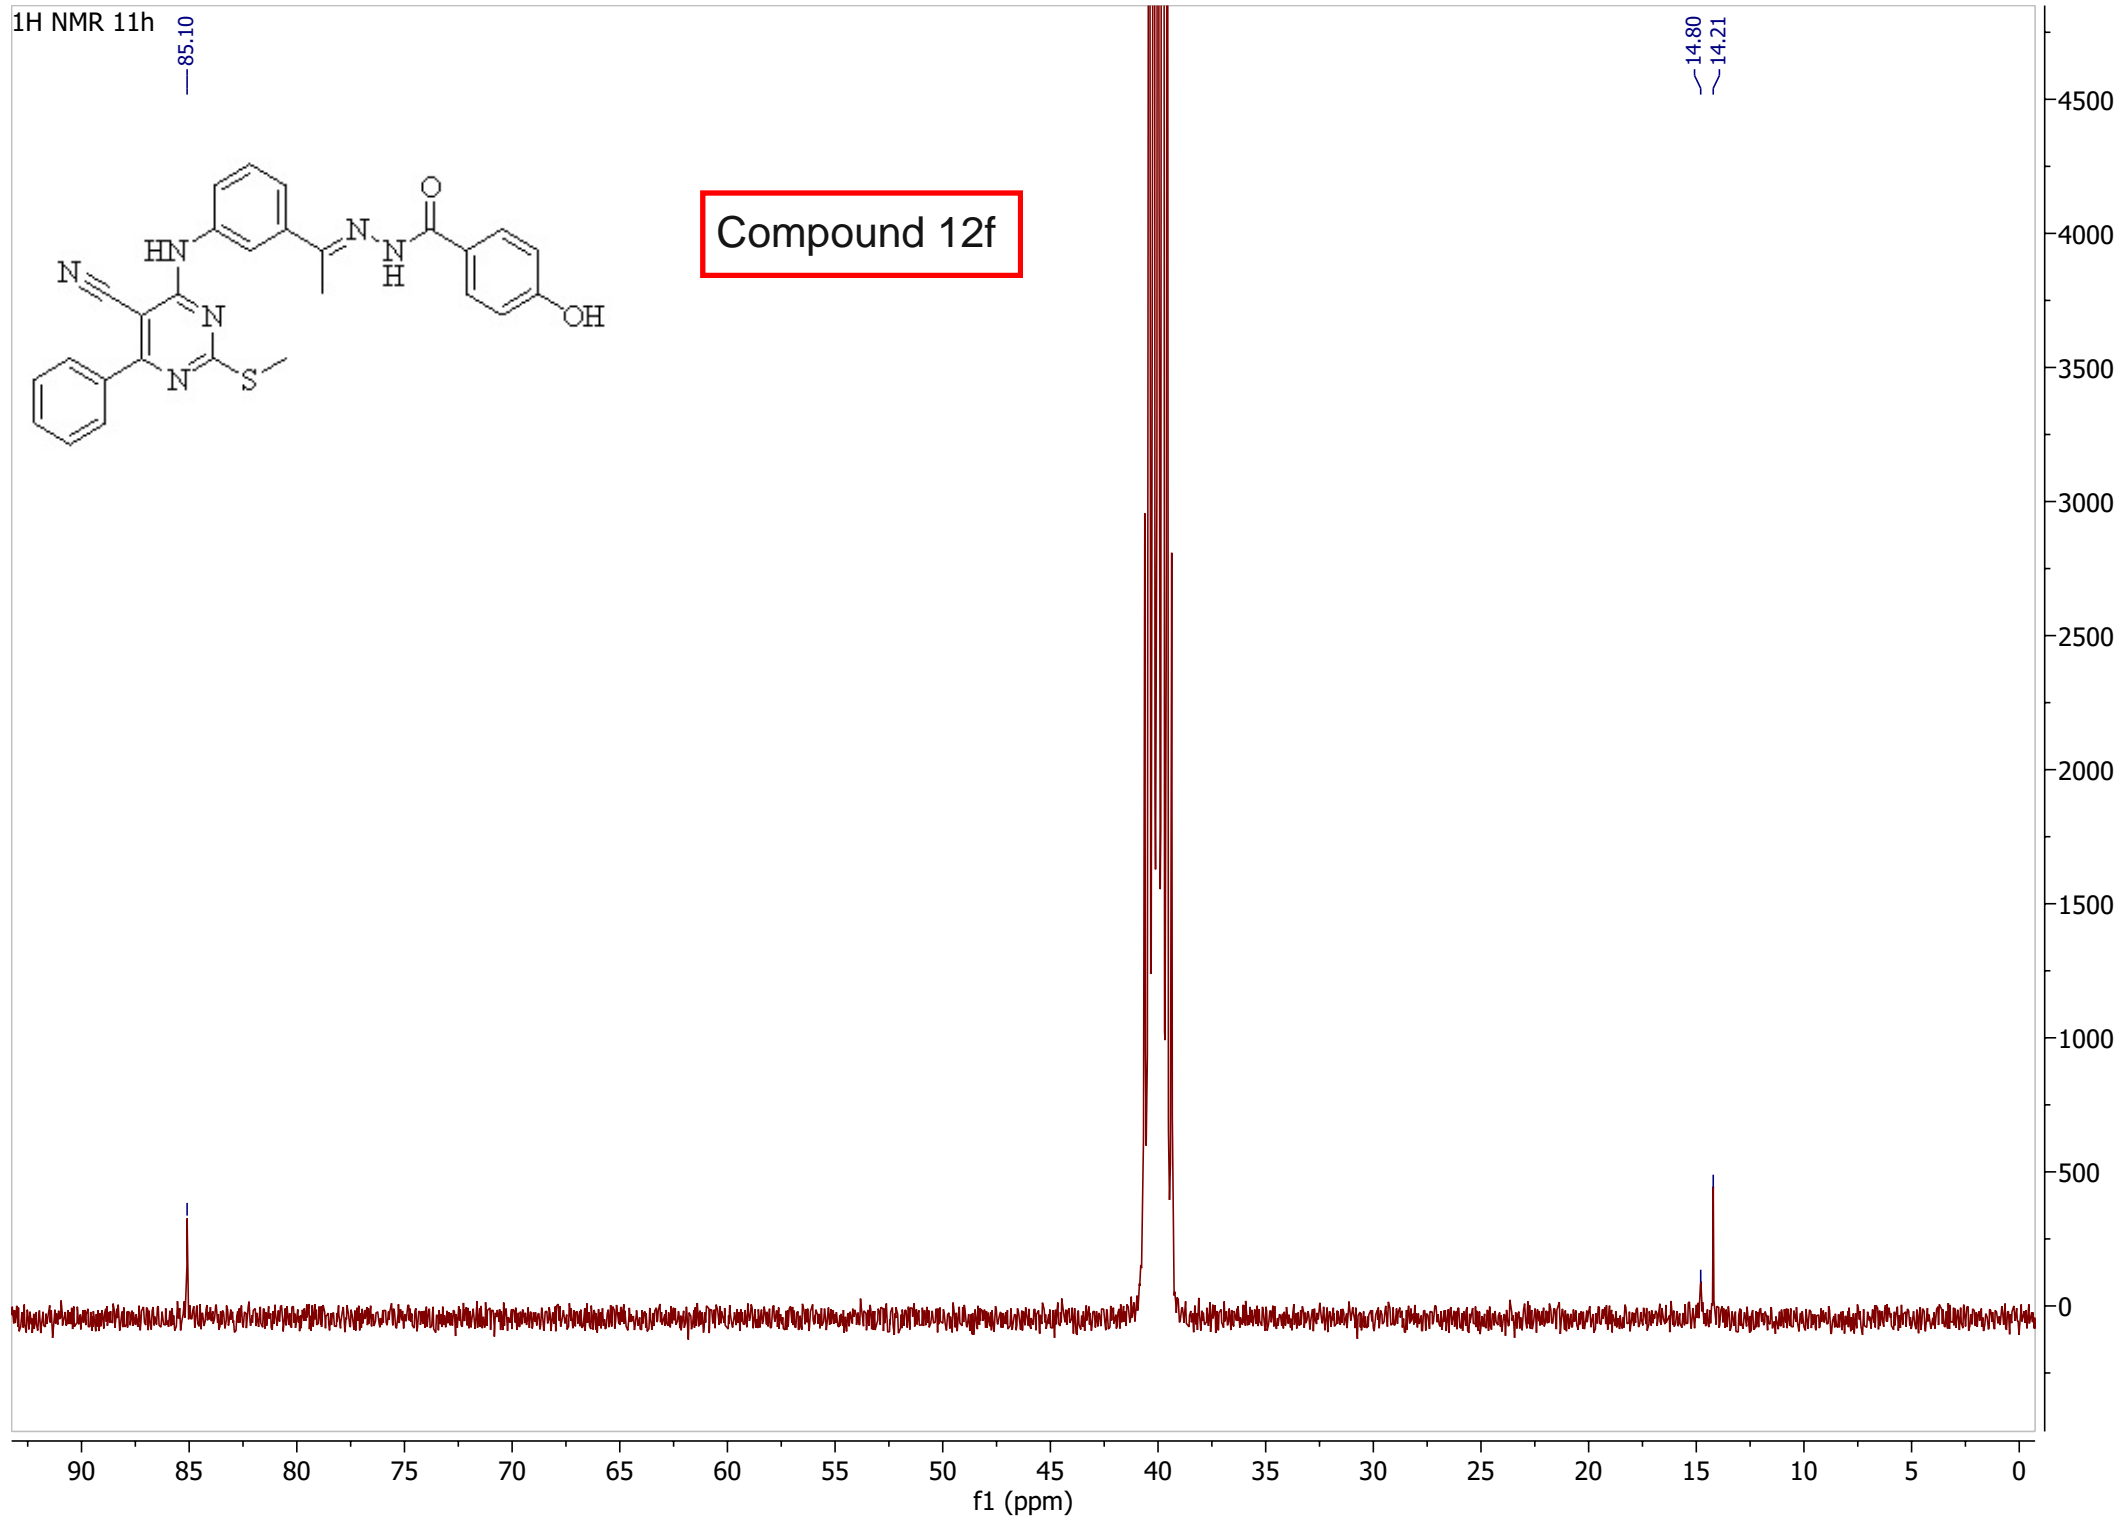

<sup>1</sup>H NMR 11h

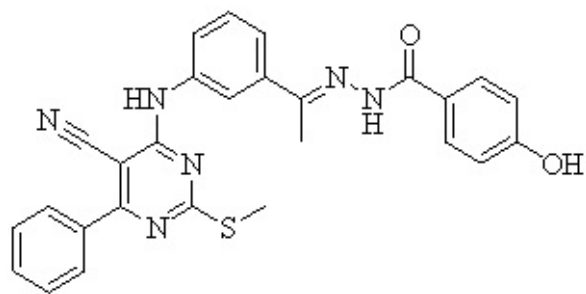

Compound 12f

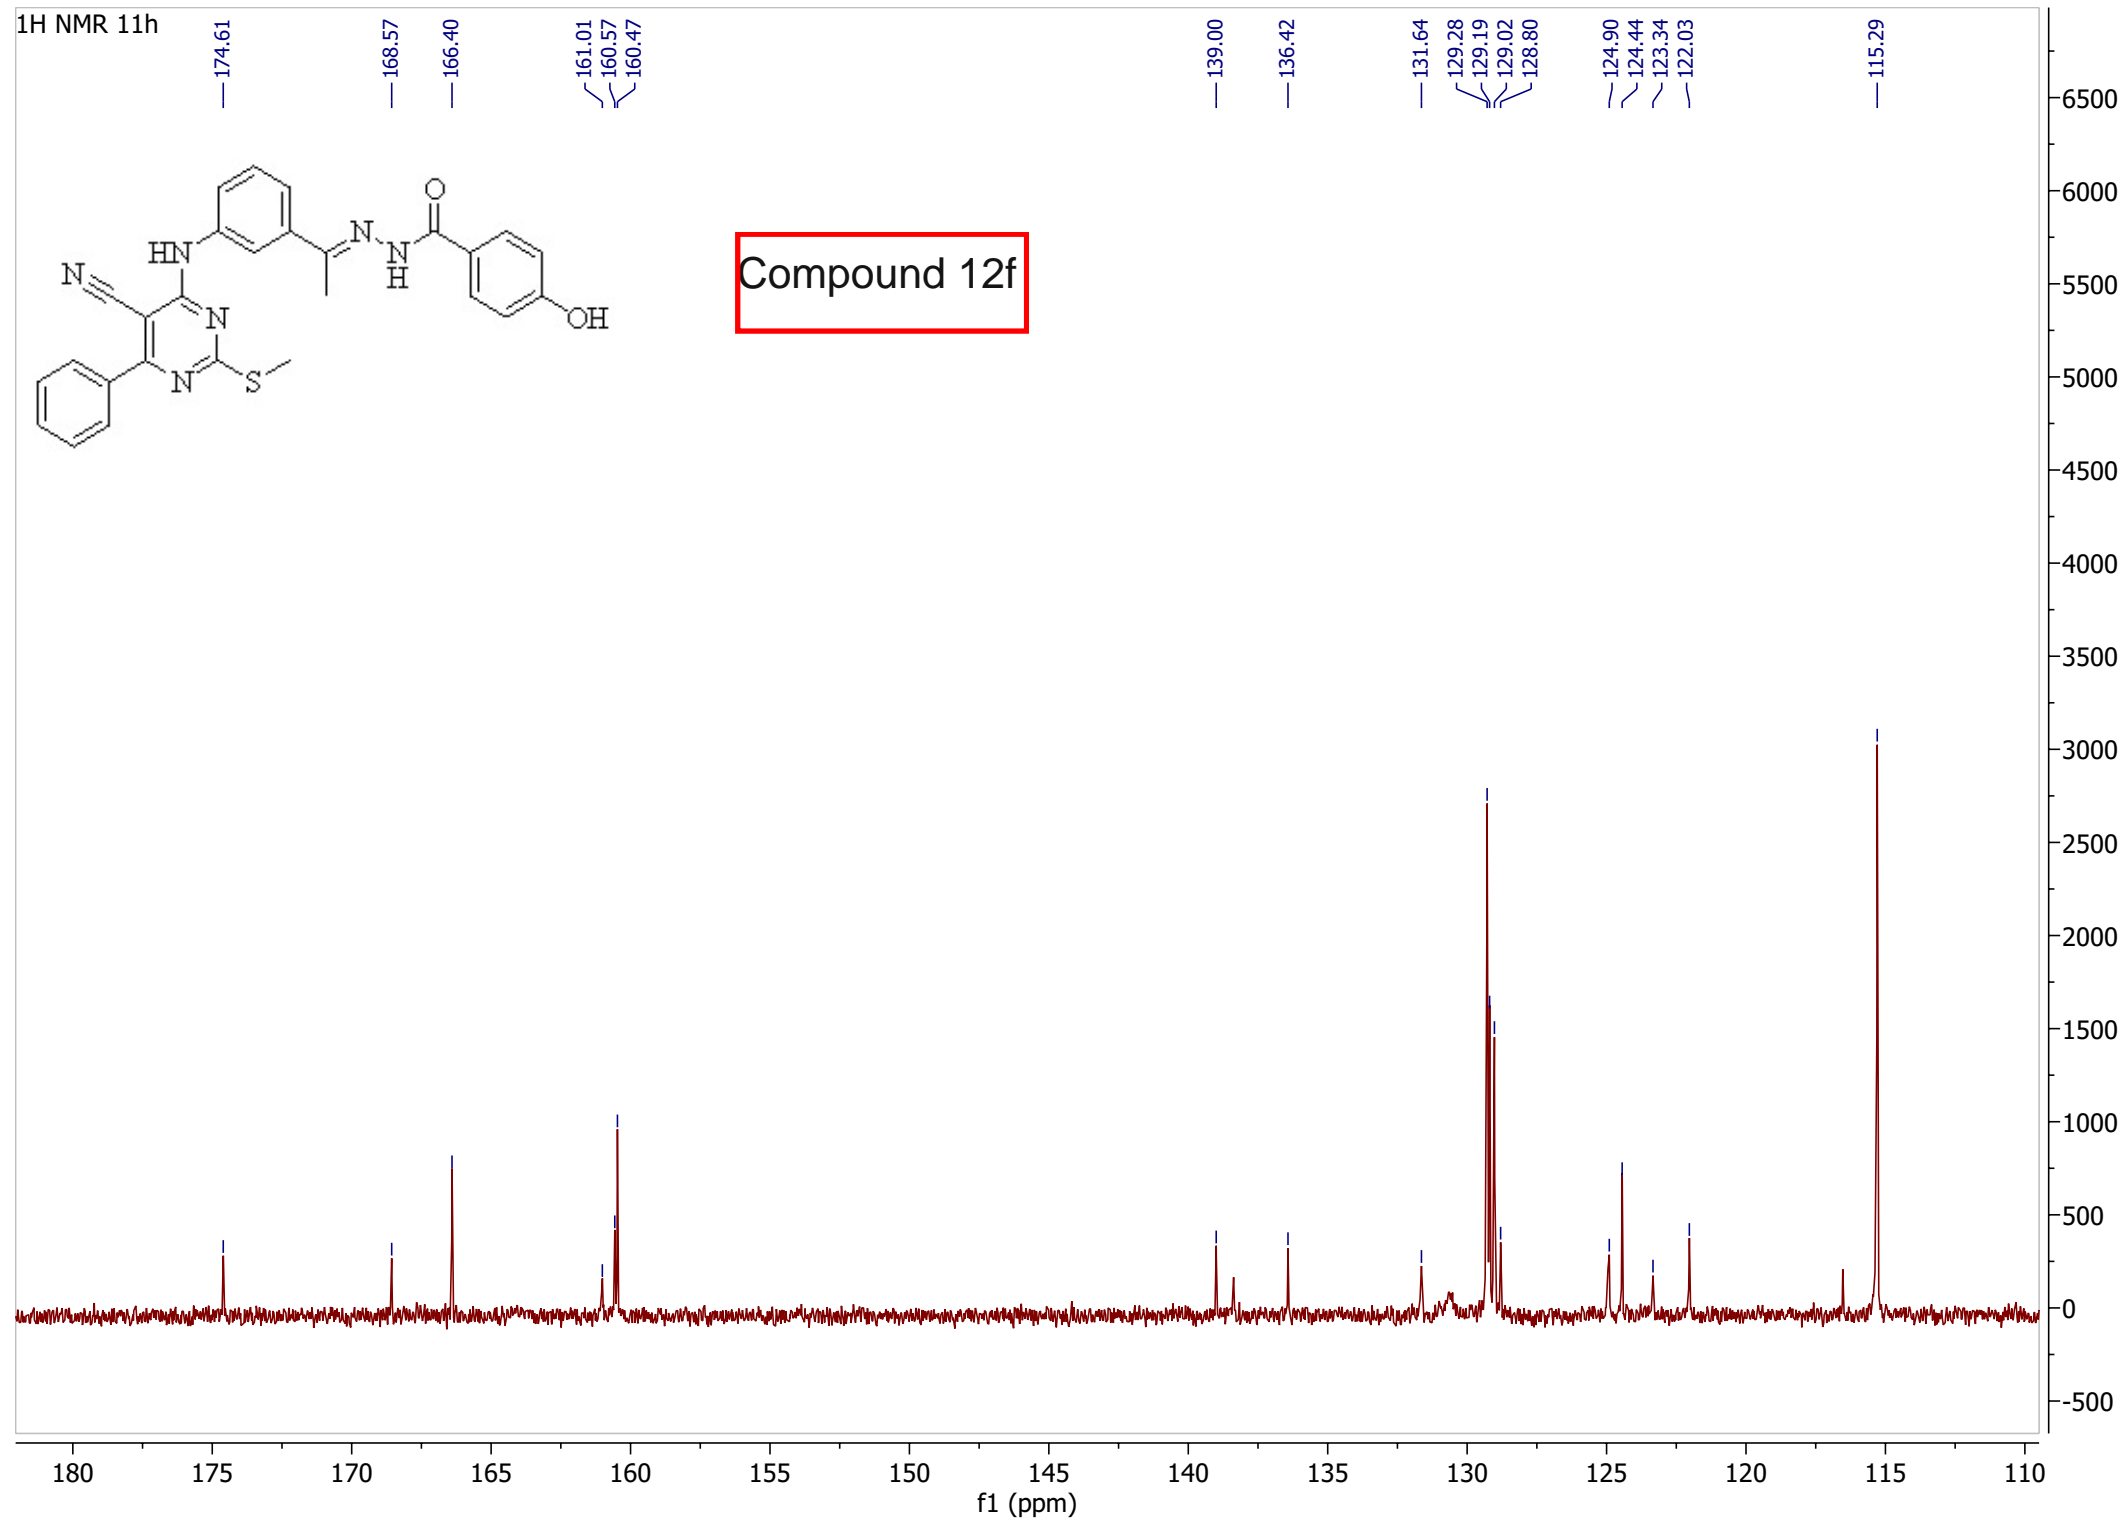

RT: 1.98 - 2.33 SM: 11B

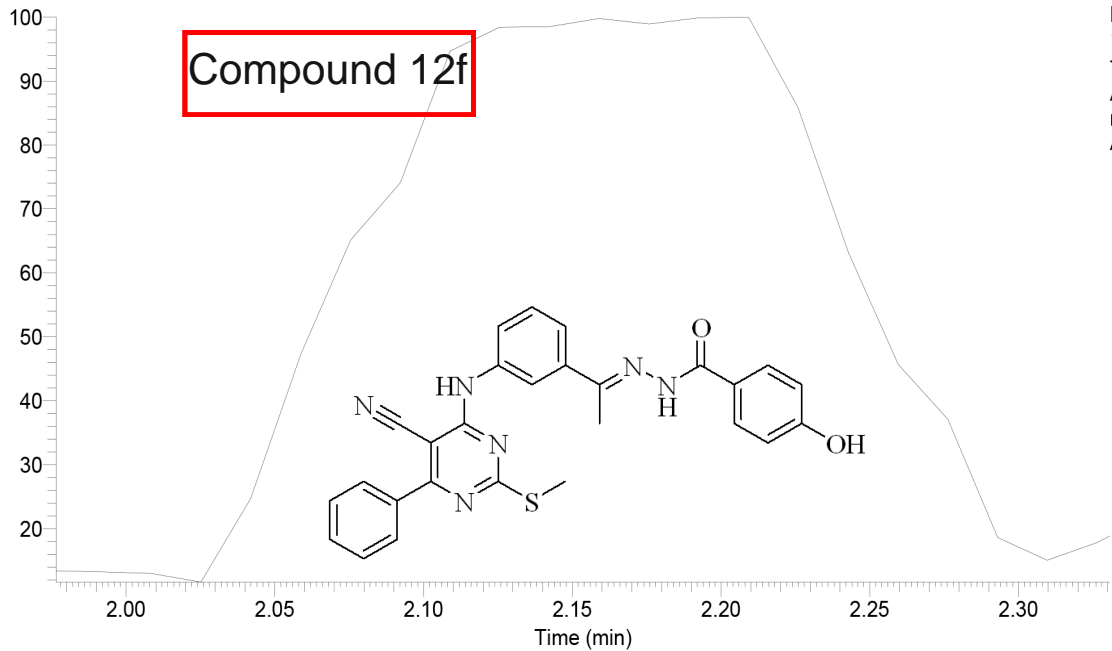

NL:  
1.30E4  
TIC MS  
Abdelrahma  
n-saleh-  
AsZM4

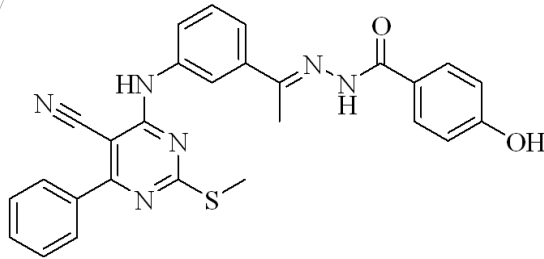

Abdelrahman-saleh-AsZM4 #92 RT: 1.56 AV: 1 SB: 26 1.21-1.34 , 0.87-1.14 NL: 4.15E2  
T: + c EI Full ms [40.00-1000.00]

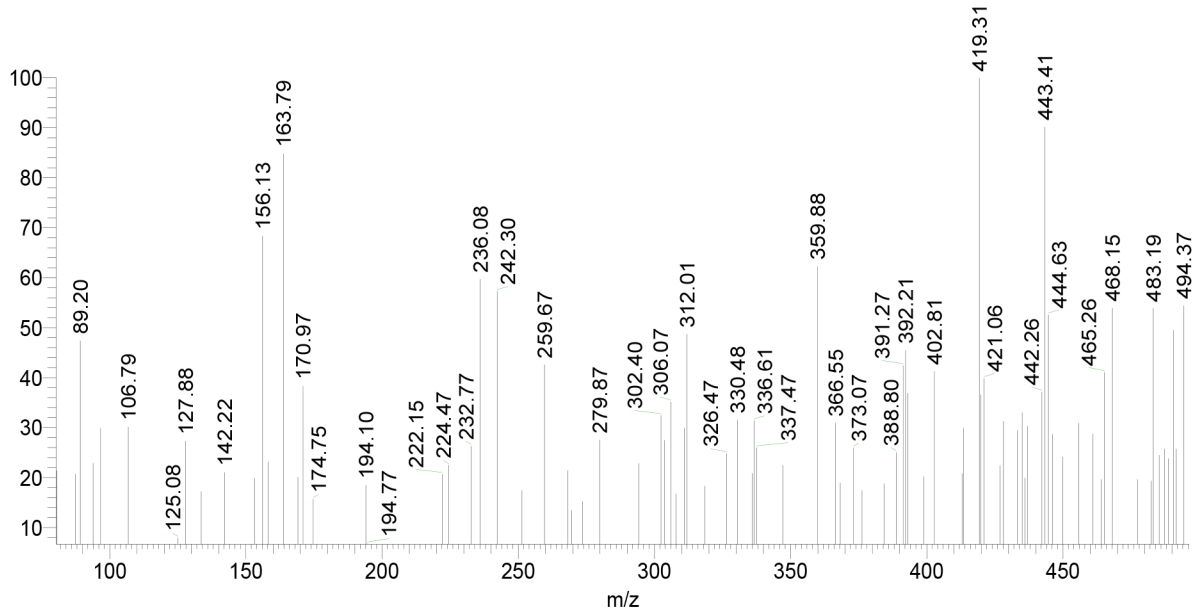

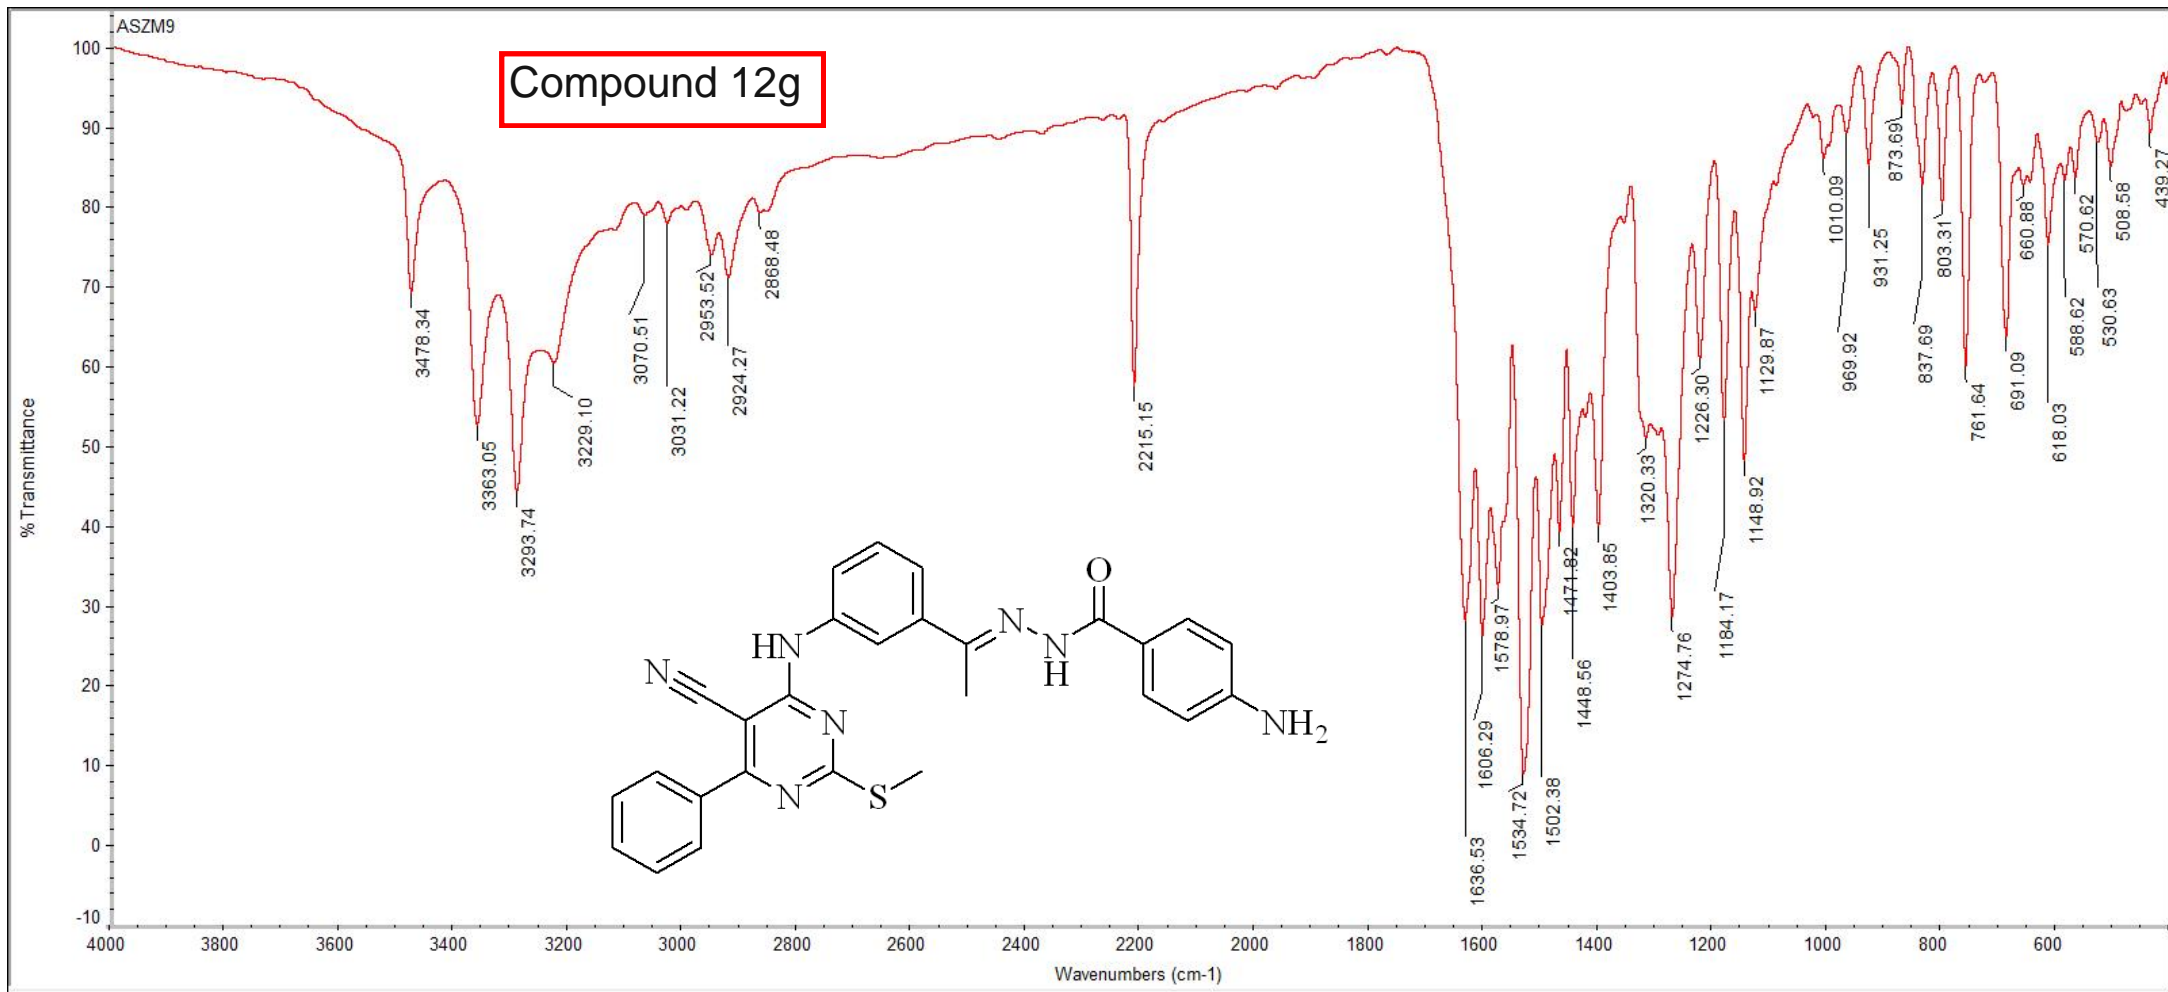



<sup>1</sup>H NMR 11h

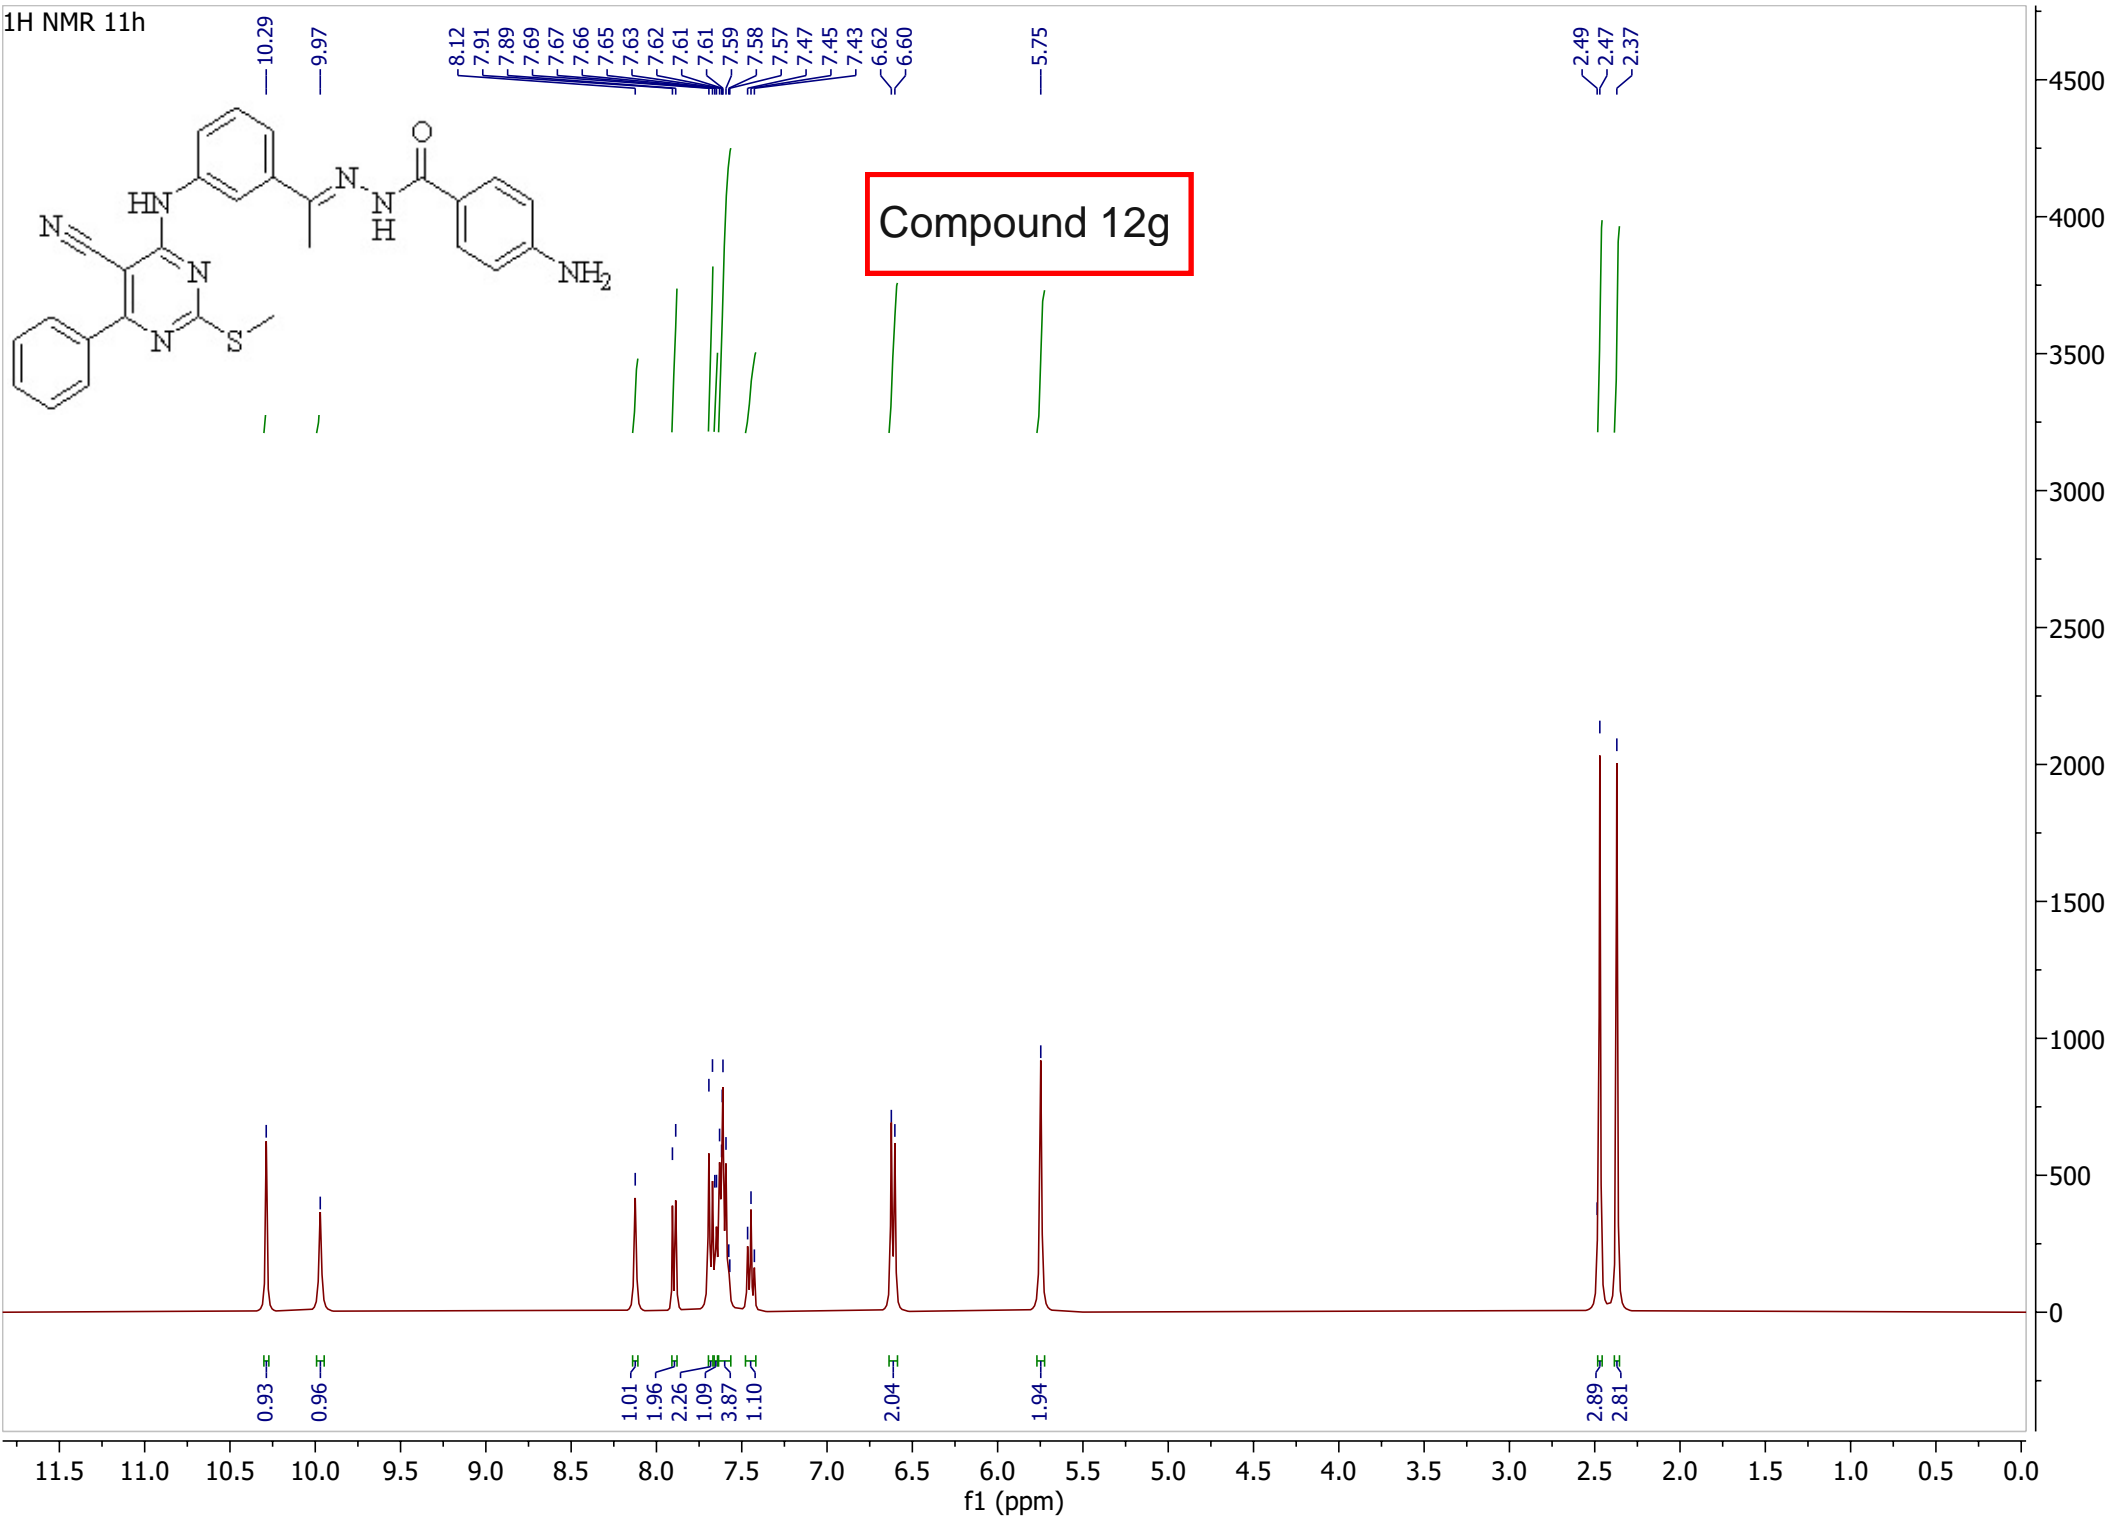

<sup>1</sup>H NMR 11h

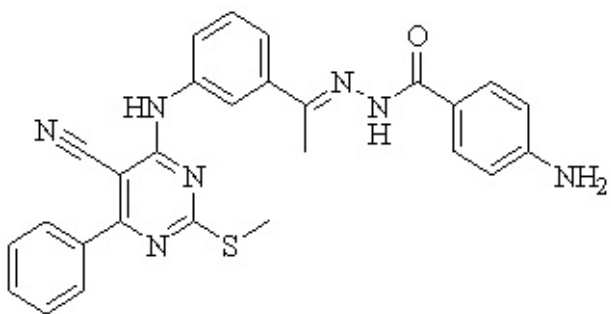

Compound 12g

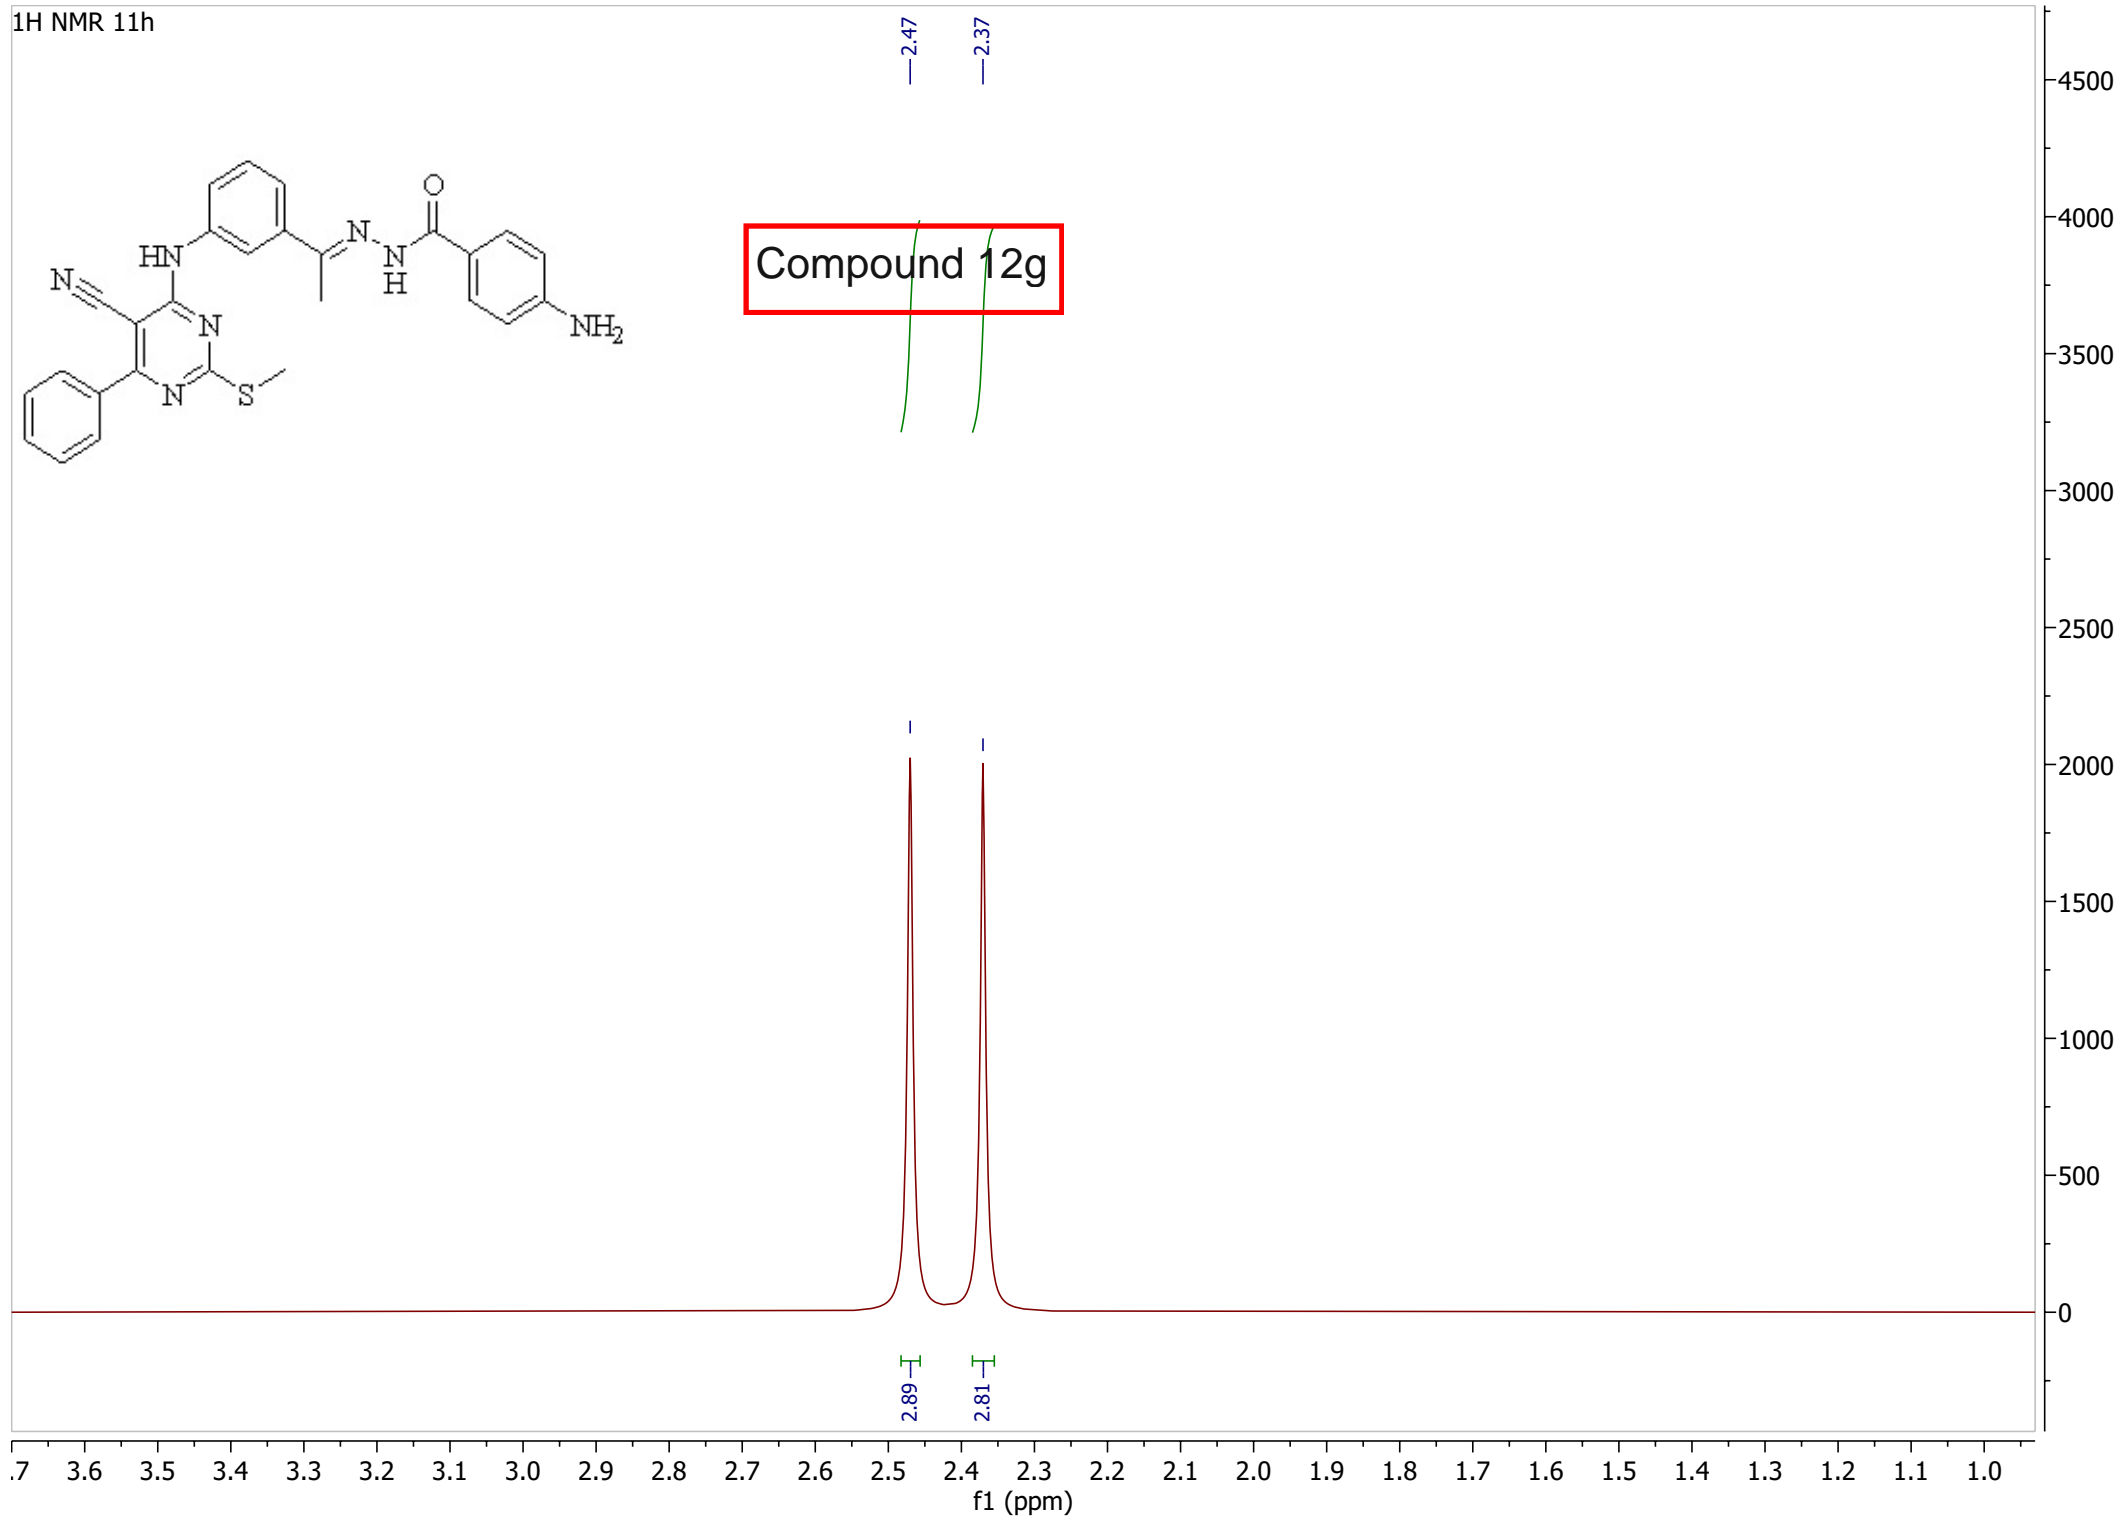

<sup>1</sup>H NMR 11h

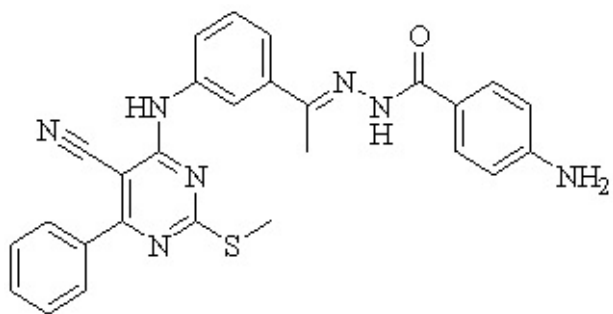

Compound 12g

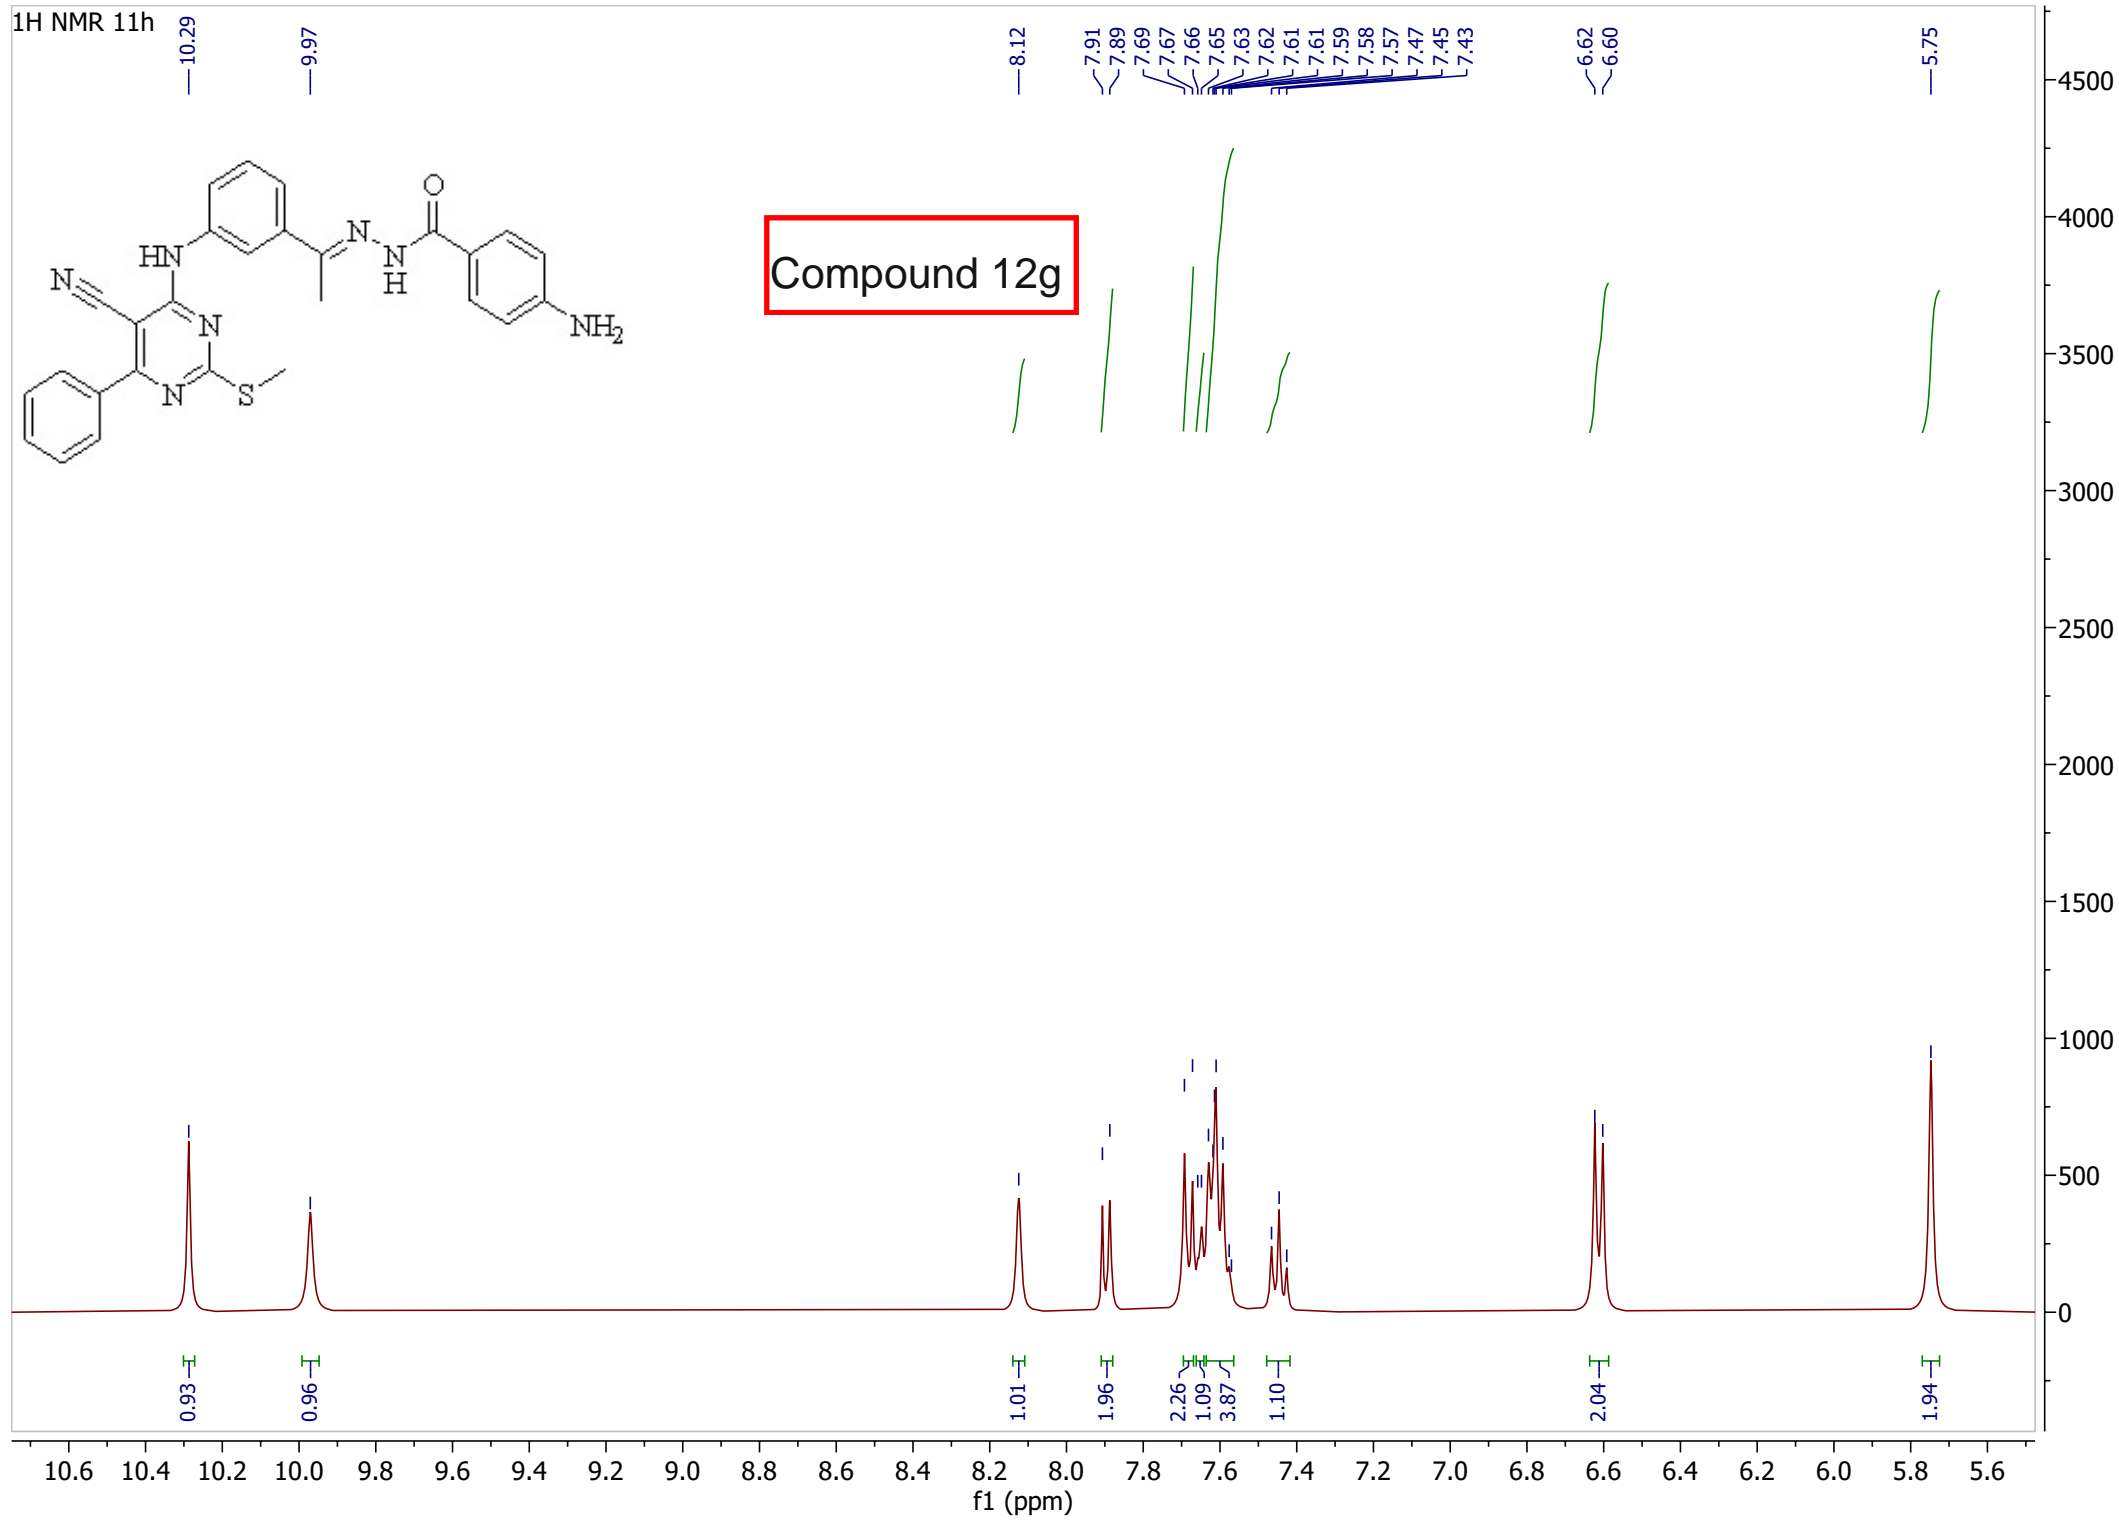

<sup>1</sup>H NMR 11h

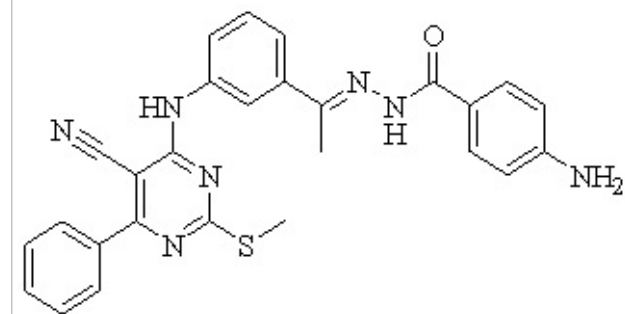

Compound 12g

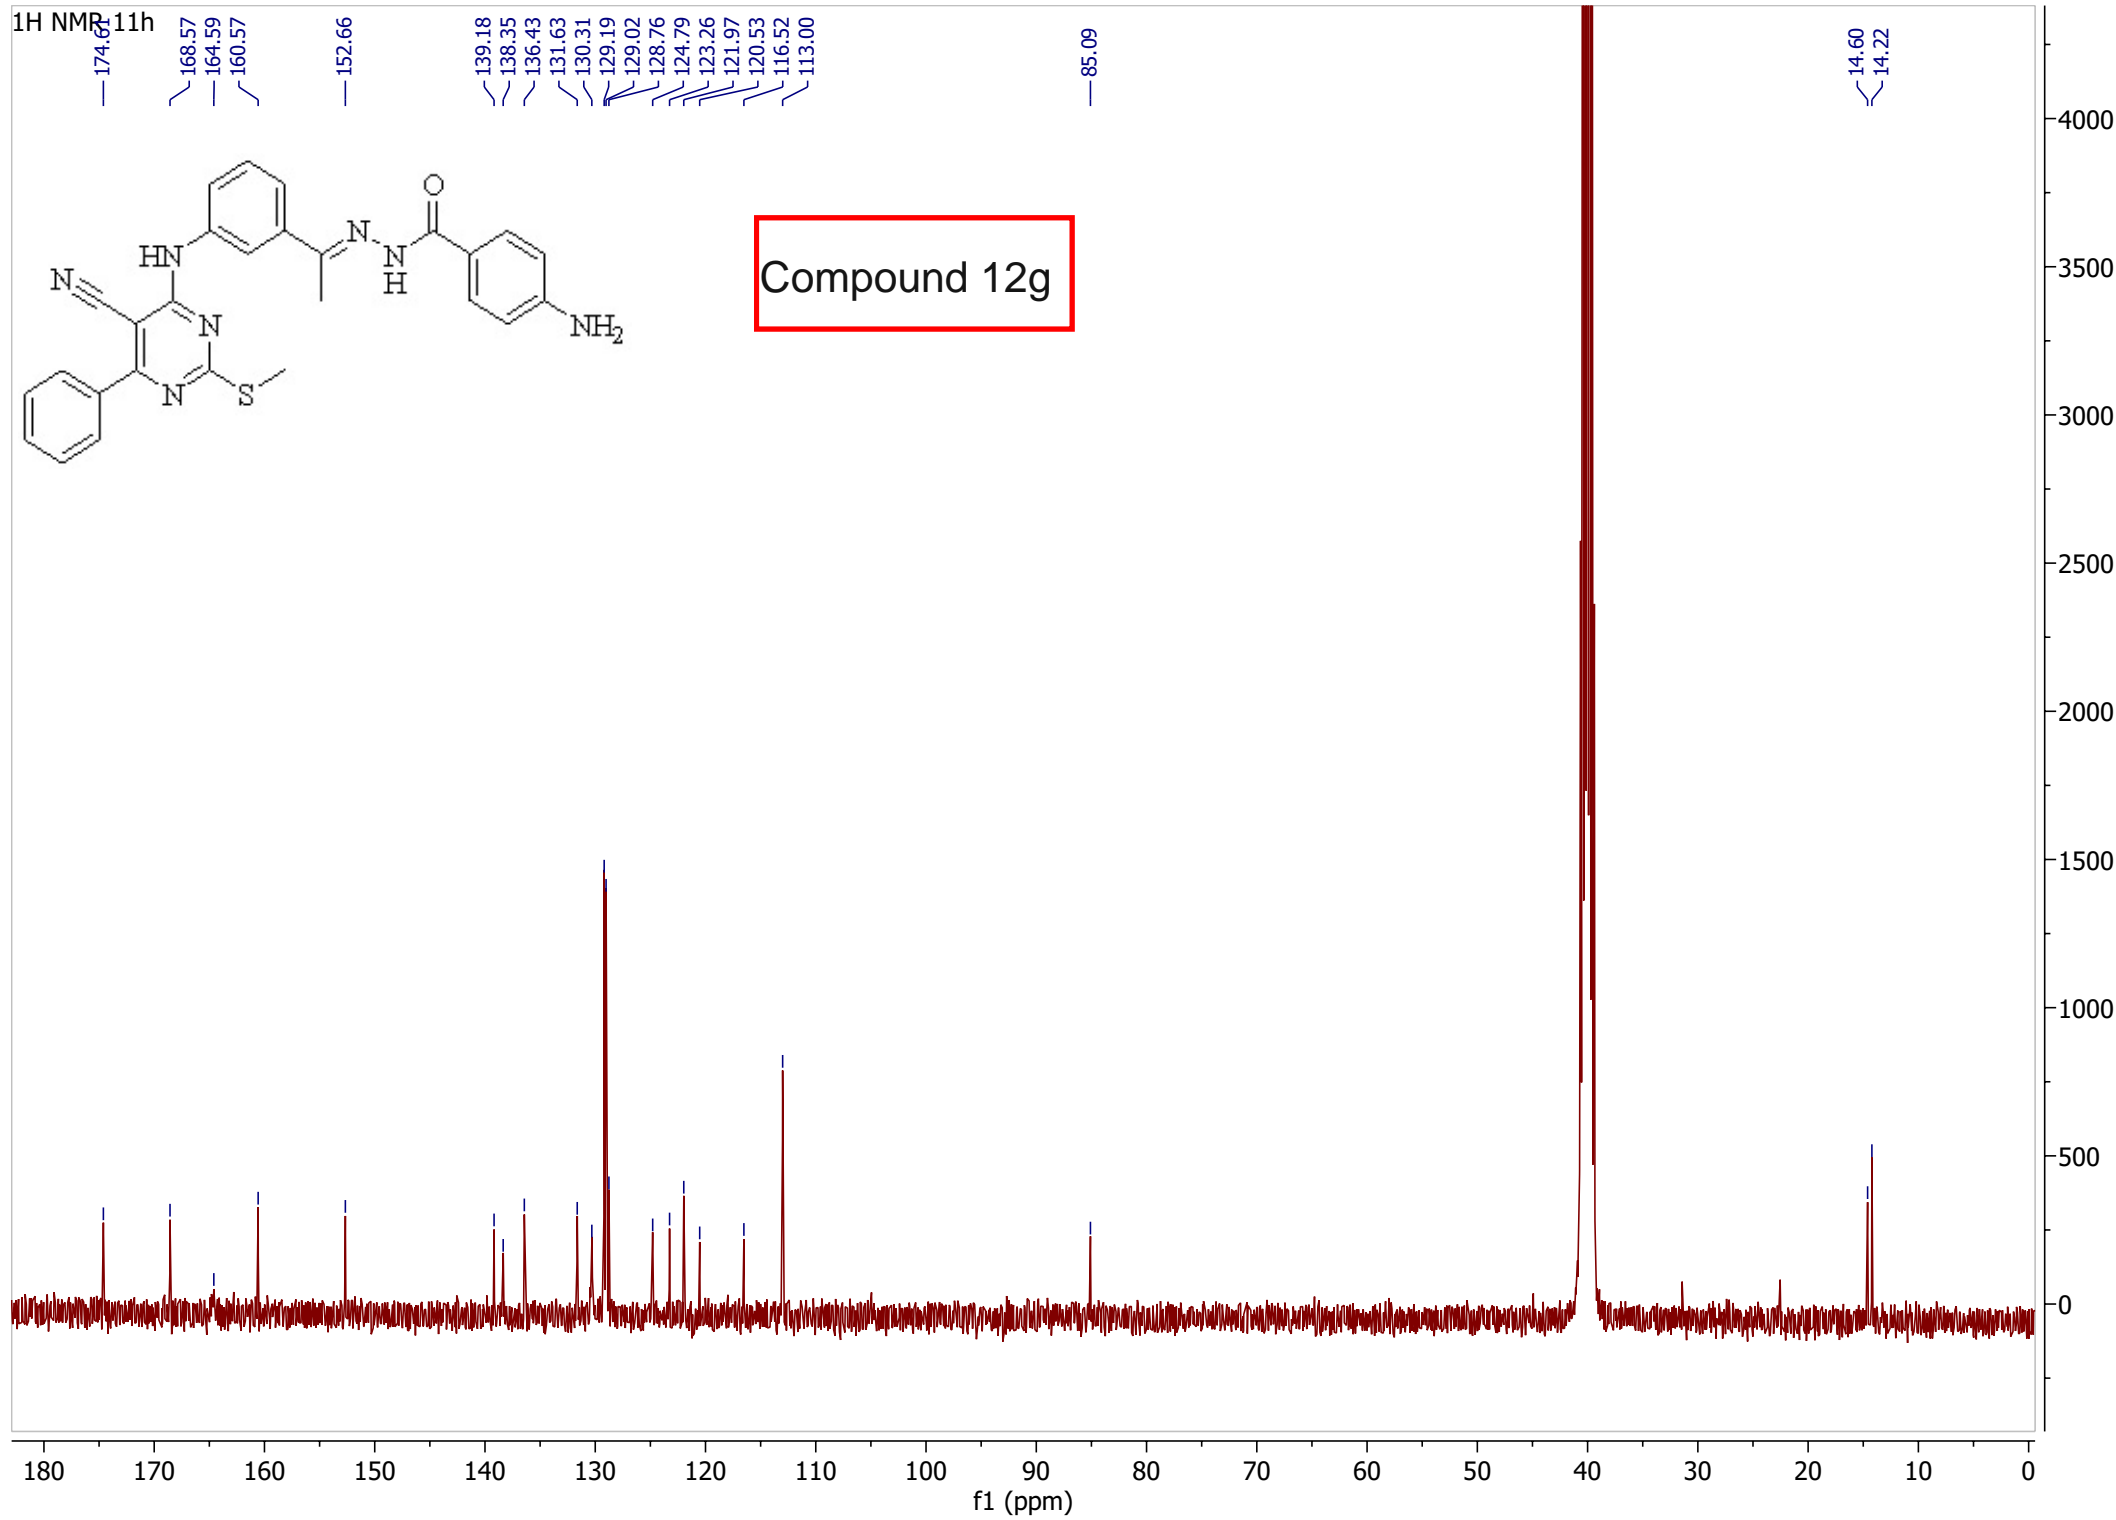

<sup>1</sup>H NMR 11g

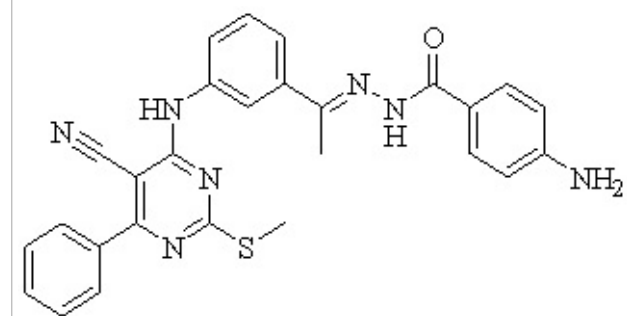

Compound 12g

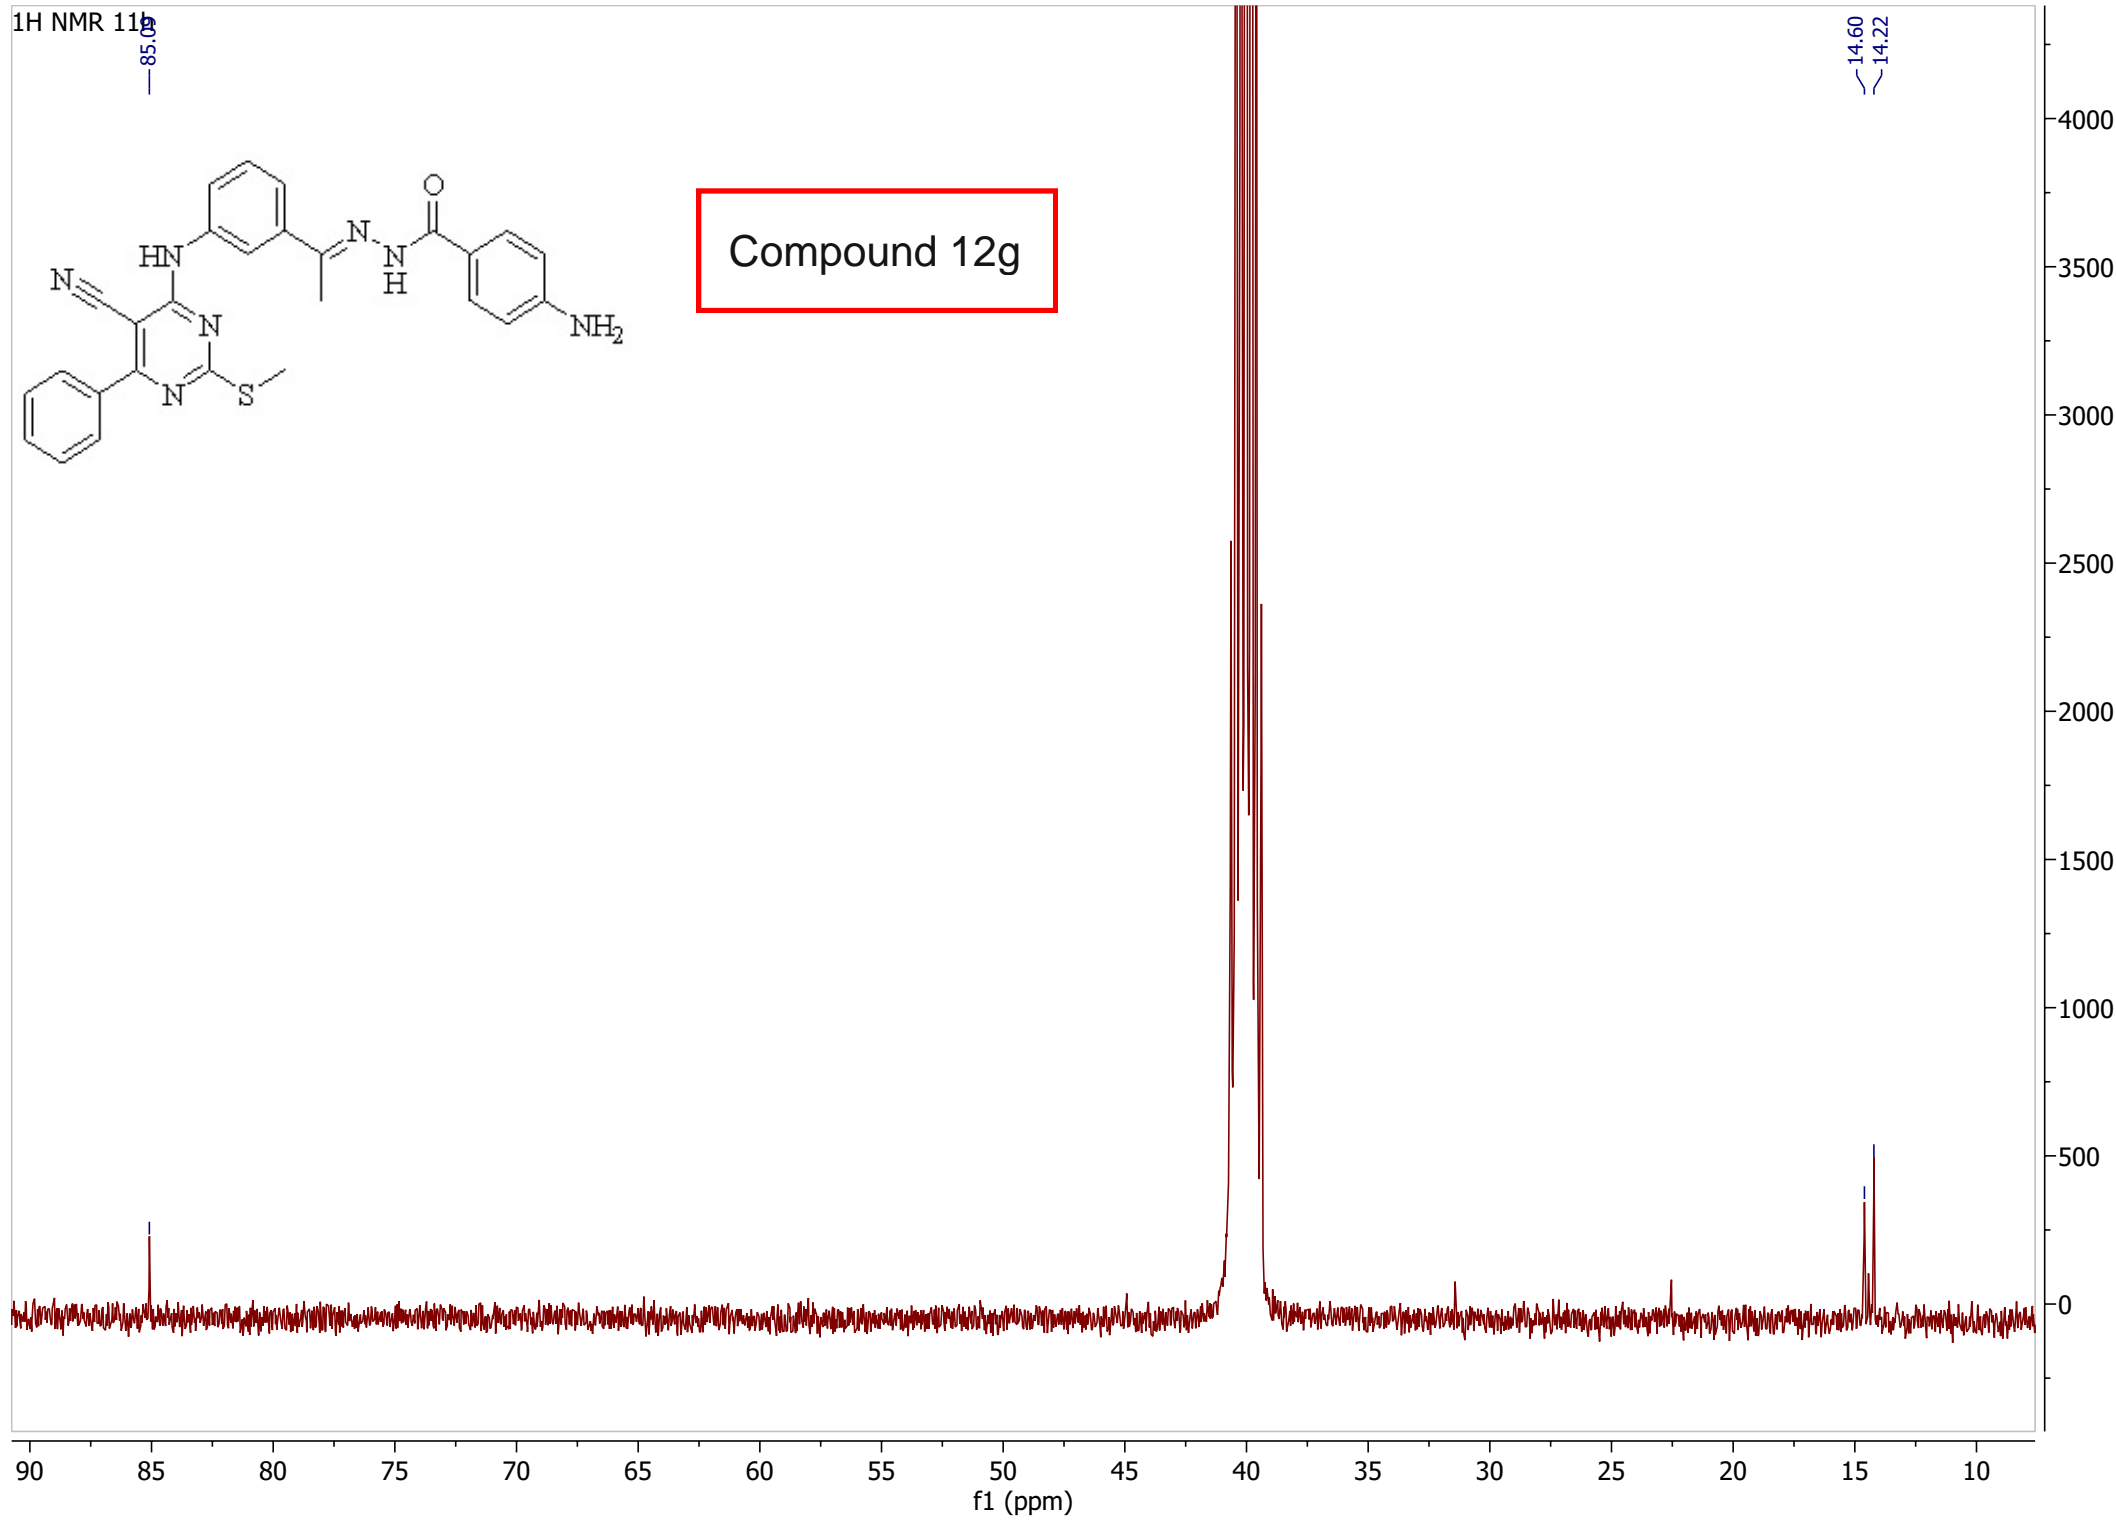

<sup>1</sup>H NMR 11h

— 174.61

— 168.57

— 164.59

— 160.57

— 152.66

— 139.18

— 138.35

— 136.43

— 131.63

— 130.31

— 129.19

— 129.02

— 128.76

— 124.79

— 123.26

— 121.97

— 120.53

— 116.52

— 113.00

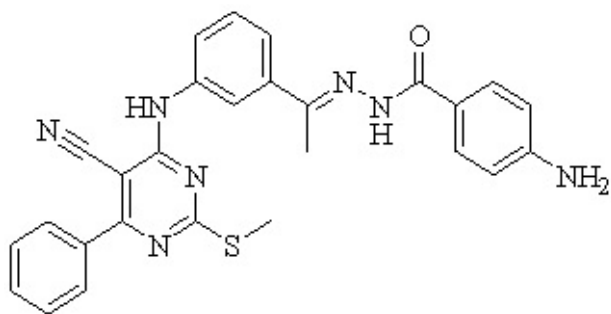

Compound 12g

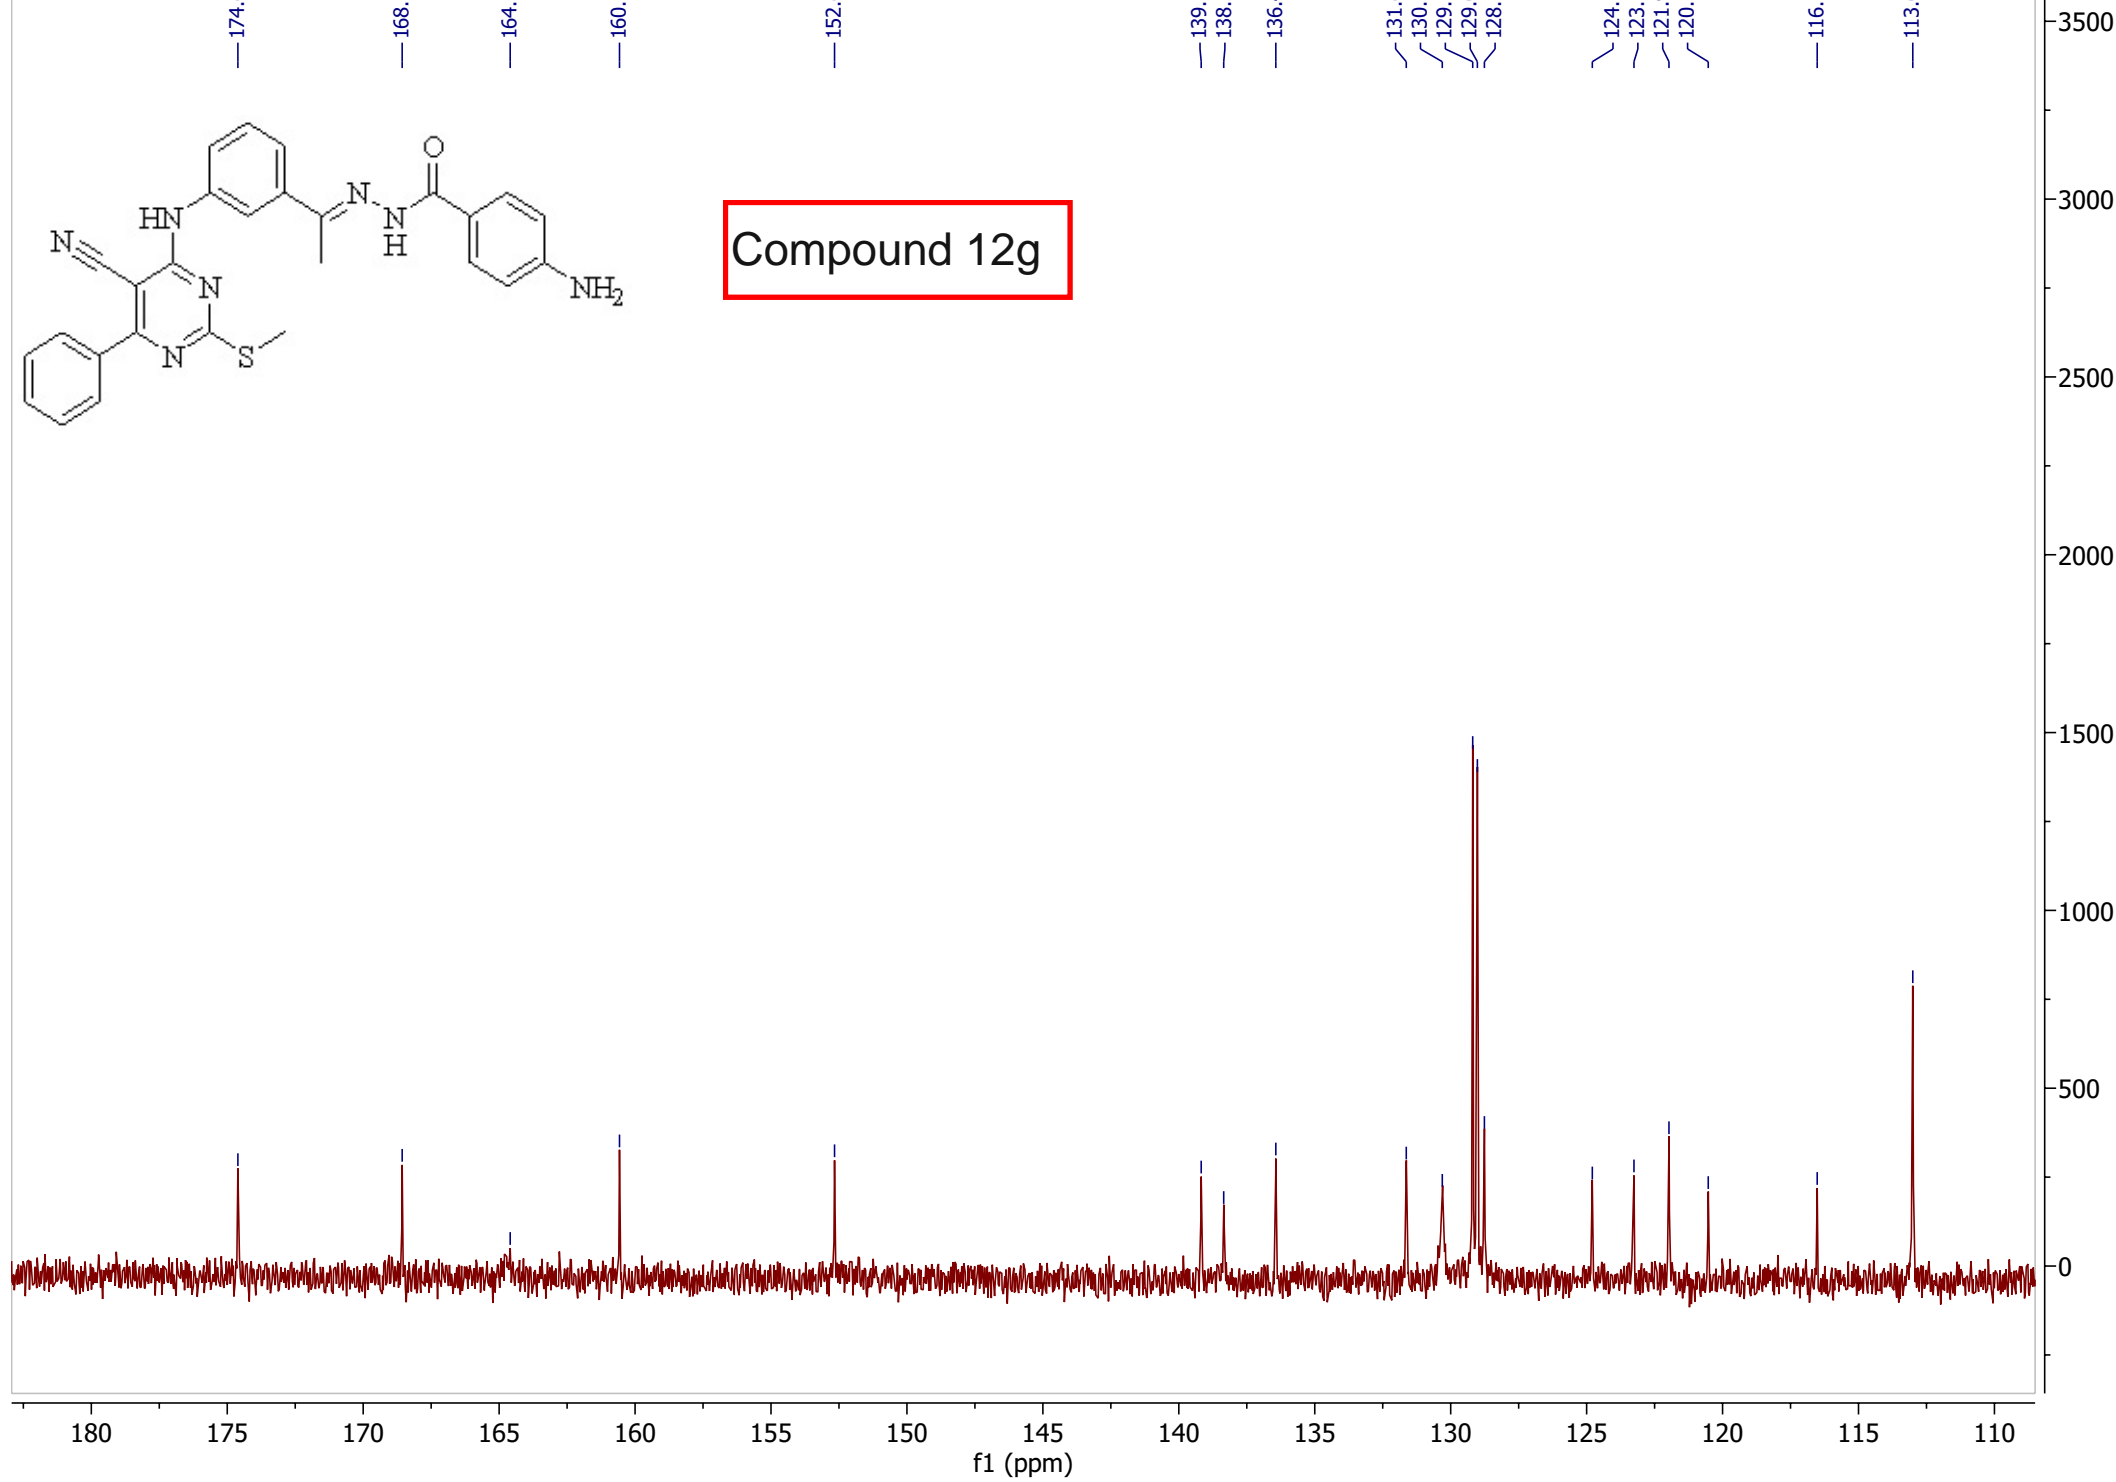

Supplement: d3ra04182d1.pdf [file d3ra04182d1.pdf]
